# Supplementary material for: Disease- and sex-specific differences in patients with heart valve disease: a proteome study
Source: Life Sci Alliance. 2023 Jan 10;6(3):e202201411. doi: 10.26508/lsa.202201411 (PMC9834574; doi:10.26508/lsa.202201411)
Supplement: Supplementary file 1 [file LSA-2022-01411_TableS1.xlsx]

## Sheet: DiffExp_disease
Supplementary table 1 - Results of differential abundance analysis in conditions using limma's moderated t test.
AvC = AS vs CON
MvC = MR vs CON
AvM = AS vs MR
AS = aortic valve stenosis, MR = mitral valve regurgitation, CON = controls, F = female, M = male, n.s. = not significant, up = positive log2 fold change, do = negative log2 fold change
specific = significant change in a condition versus CON AND versus the respective other condition
divergent = significant change in both conditions versus CON AND against the respective other condition, but with opposing fold changes (different signs)
shared = significant change in both conditions vs CON with congruent fold changes (same signs)
				Benjamini-Hochberg corrected p-values			effects details			log2 fold changes
Protein IDs	Majority protein IDs	Gene names	log2 Average Expression	AS vs CON	AS vs MR	MR vs CON	AS vs CON	AS vs MR	MR vs CON	AS vs CON	AS vs MR	MR vs CON	effect scatter plot	effect volcano
A0A024R216;Q9Y3E1;H3BPM9;H3BPQ6	A0A024R216;Q9Y3E1	HDGFRP3	26.9311	0.756155	0.525401	0.543295	n.s.	n.s.	n.s.	0.139441	-0.285546	0.424987		n.s.
A0A024R442;E7ETB3;Q9ULA0;F8WAN0;E5RJ35	A0A024R442;E7ETB3;Q9ULA0	DNPEP	30.2601	0.000549574	0.00168772	0.969537	AvC_do	AvM_do	n.s.	-0.543394	-0.527648	-0.0157464	AS specific	changed in MR
A0A024R4E5;Q00341;Q00341-2;H0Y394;H7C0A4;C9JIZ1;C9J5E5;H7C2D1;C9JZI8;H7BZC3;C9JHZ8;C9JES8;C9JHS7;C9JT62;C9JK79;C9JBS3;C9JEJ8;C9JHN6;C9JMQ6;C9JQ82;C9JHS9;C9J739;H7C3D0	A0A024R4E5;Q00341;Q00341-2;H0Y394	HDLBP	30.0978	0.533303	0.388623	0.901054	n.s.	n.s.	n.s.	-0.157367	-0.223278	0.0659118		n.s.
A0A024R4K9;A0A087X266;Q9BXJ8-2;Q9BXJ8;A0A087WZA9;A0A087WV11;A0A087WZF4	A0A024R4K9;A0A087X266;Q9BXJ8-2;Q9BXJ8;A0A087WZA9	TMEM120A	28.336	0.647594	0.0835611	0.441982	n.s.	n.s.	n.s.	-0.104593	-0.373819	0.269227		n.s.
A0A024R4M0;P46781;B5MCT8;C9JM19;F2Z3C0;A8MXK4	A0A024R4M0;P46781;B5MCT8;C9JM19	RPS9	31.3645	2.49548e-06	0.0166441	0.116533	AvC_do	AvM_do	n.s.	-0.513561	-0.267236	-0.246325	AS specific	changed in MR
A0A024RA52;P25787;C9JCK5;H3BT36;H7C402	A0A024RA52;P25787;C9JCK5	PSMA2	30.8798	0.403444	0.363636	0.965364	n.s.	n.s.	n.s.	-0.165674	-0.187729	0.022055		n.s.
A0A024RCR6;A0A0G2JK23;P46379-2;P46379;P46379-3;A0A0G2JL47;P46379-5;P46379-4;F6S6P2;X6REW1;A0A0G2JJM1;A0A1B0GX79;F6WML8;F6VEM6;F6X9W3;F6U341;F6U1F2;F6XTU0;A0A0G2JJR8;F6TC96;H0Y710;H0Y4L1	A0A024RCR6;A0A0G2JK23;P46379-2;P46379;P46379-3;A0A0G2JL47;P46379-5;P46379-4;F6S6P2;X6REW1;A0A0G2JJM1	BAG6	27.2191	0.363203	0.0090441	0.257301	n.s.	AvM_do	n.s.	-0.169467	-0.483762	0.314295		changed in MR
A0A075B6K5	A0A075B6K5	IGLV3-9	27.9838	0.149427	0.119151	0.0223797	n.s.	n.s.	MvC_up	0.618748	-0.702172	1.32092		n.s.
A0A075B6P5;P01615	A0A075B6P5;P01615	IGKV2-28	27.1329	0.919287	0.243081	0.411641	n.s.	n.s.	n.s.	0.077764	-0.76642	0.844184		n.s.
A0A0C4DH68;A0A075B6R9	A0A0C4DH68;A0A075B6R9	IGKV2-24	26.2785	0.216436	0.0184926	0.00471741	n.s.	AvM_do	MvC_up	0.667371	-1.3091	1.97647	MR sepcific	changed in MR
A0A075B6S2;A0A0A0MRZ7	A0A075B6S2	IGKV2D-29	29.5703	0.159241	0.608368	0.179255	n.s.	n.s.	n.s.	0.676546	-0.287412	0.963958		n.s.
A0A075B749;A0A087WX83;A0A087WVF8;Q5VU43-3;Q5VU43-13;Q5VU43-2;Q5VU43-12;Q5VU43-8;Q5VU43-9;H0YCY0;A0A087WWY1;A0A087WWI2;A0A087WVQ4;A0A087WWK4;A0A087X041;A0A087X0I1;E9PNE0;H0YCH7;A0A087X229	A0A075B749;A0A087WX83;A0A087WVF8;Q5VU43-3	PDE4DIP	24.9763	0.522197	0.55582	0.412537	n.s.	n.s.	n.s.	-0.432276	0.427937	-0.860213		n.s.
A0A087WSV8;P80303-2;P80303;E9PKG6;E9PLR0;E9PLE9;A0A2R8Y6G7;H0YD18;E9PJP3;E9PM22	A0A087WSV8;P80303-2;P80303;E9PKG6	NUCB2	27.2013	0.218086	0.442899	0.862804	n.s.	n.s.	n.s.	-0.388148	-0.267743	-0.120405		n.s.
A0A087WSY5;Q96IY4;Q96IY4-2	A0A087WSY5;Q96IY4;Q96IY4-2	CPB2	26.6576	0.138814	0.214214	0.0424675	n.s.	n.s.	MvC_up	0.781812	-0.700243	1.48205		n.s.
A0A087X2I2;A0A087WT12;P36969-2;P36969;K7EJ20;K7EKX7;K7ENB4;R4GNE4;A0A0A0MTT1;A0A087X247	A0A087X2I2;A0A087WT12;P36969-2;P36969;K7EJ20;K7EKX7;K7ENB4;R4GNE4;A0A0A0MTT1	GPX4	29.2027	0.977272	0.815158	0.909761	n.s.	n.s.	n.s.	0.00566638	0.0446159	-0.0389495		n.s.
A0A087WT47;P19237;G3V489;G3V4F8;G3V3L5	A0A087WT47;P19237;G3V489;G3V4F8;G3V3L5	TNNI1	29.7743	2.15102e-07	0.892494	7.03545e-05	AvC_up	n.s.	MvC_up	3.26688	0.10495	3.16193	shared	n.s.
A0A087WTA8;P08123	A0A087WTA8;P08123	COL1A2	32.9931	5.69722e-06	0.0577785	0.0627368	AvC_up	n.s.	n.s.	1.68216	0.726491	0.95567		n.s.
A0A087WTF0;A2A3K4-2	A0A087WTF0;A2A3K4-2	PTPDC1	23.4386	0.462825	0.0771319	0.549024	n.s.	n.s.	n.s.	0.421068	0.997206	-0.576137		n.s.
A0A087WTU1;Q15345-3;A0A087X0S7	A0A087WTU1;Q15345-3;A0A087X0S7	LRRC41	25.9757	0.0465751	0.539527	0.0567058	AvC_up	n.s.	n.s.	1.41774	-0.512411	1.93016		n.s.
A0A087WU02;Q96RQ1;H0YI50;F8VPA6;H0YI58;F8W0R1;F8VR88;F8VUZ2;H0YHS0;H0YHJ8	A0A087WU02;Q96RQ1;H0YI50;F8VPA6	ERGIC2	24.7037	0.836878	0.400902	0.734134	n.s.	n.s.	n.s.	-0.103586	-0.398576	0.29499		n.s.
A0A087WU07;Q5TGZ0;Q5TGZ0-2;R4GNA1;A0A3B3IRY5;R4GMM1;R4GMY4	A0A087WU07;Q5TGZ0;Q5TGZ0-2	MINOS1	27.8352	0.99824	0.0397974	0.146086	n.s.	AvM_up	n.s.	0.00088064	1.06929	-1.0684		changed in AS
A0A087WU53;Q9H0U3;Q9H0U3-2	A0A087WU53;Q9H0U3	MAGT1	27.044	0.152787	0.176215	0.999227	n.s.	n.s.	n.s.	-0.363888	-0.364455	0.000567069		n.s.
A0A087WUC6;E9PI68;Q15005;E9PL01;E9PRB9;H0YE04	A0A087WUC6;E9PI68;Q15005;E9PL01;E9PRB9	SPCS2	26.5632	0.40053	0.498608	0.291167	n.s.	n.s.	n.s.	-0.328576	0.287019	-0.615594		n.s.
J3QTS8;A0A087WUI4;A0A087X1U0;Q15661-2;Q15661;P20231;A0A0C4DGM1;A0A0C4DFZ7;Q9BZJ3-2;Q9BZJ3;A6NIE9	J3QTS8;A0A087WUI4;A0A087X1U0;Q15661-2;Q15661;P20231;A0A0C4DGM1	TPSAB1	28.5275	0.354826	0.00122784	0.0878083	n.s.	AvM_do	n.s.	-0.607843	-2.14986	1.54202		changed in MR
A0A087WUK2;O14979;REV__Q8N0S2-3;REV__Q8N0S2-2;REV__A0A0B4J1R9;REV__Q8N0S2	A0A087WUK2;O14979	HNRNPDL	29.6687	0.449153	0.00779503	0.195534	n.s.	AvM_do	n.s.	-0.119314	-0.409509	0.290195		changed in MR
A0A087WUQ6;P07203;A0A2R8Y6B6;P07203-2	A0A087WUQ6;P07203;A0A2R8Y6B6	GPX1	30.4306	0.0681282	0.00496056	0.530903	n.s.	AvM_do	n.s.	-0.312736	-0.505312	0.192576		changed in MR
E7ETK0;A0A2R8Y849;A0A087WUS0;A0A2R8YD14;P62847-2;P62847-3;P62847;P62847-4;A0A2R8Y8A0	E7ETK0;A0A2R8Y849;A0A087WUS0;A0A2R8YD14;P62847-2;P62847-3;P62847;P62847-4	RPS24	28.7771	1.16553e-05	0.000356012	0.781637	AvC_do	AvM_do	n.s.	-1.22929	-1.06568	-0.163616	AS specific	changed in MR
A0A087WUT6;O60841	A0A087WUT6;O60841	EIF5B	27.8324	0.00407304	0.0852566	0.581183	AvC_do	n.s.	n.s.	-0.782925	-0.503674	-0.279252		n.s.
A0A087WV05;Q99417;A0A0D9SEI7	A0A087WV05;Q99417	GJA9-MYCBP	26.7391	0.770465	0.46189	0.505742	n.s.	n.s.	n.s.	0.219126	-0.541917	0.761043		n.s.
A0A087WVA1;P62341;Q6IAK0;F8WBD0	A0A087WVA1;P62341;Q6IAK0	SELENOT	25.5669	0.454357	0.388548	0.259812	n.s.	n.s.	n.s.	-0.260392	0.312193	-0.572585		n.s.
A0A087WVP1;Q14517;D6RCE4	A0A087WVP1;Q14517	FAT1	28.5678	0.605044	0.0465599	0.351107	n.s.	AvM_up	n.s.	0.205427	0.75225	-0.546822		changed in AS
A0A087WWM4;F8WAN9;Q9P2T1;H0YMB3;H0YNJ6;Q9P2T1-3;Q9P2T1-2;H0YLV5;H0YLB8;H0YNH0;H0YK13;H0YMR9;H0YK71;H0YMV5;H0YN22;A0A0B4J281;H0YMG3;H0YKK3;H0YN74;H0YMW6;H0YL68;H0YKE1	A0A087WWM4;F8WAN9;Q9P2T1;H0YMB3;H0YNJ6;Q9P2T1-3;Q9P2T1-2;H0YLV5;H0YLB8	GMPR2	25.4514	0.0567456	0.0210891	0.806839	n.s.	AvM_do	n.s.	-0.761267	-0.973719	0.212452		changed in MR
A0A087WX02;F8WB74;P63302	A0A087WX02;F8WB74;P63302	SELENOW	27.1571	0.897205	0.40504	0.695558	n.s.	n.s.	n.s.	0.0476128	0.270489	-0.222876		n.s.
H3BS47;A0A087WX34;H3BV03;Q68CZ1-2;Q68CZ1;H3BPF5;I3L2P2;I3L1B5;H3BPS4	H3BS47;A0A087WX34;H3BV03;Q68CZ1-2;Q68CZ1;H3BPF5	RPGRIP1L	27.6295	0.59669	0.0158285	0.202369	n.s.	AvM_do	n.s.	-0.605078	-2.6175	2.01243		changed in MR
A0A087WXC5;E7ESZ7;O95299;O95299-2;C9J6X0;Q8N1B9;H7C2W5;H7C1Y7;H7C2X4	A0A087WXC5;E7ESZ7;O95299;O95299-2	NDUFA10	34.4686	1.31737e-05	0.0400625	0.132128	AvC_do	AvM_do	n.s.	-0.576345	-0.283673	-0.292672	AS specific	changed in MR
A0A087WY55;Q9NP79;Q5TGM0;Q9NP79-2	A0A087WY55;Q9NP79;Q5TGM0;Q9NP79-2	VTA1	28.1793	0.435543	0.674381	0.887048	n.s.	n.s.	n.s.	-0.132501	-0.0805197	-0.0519817		n.s.
A0A087WY71;E9PFW3;Q96CW1-2;Q96CW1;C9JJ47;C9JJD3;C9JPV8;H7C4C3	A0A087WY71;E9PFW3;Q96CW1-2;Q96CW1;C9JJ47	AP2M1	29.5572	0.535571	0.003736	0.1044	n.s.	AvM_do	n.s.	-0.111296	-0.503469	0.392174		changed in MR
A0A087WY85;P61077;P61077-3;D6RAH7;P61077-2;D6RAW0;D6RA11;D6RFM0;P62837-2;D6R9F6;D6R933;D6RGD0;D6R980;D6RIZ3	A0A087WY85;P61077;P61077-3;D6RAH7;P61077-2;D6RAW0;D6RA11;D6RFM0;P62837-2	UBE2D3	28.6001	0.876819	0.83431	0.978487	n.s.	n.s.	n.s.	-0.0692312	-0.0950012	0.02577		n.s.
A0A087WYF7;Q6UXV4;A0A087WUX8	A0A087WYF7;Q6UXV4;A0A087WUX8	APOOL	32.1161	0.0234463	0.0471369	0.957123	AvC_do	AvM_do	n.s.	-0.282322	-0.264315	-0.0180066	AS specific	changed in MR
A0A087WYR0;P09132;A0A2U3TZN1;A0A087WWU9;D6RBG4;A0A2R8Y4M3;P09132-2	A0A087WYR0;P09132;A0A2U3TZN1;A0A087WWU9	SRP19	24.3393	0.46566	0.497771	0.999094	n.s.	n.s.	n.s.	0.305963	0.304763	0.00119986		n.s.
A0A087WZE9;Q15651;Q15651-2	A0A087WZE9	HMGN3	27.3734	0.193753	0.488484	0.808298	n.s.	n.s.	n.s.	0.451572	0.272532	0.17904		n.s.
A0A087WZN1;O43837;A0A087X2E5;O43837-3;A0A0D9SG66	A0A087WZN1;O43837;A0A087X2E5	IDH3B	33.3627	0.109203	0.0632533	0.882335	n.s.	n.s.	n.s.	-0.209191	-0.254107	0.0449162		n.s.
A0A087WZT2;Q6UX53	A0A087WZT2;Q6UX53	METTL7B	25.0935	0.163773	0.199957	0.988172	n.s.	n.s.	n.s.	-0.72351	-0.70712	-0.0163899		n.s.
F5H3Q5;A0A087WZY5;F5H851;A8MXH5;Q14031-2;Q14031	F5H3Q5;A0A087WZY5;F5H851;A8MXH5;Q14031-2;Q14031	COL4A6	27.4699	0.000253972	0.116292	0.194253	AvC_up	n.s.	n.s.	2.46412	1.12734	1.33679		n.s.
A0A087X020;Q9Y3A5;F8WE72	A0A087X020;Q9Y3A5	SBDS	30.1883	0.0446588	0.152374	0.83204	AvC_up	n.s.	n.s.	0.208263	0.159045	0.0492182		n.s.
A0A087X0D5;P09668;E9PKT6;A0A3B3IRM7	A0A087X0D5;P09668	CTSH	25.6048	0.0533937	0.853131	0.282904	n.s.	n.s.	n.s.	-0.840165	-0.100085	-0.74008		n.s.
A0A087X0K0;P39059	A0A087X0K0;P39059	COL15A1	32.3038	0.0780035	0.00384995	0.467023	n.s.	AvM_do	n.s.	-0.242409	-0.416656	0.174247		changed in MR
A0A087X0R6;Q9UMY4-2;Q9UMY4;Q9UMY4-3	A0A087X0R6;Q9UMY4-2;Q9UMY4;Q9UMY4-3	SNX12	26.048	0.949734	0.0124074	0.0754687	n.s.	AvM_up	n.s.	0.0285335	0.922234	-0.893701		changed in AS
A0A087X0T3;A7E2Y1;Q5JW47;Q5JW45;A7E2Y1-2	A0A087X0T3;A7E2Y1	MYH7B	26.7334	0.90366	0.0014193	0.00800202	n.s.	AvM_up	MvC_do	-0.0694415	1.50722	-1.57666	MR sepcific	changed in AS
A0A087X0W7;A0A087WT95;P49753;P49753-2	A0A087X0W7;A0A087WT95;P49753;P49753-2	ACOT2	31.4013	0.00395539	0.0860102	0.575236	AvC_do	n.s.	n.s.	-1.96153	-1.25317	-0.708356		n.s.
A0A087X0X3;M0R2I7;M0QYQ7;M0R0Y6;M0QY96	A0A087X0X3	HNRNPM	31.9229	0.000433548	0.00028791	0.845828	AvC_do	AvM_do	n.s.	-0.371497	-0.417478	0.0459817	AS specific	changed in MR
A0A0G2JN29;A0A087X117;Q15155;A0A0G2JP90;A0A087WW46;H3BUC9;I3L0Q6;H3BTW1;H3BPS9	A0A0G2JN29;A0A087X117;Q15155;A0A0G2JP90;A0A087WW46	NOMO1	28.1352	0.135157	0.359884	0.823239	n.s.	n.s.	n.s.	-0.404886	-0.272855	-0.132032		n.s.
A0A087X1G7;O60613;A0A0J9YX89;A0A3B3IT39;A0A087WXL0;A0A0B4J1T0;A8MZD0;O60613-2	A0A087X1G7;O60613;A0A0J9YX89	SELENOF	25.5455	0.644045	0.502216	0.909761	n.s.	n.s.	n.s.	-0.261174	-0.389077	0.127903		n.s.
A0A087X1J7;P22352;H0YBE4;E5RG32;H0YC19	A0A087X1J7;P22352	GPX3	31.8772	0.458338	1.07025e-05	0.00185934	n.s.	AvM_do	MvC_up	-0.163681	-1.00823	0.844549	MR sepcific	changed in MR
A0A087X1K9;E5RJ48;E5RI35	A0A087X1K9;E5RJ48	LYPLA1	25.6651	0.32502	0.432248	0.959304	n.s.	n.s.	n.s.	0.622285	0.53899	0.0832948		n.s.
A0A087X1Z3;Q9UL46;H0YM70;H0YKU2	A0A087X1Z3;Q9UL46;H0YM70	PSME2	30.9545	0.00899348	0.000196758	0.377339	AvC_do	AvM_do	n.s.	-0.346241	-0.543181	0.19694	AS specific	changed in MR
A0A087X232;P09871;F8WCZ6;H0Y5D1;F5H7T4;B5MCV4	A0A087X232;P09871;F8WCZ6	C1S	26.8105	5.88709e-05	0.156659	2.81353e-05	AvC_up	n.s.	MvC_up	2.03425	-0.762745	2.797	shared	n.s.
A0A087X256;Q2M389;Q2M389-2;F8W1W1;F8VYH7;F8VNZ5	A0A087X256;Q2M389;Q2M389-2	WASHC4	27.0424	0.0004785	0.0290196	0.509558	AvC_do	AvM_do	n.s.	-1.1723	-0.776701	-0.395598	AS specific	changed in MR
A0A087X279;P09913	A0A087X279;P09913	IFIT2	30.7365	0.0131118	0.3908	0.367605	AvC_up	n.s.	n.s.	1.95637	0.764831	1.19154		n.s.
A0A087X2D5;Q9BRJ2;A0A0G2JMS5;A0A087WU62	A0A087X2D5;Q9BRJ2;A0A0G2JMS5;A0A087WU62	MRPL45	27.2429	0.00566435	0.030279	0.842045	AvC_do	AvM_do	n.s.	-0.694261	-0.581448	-0.112813	AS specific	changed in MR
A0A087X2H1;Q9ULT8;H0YJP0;G3V4V5;H0YJD4;A0A087WVU6;H0YJV8	A0A087X2H1;Q9ULT8;H0YJP0;G3V4V5	HECTD1	26.1402	0.984367	0.844681	0.905886	n.s.	n.s.	n.s.	-0.0128931	0.118066	-0.130959		n.s.
A0A087X2I1;P62333;H0YJC0;H0YJS8;H0YJX2;H0YJE9;H0YJT1	A0A087X2I1;P62333	PSMC6	30.7253	0.0618632	0.0871348	0.979779	n.s.	n.s.	n.s.	-0.260311	-0.252552	-0.00775889		n.s.
A0A096LPE2;P35542;A0A3B3ISW8;E9PR14;G3V1D9;P0DJI9-2	A0A096LPE2;P35542	SAA2-SAA4	26.522	0.115007	0.544412	0.641589	n.s.	n.s.	n.s.	0.787367	0.350069	0.437298		n.s.
A0A096LPJ4;A0A096LNZ9	A0A096LPJ4;A0A096LNZ9	ISG15	26.6448	0.28481	0.783059	0.383455	n.s.	n.s.	n.s.	0.567788	-0.17537	0.743158		n.s.
A0A0A0MQS6;Q9H251-4;Q9H251-2;Q9H251;Q9H251-8;A0A087X097;Q9H251-3;Q9H251-9;Q9H251-7	A0A0A0MQS6;Q9H251-4;Q9H251-2;Q9H251;Q9H251-8;A0A087X097;Q9H251-3	CDH23	25.1818	0.463855	0.671711	0.904786	n.s.	n.s.	n.s.	0.58352	0.379825	0.203695		n.s.
A0A0A0MTC7;A0A0A0MQS9;Q16363-2;Q16363;E5RFQ2;H0Y351;H0YAQ5;H0YAP9;E5RK79;E5RFD7;E5RHF3;Q6LET9;Q16363-3	A0A0A0MTC7;A0A0A0MQS9;Q16363-2;Q16363	LAMA4	32.2851	0.316295	0.00399787	0.194201	n.s.	AvM_do	n.s.	-0.10689	-0.309957	0.203067		changed in MR
A0A0A0MQU4;Q96I15;Q96I15-2;H7C3V9;H7C277;H7C1N7;H7C1S7;C9JNL5;H7C4A1;H7C280;F8WCL3;F8WBU3;H7C2M1	A0A0A0MQU4;Q96I15;Q96I15-2;H7C3V9;H7C277	SCLY	25.5333	0.162308	0.24524	0.950559	n.s.	n.s.	n.s.	-0.774808	-0.686994	-0.0878139		n.s.
C9JP00;A0A0A0MQX8;Q9NR56;Q9NR56-7;Q86VM6;C9JCX1;H7C4Y1;Q9NUK0-2	C9JP00;A0A0A0MQX8;Q9NR56;Q9NR56-7;Q86VM6	MBNL1	24.5179	0.897205	0.266788	0.570236	n.s.	n.s.	n.s.	-0.0708341	-0.51983	0.448996		n.s.
A0A0A0MQZ4;Q8N3J5;V9GY69;V9GYZ5;Q8N3J5-2;V9GYS8;Q8N3J5-3;V9GYI6	A0A0A0MQZ4;Q8N3J5;V9GY69	PPM1K	28.2107	0.0902314	0.024432	0.744616	n.s.	AvM_do	n.s.	-0.530934	-0.739848	0.208914		changed in MR
A0A0A0MR85;Q03013-2;Q03013;A6NNT0;A0A1W2PNX1	A0A0A0MR85;Q03013-2;Q03013	GSTM4	26.8735	0.952635	0.71835	0.877658	n.s.	n.s.	n.s.	-0.0557535	-0.323225	0.267471		n.s.
A0A0A0MRA3;Q8WZ42-9;Q8WZ42-3;Q8WZ42-10;A0A0U1RRH3;C9JQJ2;REV__P61225	A0A0A0MRA3;Q8WZ42-9;Q8WZ42-3;Q8WZ42-10	TTN	29.0434	0.0209364	0.00290249	0.653545	AvC_up	AvM_up	n.s.	0.702515	0.966731	-0.264216	AS specific	changed in AS
A0A0A0MRA5;B7Z4B8;Q9BUJ2-4;Q9BUJ2-2;Q9BUJ2;Q9BUJ2-3;M0R3F1;M0QYZ0;M0R203;M0QZV6;M0R0K8;M0QYI8;M0QYM5;Q9BUJ2-5	A0A0A0MRA5;B7Z4B8;Q9BUJ2-4;Q9BUJ2-2;Q9BUJ2;Q9BUJ2-3;M0R3F1;M0QYZ0	HNRNPUL1	26.6111	0.193984	0.00656876	0.352498	n.s.	AvM_do	n.s.	-0.347687	-0.748589	0.400902		changed in MR
A0A0A0MRJ6;H7BY58;P22061;P22061-2;F6S8N6;A0A3F2YNX8;C9J0F2;F8WDT3;F8WAV5;F8WAX2;H7C4X2	A0A0A0MRJ6;H7BY58;P22061;P22061-2;F6S8N6;A0A3F2YNX8	PCMT1	32.8227	0.0641148	0.00261236	0.434643	n.s.	AvM_up	n.s.	0.225944	0.388669	-0.162725		changed in AS
A0A0A0MRM2	A0A0A0MRM2	NRAP	24.8176	0.0158013	0.750511	0.189299	AvC_do	n.s.	n.s.	-0.945548	-0.155433	-0.790116		n.s.
A0A0A0MRN9;Q5T457	A0A0A0MRN9;Q5T457	ANKRD2	25.6106	0.165741	0.489767	0.772842	n.s.	n.s.	n.s.	-0.869009	-0.491942	-0.377067		n.s.
A0A0A0MRR5;Q96BW1;Q96BW1-3;E9PSD7;F8W6E9;Q96BW1-2	A0A0A0MRR5;Q96BW1;Q96BW1-3;E9PSD7	UPRT	25.9079	0.591533	0.538709	0.963994	n.s.	n.s.	n.s.	0.495341	0.598366	-0.103025		n.s.
A0A0A0MRR7;P09234	A0A0A0MRR7;P09234	SNRPC	26.2757	0.10107	0.770634	0.45924	n.s.	n.s.	n.s.	-0.732462	-0.161147	-0.571315		n.s.
A0A0A0MRT6;Q8IZP0-2;Q8IZP0-4;Q8IZP0-3;Q8IZP0-5;Q8IZP0-6;Q8IZP0-9;Q8IZP0;B6VEX4;Q8IZP0-10;Q8IZP0-8;Q8IZP0-7;Q8IZP0-12;Q8IZP0-11	A0A0A0MRT6;Q8IZP0-2;Q8IZP0-4;Q8IZP0-3;Q8IZP0-5;Q8IZP0-6;Q8IZP0-9;Q8IZP0;B6VEX4;Q8IZP0-10;Q8IZP0-8;Q8IZP0-7;Q8IZP0-12;Q8IZP0-11	ABI1	26.5922	0.122715	0.777268	0.495657	n.s.	n.s.	n.s.	-1.12308	-0.253274	-0.869806		n.s.
A0A0A0MRZ8;P04433	A0A0A0MRZ8;P04433	IGKV3D-11	28.0426	0.128218	0.859804	0.444189	n.s.	n.s.	n.s.	0.868934	0.124086	0.744848		n.s.
A0A0A0MS41;Q9BWM7;A0A1P0AYU5;S4R3N9	A0A0A0MS41;Q9BWM7;A0A1P0AYU5;S4R3N9	SFXN3	28.7219	0.689753	0.733556	0.985859	n.s.	n.s.	n.s.	0.12146	0.110348	0.0111127		n.s.
A0A0A0MS51;A0A0A0MT01;P06396-4;Q5T0H8;REV__H0YJM7	A0A0A0MS51;A0A0A0MT01;P06396-4	GSN	28.3396	0.00213783	0.167797	0.338552	AvC_do	n.s.	n.s.	-1.25883	-0.61105	-0.647778		n.s.
A0A0A0MSA4	A0A0A0MSA4	EPB41L3	24.6321	0.15265	0.0736043	0.842045	n.s.	n.s.	n.s.	-0.582645	-0.760981	0.178336		n.s.
A0A0A0MSB8;Q9UPT5-6;Q9UPT5;Q9UPT5-5;Q9UPT5-1;Q9UPT5-2;A0A0A0MRE1;Q9UPT5-4;B5MCY9;K7ERQ5;C9JME6;C9JKC2	A0A0A0MSB8;Q9UPT5-6;Q9UPT5;Q9UPT5-5;Q9UPT5-1;Q9UPT5-2;A0A0A0MRE1	EXOC7	26.4867	0.15356	0.0125222	0.505742	n.s.	AvM_do	n.s.	-0.5419	-0.983179	0.441278		changed in MR
J3KNW4;A0A0A0MSG2;Q14192;F8WDA8;U3KQT4;Q14192-2;C9J3S8	J3KNW4;A0A0A0MSG2;Q14192	FHL2	33.2261	0.726893	0.302847	0.351092	n.s.	n.s.	n.s.	-0.109065	0.305675	-0.41474		n.s.
A0A0A0MSS8;P42330;S4R3Z2;S4R3D5;P17516	A0A0A0MSS8;P42330;S4R3Z2;S4R3D5	AKR1C3	29.1613	0.121724	0.893139	0.270426	n.s.	n.s.	n.s.	0.456478	-0.0505551	0.507033		n.s.
A0A0G2JKZ1;A0A0A0MSV9;O15533-2;O15533;O15533-3;A2AB90;A0A0G2JH37;Q6P1N7;C9JA35;A0A0A0MT98;O15533-4;A0A140T9B2;A0A0G2JJI5	A0A0G2JKZ1;A0A0A0MSV9;O15533-2;O15533;O15533-3;A2AB90;A0A0G2JH37;Q6P1N7	TAPBP	25.2848	0.348414	0.749186	0.78233	n.s.	n.s.	n.s.	-0.438137	-0.175834	-0.262303		n.s.
A0A0A0MT83;P26440;P26440-2;H7C4G6;H0YLC3;H0YKV0;H0YN10;A0A087WVD3	A0A0A0MT83;P26440;P26440-2;H7C4G6	IVD	31.9987	0.657755	0.9922	0.81165	n.s.	n.s.	n.s.	-0.066812	0.0016939	-0.0685059		n.s.
A0A0A0MTH3;Q13418;Q13418-2;Q13418-3;E9PQ52;A0A087WW45	A0A0A0MTH3;Q13418;Q13418-2;Q13418-3	ILK	31.8834	0.213475	0.139703	0.897007	n.s.	n.s.	n.s.	-0.165901	-0.204919	0.0390182		n.s.
A0A0A0MTN0;Q13617;Q13617-2;Q5T2B5;Q5T2B7	A0A0A0MTN0;Q13617;Q13617-2;Q5T2B5	CUL2	27.9726	0.0641148	0.0161944	0.738931	n.s.	AvM_do	n.s.	-0.539881	-0.737837	0.197956		changed in MR
A0A0A0MTS7;Q8WZ42-12;H7C195	A0A0A0MTS7;Q8WZ42-12	TTN	40.7018	0.535467	0.400629	0.315252	n.s.	n.s.	n.s.	-0.0723836	0.101177	-0.17356		n.s.
A0A0A6YYH1;Q7Z6K5-2;Q7Z6K5;H0YMP5;H0YL03;H0YMK0;H0YL85	A0A0A6YYH1;Q7Z6K5-2;Q7Z6K5	C15orf38-AP3S2	24.1931	0.322952	0.757835	0.401635	n.s.	n.s.	n.s.	0.332863	-0.123443	0.456307		n.s.
A0A0A6YYJ8;Q96HJ9-2;Q9Y383-3;A8MYV2;Q9NQ29-3;B8ZZ10;B8ZZ12;B8ZZ09	A0A0A6YYJ8;Q96HJ9-2;Q9Y383-3	LUC7L2	28.3148	0.920522	0.662393	0.752139	n.s.	n.s.	n.s.	-0.0275953	0.115724	-0.143319		n.s.
A0A0A6YYL2;P0DMN0;P0DMM9;P0DMM9-3;P0DMM9-2;H3BPL6;H3BNY7;H3BRT0	A0A0A6YYL2;P0DMN0;P0DMM9;P0DMM9-3;P0DMM9-2	SULT1A4	27.9251	0.0047545	0.0993074	0.571064	AvC_do	n.s.	n.s.	-1.05243	-0.660017	-0.392413		n.s.
A0A0A6YYL4;P57737-3;P57737-4;P57737;P57737-2;I3L167;I3L3T0;Q9Y3D7;I3L1U7;E7EP81;I3L442;I3L359;I3L426;I3L2Y6;I3L1M1;I3NI06;I3L212;I3L1G9;A0A0B4J298;I3L351;I3L0X8	A0A0A6YYL4;P57737-3;P57737-4;P57737;P57737-2	CORO7-PAM16	27.6891	0.0983476	0.54911	0.603921	n.s.	n.s.	n.s.	-0.579194	-0.243838	-0.335356		n.s.
A0A0B4J1R2;Q9H6R3;Q9H6R3-2;F8VZB4;H0YII9	A0A0B4J1R2;Q9H6R3;Q9H6R3-2	ACSS3	29.149	9.01241e-10	0.000487344	0.0293683	AvC_do	AvM_do	MvC_do	-1.53588	-0.850212	-0.685664	shared	changed in MR
A0A0B4J1X5;A0A0C4DH42;A0A075B7E8;P01767;A0A0J9YVY3	A0A0B4J1X5;A0A0C4DH42;A0A075B7E8;P01767	IGHV3-74	27.0066	0.596463	0.109062	0.5335	n.s.	n.s.	n.s.	-0.374451	-1.08724	0.712786		n.s.
A0A0B4J1Z1;C9JAB2;Q16629-3;Q16629-2;Q16629-4;Q16629;F8WEA1	A0A0B4J1Z1;C9JAB2;Q16629-3;Q16629-2;Q16629-4;Q16629	SRSF7	27.3634	0.731399	0.0453681	0.273411	n.s.	AvM_do	n.s.	-0.127125	-0.680174	0.553048		changed in MR
A0A0B4J231;B9A064;P0CG04	A0A0B4J231;B9A064;P0CG04	IGLL5	31.9574	0.00138177	0.494551	0.00282221	AvC_up	n.s.	MvC_up	1.26919	-0.316161	1.58535	shared	n.s.
Q5W0H4;A0A0B4J2C3;P13693;J3KPG2;E9PJF7;P13693-2;H0YCX0;Q56UQ5;Q9HAU6	Q5W0H4;A0A0B4J2C3;P13693;J3KPG2;E9PJF7;P13693-2	TPT1	30.5053	0.0308493	0.545257	0.391315	AvC_do	n.s.	n.s.	-0.444269	-0.146286	-0.297983		n.s.
A0A0C4DFM0;G3V5T0;G3V4T6;A0A0A0MR33;G3V267;O43708-2;G3V3B9;G3V5U6;G3V5G8;H0YJN8	A0A0C4DFM0;G3V5T0;G3V4T6;A0A0A0MR33;G3V267;O43708-2	GSTZ1	29.037	0.994755	0.224781	0.451486	n.s.	n.s.	n.s.	-0.00292481	-0.403761	0.400836		n.s.
A0A0C4DFN3;Q99685;Q99685-2;A0A3B3ITT3;E7EWX8;H7C599;H7C5K5;C9J8Q3;C9JAM4	A0A0C4DFN3;Q99685;Q99685-2;A0A3B3ITT3;E7EWX8;H7C599	MGLL	29.0783	4.64573e-05	0.00185989	0.680143	AvC_do	AvM_do	n.s.	-1.38653	-1.1161	-0.270427	AS specific	changed in MR
A0A0C4DFT3;Q12959-4;Q12959-2;Q12959-5;Q12959-3;Q12959-6;Q12959;Q12959-7;Q12959-8;Q12959-9;E7EQD7;B4E2H8;H7C166;C9IYP1;C9JCP6;A8MUT6;C9JUA9;C9J110;F2Z2L0;A8MUT9	A0A0C4DFT3;Q12959-4;Q12959-2;Q12959-5;Q12959-3;Q12959-6;Q12959;Q12959-7;Q12959-8;Q12959-9;E7EQD7	DLG1	25.4013	0.359308	0.274745	0.922732	n.s.	n.s.	n.s.	0.357045	0.440668	-0.0836233		n.s.
A0A0C4DFZ2;P15289-2;P15289	A0A0C4DFZ2;P15289-2;P15289	ARSA	25.0541	0.0898621	0.224708	0.862804	n.s.	n.s.	n.s.	0.770797	0.593386	0.177411		n.s.
A0A0C4DGA7;A0A0A0MRD5;O94929-4;D6RHE7	A0A0C4DGA7	ABLIM3	28.8945	0.0892062	0.809696	0.403378	n.s.	n.s.	n.s.	0.45532	0.0799165	0.375403		n.s.
A0A0C4DGB0;Q9UIL1-2;Q9UIL1;Q9UIL1-3	A0A0C4DGB0;Q9UIL1-2;Q9UIL1;Q9UIL1-3	SCOC	24.6802	0.56265	0.16671	0.157559	n.s.	n.s.	n.s.	-0.299134	0.6958	-0.994934		n.s.
A0A0C4DGB9	A0A0C4DGB9	PPA2	24.4077	0.556325	0.214707	0.735486	n.s.	n.s.	n.s.	0.202864	0.420872	-0.218008		n.s.
A0A0C4DGJ8;Q6IPR1;G3V521	A0A0C4DGJ8;Q6IPR1	ETFRF1	26.5322	0.00158749	0.0454098	0.583969	AvC_do	AvM_do	n.s.	-1.19419	-0.809773	-0.384413	AS specific	changed in MR
A0A0C4DGQ5;P04632;K7ELJ7;K7EM73;A0A075B7C0;K7EKD8;U3KQE2;K7EIV0;U3KPR7;K7ES78;K7EMQ1	A0A0C4DGQ5;P04632;K7ELJ7;K7EM73;A0A075B7C0;K7EKD8;U3KQE2;K7EIV0	CAPNS1	31.5912	0.753383	0.211209	0.594706	n.s.	n.s.	n.s.	-0.0403329	-0.148571	0.108238		n.s.
A0A0C4DGQ8;Q6IAN0;J3KRS1;J3QKT1;J3QLJ8;J3QLK1	A0A0C4DGQ8;Q6IAN0	DHRS7B	28.1244	5.29012e-05	0.0305978	0.255477	AvC_do	AvM_do	n.s.	-0.589927	-0.331245	-0.258682	AS specific	changed in MR
A0A0C4DGS0;A0A2Y9D025;P56556;R4GN43	A0A0C4DGS0;A0A2Y9D025;P56556;R4GN43	NDUFA6	32.7607	0.464677	0.752484	0.505742	n.s.	n.s.	n.s.	-0.123939	0.06139	-0.185329		n.s.
A0A0C4DGS1;P39656;P39656-3;P39656-2;U3KQ84	A0A0C4DGS1;P39656;P39656-3;P39656-2	DDOST	30.531	0.0050658	0.348933	0.272651	AvC_do	n.s.	n.s.	-0.314456	-0.117927	-0.196529		n.s.
A0A0C4DH31	A0A0C4DH31	IGHV1-18	24.398	0.122578	0.0545386	0.00692632	n.s.	n.s.	MvC_up	0.750556	-0.978834	1.72939		n.s.
A0A0C4DH38	A0A0C4DH38	IGHV5-51	25.6698	0.257513	0.490473	0.199433	n.s.	n.s.	n.s.	0.662381	-0.45108	1.11346		n.s.
A0A0C4DH72	A0A0C4DH72	IGKV1-6	24.3332	0.518697	0.016911	0.0172993	n.s.	AvM_do	MvC_up	0.312295	-1.11674	1.42904	MR sepcific	changed in MR
A0A0D9SEI0;Q9P0P8	A0A0D9SEI0;Q9P0P8	C6orf203	26.6488	0.285185	0.905001	0.470357	n.s.	n.s.	n.s.	-0.36584	0.0502907	-0.416131		n.s.
Q5T321;A0A0D9SF28;F5GXV7;Q8NFP9;Q8NFP9-3;Q8NFP9-2	Q5T321;A0A0D9SF28;F5GXV7;Q8NFP9	NBEA	29.0428	0.00025145	5.35557e-06	0.387544	AvC_up	AvM_up	n.s.	1.52477	2.12773	-0.602969	AS specific	changed in AS
A0A0D9SFB3;A0A2R8YF78;A0A0D9SG12;A0A2R8YFS5;A0A2R8Y4A4;A0A0D9SF53;O00571;A0A2R8Y5G6;O00571-2;F6S8Q4;A0A2R8YDT5;A0A2R8Y7T2;A0A2R8YDH3;A0A0J9YVQ7;A0A087WVZ1;A0A2R8YCU0;A0A2R8Y650;A0A087WX09;A0A2R8Y4D2;D6RCM4;Q9NQI0-3;Q9NQI0-2;Q9NQI0-4;Q9NQI0;A0A2R8Y770;H0Y960	A0A0D9SFB3;A0A2R8YF78;A0A0D9SG12;A0A2R8YFS5;A0A2R8Y4A4;A0A0D9SF53;O00571;A0A2R8Y5G6;O00571-2;F6S8Q4;A0A2R8YDT5;A0A2R8Y7T2;A0A2R8YDH3	DDX3X	30.8808	1.09559e-05	0.0269423	0.152772	AvC_do	AvM_do	n.s.	-0.430346	-0.224375	-0.20597	AS specific	changed in MR
A0A0D9SF54;A0A0D9SFF6;A0A0D9SFH4;A0A1B0GTB7;A0A1B0GV13;A0A1B0GW19;A0A1B0GWE2;A0A1B0GUH3	A0A0D9SF54	SPTAN1	28.356	0.855183	0.98382	0.935755	n.s.	n.s.	n.s.	-0.0770657	-0.00866217	-0.0684035		n.s.
A0A0D9SFK2;Q92614-4;Q92614;Q92614-3;Q92614-2;Q92614-5;H0YEV9	A0A0D9SFK2;Q92614-4;Q92614;Q92614-3;Q92614-2;Q92614-5	MYO18A	30.5686	0.603349	0.0152722	0.195534	n.s.	AvM_do	n.s.	-0.0999061	-0.441736	0.34183		changed in MR
A0A0D9SG72;P61764;A0A1B0GWF2;A0A1B0GVQ5;A0A2R8Y5D4;A0A1B0GTP9;P61764-2;A0A1B0GW76;A0A0D9SFQ7;A0A0D9SFW6;A0A0D9SEP9;A0A0D9SEH5;A0A096LP52;A0A096LP33;A0A1B0GVV9	A0A0D9SG72;P61764;A0A1B0GWF2;A0A1B0GVQ5;A0A2R8Y5D4;A0A1B0GTP9;P61764-2;A0A1B0GW76	STXBP1	26.918	0.457984	0.334482	0.2299	n.s.	n.s.	n.s.	0.239823	-0.319715	0.559537		n.s.
A0A0D9SGF6	A0A0D9SGF6	SPTAN1	35.9634	0.0175313	0.00689354	8.10985e-05	AvC_up	AvM_do	MvC_up	0.132849	-0.159899	0.292748	shared	changed in MR
A0A0G2JH68;O60610;A0A140T8Z0;O60610-2;O60610-3;A0A2R8Y5N1;B4E2I7;A0A2R8YEF8	A0A0G2JH68;O60610;A0A140T8Z0;O60610-2;O60610-3;A0A2R8Y5N1	DIAPH1	26.6165	0.853258	0.851608	0.837021	n.s.	n.s.	n.s.	-0.0972869	0.0998514	-0.197138		n.s.
A0A0G2JIW1;P0DMV9;P0DMV8;P0DMV8-2;V9GZ37	A0A0G2JIW1;P0DMV9;P0DMV8;P0DMV8-2;V9GZ37	HSPA1B	35.3635	0.015693	0.715215	0.0424813	AvC_do	n.s.	MvC_do	-0.217506	0.0398362	-0.257342	shared	n.s.
A0A0G2JJD3;O95870;O95870-2;A0A0G2JI89;F2Z3H2;F2Z3G6	A0A0G2JJD3;O95870;O95870-2	ABHD16A	27.8129	0.0532967	0.152522	0.860856	n.s.	n.s.	n.s.	-0.46698	-0.369467	-0.0975129		n.s.
A0A182DWF4;A0A0G2JJV3;Q5EP54;A0A182DWG2;A0A140T9A5;A0A140T966;A0A182DWF5;A0A140T9Q1;A0A140T928	A0A182DWF4;A0A0G2JJV3;Q5EP54;A0A182DWG2;A0A140T9A5;A0A140T966;A0A182DWF5;A0A140T9Q1;A0A140T928	HLA-DPB1	24.7997	0.0767225	0.113894	0.969822	n.s.	n.s.	n.s.	-0.830471	-0.787527	-0.0429448		n.s.
A0A0G2JMH6;P01903;Q30118;A0A0G2JH46	A0A0G2JMH6;P01903;Q30118;A0A0G2JH46	HLA-DRA	28.5567	0.122833	0.00901861	0.505741	n.s.	AvM_do	n.s.	-0.45639	-0.802681	0.346291		changed in MR
A0A0G2JNW7;Q9Y666;A0A0G2JQE3;H0YB78;Q9Y666-2	A0A0G2JNW7;Q9Y666;A0A0G2JQE3;H0YB78	SLC12A7	24.7102	0.623996	0.126748	0.146086	n.s.	n.s.	n.s.	-0.208472	0.619634	-0.828106		n.s.
E9PNT2;E9PIR1;A0A0G2JRG8;A0A0G2JNY3;Q6ZUM4-2;Q6ZUM4;A0A0C4DGE6;Q6ZUM4-3;E9PNX6	E9PNT2;E9PIR1;A0A0G2JRG8;A0A0G2JNY3;Q6ZUM4-2;Q6ZUM4;A0A0C4DGE6;Q6ZUM4-3	ARHGAP27	26.7165	0.974064	0.421576	0.650177	n.s.	n.s.	n.s.	0.0503206	1.08915	-1.03883		n.s.
A0A0G2JNZ2;A0A0G2JPP5;Q14160;Q14160-3;A0A0G2JMS7;Q14160-2;H0YCG0;H0YDF9	A0A0G2JNZ2;A0A0G2JPP5;Q14160;Q14160-3;A0A0G2JMS7;Q14160-2	SCRIB	25.8279	0.868945	0.996147	0.935755	n.s.	n.s.	n.s.	-0.125756	-0.00345977	-0.122297		n.s.
A0A0J9YX62;O75190-3;C9J2C4;C9J2P2;C9JDX6;F8WCZ4;C9JDR7;C9JB42;C9JN01;Q8WWF6;Q8NHS0;Q7Z6W7	A0A0J9YX62;O75190-3;C9J2C4;C9J2P2	DNAJB6	29.5058	0.164199	0.0685314	0.81165	n.s.	n.s.	n.s.	-0.137463	-0.187409	0.0499464		n.s.
J3QT77;A0A0J9YYG4;A0A0J9YXF2;Q15165-3;Q15165-1;Q15165;G3XAK4;A0A0J9YYJ1;A0A0J9YXU7;A0A2Q2SAK4;A0A0J9YXM1	J3QT77;A0A0J9YYG4;A0A0J9YXF2;Q15165-3;Q15165-1;Q15165;G3XAK4	PON2	27.4195	0.694892	0.328969	0.764426	n.s.	n.s.	n.s.	-0.166693	-0.399657	0.232963		n.s.
E9PC62;A0A0J9YXJ0;V9GYD9;Q5VZZ6;A0A0J9YX66;A0A1B0GU44;A0A1B0GUN8;O95319-5;O95319-2;O95319;O95319-4;O95319-3;V9GY47;A0A0J9YXK1	E9PC62;A0A0J9YXJ0;V9GYD9;Q5VZZ6;A0A0J9YX66;A0A1B0GU44;A0A1B0GUN8;O95319-5;O95319-2;O95319;O95319-4;O95319-3	CELF2	25.6743	0.0187108	0.142837	0.695866	AvC_do	n.s.	n.s.	-1.06244	-0.711358	-0.351078		n.s.
A0A0J9YXN7;Q96Q06	A0A0J9YXN7;Q96Q06	PLIN4	27.8523	0.0165483	0.0844799	0.799959	AvC_do	n.s.	n.s.	-0.974469	-0.750224	-0.224244		n.s.
A0A0J9YYF7;Q86T65-4;Q86T65;A0A0J9YX09;F2Z2Q2	A0A0J9YYF7;Q86T65-4;Q86T65	DAAM2	24.9649	0.0714247	0.540365	0.545175	n.s.	n.s.	n.s.	0.848435	0.335247	0.513188		n.s.
A0A0R4J2G3;Q6PIU2;A0A0A0MTJ9;Q6PIU2-2;Q6PIU2-3;H7C046;F8WE33	A0A0R4J2G3;Q6PIU2;A0A0A0MTJ9;Q6PIU2-2;Q6PIU2-3;H7C046	NCEH1	31.1226	0.0168069	0.0345976	0.959304	AvC_do	AvM_do	n.s.	-0.354945	-0.334395	-0.0205497	AS specific	changed in MR
A0A3B3ISJ1;A0A0S2Z4L3;P07225;G5E9F8;A0A3B3IRK9;H7BXT0;A0A3B3IUA6;C9K0R0;A0A3B3ITZ7	A0A3B3ISJ1;A0A0S2Z4L3;P07225;G5E9F8;A0A3B3IRK9	PROS1	26.7042	0.00518389	0.438917	0.223717	AvC_up	n.s.	n.s.	1.53839	0.489282	1.0491		n.s.
A0A0U1RQK4;Q8NDY3;Q8NDY3-2;X6RL45	A0A0U1RQK4	ADPRHL1	33.2306	0.469445	0.224584	0.806221	n.s.	n.s.	n.s.	0.0999835	0.168454	-0.0684709		n.s.
A0A0U1RQQ9;Q6P3W7;F8VSC5;H0YI32;H0YIK6	A0A0U1RQQ9;Q6P3W7;F8VSC5	SCYL2	24.7005	0.468227	0.347757	0.908781	n.s.	n.s.	n.s.	-0.339663	-0.452346	0.112683		n.s.
A0A0U1RQW6;Q9Y2E4-2;H0Y5A8;H0Y7Q3	A0A0U1RQW6	DIP2C	25.974	0.181589	0.77331	0.584941	n.s.	n.s.	n.s.	-0.541132	-0.142937	-0.398194		n.s.
A0A0U1RR32;A0A0U1RRH7;P20671;Q99878;Q96KK5;Q9BTM1;P0C0S8;Q7L7L0;P04908;H0YFX9;A0A3B3IS11;Q93077;Q9BTM1-2	A0A0U1RR32;A0A0U1RRH7;P20671;Q99878;Q96KK5;Q9BTM1;P0C0S8;Q7L7L0;P04908;H0YFX9;A0A3B3IS11;Q93077;Q9BTM1-2	hCG_2039566	33.7448	0.0083792	0.000212452	0.399813	AvC_do	AvM_do	n.s.	-0.445055	-0.686822	0.241767	AS specific	changed in MR
A0A0U1RRB6;Q9Y2D4;J3QT38;Q9Y2D4-2;F8W6R7	A0A0U1RRB6;Q9Y2D4;J3QT38;Q9Y2D4-2	EXOC6B	26.9582	0.0574029	0.0138354	0.735486	n.s.	AvM_do	n.s.	-0.621136	-0.847437	0.2263		changed in MR
A0A0U1RRL8;Q8TB22;Q8TB22-2;Q8TB22-3;Q8TB22-4;H0Y9W3	A0A0U1RRL8;Q8TB22;Q8TB22-2;Q8TB22-3;Q8TB22-4	SPATA20	29.6644	0.420021	0.959937	0.622771	n.s.	n.s.	n.s.	-0.249127	0.0179999	-0.267127		n.s.
O19617;A2AEA2;A0A140T9H5;P10321;A0A140T921;A0A140T9U8;A0A1W2PRU9	O19617;A2AEA2;A0A140T9H5;P10321;A0A140T921;A0A140T9U8;A0A1W2PRU9	HLA-C	25.2876	0.438966	0.675592	0.433897	n.s.	n.s.	n.s.	0.397865	-0.241669	0.639534		n.s.
A0A140T9J9;Q29963;A0A1W2PR11;A0A140T962;A0A140T9B3;A0A1W2PRX1;A0A1W2PP77;A0A140TA05;A0A140T9L3;A0A140T9E1;F8W9Z8;A0A140TA12;Q31611;A0A0G2JNX1;P17693-6;P17693-2;A0A0G2JPT2	A0A140T9J9;Q29963;A0A1W2PR11;A0A140T962;A0A140T9B3;A0A1W2PRX1;A0A1W2PP77	HLA-C	24.7023	0.73356	0.671711	0.965161	n.s.	n.s.	n.s.	0.214971	0.280263	-0.0652921		n.s.
A0A140T9T7;Q03518;A0A0S2Z4R8	A0A140T9T7;Q03518	TAP1	24.961	0.0993729	0.213073	0.893097	n.s.	n.s.	n.s.	-0.736654	-0.5975	-0.139154		n.s.
A0A140TA41;A0A140T9C0;P22105-1;P22105;P22105-4;A0A140T8Z8;A0A140T956;A0A140T9L7;A0A087X0I0;P22105-2	A0A140TA41;A0A140T9C0;P22105-1;P22105;P22105-4;A0A140T8Z8;A0A140T956	TNXB	25.2008	0.0743701	0.910461	0.207637	n.s.	n.s.	n.s.	0.944467	-0.0758338	1.0203		n.s.
A0A140TA86;Q5XKP0;K7EIR2;A0A140TA84	A0A140TA86;Q5XKP0;K7EIR2;A0A140TA84	C19orf70	30.8365	0.000394745	0.0923498	0.267544	AvC_do	n.s.	n.s.	-0.614734	-0.310654	-0.30408		n.s.
A0A182DWF2;A0A182DWF3;Q9NNW7-2;Q9NNW7;D3YTF8;A0A096LPK7;Q9NNW7-3;Q9NNW7-4;A0A096LPD9;E7EWK1;A0A096LNY7	A0A182DWF2;A0A182DWF3;Q9NNW7-2;Q9NNW7;D3YTF8;A0A096LPK7;Q9NNW7-3;Q9NNW7-4;A0A096LPD9;E7EWK1	TXNRD2	30.7241	0.307221	0.627398	0.306652	n.s.	n.s.	n.s.	-0.148673	0.0808671	-0.22954		n.s.
A0A182DWI3;Q16881-6;F8W809;A0A087WSW9;A0A087WSY9;Q16881-5;Q16881-2;Q16881-4;Q16881-3;Q16881;E9PIR7;E2QRB9;Q16881-7;E9PKD3;A0A0B4J225;E9PIZ5;E9PLT3;E9PKI4;E9PQI3;E9PJU2;E9PRI8	A0A182DWI3;Q16881-6;F8W809;A0A087WSW9;A0A087WSY9;Q16881-5;Q16881-2;Q16881-4;Q16881-3;Q16881;E9PIR7;E2QRB9;Q16881-7	TXNRD1	31.5289	0.0219516	0.285336	0.543104	AvC_up	n.s.	n.s.	0.288733	0.148625	0.140108		n.s.
A0A1B0GTC3;A0A1B0GVH5;Q9C0B1;A0A1B0GUC3;A0A1B0GV98;A0A1B0GTC5;A0A1B0GU26;A0A1B0GTY1;A0A1B0GUY7;A0A1B0GTI3;Q9C0B1-4;Q9C0B1-2;A0A1B0GTZ8;Q9C0B1-3;F8WCB8	A0A1B0GTC3;A0A1B0GVH5;Q9C0B1;A0A1B0GUC3;A0A1B0GV98;A0A1B0GTC5;A0A1B0GU26;A0A1B0GTY1	FTO	25.3598	0.0372984	0.187152	0.752633	AvC_do	n.s.	n.s.	-0.865553	-0.593324	-0.272228		n.s.
A0A1B0GWJ0;A0A1B0GTJ7;P30566;A0A0A6YY92;P30566-2;A0A096LNY6;A0A1B0GWF8;A0A1B0GTG9;A0A096LNY5;A0A096LPA2;A0A096LP92;A0A096LNY4;A0A096LP76;B4DEP1;A0A096LP72;V9GY96;A0A1W2PRX2;A0A096LNT0	A0A1B0GWJ0;A0A1B0GTJ7;P30566;A0A0A6YY92;P30566-2;A0A096LNY6;A0A1B0GWF8;A0A1B0GTG9	ADSL	29.589	0.0351343	0.125001	0.836109	AvC_do	n.s.	n.s.	-0.273244	-0.213283	-0.0599612		n.s.
A0A1B0GTL5;Q9BXF6	A0A1B0GTL5;Q9BXF6	RAB11FIP5	25.1496	0.000861248	0.0637001	0.431677	AvC_up	n.s.	n.s.	1.11895	0.664229	0.454718		n.s.
A0A1B0GW68;A0A1B0GUA4;A0A1B0GTM3;Q13510;Q13510-2;E7EMM4;A0A1B0GTZ5;A0A1B0GUH5;A0A1B0GUE3;A0A1B0GUW4;A0A1B0GUG1;A0A1B0GTP7;Q13510-3;A0A1B0GVG2;A0A1B0GV06;A0A1B0GUB3;A0A1B0GU62;A0A1B0GW48;A0A1B0GVJ1;A0A1B0GVE7;A0A1B0GU06;A0A1B0GV95;A0A1B0GUJ3;A0A1B0GW66;A0A1B0GVA3;A0A1B0GV88	A0A1B0GW68;A0A1B0GUA4;A0A1B0GTM3;Q13510;Q13510-2;E7EMM4;A0A1B0GTZ5;A0A1B0GUH5;A0A1B0GUE3;A0A1B0GUW4;A0A1B0GUG1;A0A1B0GTP7;Q13510-3;A0A1B0GVG2;A0A1B0GV06;A0A1B0GUB3	ASAH1	33.4504	0.184217	0.352145	0.890829	n.s.	n.s.	n.s.	-0.174649	-0.13324	-0.041409		n.s.
A0A1B0GTU4;P49023-2;P49023-3;A0A1B0GU60;A0A1B0GV30;F5H836;A0A1B0GWE7;REV__D6RBA6	A0A1B0GTU4;P49023-2;P49023-3;A0A1B0GU60	PXN	28.2879	0.503639	0.797541	0.569829	n.s.	n.s.	n.s.	0.196276	-0.0870276	0.283304		n.s.
A0A1B0GUA3;Q96EK5;A0A0D9SFK7;A0A1B0GTE6;A0A1B0GUH6;A0A1B0GV79;A0A1B0GVY9;A0A1B0GW21;A0A1B0GU96	A0A1B0GUA3;Q96EK5	KIF1BP	27.2673	0.950737	0.928627	0.937377	n.s.	n.s.	n.s.	-0.0585015	0.08552	-0.144022		n.s.
A0A1B0GUZ7;Q14156;Q14156-3;Q14156-2;E5RJS1	A0A1B0GUZ7;Q14156;Q14156-3;Q14156-2	EFR3A	24.3031	0.00906134	0.741061	0.0309596	AvC_up	n.s.	MvC_up	1.05523	-0.166122	1.22135	shared	n.s.
A0A1B0GV18;A0A087WVP2;Q7Z6J6-2;Q7Z6J6;H0YKW6;H0Y5N1;B5MC67	A0A1B0GV18;A0A087WVP2;Q7Z6J6-2;Q7Z6J6;H0YKW6;H0Y5N1;B5MC67	FRMD5	28.0317	0.28865	0.385946	0.961276	n.s.	n.s.	n.s.	-0.352247	-0.309359	-0.0428883		n.s.
A0A1B0GVD5;A0A1B0GWE8;P07339;A0A1B0GW44;A0A1B0GV23;A0A1B0GVP3;A0A1B0GU92;A0A1B0GU03;C9JH19;H7C469;F8WD96;H7C1V0	A0A1B0GVD5;A0A1B0GWE8;P07339;A0A1B0GW44;A0A1B0GV23;A0A1B0GVP3;A0A1B0GU92;A0A1B0GU03;C9JH19;H7C469;F8WD96	CTSD	34.8935	0.529989	0.498608	0.969537	n.s.	n.s.	n.s.	0.0807645	0.0922076	-0.0114431		n.s.
A0A1B0GVY1;Q96PU5-9;Q96PU5-4;K7ERN1;K7ENS6	A0A1B0GVY1;Q96PU5-9;Q96PU5-4	NEDD4L	24.396	0.665602	0.152522	0.184813	n.s.	n.s.	n.s.	0.232801	-0.722235	0.955036		n.s.
A0A1B0GW05;Q2PZI1;H7C3M5;Q2PZI1-2;H7C1I8;Q6NUT2;F5H1L7	A0A1B0GW05;Q2PZI1	DPY19L1	25.4625	0.0155246	0.0115147	0.908822	AvC_do	AvM_do	n.s.	-0.888225	-0.983487	0.0952615	AS specific	changed in MR
A0A1B0GW50	A0A1B0GW50	ZEB2	24.532	0.943	0.641879	0.834464	n.s.	n.s.	n.s.	-0.104398	-0.635004	0.530606		n.s.
A0A1B0GW72;Q96PX9;Q96HN1	A0A1B0GW72;Q96PX9	PLEKHG4B	25.6439	0.428896	0.844681	0.776321	n.s.	n.s.	n.s.	0.52289	0.150611	0.37228		n.s.
A0A1C7CYX9;Q16555;Q16555-2;E5RFU4	A0A1C7CYX9;Q16555;Q16555-2	DPYSL2	33.4034	0.242128	0.00316905	0.00109266	n.s.	AvM_do	MvC_up	0.129675	-0.335174	0.464849	MR sepcific	changed in MR
A0A1W2PP57;A0A1W2PPC3;A0A1W2PPS0;A0A1W2PNP0;Q969N2-5;Q969N2;A0A1W2PQN1;Q969N2-4;A0A1W2PPR6;F6W983;A0A1W2PPQ7;Q969N2-2;A0A1W2PQY1;A0A1W2PRZ8;A0A1W2PR92;Q969N2-6;A0A1W2PPK4;A0A1W2PQ52;A0A1W2PP13;A0A1W2PSC5;A0A1W2PRH2;Q969N2-3;H7C2Y2;A0A1W2PPI8;A0A1W2PRG1;A0A1W2PNW9;A0A1W2PRV7;A0A1W2PRH8;A0A1W2PPU8;A0A1W2PR22;B7Z7C5;A0A1W2PP03;A0A1W2PR73;A0A1W2PNZ5;A0A1W2PNS2;A0A1W2PP98;A0A1W2PQL3;A0A1W2PR34;A0A1W2P…	A0A1W2PP57;A0A1W2PPC3;A0A1W2PPS0;A0A1W2PNP0;Q969N2-5;Q969N2;A0A1W2PQN1;Q969N2-4;A0A1W2PPR6;F6W983;A0A1W2PPQ7;Q969N2-2;A0A1W2PQY1;A0A1W2PRZ8;A0A1W2PR92;Q969N2-6	PIGT	24.5905	0.360465	0.836415	0.729499	n.s.	n.s.	n.s.	-0.373983	-0.100148	-0.273835		n.s.
A0A1W2PNR9;Q9Y5U9	A0A1W2PNR9;Q9Y5U9	IER3IP1	27.571	0.731114	0.168282	0.551047	n.s.	n.s.	n.s.	-0.138378	-0.513537	0.375159		n.s.
A0A1W2PNV4;E9PF58	A0A1W2PNV4;E9PF58	ARPC1A	28.9589	0.816328	0.00849237	0.0273471	n.s.	AvM_up	MvC_do	-0.0490425	0.490153	-0.539196	MR sepcific	changed in AS
A0A1W2PP11;Q9H300;F8WCQ4;A0A1W2PS40;C9JNP8;Q9H300-2;H7C0U0;A0A1W2PP66	A0A1W2PP11;Q9H300;F8WCQ4;A0A1W2PS40;C9JNP8;Q9H300-2;H7C0U0	PARL	25.3384	0.303659	0.207875	0.899968	n.s.	n.s.	n.s.	-0.48242	-0.613331	0.130911		n.s.
A0A1W2PPG5;A0A1W2PPP5;A0A1W2PPG1;A0A1W2PQM3;A0A1W2PS81;E7EQ34;I3NI02;O14653;O14653-2;A0A1W2PRV0;I3L4Z6;A0A1W2PRC2;O14653-3;A0A1W2PR23;A0A1W2PPW8;A0A1W2PR02;A0A1W2PS12;A0A1X7SBU8;A0A1W2PRL0;I3L0K1;A0A1W2PRP7;A0A1W2PQP2;I3L1K7;A0A1W2PNV3;A0A1W2PQ77;A0A1W2PRE6;A0A1W2PQ06;A0A1W2PQE0;A0A1W2PRD0;A0A1W2PQ38;A0A1W2PQQ4;A0A1W2PQ12	A0A1W2PPG5;A0A1W2PPP5;A0A1W2PPG1;A0A1W2PQM3;A0A1W2PS81;E7EQ34;I3NI02;O14653;O14653-2;A0A1W2PRV0;I3L4Z6;A0A1W2PRC2;O14653-3;A0A1W2PR23;A0A1W2PPW8;A0A1W2PR02;A0A1W2PS12;A0A1X7SBU8;A0A1W2PRL0;I3L0K1;A0A1W2PRP7;A0A1W2PQP2;I3L1K7;A0A1W2PNV3;A0A1W2PQ77;A0A1W2PRE6;A0A1W2PQ06;A0A1W2PQE0	GOSR2	26.978	0.614062	0.870793	0.697487	n.s.	n.s.	n.s.	-0.386607	0.139021	-0.525627		n.s.
A0A1X7SBZ2;A0A1W2PQ51;Q92841;Q92841-1;Q92841-3;Q92841-2;A0A0U1RQJ0	A0A1X7SBZ2;A0A1W2PQ51;Q92841;Q92841-1;Q92841-3;Q92841-2	DDX17	29.5907	0.0186119	0.00275734	0.665871	AvC_do	AvM_do	n.s.	-0.295341	-0.400676	0.105335	AS specific	changed in MR
A0A1W2PQS6;F6U211;A0A2R8Y7H1;S4R435;A0A2R8YFH6;A0A2R8Y6L3	A0A1W2PQS6;F6U211;A0A2R8Y7H1;S4R435;A0A2R8YFH6;A0A2R8Y6L3	RPS10-NUDT3	29.7504	5.79903e-07	0.000980581	0.289306	AvC_do	AvM_do	n.s.	-0.853688	-0.576889	-0.276799	AS specific	changed in MR
A0A1W2PS24;Q5SRN5;P04439;Q5SRN7	A0A1W2PS24;Q5SRN5;P04439;Q5SRN7	HLA-A	27.3934	0.437382	0.671711	0.890929	n.s.	n.s.	n.s.	-0.554135	-0.341758	-0.212377		n.s.
A0A1W2PS43;Q14108;A0A1W2PQR6;A0A1W2PQB7;A0A1W2PRS1;A0A1W2PPX5;A0A1W2PPU6;A0A1W2PRF6;Q14108-2;A0A1W2PSE4;A0A1W2PQL5;D6RDG0;A0A1W2PS70;A0A1W2PNX7;A0A1W2PPX6	A0A1W2PS43;Q14108;A0A1W2PQR6;A0A1W2PQB7;A0A1W2PRS1;A0A1W2PPX5;A0A1W2PPU6;A0A1W2PRF6;Q14108-2	SCARB2	29.8171	0.00446438	0.0197784	0.880335	AvC_do	AvM_do	n.s.	-0.410081	-0.358535	-0.0515454	AS specific	changed in MR
A0A286YF22;O43175;A0A2C9F2M7;A0A286YFL2;A0A286YFA2;A0A286YFM8;A0A286YF78;A0A286YFE1;A0A286YER3;A0A286YFC8;A0A286YFB2;A0A286YF34;A0A286YFF3;A0A286YFK5	A0A286YF22;O43175;A0A2C9F2M7;A0A286YFL2;A0A286YFA2	PHGDH	27.3334	0.0212875	0.00334509	0.673898	AvC_do	AvM_do	n.s.	-1.10736	-1.50105	0.393685	AS specific	changed in MR
A0A2C9F2P4;A0A286YFF7;P50897;Q5T0S4;A0A286YFE3;A0A286YFL8;P50897-2;E9PK48;A0A286YFL6	A0A2C9F2P4;A0A286YFF7;P50897;Q5T0S4;A0A286YFE3;A0A286YFL8;P50897-2	PPT1	29.7418	0.644535	0.235845	0.698301	n.s.	n.s.	n.s.	-0.116109	-0.286614	0.170504		n.s.
A0A2Q2TTZ9;P01594;P01593	A0A2Q2TTZ9;P01594;P01593	IGKV1D-33	29.7092	0.0654467	0.046217	0.00284331	n.s.	AvM_do	MvC_up	0.723434	-0.82828	1.55171	MR sepcific	changed in MR
A0A2Q3DP09;Q7Z3E5-2;Q7Z3E5;H7C2P6;C9JW07;H7C3U7;H7BZY2	A0A2Q3DP09;Q7Z3E5-2;Q7Z3E5	ARMC9	24.7947	0.199963	0.195272	0.972547	n.s.	n.s.	n.s.	0.683732	0.728399	-0.0446671		n.s.
A6NNI4;A0A2R8Y478;G8JLH6;P21926;A0A087WU13	A6NNI4;A0A2R8Y478;G8JLH6;P21926	CD9	27.3758	0.92447	0.207875	0.483438	n.s.	n.s.	n.s.	-0.0781187	-0.885711	0.807593		n.s.
A0A2R8Y4H2;B1AHR1;Q9UH03-2;Q9UH03	A0A2R8Y4H2;B1AHR1;Q9UH03-2;Q9UH03	SEPT3	27.8867	0.770465	0.458068	0.504277	n.s.	n.s.	n.s.	0.119018	-0.296092	0.415111		n.s.
A0A2R8Y4J4;Q9NWS8;A0A087WXU0;Q5SZ82;Q9NWS8-2;A0A2R8Y4P5;A0A2R8YFC3;Q9NWS8-3	A0A2R8Y4J4;Q9NWS8;A0A087WXU0;Q5SZ82;Q9NWS8-2	RMND1	25.9093	0.0893799	0.00537257	0.490302	n.s.	AvM_do	n.s.	-0.991766	-1.69974	0.707972		changed in MR
A0A2R8Y4T1;E9PGF5;A0A087WWW7;H0Y4U1;E7ERH1;E7EMG1;Q9HBL0-2;H7C3Z4;C9JI43;C9J8K5;C9JFT7;C9JZT0	A0A2R8Y4T1;E9PGF5;A0A087WWW7;H0Y4U1	TNS1	33.0245	2.60221e-05	0.0230783	6.48184e-07	AvC_up	AvM_do	MvC_up	0.477139	-0.269587	0.746726	shared	changed in MR
A0A2R8Y4Y7;Q9UQ90;A0A2R8Y7B8;A0A2R8YFW4;A0A2U3TZH1;A0A2R8YDQ1;A0A2R8Y726;A0A2R8Y3M4;A0A2R8Y6K2;A0A2R8Y7E2;A0A2R8YGZ0;A0A2R8Y6E8;A0A2R8YFJ7;A0A2R8YG79;A0A2R8Y4M0;A0A2R8YFF4;A0A2R8Y632;A0A2R8Y729;Q9UQ90-2;A0A2R8Y7N2;A0A2R8YEH4;A0A2R8Y4M8;A0A2R8Y6Z7;A0A2R8YFN9;A0A2R8Y4Z7;H3BTY6;A0A2R8Y4L7;A0A2R8YGV4;A0A2R8Y4L0;A0A2R8Y617;H3BTR8;H3BMP1;A0A2R8YFQ9;H3BNE4;A0A2R8Y856;A0A2R8YDW8;A0A087X0F5	A0A2R8Y4Y7;Q9UQ90;A0A2R8Y7B8;A0A2R8YFW4;A0A2U3TZH1;A0A2R8YDQ1;A0A2R8Y726;A0A2R8Y3M4;A0A2R8Y6K2;A0A2R8Y7E2;A0A2R8YGZ0;A0A2R8Y6E8;A0A2R8YFJ7	SPG7	30.102	0.000127017	0.0137297	0.480838	AvC_do	AvM_do	n.s.	-0.771741	-0.52159	-0.250151	AS specific	changed in MR
A0A2R8Y504;O43556-4;A0A2R8Y821;A0A2R8Y5P8;A0A2R8Y4X1;A0A2R8Y4E3;A0A2R8Y5X5;B7Z2R4;A0A2R8YGQ3;A0A2R8Y5R7;A0A2R8YE48;O43556;A0A2R8Y6Y5;A0A2R8Y6G8;A0A2R8Y5H7;A0A2R8YE16;A0A2R8Y628;C9JR67;A0A2R8Y6V3;A0A2R8Y621;A0A2R8Y7J1;A0A2R8YH84;A0A2R8Y5J3;A0A2R8Y4P8;A0A2R8Y652;A0A2R8Y5J6;A0A2R8Y5X0;A0A2R8Y638;A0A2R8Y5M2;O43556-3;E9PEH6;A0A2R8Y416;A0A2U3TZN7;A0A2R8Y2R1;A0A2R8Y5Q3;A0A2R8Y6U6;A0A2R8YEY2;A0A2R8YFA5;A…	A0A2R8Y504;O43556-4;A0A2R8Y821;A0A2R8Y5P8;A0A2R8Y4X1;A0A2R8Y4E3;A0A2R8Y5X5;B7Z2R4;A0A2R8YGQ3;A0A2R8Y5R7;A0A2R8YE48;O43556;A0A2R8Y6Y5;A0A2R8Y6G8;A0A2R8Y5H7;A0A2R8YE16;A0A2R8Y628;C9JR67;A0A2R8Y6V3;A0A2R8Y621;A0A2R8Y7J1;A0A2R8YH84;A0A2R8Y5J3;A0A2R8Y4P8;A0A2R8Y652;A0A2R8Y5J6;A0A2R8Y5X0;A0A2R8Y638;A0A2R8Y5M2;O43556-3;E9PEH6;A0A2R8Y416;A0A2U3TZN7;A0A2R8Y2R1;A0A2R8Y5Q3;A0A2R8Y6U6;A0A2R8YEY2;A0A2R8YFA5;A…	SGCE	28.6444	0.648708	0.00185989	0.0469039	n.s.	AvM_do	MvC_up	-0.150855	-0.973043	0.822188	MR sepcific	changed in MR
A0A2R8Y566;Q9P260-2;A0A075B768	A0A2R8Y566;Q9P260-2	RELCH	25.2536	0.504277	0.0867436	0.545175	n.s.	n.s.	n.s.	-0.289287	-0.72627	0.436982		n.s.
A0A2R8Y5N2;Q92574;A0A2R8YFV7;A0A2R8Y5S3;Q92574-2;A0A2R8Y6S1;Q59IT9;A0A2R8YEH9;Q86WV8;A0A2R8Y7E9;A0A2R8Y6W1;A0A2R8YGX7;A0A2R8YD74;A0A2R8Y5M3;A0A2R8YGL0;A0A2R8Y5F8;A0A2R8Y5U8;A0A2R8Y6S8;A0A2R8Y5J1;A0A2R8Y5Q4;A0A2R8Y6N1;A0A2R8Y419;A0A2R8Y756	A0A2R8Y5N2;Q92574;A0A2R8YFV7;A0A2R8Y5S3;Q92574-2;A0A2R8Y6S1	TSC1	28.3316	0.579048	0.144041	0.611001	n.s.	n.s.	n.s.	0.49382	1.2543	-0.760477		n.s.
A0A2R8Y5P7;P49590;A0A2R8Y3N3;P49590-2;A0A2R8Y6I1;D6RB22;B4DQ67;D6RJE6;A0A2R8Y5E8;A0A2R8Y4X6	A0A2R8Y5P7;P49590;A0A2R8Y3N3;P49590-2;A0A2R8Y6I1;D6RB22;B4DQ67;D6RJE6	HARS2	28.9712	0.012436	0.0960782	0.726299	AvC_do	n.s.	n.s.	-0.462412	-0.329579	-0.132833		n.s.
A0A2R8Y5V9;A0A2R8YGX3;A0A2R8YH90;K7EP68;K7EMU5;A0A2R8YHD2;K7EPV9	A0A2R8Y5V9;A0A2R8YGX3;A0A2R8YH90	TPM4	35.4253	0.694892	0.121445	0.499272	n.s.	n.s.	n.s.	0.0552835	0.202607	-0.147323		n.s.
A0A2R8Y6G6;A0A2R8Y798;A0A2R8YEG5	A0A2R8Y6G6	ENO1	27.7128	0.299638	0.989546	0.561559	n.s.	n.s.	n.s.	-0.59462	-0.00951191	-0.585108		n.s.
A0A2R8Y7X9;P69891;A0A0J9YYA3	A0A2R8Y7X9;P69891	HBG1	28.1084	0.000560839	0.85661	0.00613903	AvC_up	n.s.	MvC_up	2.61198	-0.171095	2.78307	shared	n.s.
A0A2R8Y851;P62273;P62273-2;A0A2R8Y6P7;A0A087WTT6	A0A2R8Y851;P62273;P62273-2;A0A2R8Y6P7;A0A087WTT6	RPS29	26.2739	0.221511	0.903775	0.403859	n.s.	n.s.	n.s.	-0.618251	0.0766331	-0.694884		n.s.
A0A2R8YCJ8;Q9NVV5-3;Q9NVV5-2;Q9NVV5;Q5T2H3;Q9NVV5-4;Q5THU2;Q5T2H0;Q5T2H4;Q9NVV5-6;Q9NVV5-5	A0A2R8YCJ8;Q9NVV5-3;Q9NVV5-2;Q9NVV5;Q5T2H3;Q9NVV5-4;Q5THU2;Q5T2H0;Q5T2H4;Q9NVV5-6;Q9NVV5-5	AIG1	26.1959	0.928673	0.359437	0.527743	n.s.	n.s.	n.s.	-0.0590833	0.527204	-0.586287		n.s.
A0A2R8YCY2	A0A2R8YCY2	FRY	29.4171	0.169155	0.936189	0.452624	n.s.	n.s.	n.s.	0.683142	0.0483464	0.634796		n.s.
A0A2R8YD58;E7EU96;P68400;A0A2R8Y5A0;A0A2R8YDP2;A0A2R8YF43;A0A2R8YFU2;A0A2R8Y4D6;A0A2R8Y4H0;P68400-2;V9GYA2;A0A2R8YEW1;A0A2R8YDY7;A0A2R8YCK2;A0A2R8Y3W6;A0A2R8Y797;V9GY80;A0A2R8YF47;A0A2R8Y7T1;A0A087WY74;A0A2R8YCC9;V9GYW6;REV__E7EP72	A0A2R8YD58;E7EU96;P68400;A0A2R8Y5A0;A0A2R8YDP2;A0A2R8YF43;A0A2R8YFU2;A0A2R8Y4D6;A0A2R8Y4H0;P68400-2	CSNK2A1	30.2406	0.0249347	0.235926	0.61373	AvC_do	n.s.	n.s.	-0.335187	-0.193219	-0.141967		n.s.
A0A2R8YDQ9;Q5T9Q5;A0A0U1RRI1;A0A0U1RQL1	A0A2R8YDQ9;Q5T9Q5	SUCLA2	34.3071	0.00756914	0.233653	0.428267	AvC_do	n.s.	n.s.	-0.253694	-0.123759	-0.129935		n.s.
A0A2R8YG42;Q14155-5;Q14155-3;Q14155;F6SJA5	A0A2R8YG42;Q14155-5;Q14155-3;Q14155	ARHGEF7	27.7084	0.326164	0.597212	0.861661	n.s.	n.s.	n.s.	-0.482474	-0.295027	-0.187447		n.s.
A0A2U3TZH3;Q05639;A0A2R8Y488;A0A2R8Y660;A0A2R8YDN5	A0A2U3TZH3;Q05639	EEF1A2	35.9104	0.687343	0.145446	0.185946	n.s.	n.s.	n.s.	-0.0434589	0.146572	-0.190031		n.s.
E9PNW4;A0A2U3TZL5;E9PR17;P13987;H0YET2;E9PI80	E9PNW4;A0A2U3TZL5;E9PR17;P13987	CD59	28.4755	0.015693	0.899494	0.134038	AvC_do	n.s.	n.s.	-1.19827	-0.0818839	-1.11639		n.s.
A0A3B3IPE9;Q6ZSZ5-1;A0A087WZG4;Q6ZSZ5-2;Q6ZSZ5-6;Q6ZSZ5-5;Q6ZSZ5;M0QZS0	A0A3B3IPE9;Q6ZSZ5-1;A0A087WZG4;Q6ZSZ5-2;Q6ZSZ5-6;Q6ZSZ5-5;Q6ZSZ5;M0QZS0	ARHGEF18	24.9543	0.0105089	0.141836	0.602642	AvC_up	n.s.	n.s.	1.17191	0.724806	0.447107		n.s.
A0A3B3IRL2;O75629	A0A3B3IRL2;O75629	CREG1	26.0138	0.0446494	0.391732	0.0328581	AvC_do	n.s.	MvC_do	-0.908389	0.43513	-1.34352	shared	n.s.
A0A3B3IRN5;Q06828	A0A3B3IRN5;Q06828	FMOD	27.4911	9.88039e-06	0.00410449	0.371498	AvC_up	AvM_up	n.s.	4.52283	3.02945	1.49338	AS specific	changed in AS
A0A3B3IRT8;P43307;C9J3L8;C9J5W0;E9PAL7;C9IZQ1;P43307-2;C9JBX5	A0A3B3IRT8;P43307;C9J3L8;C9J5W0;E9PAL7;C9IZQ1;P43307-2	SSR1	27.4043	0.00495806	0.825169	0.0833083	AvC_do	n.s.	n.s.	-0.649892	-0.0646786	-0.585214		n.s.
A0A3B3ISG5;P14735;P14735-2	A0A3B3ISG5;P14735	IDE	29.3705	0.000159444	0.000119094	0.855868	AvC_do	AvM_do	n.s.	-0.433358	-0.480771	0.0474132	AS specific	changed in MR
A0A3B3ISR2;B4DPQ0;F5H2D0;P00736;A0A3B3ITU4;F5H1V0;F5H6Y3;F5H3N3;F5H3A3	A0A3B3ISR2;B4DPQ0;F5H2D0;P00736;A0A3B3ITU4	C1R	26.49	0.47139	0.0736408	0.0594335	n.s.	n.s.	n.s.	0.562539	-1.37425	1.93679		n.s.
A0A3B3ISS6;Q14956-2;Q14956;Q96F58	A0A3B3ISS6;Q14956-2;Q14956	GPNMB	31.3112	0.759476	0.901343	0.811181	n.s.	n.s.	n.s.	-0.146762	0.0662245	-0.212987		n.s.
A0A3B3ISU0;Q02487	A0A3B3ISU0;Q02487	DSC2	28.823	0.424665	0.910522	0.727501	n.s.	n.s.	n.s.	0.162901	0.0273579	0.135543		n.s.
A0A3B3ISV4	A0A3B3ISV4	VKORC1L1	25.468	0.556625	0.117015	0.576596	n.s.	n.s.	n.s.	-0.250697	-0.648507	0.39781		n.s.
A0A3B3ISX9;A0A087WWA5	A0A3B3ISX9	TNXB	33.1901	6.02904e-08	0.425354	0.000255679	AvC_up	n.s.	MvC_up	1.30528	0.204917	1.10036	shared	n.s.
A0A3B3IT47;Q9Y2I8;Q9Y2I8-2;E7EQ49;A0A087WTQ2;Q9Y2I8-3;C9JGR9	A0A3B3IT47;Q9Y2I8;Q9Y2I8-2;E7EQ49;A0A087WTQ2;Q9Y2I8-3;C9JGR9	WDR37	26.4722	0.208652	0.18099	0.954488	n.s.	n.s.	n.s.	-0.372781	-0.416668	0.0438871		n.s.
A0A3B3IT82;P54132;H0YNU5	A0A3B3IT82;P54132;H0YNU5	BLM	25.5128	0.448215	0.053946	0.48715	n.s.	n.s.	n.s.	0.510929	1.278	-0.767074		n.s.
A0A3B3ITP4;Q495G5;Q8IVH4;D6RIS5;A0A3B3IRG3	A0A3B3ITP4;Q495G5;Q8IVH4;D6RIS5	MMAA	27.1191	0.00414785	0.260663	0.320214	AvC_do	n.s.	n.s.	-0.913858	-0.394724	-0.519134		n.s.
A0A3B3ITT5;P47914	A0A3B3ITT5;P47914	RPL29	28.3811	0.504277	0.711014	0.904786	n.s.	n.s.	n.s.	-0.124213	-0.0765186	-0.0476943		n.s.
A0A3B3ITX9;H7C2G0;C9JX40;P55822-2;C9JJT2;B4DLW3;H7C1Y8;A0A096LNT6;A0A3B3IUG4;H7C3V3;A0A3B3ISA8;C9JLV3	A0A3B3ITX9;H7C2G0	WRB-SH3BGR	30.1396	0.69532	0.0233494	0.204852	n.s.	AvM_up	n.s.	0.139524	0.743836	-0.604312		changed in AS
A0A3B3ITZ9;Q9Y2W1	A0A3B3ITZ9;Q9Y2W1	THRAP3	25.2996	0.322244	0.844681	0.46492	n.s.	n.s.	n.s.	-0.392671	0.0930279	-0.485699		n.s.
A0A3B3IU69;O00423;O00423-3;G3V3N9;G3V4H6;G3V538;G3V5C8;G3V3J1;H0YJK4;H0YJY3;H0YJD8	A0A3B3IU69;O00423;O00423-3	EML1	28.2419	0.896876	0.0224019	0.133026	n.s.	AvM_do	n.s.	-0.0283818	-0.411517	0.383136		changed in MR
A0A3B3IUB1;Q13144;A0A3B3ISX3;A0A3B3ITG6;A0A3B3IUF2;A0A3B3ISM8;A0A3B3ITQ2;A0A3B3IS56;A0A3B3IRP4;A0A3B3ISS1;A0A3B3ISV1;A0A3B3IST9;A0A3B3ISI2;A0A3B3ITK8;C9JRD9;A0A3B3IT53;H7C2X0	A0A3B3IUB1;Q13144;A0A3B3ISX3;A0A3B3ITG6;A0A3B3IUF2;A0A3B3ISM8;A0A3B3ITQ2	EIF2B5	26.0569	0.0912292	0.634911	0.528942	n.s.	n.s.	n.s.	-0.759487	-0.253586	-0.505901		n.s.
A0A3F2YNY6;O75400-2;H7C2N3;H7BXZ7;O75400-5	A0A3F2YNY6;O75400-2	PRPF40A	24.433	0.233737	0.12789	0.0420749	n.s.	n.s.	MvC_up	0.753488	-0.999356	1.75284		n.s.
A0A3F2YNY7;P08397;A0A3B3IRR1;P08397-2;F5H345;P08397-3;F5H0P4;P08397-4;F5GY90;F5H226;A0A3B3IU56;A0A1W2PNU5;A0A3B3IU34;A0A0G2JQQ7;F5H4X2;F5H4W5	A0A3F2YNY7;P08397;A0A3B3IRR1;P08397-2;F5H345;P08397-3;F5H0P4;P08397-4;F5GY90;F5H226	HMBS	25.7832	0.69635	0.157037	0.559816	n.s.	n.s.	n.s.	-0.191898	-0.649566	0.457668		n.s.
A0AVT1;A0AVT1-2;H0Y8S8;A0AVT1-3;A0AVT1-4;H0Y9U5	A0AVT1;A0AVT1-2	UBA6	27.7625	0.0410692	0.000293109	0.223441	AvC_do	AvM_do	n.s.	-0.413441	-0.79614	0.382699	AS specific	changed in MR
A0PJW6;G5EA27	A0PJW6	TMEM223	26.6575	0.00268975	0.360044	0.204298	AvC_do	n.s.	n.s.	-1.00427	-0.344325	-0.65995		n.s.
A1A4S6;H0Y8W5	A1A4S6;H0Y8W5	ARHGAP10	25.0008	0.697824	0.509878	0.495657	n.s.	n.s.	n.s.	0.19039	-0.328119	0.51851		n.s.
A1L020	A1L020	MEX3A	25.0289	0.289726	0.913615	0.484051	n.s.	n.s.	n.s.	0.591268	-0.0736797	0.664947		n.s.
A1L0T0;M0R026;M0QZX5;E9PJS0;M0R1B5;E9PL44;E9PNL1	A1L0T0;M0R026	ILVBL	31.4545	0.40459	0.679365	0.864286	n.s.	n.s.	n.s.	-0.247389	-0.139048	-0.108341		n.s.
A1L4K1;H0YLA8	A1L4K1	FSD2	26.5209	0.0523995	0.935333	0.179211	n.s.	n.s.	n.s.	0.606141	-0.0316925	0.637834		n.s.
A2RRP1;A2RRP1-2;H0Y5G7;H7C007;C9JCM7;H7BZR3;H7C1U4;H7BZU5	A2RRP1;A2RRP1-2;H0Y5G7	NBAS	26.8551	0.00418319	0.214214	0.371477	AvC_do	n.s.	n.s.	-1.04777	-0.496889	-0.550881		n.s.
A3KMH1-3;A3KMH1;A3KMH1-2	A3KMH1-3;A3KMH1;A3KMH1-2	VWA8	30.2796	0.00439309	0.117514	0.520643	AvC_do	n.s.	n.s.	-0.63116	-0.373631	-0.257529		n.s.
A4FU69-3;A4FU69;A4FU69-4;A4FU69-2;H0Y843;A4FU69-5;K7EJC3;C9J1E6	A4FU69-3;A4FU69;A4FU69-4;A4FU69-2;H0Y843;A4FU69-5	EFCAB5	25.2617	0.626081	0.315901	0.793799	n.s.	n.s.	n.s.	-0.335099	-0.679316	0.344218		n.s.
A4UGR9-2;A4UGR9;A4UGR9-8;A4UGR9-3;A0A0A0MQZ3	A4UGR9-2;A4UGR9;A4UGR9-8;A4UGR9-3	XIRP2	33.1153	0.736152	0.0116753	0.0268931	n.s.	AvM_up	MvC_do	-0.104095	0.706186	-0.810281	MR sepcific	changed in AS
A5D6W6	A5D6W6	FITM1	24.6166	0.0763167	0.378338	0.681428	n.s.	n.s.	n.s.	-0.8316	-0.458752	-0.372849		n.s.
A5YKK6;A5YKK6-2;A5YKK6-3;A5YKK6-4;H3BMZ2;H3BNB1;H3BVC9;H3BTH2;H3BR89;H3BMH0;H3BT18;H3BU44	A5YKK6;A5YKK6-2;A5YKK6-3;A5YKK6-4	CNOT1	25.0511	0.764177	0.600568	0.60015	n.s.	n.s.	n.s.	0.221183	-0.392824	0.614007		n.s.
A6NC48;Q10588;Q10588-2;H0Y984;H0Y9Q9;H0Y8G4	A6NC48;Q10588;Q10588-2;H0Y984;H0Y9Q9;H0Y8G4	BST1	26.1837	0.561667	0.00696626	0.142688	n.s.	AvM_do	n.s.	-0.351748	-1.5622	1.21046		changed in MR
H3BTL1;Q9GZQ8;A6NCE7	H3BTL1;Q9GZQ8;A6NCE7	MAP1LC3B	28.6053	0.294778	0.766788	0.383163	n.s.	n.s.	n.s.	-0.234422	0.0792319	-0.313654		n.s.
A6NDG6;H3BV17	A6NDG6	PGP	30.0277	0.671767	0.383398	0.824284	n.s.	n.s.	n.s.	0.0685305	0.138325	-0.069794		n.s.
A6NDU8;A0A0C4DGW6	A6NDU8;A0A0C4DGW6	C5orf51	24.5271	0.998018	0.777268	0.881867	n.s.	n.s.	n.s.	-0.000764875	-0.116835	0.11607		n.s.
A6NEL0;P05114;A6NL93;F2Z2W6;F2Z2Y5;H7BXJ5	A6NEL0;P05114;A6NL93	HMGN1	24.033	0.189188	0.555451	0.754096	n.s.	n.s.	n.s.	0.646875	0.333672	0.313203		n.s.
A6NFX8;Q9UKK9;A6NJU6;A6NCQ0;C9JYY9;H0YEY4	A6NFX8;Q9UKK9;A6NJU6;A6NCQ0	NUDT5	25.5365	0.74294	0.374684	0.421874	n.s.	n.s.	n.s.	0.130046	-0.336366	0.466412		n.s.
A6NGQ3;Q5VST9-6;Q5VST9;Q5VST9-2;Q5VST9-5;A0A1B0GTS2;H3BQA7;A0A0A0MRI8;REV__Q9NX65-3;REV__Q9NX65-2	A6NGQ3;Q5VST9-6;Q5VST9;Q5VST9-2;Q5VST9-5	OBSCN	34.2893	0.132966	0.048194	0.789559	n.s.	AvM_up	n.s.	0.152699	0.210248	-0.0575496		changed in AS
A6NHL2-2;A6NHL2	A6NHL2-2;A6NHL2	TUBAL3	27.6272	9.84833e-07	0.0223246	0.0610566	AvC_up	AvM_up	n.s.	2.31817	1.10245	1.21572	AS specific	changed in AS
A6NHR9;A6NHR9-2;J3KTL8;A6NHR9-3;A0A2R8YCU7;A0A2R8YE92;J3KRK8;J3QSH1	A6NHR9;A6NHR9-2	SMCHD1	24.0203	0.676831	0.528518	0.908291	n.s.	n.s.	n.s.	-0.26006	-0.403183	0.143123		n.s.
A6NHZ5	A6NHZ5	LRRC14B	25.927	0.902345	0.133882	0.265561	n.s.	n.s.	n.s.	0.0736062	-0.743408	0.817014		n.s.
A6NLH6;Q9P003	A6NLH6;Q9P003	CNIH4	27.0491	0.0266116	0.0193834	0.906699	AvC_do	AvM_do	n.s.	-0.833881	-0.935318	0.101437	AS specific	changed in MR
A6NMH6;Q92599-2;Q92599-4;Q92599;A6NFQ9;F8W8I8;A0A087X142;Q92599-3;C9J4G8;C9JV02;A0A0A0MRP8	A6NMH6;Q92599-2;Q92599-4;Q92599;A6NFQ9;F8W8I8;A0A087X142;Q92599-3	SEPT8	27.8459	0.0336398	0.224781	0.680143	AvC_up	n.s.	n.s.	0.43774	0.271934	0.165806		n.s.
E9PJK1;E9PRJ8;H0YDL9;H0YDJ9;E9PIF1;A6NMH8;P60033;E9PM31;H0YEE2	E9PJK1;E9PRJ8;H0YDL9;H0YDJ9;E9PIF1;A6NMH8;P60033	CD81	28.3743	0.092966	0.462436	0.0787228	n.s.	n.s.	n.s.	0.470173	-0.23374	0.703913		n.s.
A6NMQ3;Q5T5H1;O43768-2;O43768;O43768-9;O43768-3;O43768-4;A0A1W2PRU0;O43768-6;O43768-5;O43768-7;O43768-8	A6NMQ3;Q5T5H1;O43768-2;O43768;O43768-9;O43768-3;O43768-4;A0A1W2PRU0;O43768-6;O43768-5;O43768-7;O43768-8	ENSA	26.4926	1.09559e-05	0.000816127	0.632447	AvC_up	AvM_up	n.s.	1.58029	1.26083	0.31946	AS specific	changed in AS
A6NMZ7;A6NMZ7-2;H0Y940;H0YA33	A6NMZ7;A6NMZ7-2	COL6A6	30.6649	0.119	0.0382634	0.00466636	n.s.	AvM_do	MvC_up	1.00304	-1.39663	2.39967	MR sepcific	changed in MR
A6PVN5;Q15257-2;Q15257-3;Q15257;F6WIT2;Q15257-4;Q5T949;Q5T948;A6PVN9;Q68CR8;A6PVN6;A6PVN8;B7ZBQ0;C9IZ76;A6PVN7;H0Y6E5;B7ZBP9;B7ZBP7;B4DDQ6	A6PVN5;Q15257-2;Q15257-3;Q15257;F6WIT2;Q15257-4;Q5T949;Q5T948;A6PVN9;Q68CR8	PTPA	29.5671	0.592593	0.108498	0.535037	n.s.	n.s.	n.s.	-0.0831522	-0.239409	0.156257		n.s.
A8K878;P55145;H7C2D6	A8K878;P55145	MANF	26.9746	0.919287	0.738351	0.803073	n.s.	n.s.	n.s.	0.0601011	-0.188007	0.248109		n.s.
A8KAH6;Q16082;E9PN16	A8KAH6;Q16082	HSPB2-C11orf52	32.2897	0.281009	0.276262	0.978487	n.s.	n.s.	n.s.	0.182339	0.193401	-0.0110616		n.s.
A8MTT3	A8MTT3	CEBPZOS	23.4561	0.738947	0.602747	0.920777	n.s.	n.s.	n.s.	0.123891	0.197771	-0.0738797		n.s.
A8MUA9;A8MU27;P55854;P55854-2	A8MUA9;A8MU27;P55854;P55854-2	SUMO3	28.4893	0.952635	0.56959	0.708106	n.s.	n.s.	n.s.	-0.0268025	0.23716	-0.263962		n.s.
P62308;A8MWD9;Q49AN9;F5H013;C9JVQ0	P62308;A8MWD9;Q49AN9;F5H013;C9JVQ0	SNRPG	27.0709	0.421522	0.758153	0.830674	n.s.	n.s.	n.s.	-0.210975	-0.0936774	-0.117298		n.s.
A8MXP9;A0A0R4J2E8;P43243;D6REM6;D6R991;B3KM87;P43243-2;H0Y8T4;Q68E03;D6R8Z5;D6RCM3;D6REK4;D6RBI2;D6RBK5;D6RE02;D6RIA2;D6RB45;A0A1B0GX04;D6R9F3;D6RAM9;D6RAY2;D6RBS2	A8MXP9;A0A0R4J2E8;P43243;D6REM6;D6R991	MATR3	30.5326	0.0508774	0.0329066	0.89547	n.s.	AvM_do	n.s.	-0.314697	-0.363988	0.0492917		changed in MR
A8MXV4	A8MXV4	NUDT19	28.8726	0.0157543	0.933718	0.0832104	AvC_do	n.s.	n.s.	-0.578765	0.0253629	-0.604128		n.s.
A8MXZ9;Q14896;A0A0A0MQU5;Q14896-2;F5GZR4	A8MXZ9;Q14896;A0A0A0MQU5;Q14896-2;F5GZR4	MYBPC3	38.472	0.795456	0.309712	0.6739	n.s.	n.s.	n.s.	0.0284801	0.103903	-0.0754225		n.s.
B0I1T2;A0A3B3IU30;B0I1T2-4;B0I1T2-3;F8WEW9;B0I1T2-2;F8WAS7	B0I1T2;A0A3B3IU30;B0I1T2-4;B0I1T2-3;F8WEW9;B0I1T2-2	MYO1G	24.7393	0.77174	0.00708814	0.0846481	n.s.	AvM_up	n.s.	0.156707	1.31008	-1.15338		changed in AS
B0QY89;Q9Y262;Q9Y262-2;B0QY90;C9JHP4;C9K0Q7;H7C3A0;H0Y7E6	B0QY89;Q9Y262;Q9Y262-2;B0QY90	EIF3L	30.0766	0.0097593	0.709497	0.161118	AvC_do	n.s.	n.s.	-0.341731	-0.0602206	-0.28151		n.s.
B0QYK0;Q01844-6;Q01844-3;Q01844;Q01844-5;A0A0D9SFL3;C9JGE3;Q01844-2;Q01844-4	B0QYK0;Q01844-6;Q01844-3;Q01844;Q01844-5;A0A0D9SFL3;C9JGE3;Q01844-2	EWSR1	27.3415	0.460903	0.777268	0.842045	n.s.	n.s.	n.s.	0.181153	0.0799994	0.101154		n.s.
B0QZ18;Q99829;A6PVH9;F2Z2V0;E7ENH5;Q5JX58;Q5JX59;Q5JX60;Q5JX44;Q5JX45;Q5JX56;Q5JX55;Q5JX61;Q5JX52;Q5JX54;Q5JX57;E7EV27;H0Y524;Q5JX53	B0QZ18;Q99829;A6PVH9;F2Z2V0;E7ENH5;Q5JX58;Q5JX59;Q5JX60;Q5JX44;Q5JX45;Q5JX56	CPNE1	28.5784	0.314015	0.0445564	0.549024	n.s.	AvM_do	n.s.	-0.457713	-0.93115	0.473437		changed in MR
B0YIW2;P02656	B0YIW2;P02656	APOC3	28.3354	0.00108819	0.606956	0.0639553	AvC_up	n.s.	n.s.	1.45898	0.2747	1.18428		n.s.
B0YJ81;A6NP58;B0YJ81-2;J3KT94;J3KS69	B0YJ81	HACD1	26.8278	0.897043	0.686697	0.752139	n.s.	n.s.	n.s.	-0.0530762	0.156433	-0.209509		n.s.
B1AKY9;P50993;H0Y7C1	B1AKY9;P50993;H0Y7C1	ATP1A2	33.2569	0.13833	0.363846	0.0823766	n.s.	n.s.	n.s.	0.173672	-0.116572	0.290243		n.s.
B1ALA9;P60891;A0A2R8Y7H4;P60891-2;B7ZB02;A0A0B4J207;P21108;B1ALA7;Q15244	B1ALA9;P60891;A0A2R8Y7H4;P60891-2	PRPS1	29.2112	0.0249493	0.214505	0.641793	AvC_up	n.s.	n.s.	0.39474	0.238184	0.156556		n.s.
B1ALD9	B1ALD9	POSTN	25.7461	1.83696e-05	0.00191608	0.571064	AvC_up	AvM_up	n.s.	2.89461	2.19971	0.694907	AS specific	changed in AS
B1ALH6;O14832;O14832-2;C9IYS5;C9JR86	B1ALH6;O14832;O14832-2;C9IYS5	PHYH	25.5508	0.382056	0.267659	0.15375	n.s.	n.s.	n.s.	0.386021	-0.501848	0.887869		n.s.
B1AMS2;Q14141-2;Q14141-4;Q14141;Q14141-3	B1AMS2;Q14141-2;Q14141-4;Q14141	SEPT6	26.2908	0.919287	0.80941	0.847494	n.s.	n.s.	n.s.	-0.0479981	0.112795	-0.160793		n.s.
B1AMW1;P19256-2;P19256-3;P19256;H0YDI1	B1AMW1;P19256-2;P19256-3;P19256;H0YDI1	CD58	25.5635	0.321884	0.725215	0.775802	n.s.	n.s.	n.s.	-0.3637	-0.150082	-0.213618		n.s.
B3KS98;O15372;A0A087WZK9;E5RJT0;E5RGU4;E5RFW7;E5RFH0;E5RHC7;E5RH59	B3KS98;O15372;A0A087WZK9	EIF3H	28.0385	0.0927943	0.3676	0.0577285	n.s.	n.s.	n.s.	-0.372896	0.220677	-0.593573		n.s.
B3KW70;F5GYX4;H0YG03;Q13361-2;Q13361;H0YGS3;F5H7Z2;F5H2W4;F5H413	B3KW70;F5GYX4;H0YG03;Q13361-2;Q13361;H0YGS3;F5H7Z2;F5H2W4	MFAP5	28.5669	4.27343e-07	0.0639309	0.0147324	AvC_up	n.s.	MvC_up	1.40777	0.524762	0.883008	shared	n.s.
B4DDF4;B4DUT8;Q99439;A0A087X271;A0A087X1X5;H3BVI6;Q99439-2;K7ES69;H3BQH0;A0A087WV51;U3KPS3	B4DDF4;B4DUT8;Q99439;A0A087X271;A0A087X1X5;H3BVI6;Q99439-2;K7ES69	CNN2	27.3955	0.917157	0.0824982	0.280458	n.s.	n.s.	n.s.	0.0386219	0.523891	-0.485269		n.s.
B4DJV2;O75390;A0A0C4DGI3;H0YIC4;F8VPA1;F8W4S1;F8VRI6;F8VPF9;F8W1S4;F8VRP1;F8VX68;F8VTT8;F8VZK9;F8VR34;F8W0J2	B4DJV2;O75390;A0A0C4DGI3	CS	36.4699	1.46697e-05	0.130188	0.0481044	AvC_do	n.s.	MvC_do	-0.524998	-0.192613	-0.332385	shared	n.s.
B4DLN1	B4DLN1		30.3724	0.0209883	0.313164	0.505742	AvC_do	n.s.	n.s.	-0.324938	-0.157504	-0.167434		n.s.
B4DLR8;P15559-3;P15559-2;P15559;H3BRK3;H3BNV2	B4DLR8;P15559-3;P15559-2;P15559;H3BRK3;H3BNV2	NQO1	24.824	0.239202	0.799187	0.634835	n.s.	n.s.	n.s.	-0.599524	-0.156938	-0.442587		n.s.
B4DR61;P61619;P61619-3;H7C1Q9;C9JXC6;H7C069;A6NK38;F2Z2C7;A6NIF9;C9JJV4	B4DR61;P61619;P61619-3	SEC61A1	26.3146	0.605647	0.0784108	0.456565	n.s.	n.s.	n.s.	0.231271	0.751931	-0.52066		n.s.
B4DR80;Q9Y6E0-2;Q9Y6E0;H0Y630;Q5JV98;Q5JV99	B4DR80;Q9Y6E0-2;Q9Y6E0;H0Y630	STK24	28.1181	0.421621	0.383398	0.966483	n.s.	n.s.	n.s.	-0.227015	-0.257216	0.0302014		n.s.
B4E1Z4;P00751;A0A0G2JH38;H7C5H1;P00751-2;C9JRT3;A0A0G2JHM4;A0A0G2JJ82;H7C526;F2Z3N2;A0A0G2JI59;C9JYQ5;A2ABG0;F8WCJ9;A0A0G2JJM0	B4E1Z4;P00751	CFB	31.4041	4.64573e-05	0.731447	0.000614622	AvC_up	n.s.	MvC_up	1.09842	-0.112083	1.2105	shared	n.s.
B5MBW9;Q8WYQ3	B5MBW9;Q8WYQ3	CHCHD10	27.277	0.0539288	0.0163017	0.775802	n.s.	AvM_do	n.s.	-1.16609	-1.53387	0.367774		changed in MR
B5MCD7;O43759-2;O43759;A2A283;F8WCE4;O43759-3	B5MCD7;O43759-2;O43759;A2A283;F8WCE4	SYNGR1	24.031	0.294894	0.836695	0.430796	n.s.	n.s.	n.s.	-0.439305	0.103761	-0.543066		n.s.
B5MCF8;P39210;B5MC53;E7EX18;G5E9F5;H0Y6M5;A8MPV4;F8WEL3;B5MC10;A8MTD3	B5MCF8;P39210;B5MC53;E7EX18;G5E9F5;H0Y6M5	MPV17	29.4854	0.015693	0.0658181	0.837404	AvC_do	n.s.	n.s.	-1.35412	-1.09858	-0.255543		n.s.
B5MCI0;H7BZZ8	B5MCI0;H7BZZ8	SMTN	28.3436	0.279876	0.0498269	0.605785	n.s.	AvM_do	n.s.	-0.406449	-0.752551	0.346103		changed in MR
B5MD23;O75954	B5MD23;O75954	TSPAN9	26.2495	0.956449	0.555196	0.767746	n.s.	n.s.	n.s.	-0.024018	-0.241742	0.217724		n.s.
B5MDF5;P62826;J3KQE5;F5H018;H0YFC6;B4DV51;A0A087X0W0	B5MDF5;P62826;J3KQE5;F5H018;H0YFC6	RAN	31.4623	0.894045	0.848062	0.978487	n.s.	n.s.	n.s.	-0.0170209	-0.023791	0.00677003		n.s.
E7EW69;B5ME97;Q9P0V9;Q9P0V9-2;E7EX04;Q9P0V9-3;C9JEW2;C9JNR7;F5H1F2;C9JEQ7;F5GYV2;F5H1W3;F8WC85	E7EW69;B5ME97;Q9P0V9;Q9P0V9-2;E7EX04;Q9P0V9-3	SEPT10	27.8987	0.240292	0.905446	0.563853	n.s.	n.s.	n.s.	0.272404	0.0342249	0.238179		n.s.
B7Z4W5;Q16773;Q16773-2;Q5T278;Q16773-3;Q5T276;Q5T277	B7Z4W5;Q16773;Q16773-2	KYAT1	26.9175	0.498424	0.663731	0.93106	n.s.	n.s.	n.s.	-0.241304	-0.173007	-0.0682973		n.s.
B7Z964;Q14BN4-5;C9JA20	B7Z964;Q14BN4-5	SLMAP	28.198	0.390312	0.705485	0.422361	n.s.	n.s.	n.s.	0.367671	-0.183371	0.551042		n.s.
B7ZC38;Q9NR46;B7ZC39;Q9NR46-2;F8WFB9;G5E9J1;H7C1Z6	B7ZC38;Q9NR46;B7ZC39;Q9NR46-2	SH3GLB2	26.1258	0.453802	0.114647	0.645958	n.s.	n.s.	n.s.	0.293949	0.612879	-0.318931		n.s.
B7ZL88;Q8N8Q8;Q8N8Q8-2;Q8N8Q8-3;Q8N8Q8-4	B7ZL88;Q8N8Q8	COX18	25.363	0.749468	0.655746	0.629416	n.s.	n.s.	n.s.	-0.248249	0.358065	-0.606314		n.s.
B7ZLQ8;Q17RY0-2;Q17RY0;E5RJM0;E5RFP2;Q17RY0-3;H0YBG1	B7ZLQ8;Q17RY0-2;Q17RY0;E5RJM0;E5RFP2;Q17RY0-3	CPEB4	24.2681	0.270823	0.867003	0.617717	n.s.	n.s.	n.s.	-0.430409	-0.0783802	-0.352029		n.s.
B8ZZ71;Q6ZP80;C9IYX5;Q6ZP80-3;Q6ZP80-2	B8ZZ71;Q6ZP80;C9IYX5;Q6ZP80-3;Q6ZP80-2	TMEM182	25.8262	0.483044	0.193871	0.148864	n.s.	n.s.	n.s.	0.459504	-0.849158	1.30866		n.s.
B8ZZB8;Q96F85-2;Q96F85	B8ZZB8;Q96F85-2;Q96F85	CNRIP1	27.4912	0.0916934	0.910522	0.237961	n.s.	n.s.	n.s.	1.2107	-0.101906	1.31261		n.s.
B8ZZQ6;P06454-2;P06454;B8ZZA1;B8ZZW7;H7C2N1	B8ZZQ6;P06454-2;P06454;B8ZZA1;B8ZZW7;H7C2N1	PTMA	27.8697	5.863e-05	0.000346353	0.946119	AvC_up	AvM_up	n.s.	1.34341	1.28656	0.0568471	AS specific	changed in AS
B8ZZV9;Q9H8M1-2;Q9H8M1;B8ZZX2	B8ZZV9;Q9H8M1-2;Q9H8M1;B8ZZX2	COQ10B	28.6553	0.0207025	0.000477216	0.38924	AvC_do	AvM_do	n.s.	-0.561479	-0.914759	0.35328	AS specific	changed in MR
C4AMC7;Q6VEQ5;A8K0Z3;A8MWX3	C4AMC7;Q6VEQ5;A8K0Z3	WASH3P	25.9315	0.442756	0.519084	0.977368	n.s.	n.s.	n.s.	0.417713	0.380166	0.0375468		n.s.
C9J0A4;P57723;C9JZY3;P57723-2;C9JTY5;C9J5V4	C9J0A4;P57723;C9JZY3;P57723-2;C9JTY5	PCBP4	26.0213	0.689835	0.0310028	0.243028	n.s.	AvM_do	n.s.	-0.286647	-1.42899	1.14234		changed in MR
C9J0K6;P30626-3;P30626-2;P30626;B4DHQ6;E9PG82	C9J0K6;P30626-3;P30626-2;P30626;B4DHQ6	SRI	29.997	0.470328	0.833296	0.571064	n.s.	n.s.	n.s.	-0.10406	0.0353346	-0.139394		n.s.
C9J2H1;Q86UX2;G5E9D8;Q86UX2-2;A0A096LP62;Q86UX2-3;Q86UX2-4;H7C5A6	C9J2H1;Q86UX2;G5E9D8;Q86UX2-2;A0A096LP62;Q86UX2-3	ITIH5	26.4942	0.197322	0.868754	0.354954	n.s.	n.s.	n.s.	0.566146	-0.0881253	0.654271		n.s.
C9J406	C9J406	IMMT	28.1605	0.0955599	0.0353623	0.00323698	n.s.	AvM_up	MvC_do	-0.727999	0.966474	-1.69447	MR sepcific	changed in AS
C9J4Z3;P61513;M0R0A1;Q6P4E4;E9PEL3;G5E9R3;A6NKH3	C9J4Z3;P61513;M0R0A1;Q6P4E4;E9PEL3;G5E9R3	RPL37A	25.9158	0.000734636	0.189927	0.207637	AvC_do	n.s.	n.s.	-1.50162	-0.633373	-0.868244		n.s.
C9J7E8;Q9UL63-2;C9JWX9;C9JVL5;C9JXB0	C9J7E8;Q9UL63-2	MKLN1	25.0804	0.872507	0.113373	0.223441	n.s.	n.s.	n.s.	-0.122682	1.04619	-1.16887		n.s.
C9JA28;Q9UNL2;Q9UNL2-2	C9JA28;Q9UNL2;Q9UNL2-2	SSR3	24.55	0.132966	0.838781	0.258585	n.s.	n.s.	n.s.	-0.522842	0.0873974	-0.61024		n.s.
C9JAX1;Q16595;A0A2R8Y5A1;Q16595-2;Q16595-3;H7C585;A0A2R8Y4G3;A0A2R8Y577	C9JAX1;Q16595;A0A2R8Y5A1;Q16595-2;Q16595-3;H7C585	FXN	29.6776	0.626493	0.372237	0.350907	n.s.	n.s.	n.s.	-0.100605	0.183925	-0.284529		n.s.
C9JG97;C9JEH3;Q13685;H7C0R2;C9JTS3	C9JG97;C9JEH3;Q13685;H7C0R2;C9JTS3	AAMP	23.6971	0.419916	0.87357	0.562594	n.s.	n.s.	n.s.	0.290427	-0.0664797	0.356906		n.s.
C9JFE4;Q13098-5;Q13098;Q13098-7;A0A096LP07;A0A096LPJ3;A8K070;Q13098-6;J3QLT0;J3KSA5;J3KRJ4;J3QS88;J3KTB0;J3QQX0;J3QS84;J3QLE8;J3QL53;J3KRE8	C9JFE4;Q13098-5;Q13098;Q13098-7;A0A096LP07;A0A096LPJ3;A8K070;Q13098-6	GPS1	29.2912	0.736665	0.57967	0.908291	n.s.	n.s.	n.s.	-0.0616985	-0.102891	0.0411925		n.s.
C9JIF9;P13798;H7C1U0;H7C393;C9JLK2;H0YFE5;F8WEH5	C9JIF9;P13798;H7C1U0;H7C393	APEH	30.3257	0.0192625	0.00769145	0.830724	AvC_do	AvM_do	n.s.	-0.254767	-0.306999	0.0522327	AS specific	changed in MR
C9JJ19;P82930	C9JJ19;P82930	MRPS34	28.1722	0.0202904	0.0030507	0.668636	AvC_do	AvM_do	n.s.	-0.469596	-0.638091	0.168495	AS specific	changed in MR
C9JJN9;Q8N3P4-3;Q8N3P4;Q8N3P4-2;C9JPI1;C9JP71;C9JG07;F8WB24;C9JKL0;H7C322;C9JIA0	C9JJN9;Q8N3P4-3;Q8N3P4;Q8N3P4-2	VPS8	25.669	0.0364635	0.0369899	0.00116528	AvC_up	AvM_do	MvC_up	1.03275	-1.0952	2.12795	shared	changed in MR
C9JME2;Q9Y4F1;Q9Y4F1-2;H0Y783;M0QXT1	C9JME2;Q9Y4F1;Q9Y4F1-2	FARP1	25.637	0.0737946	0.656263	0.474427	n.s.	n.s.	n.s.	0.926845	0.277609	0.649236		n.s.
C9JXB8;C9JNW5;P83731	C9JXB8;C9JNW5;P83731	RPL24	29.228	6.63105e-06	0.00282928	0.385255	AvC_do	AvM_do	n.s.	-0.978292	-0.670307	-0.307985	AS specific	changed in MR
C9JRZ6;Q9NX63;F8WAR4;A0A286YEX5	C9JRZ6;Q9NX63;F8WAR4	CHCHD3	32.6041	0.789644	0.449404	0.800152	n.s.	n.s.	n.s.	0.0510312	0.139638	-0.088607		n.s.
D3YTG3;Q7Z7G0;H0Y897;Q7Z7G0-3;Q7Z7G0-4;Q7Z7G0-2;Q5JPC9;H0YEA0;H7C556;E9PPR9;H7C4T1;H7C4S3;H7C4X4;H7C5S3;H0YCP4;H0YCG4;H0YEL2;H0YF18	D3YTG3;Q7Z7G0;H0Y897;Q7Z7G0-3;Q7Z7G0-4	ABI3BP	30.1964	2.41732e-06	0.641879	0.00112676	AvC_up	n.s.	MvC_up	2.11301	0.241831	1.87118	shared	n.s.
D4Q8H0;Q9NYL2-2;Q9NYL2-3;C9J3F7	D4Q8H0;Q9NYL2-2;Q9NYL2-3	pk	30.1719	0.468227	0.992963	0.695953	n.s.	n.s.	n.s.	-0.11826	-0.00173475	-0.116525		n.s.
D6R934;P02746;A0A0A0MSV6;D6RGJ1	D6R934;P02746;A0A0A0MSV6	C1QB	27.6816	4.55484e-06	0.410385	2.41139e-05	AvC_up	n.s.	MvC_up	2.33835	-0.460069	2.79842	shared	n.s.
D6R9H7;E7EQ97;E7EPU7;P05496;Q06055;P48201;Q06055-3;Q06055-2;I3L0Y5	D6R9H7;E7EQ97;E7EPU7;P05496;Q06055;P48201;Q06055-3;Q06055-2;I3L0Y5	ATP5MC1	26.1394	0.464145	0.23025	0.814244	n.s.	n.s.	n.s.	0.671089	1.10254	-0.431455		n.s.
D6R9Z7;P15954	D6R9Z7;P15954	COX7C	30.41	0.712089	0.450761	0.460713	n.s.	n.s.	n.s.	-0.178835	0.361136	-0.53997		n.s.
D6RA88;D6RJ91	D6RA88;D6RJ91	MYL5	34.5752	9.01241e-10	0.0921926	0.000176361	AvC_do	n.s.	MvC_do	-1.23948	-0.329367	-0.910112	shared	n.s.
D6RCD0;Q8NBQ5	D6RCD0;Q8NBQ5	HSD17B11	24.3789	0.865677	0.828987	0.978487	n.s.	n.s.	n.s.	-0.100253	-0.130054	0.029801		n.s.
D6RE79;D6RIZ4;D6RA47	D6RE79;D6RIZ4	MFSD10	24.9495	0.149222	0.113894	0.92466	n.s.	n.s.	n.s.	-0.451416	-0.519282	0.0678656		n.s.
D6RGI3;D6RER5;Q9NVA2;Q9NVA2-2;D6RDU5;H0Y961;D6RDP1;D6R9Y6;H0Y9G8	D6RGI3;D6RER5;Q9NVA2;Q9NVA2-2;D6RDU5;H0Y961	SEPT11	30.1021	8.04126e-05	0.505273	0.000339537	AvC_up	n.s.	MvC_up	0.562893	-0.109517	0.67241	shared	n.s.
D6REX3;O94979;O94979-3;O94979-4;O94979-9;O94979-2;O94979-8;O94979-6;O94979-10;D6RHZ5;H7BXG7;O94979-7;O94979-5;H0YAB3;H0Y8V7;H0Y9K1;H0Y9T9;H0Y8W8;D6RE64;D6RCQ9;H0YAF5;D6RBT0;D6RHE8;H0Y9V3	D6REX3;O94979;O94979-3;O94979-4;O94979-9;O94979-2;O94979-8;O94979-6;O94979-10;D6RHZ5;H7BXG7;O94979-7;O94979-5	SEC31A	29.1025	0.758482	0.42358	0.471176	n.s.	n.s.	n.s.	0.0583025	-0.147208	0.20551		n.s.
D6RF35;P02774;P02774-3;P02774-2;D6RBJ7;D6RF20	D6RF35;P02774;P02774-3;P02774-2;D6RBJ7	GC	32.412	0.0011153	0.411585	0.00167602	AvC_up	n.s.	MvC_up	0.929117	-0.26527	1.19439	shared	n.s.
D6RF48;Q9P2W9;D6RC71	D6RF48;Q9P2W9;D6RC71	STX18	25.3461	0.599119	0.500874	0.425064	n.s.	n.s.	n.s.	0.296333	-0.394168	0.6905		n.s.
D6RGG3;Q99715;Q99715-4;A0A087X0A8;Q99715-2;H0Y4P7;H0Y991	D6RGG3;Q99715;Q99715-4;A0A087X0A8;Q99715-2	COL12A1	29.3023	1.16553e-05	0.258679	0.0172152	AvC_up	n.s.	MvC_up	2.88363	0.796435	2.0872	shared	n.s.
D6RIA3	D6RIA3	C4orf54	25.3579	6.63105e-06	0.290529	0.0101545	AvC_do	n.s.	MvC_do	-3.29987	-0.827002	-2.47286	shared	n.s.
E5RGX5;Q93045;Q93045-2;E5RIR6;E7EVN3;Q9H169-3;Q9H169;Q9H169-4;Q9H169-2	E5RGX5;Q93045;Q93045-2	STMN2	25.2203	0.00619598	0.00172607	0.767746	AvC_up	AvM_up	n.s.	1.17647	1.44722	-0.27075	AS specific	changed in AS
E5RIM7;O00244;E5RGN3	E5RIM7;O00244;E5RGN3	ATOX1	27.1858	0.0191898	0.0658935	0.869169	AvC_up	n.s.	n.s.	0.757866	0.63471	0.123156		n.s.
E5RIW3;E5RJD8;O75347;E5RHG6;O75347-2;E5RIX8	E5RIW3;E5RJD8;O75347;E5RHG6;O75347-2;E5RIX8	TBCA	29.777	6.82778e-05	0.0521369	0.204852	AvC_up	n.s.	n.s.	0.486035	0.249989	0.236046		n.s.
E5RK69;H0YC77	E5RK69	ANXA6	25.9739	9.87807e-05	0.0247838	0.35067	AvC_up	AvM_up	n.s.	1.14411	0.693996	0.450111	AS specific	changed in AS
E7EM64;Q7L5N1;H7C3T0	E7EM64;Q7L5N1	COPS6	29.4839	0.054685	0.0713111	0.996488	n.s.	n.s.	n.s.	-0.498329	-0.496281	-0.00204864		n.s.
E7EN65;P15502-2;P15502-1;P15502-4;E7ENM0;F8WAH6;P15502-13;P15502-10;P15502;P15502-9;P15502-7;P15502-6;G3V0G6;P15502-5;P15502-12;B3KRT8;E7ENW7;E7EWS8;E7EN51;H7C3K0	E7EN65;P15502-2;P15502-1;P15502-4;E7ENM0;F8WAH6;P15502-13;P15502-10;P15502;P15502-9;P15502-7;P15502-6;G3V0G6;P15502-5;P15502-12;B3KRT8	ELN	29.6489	1.29721e-05	0.394794	4.74991e-05	AvC_up	n.s.	MvC_up	3.26777	-0.704463	3.97223	shared	n.s.
E7ENL6;P12111-4	E7ENL6;P12111-4	COL6A3	27.4599	0.19366	0.141157	0.916935	n.s.	n.s.	n.s.	0.600412	0.709616	-0.109203		n.s.
E7EPS8;P28827;P28827-2;J3QRB4;Q49AC9;J3KRV2;J3QLI4;J3KT55	E7EPS8;P28827;P28827-2	PTPRM	27.4746	0.799042	0.736487	0.96717	n.s.	n.s.	n.s.	-0.0753347	-0.10305	0.0277154		n.s.
E7EPT4;P19404	E7EPT4;P19404	NDUFV2	33.6247	0.0370378	0.489767	0.039882	AvC_do	n.s.	MvC_do	-0.363748	0.139883	-0.503631	shared	n.s.
E7EPV7;P37840-2;P37840;D6RA31;H6UYS7;P37840-3	E7EPV7;P37840-2;P37840;D6RA31;H6UYS7;P37840-3	SNCA	26.6523	1.35908e-05	0.104031	0.0582077	AvC_up	n.s.	n.s.	1.97865	0.775668	1.20298		n.s.
E7EQ12;D6RC54;D6RAA8	E7EQ12	CAST	26.5561	0.610675	0.0192232	0.217838	n.s.	AvM_do	n.s.	-0.156612	-0.68146	0.524849		changed in MR
E7EQ61;Q9GZZ9;E7EWE1;Q9GZZ9-2;C9J5W5;C9JRV9;C9J0F6	E7EQ61;Q9GZZ9;E7EWE1;Q9GZZ9-2;C9J5W5;C9JRV9	UBA5	27.0209	0.141638	0.286615	0.888819	n.s.	n.s.	n.s.	-0.398707	-0.311612	-0.0870952		n.s.
E7EQR4;P15311	E7EQR4;P15311	EZR	32.5445	3.29584e-05	0.000176906	0.969537	AvC_up	AvM_up	n.s.	0.434687	0.424297	0.0103903	AS specific	changed in AS
E7ERI8;E7EW49;O75122-3	E7ERI8;E7EW49;O75122-3	CLASP2	26.1196	0.241308	0.756774	0.670365	n.s.	n.s.	n.s.	-0.508525	-0.161712	-0.346814		n.s.
E7ERK9;Q9UI10;A0A087WW69;F8W8L6	E7ERK9;Q9UI10	EIF2B4	26.4903	0.0164496	0.0165208	0.957123	AvC_do	AvM_do	n.s.	-0.813884	-0.862946	0.0490624	AS specific	changed in MR
E7ESL0;J3KQY1;Q9NWU5;Q9NWU5-2;Q9NWU5-3	E7ESL0;J3KQY1;Q9NWU5;Q9NWU5-2;Q9NWU5-3	MRPL22	26.5235	0.167242	0.170358	0.978487	n.s.	n.s.	n.s.	-0.490214	-0.512815	0.0226012		n.s.
G3XAM2;E7ETH0;P05156	G3XAM2;E7ETH0;P05156	CFI	27.7933	0.00672558	0.648349	0.155219	AvC_up	n.s.	n.s.	1.23714	0.253316	0.983828		n.s.
E7ETU5;F6Y5H0;P29558-2;P29558;E7EPF2	E7ETU5;F6Y5H0;P29558-2;P29558	RBMS1	24.66	0.529423	0.325391	0.259537	n.s.	n.s.	n.s.	-0.264068	0.418434	-0.682502		n.s.
E7EUU4;Q04637-8;E9PGM1;Q04637-7;C9K073;C9J2Z7;H7C044;C9JHW9;H7C0V6;C9JIH5;C9JWH7;C9J556;C9JWH9;REV__Q8NEG2-2;REV__F5H7J8;C9JSU8;C9JWW9;REV__Q8NEG2;REV__C9JQZ6;REV__J3KQX6	E7EUU4;Q04637-8;E9PGM1;Q04637-7	EIF4G1	30.066	0.000122058	0.0796235	0.192688	AvC_do	n.s.	n.s.	-0.401507	-0.194142	-0.207365		n.s.
E7EV01;O15484;A0A3B3IRX8;K7EP62;E9PS73	E7EV01;O15484;A0A3B3IRX8	CAPN5	25.1624	0.797599	0.280689	0.644689	n.s.	n.s.	n.s.	-0.255117	-0.993121	0.738004		n.s.
E7EVA0;P27816-4;B5MEG9;A0A0J9YW37;A0A0J9YVV8	E7EVA0	MAP4	34.1211	3.25578e-11	7.30712e-05	0.0194692	AvC_up	AvM_up	MvC_up	0.646138	0.373455	0.272683	shared	changed in AS
E7EVJ5;Q96F07-2;Q96F07;E7EW33;A0A087WWZ1;A0A087WTQ3;A0A087WVE1	E7EVJ5;Q96F07-2;Q96F07;E7EW33	CYFIP2	25.434	0.0891109	0.859229	0.207742	n.s.	n.s.	n.s.	-0.604747	0.078097	-0.682844		n.s.
E7EW31	E7EW31	PROB1	29.0074	0.025339	0.199546	0.666578	AvC_do	n.s.	n.s.	-0.540761	-0.337837	-0.202925		n.s.
E7EWH9	E7EWH9	MYOM2	26.5312	0.977619	0.700894	0.819774	n.s.	n.s.	n.s.	-0.030451	0.390056	-0.420507		n.s.
E7EX17;P23588;P23588-2;F8VX11;F8VP89;F8VSC7;F8W0K0;F8VYE9;F8VRU1	E7EX17;P23588;P23588-2;F8VX11	EIF4B	28.2504	0.0122623	0.00538614	0.842045	AvC_up	AvM_up	n.s.	0.65952	0.777083	-0.117563	AS specific	changed in AS
E7EX90;Q14203-3;Q14203-4;Q14203-6;Q14203;Q14203-5;Q14203-2;Q6AWB1;E7EWF7;C9JJD0;C9JZA4;C9JTE5;C9JJN7;C9J1B7;C9JKG6;E9PCY0;C9JUI8	E7EX90;Q14203-3;Q14203-4;Q14203-6;Q14203;Q14203-5;Q14203-2;Q6AWB1	DCTN1	31.4912	0.590841	0.082548	0.480253	n.s.	n.s.	n.s.	-0.0730657	-0.22547	0.152404		n.s.
E9PAV3;F8VZJ2;H0YHX9;Q13765;F8W0W4;F8W1N5;F8VNW4;F8VZ58;Q9BZK3	E9PAV3	NACA	33.0164	0.485423	0.79042	0.549024	n.s.	n.s.	n.s.	0.0798833	-0.0352314	0.115115		n.s.
E9PB61;Q86V81	E9PB61;Q86V81	ALYREF	28.9205	0.581632	0.0854879	0.0936622	n.s.	n.s.	n.s.	0.122002	-0.365488	0.48749		n.s.
E9PCR7;E9PDF2;Q02218-2;E9PFG7	E9PCR7;E9PDF2;Q02218-2;E9PFG7	OGDH	35.8658	0.0020433	0.299958	0.210595	AvC_do	n.s.	n.s.	-0.320843	-0.11905	-0.201792		n.s.
E9PCX7;H0Y8P5;D6RCR6	E9PCX7	NNT	28.7029	0.390342	0.425034	0.245242	n.s.	n.s.	n.s.	0.295594	-0.292007	0.587602		n.s.
E9PDC3;O00192;C9JJX6;O00192-2	E9PDC3;O00192;C9JJX6;O00192-2	ARVCF	27.9317	0.625255	0.733731	0.604548	n.s.	n.s.	n.s.	-0.161143	0.122616	-0.28376		n.s.
E9PDR0;P05166;C9JQS9;E7EX59;P05166-2;E7ETT1;E7ETT4;E7EUY3;E9PEC3;F8WBI9;E7ENC1;H7C5C9;C9JVW9;C9JVY9;C9JAW3	E9PDR0;P05166;C9JQS9;E7EX59;P05166-2;E7ETT1;E7ETT4;E7EUY3;E9PEC3;F8WBI9	PCCB	32.1738	2.92185e-07	9.4379e-05	0.553774	AvC_do	AvM_do	n.s.	-0.640962	-0.512196	-0.128767	AS specific	changed in MR
E9PEJ6;P98196;H0Y547;H0Y624;A2A3G9	E9PEJ6;P98196;H0Y547	ATP11A	24.9517	0.34917	0.324026	0.96863	n.s.	n.s.	n.s.	-0.437371	-0.484048	0.0466768		n.s.
E9PER6;O15530;O15530-3;O15530-4;O15530-2;Q6A1A2;O15530-5;H3BQ10	E9PER6;O15530;O15530-3;O15530-4;O15530-2;Q6A1A2;O15530-5	PDPK1	24.6721	0.661568	0.811844	0.682686	n.s.	n.s.	n.s.	-0.211659	0.126084	-0.337743		n.s.
E9PF18;Q16836;Q16836-3;Q16836-2;A0A0A0MSE2;A0A0D9SFP2;A0A1W2PQV5;A0A1W2PNM1;A0A1W2PQ78;A0A1W2PP40;J3KR89	E9PF18;Q16836;Q16836-3;Q16836-2;A0A0A0MSE2;A0A0D9SFP2;A0A1W2PQV5;A0A1W2PNM1;A0A1W2PQ78	HADH	35.9889	9.24226e-05	0.0498269	0.237184	AvC_do	AvM_do	n.s.	-0.657602	-0.348438	-0.309164	AS specific	changed in MR
E9PG18;H9KVD2;Q14524-6;Q14524-4;Q14524;K4DIA1;A0A0A0MT39;Q14524-5;Q86V90;Q9UI33-2;Q9UI33-3;Q9UI33;A3EY21;A0A0D9SGG2;A0A1W2PQ58;A0A1W2PQI5;A0A1W2PSB2;Q9UQD0-4;Q9UQD0-5;Q9UQD0-2;Q9UQD0	E9PG18;H9KVD2;Q14524-6;Q14524-4;Q14524;K4DIA1;A0A0A0MT39;Q14524-5	SCN5A	25.9942	0.26367	0.00209085	0.161118	n.s.	AvM_do	n.s.	-0.435045	-1.22663	0.791581		changed in MR
E9PG22;Q8IW35;Q8IW35-2;H7C4Y5	E9PG22;Q8IW35;Q8IW35-2	CEP97	23.855	0.41442	0.926366	0.703257	n.s.	n.s.	n.s.	0.324178	0.0439847	0.280193		n.s.
E9PGC8;P78559;P78559-2	E9PGC8;P78559;P78559-2	MAP1A	28.1399	0.00236728	0.557007	0.00544927	AvC_up	n.s.	MvC_up	1.62113	-0.370711	1.99184	shared	n.s.
E9PGT1;Q15631;Q15631-2;A0A0J9YVW2	E9PGT1;Q15631	TSN	29.2606	0.000714198	0.0709092	0.389839	AvC_up	n.s.	n.s.	0.494421	0.282101	0.21232		n.s.
E9PHK0;P05452;CON__Q2KIS7	E9PHK0;P05452	CLEC3B	28.1818	1.13254e-08	0.442109	2.40295e-07	AvC_up	n.s.	MvC_up	2.18419	-0.310704	2.4949	shared	n.s.
E9PKC0;Q6IQ23;Q6IQ23-2;H0YDE2;Q6IQ23-3;A0A1B0GUN0;E9PL74;A0A1B0GUM1	E9PKC0;Q6IQ23;Q6IQ23-2;H0YDE2;Q6IQ23-3;A0A1B0GUN0	PLEKHA7	25.7084	0.321869	0.679552	0.351107	n.s.	n.s.	n.s.	0.583593	-0.281635	0.865228		n.s.
H7BXH2;E9PKF6;Q5H9R7-6;Q5H9R7-2;Q5H9R7;Q5H9R7-5;Q5H9R7-4;Q5H9R7-3;H0YEN2;E9PNN8;H0YDW1;E9PJD8;E9PKG4;H0YEV0	H7BXH2;E9PKF6;Q5H9R7-6;Q5H9R7-2;Q5H9R7;Q5H9R7-5;Q5H9R7-4;Q5H9R7-3;H0YEN2	PPP6R3	26.9644	0.141863	0.0865953	0.886579	n.s.	n.s.	n.s.	-0.59884	-0.731675	0.132835		n.s.
E9PLK3;P55786;P55786-2;A6NEC2;A6NEC2-2;E9PJY4;E9PPD4;H0YDG0;E9PJF9;E9PPZ2;A6NEC2-3;H0YCQ5;E9PJ74;E9PRQ5;E9PI82	E9PLK3;P55786;P55786-2	NPEPPS	33.0605	0.0476357	0.0090441	0.697487	AvC_do	AvM_do	n.s.	-0.158941	-0.220498	0.0615569	AS specific	changed in MR
E9PLL6;P46776;E9PJD9;E9PLX7	E9PLL6;P46776;E9PJD9	RPL27A	29.5347	0.000425345	0.000356012	0.884517	AvC_do	AvM_do	n.s.	-0.619374	-0.678442	0.0590682	AS specific	changed in MR
E9PM92;O00193;E9PRZ9;E9PQA1	E9PM92;O00193;E9PRZ9	C11orf58	25.2731	0.78233	0.440559	0.498541	n.s.	n.s.	n.s.	0.138878	-0.373658	0.512536		n.s.
E9PMC9;Q7Z589;Q7Z589-5;Q7Z589-2;Q7Z589-4;Q7Z589-7;Q7Z589-6;H0YDI4;E9PPE6;H0YCS3;H0YET8	E9PMC9;Q7Z589;Q7Z589-5;Q7Z589-2;Q7Z589-4;Q7Z589-7;Q7Z589-6	EMSY	24.6686	0.722579	0.363846	0.399929	n.s.	n.s.	n.s.	-0.202778	0.499565	-0.702343		n.s.
E9PMS6;Q8WWI1-3;E9PMP7;E9PJ10;E9PK58;H0YE95;E9PLU6	E9PMS6;Q8WWI1-3;E9PMP7	LMO7	26.9823	0.255336	0.25886	0.980404	n.s.	n.s.	n.s.	0.450565	0.471486	-0.020921		n.s.
E9PR30;P62861;E9PM49	E9PR30;P62861;E9PM49	FAU	28.0096	0.220341	0.276262	0.978487	n.s.	n.s.	n.s.	-0.525179	-0.496493	-0.0286861		n.s.
E9PSI1;E9PQ80;E9PQI5;E9PMQ9;O15321-2;O15321;E9PL78;E9PJM1;E9PJC4;E9PQY7;E9PS99;H0YI89;G3V1B9;E9PNW2	E9PSI1;E9PQ80;E9PQI5	CHMP4A	25.7499	0.483243	0.865983	0.602642	n.s.	n.s.	n.s.	-0.486881	0.134681	-0.621562		n.s.
F1T0E5;Q9ULU8-3;Q9ULU8-2;Q9ULU8-5;H7C538;H7C4K9;A0A0C4DGY2;H0YFP0;H7C4P2	F1T0E5;Q9ULU8-3;Q9ULU8-2	CADPS	25.9631	0.409915	0.050802	0.033519	n.s.	n.s.	MvC_up	0.520977	-1.22495	1.74593		n.s.
F5GWT4;Q9H4A3-2;Q9H4A3;Q9H4A3-5;Q9H4A3-6;Q9H4A3-7;Q9H4A3-4;F6UYG0;H0YH68;K7ENT7;Q96J92-2;Q96J92-3;Q96J92	F5GWT4;Q9H4A3-2;Q9H4A3;Q9H4A3-5;Q9H4A3-6;Q9H4A3-7;Q9H4A3-4	WNK1	25.7137	0.242158	0.0148662	0.424454	n.s.	AvM_do	n.s.	-0.464053	-0.989535	0.525482		changed in MR
F5GXE4;O95260-2;B4E107;Q5SQQ1	F5GXE4;O95260-2;B4E107	ATE1	26.9435	0.922552	0.478082	0.735486	n.s.	n.s.	n.s.	-0.0409455	-0.270997	0.230051		n.s.
F5GXX5;P61803;F5H895;A0A0B4J239	F5GXX5;P61803;F5H895;A0A0B4J239	DAD1	28.3331	0.270828	0.710654	0.735486	n.s.	n.s.	n.s.	0.220428	0.0862464	0.134182		n.s.
F5GYJ5;Q9NX18;F8W679;M0QYN2;F5GXW4;M0R060;F5H5T6;F5H8E2	F5GYJ5;Q9NX18;F8W679;M0QYN2;F5GXW4;M0R060;F5H5T6	SDHAF2	29.1394	0.0182366	0.151988	0.673651	AvC_do	n.s.	n.s.	-0.645577	-0.421716	-0.22386		n.s.
F5GZS6;J3KPF3;P08195-2;P08195-3;P08195;P08195-4;H0YFS2;F5H0E2;F5GZI0;F5H867;H0YFX4;F5GZR9	F5GZS6;J3KPF3;P08195-2;P08195-3;P08195;P08195-4	SLC3A2	24.7022	0.0756464	0.641879	0.486523	n.s.	n.s.	n.s.	-0.772612	-0.241081	-0.531532		n.s.
F5H0F9;Q9UJX4;Q9UJX4-3;H0YFB5;F5GY68;Q9UJX4-2;F5H0N1;F5H3S5	F5H0F9;Q9UJX4;Q9UJX4-3;H0YFB5	ANAPC5	26.8069	0.470175	0.63843	0.432788	n.s.	n.s.	n.s.	0.841161	-0.606849	1.44801		n.s.
F5H365;Q15436;Q15436-2;G3V4V1;G3V1W4;G3V3G5;G3V2R6;G3V5X8;G3V4Q2;G3V5K1	F5H365;Q15436;Q15436-2	SEC23A	29.4001	0.221735	0.135857	0.884387	n.s.	n.s.	n.s.	-0.382147	-0.48494	0.102793		n.s.
F5H442;Q99816;Q99816-2;J3QKS4;J3QRU6	F5H442;Q99816;Q99816-2	TSG101	28.1428	0.436577	0.929594	0.609898	n.s.	n.s.	n.s.	-0.146601	0.0193629	-0.165964		n.s.
F8W0J6;F5H4R6;H0YIV4;P55209-2;P55209;F8VUX1;F8VY35;F8W020;F8VXI6;F8VVB5	F8W0J6;F5H4R6;H0YIV4;P55209-2;P55209;F8VUX1;F8VY35;F8W020;F8VXI6	NAP1L1	30.1445	0.0785466	0.046304	0.882651	n.s.	AvM_do	n.s.	-0.51275	-0.613042	0.100293		changed in MR
F5H5D3;Q9BQE3;A0A1W2PQM2;F8VVB9;F8VRZ4;F8VS66;F8VWV9;F8VX09;F8VRK0;F8VXZ7;F8VRK1;F8W0F6	F5H5D3;Q9BQE3;A0A1W2PQM2	TUBA1C	35.4117	0.457456	0.823662	0.551047	n.s.	n.s.	n.s.	0.0909659	-0.0316877	0.122654		n.s.
F5H5I6;Q12849;H0Y8R1;H0YAK1;Q12849-5;H0YAM1	F5H5I6;Q12849;H0Y8R1;H0YAK1;Q12849-5	GRSF1	28.6597	0.0891109	0.429991	0.671923	n.s.	n.s.	n.s.	-0.458921	-0.239693	-0.219227		n.s.
F5H5P2;P12694;P12694-2;F5GXU9;H0YH31	F5H5P2;P12694;P12694-2;F5GXU9	BCKDHA	32.226	6.02904e-08	0.000127645	0.340816	AvC_do	AvM_do	n.s.	-0.72198	-0.525618	-0.196362	AS specific	changed in MR
F5H619;Q86XA9;Q86XA9-2;H7C5W6;H0YIW3;F8VQQ6;H0YHE0;H0YHS5;Q86XA9-3	F5H619;Q86XA9;Q86XA9-2;H7C5W6	HEATR5A	25.3237	0.000425031	0.122648	0.22927	AvC_up	n.s.	n.s.	2.1653	1.01397	1.15133		n.s.
F5H6U7;Q9Y3E0;F5GWD8;F5GXH6;G3V1U5	F5H6U7;Q9Y3E0;F5GWD8;F5GXH6;G3V1U5	GOLT1B	26.6256	0.100014	0.0199391	0.681821	n.s.	AvM_do	n.s.	-0.434092	-0.642841	0.208749		changed in MR
F5H6Z0;Q00537-2;Q00537;F8VZY6;F8VQZ9;F8W1S5	F5H6Z0;Q00537-2;Q00537	CDK17	25.6275	0.493608	0.996335	0.707524	n.s.	n.s.	n.s.	0.50935	-0.00353019	0.51288		n.s.
F5H8H2;Q03426;F5H092;F5GXC0;A0A1B0GWC2;F5H163;F5H368;A0A1W2PS16;A0A0B4J236;A0A1B0GWF3	F5H8H2;Q03426;F5H092;F5GXC0	MVK	25.0351	0.453407	0.81952	0.808911	n.s.	n.s.	n.s.	0.385236	0.135591	0.249645		n.s.
F6U236;Q9BY11	F6U236;Q9BY11	PACSIN1	24.1948	0.396955	0.395155	0.233757	n.s.	n.s.	n.s.	0.346747	-0.366629	0.713376		n.s.
F6UJY1;Q5T013;J9JIE9;E7EWH8;A0A0A0MTR5;Q5T013-3;H0YB70;F6UJY9;Q5T013-4;H0YB18;Q5T013-2	F6UJY1;Q5T013;J9JIE9;E7EWH8;A0A0A0MTR5;Q5T013-3;H0YB70;F6UJY9;Q5T013-4;H0YB18;Q5T013-2	HYI	25.2392	0.0907756	0.907021	0.344812	n.s.	n.s.	n.s.	0.815109	0.0715566	0.743552		n.s.
F6VCX5;Q16816;Q16816-2;C9J2Q6;C9JME8;F8WD25	F6VCX5;Q16816;Q16816-2;C9J2Q6	PHKG1	26.9714	0.411746	0.0521808	0.505742	n.s.	n.s.	n.s.	-0.412419	-0.968271	0.555853		n.s.
F6WQW2;C9JXG8;C9JGV6;C9JDM3;C9JIC6;F8WCY3;Q5T0Z6;Q9C010;Q9C010-2	F6WQW2;C9JXG8;C9JGV6	RANBP1	27.775	0.597207	0.963064	0.756788	n.s.	n.s.	n.s.	0.173443	-0.0170911	0.190534		n.s.
F8VVA7;P61923;F8W651;P61923-4;F8VYZ4;P61923-5;F8VYK5;F8VXB1;F8VUC5;F8W156;P61923-2;P61923-3;F8VXR1;F8VYE0	F8VVA7;P61923;F8W651;P61923-4;F8VYZ4;P61923-5;F8VYK5;F8VXB1;F8VUC5;F8W156;P61923-2;P61923-3	COPZ1	27.9565	0.0382052	0.928803	0.204685	AvC_do	n.s.	n.s.	-0.555923	-0.0305216	-0.525402		n.s.
F8VXC8;Q8TAQ2-2;Q8TAQ2-3;F8VZW6	F8VXC8;Q8TAQ2-2;Q8TAQ2-3	SMARCC2	24.9835	0.926866	0.205216	0.478361	n.s.	n.s.	n.s.	0.0477509	0.559742	-0.511991		n.s.
F8VXY3;P00973-2;P00973-4;P00973;P00973-3;H0YI20;H0YIB8;F8VPW7;F8VUC8	F8VXY3;P00973-2;P00973-4;P00973;P00973-3;H0YI20	OAS1	25.4466	0.0545224	0.87357	0.274241	n.s.	n.s.	n.s.	1.27682	0.131327	1.1455		n.s.
F8W1A4;P54819-2;P54819;P54819-3;P54819-5;P54819-6;F8VY04;P54819-4;F8VZG5;G3V213;F8VPP1	F8W1A4;P54819-2;P54819;P54819-3;P54819-5;P54819-6;F8VY04;P54819-4;F8VZG5;G3V213	AK2	32.8225	0.000281933	0.680189	0.0221604	AvC_do	n.s.	MvC_do	-0.421977	-0.0578947	-0.364082	shared	n.s.
F8W1B3;Q8WUD6-2;H0YI24	F8W1B3;Q8WUD6-2	CHPT1	25.6747	0.327121	0.690899	0.802284	n.s.	n.s.	n.s.	-0.309021	-0.145128	-0.163893		n.s.
F8W7C6	F8W7C6	RPL10	29.0565	0.0228129	0.0854134	0.847494	AvC_do	n.s.	n.s.	-0.657058	-0.532092	-0.124966		n.s.
F8W7Q4;Q96A26;E9PH05	F8W7Q4;Q96A26;E9PH05	FAM162A	31.9536	0.957284	0.652012	0.830724	n.s.	n.s.	n.s.	-0.00933602	-0.0762664	0.0669304		n.s.
F8W8Z9;Q8N4H5;Q8N4H5-3;Q8N4H5-2;H3BUX3;H0YFG9	F8W8Z9;Q8N4H5;Q8N4H5-3;Q8N4H5-2	TOMM5	25.0086	0.00653265	0.0577785	0.738931	AvC_up	n.s.	n.s.	1.02563	0.766169	0.259463		n.s.
F8W9X7;Q567U6	F8W9X7;Q567U6	CCDC93	25.7576	0.553617	0.392042	0.89426	n.s.	n.s.	n.s.	-0.293411	-0.433047	0.139636		n.s.
F8WCF6;P59998;P59998-3;F8WDD7;A0A0A6YYG9;P59998-2;H7C0A3;R4GN08;P59998-4;F8WE39;F8WDW3	F8WCF6;P59998;P59998-3;F8WDD7;A0A0A6YYG9;P59998-2;H7C0A3	ARPC4-TTLL3	30.2712	0.0560954	0.433021	0.577778	n.s.	n.s.	n.s.	-0.251034	-0.116834	-0.1342		n.s.
F8WD26;J3KP06;E9PMT2;Q8WWI1;A0A0A0MTE2;Q8WWI1-4;Q8WWI1-2;Q8WWI1-5;H0Y424;E9PRJ0;E9PRE3	F8WD26;J3KP06;E9PMT2;Q8WWI1;A0A0A0MTE2;Q8WWI1-4;Q8WWI1-2;Q8WWI1-5;H0Y424	LMO7	31.2172	3.68892e-08	0.170357	0.000922549	AvC_up	n.s.	MvC_up	0.619495	0.155626	0.463869	shared	n.s.
F8WJN3;Q16630-3;Q16630;Q16630-2;F8W084;A0A3B3ISW1	F8WJN3;Q16630-3;Q16630;Q16630-2	CPSF6	25.6478	0.0208291	0.202935	0.626454	AvC_do	n.s.	n.s.	-0.79072	-0.474461	-0.316259		n.s.
G3V0I5;P49821-2;P49821;E9PQP1;E9PPR0;E9PPS5;E9PPE0	G3V0I5;P49821-2;P49821	NDUFV1	34.4687	0.000279981	0.0387559	0.391268	AvC_do	AvM_do	n.s.	-0.404814	-0.244256	-0.160558	AS specific	changed in MR
G3V126;H0YB41	G3V126	ATP6V1H	27.6864	0.109412	0.0317521	0.752139	n.s.	AvM_do	n.s.	-0.322404	-0.452942	0.130538		changed in MR
G3V1L9;Q07157;H0YKB1	G3V1L9;Q07157	TJP1	30.1303	9.01173e-06	0.634208	0.000110226	AvC_up	n.s.	MvC_up	0.424048	-0.0531891	0.477237	shared	n.s.
G3V2U7;P07311;G3V3F8	G3V2U7;P07311	ACYP1	25.5346	0.294894	0.524311	0.882623	n.s.	n.s.	n.s.	0.350826	0.239219	0.111608		n.s.
G3V2W1;Q9UK55	G3V2W1;Q9UK55	SERPINA10	24.5195	0.801644	0.817109	0.785209	n.s.	n.s.	n.s.	0.141671	-0.137624	0.279295		n.s.
G3V325;O75127;C9JJT5;C9JU26;P56134-4;P56134-2;C9JQN9;C9JGL8	G3V325;O75127	ATP5MF-PTCD1	33.3963	1.06591e-05	0.0286637	0.146086	AvC_do	AvM_do	n.s.	-1.13233	-0.583165	-0.549161	AS specific	changed in MR
G3V3G9;Q5TAQ9;V9GY54;Q5TAQ9-2;Q5TAQ8;H0YDY4;V9GYQ9;Q5TAQ6;V9GZ39;Q5TAQ7;Q5TAQ5;V9GYZ9	G3V3G9;Q5TAQ9;V9GY54	DCAF8	25.6635	0.919175	0.737965	0.802737	n.s.	n.s.	n.s.	0.0700798	-0.21826	0.288339		n.s.
G3V3X5;Q14767;G3V511	G3V3X5;Q14767;G3V511	LTBP2	29.1834	1.20933e-08	0.000356012	0.127323	AvC_up	AvM_up	n.s.	3.81263	2.39804	1.41459	AS specific	changed in AS
G3V4C1;P07910-2;B2R5W2;G3V4W0;B4DY08;P07910-4;G3V5X6;G3V3K6;G3V251	G3V4C1;P07910-2;B2R5W2;G3V4W0;B4DY08;P07910-4;G3V5X6;G3V3K6;G3V251	HNRNPC	30.7791	0.204893	0.0824818	0.800152	n.s.	n.s.	n.s.	-0.164423	-0.233651	0.0692276		n.s.
G3V4U0;Q9UBX5;G3XA98;G3V3Y2	G3V4U0;Q9UBX5;G3XA98	FBLN5	30.1268	0.205563	0.0521808	0.0126417	n.s.	n.s.	MvC_up	0.357232	-0.566886	0.924118		n.s.
G3V4Y7;G3V5G2	G3V4Y7	KTN1	27.4627	0.383167	0.350158	0.96717	n.s.	n.s.	n.s.	-0.506859	-0.567691	0.0608323		n.s.
G3V5Z7;P60900;G3V295;P60900-2;G3V3I1;P60900-3;G3V3U4;H0YJC4;G3V4S5;G3V2S7	G3V5Z7;P60900;G3V295;P60900-2;G3V3I1;P60900-3	PSMA6	30.8694	0.919258	0.0189173	0.112341	n.s.	AvM_do	n.s.	-0.0155669	-0.293621	0.278054		changed in MR
G3XAI2;P07942;E7EPA6;E9PCS6;C9J296	G3XAI2;P07942	LAMB1	33.1529	0.000113393	6.70158e-05	0.811181	AvC_do	AvM_do	n.s.	-0.493609	-0.559698	0.0660892	AS specific	changed in MR
G3XAP6;P49747-2;P49747	G3XAP6;P49747-2;P49747	COMP	25.275	0.00165223	0.00283352	0.98743	AvC_up	AvM_up	n.s.	3.40152	3.44359	-0.0420753	AS specific	changed in AS
G5E950;P15502-11;E7EP82	G5E950	ELN	24.7073	0.493464	0.0846824	0.0727343	n.s.	n.s.	n.s.	0.368612	-0.911205	1.27982		n.s.
G5E9Q6;P35080-2;C9J0J7;C9JQ45	G5E9Q6;P35080-2;C9J0J7;C9JQ45	PFN2	27.4916	0.410571	0.325391	0.199433	n.s.	n.s.	n.s.	0.293285	-0.362539	0.655824		n.s.
G5E9W7;G5E9V5;P82650;H7C5F2;P82650-2;H7C5L9;C9J5D8	G5E9W7;G5E9V5;P82650	MRPS22	29.8753	0.00236728	0.0130262	0.862602	AvC_do	AvM_do	n.s.	-0.427134	-0.370945	-0.0561899	AS specific	changed in MR
G5EA03;Q9UPQ0-3	G5EA03;Q9UPQ0-3	LIMCH1	24.2354	0.468085	0.0775668	0.545459	n.s.	n.s.	n.s.	0.298485	0.714124	-0.415639		n.s.
G8JLB6;P31943;E9PCY7;D6RBM0;D6RIU0;D6RFM3;D6RIT2;E7EQJ0;D6RAM1;D6R9T0;E7EN40;D6RDU3;D6RJ04;D6RIH9;H0YB39;E5RGV0;H0YBD7;D6RDL0;H0YBG7;D6RF17;E5RGH4;H0YAQ2;D6R9D3;E5RJ94	G8JLB6;P31943;E9PCY7;D6RBM0;D6RIU0;D6RFM3;D6RIT2	HNRNPH1	30.9209	0.712996	0.662393	0.96863	n.s.	n.s.	n.s.	-0.0455036	-0.0566762	0.0111726		n.s.
H0UI06;P14406;D6R9C3	H0UI06;P14406;D6R9C3	COX7A2	32.6456	0.298555	0.979897	0.567155	n.s.	n.s.	n.s.	0.372189	0.0107142	0.361475		n.s.
Q5QPK2;H0Y368;O60762;Q5QPJ9	Q5QPK2;H0Y368;O60762;Q5QPJ9	DPM1	25.8873	0.0410692	0.0165585	0.825728	AvC_do	AvM_do	n.s.	-0.991277	-1.22935	0.238073	AS specific	changed in MR
P0DP25;P0DP24;P0DP23;H0Y7A7;E7ETZ0;E7EMB3;Q96HY3;G3V361;M0QZ52;F8WBR5;G3V226;G3V479;C9J7T9;P02585	P0DP25;P0DP24;P0DP23;H0Y7A7;E7ETZ0;E7EMB3;Q96HY3;G3V361	CALM3	32.1162	0.69635	0.495273	0.883049	n.s.	n.s.	n.s.	0.113637	0.20051	-0.0868731		n.s.
H0YC42;U3KQQ8;E5RFR7;H0YC44;P55327-8	H0YC42	MRPS28	27.5984	0.956525	0.871699	0.906232	n.s.	n.s.	n.s.	0.0123275	-0.036207	0.0485346		n.s.
H0YDN1	H0YDN1	PLEC	25.9367	0.06619	0.12306	0.935755	n.s.	n.s.	n.s.	-0.829471	-0.740221	-0.0892505		n.s.
H0YFD6;P40939;A0A2R8Y4F5;A0A2R8YG21;A0A2R8Y688;P40939-2	H0YFD6;P40939;A0A2R8Y4F5;A0A2R8YG21	HADHA	36.5923	0.000295202	0.105503	0.223441	AvC_do	n.s.	n.s.	-0.440252	-0.210306	-0.229946		n.s.
H0YI08;Q9Y6F6-5;Q9Y6F6-4;Q9Y6F6;Q9Y6F6-7;Q9Y6F6-3;Q9Y6F6-1;Q9Y6F6-2;Q9Y6F6-6;Q9Y6F6-8;E9PJ61;H0YCL0	H0YI08;Q9Y6F6-5;Q9Y6F6-4;Q9Y6F6;Q9Y6F6-7;Q9Y6F6-3;Q9Y6F6-1;Q9Y6F6-2;Q9Y6F6-6;Q9Y6F6-8	MRVI1	25.79	0.165248	0.859804	0.501483	n.s.	n.s.	n.s.	1.0209	0.159024	0.861878		n.s.
H0YKD8;P46779;P46779-2;P46779-3;H0YMF4;P46779-4;P46779-5;H0YLP6	H0YKD8;P46779;P46779-2;P46779-3;H0YMF4;P46779-4;P46779-5;H0YLP6	RPL28	28.7151	0.0429455	2.73467e-05	0.0613671	AvC_up	AvM_up	n.s.	0.368763	0.85349	-0.484727	AS specific	changed in AS
H0YKJ4;H0YK48;P09493-5;H0YN06	H0YKJ4;H0YK48;P09493-5	TPM1	27.2669	0.95505	0.499775	0.728015	n.s.	n.s.	n.s.	-0.017173	-0.189166	0.171993		n.s.
H0YMV8;Q71UM5;C9JLI6;C9J1C5	H0YMV8;Q71UM5;C9JLI6	RPS27L	27.3639	0.216436	0.838781	0.354954	n.s.	n.s.	n.s.	-0.445014	0.0893148	-0.534329		n.s.
H0YNG3;P67812-4;P67812;P67812-3;H0YKT4;P67812-2;H0YNX5;H0YNA5	H0YNG3;P67812-4;P67812;P67812-3;H0YKT4	SEC11A	26.5864	0.00693308	0.689804	0.144056	AvC_do	n.s.	n.s.	-1.16646	-0.211088	-0.955373		n.s.
H3BMD8;P56211;P56211-2;H3BQ52;H3BTD3	H3BMD8;P56211;P56211-2;H3BQ52;H3BTD3	ARPP19	27.7591	0.117676	0.581374	0.618441	n.s.	n.s.	n.s.	-0.288078	-0.11829	-0.169788		n.s.
H3BNC9;P08708;H0YN88;A0A075B716;H0YN73;A0A0J9YYC4	H3BNC9;P08708;H0YN88;A0A075B716	RPS17	29.7709	3.68892e-08	0.00421595	0.0418896	AvC_do	AvM_do	MvC_do	-0.84579	-0.434315	-0.411475	shared	changed in MR
H3BP20;P06865;H3BS10;H3BU85;H3BTD4;P06865-2;A0A087WUJ7	H3BP20;P06865;H3BS10	HEXA	28.2993	0.0682324	0.937397	0.272876	n.s.	n.s.	n.s.	-0.436589	-0.0228167	-0.413772		n.s.
H3BP28;Q99807;I3L1T0;H3BS11	H3BP28;Q99807	COQ7	30.5702	0.212313	0.946709	0.501222	n.s.	n.s.	n.s.	-0.16525	-0.0107645	-0.154485		n.s.
H3BPE1;H3BQK9;E9PNZ4;E9PLY0;H0Y4F5;H0Y6T5;H0Y7I1;E9PS75	H3BPE1;H3BQK9	MACF1	29.1707	0.00622611	0.0592797	0.725118	AvC_do	n.s.	n.s.	-0.786703	-0.579103	-0.207601		n.s.
H3BRL3;O14562;H3BUM8	H3BRL3;O14562;H3BUM8	UBFD1	26.0153	0.0421191	0.911618	0.223441	AvC_up	n.s.	n.s.	1.08156	0.0748614	1.00669		n.s.
H3BRN4;P80404;H3BNQ7;H3BPW8;H3BMJ9;H3BRJ1;H3BRT1	H3BRN4;P80404;H3BNQ7	ABAT	30.441	0.253805	0.122498	0.833986	n.s.	n.s.	n.s.	-0.562076	-0.785154	0.223078		n.s.
H3BRN7;H3BTY4	H3BRN7;H3BTY4	CLN6	25.9426	0.141794	0.776742	0.525828	n.s.	n.s.	n.s.	0.914845	0.216676	0.698169		n.s.
H3BTH8;Q96S86;H3BRY4;H3BT26;Q86UW8	H3BTH8;Q96S86	HAPLN3	25.3889	0.000102053	0.0267964	0.339395	AvC_up	AvM_up	n.s.	2.32876	1.39416	0.934595	AS specific	changed in AS
H7BYZ3;F6U1T9;D3YTA9;P63098;A0A1B0GUC7;Q96LZ3	H7BYZ3;F6U1T9;D3YTA9;P63098	PPP3R1	26.2475	0.0342535	0.214505	0.697665	AvC_do	n.s.	n.s.	-0.870872	-0.554798	-0.316074		n.s.
H8Y6P7;P0CAP1-11;P0CAP1-2;P0CAP1-7;P0CAP1-6;P0CAP1-8;P0CAP1-5;H3BTD5;H0YCD3	H8Y6P7;P0CAP1-11;P0CAP1-2;P0CAP1-7;P0CAP1-6;P0CAP1-8;P0CAP1-5	GCOM1	30.75	0.000358068	0.00346881	6.48184e-07	AvC_up	AvM_do	MvC_up	0.38278	-0.331674	0.714454	shared	changed in MR
I3L0E3;Q9Y2R5;E9PE17	I3L0E3;Q9Y2R5;E9PE17	hCG_1984214	26.2592	0.133631	0.00308674	0.321618	n.s.	AvM_do	n.s.	-0.761134	-1.5676	0.806464		changed in MR
I3L0N3;P46459;P46459-2;I3L2G1;I3L0L3;K7EQD6;I3L338;I3L4Q9	I3L0N3;P46459;P46459-2	NSF	28.9203	0.979217	0.392199	0.622771	n.s.	n.s.	n.s.	-0.00571617	-0.162328	0.156612		n.s.
I3L448;Q5TC12;A8MRA7;Q5TC12-3;H0YEW4;Q5TC12-2;H0YD21;H0YDD6;E9PPX6;H0YCA6	I3L448;Q5TC12;A8MRA7;Q5TC12-3;H0YEW4;Q5TC12-2;H0YD21	ATPAF1	30.0325	0.213475	0.422364	0.874152	n.s.	n.s.	n.s.	-0.375765	-0.267041	-0.108724		n.s.
I6L894;D6RHE1;A0A087WZU3	I6L894;D6RHE1	ANK2	31.093	0.525647	0.0732455	0.495657	n.s.	n.s.	n.s.	-0.131022	-0.359814	0.228792		n.s.
J3KN01;H0Y9I0	J3KN01	AFDN	27.4258	0.235752	0.00435077	0.258036	n.s.	AvM_do	n.s.	-0.324737	-0.797731	0.472994		changed in MR
J3KN67;D6RGJ6	J3KN67	TPM3	27.5937	0.147612	0.311275	0.878568	n.s.	n.s.	n.s.	0.529293	0.400618	0.128675		n.s.
S4R3Q9;J3KNA0;Q15070-2;Q15070;E7EVY0;C9JC63;Q15070-3	S4R3Q9;J3KNA0;Q15070-2;Q15070;E7EVY0	OXA1L	27.1668	0.279745	0.848061	0.425064	n.s.	n.s.	n.s.	0.268379	-0.0568525	0.325231		n.s.
J3KNF4;O14618;E9PP76;E9PK03	J3KNF4;O14618	CCS	28.4878	0.392512	0.285562	0.908822	n.s.	n.s.	n.s.	0.406214	0.52171	-0.115496		n.s.
J3KNF8	J3KNF8	CYB5B	30.5045	0.866885	0.720444	0.922732	n.s.	n.s.	n.s.	-0.0259264	-0.0543853	0.0284589		n.s.
J3KNQ4;Q9NVD7;E9PS97;Q9NVD7-2	J3KNQ4;Q9NVD7;E9PS97	PARVA	31.2405	0.51479	0.212695	0.173922	n.s.	n.s.	n.s.	0.0905986	-0.172001	0.2626		n.s.
J3KNV4;Q13683-7;Q13683;Q13683-9;Q13683-10;G3V2C6;G3V2I4;H0YJ26	J3KNV4;Q13683-7;Q13683;Q13683-9;Q13683-10	ITGA7	31.8623	0.674892	0.331865	0.781637	n.s.	n.s.	n.s.	-0.0418472	-0.0938523	0.0520051		n.s.
J3KPF0;F8VWT9;Q9Y4D8-4;Q9Y4D8;Q9Y4D8-2;Q9Y4D8-5;Q9Y4D8-3;F8VU57	J3KPF0;F8VWT9;Q9Y4D8-4;Q9Y4D8;Q9Y4D8-2	HECTD4	28.7272	0.358938	0.00084435	0.0702595	n.s.	AvM_do	n.s.	-0.31658	-1.16424	0.847656		changed in MR
J3KPP4;O95232;D6RDI2;E7EN55;C9JL41;O95232-2;D6RHH0;U3KQT3;H0YA81	J3KPP4;O95232;D6RDI2	LUC7L3	24.9721	0.196258	0.0671405	0.769428	n.s.	n.s.	n.s.	-0.460313	-0.675875	0.215562		n.s.
J3KPV1;Q9BUK0;Q9BUK0-2;Q9BUK0-4;E5RJ08;E5RHM5;E5RFN2;E5RII1	J3KPV1;Q9BUK0;Q9BUK0-2;Q9BUK0-4	CHCHD7	26.5367	0.0347836	0.0124125	0.806479	AvC_do	AvM_do	n.s.	-1.13276	-1.4205	0.287744	AS specific	changed in MR
J3KQ32;Q9NTK5;Q9NTK5-3;Q9NTK5-2;C9JTK6;C9JCJ9	J3KQ32;Q9NTK5;Q9NTK5-3;Q9NTK5-2	OLA1	31.9045	0.0182366	0.145485	0.682925	AvC_do	n.s.	n.s.	-0.240684	-0.159362	-0.0813223		n.s.
J3KQ48;Q9Y3E5	J3KQ48;Q9Y3E5	PTRH2	26.1445	0.00185941	0.103586	0.428267	AvC_do	n.s.	n.s.	-1.05244	-0.591154	-0.461287		n.s.
J3KQA9;Q5JR59;Q5JR59-4	J3KQA9;Q5JR59;Q5JR59-4	MTUS2	28.1393	0.160836	0.16296	0.978487	n.s.	n.s.	n.s.	-0.460989	-0.482864	0.0218752		n.s.
J3KQJ1;Q8NBJ7;A8MXB9;Q8NBJ7-2;E9PBT8;C9JL30;C9J660;J3QT17;H7C3B2;F8WA42;Q8NBJ7-5;Q8NBJ7-3;F8WEX5;E9PG02;F8WEV7;F8WES7;Q8NBJ7-4	J3KQJ1;Q8NBJ7;A8MXB9;Q8NBJ7-2;E9PBT8;C9JL30;C9J660;J3QT17;H7C3B2;F8WA42;Q8NBJ7-5;Q8NBJ7-3	SUMF2	25.3391	0.483935	0.0436475	0.413887	n.s.	AvM_do	n.s.	-0.450463	-1.27652	0.826056		changed in MR
J3KQL8	J3KQL8	APOL2	24.3136	0.694693	0.572844	0.536525	n.s.	n.s.	n.s.	0.146237	-0.215232	0.361469		n.s.
J3KQN4;H0Y5B4;H7BZ11;P83881;H7BY91;H0Y3V9	J3KQN4;H0Y5B4;H7BZ11;P83881	RPL36A	24.5121	0.915792	0.290777	0.45705	n.s.	n.s.	n.s.	-0.0636851	0.531425	-0.59511		n.s.
J3KR35;Q8WUD4;C9JUN5;S4R331	J3KR35;Q8WUD4;C9JUN5	CCDC12	25.2914	0.0123946	0.17756	0.575236	AvC_up	n.s.	n.s.	1.88182	1.10001	0.781814		n.s.
J3KR44;Q96FW1;F5H6Q1;F5GYJ8;F5H3F0	J3KR44;Q96FW1;F5H6Q1;F5GYJ8;F5H3F0	OTUB1	30.2995	0.216299	0.77331	0.631563	n.s.	n.s.	n.s.	0.147803	0.0419374	0.105866		n.s.
J3KSS5;Q6QEF8-4;Q6QEF8-3;J3QRV4;K7ERF4	J3KSS5;Q6QEF8-4;Q6QEF8-3	CORO6	25.9247	0.858915	0.689804	0.906699	n.s.	n.s.	n.s.	0.11374	0.253056	-0.139316		n.s.
J3KTL2;Q07955;Q07955-3;Q07955-2;J3KSR8;J3QQV5;J3KSW7	J3KTL2;Q07955;Q07955-3;Q07955-2	SRSF1	27.7133	0.486687	0.832487	0.827369	n.s.	n.s.	n.s.	0.194438	0.0687865	0.125652		n.s.
J3QL71;Q96FV2;Q96FV2-2;J3QQM9;J3QRJ1;J3QR84;J3KT79;J3KS57	J3QL71;Q96FV2;Q96FV2-2;J3QQM9;J3QRJ1	SCRN2	29.1039	0.361078	0.985428	0.594655	n.s.	n.s.	n.s.	0.19707	-0.00467039	0.201741		n.s.
J3QLS3;Q9Y2R9;J3QQS1;J3KSI8;J3QKW2	J3QLS3;Q9Y2R9;J3QQS1;J3KSI8;J3QKW2	MRPS7	29.4476	0.0460313	0.0152161	0.791051	AvC_do	AvM_do	n.s.	-0.344244	-0.442819	0.0985755	AS specific	changed in MR
J3QRS3;P19105;J3KTJ1	J3QRS3;P19105;J3KTJ1	MYL12A	32.5282	0.312278	0.368097	0.980641	n.s.	n.s.	n.s.	-0.261573	-0.248616	-0.0129577		n.s.
J3QRT5;P13598;J3QQR8;J3QQX6;J3QRQ1;J3QKR4	J3QRT5;P13598;J3QQR8;J3QQX6;J3QRQ1;J3QKR4	ICAM2	26.2743	1.31737e-05	0.000956579	0.633021	AvC_do	AvM_do	n.s.	-1.58134	-1.25873	-0.322609	AS specific	changed in MR
J3QRU1;P07947;Q573B4;P06239;P06239-3	J3QRU1;P07947	YES1	25.7226	0.00976862	0.0045724	0.851005	AvC_do	AvM_do	n.s.	-0.819006	-0.954135	0.135129	AS specific	changed in MR
J3QTA6;Q9BRQ6;J3QTB2;H0Y922	J3QTA6;Q9BRQ6;J3QTB2;H0Y922	CHCHD6	28.4185	0.15212	0.0126647	0.512203	n.s.	AvM_up	n.s.	0.415612	0.749929	-0.334316		changed in AS
J3QW43;J3QS48;I3L295;J3KTK8;J3QQZ4;J3KT75;J3QRD5;O75352-2;O75352;J3KSI4;I3L405;I3L261;I3L1D2;I3L4E0	J3QW43;J3QS48;I3L295;J3KTK8;J3QQZ4;J3KT75;J3QRD5;O75352-2;O75352	MPDU1	24.9614	0.0503757	0.450761	0.545139	n.s.	n.s.	n.s.	-0.736176	-0.323437	-0.412739		n.s.
K7EKE6;P36776-2;P36776;K7EJE8;P36776-3;K7ER27;K7ERR6;K7EQF8;K7ER56	K7EKE6;P36776-2;P36776;K7EJE8;P36776-3	LONP1	33.3996	7.67621e-05	0.00639326	0.541027	AvC_do	AvM_do	n.s.	-0.438946	-0.316679	-0.122267	AS specific	changed in MR
K7ELC2;P62841;K7EM56;A0A0B4J2B4;S4R417;K7EQJ5;K7EJ78;S4R456	K7ELC2;P62841;K7EM56;A0A0B4J2B4;S4R417;K7EQJ5	RPS15	29.5901	0.00046977	0.00735949	0.746204	AvC_do	AvM_do	n.s.	-1.61589	-1.3068	-0.309092	AS specific	changed in MR
K7ELG9;Q3MHD2;Q3MHD2-2	K7ELG9;Q3MHD2;Q3MHD2-2	LSM12	25.4323	0.929433	0.886227	0.898113	n.s.	n.s.	n.s.	0.0662291	-0.107595	0.173824		n.s.
K7ELL7;P14314;K7EPW7;K7EKX1;K7EJ70;K7EIP3;K7EL27	K7ELL7;P14314;K7EPW7	PRKCSH	31.3826	0.213475	0.35011	0.119034	n.s.	n.s.	n.s.	0.135961	-0.110601	0.246562		n.s.
K7EMC9;Q969T9;K7ENL2;A6NG10;Q969T9-2;K7EIJ0;K7EIN1;K7ESN4;K7EIK1	K7EMC9;Q969T9;K7ENL2;A6NG10;Q969T9-2;K7EIJ0	WBP2	28.4887	0.445197	0.337114	0.918179	n.s.	n.s.	n.s.	0.140436	0.181389	-0.0409531		n.s.
K7EMR7;O75298-3;O75298;O75298-2;Q7RTN0	K7EMR7;O75298-3;O75298;O75298-2;Q7RTN0	RTN2	28.0747	0.0157543	0.0132065	0.930625	AvC_do	AvM_do	n.s.	-0.589067	-0.640505	0.0514389	AS specific	changed in MR
K7ENI6;K7ERE1;Q8N2U0	K7ENI6;K7ERE1;Q8N2U0	TMEM256-PLSCR3	27.792	0.060144	0.710525	0.392706	n.s.	n.s.	n.s.	-1.07726	-0.256166	-0.821093		n.s.
K7ERC8;Q06136;Q06136-2;K7EQS7	K7ERC8;Q06136;Q06136-2;K7EQS7	KDSR	26.9158	0.731114	0.049617	0.0863775	n.s.	AvM_up	n.s.	-0.121783	0.63696	-0.758743		changed in AS
K7ERG9;P00746	K7ERG9;P00746	CFD	26.3985	0.000691274	0.540365	0.00208648	AvC_up	n.s.	MvC_up	1.87642	-0.39835	2.27477	shared	n.s.
L0R6P0;P86397;A0A087WTC8	L0R6P0;P86397	RPP14	25.3358	0.889592	0.134945	0.399929	n.s.	n.s.	n.s.	0.0987158	0.894543	-0.795828		n.s.
L0R6Q1	L0R6Q1	SLC35A4	26.7193	0.0952474	0.138693	0.969537	n.s.	n.s.	n.s.	-0.59909	-0.563872	-0.0352182		n.s.
M0QYZ2;M0R0N4;P53680;X6R390;P53680-2;M0QZ21;M0R1S0	M0QYZ2;M0R0N4;P53680;X6R390;P53680-2;M0QZ21	AP2S1	27.1953	0.596034	0.468045	0.916935	n.s.	n.s.	n.s.	-0.159888	-0.225514	0.0656266		n.s.
M0QZ43;P23327	M0QZ43;P23327	HRC	32.8584	0.0205594	0.13121	0.735486	AvC_up	n.s.	n.s.	0.432254	0.302354	0.1299		n.s.
M0R0P8;Q13459-2;Q13459;M0R300;M0QZY4;M0R2J3;M0R240;M0R332;M0QXP0	M0R0P8;Q13459-2;Q13459;M0R300	MYO9B	25.7421	0.0504658	0.282661	0.690807	n.s.	n.s.	n.s.	1.15223	0.692768	0.459457		n.s.
M0R117;Q02543;M0R3D6;M0R1A7;M0R0P7	M0R117;Q02543;M0R3D6;M0R1A7;M0R0P7	RPL18A	27.9249	0.00416511	0.413068	0.214026	AvC_do	n.s.	n.s.	-0.709309	-0.23052	-0.478789		n.s.
M0R208;Q16740;A0A2R8YEF5	M0R208;Q16740	CLPP	26.4834	0.950737	0.31708	0.57683	n.s.	n.s.	n.s.	-0.0279822	-0.394371	0.366389		n.s.
M0R2A0;Q5UCC4-2;Q5UCC4	M0R2A0;Q5UCC4-2;Q5UCC4	EMC10	26.4174	0.416683	0.957405	0.617482	n.s.	n.s.	n.s.	-0.185451	0.0141911	-0.199642		n.s.
M0R2Z9;Q8IX01-4;Q8IX01;Q8IX01-3;M0R3F6;M0R065;M0R216;M0R2Y3	M0R2Z9;Q8IX01-4;Q8IX01;Q8IX01-3;M0R3F6	SUGP2	26.1748	0.163609	0.288036	0.909704	n.s.	n.s.	n.s.	-0.645782	-0.529364	-0.116419		n.s.
O00116;A0A1B0GWA2;A0A2R8YEL0;B8ZZ81	O00116;A0A1B0GWA2;A0A2R8YEL0	AGPS	26.7146	0.10564	0.57343	0.60123	n.s.	n.s.	n.s.	-0.61017	-0.247647	-0.362523		n.s.
O00142-2;O00142;O00142-6;H3BP77;A0A0A0MSY7;O00142-3;O00142-4;O00142-5;J3KS73;J3QRP0;J3QL12;J3KRW8	O00142-2;O00142;O00142-6;H3BP77;A0A0A0MSY7;O00142-3;O00142-4;O00142-5	TK2	24.5911	0.770465	0.928803	0.837404	n.s.	n.s.	n.s.	-0.166334	0.0551327	-0.221467		n.s.
O00151	O00151	PDLIM1	33.5119	0.00561714	0.0955503	0.602642	AvC_up	n.s.	n.s.	0.362724	0.234642	0.128083		n.s.
O00159;F5H6E2;I3L501	O00159;F5H6E2	MYO1C	32.7393	0.683145	0.000467366	0.0148555	n.s.	AvM_do	MvC_up	-0.0448127	-0.361235	0.316422	MR sepcific	changed in MR
O00161;O00161-2;H3BNE1;H3BR18;H3BM38;H3BPJ0;H3BV99;H3BP15;H3BQY9;H3BNG6;H3BU94;H3BR99	O00161;O00161-2;H3BNE1;H3BR18;H3BM38;H3BPJ0;H3BV99;H3BP15;H3BQY9	SNAP23	26.9474	0.159646	0.780904	0.549024	n.s.	n.s.	n.s.	0.444523	0.107677	0.336846		n.s.
O00165;O00165-2;O00165-5;O00165-3;E9PIQ7;Q5VYD6;O00165-4;O00165-6	O00165;O00165-2;O00165-5;O00165-3;E9PIQ7	HAX1	27.1028	0.142286	0.480161	0.74174	n.s.	n.s.	n.s.	-0.581357	-0.317467	-0.263891		n.s.
O00170;E9PMH2;V9GYQ3	O00170;E9PMH2	AIP	26.6544	0.385457	0.119377	0.712577	n.s.	n.s.	n.s.	-0.273738	-0.492671	0.218933		n.s.
O00178;B0QY59;F5H716;F5H257	O00178	GTPBP1	24.8104	0.667831	0.435225	0.862602	n.s.	n.s.	n.s.	-0.224057	-0.405586	0.181529		n.s.
O00186	O00186	STXBP3	28.1004	0.0395222	9.80356e-05	0.14238	AvC_do	AvM_do	n.s.	-0.313129	-0.649269	0.336139	AS specific	changed in MR
O00203-3;O00203;H0YBD0;F5GYB0	O00203-3;O00203	AP3B1	27.6062	0.0560108	0.0588497	0.972547	n.s.	n.s.	n.s.	-0.450785	-0.47084	0.0200552		n.s.
O00214-2;O00214;E9PN19;F6V2D4;B1ANM0;H7BXD8;Q5T3P9;E9PJ77;E9PRN3;E9PNC2	O00214-2;O00214;E9PN19;F6V2D4;B1ANM0;H7BXD8;Q5T3P9	LGALS8	25.7574	0.31055	0.309142	0.146086	n.s.	n.s.	n.s.	-0.404581	0.429075	-0.833656		n.s.
O00217;E9PPW7;E9PKH6;E9PN51;F8W9K7;H0YDT4;Q08E91	O00217;E9PPW7;E9PKH6;E9PN51;F8W9K7	NDUFS8	32.67	1.13983e-06	0.0264063	0.0576153	AvC_do	AvM_do	n.s.	-0.696237	-0.323733	-0.372504	AS specific	changed in MR
O00231;O00231-2;J3QRY4;J3QS13;J3KSW3	O00231;O00231-2	PSMD11	30.758	0.236988	0.00841895	0.346174	n.s.	AvM_do	n.s.	-0.177989	-0.404378	0.226389		changed in MR
O00232;J3KTJ5;J3KSK1	O00232	PSMD12	29.9845	0.00743396	0.00379713	0.860856	AvC_do	AvM_do	n.s.	-0.371079	-0.427363	0.056284	AS specific	changed in MR
O00233;J3KN29;F5H5V4;F5GX23;O00233-2;F5H7X1;O00233-3;F5H169	O00233;J3KN29;F5H5V4;F5GX23;O00233-2;F5H7X1;O00233-3	PSMD9	27.6656	0.126154	0.00540395	0.417466	n.s.	AvM_up	n.s.	0.347246	0.65689	-0.309644		changed in AS
O00264;O00264-2	O00264;O00264-2	PGRMC1	26.1782	0.203321	0.0240852	0.552265	n.s.	AvM_do	n.s.	-0.572295	-1.04553	0.473231		changed in MR
O00273;O00273-2;K7ERT1	O00273;O00273-2	DFFA	24.6305	0.382975	0.310479	0.178889	n.s.	n.s.	n.s.	-0.378538	0.455797	-0.834335		n.s.
O00291-3;O00291	O00291-3;O00291	HIP1	25.7504	0.132851	0.0923352	0.90733	n.s.	n.s.	n.s.	-0.663827	-0.779117	0.115291		n.s.
O00299	O00299	CLIC1	30.4989	0.0605736	0.130742	0.906232	n.s.	n.s.	n.s.	0.252053	0.215941	0.0361118		n.s.
O00303;H0YDT6;E9PQV8;A0A1W2PP79	O00303	EIF3F	29.6961	0.000312498	0.113373	0.21625	AvC_do	n.s.	n.s.	-0.711892	-0.334222	-0.37767		n.s.
O00330-3;O00330;E9PRI6;O00330-2;H0YD97	O00330-3;O00330	PDHX	33.4592	0.153505	0.156507	0.978487	n.s.	n.s.	n.s.	0.142839	0.149309	-0.00646963		n.s.
O00339-2;H0YBJ4;H0YBU5	O00339-2;H0YBJ4	MATN2	27.3929	0.000642933	0.524362	0.0018071	AvC_up	n.s.	MvC_up	2.0986	-0.459856	2.55845	shared	n.s.
O00391;O00391-2;A8MXT8;H0Y5Z8	O00391;O00391-2	QSOX1	25.6108	0.680021	0.635067	0.571843	n.s.	n.s.	n.s.	0.279714	-0.337021	0.616735		n.s.
O00410;H0Y8C6;O00410-2;E7ETV3;E7EQT5;C9JMV5;C9JZD8;E7ETV8;C9JZ53	O00410;H0Y8C6;O00410-2	IPO5	32.3356	0.016313	0.0393782	0.933729	AvC_do	AvM_do	n.s.	-0.338586	-0.309754	-0.0288316	AS specific	changed in MR
O00429;O00429-3;O00429-5;O00429-7;F8VZ52;B4DDQ3;B4DPZ9;F8W1W3;F8VR28;H0YHY4	O00429;O00429-3;O00429-5;O00429-7	DNM1L	32.4246	0.142757	0.160163	0.992876	n.s.	n.s.	n.s.	-0.179439	-0.181476	0.00203717		n.s.
O00429-2;O00429-4	O00429-2;O00429-4	DNM1L	25.1554	0.334605	0.0661386	0.617482	n.s.	n.s.	n.s.	0.563767	1.08594	-0.522174		n.s.
O00442;O00442-2;A6NIC1	O00442;O00442-2	RTCA	28.6617	0.000308015	0.0240422	0.492166	AvC_do	AvM_do	n.s.	-0.901654	-0.596828	-0.304826	AS specific	changed in MR
O00461;F8W785	O00461;F8W785	GOLIM4	26.5279	0.0228129	0.804125	0.0735421	AvC_up	n.s.	n.s.	0.656886	-0.0902294	0.747115		n.s.
O00468-6;O00468-3;O00468-7;O00468-5;O00468-4;O00468;A0A087X208;O00468-2;H0Y5U1	O00468-6;O00468-3;O00468-7;O00468-5;O00468-4;O00468;A0A087X208;O00468-2	AGRN	30.3627	0.669392	0.282428	0.296931	n.s.	n.s.	n.s.	0.0848502	-0.204882	0.289732		n.s.
O00471;A0A0A0MSI8;F8W9B8;G3V377;G3V4Z7	O00471;A0A0A0MSI8;F8W9B8	EXOC5	26.9141	0.103874	0.00256563	0.342235	n.s.	AvM_do	n.s.	-0.658086	-1.28347	0.625387		changed in MR
O00478-2;O00478;C9JZT5;C9JUV8;C9JQT8;C9JNZ3;E9PRX1;C9JVU4;C9J3Q8;C9J877;E9PJE9;E9PFB8;E7EPR2	O00478-2;O00478;C9JZT5;C9JUV8	BTN3A3	24.4646	0.294698	0.00275813	0.166626	n.s.	AvM_do	n.s.	-0.394953	-1.14823	0.753272		changed in MR
O00479	O00479	HMGN4	24.9225	0.00483969	0.0382087	0.782284	AvC_up	AvM_up	n.s.	1.2678	0.998881	0.268914	AS specific	changed in AS
O00483	O00483	NDUFA4	33.5525	0.755933	0.288036	0.680483	n.s.	n.s.	n.s.	0.0567221	0.181938	-0.125216		n.s.
O00487;C9JW37	O00487	PSMD14	29.0111	3.83018e-05	0.000744042	0.798648	AvC_do	AvM_do	n.s.	-1.1673	-1.01224	-0.155058	AS specific	changed in MR
O00499-9;O00499-7;O00499-4;O00499-6;O00499-3;O00499-2;O00499-5;O00499;O00499-10;O00499-8;O00499-11;S4R418	O00499-9;O00499-7;O00499-4;O00499-6;O00499-3;O00499-2;O00499-5;O00499;O00499-10;O00499-8;O00499-11	BIN1	25.4712	0.308398	0.798595	0.417466	n.s.	n.s.	n.s.	0.52524	-0.158135	0.683375		n.s.
O00505;H0Y4S9	O00505	KPNA3	27.423	0.423918	0.0848309	0.0581961	n.s.	n.s.	n.s.	-0.205995	0.441012	-0.647007		n.s.
O00560;O00560-3;B4DHN5;E9PBU7	O00560;O00560-3;B4DHN5;E9PBU7	SDCBP	29.2852	1.56015e-06	7.99223e-05	0.763609	AvC_do	AvM_do	n.s.	-1.03699	-0.904795	-0.132191	AS specific	changed in MR
O00560-2;G5EA09	O00560-2;G5EA09	SDCBP	25.6245	4.19421e-06	0.012105	0.165572	AvC_do	AvM_do	n.s.	-1.32423	-0.740213	-0.584021	AS specific	changed in MR
O00567;H0YDU4;H0Y653;Q5JXT2	O00567	NOP56	26.451	0.0235954	0.0359908	0.991837	AvC_do	AvM_do	n.s.	-1.14276	-1.13085	-0.0119114	AS specific	changed in MR
O00592-2;O00592	O00592-2;O00592	PODXL	27.1606	0.188987	0.653215	0.680483	n.s.	n.s.	n.s.	-0.486173	-0.196509	-0.289664		n.s.
O00625	O00625	PIR	25.6978	0.0160675	0.0588249	0.862804	AvC_do	n.s.	n.s.	-0.970595	-0.810657	-0.159938		n.s.
O00629;H7C4F6	O00629	KPNA4	30.307	0.872507	0.732576	0.771308	n.s.	n.s.	n.s.	0.0275172	-0.0579167	0.0854339		n.s.
O00743;O00743-3;O00743-2;Q5T1S7	O00743;O00743-3;O00743-2	PPP6C	25.0512	0.706326	0.371968	0.394911	n.s.	n.s.	n.s.	-0.194859	0.44682	-0.641679		n.s.
O00748;O00748-4;O00748-2;O00748-5;J3QSC0;J3QLP1;A0A0C4DGH1;A0A3B3ITR8;Q5XG92-4;Q5XG92-6;Q5XG92-2;Q5XG92	O00748;O00748-4;O00748-2;O00748-5;J3QSC0	CES2	30.9364	0.765195	0.0898569	0.151028	n.s.	n.s.	n.s.	-0.0785247	0.405702	-0.484226		n.s.
O00763;O00763-3;O00763-2;F8W8T8;H0YGH5;A0A087WUA1;S4R3S7;A0A087X0W4;F5H5C3;A0A087WVR6	O00763;O00763-3;O00763-2	ACACB	27.3272	0.0244892	0.203131	0.654387	AvC_do	n.s.	n.s.	-0.739596	-0.455355	-0.284241		n.s.
O00764;F2Z2Y4;O00764-3;O00764-2;A8MV33	O00764;F2Z2Y4;O00764-3;O00764-2	PDXK	30.7544	0.0194943	0.278267	0.52813	AvC_do	n.s.	n.s.	-0.548418	-0.28024	-0.268178		n.s.
O14495;A0A286YF41;A0A286YEZ7;A0A286YES4	O14495	PLPP3	25.5021	0.793606	0.437635	0.790073	n.s.	n.s.	n.s.	-0.111822	-0.318929	0.207107		n.s.
O14498;H0YN67;H0YL90	O14498;H0YN67;H0YL90	ISLR	26.3538	0.00889512	0.771131	0.033519	AvC_up	n.s.	MvC_up	2.3083	-0.323337	2.63164	shared	n.s.
O14521;H0YD41;G3V173;E9PK73;H3BRW5;O14521-2;O14521-4;H0YD96;A0A1W2PNY0;O14521-3	O14521;H0YD41;G3V173;E9PK73;H3BRW5;O14521-2;O14521-4	SDHD	29.4576	0.0671405	0.186534	0.857819	n.s.	n.s.	n.s.	0.417537	0.324026	0.0935108		n.s.
O14531;Q5T0Q6	O14531;Q5T0Q6	DPYSL4	26.3496	0.572556	0.521044	0.963994	n.s.	n.s.	n.s.	-0.300974	-0.360978	0.0600043		n.s.
O14548;E5RJZ1;H0YBD2;E5RFH8	O14548;E5RJZ1;H0YBD2	COX7A2L	30.723	0.779243	0.324625	0.700253	n.s.	n.s.	n.s.	-0.058907	-0.194696	0.135789		n.s.
O14558;A0A1X7SC65;K7EP04	O14558;A0A1X7SC65;K7EP04	HSPB6	34.7408	0.000112412	0.125885	0.133041	AvC_up	n.s.	n.s.	0.804929	0.339097	0.465832		n.s.
O14561;H3BNK3	O14561;H3BNK3	NDUFAB1	29.4252	0.1128	0.754941	0.492166	n.s.	n.s.	n.s.	-0.581212	-0.140205	-0.441007		n.s.
O14576-2;O14576-3;O14576;O14576-4;O14576-5;A0A0A0MTG2;C9J3E7;E5RJ75;E5RFE1	O14576-2;O14576-3;O14576;O14576-4;O14576-5;A0A0A0MTG2	DYNC1I1	26.401	0.115812	0.0502798	0.827333	n.s.	n.s.	n.s.	0.469317	0.613095	-0.143778		n.s.
O14579;M0QXB4;O14579-2;O14579-3;M0R061	O14579;M0QXB4;O14579-2;O14579-3	COPE	28.97	0.11715	0.621748	0.589009	n.s.	n.s.	n.s.	-0.349523	-0.129508	-0.220014		n.s.
O14617-5;O14617;O14617-2;O14617-4;A0A2R8Y611;O14617-3;A0A2R8Y4J3;A0A087WYN6;K7ELX8;K7ERW8	O14617-5;O14617;O14617-2;O14617-4;A0A2R8Y611;O14617-3	AP3D1	25.9916	0.678229	0.2455	0.685927	n.s.	n.s.	n.s.	-0.165002	-0.439736	0.274733		n.s.
O14639-6	O14639-6	ABLIM1	33.5195	0.00340319	0.546701	0.142762	AvC_up	n.s.	n.s.	0.303286	0.0736357	0.22965		n.s.
O14672;O14672-2;H3BS53;H0YK87;C9J9B4;H0YNC5	O14672;O14672-2	ADAM10	24.3277	0.973234	0.958042	0.992204	n.s.	n.s.	n.s.	-0.0132085	-0.0199883	0.00677983		n.s.
O14734;E9PJN0;E9PRD4;H7C5A7;E9PMC4;E9PIS4;Q9BR14;F6VBM3;H0Y698	O14734;E9PJN0;E9PRD4;H7C5A7	ACOT8	24.4054	0.00762218	0.846309	0.101008	AvC_do	n.s.	n.s.	-0.994689	-0.0909326	-0.903756		n.s.
O14735;B3KY94;O14735-3;H3BUR9;O14735-2	O14735;B3KY94;O14735-3;H3BUR9	CDIPT	28.4104	0.942709	0.0680205	0.237789	n.s.	n.s.	n.s.	-0.0247703	-0.518717	0.493947		n.s.
O14737;O14737-2;K7ESJ4;Q3HM38;X6R2P6	O14737;O14737-2	PDCD5	29.1401	0.493608	0.497771	0.354673	n.s.	n.s.	n.s.	-0.16412	0.173804	-0.337924		n.s.
O14744;O14744-2;O14744-5;O14744-3;O14744-4;H0YJX6;G3V580;G3V5L5;G3V2X6;G3V2L6;H7BZ44;C9JSX3;H0YJ77;H0YJD3;G3V5T6;G3V507;H0YJY6;G3V2F5	O14744;O14744-2;O14744-5;O14744-3;O14744-4;H0YJX6	PRMT5	28.9586	0.858413	0.099237	0.351107	n.s.	n.s.	n.s.	-0.0441716	-0.353487	0.309316		n.s.
O14773;A0A2R8YGD1;A0A2R8YD45;O14773-2;A0A2R8Y7U1;A0A2R8Y7I4;A0A2R8YDY1;E7EV34;A0A2R8YD72;A0A2R8YE64	O14773;A0A2R8YGD1;A0A2R8YD45;O14773-2;A0A2R8Y7U1	TPP1	32.6893	0.00332668	0.22331	0.328734	AvC_do	n.s.	n.s.	-0.559449	-0.253568	-0.305881		n.s.
O14786;E9PEP6;E7EX60;Q5T7F0;O14786-3;O14786-2;Q5JWQ6;Q5JWQ4;H0Y4A0;Q5JWQ2;V9GYL7	O14786;E9PEP6;E7EX60;Q5T7F0;O14786-3;O14786-2;Q5JWQ6;Q5JWQ4	NRP1	28.1503	0.196257	0.0531659	0.717117	n.s.	n.s.	n.s.	-0.333101	-0.516813	0.183713		n.s.
O14787-2;O14787;A0A075B780;K7ESC1;K7ENW1;K7EMA3	O14787-2;O14787;A0A075B780	TNPO2	25.7791	0.0257256	0.105882	0.826449	AvC_do	n.s.	n.s.	-1.06629	-0.830946	-0.235341		n.s.
O14791;O14791-3;O14791-2;B1AH96;B1AH94;B1AH95;F8WCH3;F8WB77	O14791;O14791-3;O14791-2;B1AH96	APOL1	26.9008	0.250927	0.58094	0.806221	n.s.	n.s.	n.s.	0.841134	0.461445	0.379688		n.s.
O14807;C9J8Q6;O14807-2;C9J601	O14807;C9J8Q6;O14807-2	MRAS	26.7982	0.741445	0.341705	0.745917	n.s.	n.s.	n.s.	-0.157142	-0.430611	0.273469		n.s.
O14818;H0Y586;O14818-4;Q8TAA3-2;Q8TAA3-5;Q8TAA3;A0A087WYS6	O14818;H0Y586;O14818-4	PSMA7	31.3353	0.037102	2.78105e-06	0.0187102	AvC_do	AvM_do	MvC_up	-0.182012	-0.46229	0.280278	divergent	changed in MR
O14828;O14828-2	O14828;O14828-2	SCAMP3	28.159	0.0172565	0.0593336	0.87032	AvC_do	n.s.	n.s.	-0.377226	-0.317396	-0.0598298		n.s.
O14841;A0A087WY99	O14841	OPLAH	29.8725	0.410571	0.0935231	0.633021	n.s.	n.s.	n.s.	-0.263594	-0.533862	0.270268		n.s.
O14867;C9IYH8;C9JMP6;C9IYR0	O14867	BACH1	26.1263	0.14738	0.111096	0.922583	n.s.	n.s.	n.s.	-0.9012	-1.04092	0.139722		n.s.
O14874;O14874-3;O14874-2;H3BTL2;H3BS02;H3BNP3;H3BQP2;H3BUV3	O14874;O14874-3;O14874-2;H3BTL2;H3BS02	BCKDK	29.7664	5.38179e-06	0.0010119	0.51224	AvC_do	AvM_do	n.s.	-0.85491	-0.640646	-0.214264	AS specific	changed in MR
Q5VV89;O14880;Q5VV87	Q5VV89;O14880;Q5VV87	MGST3	32.8989	0.394776	0.276262	0.16418	n.s.	n.s.	n.s.	-0.193665	0.254475	-0.44814		n.s.
O14907;A0A087X282	O14907;A0A087X282	TAX1BP3	30.1073	0.0231341	0.952147	0.146086	AvC_up	n.s.	n.s.	0.403698	0.013485	0.390213		n.s.
O14908;O14908-2;K7EM11;K7ESN1;K7ELJ2	O14908;O14908-2;K7EM11	GIPC1	24.3058	0.394235	0.289561	0.910858	n.s.	n.s.	n.s.	0.376519	0.481347	-0.104828		n.s.
O14925;B4DDK6	O14925	TIMM23	27.1916	0.0834844	0.437635	0.654354	n.s.	n.s.	n.s.	-0.924934	-0.46818	-0.456754		n.s.
O14949	O14949	UQCRQ	31.9346	0.00238816	0.936189	0.0233657	AvC_do	n.s.	MvC_do	-0.581199	0.0192319	-0.600431	shared	n.s.
O14950	O14950	MYL12B	24.5925	1.7253e-05	0.178049	0.0380051	AvC_do	n.s.	MvC_do	-1.8502	-0.616102	-1.2341	shared	n.s.
O14957	O14957	UQCR11	30.5638	0.00131371	0.276262	0.190418	AvC_do	n.s.	n.s.	-1.41133	-0.526612	-0.884722		n.s.
O14958;O14958-2	O14958;O14958-2	CASQ2	35.5937	0.00705049	0.871732	0.0403371	AvC_do	n.s.	MvC_do	-0.427345	0.0321551	-0.4595	shared	n.s.
O14964;O14964-2;I3L1P5;I3L1E3;I3L165;I3L2H4	O14964;O14964-2;I3L1P5	HGS	26.7218	0.269857	0.925202	0.470357	n.s.	n.s.	n.s.	-0.416635	0.0440164	-0.460652		n.s.
O14967;O14967-2;D6RAZ4	O14967;O14967-2	CLGN	29.8509	0.176365	0.152138	0.953715	n.s.	n.s.	n.s.	-0.29181	-0.324399	0.0325884		n.s.
O14972-2;O14972;A8MTY9;A8MY26	O14972-2;O14972;A8MTY9;A8MY26	DSCR3	26.6879	0.0754546	0.774681	0.394911	n.s.	n.s.	n.s.	-0.573059	-0.11489	-0.458169		n.s.
O14974;O14974-5;O14974-3;O14974-2;H0YHI8;H0YIS3;A0A0U1RQZ1;H0YHL8;H0YIL7	O14974;O14974-5;O14974-3;O14974-2	PPP1R12A	29.8891	0.257027	0.341342	0.136896	n.s.	n.s.	n.s.	0.2072	-0.186484	0.393684		n.s.
O14980;C9JKM9;C9IZS4;C9JQ02;C9JV99;F8WF71;C9JF49;C9IYM2	O14980	XPO1	29.6776	0.0716947	0.0585662	0.937377	n.s.	n.s.	n.s.	-0.503264	-0.556917	0.0536531		n.s.
O15020-2;O15020;A4QPE4	O15020-2;O15020;A4QPE4	SPTBN2	25.3943	0.0335171	0.702596	0.0726361	AvC_up	n.s.	n.s.	1.21952	-0.265237	1.48475		n.s.
O15061;O15061-3	O15061	SYNM	33.8816	5.08962e-10	0.902812	5.68569e-07	AvC_up	n.s.	MvC_up	0.48826	0.0111237	0.477136	shared	n.s.
O15067;H0YGH1;J3KT98;J3QSG0;J3QSH6;J3KTL4;J3KTQ5;J3QL39	O15067	PFAS	26.9738	0.795627	0.159341	0.24638	n.s.	n.s.	n.s.	-0.181102	0.892305	-1.07341		n.s.
O15075-2;O15075;Q5VZY9;O15075-3;O15075-4	O15075-2;O15075;Q5VZY9	DCLK1	24.4352	0.572072	0.149492	0.148333	n.s.	n.s.	n.s.	0.266689	-0.657652	0.924342		n.s.
O15116;E5RJ47;E5RH18	O15116	LSM1	25.2479	0.669807	0.818864	0.935139	n.s.	n.s.	n.s.	-0.253495	-0.14865	-0.104845		n.s.
O15126;A0A087WXB0;O15126-2;A0A087WZA6;A0A087WU14;A0A087WTX8	O15126;A0A087WXB0;O15126-2	SCAMP1	25.9202	0.503158	0.00185796	0.0717484	n.s.	AvM_do	n.s.	-0.291115	-1.32625	1.03514		changed in MR
O15127	O15127	SCAMP2	25.5992	0.939066	0.595476	0.806839	n.s.	n.s.	n.s.	0.0456946	0.291865	-0.246171		n.s.
O15144;H7C3F9;C9JTV5;G5E9J0;G5E9S7	O15144	ARPC2	30.4895	0.302902	0.16671	0.0753482	n.s.	n.s.	n.s.	0.134768	-0.186413	0.321181		n.s.
O15145;C9JZD1;F8VR50	O15145	ARPC3	29.2727	0.919175	0.918075	0.908291	n.s.	n.s.	n.s.	-0.0200014	0.0196033	-0.0396048		n.s.
O15173;U3KQM0	O15173	PGRMC2	29.7551	0.00786044	0.0622621	0.750087	AvC_do	n.s.	n.s.	-0.310641	-0.232863	-0.0777777		n.s.
O15212;A2AB88	O15212;A2AB88	PFDN6	29.2447	0.00148927	0.0491561	0.56143	AvC_do	AvM_do	n.s.	-0.419219	-0.277631	-0.141587	AS specific	changed in MR
O15230;O15230-2;A0A087WYH7	O15230	LAMA5	32.9095	0.950737	0.150777	0.383254	n.s.	n.s.	n.s.	-0.0128407	-0.252074	0.239234		n.s.
O15239	O15239	NDUFA1	29.1996	0.00592549	0.804499	0.098908	AvC_do	n.s.	n.s.	-1.23641	-0.140633	-1.09577		n.s.
O15247;A6PVS0	O15247;A6PVS0	CLIC2	27.2704	0.0501898	0.0260092	0.862804	n.s.	AvM_do	n.s.	-0.476173	-0.571617	0.0954438		changed in MR
O15254;O15254-2;D6RJ89	O15254;O15254-2	ACOX3	25.7641	0.0159278	0.330235	0.443307	AvC_do	n.s.	n.s.	-1.1603	-0.520621	-0.639675		n.s.
O15258;Q5T092;A0A0A0MR06;Q5T091;Q5T093	O15258;Q5T092;A0A0A0MR06;Q5T091;Q5T093	RER1	27.2698	0.196786	0.588415	0.738931	n.s.	n.s.	n.s.	-0.535281	-0.259386	-0.275895		n.s.
O15260;Q5T8U5;O15260-2;B7Z1G8;O15260-3	O15260;Q5T8U5;O15260-2;B7Z1G8;O15260-3	SURF4	29.483	0.00551824	0.207046	0.41717	AvC_do	n.s.	n.s.	-0.742465	-0.368954	-0.373511		n.s.
O15270;H0YJV2;Q9NUV7	O15270	SPTLC2	27.5514	8.41693e-05	0.776677	0.00692632	AvC_up	n.s.	MvC_up	2.20343	0.196971	2.00646	shared	n.s.
O15273;J3KT40	O15273;J3KT40	TCAP	31.6271	0.364208	0.150004	0.0838519	n.s.	n.s.	n.s.	-0.16037	0.257658	-0.418028		n.s.
O15294;O15294-2;O15294-4;C9JZL3	O15294;O15294-2;O15294-4	OGT	27.4883	0.00804041	0.128837	0.584941	AvC_do	n.s.	n.s.	-1.02385	-0.631801	-0.39205		n.s.
O15305;H3BV55;H3BRM0;H3BPH4;O15305-2;H3BR08;H3BM92;H3BV34;H3BT06;H3BNY9	O15305;H3BV55;H3BRM0;H3BPH4	PMM2	25.5226	0.74017	0.110424	0.1649	n.s.	n.s.	n.s.	0.215086	-0.949693	1.16478		n.s.
O15327	O15327	INPP4B	29.47	0.0155608	0.361878	0.412427	AvC_up	n.s.	n.s.	0.547298	0.230865	0.316433		n.s.
O15355	O15355	PPM1G	26.787	0.923016	0.353918	0.520084	n.s.	n.s.	n.s.	-0.114934	0.966708	-1.08164		n.s.
O15357;A0A0A0MTP6;O15357-2;F5GY16;H7BXR2;H0YFZ4;F5H588	O15357;A0A0A0MTP6;O15357-2	INPPL1	25.5984	0.944634	0.636903	0.831103	n.s.	n.s.	n.s.	-0.0380446	-0.241521	0.203476		n.s.
O15371-2;O15371-3;O15371;B0QYA5;B0QYA6;B0QYA8;B0QYA4	O15371-2;O15371-3;O15371	EIF3D	28.991	0.144476	0.0357014	0.708106	n.s.	AvM_do	n.s.	-0.300873	-0.451867	0.150994		changed in MR
O15382;M0QXF9;B3KSI3;O15382-2;M0R2K7	O15382;M0QXF9;B3KSI3;O15382-2	BCAT2	32.4538	1.03341e-08	2.62448e-05	0.373125	AvC_do	AvM_do	n.s.	-0.7154	-0.543747	-0.171653	AS specific	changed in MR
O15400-2;O15400	O15400-2;O15400	STX7	29.7961	0.583699	0.245944	0.230139	n.s.	n.s.	n.s.	0.103409	-0.214606	0.318014		n.s.
O15439-2;O15439;A0A2R8Y6V8;A0A2R8YDC1;Q8IWU1	O15439-2;O15439;A0A2R8Y6V8	ABCC4	25.2981	0.221393	0.185994	0.945856	n.s.	n.s.	n.s.	1.01465	1.15349	-0.138839		n.s.
O15498;O15498-2;H7C3K7	O15498;O15498-2	YKT6	27.4274	0.739511	0.817109	0.969537	n.s.	n.s.	n.s.	0.13477	0.100685	0.0340854		n.s.
O15511;B1ALC0;O15511-2	O15511;B1ALC0;O15511-2	ARPC5	28.1233	0.112056	0.0854656	0.92466	n.s.	n.s.	n.s.	-0.370143	-0.421158	0.0510147		n.s.
O15523;O15523-2;O15523-3;C9J081;C9J8G5	O15523;O15523-2	DDX3Y	24.8308	0.613071	0.14741	0.594706	n.s.	n.s.	n.s.	-0.335348	-0.92029	0.584942		n.s.
O43143	O43143	DHX15	28.1823	0.00565357	0.164739	0.480253	AvC_do	n.s.	n.s.	-0.491837	-0.267738	-0.224099		n.s.
O43150;O43150-2;A0A286YFG8	O43150;O43150-2	ASAP2	25.2448	0.0874827	0.046304	0.862804	n.s.	AvM_up	n.s.	1.09659	1.34647	-0.249876		changed in AS
O43169;H3BUX2;D6RFH4;J3QR91	O43169;H3BUX2;D6RFH4	CYB5B	22.8609	0.935892	0.119191	0.34249	n.s.	n.s.	n.s.	0.0550559	0.879626	-0.82457		n.s.
O43181;H0Y9M8	O43181	NDUFS4	32.9427	1.75269e-07	0.000291064	0.340994	AvC_do	AvM_do	n.s.	-0.773811	-0.55375	-0.220061	AS specific	changed in MR
O43182;O43182-4;O43182-2;H7BYE6;O43182-5;O43182-3	O43182;O43182-4;O43182-2;H7BYE6;O43182-5;O43182-3	ARHGAP6	24.7919	0.0910778	0.611465	0.545132	n.s.	n.s.	n.s.	0.891242	0.316518	0.574724		n.s.
O43237;O43237-2;B4E2E0;J3KRI4;H3BUM4;J3KRZ2;J3KSD2	O43237;O43237-2	DYNC1LI2	29.0243	0.28481	0.0923698	0.0382502	n.s.	n.s.	MvC_up	0.128026	-0.205468	0.333495		n.s.
O43242;O43242-2;H0YGV8;F5H8K4	O43242;O43242-2	PSMD3	30.6912	0.115979	0.00186537	0.278702	n.s.	AvM_do	n.s.	-0.130335	-0.270924	0.140589		changed in MR
O43264;O43264-2;F5H3C1	O43264;O43264-2	ZW10	25.348	0.00642718	0.714083	0.0218316	AvC_do	n.s.	MvC_do	-1.04351	0.170868	-1.21438	shared	n.s.
O43293;O43293-2;M0R0D0;M0QYW5;M0QYY8	O43293;O43293-2	DAPK3	26.5324	0.818399	0.817109	0.793799	n.s.	n.s.	n.s.	-0.173564	0.184568	-0.358132		n.s.
O43294;O43294-2;H3BSN4;H3BQC4;H3BS04;H3BN49;I3L209	O43294;O43294-2	TGFB1I1	28.1805	0.789857	0.198901	0.282567	n.s.	n.s.	n.s.	0.14338	-0.63192	0.7753		n.s.
O43301;A0A1B0GTF3;K7ENF6;K7ELE6	O43301;A0A1B0GTF3	HSPA12A	28.679	0.0257256	0.000467366	0.349137	AvC_do	AvM_do	n.s.	-0.811749	-1.37758	0.56583	AS specific	changed in MR
O43324;D6RBD7;C9J1V9;O43324-2;H0YAL7;D6RCQ0;H0YAH9	O43324;D6RBD7;C9J1V9;O43324-2;H0YAL7	EEF1E1	27.6947	0.389738	0.795566	0.483944	n.s.	n.s.	n.s.	-0.292032	0.103613	-0.395645		n.s.
O43325;H3BNK2	O43325;H3BNK2	LYRM1	26.4757	0.0118171	0.782096	0.150007	AvC_do	n.s.	n.s.	-0.893785	-0.123413	-0.770372		n.s.
O43390;O43390-3;B4DT28;A0A286YEZ8	O43390;O43390-3;B4DT28	HNRNPR	29.9648	0.00732677	0.0041623	0.877658	AvC_do	AvM_do	n.s.	-0.410726	-0.46669	0.0559645	AS specific	changed in MR
O43396;K7ER96;K7EML9;K7EPB7;K7EME7;K7EKG2	O43396;K7ER96	TXNL1	30.1965	0.0115872	0.394841	0.0101545	AvC_up	n.s.	MvC_up	0.257781	-0.0982318	0.356013	shared	n.s.
O43399-4;O43399-3;O43399-2;O43399-6	O43399-4;O43399-3;O43399-2;O43399-6	TPD52L2	24.5347	0.125844	0.32956	0.833315	n.s.	n.s.	n.s.	-0.590073	-0.410897	-0.179176		n.s.
O43399-5;O43399-7;O43399;A0A087WYR3;A0A087WZ51	O43399-5;O43399-7;O43399;A0A087WYR3;A0A087WZ51	TPD52L2	30.5982	0.011703	0.0090441	7.27277e-05	AvC_up	AvM_do	MvC_up	0.23373	-0.256174	0.489905	shared	changed in MR
O43402;M0R1B0;O43402-2	O43402;M0R1B0	EMC8	25.5341	0.200911	0.439459	0.144056	n.s.	n.s.	n.s.	-0.505882	0.33938	-0.845262		n.s.
O43447;C9JQD4;O43447-2;H0YEL5;A6NM32	O43447;C9JQD4;O43447-2;H0YEL5	PPIH	25.5501	0.122715	0.410278	0.0851783	n.s.	n.s.	n.s.	0.585322	-0.347194	0.932516		n.s.
O43464;A0A0C4DG44;O43464-3;O43464-2;O43464-4	O43464;A0A0C4DG44;O43464-3;O43464-2;O43464-4	HTRA2	29.2746	0.0819183	0.213073	0.860856	n.s.	n.s.	n.s.	-0.55055	-0.424094	-0.126456		n.s.
O43488;H3BLU7;H7C5H7;Q8NHP1-3	O43488;H3BLU7	AKR7A2	30.9154	0.112266	0.36263	0.78204	n.s.	n.s.	n.s.	-0.340425	-0.214833	-0.125591		n.s.
O43491	O43491	EPB41L2	29.9314	0.523822	0.000807204	0.0012278	n.s.	AvM_do	MvC_up	0.122444	-0.629602	0.752046	MR sepcific	changed in MR
O43493-2;O43493-5;O43493-3;O43493;O43493-4;O43493-6	O43493-2;O43493-5;O43493-3;O43493;O43493-4	TGOLN2	23.7557	0.0264856	0.450761	0.432788	AvC_up	n.s.	n.s.	0.702192	0.274318	0.427874		n.s.
O43504;R4GMU8;E9PLX3;A0A0C4DGV4	O43504;R4GMU8;E9PLX3;A0A0C4DGV4	LAMTOR5	27.8674	0.535222	0.974537	0.724894	n.s.	n.s.	n.s.	0.193219	-0.0109284	0.204148		n.s.
O43583;F8VVL1	O43583;F8VVL1	DENR	27.8338	0.00861477	0.0885113	0.682686	AvC_up	n.s.	n.s.	0.435952	0.302869	0.133083		n.s.
O43615;M0QXU7;M0QXM9;M0R301	O43615;M0QXU7	TIMM44	30.8162	8.32498e-06	0.00279416	0.414018	AvC_do	AvM_do	n.s.	-0.444868	-0.309401	-0.135466	AS specific	changed in MR
O43617;A0A087WWM0;O43617-2;A0A087WYS5;A6NKE1	O43617;A0A087WWM0;O43617-2;A0A087WYS5	TRAPPC3	27.1024	0.793423	0.413575	0.773294	n.s.	n.s.	n.s.	-0.055316	-0.164464	0.109148		n.s.
O43633;M0R1T5;M0R1L7;M0QXX8	O43633;M0R1T5;M0R1L7	CHMP2A	26.5953	0.542526	0.654479	0.963994	n.s.	n.s.	n.s.	0.251594	0.204461	0.0471332		n.s.
O43676;C9JKQ2	O43676;C9JKQ2	NDUFB3	31.8468	0.0123946	0.153602	0.605785	AvC_do	n.s.	n.s.	-0.419151	-0.25763	-0.161521		n.s.
O43677	O43677	NDUFC1	27.1695	0.465682	0.904814	0.763037	n.s.	n.s.	n.s.	-0.330692	-0.0645144	-0.266178		n.s.
O43678;O43678-2;A6NJG2	O43678;O43678-2	NDUFA2	32.2065	0.00230117	0.111096	0.443115	AvC_do	n.s.	n.s.	-0.480511	-0.27037	-0.210141		n.s.
O43681;A0A087WXS7;K7ERW9	O43681;A0A087WXS7	ASNA1	29.8474	0.868895	0.176215	0.298202	n.s.	n.s.	n.s.	0.0256417	-0.183051	0.208693		n.s.
O43684-2;O43684;J3QT28;J3QSX4	O43684-2;O43684;J3QT28	BUB3	25.4331	0.477922	0.0610266	0.493005	n.s.	n.s.	n.s.	-0.288564	-0.745403	0.456839		n.s.
O43707;O43707-2;F5GXS2;O43707-3;K7EP19;D6RH00	O43707;O43707-2;F5GXS2;O43707-3	ACTN4	34.0947	0.167212	0.165129	0.0386556	n.s.	n.s.	MvC_up	0.28591	-0.302349	0.588259		n.s.
O43719;Q5H919;Q5H918	O43719	HTATSF1	25.0389	0.462779	0.0653263	0.517168	n.s.	n.s.	n.s.	-0.367844	-0.905883	0.538039		n.s.
O43741;O43741-2	O43741;O43741-2	PRKAB2	29.2505	0.924299	0.145331	0.291633	n.s.	n.s.	n.s.	0.0219905	-0.283895	0.305886		n.s.
O43747;O43747-2;H3BNR4;H3BR36;H3BUN9;B4DGE1;H3BRM7;H3BN71;H3BN75;H3BS13;H3BV30;B3KNW1	O43747;O43747-2	AP1G1	26.3877	0.000286139	0.0215665	0.501096	AvC_do	AvM_do	n.s.	-1.30322	-0.872993	-0.430226	AS specific	changed in MR
O43760;O43760-2;K7ELS8;K7ELD9;K7ENG9;K7EJ35	O43760;O43760-2;K7ELS8;K7ELD9;K7ENG9	SYNGR2	26.2854	0.666068	0.646388	0.978487	n.s.	n.s.	n.s.	-0.176726	-0.198233	0.0215073		n.s.
O43765;K7EMD6;K7ERW5	O43765;K7EMD6	SGTA	27.8676	0.21852	0.722469	0.285535	n.s.	n.s.	n.s.	-0.388286	0.13264	-0.520926		n.s.
O43766;D6RCP8;A0A1X7SBR7;A0A1W2PPM2;O43766-3;O43766-2;A0A1W2PQE9;A0A1W2PRE7;A0A1W2PNQ5;Q6P5Q6;A0A1W2PQS9;A0A1W2PR40;B4E0L7;A0A1W2PQ87	O43766;D6RCP8;A0A1X7SBR7;A0A1W2PPM2;O43766-3;O43766-2;A0A1W2PQE9;A0A1W2PRE7	LIAS	25.2126	0.000951014	0.010403	0.786792	AvC_do	AvM_do	n.s.	-1.25473	-1.03202	-0.222706	AS specific	changed in MR
O43772	O43772	SLC25A20	31.9898	0.614062	0.51172	0.935755	n.s.	n.s.	n.s.	-0.0798773	-0.108159	0.0282819		n.s.
O43776;K7EIU7;K7EPK2;O43776-2;K7EMQ6;K7EQ35;K7EJ19	O43776	NARS	29.8845	0.523257	0.297053	0.841314	n.s.	n.s.	n.s.	-0.19007	-0.312149	0.122078		n.s.
O43809;H3BND3;H3BV41	O43809;H3BND3	NUDT21	27.7663	0.69821	0.193303	0.605762	n.s.	n.s.	n.s.	-0.137216	-0.43443	0.297214		n.s.
O43813;E9PHS0;F8WDS9;H7C2E3	O43813;E9PHS0	LANCL1	30.5303	0.809937	0.263377	0.366097	n.s.	n.s.	n.s.	0.0325286	-0.139221	0.17175		n.s.
O43815	O43815	STRN	28.6418	0.640776	0.212701	0.227638	n.s.	n.s.	n.s.	-0.117102	0.300891	-0.417993		n.s.
O43819	O43819	SCO2	26.0842	0.0126215	0.0359061	0.910097	AvC_up	AvM_up	n.s.	1.00545	0.902351	0.103103	AS specific	changed in AS
O43823;M0QYL4	O43823	AKAP8	23.9335	0.435783	0.00308674	0.124697	n.s.	AvM_do	n.s.	-0.257891	-0.961179	0.703288		changed in MR
O43852;O43852-3;O43852-6;O43852-5;O43852-15;O43852-10;O43852-9;H0Y875;O43852-13;O43852-14;O43852-11;O43852-12	O43852;O43852-3;O43852-6;O43852-5;O43852-15;O43852-10;O43852-9;H0Y875	CALU	31.711	0.0837716	0.931661	0.311573	n.s.	n.s.	n.s.	-0.225613	-0.0140084	-0.211605		n.s.
O43865;O43865-2	O43865;O43865-2	AHCYL1	25.9488	0.820799	0.405363	0.496912	n.s.	n.s.	n.s.	-0.0920129	0.32142	-0.413433		n.s.
O43920	O43920	NDUFS5	32.2975	0.00497757	0.55582	0.165412	AvC_do	n.s.	n.s.	-0.40371	-0.100408	-0.303302		n.s.
O60220;A0A2R8YDA8	O60220	TIMM8A	28.9414	0.707087	0.785825	0.695953	n.s.	n.s.	n.s.	-0.109844	0.0859084	-0.195753		n.s.
O60237-6;O60237;O60237-5;O60237-2;H7C4R6;Q6GQY8	O60237-6;O60237	PPP1R12B	31.7943	0.000270322	0.998608	0.00639181	AvC_up	n.s.	MvC_up	0.359553	0.000195665	0.359357	shared	n.s.
O60238-2;H0YBC7;O60238	O60238-2;H0YBC7;O60238	BNIP3L	25.7877	0.449606	0.774808	0.837021	n.s.	n.s.	n.s.	0.639687	0.280736	0.358951		n.s.
O60240;H0YM16	O60240	PLIN1	25.6204	0.820558	0.34437	0.444839	n.s.	n.s.	n.s.	0.266017	-1.0362	1.30222		n.s.
O60256;O60256-3;O60256-2;O60256-4;E7EPA1;C9K0K7;I3L0S1;C9JDU5;C9JJS3;C9JDH0;E7EW35;I3L331;I3L164;I3L4G9;I3L1T1;I3L3B8;I3L2J4	O60256;O60256-3;O60256-2;O60256-4;E7EPA1;C9K0K7;I3L0S1	PRPSAP2	28.9631	0.0531814	0.205849	0.792229	n.s.	n.s.	n.s.	0.358129	0.253085	0.105044		n.s.
O60262;K7ESC6	O60262;K7ESC6	GNG7	29.0319	0.187431	0.732576	0.262314	n.s.	n.s.	n.s.	-0.31803	0.0985265	-0.416557		n.s.
O60264	O60264	SMARCA5	23.9243	0.792722	0.656607	0.659046	n.s.	n.s.	n.s.	-0.0948222	0.163262	-0.258084		n.s.
O60271;O60271-3;D6RHI8;H0YBE9;H0YBS5;H0Y981	O60271;O60271-3	SPAG9	26.5151	0.0786074	0.929395	0.226096	n.s.	n.s.	n.s.	0.642354	-0.0404547	0.682808		n.s.
O60313-2;O60313-10;O60313;O60313-11;C9JMB8;E5KLJ9;O60313-9;A0A2R8Y3X5;A0A2R8YE78;O60313-13;A0A2R8YGE5;A0A2R8YD53;A0A2R8Y4Q3;A0A2R8Y4G4;A0A2R8YE54	O60313-2;O60313-10;O60313;O60313-11;C9JMB8;E5KLJ9;O60313-9;A0A2R8Y3X5;A0A2R8YE78;O60313-13;A0A2R8YGE5	OPA1	33.6562	0.659077	0.845047	0.708106	n.s.	n.s.	n.s.	-0.0405156	0.0196582	-0.0601738		n.s.
O60343-3	O60343-3	TBC1D4	27.2475	0.122715	0.0553675	0.833789	n.s.	n.s.	n.s.	-0.553227	-0.719396	0.166168		n.s.
O60449-3;O60449-2;O60449;Q8IX05;A0A087WT00;Q8IX05-2	O60449-3;O60449-2;O60449	LY75	25.8733	0.820708	0.226042	0.571064	n.s.	n.s.	n.s.	0.202656	0.988508	-0.785851		n.s.
O60488-2;O60488;D6RF95;H0Y9A0;D6RD96;D6RFW9;D6RDA8	O60488-2;O60488	ACSL4	26.9851	0.117733	0.166067	0.969537	n.s.	n.s.	n.s.	-0.517338	-0.4859	-0.0314387		n.s.
O60493;O60493-2;O60493-4;O60493-3	O60493;O60493-2;O60493-4;O60493-3	SNX3	29.3841	0.0480325	0.00412167	0.570236	AvC_up	AvM_up	n.s.	0.395009	0.60442	-0.209411	AS specific	changed in AS
O60502;O60502-4;O60502-2;O60502-3;H7C3X0	O60502;O60502-4;O60502-2;O60502-3	OGA	26.1812	0.0448052	0.00422345	0.584941	AvC_do	AvM_do	n.s.	-0.872586	-1.31	0.437411	AS specific	changed in MR
O60504;E7EQH0;H0YB51;H0YAZ3;H0YAU6	O60504	SORBS3	28.4041	0.0470807	0.490473	0.505742	AvC_up	n.s.	n.s.	0.751785	0.302664	0.449121		n.s.
O60506;O60506-2;F6UXX1	O60506;O60506-2	SYNCRIP	30.0442	0.0839204	0.103586	0.998566	n.s.	n.s.	n.s.	-0.233714	-0.233125	-0.000588852		n.s.
O60518;A0A096LPA6;A0A096LNS2	O60518	RANBP6	25.4882	0.0453878	0.0555631	0.988264	AvC_do	n.s.	n.s.	-0.986286	-1.00174	0.0154548		n.s.
O60645-3;O60645;O60645-2;D6RB59;H0Y995;D6RBR9	O60645-3;O60645;O60645-2;D6RB59	EXOC3	25.8842	0.144956	0.0428024	0.744678	n.s.	AvM_do	n.s.	-0.500535	-0.727336	0.226801		changed in MR
O60662;O60662-2	O60662;O60662-2	KLHL41	30.7666	0.00315335	0.929495	0.0453138	AvC_do	n.s.	MvC_do	-0.546679	-0.0207308	-0.525949	shared	n.s.
O60664-4;O60664;O60664-3;K7EL96;K7ER39;K7EJD0	O60664-4;O60664;O60664-3	PLIN3	29.9312	0.089433	0.00370474	0.430573	n.s.	AvM_do	n.s.	-0.264177	-0.472696	0.208519		changed in MR
O60669;F8W0N3;F8VS95;F8W0U4;F8VXG4;F8VYZ2;F8VVU7;F8VQS4;F8W1M4	O60669;F8W0N3	SLC16A7	27.1334	0.865677	0.807868	0.812049	n.s.	n.s.	n.s.	0.0770655	-0.112398	0.189464		n.s.
O60684;Q5TFJ7;S4R3E5	O60684;Q5TFJ7	KPNA6	26.3956	0.336035	0.0267281	0.438835	n.s.	AvM_do	n.s.	-0.3261	-0.756944	0.430844		changed in MR
O60701;O60701-3;O60701-2;E7ETF4;E7EV97;E7ER83;E7ER95;D6RHF4;E9PBD2	O60701;O60701-3;O60701-2	UGDH	26.6168	0.628165	0.293499	0.286194	n.s.	n.s.	n.s.	0.224349	-0.476875	0.701224		n.s.
O60716-5;O60716-3;C9JZR2;O60716-8;O60716-7;O60716-2;O60716;O60716-13;O60716-11;O60716-6;O60716-4;O60716-21;O60716-19;O60716-16;O60716-15;O60716-10;O60716-9;O60716-24;O60716-23;O60716-18;O60716-17;O60716-14;O60716-12;O60716-22;O60716-20;O60716-29;O60716-27;O60716-32;O60716-31;O60716-26;O60716-25;O60716-30;O60716-28;E9PKY0;H0YC95;E9PKL1	O60716-5;O60716-3;C9JZR2;O60716-8;O60716-7;O60716-2;O60716;O60716-13;O60716-11;O60716-6;O60716-4;O60716-21;O60716-19;O60716-16;O60716-15;O60716-10;O60716-9;O60716-24;O60716-23;O60716-18;O60716-17;O60716-14;O60716-12;O60716-22;O60716-20;O60716-29;O60716-27;O60716-32;O60716-31;O60716-26;O60716-25;O60716-30;O60716-28	CTNND1	28.9169	0.0216873	0.00366334	0.686223	AvC_do	AvM_do	n.s.	-0.51227	-0.689282	0.177012	AS specific	changed in MR
O60725	O60725	ICMT	24.7273	0.74294	0.662393	0.630035	n.s.	n.s.	n.s.	0.154646	-0.214331	0.368977		n.s.
O60733-2;O60733;O60733-4;O60733-3;B0QYE9;F8WEQ9;F2Z3G2;F8WEN3;M0R3D9;M0R1Q9;H0Y6W2;H7C3P5;H0Y7G5;H0Y6T3	O60733-2;O60733;O60733-4;O60733-3;B0QYE9	PLA2G6	28.302	0.648077	0.773878	0.647053	n.s.	n.s.	n.s.	0.32635	-0.228235	0.554585		n.s.
O60739;K7EQP2	O60739	EIF1B	26.5454	0.555672	0.515566	0.96717	n.s.	n.s.	n.s.	-0.18413	-0.215199	0.031069		n.s.
O60749;O60749-2;D6RC15	O60749;O60749-2	SNX2	28.8908	0.170877	0.0288803	0.00544927	n.s.	AvM_do	MvC_up	0.1876	-0.310233	0.497833	MR sepcific	changed in MR
O60763-2	O60763-2	USO1	30.4429	0.278653	0.0867436	0.735486	n.s.	n.s.	n.s.	-0.0949946	-0.153212	0.058217		n.s.
O60783	O60783	MRPS14	27.381	0.0786959	0.12789	0.957191	n.s.	n.s.	n.s.	-0.631339	-0.580354	-0.0509851		n.s.
O60784;O60784-2;O60784-4;O60784-3;B0QY01;V9GYF4;B0QY02;Q6UW50;H7BYN7;F8WB30;F8WAW7;F8WE29;F8WBB0	O60784;O60784-2;O60784-4;O60784-3;B0QY01	TOM1	29.8094	0.0172565	0.0532519	0.891813	AvC_do	n.s.	n.s.	-0.387637	-0.335456	-0.0521815		n.s.
P62807;P57053;O60814;U3KQK0;Q99879;Q99877;Q93079;Q5QNW6;P58876;Q5QNW6-2	P62807;P57053;O60814;U3KQK0;Q99879;Q99877;Q93079;Q5QNW6;P58876;Q5QNW6-2	HIST1H2BC	34.6363	0.0625856	0.214214	0.808911	n.s.	n.s.	n.s.	-0.32343	-0.232857	-0.090573		n.s.
O60825;F6RAZ1;I1Z9G3;P16118-2;P16118;F6XNB3;H0Y483;Q4VBA9;Q16877-3;A0A087X278;A0A087X2H4;A0A1W2PNV9	O60825	PFKFB2	30.1893	0.219164	0.186872	0.950559	n.s.	n.s.	n.s.	0.177652	0.200309	-0.0226568		n.s.
O60825-2	O60825-2	PFKFB2	24.6466	0.909145	0.911657	0.900138	n.s.	n.s.	n.s.	0.0457521	-0.0432335	0.0889856		n.s.
O60830;O60830-2;V9GYS0;V9GYU0;V9GYK7	O60830;O60830-2;V9GYS0	TIMM17B	25.5987	0.265492	0.112889	0.0424675	n.s.	n.s.	MvC_do	-0.436937	0.641214	-1.07815		n.s.
O60831;A6NP52	O60831;A6NP52	PRAF2	26.1519	0.127563	0.297143	0.861623	n.s.	n.s.	n.s.	-0.581521	-0.431112	-0.150409		n.s.
O60869-2;O60869-3;O60869	O60869-2;O60869-3;O60869	EDF1	26.7988	0.560451	0.311275	0.265595	n.s.	n.s.	n.s.	-0.214017	0.372183	-0.586199		n.s.
O60884;A0A087WT48;I3L320	O60884	DNAJA2	31.0553	0.0453842	0.724402	0.338552	AvC_up	n.s.	n.s.	0.160037	0.0343531	0.125684		n.s.
O60888-3;O60888;O60888-2;C9IZG4	O60888-3;O60888;O60888-2;C9IZG4	CUTA	29.6292	0.00123179	0.0216381	0.690807	AvC_do	AvM_do	n.s.	-1.13571	-0.859654	-0.27606	AS specific	changed in MR
O60925;E5RGS4;D6RGG5	O60925;E5RGS4	PFDN1	27.7013	0.485633	0.560602	0.978487	n.s.	n.s.	n.s.	0.294282	0.266952	0.0273306		n.s.
O75027;O75027-2;B4DGL8;A0A087WW65;O75027-3;A0A2R8Y473;E9PJR8;A0A2R8Y3N2;E9PNQ5;A0A2R8YF35	O75027;O75027-2;B4DGL8;A0A087WW65;O75027-3;A0A2R8Y473	ABCB7	30.1268	0.0567524	0.214505	0.793799	n.s.	n.s.	n.s.	-0.270465	-0.190464	-0.0800012		n.s.
O75083;O75083-3;D6RD66	O75083;O75083-3;D6RD66	WDR1	32.6315	0.0430577	0.0252407	0.882942	AvC_up	AvM_up	n.s.	0.192994	0.225778	-0.0327833	AS specific	changed in AS
O75112;A0A096LPD7	O75112	LDB3	32.1505	0.74017	0.509095	0.867953	n.s.	n.s.	n.s.	0.395916	0.78569	-0.389773		n.s.
O75112-2	O75112-2	LDB3	31.061	0.382056	0.725066	0.427042	n.s.	n.s.	n.s.	0.225774	-0.103742	0.329516		n.s.
O75112-3	O75112-3	LDB3	24.7329	0.0802489	0.78148	0.402744	n.s.	n.s.	n.s.	0.814871	0.160276	0.654595		n.s.
O75112-4;A0A0C4DGG7	O75112-4;A0A0C4DGG7	LDB3	30.3638	0.0959127	0.217457	0.882942	n.s.	n.s.	n.s.	-0.633415	-0.503646	-0.129769		n.s.
O75112-7	O75112-7	LDB3	36.7038	0.519847	0.175697	0.148907	n.s.	n.s.	n.s.	0.0707343	-0.14687	0.217605		n.s.
O75116;D6REE7;C9JFJ0	O75116	ROCK2	29.1761	0.821238	0.653215	0.904786	n.s.	n.s.	n.s.	-0.136904	-0.277692	0.140789		n.s.
O75128-3;O75128;O75128-7;O75128-2;A0A0J9YWK3;O75128-5;O75128-4;A0A3B3IU00;H7C1N2;J3KR05;C9J9X1	O75128-3;O75128;O75128-7;O75128-2;A0A0J9YWK3;O75128-5;O75128-4;A0A3B3IU00;H7C1N2;J3KR05	COBL	28.279	0.184217	0.520318	0.776155	n.s.	n.s.	n.s.	-0.403054	-0.22292	-0.180133		n.s.
O75131;A0A087WYQ3;H0YB26;E5RHZ0;A0A087WXR6;A0A087WUS8;E5RFT7;A0A0G2JMP5;Q96A23;Q9UBL6-2;Q96A23-2;Q9UBL6	O75131;A0A087WYQ3	CPNE3	31.0871	0.00143666	0.261362	0.207001	AvC_do	n.s.	n.s.	-0.29043	-0.112353	-0.178077		n.s.
O75147;A6NN50;O75147-4;O75147-1;O75147-2;A8MSZ8;H0Y684;S4R463	O75147;A6NN50;O75147-4;O75147-1;O75147-2	OBSL1	28.6813	0.448233	0.577257	0.951729	n.s.	n.s.	n.s.	0.170036	0.136919	0.0331174		n.s.
O75153	O75153	CLUH	29.1478	0.0568152	0.0673255	0.988172	n.s.	n.s.	n.s.	-0.323616	-0.329248	0.00563215		n.s.
O75155;O75155-2;A0A3B3ISC4;F8WBB8;C9JH00	O75155;O75155-2	CAND2	30.7476	0.0245507	0.0573172	0.925605	AvC_do	n.s.	n.s.	-0.411127	-0.371011	-0.0401163		n.s.
O75165;A0A3B3IRM0;H0Y8Q2;H0YA63	O75165	DNAJC13	27.359	0.316825	0.191382	0.876438	n.s.	n.s.	n.s.	-0.466241	-0.628738	0.162497		n.s.
O75190;E9PH18;O75190-4	O75190;E9PH18;O75190-4	DNAJB6	25.8152	0.349838	0.00437442	0.187571	n.s.	AvM_do	n.s.	-0.511752	-1.55767	1.04592		changed in MR
O75208;H3BNT2;H3BSJ5;H3BRC0;H3BPC6;H3BPY0;H3BPW3;H3BVA5;O75208-2	O75208;H3BNT2;H3BSJ5;H3BRC0	COQ9	32.9168	0.265492	0.893872	0.596851	n.s.	n.s.	n.s.	-0.18422	-0.0275186	-0.156701		n.s.
O75223	O75223	GGCT	26.2117	0.140317	0.806032	0.504277	n.s.	n.s.	n.s.	0.544398	0.112053	0.432346		n.s.
O75251;F5H5N1;F5GXJ1;O75251-2;A0A087WXF6;A0A087WTI3	O75251;F5H5N1;F5GXJ1;O75251-2	NDUFS7	31.8706	0.0173696	0.0016526	0.596851	AvC_do	AvM_do	n.s.	-0.361637	-0.511667	0.15003	AS specific	changed in MR
O75306;O75306-2	O75306;O75306-2	NDUFS2	34.5384	5.40375e-05	0.00849637	0.451988	AvC_do	AvM_do	n.s.	-0.603834	-0.410332	-0.193502	AS specific	changed in MR
O75323;O75323-2;C9K068;F8WBI5	O75323;O75323-2	NIPSNAP2	33.3564	6.6632e-05	0.797752	0.00557658	AvC_do	n.s.	MvC_do	-0.529305	-0.0423337	-0.486971	shared	n.s.
O75339	O75339	CILP	30.2351	2.29828e-05	0.0183819	0.253502	AvC_up	AvM_up	n.s.	1.69262	0.984521	0.708096	AS specific	changed in AS
O75340;O75340-2;A0A024QZ42;E7EPW6;H0Y9X3;A0A087WZ38;O75340-3;D6RA21;Q86W51	O75340;O75340-2;A0A024QZ42	PDCD6	28.53	0.994107	0.689804	0.83204	n.s.	n.s.	n.s.	-0.00275873	-0.123688	0.120929		n.s.
O75348	O75348	ATP6V1G1	26.4599	0.291987	0.517321	0.235001	n.s.	n.s.	n.s.	0.549572	-0.377946	0.927518		n.s.
O75351;K7EL71;K7EKZ3	O75351	VPS4B	28.2092	0.220957	0.807868	0.606907	n.s.	n.s.	n.s.	-0.610158	-0.1479	-0.462258		n.s.
O75367-3;O75367;O75367-2;B4DJC3;D6RCF2	O75367-3;O75367;O75367-2;B4DJC3	H2AFY	31.9954	0.000675198	9.4379e-05	0.632447	AvC_do	AvM_do	n.s.	-0.45924	-0.582431	0.123191	AS specific	changed in MR
O75368	O75368	SH3BGRL	29.2693	0.0545155	0.764522	0.123405	n.s.	n.s.	n.s.	0.533089	-0.103087	0.636176		n.s.
O75369-2;O75369-9;O75369;O75369-6;O75369-3;E7EN95;O75369-7;O75369-5;O75369-4;H7C5L4;A0A0A0MT44;A0A0C4DGA1	O75369-2;O75369-9;O75369;O75369-6;O75369-3;E7EN95;O75369-7;O75369-5;O75369-4	FLNB	30.5485	0.000287949	7.73154e-06	0.412427	AvC_do	AvM_do	n.s.	-0.597992	-0.827598	0.229606	AS specific	changed in MR
O75380;D6RBT3	O75380;D6RBT3	NDUFS6	31.7738	0.917157	0.0761161	0.268309	n.s.	n.s.	n.s.	0.0238331	0.328719	-0.304886		n.s.
O75381-2;O75381;K7EK59	O75381-2;O75381	PEX14	26.1346	0.993555	0.567497	0.737538	n.s.	n.s.	n.s.	0.00510519	-0.255341	0.260446		n.s.
O75385	O75385	ULK1	24.8822	0.317919	0.298527	0.969537	n.s.	n.s.	n.s.	0.559514	0.612106	-0.0525924		n.s.
O75391;I3L0X5;I3L4C3;I3L0Q5	O75391;I3L0X5;I3L4C3	SPAG7	25.7754	0.979734	0.752667	0.851005	n.s.	n.s.	n.s.	0.0110744	-0.131867	0.142941		n.s.
O75394	O75394	MRPL33	25.1085	0.69635	0.79075	0.966355	n.s.	n.s.	n.s.	-0.189862	-0.140676	-0.0491856		n.s.
O75396;A0A087X1A9	O75396	SEC22B	29.7958	0.151896	0.420491	0.800599	n.s.	n.s.	n.s.	0.171495	0.107222	0.0642731		n.s.
O75420	O75420	GIGYF1	26.1754	0.671447	0.0804349	0.420367	n.s.	n.s.	n.s.	-0.334512	-1.2847	0.95019		n.s.
O75431;O75431-2;C9JNK6;C9JAZ1;F8WE26	O75431;O75431-2;C9JNK6;C9JAZ1	MTX2	32.1934	0.000248437	0.0732455	0.261579	AvC_do	n.s.	n.s.	-0.554755	-0.287312	-0.267444		n.s.
O75436;S4R3Q6;O75436-2;S4R2Y3	O75436;S4R3Q6;O75436-2	VPS26A	29.3238	0.293735	0.208679	0.906699	n.s.	n.s.	n.s.	-0.257278	-0.319873	0.0625947		n.s.
O75438;O75438-2	O75438;O75438-2	NDUFB1	31.3996	2.44518e-06	0.00158062	0.366363	AvC_do	AvM_do	n.s.	-0.907566	-0.627197	-0.280369	AS specific	changed in MR
O75439;G3V0E4;F8WAZ6;F8WEA6;F8WBE1	O75439;G3V0E4	PMPCB	30.3591	0.227129	0.720206	0.676742	n.s.	n.s.	n.s.	-0.137021	-0.0479279	-0.0890933		n.s.
O75475;O75475-3;O75475-2;V9GYT7	O75475;O75475-3;O75475-2	PSIP1	26.4027	0.352861	0.0440167	0.516467	n.s.	AvM_do	n.s.	-0.393898	-0.861731	0.467833		changed in MR
O75489;E9PS48;O75489-2;G3V194;E9PKL8;E9PJE7	O75489	NDUFS3	34.622	3.04166e-06	0.201998	0.0110071	AvC_do	n.s.	MvC_do	-0.690231	-0.198365	-0.491866	shared	n.s.
O75506	O75506	HSBP1	27.5768	0.744727	0.814031	0.972547	n.s.	n.s.	n.s.	-0.161478	-0.124952	-0.0365262		n.s.
O75521-2	O75521-2	ECI2	32.8854	0.00091241	0.0613018	0.447688	AvC_do	n.s.	n.s.	-0.372793	-0.224121	-0.148672		n.s.
O75531;E9PJJ8	O75531	BANF1	30.1715	0.16308	0.324167	0.0824669	n.s.	n.s.	n.s.	0.356632	-0.273832	0.630463		n.s.
O75533;H7C341;B4DGZ4;O75533-2;F8WC19	O75533	SF3B1	28.2687	0.254029	0.13121	0.847494	n.s.	n.s.	n.s.	-0.290081	-0.396055	0.105974		n.s.
O75534-4;O75534-3	O75534-4;O75534-3	CSDE1	28.4315	0.560232	0.779267	0.593306	n.s.	n.s.	n.s.	0.103649	-0.0563137	0.159963		n.s.
O75569;O75569-3;O75569-2;G5E9Q4;F8WEG8;C9JMM3	O75569;O75569-3;O75569-2;G5E9Q4	PRKRA	28.814	0.216299	0.139202	0.893607	n.s.	n.s.	n.s.	-0.361647	-0.450171	0.0885245		n.s.
O75592;O75592-2;H7C3U4;A0A087WY34;A0A0C4DGY7	O75592;O75592-2	MYCBP2	26.2978	0.881132	0.21539	0.354645	n.s.	n.s.	n.s.	-0.152741	1.09778	-1.25052		n.s.
O75600;O75600-2;H7BZ75;C9IZC9;F2Z340	O75600;O75600-2	GCAT	26.4183	0.569213	0.198297	0.185912	n.s.	n.s.	n.s.	-0.406162	0.897415	-1.30358		n.s.
O75608;O75608-2;B4DP64;E5RGR0	O75608;O75608-2;B4DP64;E5RGR0	LYPLA1	29.4625	0.654806	0.0213833	0.0345738	n.s.	AvM_up	MvC_do	-0.0859481	0.413788	-0.499736	MR sepcific	changed in AS
O75643;O75643-2;B4E0P5	O75643	SNRNP200	27.7559	0.0215538	0.00323342	0.667374	AvC_do	AvM_do	n.s.	-0.931802	-1.27121	0.339411	AS specific	changed in MR
O75663;O75663-2	O75663;O75663-2	TIPRL	28.8447	0.124415	0.236428	0.0429984	n.s.	n.s.	MvC_do	-0.392158	0.323362	-0.71552		n.s.
O75665-3;O75665;A6NF31;O75665-2;A0A0A0MS89	O75665-3;O75665;A6NF31	OFD1	24.4945	0.61963	0.57967	0.969537	n.s.	n.s.	n.s.	-0.256179	-0.301602	0.0454227		n.s.
O75683	O75683	SURF6	26.2169	0.0737946	0.63189	0.488716	n.s.	n.s.	n.s.	1.17042	0.372972	0.797447		n.s.
O75688;C9JIR6;A0A3B3IS24;O75688-4;O75688-2;B8ZZF0;O75688-5;O75688-3	O75688;C9JIR6;A0A3B3IS24;O75688-4;O75688-2;B8ZZF0;O75688-5	PPM1B	25.5349	0.414206	0.186872	0.799666	n.s.	n.s.	n.s.	0.35216	0.573511	-0.221351		n.s.
O75694;E9PF10;O75694-2;D6RA13	O75694;E9PF10;O75694-2	NUP155	25.337	0.0535559	0.17668	0.830724	n.s.	n.s.	n.s.	-0.805389	-0.606468	-0.198921		n.s.
O75746;O75746-2;F8W9J0;H0YFB2;B4DGK6	O75746;O75746-2	SLC25A12	34.7675	0.000337749	0.259476	0.112481	AvC_do	n.s.	n.s.	-0.356486	-0.122484	-0.234002		n.s.
O75781;O75781-2;A0A087WTK8;A0A087WWY4	O75781;O75781-2	PALM	26.0454	0.954214	0.844681	0.893097	n.s.	n.s.	n.s.	0.0285207	-0.0959686	0.124489		n.s.
O75821;K7EL20;K7ENA8;K7EP16	O75821;K7EL20;K7ENA8	EIF3G	28.2844	0.82263	0.835465	0.998527	n.s.	n.s.	n.s.	-0.0589466	-0.0578583	-0.00108825		n.s.
O75822;O75822-2;O75822-3;H0YGJ7;H0YLP3	O75822;O75822-2;O75822-3	EIF3J	26.693	0.155749	0.735981	0.575236	n.s.	n.s.	n.s.	-0.59518	-0.17041	-0.42477		n.s.
O75828	O75828	CBR3	27.6758	0.769194	0.497564	0.530029	n.s.	n.s.	n.s.	-0.186838	0.428	-0.614839		n.s.
O75832;B1AJY7;B1AJY5;O75832-2;B1AJY6	O75832;B1AJY7;B1AJY5;O75832-2	PSMD10	26.1022	0.787397	0.837907	0.978487	n.s.	n.s.	n.s.	0.104268	0.083677	0.0205913		n.s.
O75844	O75844	ZMPSTE24	28.6453	0.000276079	0.00168772	0.898113	AvC_do	AvM_do	n.s.	-0.966409	-0.887695	-0.0787144	AS specific	changed in MR
O75864;F5H3P7	O75864	PPP1R37	24.3143	0.919287	0.00323342	0.0166938	n.s.	AvM_do	MvC_up	0.0497617	-1.18789	1.23766	MR sepcific	changed in MR
O75874;C9J4N6;C9JLU6;C9JJE5	O75874;C9J4N6	IDH1	30.9834	0.713587	0.143132	0.524395	n.s.	n.s.	n.s.	-0.0390909	-0.144483	0.105392		n.s.
O75880;J3QL56;J3QR42	O75880;J3QL56	SCO1	29.8015	0.345291	0.0552835	0.0283533	n.s.	n.s.	MvC_do	-0.197247	0.403922	-0.601169		n.s.
O75884;O75884-2	O75884;O75884-2	RBBP9	25.0523	0.00687643	0.00656876	0.941895	AvC_up	AvM_up	n.s.	0.993201	1.06124	-0.0680401	AS specific	changed in AS
O75891;O75891-3;O75891-2;O75891-4;C9IZ36;C9JYZ6;C9JY00;D6RFJ7;F2Z324;F8WC34	O75891;O75891-3;O75891-2	ALDH1L1	28.2336	0.000393464	0.0531637	0.372211	AvC_do	n.s.	n.s.	-1.29449	-0.75049	-0.544002		n.s.
O75915;F8WF90;C9JQU6;F8WF33	O75915	ARL6IP5	32.21	0.00412479	0.636269	0.127051	AvC_do	n.s.	n.s.	-0.389627	-0.0774993	-0.312128		n.s.
O75923-8;O75923-14;O75923-2;O75923;O75923-11;O75923-10;O75923-9;O75923-5;O75923-4;O75923-13;O75923-3;O75923-12;O75923-7;O75923-6;O75923-15	O75923-8;O75923-14;O75923-2;O75923;O75923-11;O75923-10;O75923-9;O75923-5;O75923-4;O75923-13;O75923-3;O75923-12;O75923-7;O75923-6;O75923-15	DYSF	33.0708	0.943156	0.83431	0.945856	n.s.	n.s.	n.s.	-0.0127473	-0.0369104	0.0241631		n.s.
O75934	O75934	BCAS2	24.687	0.409993	0.00207236	0.103404	n.s.	AvM_do	n.s.	-0.308222	-1.14368	0.835457		changed in MR
O75935;O75935-3;X6RCK5;X6RA56;X6RLR1;O75935-2;A0A0A0MRV8	O75935;O75935-3;X6RCK5;X6RA56;X6RLR1;O75935-2;A0A0A0MRV8	DCTN3	27.2939	0.233936	0.129565	0.862804	n.s.	n.s.	n.s.	-0.43593	-0.575431	0.139501		n.s.
O75937;S4R3J5	O75937	DNAJC8	25.6913	0.63976	0.823775	0.913669	n.s.	n.s.	n.s.	0.226698	0.119926	0.106772		n.s.
O75947;O75947-2;F5H608	O75947;O75947-2	ATP5PD	35.4698	0.000247138	0.524362	0.0355511	AvC_do	n.s.	MvC_do	-0.426307	-0.0862365	-0.340071	shared	n.s.
O75953-4;O75953-5;O75953;H0YFL9;H0YH04;Q5T657;H7C5W0;H0Y4S1	O75953-4;O75953-5;O75953;H0YFL9;H0YH04	DNAJB5	25.5967	0.622097	0.473055	0.420253	n.s.	n.s.	n.s.	-0.237568	0.355037	-0.592606		n.s.
O75955;A0A140T9R1;O75955-2;A0A140T9W4;A2AB10;A0A140T9X0;A2AB12;A2AB09;A2AB13;A0A0G2JJQ6;A0A140T959;A2AB11;A0A140T974;A0A140T9C3;A0A140T9B1;A0A140T957;A0A140T910;A0A140T907;A0A140T905;A2ABJ5	O75955;A0A140T9R1;O75955-2;A0A140T9W4	FLOT1	31.0196	0.0023426	0.971467	0.0321804	AvC_up	n.s.	MvC_up	0.329977	0.00468471	0.325292	shared	n.s.
O75964	O75964	ATP5MG	34.0681	0.00519233	0.298446	0.313829	AvC_do	n.s.	n.s.	-0.399927	-0.164986	-0.234942		n.s.
O76003	O76003	GLRX3	29.0618	0.00029154	0.231706	0.117211	AvC_do	n.s.	n.s.	-0.669937	-0.239719	-0.430218		n.s.
O76021;J3QSV6;I3L3U9;I3L3C4;O76021-2;I3L234;I3L1A3;J3KPU7;I3L2F2;I3L4T8;I3L1Y4	O76021;J3QSV6;I3L3U9	RSL1D1	25.6237	0.516634	0.478082	0.354954	n.s.	n.s.	n.s.	-0.430318	0.496247	-0.926565		n.s.
O76024;H0Y9G5	O76024	WFS1	29.3128	0.00065499	0.0579701	4.74991e-05	AvC_up	n.s.	MvC_up	0.535887	-0.318073	0.85396	shared	n.s.
O76031;H0YM48;H0YK07	O76031	CLPX	26.7227	0.953291	0.325492	0.582477	n.s.	n.s.	n.s.	-0.0255082	-0.372669	0.34716		n.s.
O76041;A0A0U1RQY0;A0A0U1RRK0;Q5JUU7	O76041	NEBL	35.5046	0.0172574	0.937149	0.127533	AvC_up	n.s.	n.s.	0.241218	0.00981032	0.231407		n.s.
O76062;O76062-2;E9PS18;E9PS09;E9PQZ7;E9PP79;E9PLL1;E9PLS9;E9PK81;E9PRQ1;E9PLI3;H0YDY5;H0YEN6;E9PQ50;H0YCI8	O76062;O76062-2;E9PS18;E9PS09;E9PQZ7;E9PP79;E9PLL1;E9PLS9	TM7SF2	27.5138	0.00483969	0.226473	0.374996	AvC_up	n.s.	n.s.	0.659101	0.309375	0.349726		n.s.
O76070;F8W754	O76070	SNCG	26.1795	0.713587	0.576179	0.918876	n.s.	n.s.	n.s.	0.167546	0.261198	-0.0936527		n.s.
O76094;O76094-2;D6RDY6;R4GNC1	O76094;O76094-2;D6RDY6	SRP72	27.6086	0.095676	0.926102	0.250915	n.s.	n.s.	n.s.	-0.534178	0.0379774	-0.572155		n.s.
O94760;B4DYP1;O94760-2	O94760;B4DYP1;O94760-2	DDAH1	29.0043	0.00799297	0.698292	0.148907	AvC_up	n.s.	n.s.	0.645373	0.114796	0.530577		n.s.
O94788;H0YMG7;O94788-2;O94788-3;O94788-4;H0YKL3;E9PF31	O94788;H0YMG7;O94788-2;O94788-3;O94788-4	ALDH1A2	27.5	0.786778	0.193871	0.275675	n.s.	n.s.	n.s.	0.177055	-0.775471	0.952526		n.s.
O94804;H0YB71	O94804	STK10	26.476	0.904858	0.898536	0.890929	n.s.	n.s.	n.s.	-0.0529517	0.0566437	-0.109595		n.s.
O94811	O94811	TPPP	27.9666	0.0306178	0.0255735	0.930761	AvC_do	AvM_do	n.s.	-0.854546	-0.937549	0.0830038	AS specific	changed in MR
X6R3P0;O94813-3;O94813-2;O94813;A0A087WYV5;H0Y9Z6;F5H0U4	X6R3P0;O94813-3;O94813-2;O94813;A0A087WYV5	SLIT2	26.6504	0.0126814	0.644131	0.212121	AvC_up	n.s.	n.s.	1.57063	0.351639	1.21899		n.s.
O94826	O94826	TOMM70	30.6635	0.000763944	0.00316905	0.92416	AvC_do	AvM_do	n.s.	-0.408857	-0.381514	-0.0273435	AS specific	changed in MR
O94855;O94855-2;E9PDM8;E9PC44	O94855;O94855-2;E9PDM8;E9PC44	SEC24D	28.4116	0.515188	0.901965	0.648736	n.s.	n.s.	n.s.	-0.740897	0.166697	-0.907594		n.s.
O94874;O94874-2;O94874-3	O94874;O94874-2;O94874-3	UFL1	28.928	1.0292e-05	0.000226014	0.827369	AvC_do	AvM_do	n.s.	-0.9017	-0.804464	-0.0972366	AS specific	changed in MR
O94875-10;O94875-3;H7BZX1;C9J3W4;C9JL62;C9IZ89	O94875-10;O94875-3	SORBS2	35.6545	2.35635e-08	0.00562586	0.0262643	AvC_up	AvM_up	MvC_up	0.766428	0.373792	0.392636	shared	changed in AS
O94875-11;O94875;H7BZK1	O94875-11;O94875	SORBS2	25.0035	0.176688	0.9655	0.394559	n.s.	n.s.	n.s.	0.643709	-0.0247528	0.668462		n.s.
O94875-12;O94875-4;H7BXR3;O94875-5;C9JDX2;C9JI79;C9IZT7;C9JBB0;C9JEA9;C9J4Z9;C9JZ60;C9J372;C9J620;C9JFS9;C9JC90;C9J9D3;C9J348	O94875-12;O94875-4;H7BXR3;O94875-5	SORBS2	25.5611	0.0251874	0.346475	0.508217	AvC_up	n.s.	n.s.	1.06377	0.50039	0.563377		n.s.
O94875-2	O94875-2	SORBS2	30.7335	0.5393	0.0445187	0.379898	n.s.	AvM_do	n.s.	-0.143551	-0.45749	0.313939		changed in MR
O94875-7	O94875-7	SORBS2	25.9629	9.30583e-07	0.00580418	0.144056	AvC_up	AvM_up	n.s.	2.64839	1.50969	1.1387	AS specific	changed in AS
O94875-8	O94875-8	SORBS2	24.8581	0.00263003	0.497423	0.143299	AvC_up	n.s.	n.s.	1.36443	0.359851	1.00458		n.s.
O94901-9;E9PHI4;O94901-8;O94901;O94901-5;O94901-6;H0Y742;H0Y6N5;H7C2K3;O94901-3;O94901-2;O94901-7;C9JK55;C9K051;H7C3X3;C9JS54;C9JJU6;C9JR15;O94901-4	O94901-9;E9PHI4;O94901-8;O94901;O94901-5;O94901-6;H0Y742;H0Y6N5	SUN1	29.1914	0.735562	0.310107	0.720161	n.s.	n.s.	n.s.	-0.0788773	-0.224344	0.145467		n.s.
O94903;E5RG77;E5RFX7;E5RFZ4;H0YBG2	O94903;E5RG77	PLPBP	29.1823	0.133837	0.0529674	0.804333	n.s.	n.s.	n.s.	-0.245225	-0.332158	0.086933		n.s.
O94911-3;A0A0A0MSU4;O94911;A0A075B774;O94911-2;Q49AI9;K7ELK9;H0Y7M0	O94911-3;A0A0A0MSU4;O94911	ABCA8	29.0194	0.127476	0.000732933	0.17255	n.s.	AvM_do	n.s.	-0.650369	-1.52109	0.870724		changed in MR
O94915;F2Z2S2;A0A2C9F2R7;A0A286YEZ9;H0Y9X0;D6RJI4;O94915-2	O94915;F2Z2S2;A0A2C9F2R7	FRYL	27.6026	0.286617	0.233653	0.943707	n.s.	n.s.	n.s.	-0.73622	-0.855602	0.119382		n.s.
O94919	O94919	ENDOD1	27.4113	0.239238	0.99664	0.492166	n.s.	n.s.	n.s.	0.571994	-0.00214183	0.574136		n.s.
O94925;H7BZD1;C9JIJ6;O94925-2;H7C201	O94925	GLS	28.9556	0.0024607	0.000135655	0.514554	AvC_do	AvM_do	n.s.	-0.938719	-1.30324	0.364518	AS specific	changed in MR
Q4G104;O94952-1;O94952;H0YIE9;H0YHF6	Q4G104;O94952-1;O94952;H0YIE9;H0YHF6	FBXO21	24.9921	0.922552	0.487446	0.73912	n.s.	n.s.	n.s.	-0.0437337	-0.284823	0.241089		n.s.
O94966-7;O94966-6;E7EST9;O94966-4;O94966-3;O94966-5;B5MEG5;O94966;E7ESU0;O94966-2;A0A0A0MR08;H0YB23	O94966-7;O94966-6;E7EST9;O94966-4;O94966-3;O94966-5;B5MEG5;O94966;E7ESU0	USP19	27.6794	0.377113	0.539527	0.92466	n.s.	n.s.	n.s.	-0.823148	-0.629921	-0.193228		n.s.
O94973;O94973-2;A0A0G2JS82;O94973-3;A0A0G2JQM1;E9PR62;A0A0G2JRF9;A0A0G2JQA4;A0A0G2JRS3;A0A0G2JQT9;H0YEG0;E9PNC4;A0A0G2JS17;H0YDE9;E9PQP4;M0R2D9;E9PPY8;E9PPZ3;E9PS94	O94973;O94973-2;A0A0G2JS82;O94973-3;A0A0G2JQM1	AP2A2	29.1957	0.0448801	0.000386507	0.243734	AvC_do	AvM_do	n.s.	-0.484462	-0.925061	0.440599	AS specific	changed in MR
O95139;A0A087WZX2	O95139;A0A087WZX2	NDUFB6	31.7412	0.0040584	0.48025	0.181421	AvC_do	n.s.	n.s.	-0.363325	-0.10373	-0.259595		n.s.
O95140;O95140-2;Q5JXC5	O95140;O95140-2	MFN2	31.3684	0.297624	0.139583	0.823239	n.s.	n.s.	n.s.	-0.118409	-0.172206	0.0537973		n.s.
O95155;O95155-4;O95155-2;O95155-3;K7EP75;K7ERA7;B1AQ61	O95155;O95155-4;O95155-2;O95155-3	UBE4B	24.8099	0.907348	0.0255735	0.142172	n.s.	AvM_do	n.s.	-0.0629891	-0.984972	0.921983		changed in MR
Q6FGG4;O95167;S4R3I5;H7C0D7;H7C2R1;A8MVM8;S4R3T6;A8MYJ8	Q6FGG4;O95167;S4R3I5	NDUFA3	31.4333	0.666068	0.12789	0.528942	n.s.	n.s.	n.s.	0.105425	0.348289	-0.242864		n.s.
O95168;O95168-2;C9JXQ9;F2Z3P9	O95168;O95168-2;C9JXQ9;F2Z3P9	NDUFB4	32.9292	2.51927e-06	0.0152049	0.124697	AvC_do	AvM_do	n.s.	-0.6807	-0.359782	-0.320918	AS specific	changed in MR
O95169-3;O95169;E9PQ68;O95169-2;K9J7I2;E9PIZ8	O95169-3;O95169;E9PQ68;O95169-2;K9J7I2	NDUFB8	32.5745	0.000635652	0.000597737	0.905335	AvC_do	AvM_do	n.s.	-0.630626	-0.681371	0.0507444	AS specific	changed in MR
O95182	O95182	NDUFA7	32.0426	0.338555	0.0255735	0.428267	n.s.	AvM_up	n.s.	0.157279	0.369743	-0.212464		changed in AS
O95183	O95183	VAMP5	25.1041	0.897205	0.0964092	0.208754	n.s.	n.s.	n.s.	0.0725854	-0.777506	0.850091		n.s.
O95197-3;O95197-6;B7Z4M1	O95197-3	RTN3	28.8244	0.00810584	0.29576	0.376574	AvC_up	n.s.	n.s.	0.623856	0.272794	0.351061		n.s.
O95202;O95202-2;O95202-3	O95202	LETM1	32.3861	0.0226829	0.23422	0.60015	AvC_do	n.s.	n.s.	-0.229945	-0.13093	-0.0990147		n.s.
O95208-2;I3L2B2;O95208-3;O95208;F6PQP6;E9PBC1;O95208-5;I3L2H1;J3KSF8;J3KTF6;J3KSA6;J3KSC7;J3QLN2	O95208-2;I3L2B2;O95208-3;O95208;F6PQP6;E9PBC1;O95208-5;I3L2H1	EPN2	24.2465	0.10144	0.225677	0.883332	n.s.	n.s.	n.s.	-0.533651	-0.423588	-0.110063		n.s.
O95210	O95210	STBD1	30.8066	0.0523063	0.00106904	0.349175	n.s.	AvM_up	n.s.	0.290791	0.521693	-0.230902		changed in AS
O95278;H0Y6I8;O95278-2;O95278-8;O95278-7;A0A1W2PPT8;O95278-4;O95278-6;A0A1W2PQ84;A0A1W2PRS5	O95278;H0Y6I8;O95278-2;O95278-8;O95278-7	EPM2A	29.2093	0.763061	0.361783	0.422963	n.s.	n.s.	n.s.	0.119382	-0.344523	0.463905		n.s.
O95292;E5RK64;O95292-2	O95292	VAPB	30.6328	0.0836164	0.821062	0.38339	n.s.	n.s.	n.s.	-0.195091	-0.0316412	-0.163449		n.s.
O95295	O95295	SNAPIN	24.9527	0.301502	0.45041	0.926811	n.s.	n.s.	n.s.	-0.396723	-0.317255	-0.079468		n.s.
O95298;E9PM14;A0A087WUM3;E9PQ53;O95298-2;O95298-3;E9PRJ5;E9PRQ4;A0A087WY27	O95298;E9PM14;A0A087WUM3;E9PQ53;O95298-2	NDUFC2	32.5	0.634549	0.803551	0.92466	n.s.	n.s.	n.s.	0.0771582	0.0451252	0.032033		n.s.
O95302;O95302-3;O95302-2;C9J4P8;Q75LS8	O95302;O95302-3;O95302-2	FKBP9	26.7102	0.416583	0.126465	0.699653	n.s.	n.s.	n.s.	-0.194436	-0.364419	0.169983		n.s.
O95336;M0R261;M0R1L2;M0R0U3	O95336;M0R261	PGLS	29.3624	0.972394	0.951378	0.988172	n.s.	n.s.	n.s.	0.00800501	0.0137061	-0.00570104		n.s.
O95342;A0A3B3ISD4;Q53S60;A0A3B3IS78	O95342;A0A3B3ISD4;Q53S60;A0A3B3IS78	ABCB11	26.1771	0.762577	0.193871	0.265595	n.s.	n.s.	n.s.	0.252833	-1.00489	1.25773		n.s.
O95352;O95352-3;O95352-2;C9JFF4;C9J415;H7C2R3;H7BZ92;C9JE55;H7C2J8;C9JNU2;C9JKA3;C9JGL2;F8WDY9;H7C059;H7C369	O95352;O95352-3;O95352-2	ATG7	25.781	0.0128034	0.0741683	0.788825	AvC_do	n.s.	n.s.	-1.0964	-0.840934	-0.25547		n.s.
O95359;O95359-5;Q4VXL8;O95359-1;D6RAA5;O95359-6;E9PGB3;H0Y9C3;H0Y954;H0Y8P9;A0A0U1RRM9;H0YA73	O95359	TACC2	28.6527	0.0226154	0.0117595	0.862804	AvC_do	AvM_do	n.s.	-0.449371	-0.527858	0.0784873	AS specific	changed in MR
O95363;A0A3B3ITR6;Q5JRF7;R4GMX6	O95363;A0A3B3ITR6	FARS2	25.8343	0.00645429	0.185413	0.470357	AvC_do	n.s.	n.s.	-1.00168	-0.531015	-0.470661		n.s.
O95372;Q5QPQ0;Q5QPQ1;Q5QPQ3;Q5QPQ2;Q5QPN9;Q5QPN5	O95372;Q5QPQ0;Q5QPQ1;Q5QPQ3;Q5QPQ2	LYPLA2	28.3427	0.0807489	0.791955	0.165669	n.s.	n.s.	n.s.	-0.797622	0.149878	-0.9475		n.s.
O95373;E9PLB2;E9PLJ0	O95373	IPO7	30.0869	0.000779104	0.00838492	0.793494	AvC_do	AvM_do	n.s.	-0.687573	-0.570963	-0.11661	AS specific	changed in MR
O95376;C9JZ71;C9JCL4;F8WCS4;C9JBC5	O95376	ARIH2	25.8236	0.477136	0.827734	0.571064	n.s.	n.s.	n.s.	-0.293524	0.104639	-0.398163		n.s.
O95394;O95394-3;O95394-4;J3KN95;A0A087WT27;D6RCQ8;D6RF77;D6RIS6;H0Y987;H0Y8I3;D6RCD1;D6RC77	O95394;O95394-3;O95394-4;J3KN95;A0A087WT27	PGM3	26.9066	0.91657	0.515276	0.769046	n.s.	n.s.	n.s.	0.0467424	0.257598	-0.210855		n.s.
O95425;O95425-3;O95425-4;O95425-2	O95425;O95425-3;O95425-4;O95425-2	SVIL	31.7528	3.84915e-14	0.00776811	3.17171e-06	AvC_up	AvM_up	MvC_up	0.793894	0.245056	0.548838	shared	changed in AS
O95428-6;O95428;O95428-5;O95428-4;G3V5P6;B5MDP7;O95428-2;H0YMM2;H0YJA1;O95428-3	O95428-6;O95428;O95428-5;O95428-4;G3V5P6	PAPLN	24.9182	0.0726338	0.217481	0.0219021	n.s.	n.s.	MvC_up	0.74588	-0.551631	1.29751		n.s.
O95433;O95433-2;G3V438;H0YJG7;H0YJU2;G3V3W9;H0YJ63	O95433;O95433-2;G3V438;H0YJG7	AHSA1	29.4709	0.00087276	0.0235342	0.630035	AvC_do	AvM_do	n.s.	-0.540149	-0.391156	-0.148993	AS specific	changed in MR
O95445;O95445-2;Q5SRP5	O95445;O95445-2;Q5SRP5	APOM	25.8066	0.383252	0.266859	0.154184	n.s.	n.s.	n.s.	0.538815	-0.703813	1.24263		n.s.
R4GMU1;O95479	R4GMU1;O95479	H6PD	27.4849	0.303431	0.0219827	0.430961	n.s.	AvM_do	n.s.	-0.401549	-0.906566	0.505017		changed in MR
O95487-2;O95487;O95487-3	O95487-2;O95487;O95487-3	SEC24B	26.3582	0.445908	0.886467	0.760796	n.s.	n.s.	n.s.	-0.3581	-0.0797754	-0.278325		n.s.
O95571;M0QXB5;M0QY80;M0QX80	O95571;M0QXB5	ETHE1	28.3815	0.084228	0.0700923	0.941451	n.s.	n.s.	n.s.	-0.276175	-0.305436	0.0292609		n.s.
O95573;F5H062;C9JC11;F5GWH2	O95573	ACSL3	29.5156	0.00225693	0.0732455	0.530029	AvC_do	n.s.	n.s.	-0.588422	-0.369051	-0.219371		n.s.
O95622;B3KWA8;O95622-2;C9JRT8;C9JQ38	O95622;B3KWA8;O95622-2	ADCY5	27.6143	0.121207	0.00849637	0.501483	n.s.	AvM_do	n.s.	-0.670241	-1.18076	0.51052		changed in MR
O95630;C9JK83;O95630-2;F5H5B9;C9JEK5;C9JZ93	O95630;C9JK83;O95630-2	STAMBP	25.1427	0.261087	0.681907	0.745917	n.s.	n.s.	n.s.	-0.71255	-0.303391	-0.409158		n.s.
O95671-2;O95671;O95671-3	O95671-2;O95671;O95671-3	ASMTL	28.504	0.00265978	0.0801688	0.535607	AvC_up	n.s.	n.s.	1.023	0.639192	0.383806		n.s.
O95674;Q92903	O95674	CDS2	29.6415	0.00246514	0.00195528	0.900138	AvC_up	AvM_up	n.s.	0.451349	0.494856	-0.0435062	AS specific	changed in AS
O95714;A0A0J9YVP0;A0A0G2JPS8;A0A0J9YXQ8;Q9BVR0	O95714	HERC2	27.0137	0.00648905	0.0413891	0.808086	AvC_up	AvM_up	n.s.	2.00292	1.60949	0.393426	AS specific	changed in AS
O95721;C9JAF7	O95721;C9JAF7	SNAP29	25.2326	0.00368723	0.218407	0.346987	AvC_do	n.s.	n.s.	-1.02488	-0.473783	-0.551098		n.s.
O95747;C9JIG9;F8WBK9	O95747;C9JIG9	OXSR1	29.5871	0.245038	0.797406	0.356201	n.s.	n.s.	n.s.	0.125357	-0.0336879	0.159045		n.s.
O95757;E9PDE8	O95757;E9PDE8	HSPA4L	27.1542	0.0130207	0.0189173	0.992876	AvC_do	AvM_do	n.s.	-0.778196	-0.783584	0.00538758	AS specific	changed in MR
O95777;F2Z2Y6;C9JIZ0;C9JNV3	O95777;F2Z2Y6;C9JIZ0;C9JNV3	LSM8	25.9814	0.457984	0.747095	0.860856	n.s.	n.s.	n.s.	-0.318371	-0.158718	-0.159652		n.s.
O95782-2;O95782	O95782-2;O95782	AP2A1	30.2169	0.00170624	0.00018625	0.604196	AvC_do	AvM_do	n.s.	-0.285482	-0.373786	0.0883048	AS specific	changed in MR
O95793-2;O95793;Q5JW30;A0A087X1A5;F6UDC6	O95793-2;O95793;Q5JW30;A0A087X1A5	STAU1	27.0839	0.440605	0.0588497	0.513758	n.s.	n.s.	n.s.	-0.21709	-0.522369	0.305279		n.s.
O95810	O95810	CAVIN2	32.5515	0.0452427	0.218397	0.745917	AvC_do	n.s.	n.s.	-0.188591	-0.125536	-0.0630552		n.s.
O95816;O95816-2	O95816;O95816-2	BAG2	28.1752	0.435254	0.362795	0.235001	n.s.	n.s.	n.s.	-0.252302	0.304086	-0.556388		n.s.
O95817	O95817	BAG3	32.1745	0.352861	0.0519579	0.549024	n.s.	n.s.	n.s.	0.118251	0.249323	-0.131072		n.s.
O95822;O95822-2;V9GYW3;V9GY18;A0A087X1B8	O95822;O95822-2	MLYCD	32.0462	0.125244	0.60361	0.617717	n.s.	n.s.	n.s.	-0.194017	-0.0771716	-0.116845		n.s.
O95831;O95831-3;O95831-2;E9PMA0;O95831-5;O95831-4;O95831-6	O95831;O95831-3;O95831-2;E9PMA0;O95831-5	AIFM1	34.5287	0.00470689	0.437398	0.214026	AvC_do	n.s.	n.s.	-0.290038	-0.0915071	-0.198531		n.s.
O95834-3	O95834-3	EML2	29.9843	0.00286597	0.103997	0.48892	AvC_up	n.s.	n.s.	0.359215	0.210522	0.148693		n.s.
O95861;O95861-2;O95861-4;O95861-3;F8VVW8;F8W1J0;F8VZG4;F8VRY7	O95861;O95861-2;O95861-4;O95861-3	BPNT1	28.8023	0.316184	0.903016	0.638788	n.s.	n.s.	n.s.	0.193546	0.0289971	0.164549		n.s.
O95865;A0A140T971;Q5SSV3;Q5SRR8;H0Y7N1	O95865;A0A140T971;Q5SSV3;Q5SRR8;H0Y7N1	DDAH2	29.9729	3.16913e-07	0.17303	0.00372641	AvC_up	n.s.	MvC_up	0.745826	0.204953	0.540872	shared	n.s.
O95881;V9GY50;V9GYV4	O95881	TXNDC12	26.9558	0.579151	0.946533	0.807801	n.s.	n.s.	n.s.	-0.168087	-0.0229325	-0.145155		n.s.
O95967;E9PRU1;H0YET5;H0YEU0;E9PI47;E9PRQ8;E9PKA3;H0YCR9	O95967;E9PRU1	EFEMP2	25.3721	0.0001805	0.066849	0.246059	AvC_up	n.s.	n.s.	1.74001	0.899703	0.840304		n.s.
O96000;O96000-2;H3BV16;H3BPJ9	O96000;O96000-2;H3BV16;H3BPJ9	NDUFB10	33.3096	0.0217708	0.0279197	0.984427	AvC_do	AvM_do	n.s.	-0.306128	-0.312145	0.00601663	AS specific	changed in MR
O96007	O96007	MOCS2	25.8627	0.866215	0.545067	0.819774	n.s.	n.s.	n.s.	0.0726202	0.24667	-0.17405		n.s.
O96008;O96008-2;K7EKG4;K7EJ57	O96008;O96008-2;K7EKG4;K7EJ57	TOMM40	29.8583	0.0560954	0.116884	0.918198	n.s.	n.s.	n.s.	-0.262246	-0.229408	-0.0328379		n.s.
O96011-2;O96011;H7C3V6	O96011-2;O96011	PEX11B	23.5623	0.654806	0.165416	0.192047	n.s.	n.s.	n.s.	-0.197134	0.579636	-0.77677		n.s.
O96018	O96018	APBA3	26.3748	0.715297	0.76271	0.984427	n.s.	n.s.	n.s.	0.344099	0.307189	0.0369103		n.s.
O96019;O96019-2;H7C5S0;C9JQT2;O94805	O96019;O96019-2;H7C5S0	ACTL6A	26.3847	0.305119	0.056047	0.605785	n.s.	n.s.	n.s.	-0.349911	-0.663407	0.313496		n.s.
P00156	P00156	MT-CYB	30.1943	0.493608	0.189246	0.742588	n.s.	n.s.	n.s.	-0.232497	-0.444034	0.211537		n.s.
P00167;P00167-2;P00167-3;J3KNC7	P00167;P00167-2;P00167-3	CYB5A	30.4323	0.646441	0.0583457	0.372211	n.s.	n.s.	n.s.	0.105256	0.408234	-0.302978		n.s.
P00325;V9HW50;P00325-2;D6RHZ6;P07327;H0Y9N0	P00325;V9HW50;P00325-2;D6RHZ6;P07327	ADH1B	32.1387	0.636747	0.442943	0.407941	n.s.	n.s.	n.s.	0.19763	-0.325082	0.522711		n.s.
P00326;A0A087WU81;A0A087WUC4	P00326;A0A087WU81	ADH1C	28.2035	0.712089	0.618093	0.948679	n.s.	n.s.	n.s.	0.331574	0.461829	-0.130256		n.s.
P00338;P00338-3;P00338-5;P00338-4;P00338-2;F5GXY2;F5GYU2;F5GXH2;F5H5J4;F5H6W8;F5GZQ4;F5H8H6;F5GXC7;F5GWW2;F5GXU1;A0A087WUM2	P00338;P00338-3;P00338-5;P00338-4;P00338-2;F5GXY2	LDHA	33.768	0.399961	0.274745	0.1649	n.s.	n.s.	n.s.	-0.104388	0.139018	-0.243406		n.s.
P00352;Q5SYQ9;Q5SYQ8;Q5SYQ7	P00352	ALDH1A1	31.1044	0.755366	0.00164806	0.00533777	n.s.	AvM_do	MvC_up	0.098996	-0.910302	1.0093	MR sepcific	changed in MR
P00367;P00367-3;P00367-2	P00367;P00367-3;P00367-2	GLUD1	33.4439	0.0533414	0.3943	0.0391721	n.s.	n.s.	MvC_do	-0.151945	0.0751443	-0.227089		n.s.
P00387-3;P00387-2;P00387;B1AHF3	P00387-3;P00387-2;P00387;B1AHF3	CYB5R3	34.2353	0.38285	0.704604	0.414325	n.s.	n.s.	n.s.	0.121906	-0.0601295	0.182036		n.s.
P00390-2;P00390;P00390-3;P00390-4;P00390-5;A0A2R8YF59;H0YC68	P00390-2;P00390;P00390-3;P00390-4;P00390-5	GSR	31.4965	0.619878	0.967079	0.776321	n.s.	n.s.	n.s.	0.0857242	-0.00782955	0.0935537		n.s.
P00395	P00395	MT-CO1	31.9122	0.476456	0.979726	0.712683	n.s.	n.s.	n.s.	-0.211063	-0.00868102	-0.202382		n.s.
P00403	P00403	MT-CO2	35.4275	0.941426	0.000356012	0.00296686	n.s.	AvM_up	MvC_do	-0.0187547	0.763489	-0.782244	MR sepcific	changed in AS
P00414	P00414	MT-CO3	29.6929	0.417445	0.265297	0.882628	n.s.	n.s.	n.s.	0.301693	0.422049	-0.120356		n.s.
P00441	P00441	SOD1	33.3851	0.0338812	0.00303513	0.576596	AvC_up	AvM_up	n.s.	0.326987	0.485789	-0.158802	AS specific	changed in AS
P00450;H7C5N5	P00450	CP	32.1907	0.0164039	0.298446	0.00850941	AvC_up	n.s.	MvC_up	0.695861	-0.332543	1.0284	shared	n.s.
P00488;Q9NQP5;A6PVK5;H0Y796;H0Y4W5	P00488	F13A1	31.3485	0.290572	0.0111413	0.334644	n.s.	AvM_do	n.s.	-0.272071	-0.662065	0.389994		changed in MR
P00491;G3V5M2;G3V2H3;G3V393	P00491;G3V5M2	PNP	28.3035	0.0902314	0.299547	0.791528	n.s.	n.s.	n.s.	-0.750997	-0.500593	-0.250404		n.s.
P00492	P00492	HPRT1	29.4644	0.941335	0.936142	0.93709	n.s.	n.s.	n.s.	-0.0171858	0.0180184	-0.0352041		n.s.
P00505;H3BRE7	P00505	GOT2	36.3413	1.23816e-06	0.0526018	0.0329085	AvC_do	n.s.	MvC_do	-0.500169	-0.204936	-0.295233	shared	n.s.
P00558	P00558	PGK1	35.9382	0.32037	0.557139	0.274078	n.s.	n.s.	n.s.	0.0763737	-0.0506971	0.127071		n.s.
Q5T9B7;P00568;H0YID2	Q5T9B7;P00568	AK1	35.2302	0.349306	0.57967	0.886466	n.s.	n.s.	n.s.	0.1224	0.0811905	0.0412091		n.s.
P00734;E9PIT3;C9JV37;CON__P00735	P00734;E9PIT3	F2	30.0597	0.0304118	0.263152	0.0123395	AvC_up	n.s.	MvC_up	0.648048	-0.367303	1.01535	shared	n.s.
P00738;J3QR68;H0Y300;A0A0C4DGL8;P00738-2;J3QLC9;A0A087WU08;H3BS21;J3KTC3;J3KRH2;J3KSV1;J3QQI8;H3BMJ7	P00738;J3QR68;H0Y300;A0A0C4DGL8;P00738-2;J3QLC9;A0A087WU08	HP	32.0844	0.0977731	0.86193	0.385041	n.s.	n.s.	n.s.	0.925663	0.119515	0.806148		n.s.
P00739;P00739-2;A0A0A0MRD9	P00739;P00739-2;A0A0A0MRD9	HPR	24.7412	0.255662	0.132626	0.0483827	n.s.	n.s.	MvC_up	0.642758	-0.877361	1.52012		n.s.
P00740;P00740-2	P00740;P00740-2	F9	30.642	0.662778	0.674381	0.994791	n.s.	n.s.	n.s.	0.091883	0.0943983	-0.0025153		n.s.
P00747;Q5TEH5;A6PVI2;CON__P06868;Q02325	P00747	PLG	30.7113	0.000464126	0.363846	0.00066787	AvC_up	n.s.	MvC_up	1.04823	-0.302872	1.3511	shared	n.s.
P00748	P00748	F12	27.3015	0.0185137	0.785825	0.189481	AvC_up	n.s.	n.s.	1.03689	0.149807	0.887083		n.s.
P00813;F5GWI4;F5GXW0;F5GYD4	P00813;F5GWI4;F5GXW0	ADA	26.2665	0.195399	0.116014	0.881008	n.s.	n.s.	n.s.	0.664067	0.840381	-0.176314		n.s.
P00846	P00846	MT-ATP6	31.8504	0.00972688	0.663731	0.181421	AvC_do	n.s.	n.s.	-0.782963	-0.160883	-0.622081		n.s.
P00915;E5RHP7;E5RH81;E5RG43;E5RFE7;E5RFL2;E5RGU8;H0YBE2	P00915;E5RHP7;E5RH81;E5RG43;E5RFE7;E5RFL2	CA1	32.0273	1.40428e-09	0.886514	5.4074e-07	AvC_up	n.s.	MvC_up	3.27403	-0.0902519	3.36428	shared	n.s.
P00918;E5RID5;E5RK37	P00918	CA2	30.8014	0.000227789	0.839035	0.00296943	AvC_up	n.s.	MvC_up	0.899307	-0.061562	0.960869	shared	n.s.
P00966;Q5T6L6;Q5T6L5	P00966;Q5T6L6;Q5T6L5	ASS1	29.4487	0.646819	0.231706	0.247237	n.s.	n.s.	n.s.	0.118538	-0.297261	0.415799		n.s.
P01008;Q8TCE1	P01008	SERPINC1	32.592	3.1403e-05	0.994773	0.00145733	AvC_up	n.s.	MvC_up	1.08261	-0.00202992	1.08464	shared	n.s.
P01009;P01009-2;P01009-3	P01009;P01009-2;P01009-3	SERPINA1	35.3109	0.233589	0.764387	0.657719	n.s.	n.s.	n.s.	0.315511	0.0960046	0.219507		n.s.
P01011;G3V595;P01011-2;P01011-3	P01011;G3V595	SERPINA3	32.5094	0.442308	0.671711	0.893097	n.s.	n.s.	n.s.	-0.246721	-0.153592	-0.0931285		n.s.
P01019	P01019	AGT	30.5099	0.802342	0.461025	0.525357	n.s.	n.s.	n.s.	0.0825666	-0.235424	0.317991		n.s.
P01023;F8W7L3;H0YFH1;F5H1E8	P01023	A2M	33.0174	0.000318543	0.17317	0.000118759	AvC_up	n.s.	MvC_up	1.06281	-0.433203	1.49601	shared	n.s.
P01024;M0QYC8;M0QXZ3;M0R1Q1	P01024	C3	34.7425	9.25695e-05	0.522217	0.000387217	AvC_up	n.s.	MvC_up	1.03472	-0.19677	1.23149	shared	n.s.
P01031	P01031	C5	30.6217	0.577021	0.907021	0.69741	n.s.	n.s.	n.s.	0.257888	-0.0623652	0.320254		n.s.
P01034	P01034	CST3	27.1326	0.168108	0.00346881	0.000672817	n.s.	AvM_do	MvC_up	0.483747	-1.06317	1.54692	MR sepcific	changed in MR
P01042	P01042	KNG1	30.8419	3.10958e-05	0.152374	1.78595e-05	AvC_up	n.s.	MvC_up	1.09214	-0.397592	1.48974	shared	n.s.
P01042-2;P01042-3	P01042-2;P01042-3	KNG1	23.8409	0.13833	0.838807	0.265595	n.s.	n.s.	n.s.	0.877025	-0.148292	1.02532		n.s.
P01111	P01111	NRAS	27.5674	0.423918	0.987172	0.665638	n.s.	n.s.	n.s.	-0.207264	-0.0049056	-0.202358		n.s.
P01116-2	P01116-2	KRAS	25.527	0.230689	0.811844	0.617482	n.s.	n.s.	n.s.	-0.425927	-0.102432	-0.323494		n.s.
P01344-3;P01344;P01344-2	P01344-3;P01344;P01344-2	IGF2	24.8223	0.0666628	0.259172	0.774059	n.s.	n.s.	n.s.	0.966401	0.645917	0.320484		n.s.
P01591;D6RD17;D6RHJ6;C9JA05	P01591;D6RD17;D6RHJ6;C9JA05	JCHAIN	26.5146	0.199437	0.193871	0.0554777	n.s.	n.s.	n.s.	0.849954	-0.907343	1.7573		n.s.
P01602	P01602	IGKV1-5	25.4159	0.0206894	0.800445	0.0666546	AvC_up	n.s.	n.s.	1.22866	-0.16894	1.3976		n.s.
P01619	P01619	IGKV3-20	29.1715	0.715978	0.0753048	0.120701	n.s.	n.s.	n.s.	0.201662	-0.909254	1.11092		n.s.
P01624;A0A0C4DH90;A0A0C4DH55;A0A075B6H7	P01624;A0A0C4DH90;A0A0C4DH55	IGKV3-15	27.6926	0.0209364	0.62347	0.039882	AvC_up	n.s.	MvC_up	1.09727	-0.279664	1.37693	shared	n.s.
P01700;CON__ENSEMBL:ENSBTAP00000014147;CON__Q1RMN8	P01700	IGLV1-47	26.4298	0.236988	0.844681	0.38162	n.s.	n.s.	n.s.	0.757777	-0.152243	0.91002		n.s.
P01717;P01718	P01717;P01718	IGLV3-25	25.7556	0.0287334	0.0588497	0.00164416	AvC_up	n.s.	MvC_up	1.34861	-1.24135	2.58997	shared	n.s.
P01721	P01721	IGLV6-57	25.333	0.0116835	0.863773	0.0554574	AvC_up	n.s.	n.s.	1.66225	-0.141184	1.80343		n.s.
P01743;A0A0B4J2H0	P01743;A0A0B4J2H0	IGHV1-46	24.3215	0.326873	0.111096	0.0542052	n.s.	n.s.	n.s.	0.485074	-0.804731	1.2898		n.s.
P01780;A0A0B4J1V1;P01763;P01762	P01780;A0A0B4J1V1;P01763;P01762	IGHV3-7	28.4756	0.870634	0.0250152	0.148461	n.s.	AvM_do	n.s.	-0.0799352	-0.941732	0.861797		changed in MR
P01834	P01834	IGKC	33.443	0.0362739	0.134779	0.00572617	AvC_up	n.s.	MvC_up	0.608861	-0.465721	1.07458	shared	n.s.
P02042;E9PFT6	P02042;E9PFT6	HBD	32.6021	3.7212e-07	0.589903	9.22124e-06	AvC_up	n.s.	MvC_up	2.5938	-0.312472	2.90628	shared	n.s.
P02144;B0QYF8;F2Z2F1;Q8WVH6	P02144;B0QYF8;F2Z2F1;Q8WVH6	MB	37.3575	0.820558	0.112373	0.200599	n.s.	n.s.	n.s.	0.0380488	-0.239789	0.277838		n.s.
P02452;I3L3H7;CON__Q862S4	P02452	COL1A1	32.4466	2.29828e-05	0.0766841	0.100637	AvC_up	n.s.	n.s.	1.68253	0.7385	0.944029		n.s.
P02458;P02458-1	P02458;P02458-1	COL2A1	31.764	0.0432493	0.153039	0.825627	AvC_up	n.s.	n.s.	1.29854	0.983309	0.315236		n.s.
P02461;P02461-2	P02461;P02461-2	COL3A1	30.0188	2.82016e-09	0.000212452	0.0931176	AvC_up	AvM_up	n.s.	2.31135	1.43934	0.872017	AS specific	changed in AS
P02462;A0A3B3ISV3	P02462;A0A3B3ISV3	COL4A1	29.0433	1.25325e-09	3.45807e-05	0.179211	AvC_up	AvM_up	n.s.	1.36882	0.94799	0.420828	AS specific	changed in AS
P02511;E9PR44;E9PJL7;E9PRA8;E9PS12	P02511;E9PR44;E9PJL7;E9PRA8	CRYAB	36.9427	4.83733e-08	0.169907	0.00109266	AvC_do	n.s.	MvC_do	-0.482599	-0.122644	-0.359955	shared	n.s.
P02545;P02545-6;P02545-3;P02545-5;P02545-4;H0YAB0;A0A0C4DGC5	P02545;P02545-6;P02545-3;P02545-5;P02545-4	LMNA	35.192	2.3497e-05	0.811091	0.00274023	AvC_up	n.s.	MvC_up	0.425456	0.0296232	0.395832	shared	n.s.
P02545-2;Q3BDU5	P02545-2;Q3BDU5	LMNA	26.6516	0.0181272	0.908669	0.14238	AvC_up	n.s.	n.s.	1.19202	0.074808	1.11722		n.s.
P02549;P02549-2	P02549;P02549-2	SPTA1	27.0437	0.0391529	0.2193	0.0119604	AvC_up	n.s.	MvC_up	1.83569	-1.18615	3.02183	shared	n.s.
P02647;F8W696	P02647;F8W696	APOA1	35.086	7.33749e-06	0.382118	2.81353e-05	AvC_up	n.s.	MvC_up	1.3376	-0.284716	1.62232	shared	n.s.
P02649;H0Y7L5;E9PEV4;E7ERP7;CON__Q03247	P02649;H0Y7L5;E9PEV4;E7ERP7	APOE	30.8258	2.00279e-06	0.861971	0.000366908	AvC_up	n.s.	MvC_up	1.83466	0.0803344	1.75432	shared	n.s.
P02671;P02671-2;A0A087WUA0;CON__P02672	P02671;P02671-2	FGA	33.0976	0.000662062	0.842321	0.00648461	AvC_up	n.s.	MvC_up	1.05066	-0.0772293	1.12789	shared	n.s.
P02675;D6REL8	P02675;D6REL8	FGB	33.1718	0.0249493	0.218003	0.00785577	AvC_up	n.s.	MvC_up	0.678385	-0.406213	1.0846	shared	n.s.
P02679-2;P02679;C9JEU5;C9JC84	P02679-2;P02679;C9JEU5;C9JC84	FGG	33.1671	0.0164912	0.355524	0.0112069	AvC_up	n.s.	MvC_up	0.724401	-0.312552	1.03695	shared	n.s.
P02730;P02730-2;A0A0A0MS98	P02730;P02730-2;A0A0A0MS98	SLC4A1	29.4184	1.01183e-06	0.4539	9.22124e-06	AvC_up	n.s.	MvC_up	3.81563	-0.64301	4.45864	shared	n.s.
P02741;Q5VVP7;P02741-2;C9JRE9	P02741	CRP	24.7676	7.8493e-06	0.675592	0.0022035	AvC_do	n.s.	MvC_do	-2.36513	-0.261997	-2.10313	shared	n.s.
P02743	P02743	APCS	34.0303	8.07865e-07	0.46821	0.00116528	AvC_up	n.s.	MvC_up	1.92921	0.31321	1.616	shared	n.s.
P02747	P02747	C1QC	27.5127	0.00223419	0.108268	0.000329223	AvC_up	n.s.	MvC_up	1.40336	-0.792583	2.19594	shared	n.s.
P02748	P02748	C9	30.9928	0.0114194	0.180638	0.559625	AvC_up	n.s.	n.s.	0.757597	0.435466	0.32213		n.s.
P02749;J3QRN2;J3QLI0;J3KS17;CON__P17690	P02749	APOH	29.9711	0.000655861	0.529247	0.00189347	AvC_up	n.s.	MvC_up	1.07016	-0.232515	1.30267	shared	n.s.
P02750	P02750	LRG1	29.2187	0.00963012	0.877646	0.0503779	AvC_do	n.s.	n.s.	-1.33299	0.10043	-1.43342		n.s.
P02751;P02751-8;P02751-3;P02751-14;P02751-17;P02751-9;P02751-6;P02751-5;P02751-10;P02751-4;P02751-12;H0Y7Z1;P02751-16;P02751-2;H0Y4K8	P02751;P02751-8;P02751-3;P02751-14;P02751-17;P02751-9;P02751-6;P02751-5;P02751-10;P02751-4;P02751-12	FN1	33.7107	0.288192	0.763259	0.71515	n.s.	n.s.	n.s.	0.33859	0.114646	0.223944		n.s.
Q5VY30;P02753	Q5VY30;P02753	RBP4	27.7463	5.56262e-05	0.568855	0.000344115	AvC_up	n.s.	MvC_up	1.64327	-0.271174	1.91445	shared	n.s.
P02760;S4R471	P02760;S4R471	AMBP	31.2136	0.000126116	0.788281	0.00157704	AvC_up	n.s.	MvC_up	1.05286	-0.0916313	1.1445	shared	n.s.
P02763	P02763	ORM1	32.0143	0.196864	0.60112	0.734914	n.s.	n.s.	n.s.	-0.531387	-0.250302	-0.281085		n.s.
P02765;C9JV77	P02765;C9JV77	AHSG	30.9751	1.93071e-06	0.936189	0.000137765	AvC_up	n.s.	MvC_up	1.62705	-0.032532	1.65958	shared	n.s.
P02766;A0A087WT59;A0A087WV45	P02766;A0A087WT59;A0A087WV45	TTR	32.4847	3.98288e-06	0.952375	0.000277216	AvC_up	n.s.	MvC_up	1.59707	-0.0249102	1.62198	shared	n.s.
P02786;G3V0E5;H7C3V5;F8WBE5	P02786;G3V0E5	TFRC	29.0664	0.00021874	0.636269	0.0218316	AvC_do	n.s.	MvC_do	-0.793337	-0.120975	-0.672362	shared	n.s.
P02787;H7C5E8;C9JVG0;F8WCI6;C9JB55;F8WEK9;CON__Q2HJF0;F8WC57	P02787	TF	35.3018	0.000152073	0.82695	0.00210084	AvC_up	n.s.	MvC_up	1.08167	-0.0782197	1.15989	shared	n.s.
P02790;Q9BS19	P02790;Q9BS19	HPX	33.0687	0.000541665	0.506365	0.00145528	AvC_up	n.s.	MvC_up	0.989693	-0.221263	1.21096	shared	n.s.
P02792	P02792	FTL	28.6113	0.0279981	0.982074	0.141824	AvC_up	n.s.	n.s.	1.05503	-0.0133069	1.06834		n.s.
P02794;G3V192;G3V1D1;E9PRK8;E9PKY7;E9PPQ4;E9PQR3;E9PKM5;E9PK45	P02794;G3V192;G3V1D1	FTH1	31.5955	2.87314e-05	0.00334509	0.530029	AvC_up	AvM_up	n.s.	1.03421	0.75803	0.276184	AS specific	changed in AS
P03886	P03886	MT-ND1	31.5987	0.000425345	0.0867436	0.28556	AvC_do	n.s.	n.s.	-0.994287	-0.514852	-0.479435		n.s.
P03891	P03891	MT-ND2	29.3529	0.232815	0.14225	0.884387	n.s.	n.s.	n.s.	-0.47034	-0.600195	0.129856		n.s.
P03897	P03897	MT-ND3	26.65	0.29234	0.882579	0.631563	n.s.	n.s.	n.s.	0.555855	0.0951978	0.460657		n.s.
P03905	P03905	MT-ND4	31.3865	0.894045	0.188068	0.329149	n.s.	n.s.	n.s.	-0.0320348	0.266571	-0.298605		n.s.
P03915	P03915	MT-ND5	32.3843	0.229196	0.565473	0.793799	n.s.	n.s.	n.s.	-0.212745	-0.116234	-0.0965115		n.s.
P03928	P03928	MT-ATP8	30.2938	0.100433	0.0264063	0.736836	n.s.	AvM_do	n.s.	-0.664954	-0.94062	0.275667		changed in MR
P03950	P03950	ANG	25.8771	1.50679e-05	0.223641	0.02545	AvC_up	n.s.	MvC_up	2.6833	0.805311	1.87799	shared	n.s.
P03951;P03951-2;X6R3B1;H0Y596;D6RB32	P03951;P03951-2	F11	26.3695	0.401319	0.911657	0.573794	n.s.	n.s.	n.s.	0.787305	-0.123166	0.910471		n.s.
P04003;F2Z2V7;A6PVY5;CON__Q28065	P04003	C4BPA	27.1777	0.000419121	0.567175	0.00154002	AvC_up	n.s.	MvC_up	1.76807	-0.337713	2.10578	shared	n.s.
P04004;F5GX75	P04004	VTN	32.9141	0.00170624	0.605566	0.0838519	AvC_up	n.s.	n.s.	0.971951	0.191605	0.780346		n.s.
P04040	P04040	CAT	31.5621	0.00695187	0.0960782	0.000788006	AvC_up	n.s.	MvC_up	0.468307	-0.310126	0.778434	shared	n.s.
P04066	P04066	FUCA1	24.5765	0.278051	0.159341	0.0636028	n.s.	n.s.	n.s.	0.430526	-0.574718	1.00524		n.s.
P04075;J3KPS3;P04075-2;H3BQN4;H3BUH7;H3BR04;H3BMQ8;H3BU78;H3BR68	P04075;J3KPS3;P04075-2;H3BQN4	ALDOA	36.1888	0.220748	0.927358	0.420367	n.s.	n.s.	n.s.	0.126584	-0.0116707	0.138254		n.s.
P04080;A0A1W2PQG6;A0A1W2PS52	P04080;A0A1W2PQG6	CSTB	32.5538	0.000319403	0.0842466	0.265595	AvC_up	n.s.	n.s.	0.46551	0.238081	0.227429		n.s.
P04083;Q5T3N1;Q5T3N0	P04083;Q5T3N1	ANXA1	32.4982	0.392259	0.0757771	0.0469039	n.s.	n.s.	MvC_up	0.156651	-0.324376	0.481027		n.s.
P04114;A8MUN2	P04114	APOB	30.7113	6.06942e-08	0.0322458	5.48778e-09	AvC_up	AvM_do	MvC_up	4.17742	-1.6499	5.82731	shared	changed in MR
P04179;P04179-2;F5H4R2;F5GYZ5;P04179-3;G5E9P6;F5GXZ9	P04179;P04179-2;F5H4R2;F5GYZ5;P04179-3	SOD2	34.7884	0.000271393	0.251567	0.1019	AvC_do	n.s.	n.s.	-0.383513	-0.13126	-0.252254		n.s.
P04181	P04181	OAT	25.3029	0.441179	0.0572806	0.0424675	n.s.	n.s.	MvC_up	0.309211	-0.75121	1.06042		n.s.
P04196	P04196	HRG	30.7824	0.000248437	0.149431	8.10985e-05	AvC_up	n.s.	MvC_up	1.08157	-0.454857	1.53642	shared	n.s.
P04217;M0R009	P04217;M0R009	A1BG	31.4443	0.024691	0.209965	0.00715978	AvC_up	n.s.	MvC_up	0.74029	-0.450361	1.19065	shared	n.s.
P04264	P04264	KRT1	33.2411	0.0213906	0.00134765	0.530029	AvC_up	AvM_up	n.s.	0.947501	1.41625	-0.46875	AS specific	changed in AS
P04271;A8MRB1	P04271	S100B	26.537	0.0493005	0.049617	0.965161	AvC_do	AvM_do	n.s.	-1.07666	-1.14251	0.0658492	AS specific	changed in MR
P04275	P04275	VWF	30.1594	0.776597	0.0564511	0.110935	n.s.	n.s.	n.s.	0.109507	-0.665175	0.774682		n.s.
P04350;M0QY85;M0R278;M0R0X0;M0QY37;M0QX14;M0QZL7;M0QYM7;M0R042;M0R1I1	P04350	TUBB4A	28.5213	0.81784	0.728255	0.735486	n.s.	n.s.	n.s.	-0.0749408	0.115645	-0.190586		n.s.
P04406;E7EUT5;O14556	P04406;E7EUT5	GAPDH	37.3795	0.165852	0.155543	0.967178	n.s.	n.s.	n.s.	-0.122483	-0.131893	0.00941054		n.s.
P04626-5;P04626-4;P04626;J3QLU9;B4DTR1;P04626-6;F5H1T4;J3QL83;J3KRI9;J3QLV2;J3QRX1	P04626-5;P04626-4;P04626;J3QLU9;B4DTR1;P04626-6	ERBB2	24.3123	0.170295	0.237896	0.965161	n.s.	n.s.	n.s.	0.46989	0.429602	0.0402881		n.s.
P04792;F8WE04;C9J3N8	P04792	HSPB1	36.3013	0.078051	0.844681	0.186575	n.s.	n.s.	n.s.	-0.167082	0.0229807	-0.190063		n.s.
P04843;B7Z4L4;F8WF32	P04843;B7Z4L4	RPN1	31.8083	0.0270301	0.182644	0.70283	AvC_do	n.s.	n.s.	-0.171206	-0.112219	-0.0589873		n.s.
P04844-2;P04844;Q5JYR3;H0Y5M1	P04844-2;P04844	RPN2	31.5452	0.0630157	0.185159	0.845828	n.s.	n.s.	n.s.	-0.291937	-0.223999	-0.0679385		n.s.
P04899;P04899-4;P04899-6;P04899-3;P04899-5;P04899-2;P19087;P11488;A8MTJ3;A0A1W2PRE1;A0A1W2PQK2;A0A087WTB6;A0A087WZE5;F8WE78	P04899;P04899-4;P04899-6;P04899-3;P04899-5;P04899-2	GNAI2	31.1328	0.615082	0.0215237	0.22923	n.s.	AvM_do	n.s.	-0.0745438	-0.322776	0.248232		changed in MR
P05023-4;P05023;P05023-3;P05023-2;Q5TC01;Q5TC02;Q5TC05	P05023-4;P05023;P05023-3;P05023-2	ATP1A1	32.0803	0.00047978	0.00269255	0.899119	AvC_do	AvM_do	n.s.	-0.389109	-0.356221	-0.0328878	AS specific	changed in MR
P05026-2;P05026;V9GYR2	P05026-2;P05026;V9GYR2	ATP1B1	31.9275	1.66827e-05	6.51631e-05	0.981772	AvC_do	AvM_do	n.s.	-0.528644	-0.534759	0.0061151	AS specific	changed in MR
P05067;E9PG40;P05067-11;P05067-8;P05067-9;P05067-6;P05067-7;A0A0A0MRG2;P05067-4;P05067-5;P05067-10;P05067-3;H7C0V9;P05067-2;H7C2L2	P05067;E9PG40;P05067-11;P05067-8;P05067-9;P05067-6;P05067-7;A0A0A0MRG2;P05067-4;P05067-5;P05067-10;P05067-3;H7C0V9	APP	24.7836	0.423893	0.530019	0.964307	n.s.	n.s.	n.s.	0.329744	0.282628	0.0471161		n.s.
P05091;S4R3S4	P05091	ALDH2	34.8876	0.00970917	0.002763	0.773198	AvC_do	AvM_do	n.s.	-0.267856	-0.331846	0.0639904	AS specific	changed in MR
P05107;J3KNI6;E7EVZ9;E5RK25	P05107;J3KNI6	ITGB2	24.8493	0.448456	0.725046	0.864607	n.s.	n.s.	n.s.	-0.463652	-0.242934	-0.220717		n.s.
P05109	P05109	S100A8	28.1195	0.00262113	0.502216	0.142287	AvC_do	n.s.	n.s.	-1.81657	-0.472828	-1.34374		n.s.
P05121;P05121-2	P05121;P05121-2	SERPINE1	23.2338	0.000120755	0.237857	0.0722496	AvC_do	n.s.	n.s.	-3.40894	-1.12884	-2.2801		n.s.
P05141	P05141	SLC25A5	31.2921	0.47588	0.00173233	0.00196756	n.s.	AvM_up	MvC_do	-0.107837	0.466356	-0.574193	MR sepcific	changed in AS
P05154;G3V5Q9;G3V2M1;G3V264;G3V482;G3V265;G3V5I3;G3V4B4;G3V3F5	P05154;G3V5Q9	SERPINA5	27.038	2.7414e-05	0.250859	3.62975e-05	AvC_up	n.s.	MvC_up	2.48812	-0.732772	3.22089	shared	n.s.
P05155-2;P05155;P05155-3;E9PGN7;H9KV48;H0YCA1;CON__P50448	P05155-2;P05155;P05155-3;E9PGN7;H9KV48	SERPING1	31.0148	0.00673931	0.00368729	1.78595e-05	AvC_up	AvM_do	MvC_up	0.73595	-0.840796	1.57675	shared	changed in MR
P05165-2;P05165;P05165-3;A0A1B0GU58;A0A1B0GUX9;Q5JTW6;H0Y4B9;H0Y5U0;H0Y798	P05165-2;P05165;P05165-3;A0A1B0GU58;A0A1B0GUX9	PCCA	32.2843	2.72742e-05	0.000175498	0.957275	AvC_do	AvM_do	n.s.	-0.462807	-0.447274	-0.015533	AS specific	changed in MR
P05198;G3V4T5	P05198;G3V4T5	EIF2S1	29.8083	0.132177	0.0806255	0.886579	n.s.	n.s.	n.s.	-0.165191	-0.201004	0.0358135		n.s.
P05204	P05204	HMGN2	22.1943	0.568102	0.709497	0.551047	n.s.	n.s.	n.s.	-0.330651	0.236235	-0.566885		n.s.
P05230;C9JDC5;B5MCF4;P05230-2;C9JUP6	P05230;C9JDC5;B5MCF4;P05230-2	FGF1	25.7036	0.214689	0.224708	0.985859	n.s.	n.s.	n.s.	0.404407	0.417602	-0.013195		n.s.
P05362;K7EKL8;E7ESS4	P05362	ICAM1	26.1322	0.00029154	0.00242075	0.862602	AvC_do	AvM_do	n.s.	-1.33176	-1.18601	-0.145757	AS specific	changed in MR
P05386	P05386	RPLP1	30.0763	0.0189927	0.860215	0.160533	AvC_do	n.s.	n.s.	-1.22417	-0.114824	-1.10934		n.s.
P05387;H0YDD8	P05387	RPLP2	31.2373	0.0153564	0.690899	0.0389618	AvC_do	n.s.	MvC_do	-0.453885	0.0905794	-0.544464	shared	n.s.
P05388;F8VWS0;P05388-2;F8VU65;F8VPE8;G3V210;F8VQY6;F8VRK7;F8VS58;Q8NHW5;F8W1K8	P05388;F8VWS0;P05388-2;F8VU65;F8VPE8;G3V210;F8VQY6;F8VRK7;F8VS58;Q8NHW5	RPLP0	31.2734	0.00259424	0.623848	0.101008	AvC_do	n.s.	n.s.	-0.292999	-0.0572995	-0.235699		n.s.
P05455;E7ERC4;E9PGX9;E9PFL9	P05455	SSB	29.048	0.115291	0.107311	0.963829	n.s.	n.s.	n.s.	-0.239221	-0.258091	0.0188697		n.s.
P05543;CON__Q9TT36	P05543	SERPINA7	25.6027	0.00170624	0.596349	0.00490571	AvC_up	n.s.	MvC_up	1.78473	-0.360629	2.14536	shared	n.s.
P05546	P05546	SERPIND1	30.5511	2.29828e-05	0.35768	6.03668e-05	AvC_up	n.s.	MvC_up	1.61042	-0.385119	1.99554	shared	n.s.
P05556;P05556-2;P05556-4;P05556-3;E7EQW5;C9JPK5;Q5T3E6;E9PLR6;H7C4N8;E7ERX5;C9JJP8;Q5T3E5;E9PQJ2;C9JNE0	P05556;P05556-2;P05556-4;P05556-3	ITGB1	27.8376	0.996048	0.221078	0.444523	n.s.	n.s.	n.s.	0.00210302	0.488553	-0.48645		n.s.
P05556-5;H7C4K3	P05556-5	ITGB1	31.885	0.0786959	0.584707	0.5335	n.s.	n.s.	n.s.	-0.196937	-0.0719035	-0.125033		n.s.
P05783;F8VZY9;CON__H-INV:HIT000015463	P05783;F8VZY9	KRT18	27.4775	0.0311931	0.965049	0.165412	AvC_up	n.s.	n.s.	2.05038	0.0524821	1.9979		n.s.
P05997;A0A087WYX9;A0A3B3IRH9	P05997;A0A087WYX9	COL5A2	27.0859	0.0104471	0.12306	0.636945	AvC_up	n.s.	n.s.	1.01192	0.655927	0.355996		n.s.
P06132;A0A1B0GVN9;A0A1B0GVZ4;H0Y5R6;Q5T446	P06132;A0A1B0GVN9;A0A1B0GVZ4;H0Y5R6;Q5T446	UROD	25.6669	0.0689427	0.764693	0.143126	n.s.	n.s.	n.s.	-0.745355	0.151793	-0.897148		n.s.
P06213-2;P06213;M0R3E6	P06213-2;P06213	INSR	25.1822	0.816478	0.289561	0.641793	n.s.	n.s.	n.s.	0.129821	0.545351	-0.41553		n.s.
P06312	P06312	IGKV4-1	26.5517	0.0529873	0.633845	0.0832104	n.s.	n.s.	n.s.	1.19278	-0.350729	1.54351		n.s.
P06331	P06331	IGHV4-34	27.4083	0.0422574	0.952375	0.162071	AvC_up	n.s.	n.s.	1.10964	-0.0408249	1.15047		n.s.
P06396	P06396	GSN	34.9376	1.24786e-05	0.536125	0.00528564	AvC_up	n.s.	MvC_up	0.46857	0.0765764	0.391993	shared	n.s.
P06396-2;Q5T0I0	P06396-2	GSN	29.2627	0.212313	0.860625	0.368478	n.s.	n.s.	n.s.	0.454288	-0.0773514	0.531639		n.s.
P06401-2;P06401-5;P06401;P06401-4;P06401-3;A0A087WXR4;Q8NG45;Q8NG44;Q8NG42	P06401-2;P06401-5;P06401;P06401-4;P06401-3	PGR	26.9349	0.470225	0.00412898	0.00451343	n.s.	AvM_up	MvC_do	-0.66045	2.5599	-3.22035	MR sepcific	changed in AS
P06576;H0YH81	P06576;H0YH81	ATP5F1B	38.5649	1.4305e-06	0.00609711	0.162495	AvC_do	AvM_do	n.s.	-0.585333	-0.338658	-0.246675	AS specific	changed in MR
P06681;A0A0G2JL69;P06681-3;B4DQI1;A0A0G2JIE7;H0Y3H6;P06681-2;E9PDZ0;A0A0G2JK28;Q8N6L6;H0Y868	P06681;A0A0G2JL69;P06681-3;B4DQI1;A0A0G2JIE7;H0Y3H6;P06681-2;E9PDZ0;A0A0G2JK28	C2	26.4956	0.0144445	0.160163	0.00304475	AvC_up	n.s.	MvC_up	1.0334	-0.639564	1.67297	shared	n.s.
P06702	P06702	S100A9	29.9127	0.0321477	0.69818	0.296931	AvC_do	n.s.	n.s.	-1.19882	-0.26317	-0.935651		n.s.
P06703;R4GN98	P06703;R4GN98	S100A6	32.2917	0.025433	0.17303	0.704169	AvC_up	n.s.	n.s.	0.592747	0.391609	0.201138		n.s.
P06727	P06727	APOA4	31.0691	1.19755e-07	0.777268	9.22124e-06	AvC_up	n.s.	MvC_up	2.49352	-0.157056	2.65058	shared	n.s.
P06730;P06730-2;D6RBW1;P06730-3;H0Y8J7;D6RFJ3;H0Y8X3	P06730;P06730-2;D6RBW1;P06730-3;H0Y8J7	EIF4E	27.3399	0.0902314	0.304349	0.788118	n.s.	n.s.	n.s.	-0.361581	-0.239159	-0.122422		n.s.
P06732	P06732	CKM	37.6545	0.00719076	0.0729534	0.701731	AvC_do	n.s.	n.s.	-0.285613	-0.204308	-0.0813053		n.s.
P06733;K7EM90;A0A2R8YEM5;A0A2R8Y879;K7ERS8;A0A2R8Y6I8	P06733	ENO1	34.9617	0.100899	0.185583	0.922843	n.s.	n.s.	n.s.	-0.137658	-0.118861	-0.0187971		n.s.
P06737-2;P06737;E9PK47	P06737-2;P06737;E9PK47	PYGL	25.61	0.483809	0.160219	0.129571	n.s.	n.s.	n.s.	0.401219	-0.796801	1.19802		n.s.
P06748-2;P06748;P06748-3;E5RI98;E5RGW4	P06748-2;P06748;P06748-3	NPM1	31.6036	0.259838	0.834777	0.395054	n.s.	n.s.	n.s.	-0.144357	0.0323921	-0.176749		n.s.
P06753	P06753	TPM3	35.0914	1.52041e-05	0.303254	0.0161859	AvC_up	n.s.	MvC_up	1.1541	0.297322	0.85678	shared	n.s.
P06753-5;P06753-7	P06753-5;P06753-7	TPM3	29.1976	0.90348	0.0252493	0.0810362	n.s.	AvM_do	n.s.	0.0271147	-0.408805	0.43592		changed in MR
P06756-3;P06756;P06756-2;H7BZG1	P06756-3;P06756;P06756-2	ITGAV	28.9198	0.043107	0.0259786	0.886579	AvC_do	AvM_do	n.s.	-0.533298	-0.620697	0.0873996	AS specific	changed in MR
P06858;E7EW14;E5RJI0;E5RHN7	P06858	LPL	29.1723	0.121772	0.680867	0.173405	n.s.	n.s.	n.s.	-0.7914	0.251187	-1.04259		n.s.
Q16778;P06899;P33778;P23527	Q16778;P06899;P33778;P23527	HIST2H2BE	27.104	0.0371014	0.9655	0.184771	AvC_do	n.s.	n.s.	-2.29665	-0.0581947	-2.23846		n.s.
P07093-2;P07093-3	P07093-2;P07093-3	SERPINE2	26.9061	0.000862252	0.00143082	0.9747	AvC_up	AvM_up	n.s.	2.28381	2.33923	-0.0554153	AS specific	changed in AS
P07099;B1AQP9;B1AQP8	P07099	EPHX1	30.9648	0.00383567	0.0145811	0.900138	AvC_do	AvM_do	n.s.	-0.353894	-0.318355	-0.035539	AS specific	changed in MR
P07108;P07108-6	P07108	DBI	33.5223	0.720322	0.675592	0.969822	n.s.	n.s.	n.s.	0.0855881	0.105049	-0.0194608		n.s.
P07195;A0A3B3IS95;A8MW50;C9J7H8	P07195;A0A3B3IS95;A8MW50;C9J7H8	LDHB	36.561	0.132966	0.246409	0.907448	n.s.	n.s.	n.s.	-0.154702	-0.12789	-0.0268113		n.s.
P07237;H7BZ94;H0Y3Z3;I3L398;I3L312;I3L4M2;I3NI03;I3L3U6;I3L0S0;I3L3P5;I3L514;I3L1Y5	P07237;H7BZ94;H0Y3Z3	P4HB	33.534	0.760121	0.441672	0.486302	n.s.	n.s.	n.s.	-0.0318063	0.0781826	-0.109989		n.s.
P07305;P07305-2	P07305;P07305-2	H1F0	31.159	0.206218	0.968406	0.480253	n.s.	n.s.	n.s.	0.268858	0.0101654	0.258692		n.s.
P07355;P07355-2;H0YN42;H0YMD0;H0YMU9;H0YM50;A6NMY6;H0YNP5;H0YKS4;H0YN28;H0YL33;H0YMM1;H0YKZ7;H0YMT9;H0YKX9;H0YKL9;H0YMW4;H0YKV8;H0YNA0;H0YMD9;H0YN52;H0YNB8;H0YKN4;H0YLE2	P07355;P07355-2;H0YN42;H0YMD0;H0YMU9;H0YM50;A6NMY6;H0YNP5;H0YKS4	ANXA2	34.662	0.121198	0.132626	0.988047	n.s.	n.s.	n.s.	-0.198114	-0.202515	0.00440188		n.s.
P07357	P07357	C8A	27.6994	0.00101077	0.752246	0.0399648	AvC_up	n.s.	MvC_up	1.50585	0.180655	1.32519	shared	n.s.
P07358	P07358	C8B	28.4854	0.00859155	0.998608	0.0686594	AvC_up	n.s.	n.s.	1.44072	0.00109457	1.43963		n.s.
P07360;Q5SQ08;A0A3B3ITK5	P07360;Q5SQ08	C8G	28.1283	0.000702872	0.976396	0.0138048	AvC_up	n.s.	MvC_up	1.94734	0.0207411	1.9266	shared	n.s.
P07384;E9PRM1;E9PQB3;E9PLX0;E9PJJ3;E9PLC9;E9PMC6;E9PJA6;E9PSA6;E9PL37;E9PIA9	P07384	CAPN1	31.7243	0.793423	0.00787796	0.0238168	n.s.	AvM_do	MvC_up	0.029156	-0.262073	0.291229	MR sepcific	changed in MR
Q5JP53;P07437;Q5ST81;A6NNZ2	Q5JP53;P07437;Q5ST81	TUBB	32.2414	0.440605	0.935333	0.618441	n.s.	n.s.	n.s.	0.152038	-0.0185516	0.170589		n.s.
P07451;E5RHI4	P07451	CA3	29.0514	1.63609e-08	0.114855	0.000959697	AvC_up	n.s.	MvC_up	5.36047	1.48778	3.87269	shared	n.s.
P07585;P07585-2;P07585-3;F8VXZ8;F8VUF6;F8VWU0;F8VNV6;P07585-4;F8VX58;H0YIH3;H0YI87;F8VNW0;F8VU58;F8VSI3;P07585-5	P07585;P07585-2	DCN	33.5569	0.00118371	0.839035	0.0329085	AvC_up	n.s.	MvC_up	0.825257	0.0648278	0.760429	shared	n.s.
P07602;C9JIZ6;P07602-2;P07602-3;Q5BJH1;A0A0J9YXB8	P07602;C9JIZ6;P07602-2;P07602-3;Q5BJH1	PSAP	33.1434	0.0314911	0.209139	0.690422	AvC_up	n.s.	n.s.	0.402371	0.255444	0.146928		n.s.
P07686;Q5URX0;H0YA83;H0Y9B6;H0Y9M3;D6REQ8	P07686;Q5URX0;H0YA83	HEXB	29.0729	0.771534	0.804125	0.754096	n.s.	n.s.	n.s.	-0.0989801	0.090579	-0.189559		n.s.
P07711;Q5T8F0;Q5NE16;P43235;O60911	P07711	CTSL	25.723	0.16308	0.00275734	0.265595	n.s.	AvM_do	n.s.	-0.749303	-1.67577	0.926465		changed in MR
P07737;K7EJ44;CON__P02584;I3L3D5	P07737;K7EJ44	PFN1	33.1666	0.0196078	0.0231573	0.973811	AvC_up	AvM_up	n.s.	0.268733	0.278276	-0.0095434	AS specific	changed in AS
P07738;C9JH23	P07738	BPGM	25.5018	0.00425799	0.134585	0.000817321	AvC_up	n.s.	MvC_up	1.71859	-0.969865	2.68845	shared	n.s.
P07741;H3BQZ9;P07741-2;H3BQF1;H3BQB1;H3BSW3	P07741;H3BQZ9;P07741-2;H3BQF1;H3BQB1	APRT	28.3563	0.332471	0.697415	0.372858	n.s.	n.s.	n.s.	-0.193448	0.0895534	-0.283001		n.s.
P07814;V9GYZ6;V9GZ76	P07814;V9GYZ6	EPRS	30.7629	0.00565379	0.00539551	0.937377	AvC_do	AvM_do	n.s.	-0.226025	-0.241836	0.0158104	AS specific	changed in MR
P07858;E9PKQ7;E9PNL5;E9PHZ5;E9PLY3;E9PSG5;E9PQM1;E9PR54;E9PJ67;E9PCB3;R4GMQ5;E9PS78	P07858	CTSB	31.1426	0.246272	0.453365	0.176702	n.s.	n.s.	n.s.	-0.265033	0.189483	-0.454517		n.s.
P07900;P07900-2;G3V2J8;Q58FG0	P07900;P07900-2	HSP90AA1	33.5509	0.000482451	0.541627	0.049614	AvC_do	n.s.	MvC_do	-0.377152	-0.0772599	-0.299892	shared	n.s.
P07902;P07902-2	P07902;P07902-2	GALT	28.0632	0.219189	0.0802531	0.779804	n.s.	n.s.	n.s.	-0.521988	-0.768959	0.24697		n.s.
P07919;A0A096LP55;A0A087X2B9;A0A087WTF2	P07919;A0A096LP55	UQCRH	30.2923	0.190915	0.521421	0.165669	n.s.	n.s.	n.s.	-0.468644	0.262186	-0.73083		n.s.
P07951;Q5TCU8;U3KQK2;A0A2R8Y6A3	P07951;Q5TCU8	TPM2	34.3372	0.223476	0.0629233	0.723383	n.s.	n.s.	n.s.	-0.156818	-0.247028	0.0902095		n.s.
P07954-2;P07954	P07954-2;P07954	FH	35.4755	0.00139207	0.19077	0.263522	AvC_do	n.s.	n.s.	-0.264504	-0.117597	-0.146907		n.s.
P08133;P08133-2;E7EMC6;E5RK63;E5RJF5;E5RFF0;E5RI05;E5RJR0;E5RIU8	P08133;P08133-2;E7EMC6	ANXA6	34.9238	0.0736792	0.316486	0.0381507	n.s.	n.s.	MvC_up	0.157523	-0.0967745	0.254297		n.s.
P08185;G3V350;G3V4V7	P08185;G3V350	SERPINA6	27.4112	0.324364	0.783262	0.737085	n.s.	n.s.	n.s.	0.52242	0.174278	0.348141		n.s.
P08237;P08237-2;F8VNX2;F8VZQ1;F8VX13;F8VSL1;F8VP00;F8VW30;F8W1J8;F8VSF7;F8VZ53;F8VSF5	P08237;P08237-2	PFKM	35.0945	0.0460603	0.330033	0.628912	AvC_do	n.s.	n.s.	-0.251462	-0.13607	-0.115392		n.s.
P08238;Q58FF7	P08238	HSP90AB1	34.9093	1.5512e-05	0.390631	0.0110071	AvC_do	n.s.	MvC_do	-0.303192	-0.0666236	-0.236568	shared	n.s.
P08240;P08240-2	P08240;P08240-2	SRPRA	26.7813	0.00010268	0.00549894	0.597075	AvC_do	AvM_do	n.s.	-1.18015	-0.883768	-0.296382	AS specific	changed in MR
P08294;M0R1V4	P08294	SOD3	29.8927	0.000329038	0.49247	0.0477462	AvC_up	n.s.	MvC_up	1.07367	0.238073	0.8356	shared	n.s.
P08311	P08311	CTSG	27.0914	0.0010023	0.000565833	0.851005	AvC_do	AvM_do	n.s.	-1.95595	-2.20936	0.253416	AS specific	changed in MR
P08493;P08493-2	P08493;P08493-2	MGP	26.5482	0.00018838	0.0104025	0.569318	AvC_up	AvM_up	n.s.	1.77007	1.27474	0.495324	AS specific	changed in AS
P08559;P08559-3;P08559-2;P08559-4;Q5JPU0;Q5JPT9;Q5JPU1;Q5JPU3;Q5JPU2	P08559;P08559-3;P08559-2;P08559-4	PDHA1	34.8035	0.204893	0.131861	0.0378369	n.s.	n.s.	MvC_do	-0.131369	0.162353	-0.293722		n.s.
P08571;D6RFL4;E7EVL5	P08571;D6RFL4	CD14	27.9264	0.00416511	0.0867808	0.579148	AvC_do	n.s.	n.s.	-1.0604	-0.679383	-0.38102		n.s.
P08572;A0A3B3IS47;A0A3B3ITQ8;A0A3B3IS04;A0A3B3IRV2;A2A352;A0A3B3IT80;A0A087WY39	P08572	COL4A2	31.717	7.10269e-05	0.784835	0.00613903	AvC_up	n.s.	MvC_up	0.657125	0.0560385	0.601087	shared	n.s.
P08574	P08574	CYC1	33.9976	0.000208248	0.201013	0.11498	AvC_do	n.s.	n.s.	-0.473054	-0.175786	-0.297268		n.s.
P08579	P08579	SNRPB2	22.9103	0.941735	0.146322	0.38339	n.s.	n.s.	n.s.	0.0365167	0.602313	-0.565797		n.s.
P08590;E9PGV7	P08590	MYL3	38.3299	0.934138	0.0250885	0.0878083	n.s.	AvM_up	n.s.	-0.0274734	0.610979	-0.638452		changed in AS
P08603;P08603-2	P08603	CFH	30.7557	3.4443e-06	0.452645	2.41139e-05	AvC_up	n.s.	MvC_up	1.29495	-0.232212	1.52716	shared	n.s.
P08621;P08621-2;P08621-3;M0QYR1;P08621-4;M0QX04	P08621;P08621-2;P08621-3	SNRNP70	26.3786	0.0648845	0.125635	0.925631	n.s.	n.s.	n.s.	-0.567821	-0.501147	-0.0666744		n.s.
P08648;H0YIV7;H0YHL9	P08648	ITGA5	27.9306	0.000726557	0.0461613	0.484095	AvC_do	AvM_do	n.s.	-0.98808	-0.623329	-0.364751	AS specific	changed in MR
P08670;B0YJC4;B0YJC5;A0A1B0GTT5;A0A1B0GVG8;B4DIR1;K7EKH9	P08670;B0YJC4;B0YJC5	VIM	35.9165	0.00259376	0.808663	0.0150842	AvC_up	n.s.	MvC_up	0.545043	-0.055342	0.600385	shared	n.s.
P08697;P08697-2;A0A0G2JPA8;C9JMH6;A0A0J9YY65	P08697;P08697-2;A0A0G2JPA8;C9JMH6;A0A0J9YY65	SERPINF2	30.5545	0.0187481	0.921068	0.0896716	AvC_up	n.s.	n.s.	0.731502	-0.0394724	0.770974		n.s.
P08754	P08754	GNAI3	24.5965	0.221511	0.145759	0.897007	n.s.	n.s.	n.s.	-0.572698	-0.709387	0.136689		n.s.
P08758;D6RBE9;E9PHT9;D6RCN3	P08758;D6RBE9;E9PHT9	ANXA5	34.1258	0.140396	0.178616	0.984258	n.s.	n.s.	n.s.	0.205428	0.19903	0.00639763		n.s.
P09012;M0R268;M0R221;M0R2B8;M0QXK2;M0QZG7;M0R0G9	P09012;M0R268;M0R221;M0R2B8;M0QXK2;M0QZG7	SNRPA	25.8417	0.199437	0.186872	0.96717	n.s.	n.s.	n.s.	-0.579142	-0.627593	0.0484509		n.s.
P09104;P09104-2;F5H0C8;F5H1C3;U3KQP4	P09104;P09104-2;F5H0C8	ENO2	30.1801	0.0138643	0.536181	0.277026	AvC_up	n.s.	n.s.	0.549224	0.163007	0.386216		n.s.
P09110;C9JDE9;H7C131;P09110-2;H0Y4D4;B4DVF4;F2Z3P7	P09110;C9JDE9;H7C131;P09110-2;H0Y4D4	ACAA1	30.6121	0.000778926	0.00349989	0.909168	AvC_do	AvM_do	n.s.	-0.585683	-0.540627	-0.0450565	AS specific	changed in MR
P09211;A8MX94;A0A087X2E9;A0A087X243;A0A2R8Y5E5	P09211;A8MX94	GSTP1	33.4801	0.100506	0.856177	0.394559	n.s.	n.s.	n.s.	-0.238589	-0.0325248	-0.206064		n.s.
P09382;F8WEI7	P09382	LGALS1	33.4205	0.720601	0.0910712	0.416651	n.s.	n.s.	n.s.	0.075118	0.326998	-0.25188		n.s.
P09417;P09417-2;B7Z415;D6RGG7;H0Y8F7;D6RHJ7	P09417;P09417-2	QDPR	31.6062	0.0228708	0.388718	0.458453	AvC_do	n.s.	n.s.	-0.252177	-0.107884	-0.144294		n.s.
Q5T7C4;P09429;B2RPK0	Q5T7C4;P09429;B2RPK0	HMGB1	31.2772	0.8982	0.0532852	0.223905	n.s.	n.s.	n.s.	-0.0243023	-0.304605	0.280303		n.s.
P09455;A0A0A0MTB9;H0YAK8;A0A0A0MQT0;P09455-2;P09455-3	P09455;A0A0A0MTB9;H0YAK8;A0A0A0MQT0;P09455-2;P09455-3	RBP1	28.2657	0.0321477	0.0149478	0.844684	AvC_do	AvM_do	n.s.	-1.0989	-1.32433	0.225423	AS specific	changed in MR
P09471-2;P09471;H3BTM2;A0A1W2PP87;A0A1W2PRJ7;A0A1W2PS82;A0A1W2PP38	P09471-2;P09471	GNAO1	27.9038	0.320067	0.107193	0.0502638	n.s.	n.s.	n.s.	0.480442	-0.795755	1.2762		n.s.
P09493-10;P09493-4;H0YKX5	P09493-10;P09493-4;H0YKX5	TPM1	27.4226	0.00375175	0.00705988	0.98743	AvC_up	AvM_up	n.s.	1.26058	1.24377	0.0168023	AS specific	changed in AS
P09493-6	P09493-6	TPM1	30.0483	0.0612574	0.188068	0.837021	n.s.	n.s.	n.s.	1.26624	0.957233	0.309006		n.s.
P09496-2;P09496-4;P09496-3;P09496;F8WF69;P09496-5;C9J8P9	P09496-2;P09496-4;P09496-3;P09496;F8WF69;P09496-5	CLTA	26.034	0.0356377	0.0626603	0.96511	AvC_up	n.s.	n.s.	0.956534	0.901139	0.0553949		n.s.
P09497-2;P09497;D6RJD1;H0Y9Q6	P09497-2;P09497	CLTB	29.8595	6.44169e-07	0.00142624	0.257301	AvC_up	AvM_up	n.s.	0.875508	0.573863	0.301645	AS specific	changed in AS
P09525;Q6P452;B4E1S2	P09525;Q6P452	ANXA4	30.5514	1.35908e-05	0.948272	0.00109049	AvC_up	n.s.	MvC_up	0.719661	0.0131548	0.706506	shared	n.s.
P09543;P09543-2;K7ERC4;C9K0L8;K7ERZ0;K7EN66	P09543;P09543-2	CNP	28.4372	0.817965	0.0867436	0.1649	n.s.	n.s.	n.s.	0.0522743	-0.348143	0.400417		n.s.
P09619;P09619-2;E5RJ14;E5RH16;E5RII0	P09619	PDGFRB	30.8034	0.504277	0.00389563	0.00471741	n.s.	AvM_up	MvC_do	-0.336143	1.41172	-1.74787	MR sepcific	changed in AS
P09622;E9PEX6;P09622-3;F8WDM5;A0A1W2PR83;F2Z2E3;F8WDY5	P09622;E9PEX6;P09622-3	DLD	35.0525	0.0482448	0.382093	0.0337852	AvC_do	n.s.	MvC_do	-0.205194	0.10165	-0.306844	shared	n.s.
P09651;F8W6I7;P09651-2;P09651-3;F8VZ49;A0A2R8Y4L2;F8VTQ5;H0YH80;F8VYN5;F8W646	P09651;F8W6I7;P09651-2;P09651-3;F8VZ49;A0A2R8Y4L2;F8VTQ5;H0YH80	HNRNPA1	30.8255	0.0993729	0.24524	0.0362266	n.s.	n.s.	MvC_do	-0.206597	0.156855	-0.363452		n.s.
P09661;H0YKK0;H0YMA0;H0YLR3	P09661;H0YKK0	SNRPA1	26.7708	0.453014	0.112347	0.640158	n.s.	n.s.	n.s.	-0.229949	-0.482411	0.252462		n.s.
P09669	P09669	COX6C	33.5203	0.195105	0.0030441	0.247237	n.s.	AvM_up	n.s.	0.188634	0.446351	-0.257717		changed in AS
P09874;Q5VX84;Q5VX85	P09874	PARP1	30.5431	0.0114194	0.0053636	0.851005	AvC_do	AvM_do	n.s.	-0.29163	-0.340693	0.0490634	AS specific	changed in MR
P09914;P09914-2;Q5T764	P09914;P09914-2	IFIT1	24.7032	0.447823	0.406708	0.267013	n.s.	n.s.	n.s.	0.467404	-0.533496	1.0009		n.s.
P09936;D6RE83;D6R956;D6R974;D6RF53	P09936;D6RE83;D6R956;D6R974	UCHL1	29.7489	0.00029154	0.0894389	4.43527e-05	AvC_up	n.s.	MvC_up	1.76069	-0.877688	2.63837	shared	n.s.
P09960;P09960-4;P09960-2;P09960-3;B4DEH5	P09960;P09960-4;P09960-2;P09960-3	LTA4H	31.6691	0.0429455	0.0448435	0.96717	AvC_do	AvM_do	n.s.	-0.230761	-0.243198	0.0124373	AS specific	changed in MR
P09972;A8MVZ9;J3KSV6;J3QKP5;C9J8F3;J3QKK1;K7EKH5	P09972;A8MVZ9	ALDOC	33.874	0.635124	0.214119	0.226354	n.s.	n.s.	n.s.	0.0628667	-0.158759	0.221626		n.s.
P0C0L4	P0C0L4	C4A	27.4163	0.753383	0.129433	0.194282	n.s.	n.s.	n.s.	0.194731	-0.857648	1.05238		n.s.
P0C0L5;F5GXS0;A0A3B3ISA6	P0C0L5;F5GXS0;A0A3B3ISA6	C4B	33.0469	0.00216335	0.405363	0.00272776	AvC_up	n.s.	MvC_up	0.910064	-0.279632	1.1897	shared	n.s.
P0C0S5;Q71UI9;C9J0D1;Q71UI9-4;Q71UI9-2	P0C0S5;Q71UI9;C9J0D1;Q71UI9-4;Q71UI9-2	H2AFZ	30.8288	0.00234875	0.000504569	0.730173	AvC_do	AvM_do	n.s.	-0.768843	-0.948475	0.179632	AS specific	changed in MR
P0C870;B5MC20;C9K0I3;H0Y9G9	P0C870;B5MC20	JMJD7	25.9107	0.0190835	0.579551	0.0315957	AvC_up	n.s.	MvC_up	1.10627	-0.310736	1.417	shared	n.s.
P0CG30;Q6ICJ4;A0A087WY67;P0CG29	P0CG30;Q6ICJ4;A0A087WY67;P0CG29	GSTT2B	25.838	0.799042	0.0376879	0.219172	n.s.	AvM_do	n.s.	-0.208844	-1.52698	1.31814		changed in MR
P0DJ07;A0A0A0MSK2;M0QZ55;M0QY33;M0QYU6;M0R022;M0R2T5	P0DJ07;A0A0A0MSK2;M0QZ55;M0QY33;M0QYU6;M0R022	PET100	27.6385	0.0208144	0.823662	0.0727925	AvC_do	n.s.	n.s.	-1.19085	0.144741	-1.33559		n.s.
P0DJI9	P0DJI9	SAA2	25.2405	4.95029e-09	0.522342	2.33235e-07	AvC_do	n.s.	MvC_do	-4.58109	0.539045	-5.12013	shared	n.s.
P0DN76;Q01081;Q01081-2;Q01081-4;Q8WU68-3;Q8WU68;K7EJH3;A0A1B0GW87;K7EJM7;M0QYK5;M0R2N4;Q01081-3;Q8WU68-2	P0DN76;Q01081;Q01081-2;Q01081-4	U2AF1L5	27.373	0.0211725	0.134585	0.735486	AvC_do	n.s.	n.s.	-0.690046	-0.481645	-0.208401		n.s.
P0DOY3;P0DOY2;P0CF74	P0DOY3;P0DOY2	IGLC3	30.331	0.00648493	0.224708	0.00260356	AvC_up	n.s.	MvC_up	0.995419	-0.485751	1.48117	shared	n.s.
P10109	P10109	FDX1	27.2311	0.162308	0.0317521	0.659046	n.s.	AvM_up	n.s.	0.547439	0.874079	-0.32664		changed in AS
P10155;P10155-3;P10155-5;P10155-4;P10155-2;H0Y9N5;G5E9R9;D6RE09;D6RDN1	P10155;P10155-3;P10155-5;P10155-4	TROVE2	29.2064	0.190022	0.134585	0.909007	n.s.	n.s.	n.s.	-0.339195	-0.404386	0.0651917		n.s.
U3KQK5;P10176	U3KQK5;P10176	COX8A	26.151	0.0589788	0.0579902	0.966355	n.s.	n.s.	n.s.	0.834034	0.884935	-0.0509007		n.s.
P10253;I3L3L3;I3L0S5;I3L2V9	P10253	GAA	29.961	0.00457807	0.444406	0.207637	AvC_do	n.s.	n.s.	-0.401113	-0.124387	-0.276726		n.s.
P10301	P10301	RRAS	31.2781	0.387177	0.39843	0.988651	n.s.	n.s.	n.s.	0.120338	0.124114	-0.00377571		n.s.
P10316	P10316	HLA-A	27.3532	0.00667112	0.346475	0.307552	AvC_do	n.s.	n.s.	-1.21541	-0.473033	-0.74238		n.s.
P10398;Q96II5;P10398-2	P10398;Q96II5	ARAF	24.3697	0.868895	0.425217	0.541027	n.s.	n.s.	n.s.	-0.0786652	0.347257	-0.425923		n.s.
P10412;P22492	P10412	HIST1H1E	26.5322	0.533303	0.9655	0.765627	n.s.	n.s.	n.s.	0.487139	0.0380761	0.449063		n.s.
P10515;E9PEJ4;H0YDD4	P10515;E9PEJ4;H0YDD4	DLAT	34.7714	0.915773	0.297821	0.584941	n.s.	n.s.	n.s.	0.0163199	0.134335	-0.118015		n.s.
P10599;P10599-2	P10599;P10599-2	TXN	31.5646	0.551462	0.57967	0.9997	n.s.	n.s.	n.s.	-0.119265	-0.119073	-0.000191969		n.s.
P10606	P10606	COX5B	34.4887	0.515188	0.594519	0.975222	n.s.	n.s.	n.s.	-0.0903137	-0.0803819	-0.00993177		n.s.
X6R5C5;X6R8A1;P10619-2;P10619;Q5JZH0;U3KQ41;U3KQU6	X6R5C5;X6R8A1;P10619-2;P10619	CTSA	25.4442	0.208062	0.928803	0.406041	n.s.	n.s.	n.s.	-0.562452	0.0496167	-0.612068		n.s.
P10636;A0A0G2JPD5;P10636-9;A0A0G2JMX7	P10636;A0A0G2JPD5;P10636-9;A0A0G2JMX7	MAPT	29.3129	0.0465751	0.538546	0.0562842	AvC_do	n.s.	n.s.	-0.987638	0.358673	-1.34631		n.s.
P10643	P10643	C7	28.2392	0.769194	0.200362	0.274078	n.s.	n.s.	n.s.	0.181411	-0.732484	0.913895		n.s.
P10644;P10644-2;K7EPB2;K7EM13;K7EKR1	P10644;P10644-2;K7EPB2	PRKAR1A	32.7526	0.281864	0.112472	0.789559	n.s.	n.s.	n.s.	-0.128077	-0.193677	0.0656003		n.s.
P10768;X6RA14;H7BZT7;U3KQT1	P10768;X6RA14;H7BZT7	ESD	31.7005	0.0385322	0.0176684	0.842045	AvC_up	AvM_up	n.s.	0.203259	0.246948	-0.0436886	AS specific	changed in AS
P10809;E7EXB4;E7ESH4;P10809-2;C9JL25;C9JL19;C9JCQ4;C9J0S9	P10809	HSPD1	35.3475	2.29156e-05	0.00253225	0.550286	AvC_do	AvM_do	n.s.	-0.317904	-0.237675	-0.0802294	AS specific	changed in MR
P10909-4;P10909;P10909-5;P10909-2;H0YC35;H0YLK8;P10909-3;E7ERK6;E7ETB4;H0YAS8;E5RJZ5;E5RG36;E5RGB0;E5RH61	P10909-4;P10909;P10909-5;P10909-2;H0YC35;H0YLK8;P10909-3	CLU	32.4877	0.00112349	0.192719	0.242314	AvC_up	n.s.	n.s.	1.00763	0.437888	0.569745		n.s.
P10915;D6RBS1;D6RC59;D6RAK7;D6RBX9;D6RG04	P10915;D6RBS1	HAPLN1	27.5133	3.49777e-11	0.000168761	0.0121593	AvC_up	AvM_up	MvC_up	4.82256	2.64737	2.17518	shared	changed in AS
P10916;G3V1V8	P10916;G3V1V8	MYL2	38.1269	0.0907756	0.902018	0.231691	n.s.	n.s.	n.s.	-0.182471	0.0170026	-0.199474		n.s.
P11021	P11021	HSPA5	34.1625	0.0395291	0.457969	0.496937	AvC_do	n.s.	n.s.	-0.220801	-0.0912114	-0.12959		n.s.
P11047;R4GNC7	P11047	LAMC1	34.6044	0.00325812	0.000120069	0.462847	AvC_do	AvM_do	n.s.	-0.243086	-0.349917	0.10683	AS specific	changed in MR
P11055	P11055	MYH3	34.8216	0.00224663	0.374684	0.178889	AvC_up	n.s.	n.s.	0.43406	0.141495	0.292565		n.s.
P11142;E9PKE3;E9PNE6;P11142-2;E9PLF4;E9PQQ4;E9PQK7;E9PPY6;E9PN25;E9PI65	P11142;E9PKE3;E9PNE6;P11142-2	HSPA8	35.8138	1.00827e-05	0.0186408	0.185946	AvC_do	AvM_do	n.s.	-0.346278	-0.191166	-0.155112	AS specific	changed in MR
P11166;A6NL68;A0A0D9SG74;A0A0D9SFK9	P11166	SLC2A1	26.7649	0.0025419	0.123044	0.000424267	AvC_up	n.s.	MvC_up	1.46321	-0.804917	2.26812	shared	n.s.
P11171;P11171-2;A0A2R8YD30;P11171-3;Q4VB86;P11171-4	P11171;P11171-2;A0A2R8YD30;P11171-3;Q4VB86;P11171-4	EPB41	26.0367	0.0279981	0.18986	0.00703107	AvC_up	n.s.	MvC_up	1.21067	-0.785116	1.99578	shared	n.s.
P11177;P11177-3;P11177-2;C9J634	P11177;P11177-3;P11177-2;C9J634	PDHB	35.3419	0.0523995	0.930713	0.241741	n.s.	n.s.	n.s.	-0.254142	-0.0143035	-0.239838		n.s.
P11182;Q5VVL7	P11182;Q5VVL7	DBT	32.934	0.132457	0.254167	0.901054	n.s.	n.s.	n.s.	-0.141958	-0.115456	-0.0265014		n.s.
P11216;H0Y4Z6	P11216	PYGB	35.7649	0.0167242	0.464963	0.349137	AvC_up	n.s.	n.s.	0.291474	0.1025	0.188975		n.s.
P11217;P11217-2	P11217;P11217-2	PYGM	33.6347	0.325202	0.910522	0.64169	n.s.	n.s.	n.s.	-0.162252	-0.0226031	-0.139649		n.s.
P11233;H7C3P7;C9JPE8	P11233;H7C3P7	RALA	28.999	0.00145164	0.082548	0.445198	AvC_do	n.s.	n.s.	-0.440859	-0.25732	-0.183539		n.s.
P11234;P11234-2;C9J6B1;P11234-3;C9JQB3;C9JYR1;F8WEQ6	P11234;P11234-2;C9J6B1;P11234-3;C9JQB3	RALB	26.1746	0.30972	0.496443	0.906093	n.s.	n.s.	n.s.	-0.43212	-0.321696	-0.110425		n.s.
P11277-2;H0YJE6	P11277-2	SPTB	33.0832	0.540037	0.0262808	0.0289334	n.s.	AvM_do	MvC_up	0.078148	-0.273912	0.35206	MR sepcific	changed in MR
P11279;P11279-2	P11279;P11279-2	LAMP1	29.0094	0.270669	0.596823	0.81165	n.s.	n.s.	n.s.	-0.262191	-0.144088	-0.118103		n.s.
Q5T4U5;P11310;P11310-2;E9PJM9;E9PRX4;E9PQA8;E9PLN7	Q5T4U5;P11310;P11310-2	ACADM	35.4125	0.755366	0.235487	0.624516	n.s.	n.s.	n.s.	-0.0415543	-0.146954	0.1054		n.s.
P11387;E5RJ95;E5RFS0;E5RJ33;H0YBR3;H0YC03;E5RGE7;E5RGR4;E5RFE3;E5RGR2	P11387	TOP1	24.6171	0.0500587	0.699554	0.370426	n.s.	n.s.	n.s.	-0.968214	-0.230163	-0.738052		n.s.
P11413;P11413-2;E7EUI8;E7EM57;E9PD92	P11413;P11413-2;E7EUI8;E7EM57;E9PD92	G6PD	27.4622	0.971758	0.269331	0.517752	n.s.	n.s.	n.s.	-0.028605	-0.741491	0.712886		n.s.
P11441;Q5HY81;F8WB70	P11441;Q5HY81	UBL4A	25.4814	0.218086	0.0314383	0.582477	n.s.	AvM_do	n.s.	-0.383119	-0.689642	0.306523		changed in MR
P11532;P11532-4;P11532-3;P11532-2	P11532;P11532-4;P11532-3;P11532-2	DMD	35.4683	0.106149	0.00350769	0.000354577	n.s.	AvM_do	MvC_up	0.122405	-0.230951	0.353356	MR sepcific	changed in MR
P11586	P11586	MTHFD1	31.6689	0.463909	0.032313	0.37713	n.s.	AvM_do	n.s.	-0.073745	-0.211134	0.137389		changed in MR
P11717;S4R328	P11717	IGF2R	28.3723	0.349281	0.200041	0.861623	n.s.	n.s.	n.s.	-0.397029	-0.557915	0.160886		n.s.
P11766;H0YAG8;D6RFE4;D6RAY0;D6R9G2	P11766;H0YAG8	ADH5	32.6707	1.43988e-06	0.00103931	0.371271	AvC_up	AvM_up	n.s.	0.457644	0.320677	0.136967	AS specific	changed in AS
P11802;F8VYH9;F8VTV8;F8VWX7;F8VZ51;F8VZZ0;P11802-2;F8W1L8;Q96BE9;F8VYY1;F8VXD2	P11802;F8VYH9;F8VTV8;F8VWX7;F8VZ51;F8VZZ0;P11802-2	CDK4	25.3923	0.0729569	0.0905822	0.00692632	n.s.	n.s.	MvC_up	0.932963	-0.931078	1.86404		n.s.
P11940;E7EQV3;E7ERJ7;P11940-2;A0A087WTT1;H0YAR2;Q9H361;H0YBN4;H0YAP2;H0YAS6;H0YB75;E5RJB9;H0YB86;E5RGH3;E5RH24;H0YAS7;E5RHG7;H0YC10;E5RGC4;E5RFD8;H0YAW6;E5RJM8;Q96DU9-2;Q96DU9	P11940;E7EQV3;E7ERJ7;P11940-2;A0A087WTT1;H0YAR2;Q9H361	PABPC1	30.6063	9.73209e-08	0.000393705	0.247575	AvC_do	AvM_do	n.s.	-0.767886	-0.521083	-0.246803	AS specific	changed in MR
P12004	P12004	PCNA	24.7832	0.800191	0.896305	0.833986	n.s.	n.s.	n.s.	-0.168788	0.0948482	-0.263637		n.s.
P12074	P12074	COX6A1	28.1417	0.0851231	0.539527	0.0913247	n.s.	n.s.	n.s.	-1.22124	0.505102	-1.72634		n.s.
P12081-4;P12081;P12081-3;B4DDD8;B3KWE1;P12081-2;B4E1C5;E7ETE2;D6RF05;A0A2R8YCI2;A0A2R8YFR1	P12081-4;P12081;P12081-3;B4DDD8;B3KWE1;P12081-2;B4E1C5;E7ETE2	HARS	27.7325	0.299737	0.0727832	0.670448	n.s.	n.s.	n.s.	-0.312959	-0.551248	0.238288		n.s.
P12109;A0A087X0S5	P12109;A0A087X0S5	COL6A1	35.7484	5.66703e-05	0.994773	0.00229223	AvC_up	n.s.	MvC_up	0.817624	0.00164565	0.815978	shared	n.s.
P12110;P12110-3;H7C0M5;C9JH44	P12110;P12110-3	COL6A2	34.9739	1.92173e-07	0.330224	0.00091328	AvC_up	n.s.	MvC_up	1.03668	0.203964	0.832717	shared	n.s.
P12111;P12111-2;P12111-5;P12111-3;I3L392	P12111;P12111-2	COL6A3	37.3194	4.64957e-05	0.671524	0.00707801	AvC_up	n.s.	MvC_up	0.75988	0.095537	0.664343	shared	n.s.
P12235;V9GYG0	P12235;V9GYG0	SLC25A4	37.4576	0.000368778	0.613624	0.033519	AvC_do	n.s.	MvC_do	-0.362774	-0.061258	-0.301516	shared	n.s.
P12236	P12236	SLC25A6	32.2037	0.000128916	0.918075	0.00282221	AvC_do	n.s.	MvC_do	-0.541839	0.0182799	-0.560119	shared	n.s.
P12270;P12270-2;Q5SWX9	P12270	TPR	28.0464	0.544482	0.83025	0.862804	n.s.	n.s.	n.s.	-0.223815	-0.0908771	-0.132938		n.s.
P12277;G3V4N7;H0YJG0;G3V461;G3V2I1;H0YJK0	P12277;G3V4N7	CKB	35.167	0.725252	0.0584353	0.326729	n.s.	n.s.	n.s.	-0.0586231	-0.28906	0.230437		n.s.
P12429;D6RFG5;D6RCA8;D6RAZ8	P12429	ANXA3	31.1762	0.000275483	0.000113074	0.786792	AvC_do	AvM_do	n.s.	-0.446338	-0.51784	0.071502	AS specific	changed in MR
P12814-3;P12814-2;P12814;P12814-4;G3V2N5;G3V5M4;G3V380	P12814-3;P12814-2;P12814;P12814-4	ACTN1	34.1632	4.35162e-07	0.0545386	0.0176972	AvC_up	n.s.	MvC_up	1.08577	0.421199	0.664569	shared	n.s.
P12882;J3QLR0;E7EX84	P12882	MYH1	35.2285	0.0617069	0.164482	0.867141	n.s.	n.s.	n.s.	-0.355222	-0.282774	-0.0724482		n.s.
P12883;Q494R4-2;Q494R4	P12883	MYH7	41.4833	0.0328477	0.409556	0.0268931	AvC_do	n.s.	MvC_do	-0.181708	0.0794136	-0.261122	shared	n.s.
P12955;P12955-3;P12955-2;K7ES25;V9GYE4;V9GY89;V9GYL0	P12955;P12955-3;P12955-2	PEPD	28.6013	0.305807	0.0331631	0.504277	n.s.	AvM_do	n.s.	-0.292562	-0.618648	0.326086		changed in MR
P12956;B1AHC9;P12956-2	P12956;B1AHC9;P12956-2	XRCC6	31.2322	0.00802483	0.000196269	0.392706	AvC_do	AvM_do	n.s.	-0.316039	-0.488736	0.172697	AS specific	changed in MR
P13010;H7C0H9	P13010	XRCC5	31.8313	0.000297326	0.000776846	0.992204	AvC_do	AvM_do	n.s.	-0.559788	-0.556373	-0.00341531	AS specific	changed in MR
P13051-2;P13051;F5GYA2;Q68DM5	P13051-2;P13051;F5GYA2;Q68DM5	UNG	26.225	0.588667	0.785825	0.908291	n.s.	n.s.	n.s.	0.268552	0.151389	0.117163		n.s.
P13073;H3BN72;H3BNV9;H3BPG0;Q86WV2;H3BNI5;H3BPR4	P13073;H3BN72;H3BNV9;H3BPG0;Q86WV2	COX4I1	35.2361	0.907469	0.867865	0.879391	n.s.	n.s.	n.s.	-0.0164636	0.0226103	-0.0390739		n.s.
P13473-2;P13473;P13473-3;H0YCG2	P13473-2;P13473;P13473-3	LAMP2	27.8004	0.0537497	0.0215665	0.819551	n.s.	AvM_do	n.s.	-0.527379	-0.664115	0.136737		changed in MR
P13489;H0YCR7;E9PIM9;E9PMJ3;E9PLZ3;E9PIK5;E9PMN0;E9PMA9;E9PR82;E9PMI1	P13489;H0YCR7	RNH1	31.6543	0.0157681	0.813889	0.161118	AvC_up	n.s.	n.s.	0.252733	0.0309563	0.221777		n.s.
P13533	P13533	MYH6	33.9723	6.33693e-06	0.00256074	0.394911	AvC_do	AvM_do	n.s.	-1.86203	-1.2878	-0.574223	AS specific	changed in MR
P13535	P13535	MYH8	25.2158	0.0370005	0.282159	0.633048	AvC_do	n.s.	n.s.	-1.27256	-0.721056	-0.551501		n.s.
P13591-1;A0A087WTF6;P13591-4;H7BYX6;A0A087WTE4;P13591-3;A0A087WVD0	P13591-1;A0A087WTF6;P13591-4;H7BYX6;A0A087WTE4;P13591-3	NCAM1	30.8679	0.0807489	0.0720899	0.954488	n.s.	n.s.	n.s.	0.280051	0.304338	-0.0242863		n.s.
P13611;P13611-5;P13611-2;E9PF17;P13611-3;P13611-4;D6RGZ6;Q86W61	P13611;P13611-5;P13611-2;E9PF17;P13611-3	VCAN	31.3428	2.32254e-07	0.0464771	0.0147324	AvC_up	AvM_up	MvC_up	1.77708	0.693436	1.08365	shared	changed in AS
P13637-3	P13637-3	ATP1A3	31.1204	0.121207	0.0512315	0.819551	n.s.	n.s.	n.s.	-0.278893	-0.367812	0.0889192		n.s.
P13639;M0R0I6	P13639	EEF2	34.0312	3.4622e-07	0.799187	0.000148881	AvC_do	n.s.	MvC_do	-0.452666	-0.0271156	-0.42555	shared	n.s.
P13667;C9JMN9	P13667	PDIA4	30.4194	0.111927	0.12789	0.992876	n.s.	n.s.	n.s.	-0.266983	-0.269812	0.00282904		n.s.
P13671;C9JC72	P13671	C6	28.3568	0.00115913	0.901069	0.0119367	AvC_up	n.s.	MvC_up	1.4614	-0.0733779	1.53478	shared	n.s.
P13674-3;P13674-2	P13674-3;P13674-2	P4HA1	27.6167	0.0538849	0.567194	0.475904	n.s.	n.s.	n.s.	-0.467454	-0.162982	-0.304472		n.s.
P13716;P13716-2;B7ZBK6	P13716;P13716-2	ALAD	30.5643	0.016428	0.0234041	0.996107	AvC_do	AvM_do	n.s.	-0.541124	-0.543133	0.00200904	AS specific	changed in MR
P13726;P13726-2	P13726;P13726-2	F3	24.4857	0.077041	0.0346352	0.836109	n.s.	AvM_up	n.s.	0.738053	0.929441	-0.191388		changed in AS
P13796;Q5TBN3;P13796-2;Q5TBN5	P13796	LCP1	29.0389	0.000937754	0.0512917	0.492166	AvC_do	n.s.	n.s.	-1.38544	-0.87239	-0.513048		n.s.
P13797;F2Z2Z9	P13797	PLS3	31.1375	0.568102	0.277872	0.245214	n.s.	n.s.	n.s.	0.124465	-0.234071	0.358535		n.s.
P13804;P13804-2;H0YLU7;H0YK49;H0YNX6;H0YL12;J3KN60;H0YMU8	P13804;P13804-2;H0YLU7;H0YK49;H0YNX6;H0YL12	ETFA	35.4717	0.000106653	0.144041	0.116303	AvC_do	n.s.	n.s.	-0.393086	-0.157668	-0.235418		n.s.
P13807;M0QYU1	P13807	GYS1	33.6837	0.28453	0.000477216	0.0645929	n.s.	AvM_up	n.s.	0.144659	0.48563	-0.34097		changed in AS
P13861;P13861-2;H7C330;H7C1L0;H7C4A9;C9J830	P13861;P13861-2	PRKAR2A	32.0926	0.355989	0.334482	0.969822	n.s.	n.s.	n.s.	-0.0766754	-0.0840895	0.00741411		n.s.
P13929;P13929-2;P13929-3;E5RGZ4;K7EPM1;K7EKN2;E5RI09;K7EP84;E5RJH5;U3KQQ1	P13929;P13929-2;P13929-3;E5RGZ4;K7EPM1;K7EKN2	ENO3	35.2143	0.96285	0.926102	0.978487	n.s.	n.s.	n.s.	0.00977971	0.0197879	-0.0100082		n.s.
P14174	P14174	MIF	30.5187	0.687333	0.977757	0.821663	n.s.	n.s.	n.s.	-0.108211	0.00801012	-0.116221		n.s.
P14209;P14209-3	P14209;P14209-3	CD99	28.1688	0.00460258	0.651404	0.130038	AvC_up	n.s.	n.s.	0.79709	0.1551	0.641989		n.s.
P14324-2;P14324;A0A087WVN4;A0A087X1D8;A0A087X090;A0A087WTP2	P14324-2;P14324;A0A087WVN4;A0A087X1D8	FDPS	27.8647	0.464157	0.231706	0.817286	n.s.	n.s.	n.s.	0.264186	0.432622	-0.168436		n.s.
P14543;P14543-2	P14543;P14543-2	NID1	33.1772	0.13317	0.000440919	0.129571	n.s.	AvM_do	n.s.	-0.144936	-0.360412	0.215476		changed in MR
P14550;Q5T621;V9GYG2;V9GYP9	P14550	AKR1A1	31.3491	0.731399	0.0980776	0.425646	n.s.	n.s.	n.s.	-0.0709967	-0.314106	0.243109		n.s.
P14618;B4DNK4;H3BU13;H3BN34;H3BQZ3	P14618;B4DNK4	PKM	35.9486	0.450022	0.324555	0.904786	n.s.	n.s.	n.s.	-0.061685	-0.0826775	0.0209925		n.s.
P14618-2;H3BTN5;H3BR70;H3BQ34;H3BUW1;H3BTJ2;H3BT25	P14618-2;H3BTN5;H3BR70;H3BQ34	PKM	32.0974	0.716661	0.111885	0.159664	n.s.	n.s.	n.s.	0.0570108	-0.231749	0.28876		n.s.
P14621;U3KQL2;U3KPX8	P14621;U3KQL2;U3KPX8	ACYP2	29.8463	0.0250824	9.73763e-05	0.179757	AvC_up	AvM_up	n.s.	0.342437	0.656466	-0.314029	AS specific	changed in AS
P14625;Q96GW1;A0A1W2PRR1;H0YIV0;F8W026;F8VPC7	P14625	HSP90B1	33.7894	0.183307	0.86193	0.523774	n.s.	n.s.	n.s.	-0.181758	-0.0289407	-0.152817		n.s.
P14649;F8W1I5	P14649;F8W1I5	MYL6B	30.3002	0.0481731	0.979134	0.207271	AvC_up	n.s.	n.s.	0.766428	0.0126329	0.753795		n.s.
P14672;I3L2R4;P14672-2;F5H081;I3L1S2	P14672;I3L2R4;P14672-2;F5H081	SLC2A4	29.8873	0.0176422	0.0583379	0.880335	AvC_do	n.s.	n.s.	-0.598836	-0.508809	-0.0900268		n.s.
P14854;K7EQD3	P14854	COX6B1	32.4775	0.213661	0.00399051	0.00112676	n.s.	AvM_up	MvC_do	-0.253193	0.601942	-0.855135	MR sepcific	changed in AS
P14866;M0QXS5;P14866-2;M0R1W6;M0QYL7;B4DVF8;M0R076	P14866;M0QXS5;P14866-2	HNRNPL	30.452	0.387258	0.0529806	0.528942	n.s.	n.s.	n.s.	-0.128909	-0.287655	0.158745		n.s.
P14868;P14868-2;H7BZ35;C9J7S3;C9JLC1;H7C278;C9JQM9	P14868;P14868-2	DARS	30.6507	0.00195029	0.000597737	0.781637	AvC_do	AvM_do	n.s.	-0.355456	-0.424002	0.0685461	AS specific	changed in MR
P14923;C9JK18;C9JKY1;C9J826;C9JTX4;C9JPI2;K7ERP3	P14923	JUP	34.1265	0.0962028	0.392356	0.0636028	n.s.	n.s.	n.s.	0.170919	-0.0977928	0.268712		n.s.
P14927;B7Z2R2;P14927-2	P14927;B7Z2R2;P14927-2	UQCRB	33.9015	0.000572412	0.198901	0.179757	AvC_do	n.s.	n.s.	-0.416541	-0.168745	-0.247795		n.s.
P15088	P15088	CPA3	29.7566	0.0266848	6.13532e-06	0.039882	AvC_do	AvM_do	MvC_up	-1.00343	-2.3155	1.31207	divergent	changed in MR
P15090;E5RIR0;E5RH45	P15090	FABP4	31.7112	0.0208291	0.621274	0.281739	AvC_do	n.s.	n.s.	-0.488959	-0.125278	-0.363681		n.s.
P15104;A0A2R8YDT1	P15104;A0A2R8YDT1	GLUL	25.0526	0.471091	0.00568288	0.00567718	n.s.	AvM_up	MvC_do	-0.332376	1.24348	-1.57586	MR sepcific	changed in AS
P15121;E9PCX2;E9PEF9;C9JRZ8;C9JRZ8-2	P15121;E9PCX2	AKR1B1	33.4308	0.0531814	0.827997	0.141824	n.s.	n.s.	n.s.	0.313528	-0.0442967	0.357825		n.s.
P15144;H0YMC1;H0YLZ8;H0YKT6	P15144	ANPEP	24.6512	0.416683	0.768564	0.484276	n.s.	n.s.	n.s.	-0.359544	0.151483	-0.511027		n.s.
P15170-2;P15170-3;P15170;H3BR35;H3BSV8;H3BMT9	P15170-2;P15170-3;P15170;H3BR35	GSPT1	28.7211	0.0206068	0.14225	0.714862	AvC_do	n.s.	n.s.	-0.833835	-0.568094	-0.265742		n.s.
P15259	P15259	PGAM2	35.212	0.0234889	0.0482286	0.953749	AvC_do	AvM_do	n.s.	-0.288752	-0.269015	-0.0197369	AS specific	changed in MR
P15374;A0A087WTB8;Q5TBK7	P15374;A0A087WTB8;Q5TBK7	UCHL3	29.544	0.753856	0.611664	0.918876	n.s.	n.s.	n.s.	0.0493695	0.0811916	-0.0318221		n.s.
P15531;P15531-2	P15531;P15531-2	NME1	26.3535	0.182444	0.154095	0.950559	n.s.	n.s.	n.s.	0.555661	0.622178	-0.0665166		n.s.
P15586;H7C3P4;F6S8M0;P15586-2;H0YFA9	P15586;H7C3P4;F6S8M0;P15586-2;H0YFA9	GNS	26.4875	0.000808653	0.0095333	0.779804	AvC_do	AvM_do	n.s.	-1.28058	-1.0502	-0.230377	AS specific	changed in MR
P15848;P15848-2;A0A2U3U034	P15848;P15848-2;A0A2U3U034	ARSB	26.2461	0.251925	0.933718	0.459725	n.s.	n.s.	n.s.	-0.406722	0.0361771	-0.442899		n.s.
P15880;H0YEN5;E9PMM9;E9PQD7;E9PPT0;I3L404;E9PM36;H3BNG3;H0YE27	P15880;H0YEN5;E9PMM9;E9PQD7;E9PPT0;I3L404;E9PM36	RPS2	31.0695	0.00148064	0.000356012	0.729499	AvC_do	AvM_do	n.s.	-0.503939	-0.616804	0.112865	AS specific	changed in MR
P15924;P15924-3;P15924-2	P15924;P15924-3;P15924-2	DSP	35.7635	0.193632	0.0368725	0.00819119	n.s.	AvM_do	MvC_up	0.151013	-0.250976	0.401989	MR sepcific	changed in MR
P15927;P15927-2;P15927-3;Q5TEJ0;Q5TEJ7	P15927;P15927-2;P15927-3;Q5TEJ0	RPA2	26.6562	0.0443758	0.000678927	0.313829	AvC_do	AvM_do	n.s.	-0.645606	-1.16798	0.52237	AS specific	changed in MR
P16070-12;P16070-14;P16070-13;P16070-8;P16070-18;P16070-11;P16070-10;P16070-16;P16070-17;P16070-6;P16070-4;P16070-3;P16070-7;P16070-5;P16070;H0YD13;H0Y2P0;H0Y5E4;P16070-15;H0YE40;H0YDW7;H0YCV9;P16070-9;H0YDX6;E9PKC6;H0YD17;J3KN83;Q86UZ1;H0YF08;P16070-19;H0YD90;H0YEV3;H0YEU1	P16070-12;P16070-14;P16070-13;P16070-8;P16070-18;P16070-11;P16070-10;P16070-16;P16070-17;P16070-6;P16070-4;P16070-3;P16070-7;P16070-5;P16070;H0YD13;H0Y2P0;H0Y5E4;P16070-15	CD44	27.3612	0.106558	0.851608	0.410616	n.s.	n.s.	n.s.	-0.621131	-0.0885889	-0.532542		n.s.
P16083;Q5TD07;Q5TD05;A2A2U4	P16083;Q5TD07;Q5TD05	NQO2	29.3748	0.0531814	0.62792	0.427042	n.s.	n.s.	n.s.	-0.784171	-0.234086	-0.550084		n.s.
P16104;Q96QV6	P16104;Q96QV6	H2AFX	34.9231	0.000617957	0.00991547	0.735486	AvC_do	AvM_do	n.s.	-0.739697	-0.589054	-0.150643	AS specific	changed in MR
P16152;E9PQ63;A8MTM1;P16152-2	P16152;E9PQ63;A8MTM1;P16152-2	CBR1	30.9117	0.00395733	0.748903	0.0163522	AvC_up	n.s.	MvC_up	0.34975	-0.0486099	0.39836	shared	n.s.
P16157-3;P16157-16;P16157-12;P16157-14;P16157-8;P16157-5;P16157;P16157-10;P16157-2;H0YAY8	P16157-3;P16157-16;P16157-12;P16157-14;P16157-8;P16157-5;P16157;P16157-10;P16157-2	ANK1	26.2599	0.53116	0.80941	0.594706	n.s.	n.s.	n.s.	0.644954	-0.284291	0.929245		n.s.
P16219;E9PE82	P16219;E9PE82	ACADS	32.9857	0.393046	0.992963	0.633852	n.s.	n.s.	n.s.	-0.216881	-0.00270505	-0.214176		n.s.
P16278-3;P16278;E7EQ29;P16278-2;C9J539;C9J4G9;F8WF40;C9JF15;C9JWX1;Q6UWU2-2	P16278-3;P16278;E7EQ29;P16278-2	GLB1	24.348	0.422126	0.0856696	0.0582077	n.s.	n.s.	n.s.	0.392412	-0.834507	1.22692		n.s.
P16284;P16284-6;P16284-3;P16284-5;P16284-4;P16284-2;A0A075B727;A0A075B728;A0A075B737	P16284;P16284-6;P16284-3;P16284-5;P16284-4;P16284-2	PECAM1	27.6052	0.00513357	0.00164806	0.787951	AvC_do	AvM_do	n.s.	-0.662582	-0.800901	0.138319	AS specific	changed in MR
P16298;P16298-4;P16298-3;Q5F2F8;P16298-2;Q5F2G0	P16298;P16298-4;P16298-3;Q5F2F8;P16298-2	PPP3CB	27.7932	0.82263	0.688691	0.704685	n.s.	n.s.	n.s.	-0.0528039	0.0968394	-0.149643		n.s.
P16401	P16401	HIST1H1B	28.1872	0.818364	0.0701541	0.143299	n.s.	n.s.	n.s.	0.107924	-0.76074	0.868664		n.s.
P16402	P16402	HIST1H1D	25.2542	0.211754	0.0168925	0.484095	n.s.	AvM_do	n.s.	-0.591874	-1.1634	0.571523		changed in MR
P16403	P16403	HIST1H1C	33.3317	0.419916	0.000470536	0.0391721	n.s.	AvM_do	MvC_up	-0.13552	-0.588572	0.453052	MR sepcific	changed in MR
P16435;H0Y4R2;E7EMD0;E7EWU0;C9JU80	P16435;H0Y4R2;E7EMD0	POR	28.3182	0.000422593	0.483414	0.0561096	AvC_do	n.s.	n.s.	-0.640504	-0.14724	-0.493264		n.s.
P16452;P16452-2;P16452-3;F5H563;H3BTE6;H3BUR1;H3BPV8	P16452;P16452-2;P16452-3;F5H563;H3BTE6	EPB42	24.1619	0.000539939	0.352405	0.000690559	AvC_up	n.s.	MvC_up	2.34284	-0.703273	3.04612	shared	n.s.
P16615;P16615-5;P16615-4;H7C5W9;J3QSY6;H3BVB2;H3BTW4	P16615;P16615-5;P16615-4;H7C5W9	ATP2A2	35.84	0.000396725	0.124172	0.221621	AvC_do	n.s.	n.s.	-0.408953	-0.189761	-0.219192		n.s.
P16615-2	P16615-2	ATP2A2	29.8537	8.40507e-06	0.0219355	0.155786	AvC_do	AvM_do	n.s.	-1.05763	-0.562733	-0.494896	AS specific	changed in MR
P16615-3;A0A0C4DH86	P16615-3	ATP2A2	24.7683	0.0023776	0.023696	0.768575	AvC_do	AvM_do	n.s.	-1.35027	-1.07164	-0.278628	AS specific	changed in MR
P16930;P16930-2;H0YLC7;H3BNP8	P16930;P16930-2	FAH	28.9243	0.268283	0.0867436	0.744616	n.s.	n.s.	n.s.	-0.282589	-0.447857	0.165268		n.s.
P16949;A2A2D0;P16949-2	P16949;A2A2D0;P16949-2	STMN1	28.2232	0.00230713	0.0958088	0.478666	AvC_up	n.s.	n.s.	0.759636	0.445137	0.314499		n.s.
P16989;P16989-3;A0A0D9SEI8	P16989;P16989-3	YBX3	30.1244	0.265093	0.0558758	0.648281	n.s.	n.s.	n.s.	0.188894	0.331462	-0.142567		n.s.
P17050	P17050	NAGA	24.775	0.146223	0.513869	0.724476	n.s.	n.s.	n.s.	-0.568947	-0.292657	-0.27629		n.s.
P17066;P48741	P17066	HSPA6	32.2551	0.94977	0.0879299	0.222687	n.s.	n.s.	n.s.	-0.0365954	0.821042	-0.857638		n.s.
P17081;E5RFZ3;F8WET9	P17081	RHOQ	24.9292	0.361474	0.983669	0.593561	n.s.	n.s.	n.s.	-0.366502	0.00968368	-0.376186		n.s.
P17096;P17096-3;P17096-2;A0A1W2PRV2	P17096;P17096-3;P17096-2	HMGA1	25.6606	2.77487e-05	0.391732	0.0156693	AvC_up	n.s.	MvC_up	1.7941	0.407226	1.38688	shared	n.s.
P17152	P17152	TMEM11	28.5056	0.302902	0.910522	0.492166	n.s.	n.s.	n.s.	-0.254909	0.0339885	-0.288898		n.s.
P17174;P17174-2	P17174;P17174-2	GOT1	36.3319	0.0752188	0.935333	0.288466	n.s.	n.s.	n.s.	-0.171345	-0.00978085	-0.161564		n.s.
P17302	P17302	GJA1	31.1685	0.304428	0.490473	0.905815	n.s.	n.s.	n.s.	0.194939	0.145444	0.0494956		n.s.
P17540;D6R998	P17540	CKMT2	36.9491	0.000331175	0.409556	0.0617073	AvC_do	n.s.	n.s.	-0.413386	-0.107128	-0.306258		n.s.
P17568;M0R3B8	P17568	NDUFB7	30.629	0.00106939	0.520905	0.0838519	AvC_do	n.s.	n.s.	-0.464881	-0.10723	-0.357651		n.s.
P17612;P17612-2;K7ERP6;Q15136;K7ENJ5;K7EMV1	P17612;P17612-2;K7ERP6	PRKACA	32.0591	0.498424	0.388311	0.283306	n.s.	n.s.	n.s.	0.069697	-0.0918617	0.161559		n.s.
P17655;P17655-2;C9JWY7	P17655;P17655-2	CAPN2	30.8541	0.146352	0.353471	0.842045	n.s.	n.s.	n.s.	-0.194496	-0.136035	-0.0584613		n.s.
P17661	P17661	DES	38.4274	0.0272906	0.00723128	0.761466	AvC_up	AvM_up	n.s.	0.228002	0.29424	-0.0662374	AS specific	changed in AS
P17813;P17813-2	P17813;P17813-2	ENG	27.6579	0.601871	0.269191	0.767625	n.s.	n.s.	n.s.	-0.107053	-0.222214	0.115161		n.s.
P17844;J3KTA4;P17844-2;J3QRQ7;J3KRZ1;J3QSF1;J3KRX8;J3QR02;J3KTQ4;X6RLV5;J3QRN5;J3QS79;J3QKN9;J3QLG9;J3QR62	P17844;J3KTA4;P17844-2	DDX5	28.0547	0.0140675	0.52669	0.283306	AvC_do	n.s.	n.s.	-0.41778	-0.126536	-0.291244		n.s.
P17858;P17858-2;F8WEU2	P17858;P17858-2	PFKL	30.462	0.580903	0.283421	0.793799	n.s.	n.s.	n.s.	-0.155894	-0.299277	0.143383		n.s.
P17900;H0YBY3;E5RJD0	P17900;H0YBY3	GM2A	27.4813	0.971758	0.36562	0.567591	n.s.	n.s.	n.s.	-0.01721	0.371767	-0.388977		n.s.
P17931;G3V3R6	P17931;G3V3R6	LGALS3	31.9363	0.697417	0.025008	0.211274	n.s.	AvM_do	n.s.	-0.0768641	-0.409428	0.332564		changed in MR
P17948;A0A1W2PNW4;P17948-2;P17948-3;P17948-4;P17948-6;P17948-5	P17948;A0A1W2PNW4;P17948-2;P17948-3;P17948-4	FLT1	26.4374	0.15437	0.300354	0.893097	n.s.	n.s.	n.s.	1.5732	1.23403	0.339164		n.s.
P17987;E7ERF2;E7EQR6;F5H282;F5GZ03;F5H136;F5GZI8;F5H676;F5H726;F5GYL4;F5H7Y1	P17987;E7ERF2;E7EQR6;F5H282	TCP1	31.6691	0.00443945	0.0155724	0.907448	AvC_do	AvM_do	n.s.	-0.273601	-0.247958	-0.0256425	AS specific	changed in MR
P18031;B4DSN5	P18031;B4DSN5	PTPN1	26.5146	0.149359	0.071548	0.0121733	n.s.	n.s.	MvC_do	-0.680216	0.887137	-1.56735		n.s.
P18077;C9K025;F8WBS5;F8WB72	P18077;C9K025;F8WBS5;F8WB72	RPL35A	30.4987	0.0681282	0.895897	0.190418	n.s.	n.s.	n.s.	-0.417242	0.038616	-0.455858		n.s.
P18084;V9GZ57;H7C4W1;H7C5U2;V9GYZ1;H7C580;V9GYD8	P18084	ITGB5	25.8345	0.816328	0.423208	0.505742	n.s.	n.s.	n.s.	0.130162	-0.426477	0.556638		n.s.
P18085;C9JPM4;C9JAK5	P18085;C9JPM4;C9JAK5	ARF4	29.4819	0.783342	0.917477	0.837021	n.s.	n.s.	n.s.	-0.0613346	0.0247839	-0.0861184		n.s.
P18124;A8MUD9;C9JIJ5;C9JZ88	P18124;A8MUD9	RPL7	30.8551	0.000205639	0.106277	0.189709	AvC_do	n.s.	n.s.	-0.445143	-0.205897	-0.239246		n.s.
P18206-2;P18206;P18206-3;A0A096LPE1	P18206-2;P18206	VCL	36.25	7.8081e-06	0.0425106	0.0979268	AvC_up	AvM_up	n.s.	0.413923	0.19507	0.218853	AS specific	changed in AS
P18428	P18428	LBP	29.2848	0.0536889	0.794179	0.130353	n.s.	n.s.	n.s.	-0.968559	0.164131	-1.13269		n.s.
P18583-5;P18583-2;P18583-7;P18583;P18583-9;P18583-10;P18583-4;P18583-3;P18583-6;H7C1M2;J3QSZ5;P18583-8;H7C2G8;H7C1S4;H7C257	P18583-5;P18583-2;P18583-7;P18583;P18583-9;P18583-10;P18583-4;P18583-3;P18583-6;H7C1M2	SON	26.9527	0.954019	0.355524	0.543333	n.s.	n.s.	n.s.	-0.0743379	1.04931	-1.12365		n.s.
P18669	P18669	PGAM1	33.0657	0.442921	0.98039	0.656014	n.s.	n.s.	n.s.	0.115064	-0.00416154	0.119226		n.s.
P18859;P18859-2;A8MUH2	P18859;P18859-2;A8MUH2	ATP5PF	33.109	0.336035	0.847521	0.480476	n.s.	n.s.	n.s.	-0.192621	0.0457959	-0.238417		n.s.
P19021-6;P19021;P19021-5;P19021-4;P19021-3;P19021-2;H7BYD9;H0Y9I4;D6RG20;F8W8D9;D6RCD5;D6RF09;D6RAQ2	P19021-6;P19021;P19021-5;P19021-4;P19021-3;P19021-2;H7BYD9	PAM	27.211	0.102566	0.392845	0.736738	n.s.	n.s.	n.s.	-0.60776	-0.353816	-0.253944		n.s.
P19022;P19022-2;C9J8J8;C9J126;C9JMH2;A0A0G2JRA4	P19022;P19022-2	CDH2	33.973	0.110616	0.597789	0.594706	n.s.	n.s.	n.s.	0.220543	0.0857034	0.134839		n.s.
P19174;P19174-2;V9GY63;V9GY71;V9GYH5;A0A0D9SEK2;M0QX77	P19174;P19174-2	PLCG1	24.1132	0.711286	0.926102	0.800344	n.s.	n.s.	n.s.	-0.113741	0.0317432	-0.145484		n.s.
P19338;H7BY16;C9JYW2;C9JLB1;C9J1H7;C9JWL1	P19338;H7BY16	NCL	30.7645	0.810362	0.871732	0.973271	n.s.	n.s.	n.s.	-0.0367628	-0.0259832	-0.0107796		n.s.
P19367;P19367-4;P19367-2;P19367-3;B1AR63;B1AR62;Q2TB90;A0A2R8Y626;Q2TB90-3;Q2TB90-2	P19367;P19367-4;P19367-2;P19367-3	HK1	34.7129	0.461087	0.791955	0.834489	n.s.	n.s.	n.s.	0.0849426	0.0352426	0.0497001		n.s.
P19429	P19429	TNNI3	36.2704	0.00155772	0.424376	0.134725	AvC_do	n.s.	n.s.	-0.425097	-0.122339	-0.302758		n.s.
P19525;P19525-2;C9JZT2;F8WBH4	P19525;P19525-2	EIF2AK2	26.4951	0.817965	0.00206815	0.0300968	n.s.	AvM_do	MvC_up	-0.0715408	-0.856593	0.785052	MR sepcific	changed in MR
P19623;K7EL89;K7ESL0;K7EQ47;K7EKM4	P19623	SRM	26.2683	0.919287	0.0678343	0.247575	n.s.	n.s.	n.s.	0.0577891	0.870835	-0.813045		n.s.
P19634;P19634-2;B1ALD5;Q9UBY0	P19634	SLC9A1	25.062	0.665602	0.963218	0.798958	n.s.	n.s.	n.s.	-0.21342	0.0248887	-0.238309		n.s.
P19652	P19652	ORM2	32.2761	0.577363	0.64971	0.515016	n.s.	n.s.	n.s.	0.23301	-0.206707	0.439717		n.s.
P19784;H3BSA1;H3BV19;H3BNI9	P19784;H3BSA1	CSNK2A2	26.8036	0.0093345	0.117514	0.632666	AvC_do	n.s.	n.s.	-1.05181	-0.68231	-0.369496		n.s.
P19823;Q5T985;Q5T987	P19823;Q5T985	ITIH2	31.9046	0.01366	0.807497	0.0505393	AvC_up	n.s.	n.s.	0.581094	-0.0725222	0.653617		n.s.
P19827;P19827-2;P19827-3;H7C0N0;F8WAS2;H7C5I0	P19827;P19827-2;P19827-3	ITIH1	31.958	0.0206894	0.775233	0.0617073	AvC_up	n.s.	n.s.	0.596734	-0.0923488	0.689083		n.s.
P19838;P19838-2;P19838-3;D6RF93;D6RH30;D6RC45;D6RDI9	P19838;P19838-2;P19838-3	NFKB1	25.585	0.0675653	0.935269	0.207637	n.s.	n.s.	n.s.	1.28608	-0.0721439	1.35823		n.s.
P19971;C9JGI3;P19971-2;A0A1W2PP80	P19971;C9JGI3;P19971-2	TYMP	28.3447	0.00225029	0.00293932	0.966355	AvC_do	AvM_do	n.s.	-0.998336	-1.03648	0.0381431	AS specific	changed in MR
P20042	P20042	EIF2S2	28.6004	0.522197	0.657938	0.950157	n.s.	n.s.	n.s.	-0.131752	-0.100808	-0.0309442		n.s.
P20073-2;P20073	P20073-2;P20073	ANXA7	31.6259	1.66827e-05	0.00485441	0.407606	AvC_up	AvM_up	n.s.	0.448599	0.304404	0.144195	AS specific	changed in AS
P20290;P20290-2;D6RDG3;H0Y9Y1	P20290;P20290-2;D6RDG3	BTF3	28.9687	0.00256488	0.00585295	0.970078	AvC_do	AvM_do	n.s.	-1.11419	-1.08031	-0.0338834	AS specific	changed in MR
P20338;A0A087WYT5	P20338	RAB4A	28.28	0.167212	0.241635	0.959304	n.s.	n.s.	n.s.	-0.212129	-0.191388	-0.020741		n.s.
P20339-2;P20339;F8WCY6;F8WD79	P20339-2;P20339	RAB5A	26.553	0.0448801	0.78412	0.297768	AvC_do	n.s.	n.s.	-0.678374	-0.11591	-0.562464		n.s.
P20340-2;P20340-4	P20340-2;P20340-4	RAB6A	30.7581	0.276704	0.0328142	0.530029	n.s.	AvM_do	n.s.	-0.141151	-0.281892	0.14074		changed in MR
P20591;F8W8T1;P20591-2;H9KVC7;H9KVC9;H9KVD0;H9KVC4;H9KVD3	P20591;F8W8T1;P20591-2	MX1	25.0358	0.599751	0.269348	0.768907	n.s.	n.s.	n.s.	-0.396375	-0.817709	0.421334		n.s.
P20592;P20592-2;C9JEL4;C9JS04;C9JZQ9	P20592	MX2	24.6229	0.498424	0.0130682	0.225224	n.s.	AvM_do	n.s.	-0.40563	-1.44649	1.04086		changed in MR
P20618	P20618	PSMB1	30.981	1.83696e-05	0.000356012	0.827369	AvC_do	AvM_do	n.s.	-0.617456	-0.548314	-0.0691421	AS specific	changed in MR
P20645;F5GX30;H0YGE9;F5GXE0;F5GXU0;H0YGT2;F5H883;H0YF90;F5H4U1	P20645;F5GX30	M6PR	26.7469	0.421522	0.214505	0.828181	n.s.	n.s.	n.s.	-0.319694	-0.498834	0.17914		n.s.
P20674;H3BNX8;H3BRM5;H3BV69;H3BRI0	P20674;H3BNX8;H3BRM5;H3BV69	COX5A	34.8493	0.0196127	0.710404	0.0495824	AvC_do	n.s.	MvC_do	-0.54668	0.105881	-0.652561	shared	n.s.
P20700;E9PBF6;A0A0D9SFE5;A0A0D9SFY5	P20700;E9PBF6;A0A0D9SFE5	LMNB1	28.6921	0.0508932	0.0234995	0.843367	n.s.	AvM_do	n.s.	-0.441045	-0.540749	0.0997049		changed in MR
P20774;Q5TBF5	P20774;Q5TBF5	OGN	33.9317	0.0119465	0.374684	0.00957189	AvC_up	n.s.	MvC_up	0.874502	-0.34647	1.22097	shared	n.s.
P20810-6;P20810-7;A0A0C4DGB5;P20810-10;P20810-9;P20810-5;A0A0A0MR45;E7EQA0;H0YD33;F8W7E0;H0YA91;E9PSG1;D6RGF7;E7EN75;D6RBR1	P20810-6;P20810-7;A0A0C4DGB5;P20810-10;P20810-9;P20810-5;A0A0A0MR45;E7EQA0;H0YD33	CAST	31.5195	0.00879559	0.107276	0.645407	AvC_up	n.s.	n.s.	0.334458	0.221526	0.112932		n.s.
P20908-2;P20908	P20908-2;P20908	COL5A1	28.4169	0.00509458	0.266586	0.341813	AvC_up	n.s.	n.s.	1.14897	0.5023	0.646672		n.s.
P20962;F5H7R9;F5GXR3	P20962	PTMS	27.6539	0.0266815	0.131042	0.783658	AvC_up	n.s.	n.s.	0.741414	0.543068	0.198346		n.s.
P21266;A0A0A0MTN3	P21266;A0A0A0MTN3	GSTM3	32.2696	0.075537	0.424376	0.641793	n.s.	n.s.	n.s.	-0.370141	-0.187275	-0.182865		n.s.
P21281;H0YC04;E5RGH6;H0YAT8	P21281;H0YC04	ATP6V1B2	29.1629	0.140317	0.128153	0.963515	n.s.	n.s.	n.s.	-0.297743	-0.322989	0.0252462		n.s.
P21283;E7EV59	P21283;E7EV59	ATP6V1C1	26.9663	0.641823	0.814037	0.67225	n.s.	n.s.	n.s.	-0.172949	0.0969242	-0.269873		n.s.
P21291;E9PP21;E9PS42;E9PND2;A0A087X134	P21291;E9PP21;E9PS42;E9PND2	CSRP1	29.8893	0.0234028	0.568855	0.0365798	AvC_up	n.s.	MvC_up	1.1244	-0.334698	1.45909	shared	n.s.
P21333-2;P21333;Q60FE5;A0A087WWY3;F8WE98;H0Y5C6;H7C2E7	P21333-2;P21333;Q60FE5;A0A087WWY3	FLNA	34.765	0.0164636	0.417758	0.0147324	AvC_up	n.s.	MvC_up	0.923041	-0.353958	1.277	shared	n.s.
P21397	P21397	MAOA	33.2022	0.0142404	0.0583457	0.000788006	AvC_up	n.s.	MvC_up	0.268684	-0.221117	0.489801	shared	n.s.
P21399;F5H2R8;F5H143	P21399	ACO1	33.0808	0.299927	0.290159	0.975222	n.s.	n.s.	n.s.	-0.148958	-0.159672	0.0107141		n.s.
P21589;P21589-2;Q96B60;H0Y7R7;H0Y3X5	P21589;P21589-2;Q96B60	NT5E	26.2582	0.668953	0.419002	0.408368	n.s.	n.s.	n.s.	0.235989	-0.441415	0.677404		n.s.
P21695;P21695-2	P21695;P21695-2	GPD1	28.0691	0.291323	0.027164	0.486302	n.s.	AvM_do	n.s.	-0.550747	-1.16845	0.617705		changed in MR
P21796	P21796	VDAC1	35.5424	0.100054	0.95637	0.328734	n.s.	n.s.	n.s.	-0.163203	-0.00675503	-0.156448		n.s.
P21810	P21810	BGN	33.8567	3.16913e-07	0.112889	0.00639323	AvC_up	n.s.	MvC_up	2.14921	0.68211	1.4671	shared	n.s.
P21912	P21912	SDHB	34.1108	0.00023222	0.605506	0.0254404	AvC_do	n.s.	MvC_do	-0.380726	-0.0633945	-0.317332	shared	n.s.
P21953;P21953-2	P21953	BCKDHB	29.4812	0.001489	0.139703	0.33516	AvC_do	n.s.	n.s.	-1.18411	-0.592288	-0.591817		n.s.
P21964-2;P21964;E7EMS6;E7EUU8;F8WBW9	P21964-2;P21964;E7EMS6;E7EUU8	COMT	28.8909	0.725252	0.329972	0.372858	n.s.	n.s.	n.s.	-0.11951	0.31715	-0.43666		n.s.
P21980;P21980-2;A2A299;P21980-3;A2A2A0;A0A087WZC4;A0A087WVW4;A0A087WVS3;O43548-2;O43548	P21980;P21980-2	TGM2	35.0184	6.80071e-09	0.291993	0.000109082	AvC_up	n.s.	MvC_up	0.925986	0.170461	0.755525	shared	n.s.
P22033	P22033	MMUT	31.2782	4.79796e-05	0.000440919	0.893097	AvC_do	AvM_do	n.s.	-0.47229	-0.436105	-0.0361851	AS specific	changed in MR
P22059;H0YCV6	P22059	OSBP	28.575	0.157734	0.0126176	0.503136	n.s.	AvM_do	n.s.	-0.418654	-0.765565	0.34691		changed in MR
P22102;P22102-2;F8WD69;C9JBJ1;C9JTV6;C9JKQ7;A0A140TA71;H7C366	P22102;P22102-2	GART	29.5239	0.861257	0.405363	0.520643	n.s.	n.s.	n.s.	-0.0399549	0.174549	-0.214504		n.s.
P22234;P22234-2;E9PBS1;D6RF62	P22234;P22234-2;E9PBS1;D6RF62	PAICS	29.036	0.0460285	0.243081	0.719531	AvC_do	n.s.	n.s.	-0.296196	-0.18825	-0.107946		n.s.
P22307-8;P22307;P22307-7;P22307-2;P22307-6;H0YF61;E9PLD1;P22307-3;H0YCB0;H0YD06;P22307-5	P22307-8;P22307;P22307-7;P22307-2;P22307-6	SCP2	29.2468	5.24764e-05	0.00510546	0.530029	AvC_do	AvM_do	n.s.	-0.481808	-0.348166	-0.133642	AS specific	changed in MR
P22314-2;P22314;Q5JRR6;Q5JRR9;Q5JRS0;Q5JRS2;Q5JRS1;Q5JRS3	P22314-2;P22314	UBA1	33.1212	0.929433	0.0673303	0.176702	n.s.	n.s.	n.s.	0.00906597	-0.155719	0.164785		n.s.
Q32Q12;P22392-2;P22392;J3KPD9;E7ERL0;F6XY72;E5RHP0;C9K028	Q32Q12;P22392-2;P22392;J3KPD9;E7ERL0	NME1-NME2	32.321	0.165718	0.0848416	0.0165484	n.s.	n.s.	MvC_do	-0.13146	0.170581	-0.30204		n.s.
P22413;E9PE72;A0A3B3ISN7	P22413	ENPP1	24.7412	0.466447	0.663731	0.447688	n.s.	n.s.	n.s.	0.385105	-0.257762	0.642867		n.s.
P22570-5;P22570;P22570-7;P22570-2;P22570-3;A0A0A0MTR6;A0A0C4DFN8;A0A0A0MSZ4;P22570-4;A0A0C4DGN7;A0A0A0MT64;A0A0A0MTN9;J3QKZ8;J3QQW7;J3KS64	P22570-5;P22570;P22570-7;P22570-2;P22570-3;A0A0A0MTR6;A0A0C4DFN8;A0A0A0MSZ4;P22570-4;A0A0C4DGN7;A0A0A0MT64;A0A0A0MTN9	FDXR	27.9376	0.749129	0.012105	0.0287443	n.s.	AvM_do	MvC_up	0.0904136	-0.638845	0.729258	MR sepcific	changed in MR
P22612	P22612	PRKACG	27.7304	0.60812	0.617854	0.514372	n.s.	n.s.	n.s.	-0.277844	0.288614	-0.566459		n.s.
P22626;P22626-2;A0A087WUI2	P22626;P22626-2;A0A087WUI2	HNRNPA2B1	32.8272	0.673275	0.262025	0.709394	n.s.	n.s.	n.s.	0.0505383	0.128535	-0.0779965		n.s.
P22694;A0A0A0MS54;P22694-4;P22694-3;P22694-5;P22694-7;P22694-6;P22694-9;P22694-2;A0A087WVC4;P22694-10;P22694-8;B1APF9;B1APG3;B1APG2;B1APF8;B1APG1;B1APG0;B1APF7	P22694;A0A0A0MS54;P22694-4;P22694-3;P22694-5;P22694-7;P22694-6;P22694-9;P22694-2;A0A087WVC4;P22694-10;P22694-8;B1APF9;B1APG3;B1APG2;B1APF8;B1APG1;B1APG0	PRKACB	27.6865	0.333408	0.330033	0.978487	n.s.	n.s.	n.s.	-0.31255	-0.332246	0.0196965		n.s.
P22695	P22695	UQCRC2	36.3202	1.74112e-07	0.00282928	0.115456	AvC_do	AvM_do	n.s.	-0.684386	-0.393775	-0.290611	AS specific	changed in MR
P22748;K7EKY5;K7EIH9;K7ENI8;P22748-2	P22748;K7EKY5	CA4	29.0162	5.08962e-10	0.000140901	0.0530962	AvC_do	AvM_do	n.s.	-1.97374	-1.19053	-0.783216	AS specific	changed in MR
P22830;P22830-2;K7ELX4;K7EJX5;K7EKP7;K7EJM8	P22830;P22830-2;K7ELX4	FECH	31.052	0.830647	0.194687	0.521865	n.s.	n.s.	n.s.	-0.0290558	-0.160262	0.131206		n.s.
P22897;P22897-2	P22897	MRC1	27.3077	0.560451	0.588244	0.999962	n.s.	n.s.	n.s.	-0.374083	-0.37411	2.72297e-05		n.s.
P23141;P23141-2;P23141-3;H3BQV8;A0A140TA63;H3BSU0;Q9UKY3;H3BQR4;REV__F8WE95;Q9UKY3-2	P23141;P23141-2;P23141-3	CES1	30.8714	0.0364635	0.9655	0.182172	AvC_up	n.s.	n.s.	0.54866	0.0138232	0.534836		n.s.
P23142;P23142-2;P23142-3;CON__ENSEMBL:ENSBTAP00000016046;B1AHM7;B1AHM9;B1AHM8;H7C1M6;B1AHN3;B1AHM6;A0A0U1RRA4	P23142;P23142-2;P23142-3	FBLN1	30.6785	1.72089e-05	0.61852	0.00471741	AvC_up	n.s.	MvC_up	1.27185	0.172995	1.09886	shared	n.s.
P23142-4;B1AHL2	P23142-4;B1AHL2	FBLN1	27.6221	9.95556e-06	0.266859	0.0147463	AvC_up	n.s.	MvC_up	2.65481	0.712726	1.94209	shared	n.s.
P23229-4;P23229-2;P23229-9;P23229-6;P23229-5;P23229-3;P23229;P23229-7;H7BZ97;C9JXX7	P23229-4;P23229-2;P23229-9;P23229-6;P23229-5;P23229-3;P23229;P23229-7	ITGA6	28.2547	0.00336375	0.000487344	0.669537	AvC_do	AvM_do	n.s.	-0.574079	-0.737119	0.16304	AS specific	changed in MR
P23246;P23246-2;H0Y9K7;H0Y9U2	P23246;P23246-2	SFPQ	31.1152	0.551292	0.522593	0.969822	n.s.	n.s.	n.s.	-0.0713905	-0.0814734	0.0100829		n.s.
P23258;K7EIS0;K7EKE5	P23258	TUBG1	26.4855	0.00180569	0.0732455	0.500175	AvC_do	n.s.	n.s.	-1.14375	-0.70148	-0.442268		n.s.
P23284	P23284	PPIB	31.0152	0.003933	0.00565911	0.980404	AvC_do	AvM_do	n.s.	-0.506924	-0.516416	0.0094926	AS specific	changed in MR
P23297;Q5T7Y5;Q5T7Y4;Q5T7Y6	P23297;Q5T7Y5;Q5T7Y4;Q5T7Y6	S100A1	35.3564	0.000218519	0.699725	0.0166651	AvC_do	n.s.	MvC_do	-0.86305	-0.108337	-0.754713	shared	n.s.
P23368;A0A1W2PPH1;A0A1W2PR68;A0A1W2PQT3;A0A1W2PQH3;A0A1W2PQY8;A0A1W2PQF8;P23368-2;A0A1W2PQ37;A0A1W2PRS2;A0A1W2PRY9;A0A1W2PQH4;A0A1W2PRH1;A0A1W2PPY2	P23368;A0A1W2PPH1;A0A1W2PR68;A0A1W2PQT3;A0A1W2PQH3;A0A1W2PQY8;A0A1W2PQF8;P23368-2;A0A1W2PQ37	ME2	31.9914	2.72903e-07	0.337114	0.00112815	AvC_do	n.s.	MvC_do	-0.73198	-0.14483	-0.58715	shared	n.s.
P23381;P23381-2;G3V277;G3V3P2;G3V227;H0YJP3;G3V4C7;G3V4N8;G3V5W1;G3V3S7;G3V3X0;G3V2Y7;G3V4S4;G3V313;G3V339;G3V2C0;G3V2F2;G3V3R3;G3V4N0;G3V5H5;P78534;G3V4A3;G3V4Q0	P23381;P23381-2	WARS	32.1586	1.29721e-05	0.00302747	0.458241	AvC_do	AvM_do	n.s.	-0.770379	-0.545697	-0.224682	AS specific	changed in MR
P23396;P23396-2;E9PL09;H0YEU2;E9PPU1;F2Z2S8;H0YCJ7;H0YF32;E9PSF4;E9PQ96;E9PJH4;E9PK82;E9PQX2;H0YES8;E9PJN9	P23396;P23396-2;E9PL09;H0YEU2;E9PPU1	RPS3	31.8797	1.4305e-06	0.00136112	0.334482	AvC_do	AvM_do	n.s.	-0.493172	-0.337129	-0.156043	AS specific	changed in MR
P23434;A0A1W2PQV2;H3BUH9;H3BQ30;H3BUG8;H3BNV1;A0A1W2PRH4;A0A1W2PPE4;A0A1W2PNX3;A0A1W2PS29	P23434;A0A1W2PQV2;H3BUH9	GCSH	30.286	0.155963	0.927358	0.342467	n.s.	n.s.	n.s.	-0.634889	0.0510535	-0.685943		n.s.
P23497;P23497-3;P23497-5;P23497-2;E9PHV6;P23497-6;P23497-7;C9JBL0;H7C4B4;H7C1G8	P23497;P23497-3;P23497-5;P23497-2;E9PHV6;P23497-6;P23497-7;C9JBL0	SP100	25.1773	0.483243	0.168282	0.722683	n.s.	n.s.	n.s.	-0.403889	-0.787746	0.383857		n.s.
P23508;P23508-2;D6REY2;A0A096LNU0	P23508;P23508-2;D6REY2;A0A096LNU0	MCC	26.2011	0.632546	0.675592	0.571064	n.s.	n.s.	n.s.	-0.307775	0.291149	-0.598924		n.s.
P23526;P23526-2	P23526;P23526-2	AHCY	31.2879	0.941426	0.000311819	0.00263835	n.s.	AvM_do	MvC_up	0.0109873	-0.452504	0.463492	MR sepcific	changed in MR
P23528;G3V1A4;E9PP50;E9PK25;E9PQB7;E9PS23;E9PLJ3	P23528;G3V1A4;E9PP50;E9PK25;E9PQB7;E9PS23;E9PLJ3	CFL1	32.8581	0.093608	0.00130607	0.270426	n.s.	AvM_up	n.s.	0.186046	0.377614	-0.191568		changed in AS
P23634;P23634-6;P23634-8;P23634-7;Q01814-4;A0A2U3U055;Q01814-7;Q01814-3;A0A2U3TZI3;Q01814-2;H7BZS8	P23634;P23634-6;P23634-8;P23634-7	ATP2B4	31.0489	0.076568	0.107311	0.978487	n.s.	n.s.	n.s.	0.182263	0.175976	0.00628702		n.s.
P23634-4;P23634-2;P23634-5;P23634-3;H0YDG5;H7BY13	P23634-4;P23634-2;P23634-5;P23634-3	ATP2B4	26.9732	0.482135	0.254119	0.829532	n.s.	n.s.	n.s.	0.206297	0.336728	-0.13043		n.s.
P23786	P23786	CPT2	32.4603	0.0129708	0.00613593	0.854623	AvC_do	AvM_do	n.s.	-0.31577	-0.369062	0.0532919	AS specific	changed in MR
P23919;P23919-2;H7C312;H7BZ20;G5E9E9;H7C3A4	P23919;P23919-2;H7C312;H7BZ20	DTYMK	26.922	0.40659	0.471299	0.978487	n.s.	n.s.	n.s.	0.316157	0.294791	0.0213667		n.s.
P23946;P23946-2	P23946;P23946-2	CMA1	27.8739	0.919287	0.00186537	0.0197928	n.s.	AvM_do	MvC_up	-0.065281	-1.6872	1.62192	MR sepcific	changed in MR
P24043;A0A087WX80	P24043;A0A087WX80	LAMA2	34.9597	1.16097e-05	0.000233252	0.836109	AvC_do	AvM_do	n.s.	-0.4278	-0.383606	-0.0441937	AS specific	changed in MR
P24298;H3BU54	P24298	GPT	30.6483	0.100324	0.802984	0.431677	n.s.	n.s.	n.s.	-0.29648	-0.0559524	-0.240528		n.s.
P24310;K7ER11	P24310;K7ER11	COX7A1	33.5841	0.0036431	0.0592797	0.638788	AvC_do	n.s.	n.s.	-0.621629	-0.429861	-0.191768		n.s.
P24534;C9JZW3;F2Z2G2;F8WF65	P24534	EEF1B2	30.5693	0.000248008	0.0156387	0.534649	AvC_do	AvM_do	n.s.	-0.72093	-0.501111	-0.219818	AS specific	changed in MR
P24539;Q5QNZ2	P24539;Q5QNZ2	ATP5PB	35.1311	0.0004785	0.204209	0.161064	AvC_do	n.s.	n.s.	-0.392827	-0.154841	-0.237986		n.s.
P24593;C9JXX4	P24593;C9JXX4	IGFBP5	24.2139	0.123207	0.807497	0.23065	n.s.	n.s.	n.s.	0.58896	-0.115473	0.704433		n.s.
P24666;G5E9R5;P24666-4;P24666-3;F2Z2Q9	P24666;G5E9R5;P24666-4;P24666-3	ACP1	30.0141	0.688193	0.611157	0.957123	n.s.	n.s.	n.s.	-0.0648549	-0.0852608	0.0204059		n.s.
P24752;H0YEL7;P24752-2;E9PRQ6	P24752	ACAT1	36.1056	1.56918e-07	0.0854879	0.00557658	AvC_do	n.s.	MvC_do	-0.587336	-0.19445	-0.392886	shared	n.s.
P24821;E9PC84;P24821-3	P24821;E9PC84;P24821-3	TNC	28.3371	0.301162	0.0336269	0.5116	n.s.	AvM_up	n.s.	1.14448	2.38905	-1.24457		changed in AS
P24844;P24844-2	P24844;P24844-2	MYL9	29.6346	0.738856	0.406786	0.443311	n.s.	n.s.	n.s.	0.149803	-0.35962	0.509423		n.s.
P25098;E9PRV7;Q8N433	P25098	GRK2	24.6956	0.0749707	0.306009	0.747498	n.s.	n.s.	n.s.	0.831279	0.522645	0.308634		n.s.
P25311;C9JEV0;H7BZJ8	P25311;C9JEV0	AZGP1	30.615	0.00453301	0.168282	0.00116528	AvC_up	n.s.	MvC_up	0.824174	-0.43394	1.25811	shared	n.s.
P25325-2	P25325-2	MPST	30.1736	0.0290498	0.10086	0.851403	AvC_do	n.s.	n.s.	-0.660396	-0.531999	-0.128397		n.s.
P25398	P25398	RPS12	29.6377	0.169267	0.911618	0.473738	n.s.	n.s.	n.s.	-0.210722	-0.0211042	-0.189617		n.s.
P25685;P25685-2;M0R080;M0QYT3;M0QXK0;M0R1D6;M0QZD0;M0R128;A0A1B0GX60	P25685;P25685-2;M0R080	DNAJB1	24.7905	0.329989	0.775886	0.420387	n.s.	n.s.	n.s.	-0.472754	0.164598	-0.637352		n.s.
P25686;C9JRD2;P25686-2;C9JXB9;C9JX00;C9J1G2;E7ETU0	P25686;C9JRD2;P25686-2;C9JXB9;C9JX00;C9J1G2;E7ETU0	DNAJB2	27.1199	0.348793	0.895897	0.67225	n.s.	n.s.	n.s.	-0.405891	-0.0697493	-0.336141		n.s.
P25705;P25705-3;K7ENJ4;K7ERX7;K7ESA0	P25705;P25705-3	ATP5F1A	33.7613	0.94977	0.974537	0.965364	n.s.	n.s.	n.s.	0.0172062	-0.00808107	0.0252873		n.s.
P25705-2;K7EK77;K7EJP1;K7EQH4	P25705-2;K7EK77	ATP5F1A	37.8686	1.67697e-06	0.535531	0.00143504	AvC_do	n.s.	MvC_do	-0.380157	-0.0558216	-0.324335	shared	n.s.
P25786;P25786-2;F5GX11;B4DEV8;F5H112	P25786;P25786-2;F5GX11;B4DEV8	PSMA1	30.7168	0.823163	0.082548	0.16069	n.s.	n.s.	n.s.	0.0303581	-0.212106	0.242464		n.s.
P25788-2;P25788;G3V3W4;G3V5N4	P25788-2;P25788	PSMA3	30.5177	0.102566	0.00307465	0.372858	n.s.	AvM_do	n.s.	-0.152211	-0.289422	0.137211		changed in MR
P25789;H0YMZ1;H0YN18;H0YL69;H0YMA1;H0YKT8;P25789-2;H0YMI6;H0YKS0;H0YLC2;H0YMV3;H0YLS6	P25789;H0YMZ1;H0YN18;H0YL69;H0YMA1;H0YKT8;P25789-2;H0YMI6;H0YKS0;H0YLC2	PSMA4	29.917	0.0545358	0.0275144	0.860856	n.s.	AvM_do	n.s.	-0.250153	-0.302659	0.0525062		changed in MR
P25940	P25940	COL5A3	25.9296	7.74998e-06	0.0123132	0.207637	AvC_up	AvM_up	n.s.	2.294	1.32328	0.970714	AS specific	changed in AS
P26022	P26022	PTX3	24.9343	1.64851e-08	0.242585	0.000302705	AvC_do	n.s.	MvC_do	-3.38883	-0.710356	-2.67847	shared	n.s.
P26038	P26038	MSN	33.54	0.018281	0.171814	0.643518	AvC_up	n.s.	n.s.	0.210504	0.131634	0.0788704		n.s.
P26196;Q8IV96	P26196	DDX6	29.3881	0.11239	0.000375582	0.13621	n.s.	AvM_do	n.s.	-0.208944	-0.499269	0.290326		changed in MR
P26232-2;P26232-5;P26232;P26232-3;A0A0A0MRI5;P26232-4;P26232-6;A0A0A0MTJ6;C9IZ88	P26232-2;P26232-5;P26232;P26232-3;A0A0A0MRI5;P26232-4;P26232-6	CTNNA2	29.0912	0.119466	0.804125	0.470792	n.s.	n.s.	n.s.	0.547031	0.107776	0.439255		n.s.
P26368-2;P26368;K7ENG2;K7ELP8	P26368-2;P26368;K7ENG2	U2AF2	27.3797	0.0620736	0.0461613	0.914346	n.s.	AvM_do	n.s.	-0.728206	-0.824214	0.0960082		changed in MR
P26373;P26373-2;J3QSB4;H3BTH3;J3KS98;H3BUK8	P26373;P26373-2;J3QSB4	RPL13	30.5205	0.000500709	0.0557298	0.391829	AvC_do	n.s.	n.s.	-0.542987	-0.317616	-0.225371		n.s.
P26447	P26447	S100A4	30.5206	2.80157e-06	0.348933	0.00462705	AvC_up	n.s.	MvC_up	0.842616	0.181829	0.660787	shared	n.s.
P26583;D6R9A6	P26583;D6R9A6	HMGB2	28.426	0.0210669	0.886807	0.161064	AvC_up	n.s.	n.s.	0.457749	0.0362255	0.421523		n.s.
P26599;P26599-2;P26599-3;A6NLN1;A0A0U1RRM4;A0A0D9SF20;K7EKJ7;K7EK45;K7ES59;A0A087WU68;K7ELW5	P26599;P26599-2;P26599-3;A6NLN1;A0A0U1RRM4	PTBP1	29.728	0.0183727	0.00461686	0.763882	AvC_do	AvM_do	n.s.	-0.715084	-0.907422	0.192338	AS specific	changed in MR
P26639;P26639-2;D6R9F8;D6RCA5;D6RDJ6;D6RBR8;D6RJ97;D6RHV7;D6RCS6	P26639;P26639-2	TARS	29.2334	0.000275483	0.0255735	0.462847	AvC_do	AvM_do	n.s.	-0.435262	-0.281961	-0.153302	AS specific	changed in MR
P26640;A0A140T936;A0A140T954;P26640-2;H0Y426;A2ABF4;A0A0G2JJT9;A0A140T904	P26640;A0A140T936	VARS	29.9815	0.000635652	0.000569991	0.900138	AvC_do	AvM_do	n.s.	-0.450141	-0.488182	0.0380413	AS specific	changed in MR
P26641;P26641-2	P26641;P26641-2	EEF1G	32.1203	0.00551824	0.714638	0.121009	AvC_do	n.s.	n.s.	-0.269509	-0.043265	-0.226244		n.s.
P26678	P26678	PLN	31.7814	3.31403e-05	0.534277	0.000191162	AvC_up	n.s.	MvC_up	0.966568	-0.168027	1.1346	shared	n.s.
P26885;F5H0N4	P26885;F5H0N4	FKBP2	29.8516	0.00396375	0.0215245	0.851005	AvC_do	AvM_do	n.s.	-0.793994	-0.676523	-0.117471	AS specific	changed in MR
P27105;F8VSL7;P27105-2	P27105	STOM	31.1997	0.000114629	3.90264e-09	0.0270013	AvC_do	AvM_do	MvC_up	-0.387208	-0.692198	0.30499	divergent	changed in MR
P27144;D3DQ64	P27144;D3DQ64	AK4	32.9989	0.0658739	0.528368	0.541027	n.s.	n.s.	n.s.	-0.212728	-0.0849701	-0.127758		n.s.
P27169;F8WF42	P27169	PON1	27.7908	0.0311931	0.203555	0.00875801	AvC_up	n.s.	MvC_up	1.19627	-0.766794	1.96306	shared	n.s.
P27338;P27338-2	P27338;P27338-2	MAOB	34.4558	0.0457565	0.0348906	0.918198	AvC_do	AvM_do	n.s.	-0.168569	-0.188778	0.0202091	AS specific	changed in MR
P27348;E9PG15	P27348	YWHAQ	31.3588	2.03333e-05	0.0138664	0.275698	AvC_up	AvM_up	n.s.	0.561959	0.337844	0.224115	AS specific	changed in AS
P27361;E9PQW4;P27361-2;P27361-3;E9PBK7;E9PJF0;B3KR49;H0YEX6;E9PRH7;H0YDH9;K7ELV1;K7EN18;P31152	P27361;E9PQW4;P27361-2;P27361-3;E9PBK7;E9PJF0;B3KR49	MAPK3	27.8429	0.0435854	0.726628	0.0933432	AvC_up	n.s.	n.s.	0.447564	-0.0943615	0.541926		n.s.
P27449	P27449	ATP6V0C	24.7471	0.278653	0.159341	0.867953	n.s.	n.s.	n.s.	-0.547518	-0.73222	0.184703		n.s.
P27694;I3L4R8;I3L2M5;I3L524	P27694	RPA1	27.3872	0.0189501	0.0810685	0.00156962	AvC_up	n.s.	MvC_up	0.484483	-0.385501	0.869984	shared	n.s.
P27695;G3V3M6;G3V5Q1;G3V3C7;A0A0C4DGK8;H7C4A8;G3V5M0;G3V359;G3V5D9;G3V3Y6;G3V2D9	P27695;G3V3M6;G3V5Q1;G3V3C7;A0A0C4DGK8	APEX1	29.1686	0.483336	0.247836	0.821161	n.s.	n.s.	n.s.	-0.144699	-0.239649	0.09495		n.s.
P27797;K7EJB9;K7EL50	P27797	CALR	32.5307	0.438966	0.283783	0.189299	n.s.	n.s.	n.s.	-0.10011	0.140897	-0.241007		n.s.
P27816-5;H7C4C5	P27816-5;H7C4C5	MAP4	24.9328	0.0218065	0.00539551	0.752139	AvC_up	AvM_up	n.s.	0.959011	1.23479	-0.275778	AS specific	changed in AS
P27824;P27824-2;P27824-3;D6RGY2;H0Y9Q7;D6RB85;D6RDP7;D6RAU8;D6RFL1;H0Y9H1;D6RAQ8;D6RHJ3;D6RD16	P27824;P27824-2;P27824-3	CANX	33.8047	0.208062	0.214117	0.980404	n.s.	n.s.	n.s.	0.11715	0.121994	-0.00484401		n.s.
P27986;P27986-4;P27986-5;P27986-2;H0YBC2;E5RJY0;H0YB27;E5RGI8;E5RHI0	P27986;P27986-4;P27986-5;P27986-2	PIK3R1	24.8203	0.011903	0.114855	0.672794	AvC_do	n.s.	n.s.	-0.986745	-0.664246	-0.3225		n.s.
P28062-2	P28062-2	PSMB8	24.7315	0.290572	0.483312	0.899968	n.s.	n.s.	n.s.	-0.43883	-0.322711	-0.116119		n.s.
P28066;P28066-2	P28066;P28066-2	PSMA5	31.1578	0.0121375	0.045859	0.873732	AvC_do	AvM_do	n.s.	-0.329597	-0.280536	-0.0490613	AS specific	changed in MR
P28070	P28070	PSMB4	30.6418	0.678828	0.287534	0.735486	n.s.	n.s.	n.s.	-0.0612653	-0.151078	0.0898126		n.s.
P28072;A0A087X2I4;I3L3X7	P28072;A0A087X2I4	PSMB6	30.1662	0.481046	0.553148	0.38339	n.s.	n.s.	n.s.	-0.109892	0.100342	-0.210235		n.s.
P28074	P28074	PSMB5	30.3316	0.946384	0.634911	0.752139	n.s.	n.s.	n.s.	-0.00927601	0.0610112	-0.0702872		n.s.
P28161;E9PHN6;F6XZQ7;P28161-2;E9PHN7;E9PLF1;E9PGV1	P28161;E9PHN6;F6XZQ7;P28161-2;E9PHN7;E9PLF1	GSTM2	31.958	0.0286532	0.0960782	0.860856	AvC_do	n.s.	n.s.	-0.425788	-0.346797	-0.0789905		n.s.
P28288;P28288-2;P28288-3	P28288;P28288-2	ABCD3	28.4356	4.30862e-06	0.0148662	0.150911	AvC_do	AvM_do	n.s.	-0.808914	-0.440391	-0.368524	AS specific	changed in MR
P28289;P28289-2	P28289;P28289-2	TMOD1	33.5741	0.000937023	0.0537734	0.484095	AvC_do	n.s.	n.s.	-0.306881	-0.19109	-0.115791		n.s.
P28331;P28331-2;P28331-4;P28331-5;B4DJ81;P28331-3;C9JPQ5;F8WDL5	P28331;P28331-2;P28331-4;P28331-5;B4DJ81;P28331-3	NDUFS1	35.8167	0.000543081	0.0421354	0.461997	AvC_do	AvM_do	n.s.	-0.353105	-0.221405	-0.1317	AS specific	changed in MR
P28482;P28482-2	P28482;P28482-2	MAPK1	29.9497	0.0666628	0.170357	0.875139	n.s.	n.s.	n.s.	0.25835	0.206758	0.0515917		n.s.
P28838;P28838-2;H0Y9Q1;H0Y983	P28838;P28838-2	LAP3	31.8468	0.151778	0.0960782	0.893097	n.s.	n.s.	n.s.	-0.139691	-0.169642	0.0299509		n.s.
P28906;Q5JTA5;P28906-2	P28906;Q5JTA5;P28906-2	CD34	27.9002	0.896493	0.328321	0.628665	n.s.	n.s.	n.s.	-0.0457555	-0.295992	0.250236		n.s.
P29144	P29144	TPP2	29.2931	0.167526	0.000871531	0.152453	n.s.	AvM_do	n.s.	-0.271626	-0.685922	0.414296		changed in MR
P29218;P29218-3;H0YBL1;E5RIP7;E5RG13;P29218-2;E5RI82;E5RGY4;E5RG94;E5RHE9;E5RIF4	P29218;P29218-3;H0YBL1;E5RIP7;E5RG13;P29218-2;E5RI82;E5RGY4	IMPA1	30.9082	0.0495228	0.311515	0.0254404	AvC_up	n.s.	MvC_up	0.235838	-0.133818	0.369657	shared	n.s.
P29401;P29401-2;A0A0B4J1R6;E9PFF2;F8W888;F8WAX4	P29401;P29401-2;A0A0B4J1R6	TKT	31.0119	0.62649	0.33613	0.321618	n.s.	n.s.	n.s.	0.0968163	-0.189303	0.286119		n.s.
P29536;P29536-2;Q9BV00	P29536;P29536-2	LMOD1	26.0641	0.100433	0.374684	0.0627368	n.s.	n.s.	n.s.	1.59871	-0.953976	2.55269		n.s.
P29590;P29590-5;P29590-9;P29590-3;P29590-8;P29590-4;P29590-14;P29590-10;H3BT29;H3BVD2	P29590;P29590-5;P29590-9;P29590-3;P29590-8;P29590-4;P29590-14;P29590-10	PML	26.6983	0.831743	0.263649	0.377858	n.s.	n.s.	n.s.	0.10605	-0.513216	0.619266		n.s.
P29622	P29622	SERPINA4	28.343	2.43908e-07	0.560234	6.37878e-06	AvC_up	n.s.	MvC_up	2.51489	-0.318614	2.8335	shared	n.s.
P29692;P29692-4;E9PQZ1;E9PK01;E9PI39;E9PQ49;E9PPR1;E9PL12;E9PMW7;E9PK06;E9PK72;E9PKK3;E9PNW6;E9PJD0	P29692;P29692-4;E9PQZ1;E9PK01;E9PI39	EEF1D	31.7403	0.00828201	6.66983e-05	0.254523	AvC_do	AvM_do	n.s.	-0.238641	-0.401773	0.163131	AS specific	changed in MR
P29692-3;E9PL71;E9PN91	P29692-3;E9PL71	EEF1D	24.5906	0.919175	0.936189	0.988172	n.s.	n.s.	n.s.	-0.0527216	-0.0392786	-0.013443		n.s.
P29728;A0A087X0V5;P29728-2;F8W1C5;P29728-3	P29728;A0A087X0V5;P29728-2	OAS2	25.0663	0.0532967	0.225842	0.767748	n.s.	n.s.	n.s.	1.07459	0.728263	0.346325		n.s.
P29966	P29966	MARCKS	28.4737	0.00025145	0.000356012	0.937968	AvC_up	AvM_up	n.s.	0.930388	0.978576	-0.048188	AS specific	changed in AS
P29972;K7N7A8;P29972-4;P29972-2;P29972-3	P29972;K7N7A8;P29972-4;P29972-2;P29972-3	AQP1	27.8682	0.666068	0.269853	0.727367	n.s.	n.s.	n.s.	-0.114558	-0.280213	0.165656		n.s.
P29992;K7EL62;A0A087WVZ3	P29992;K7EL62	GNA11	30.2338	0.0208291	0.000440919	0.372211	AvC_do	AvM_do	n.s.	-0.351061	-0.578765	0.227704	AS specific	changed in MR
P30038;P30038-2;P30038-3;Q5TF55	P30038;P30038-2;P30038-3	ALDH4A1	32.7351	0.582217	0.854392	0.867866	n.s.	n.s.	n.s.	0.0665702	0.024937	0.0416332		n.s.
P30040;F8VY02;F8W1G0;P30040-2	P30040;F8VY02	ERP29	30.0872	0.00371355	0.870793	0.0594701	AvC_do	n.s.	n.s.	-0.403397	-0.0284076	-0.37499		n.s.
P30041	P30041	PRDX6	34.5978	0.0059345	0.000750687	0.643998	AvC_do	AvM_do	n.s.	-0.269468	-0.356488	0.08702	AS specific	changed in MR
P30043;M0R192;A0A2R8YEP4;A0A2R8Y7Y9;M0QZL1	P30043;M0R192;A0A2R8YEP4;A0A2R8Y7Y9;M0QZL1	BLVRB	32.1598	1.13147e-09	2.35694e-06	0.451988	AvC_up	AvM_up	n.s.	0.883072	0.710676	0.172395	AS specific	changed in AS
P30044;P30044-3;P30044-2;P30044-4	P30044;P30044-3;P30044-2;P30044-4	PRDX5	34.1216	0.000196657	0.00752725	0.622868	AvC_do	AvM_do	n.s.	-0.467822	-0.351929	-0.115892	AS specific	changed in MR
P30046;B5MC82;P30046-2;A6NHG4	P30046;B5MC82;P30046-2;A6NHG4	DDT	31.8608	0.2071	0.602747	0.214026	n.s.	n.s.	n.s.	-0.184756	0.0883913	-0.273147		n.s.
P30048-2;P30048	P30048-2;P30048	PRDX3	34.5152	0.000655861	0.680056	0.0392391	AvC_do	n.s.	MvC_do	-0.300488	-0.0442528	-0.256236	shared	n.s.
P30049;A0A087WTL3	P30049	ATP5F1D	33.9231	0.0430074	0.223899	0.730235	AvC_up	n.s.	n.s.	0.396505	0.258373	0.138131		n.s.
P30050;P30050-2	P30050;P30050-2	RPL12	30.0713	0.000669913	0.0192294	0.632382	AvC_do	AvM_do	n.s.	-0.402677	-0.294664	-0.108013	AS specific	changed in MR
P30084	P30084	ECHS1	34.0965	0.387628	0.731447	0.434125	n.s.	n.s.	n.s.	-0.115672	0.0527292	-0.168401		n.s.
P30085;Q5T0D2;E9PJD2	P30085;Q5T0D2	CMPK1	30.8875	0.648077	0.56559	0.950559	n.s.	n.s.	n.s.	0.073233	0.0961952	-0.0229622		n.s.
P30086	P30086	PEBP1	34.59	0.0355683	0.628069	0.358874	AvC_up	n.s.	n.s.	0.261667	0.0721809	0.189486		n.s.
P30101	P30101	PDIA3	33.3039	0.474355	0.611839	0.946322	n.s.	n.s.	n.s.	0.0789656	0.0615399	0.0174257		n.s.
P30153;B3KQV6;C9J9C1;E9PH38;E9PPI5;E9PHZ6;M0QXG4;M0R0K6;E9PNM7	P30153;B3KQV6	PPP2R1A	33.3516	0.0010678	0.0199085	0.684	AvC_do	AvM_do	n.s.	-0.39597	-0.299521	-0.0964494	AS specific	changed in MR
P30291;P30291-2;E9PRU3;H0YEJ2;E9PQ51;E9PRI3	P30291;P30291-2	WEE1	25.4253	0.939066	0.708756	0.798958	n.s.	n.s.	n.s.	-0.0596886	0.273614	-0.333303		n.s.
P30405;R4GN99;P30405-2;H0Y548	P30405	PPIF	30.899	0.0188338	0.929014	0.138132	AvC_do	n.s.	n.s.	-0.354431	-0.0170816	-0.33735		n.s.
P30419;P30419-2;B7Z8J4;K7EN82;K7EN42	P30419;P30419-2	NMT1	28.7495	0.455539	0.974537	0.662067	n.s.	n.s.	n.s.	-0.273988	0.0129859	-0.286974		n.s.
P30479	P30479	HLA-B	25.4798	0.671767	0.341705	0.351004	n.s.	n.s.	n.s.	0.270155	-0.589256	0.859411		n.s.
P30481;A0A140T9Y5;A0A140T997;A0A140TA14;A0A140TA11;A0A140T9H3;A0A140T9A9	P30481;A0A140T9Y5;A0A140T997;A0A140TA14;A0A140TA11;A0A140T9H3;A0A140T9A9	HLA-B	25.1635	0.927529	0.855708	0.883049	n.s.	n.s.	n.s.	-0.0508928	0.0995132	-0.150406		n.s.
P30508;A0A140T912;A0A1W2PRZ0;A0A140T937;A0A140T930;Q29960-2;Q29960;A0A140T9Z4	P30508;A0A140T912;A0A1W2PRZ0;A0A140T937;A0A140T930;Q29960-2;Q29960	HLA-C	25.6152	0.59919	0.111096	0.124697	n.s.	n.s.	n.s.	-0.249832	0.727161	-0.976994		n.s.
P30519;A0A087WT44;P30519-2;I3L159;I3L1F5;I3L4P8;A0A1B0GXH0;I3L463;I3L276;I3L1Y2	P30519;A0A087WT44;P30519-2;I3L159;I3L1F5	HMOX2	29.6599	2.49548e-06	0.00273333	0.291459	AvC_do	AvM_do	n.s.	-1.07922	-0.706482	-0.372736	AS specific	changed in MR
P30533;A0A3B3IRQ7;D6REW6	P30533;A0A3B3IRQ7	LRPAP1	29.8359	0.940501	0.167428	0.334482	n.s.	n.s.	n.s.	-0.0153491	0.23527	-0.250619		n.s.
P30536;B1AH87	P30536;B1AH87	TSPO	29.1268	0.0725592	1.30889e-05	0.0255565	n.s.	AvM_up	MvC_do	0.578561	1.56329	-0.98473	MR sepcific	changed in AS
P30622;P30622-1;F5H6A0;A0A3B3ITA2;F5H1T5;A0A3B3IS27;F5H270;F5H367	P30622;P30622-1;F5H6A0	CLIP1	30.1512	0.274928	0.712187	0.735486	n.s.	n.s.	n.s.	-0.36779	-0.144089	-0.223701		n.s.
P30711;A0A0G2JRQ5;P30711-2	P30711;A0A0G2JRQ5	GSTT1	29.6119	0.913588	0.213073	0.371859	n.s.	n.s.	n.s.	-0.12012	1.14668	-1.2668		n.s.
P30740;P30740-2;C9J7N5;O75830	P30740;P30740-2	SERPINB1	31.0532	0.789525	0.381686	0.749097	n.s.	n.s.	n.s.	-0.0389156	-0.120414	0.0814984		n.s.
P30837;A0A0U1RQK9	P30837	ALDH1B1	30.8458	0.0264856	0.785825	0.0776346	AvC_up	n.s.	n.s.	0.883386	-0.136062	1.01945		n.s.
P31040;D6RFM5;P31040-2;A0A087X1I3;P31040-3;H0Y8X1;H0Y8S2	P31040;D6RFM5;P31040-2;A0A087X1I3;P31040-3	SDHA	35.0669	0.00627912	0.95321	0.0483827	AvC_do	n.s.	MvC_do	-0.3031	0.00816706	-0.311267	shared	n.s.
P31146;H3BRY3;H3BTU6;H3BRJ0;H3BNA2;H3BU76;H3BSL1	P31146;H3BRY3;H3BTU6	CORO1A	26.2132	0.479039	0.688918	0.904075	n.s.	n.s.	n.s.	-0.375999	-0.238518	-0.137481		n.s.
P31150;G5E9U5	P31150	GDI1	32.0742	0.979734	0.902018	0.937377	n.s.	n.s.	n.s.	0.00326508	-0.0159062	0.0191713		n.s.
P31153;P31153-2;Q00266	P31153;P31153-2	MAT2A	29.5935	0.239238	0.0687605	0.724894	n.s.	n.s.	n.s.	-0.177262	-0.28192	0.104658		n.s.
P31323	P31323	PRKAR2B	29.0462	0.180692	0.13121	0.916884	n.s.	n.s.	n.s.	-0.324074	-0.381663	0.0575892		n.s.
P31689;P31689-2	P31689;P31689-2	DNAJA1	27.6879	0.000539939	0.374684	0.0904705	AvC_do	n.s.	n.s.	-1.17406	-0.337207	-0.836849		n.s.
P31749;P31749-2;G3V3X1;G3V4I6;A0A087WY56;G3V2I6;J3KTP4;J3KTC6	P31749;P31749-2	AKT1	26.0264	0.116743	0.399284	0.760796	n.s.	n.s.	n.s.	0.490019	0.292786	0.197233		n.s.
P31751;P31751-2;J3QLS6;C9JHS6;M0QZK3;J3KRI8;A0A1B0GXA2;A8MX96;E7EVP8;C9JIJ1;C9JC83;A0A0A0MRF1;J3KSY8;C9J258;C9JIF6	P31751;P31751-2	AKT2	25.2876	0.025433	0.622032	0.311737	AvC_up	n.s.	n.s.	1.11939	0.295972	0.823414		n.s.
P31930;F8WEF1;F8WER5	P31930	UQCRC1	35.484	0.000164376	0.910461	0.0030886	AvC_do	n.s.	MvC_do	-0.469146	0.0179199	-0.487066	shared	n.s.
P31937;H7BZL2	P31937	HIBADH	33.1878	1.08647e-05	0.00941731	0.267013	AvC_do	AvM_do	n.s.	-0.730926	-0.445333	-0.285593	AS specific	changed in MR
P31939;P31939-2;H7C1S2;C9JLK0;F8WEF0	P31939;P31939-2	ATIC	31.321	0.098175	0.208679	0.895384	n.s.	n.s.	n.s.	-0.230784	-0.188201	-0.0425824		n.s.
P31942-2;P31942;P31942-3;P31942-4;P31942-6;P31942-5	P31942-2;P31942;P31942-3;P31942-4	HNRNPH3	29.6844	0.399961	0.0364065	0.0232472	n.s.	AvM_up	MvC_do	-0.114738	0.283703	-0.398441	MR sepcific	changed in AS
P31946-2;P31946;Q4VY20;A0A0J9YWE8;A0A0J9YWZ2	P31946-2;P31946	YWHAB	31.5477	0.00312762	0.935333	0.0437303	AvC_up	n.s.	MvC_up	0.311653	0.0108186	0.300834	shared	n.s.
P31947-2;P31947	P31947-2;P31947	SFN	28.8917	0.787415	0.0877106	0.155386	n.s.	n.s.	n.s.	-0.228582	1.30037	-1.52895		n.s.
P31948;P31948-3;F5H783;F5GXD8;H0YGI8	P31948;P31948-3	STIP1	31.6005	0.0761728	0.0508352	0.900138	n.s.	n.s.	n.s.	-0.14912	-0.173299	0.0241794		n.s.
P31949	P31949	S100A11	30.0245	0.288318	0.00307868	0.184771	n.s.	AvM_up	n.s.	0.255769	0.723876	-0.468107		changed in AS
P32119;A6NIW5	P32119	PRDX2	34.944	0.0852541	0.642619	0.508217	n.s.	n.s.	n.s.	0.182958	0.0587302	0.124228		n.s.
P32189-1;P32189-4;P32189-2;P32189;Q14409;A6NP46;F8WC39;F8WDA9;F8WBI8;H7C2A0;F8WF44;H7BYD2	P32189-1;P32189-4;P32189-2;P32189;Q14409	GK	29.8617	0.0423369	0.206997	0.748199	AvC_do	n.s.	n.s.	-0.349475	-0.235182	-0.114293		n.s.
P32418;P32418-5;P32418-4;P32418-3;E7EV41;E9PCL8	P32418;P32418-5;P32418-4;P32418-3;E7EV41	SLC8A1	31.1654	0.0560954	0.903775	0.172417	n.s.	n.s.	n.s.	-0.246875	0.0200377	-0.266913		n.s.
P32455;Q9H0R5-4	P32455	GBP1	27.6757	0.119498	0.539527	0.654387	n.s.	n.s.	n.s.	-0.664868	-0.302627	-0.36224		n.s.
P32969;A0A2R8Y5Y7;E7ESE0;D6RAN4;H0Y9V9;H0Y9R4	P32969;A0A2R8Y5Y7;E7ESE0;D6RAN4;H0Y9V9	RPL9	30.2003	0.0245507	0.0409479	0.978487	AvC_do	AvM_do	n.s.	-0.657788	-0.639968	-0.01782	AS specific	changed in MR
P33121;E7EPM6;P33121-2;P33121-3;D6RER0;D6RG07	P33121;E7EPM6;P33121-2;P33121-3;D6RER0	ACSL1	34.6	1.01179e-05	0.0254871	0.152811	AvC_do	AvM_do	n.s.	-0.52158	-0.273421	-0.248159	AS specific	changed in MR
P33151;P33151-2;I3L1J2;H3BPG1;B4DTR2;H3BR64;H3BR11	P33151;P33151-2;I3L1J2	CDH5	26.9632	0.00221136	0.00502306	0.971792	AvC_do	AvM_do	n.s.	-0.860834	-0.836126	-0.0247087	AS specific	changed in MR
P33176;C9JWB9	P33176	KIF5B	31.3297	0.0321477	0.738041	0.275698	AvC_up	n.s.	n.s.	0.169339	0.0325981	0.136741		n.s.
P33316;H0YNW5;P33316-2;A0A0C4DGL3;H0YKC5;H0YKI0;H0YMM5;H0YNJ9	P33316;H0YNW5;P33316-2;A0A0C4DGL3;H0YKC5;H0YKI0;H0YMM5;H0YNJ9	DUT	27.0592	0.302815	0.515992	0.893097	n.s.	n.s.	n.s.	0.223953	0.157816	0.0661365		n.s.
P34096	P34096	RNASE4	24.9242	0.00147232	0.549323	0.0904705	AvC_up	n.s.	n.s.	1.59556	0.354076	1.24149		n.s.
P34897-3;P34897;P34897-2;H0YIZ0;G3V5L0;G3V4W5;G3V540;G3V2W0;G3V241;G3V3Y8;G3V4T0;G3V4X0;G3V2E4;G3V2Y1;G3V3C6	P34897-3;P34897;P34897-2;H0YIZ0	SHMT2	28.7696	1.0118e-05	0.564283	0.0042333	AvC_do	n.s.	MvC_do	-0.843054	-0.126932	-0.716122	shared	n.s.
P34913;E5RFU2;E5RFH6;H0YAW7;E5RI53	P34913;E5RFU2;E5RFH6	EPHX2	29.6439	0.758688	0.207662	0.584941	n.s.	n.s.	n.s.	-0.143426	-0.545726	0.4023		n.s.
P34932;A0A087WYC1;A0A087WTS8;P34932-2	P34932;A0A087WYC1	HSPA4	31.6771	0.146719	0.0112412	0.499272	n.s.	AvM_up	n.s.	0.136835	0.248159	-0.111324		changed in AS
P34949;H3BPB8;H3BPP3;H3BP57;H3BUZ9;F5GX71;P34949-2;H3BMZ9;H3BT48;H3BPM5;H3BU66;H3BQX0;H3BNY8;H3BT46;H3BPU7;H3BN01;H3BUG1;B4DYB8	P34949;H3BPB8;H3BPP3;H3BP57;H3BUZ9;F5GX71;P34949-2;H3BMZ9;H3BT48;H3BPM5	MPI	30.641	0.335569	0.544908	0.896854	n.s.	n.s.	n.s.	-0.213227	-0.149583	-0.0636438		n.s.
P35052;H7C410;H7C024;H7BZL4;P35052-2;H7BZE9;C9J4Y6	P35052;H7C410;H7C024;H7BZL4	GPC1	30.0339	0.424553	0.990888	0.648736	n.s.	n.s.	n.s.	0.176867	-0.00306993	0.179936		n.s.
P35080;C9J712;C9J2N0	P35080;C9J712;C9J2N0	PFN2	24.6778	0.067617	0.449686	0.601094	n.s.	n.s.	n.s.	-0.7548	-0.355038	-0.399762		n.s.
P35221;P35221-2;G3XAM7;P35221-3;E5RIB1;E5RG03;E5RGY6;E5RHV7;E5RJ41;E5RIE0;E5RJL0;E5RGY7;E5RJP7;E5RGD2;H0YBB8;E5RFM3;E5RFK9;E5RFM5;E5RFG3;E5RJZ2;E5RIT8;A0A087WZL6;E5RGU3;E5RHJ5;E5RGG4;E5RJ43;E5RGS1;B9A010;REV__Q9P2T0-2;REV__Q9P2T0	P35221;P35221-2;G3XAM7;P35221-3	CTNNA1	33.5593	0.00138177	0.0480978	0.551682	AvC_up	AvM_up	n.s.	0.387697	0.25596	0.131737	AS specific	changed in AS
P35232;C9JW96;C9JZ20;E7ESE2;E9PCW0;P35232-2;D6RBK0	P35232;C9JW96;C9JZ20;E7ESE2;E9PCW0;P35232-2	PHB	34.0558	0.0446588	0.841954	0.265595	AvC_do	n.s.	n.s.	-0.164856	-0.0204817	-0.144374		n.s.
P35237;A0A2R8YDD0;A0A2R8Y517;A0A2R8Y5S1;A0A2R8Y6N4	P35237	SERPINB6	32.5761	0.575228	0.859886	0.860856	n.s.	n.s.	n.s.	-0.0708517	-0.0250511	-0.0458006		n.s.
P35241;A0A2R8Y5S7;P35241-5;A0A2R8Y7M3;P35241-4;P35241-2;P35241-3;A0A2R8Y5P0;A0A2R8Y4H6;E9PKN5;E9PNP4	P35241;A0A2R8Y5S7;P35241-5;A0A2R8Y7M3;P35241-4	RDX	30.3393	0.855639	0.882907	0.858638	n.s.	n.s.	n.s.	0.0200827	-0.0169137	0.0369963		n.s.
P35250;P35250-2;A0A087WVY3;H7C5S7;H7C5P1;H7C5Q7;F8WC37;H7C5A0;H7C5G4;H7C5P4	P35250;P35250-2;A0A087WVY3	RFC2	25.5703	0.82977	0.818864	0.803073	n.s.	n.s.	n.s.	-0.123758	0.138158	-0.261915		n.s.
P35268;K7ERI7;K7EJT5;K7EP65;K7EKS7;K7ELC4;K7EMH1	P35268;K7ERI7;K7EJT5;K7EP65;K7EKS7;K7ELC4;K7EMH1	RPL22	29.3807	0.0100971	0.0796235	0.738715	AvC_do	n.s.	n.s.	-0.663837	-0.485829	-0.178008		n.s.
P35270	P35270	SPR	31.3966	0.233724	0.232129	0.978487	n.s.	n.s.	n.s.	-0.181476	-0.191455	0.0099791		n.s.
P35443;E7ES19	P35443;E7ES19	THBS4	31.613	9.88039e-06	0.000289942	0.787314	AvC_up	AvM_up	n.s.	1.17227	1.0218	0.150466	AS specific	changed in AS
P35555;H0YND0;F6U495;H0YN80	P35555	FBN1	32.5893	0.000247723	0.18737	0.000112808	AvC_up	n.s.	MvC_up	0.74273	-0.287457	1.03019	shared	n.s.
P35573;P35573-2;P35573-3;A0A1C7CYW1	P35573;P35573-2;P35573-3	AGL	33.6252	0.2883	0.769634	0.377339	n.s.	n.s.	n.s.	-0.153983	0.0508072	-0.204791		n.s.
P35579;P35579-2;Q5BKV1;B1AH99	P35579;P35579-2	MYH9	34.7456	0.22115	0.503893	0.828181	n.s.	n.s.	n.s.	-0.177263	-0.109141	-0.0681221		n.s.
P35580-2;P35580-4	P35580-2;P35580-4	MYH10	32.6595	3.20522e-06	0.830688	0.000118759	AvC_up	n.s.	MvC_up	1.33319	-0.0747802	1.40797	shared	n.s.
P35606-2;P35606;H0YAC7;D6R997;D6RBZ7;D6RCL6;D6RBG7;D6RBT6;H0Y938	P35606-2;P35606	COPB2	29.7225	0.00117558	0.0145811	0.759221	AvC_do	AvM_do	n.s.	-0.514493	-0.411962	-0.102531	AS specific	changed in MR
P35609	P35609	ACTN2	38.6673	0.817965	0.864258	0.827369	n.s.	n.s.	n.s.	-0.028437	0.0219991	-0.0504361		n.s.
P35611-2;P35611-6	P35611-2;P35611-6	ADD1	29.8069	0.0322874	0.046304	0.00135618	AvC_up	AvM_do	MvC_up	0.290483	-0.288355	0.578838	shared	changed in MR
P35613-2;P35613;P35613-4;A0A087WUV8;A0A087X2B5;I3L192;A0A2R8YDZ0	P35613-2;P35613;P35613-4;A0A087WUV8;A0A087X2B5;I3L192	BSG	31.293	0.943	0.114265	0.25892	n.s.	n.s.	n.s.	0.0120438	-0.222203	0.234246		n.s.
P35625	P35625	TIMP3	29.1163	3.9591e-05	0.67344	0.00647378	AvC_up	n.s.	MvC_up	3.14994	0.389015	2.76093	shared	n.s.
P35637-2;P35637;H3BPE7;H3BNZ4	P35637-2;P35637;H3BPE7	FUS	26.5763	0.96436	0.139703	0.310998	n.s.	n.s.	n.s.	0.0178605	-0.502407	0.520267		n.s.
P35659;H0Y8X0;B4DFG0;P35659-2;D6RDA2;D6R9L5;H0Y993	P35659;H0Y8X0;B4DFG0;P35659-2;D6RDA2	DEK	26.4453	0.0525575	0.108621	0.922732	n.s.	n.s.	n.s.	-0.697759	-0.615946	-0.0818134		n.s.
P35749	P35749	MYH11	33.6048	0.0307895	0.202062	0.00850941	AvC_up	n.s.	MvC_up	1.04379	-0.670025	1.71382	shared	n.s.
P35754	P35754	GLRX	30.8898	0.504277	0.303254	0.860045	n.s.	n.s.	n.s.	-0.196691	-0.307032	0.110341		n.s.
P35813;P35813-3;P35813-2;E9PKB5;E9PJN3;E9PL75	P35813;P35813-3;P35813-2	PPM1A	29.0473	0.00691014	0.994675	0.0584504	AvC_up	n.s.	n.s.	0.371559	-0.00129599	0.372855		n.s.
P35858-2;P35858	P35858-2;P35858	IGFALS	26.8747	0.0401193	0.111096	0.00482208	AvC_up	n.s.	MvC_up	1.25686	-1.04412	2.30098	shared	n.s.
P35914;P35914-3;P35914-2;H0Y2L7;G5E9S9;B7Z4D4	P35914;P35914-3;P35914-2	HMGCL	29.008	0.000807239	0.0572806	0.447884	AvC_do	n.s.	n.s.	-0.612741	-0.371291	-0.24145		n.s.
P35998;A0A1W2PQS1;C9JLS9	P35998;A0A1W2PQS1	PSMC2	30.7292	0.987332	0.0135563	0.0723361	n.s.	AvM_do	n.s.	-0.00229523	-0.261331	0.259036		changed in MR
P36269;P36269-3;P36269-2;H7C1X2;C9JU68	P36269;P36269-3;P36269-2	GGT5	28.2034	0.673596	0.0401524	0.284705	n.s.	AvM_do	n.s.	-0.145423	-0.659503	0.51408		changed in MR
P36404;V9GYD0;P36404-2	P36404;V9GYD0;P36404-2	ARL2	27.0637	0.115335	0.0550464	0.843367	n.s.	n.s.	n.s.	-0.40223	-0.513647	0.111417		n.s.
P36405	P36405	ARL3	29.131	0.141979	0.383398	0.81165	n.s.	n.s.	n.s.	-0.378022	-0.247232	-0.130789		n.s.
P36507;G5E9C7;M0R1B6	P36507;G5E9C7	MAP2K2	28.7396	0.0186492	0.00195528	0.607803	AvC_do	AvM_do	n.s.	-0.443251	-0.623468	0.180218	AS specific	changed in MR
P36542-2	P36542-2	ATP5F1C	35.1151	0.00164634	0.466217	0.124669	AvC_do	n.s.	n.s.	-0.368391	-0.0984368	-0.269954		n.s.
P36543;P36543-3;P36543-2;C9J8H1	P36543;P36543-3;P36543-2;C9J8H1	ATP6V1E1	28.5608	0.0097593	0.000776846	0.575236	AvC_do	AvM_do	n.s.	-0.408022	-0.57255	0.164528	AS specific	changed in MR
P36551;P36551-2;H0YA22;D6RER6	P36551	CPOX	28.0414	0.787415	0.296066	0.668636	n.s.	n.s.	n.s.	-0.097955	-0.352414	0.254459		n.s.
P36578;H3BM89;H3BTP7;H3BU31	P36578;H3BM89	RPL4	31.244	0.0712425	0.00740533	0.584941	n.s.	AvM_do	n.s.	-0.279911	-0.435153	0.155242		changed in MR
P36871;A0A3B3ITK7;P36871-3	P36871;A0A3B3ITK7;P36871-3	PGM1	34.5796	0.303945	0.760933	0.735486	n.s.	n.s.	n.s.	0.111717	0.0394457	0.0722715		n.s.
P36955;I3L4N7;I3L107;I3L4F9;I3L4Z0;CON__Q95121;I3L2R7;I3L3Z3;I3L425;I3L1U4	P36955	SERPINF1	30.6055	0.00148927	0.690909	0.00645889	AvC_up	n.s.	MvC_up	1.06134	-0.161848	1.22319	shared	n.s.
P36957;Q86SW4;H0YJF9;G3V3F0	P36957;Q86SW4	DLST	34.6852	0.445197	0.096253	0.0706753	n.s.	n.s.	n.s.	-0.0733617	0.157647	-0.231009		n.s.
P37108;H0YLA2	P37108;H0YLA2	SRP14	28.334	0.907348	0.602794	0.696565	n.s.	n.s.	n.s.	-0.0255818	0.105127	-0.130709		n.s.
P37198;M0QXN5;M0QX10;M0QYY0;M0QX13;M0QZL5;M0R1S1;M0QX64;M0R302	P37198;M0QXN5	NUP62	25.6769	0.265481	0.310921	0.127703	n.s.	n.s.	n.s.	0.342653	-0.33144	0.674093		n.s.
P37235;E9PC71;C9JW46	P37235;E9PC71	HPCAL1	26.3176	0.0339797	0.0529806	0.979593	AvC_do	n.s.	n.s.	-0.814855	-0.792853	-0.0220017		n.s.
P37802;P37802-2;X6RJP6	P37802;P37802-2;X6RJP6	TAGLN2	32.246	0.23126	0.227396	0.0780102	n.s.	n.s.	n.s.	0.1813	-0.192372	0.373672		n.s.
P37837;F2Z393;E9PKI8;E9PM01	P37837;F2Z393	TALDO1	30.8351	0.067617	0.00270946	0.430796	n.s.	AvM_do	n.s.	-0.218354	-0.378975	0.16062		changed in MR
P38117;P38117-2;M0QY67	P38117;P38117-2;M0QY67	ETFB	34.6062	0.014622	0.0909131	0.764278	AvC_do	n.s.	n.s.	-0.258179	-0.191138	-0.0670408		n.s.
P38159;P38159-2;H3BT71;H0Y6E7;H3BUY5;H3BR27;P38159-3;H3BNC1;O75526;Q8IZ40;Q8N7X1	P38159;P38159-2;H3BT71;H0Y6E7	RBMX	28.8749	0.122715	0.936189	0.38162	n.s.	n.s.	n.s.	-0.194426	-0.0122887	-0.182138		n.s.
P38606-2;P38606;C9JA17;C9JVW8	P38606-2;P38606	ATP6V1A	29.8355	0.0235942	0.00437442	0.704892	AvC_do	AvM_do	n.s.	-0.369578	-0.493053	0.123475	AS specific	changed in MR
P38646;H0YBG6;A0A3B3ITI4;D6RJI2;H0Y8S0;D6RA73;A0A3B3ITN1	P38646	HSPA9	34.7719	0.000477825	0.0240567	0.545007	AvC_do	AvM_do	n.s.	-0.250681	-0.171626	-0.0790547	AS specific	changed in MR
P38919;I3L3H2	P38919;I3L3H2	EIF4A3	28.8191	0.00168118	0.00133806	0.897007	AvC_do	AvM_do	n.s.	-0.537824	-0.589541	0.0517175	AS specific	changed in MR
P39019;A0A075B6E2;M0R2L9;M0QXK4;M0QYF7	P39019	RPS19	30.6119	0.000112326	0.126748	0.132128	AvC_do	n.s.	n.s.	-0.431698	-0.181445	-0.250253		n.s.
P39023;G5E9G0;H7C422;H7C3M2;B5MCW2;F8WCR1	P39023;G5E9G0;H7C422;H7C3M2;B5MCW2	RPL3	28.5499	0.0577054	0.902018	0.270151	n.s.	n.s.	n.s.	-0.723919	-0.0602646	-0.663654		n.s.
P39060-2;P39060-1;P39060;H7BXV5;H7C457	P39060-2;P39060-1;P39060;H7BXV5;H7C457	COL18A1	31.9815	0.000208227	0.95679	0.00460523	AvC_up	n.s.	MvC_up	0.708674	-0.0128947	0.721568	shared	n.s.
P39687;H0YN26;H7BZ09;O95626	P39687;H0YN26	ANP32A	30.1108	0.993555	0.0118125	0.0627368	n.s.	AvM_do	n.s.	-0.00159197	-0.339315	0.337723		changed in MR
P40121;P40121-2;E7ENU9;B8ZZL6;H7C0X8	P40121;P40121-2;E7ENU9	CAPG	25.4021	0.963547	0.0219355	0.0869594	n.s.	AvM_up	n.s.	-0.0343055	1.43981	-1.47412		changed in AS
P40123;E9PDI2;A0A087WZ15;A0A087X0J3;P40123-2;B7Z385;P40123-3;F8WDB9;F8WEW0	P40123;E9PDI2;A0A087WZ15;A0A087X0J3;P40123-2;B7Z385	CAP2	31.753	0.208904	0.615414	0.735486	n.s.	n.s.	n.s.	0.106849	0.0494675	0.0573813		n.s.
P40227;P40227-2	P40227;P40227-2	CCT6A	31.8824	5.73567e-08	1.5095e-06	0.906699	AvC_do	AvM_do	n.s.	-0.650636	-0.620655	-0.0299804	AS specific	changed in MR
P40261	P40261	NNMT	24.1546	0.76728	0.846554	0.784984	n.s.	n.s.	n.s.	-0.151722	0.105827	-0.257549		n.s.
P40306;J3QQN1;J3QL48	P40306	PSMB10	24.4469	0.000642933	0.242586	0.15669	AvC_do	n.s.	n.s.	-1.41301	-0.527867	-0.885141		n.s.
P40429;M0QYS1;Q8J015;Q6NVV1;M0QZU1;A0A096LPE0	P40429;M0QYS1;Q8J015	RPL13A	29.4339	0.000771629	0.0554654	0.448827	AvC_do	n.s.	n.s.	-0.453179	-0.275522	-0.177657		n.s.
P40616-2;P40616;F8VYN9;B4DZG7;F8VP99;F8W1Z8;F8VP63	P40616-2;P40616;F8VYN9;B4DZG7	ARL1	28.6669	0.121196	0.139202	0.995161	n.s.	n.s.	n.s.	-0.451591	-0.454879	0.003288		n.s.
P40763;P40763-2;G8JLH9	P40763;P40763-2;G8JLH9	STAT3	30.5168	0.000617734	0.0165208	0.643998	AvC_do	AvM_do	n.s.	-0.755119	-0.560458	-0.194661	AS specific	changed in MR
P40855;Q5QNY5;P40855-5;B7Z8B3;H0YJ60;E9PS71;E9PPB4	P40855;Q5QNY5;P40855-5;B7Z8B3	PEX19	25.1109	0.306596	0.208072	0.898113	n.s.	n.s.	n.s.	-0.459307	-0.587144	0.127838		n.s.
P40925;P40925-3;B9A041;C9JF79;B8ZZ51;C9JLV6;C9IZI0	P40925;P40925-3;B9A041;C9JF79;B8ZZ51	MDH1	35.9468	0.0255784	0.27672	0.576418	AvC_do	n.s.	n.s.	-0.258429	-0.138706	-0.119723		n.s.
P40926;P40926-2;G3XAL0;U3KQ63	P40926;P40926-2;G3XAL0	MDH2	36.3662	9.26926e-08	0.00275589	0.0896716	AvC_do	AvM_do	n.s.	-0.547378	-0.308317	-0.239061	AS specific	changed in MR
P41091;Q2VIR3;Q2VIR3-2;H7BZU1	P41091;Q2VIR3;Q2VIR3-2	EIF2S3	28.9714	0.060631	0.497423	0.545175	n.s.	n.s.	n.s.	-0.378687	-0.158252	-0.220435		n.s.
P41218;H0Y6P3	P41218	MNDA	24.7744	0.570168	0.52438	0.966355	n.s.	n.s.	n.s.	-0.341851	-0.404461	0.0626093		n.s.
P41219;P41219-2;H7C5W5	P41219;P41219-2	PRPH	26.2763	0.230689	0.000672591	0.100637	n.s.	AvM_do	n.s.	-0.730831	-2.15537	1.42454		changed in MR
P41222;Q5SQ11	P41222;Q5SQ11	PTGDS	29.8836	0.0597806	0.163691	0.862804	n.s.	n.s.	n.s.	-0.443241	-0.350917	-0.0923235		n.s.
P41227;P41227-2;F8W808;A8MWP7;C9JN83;C9JW55;Q9BSU3;H0Y8T0	P41227;P41227-2;F8W808;A8MWP7;C9JN83;C9JW55	NAA10	25.9444	0.518778	0.263152	0.211274	n.s.	n.s.	n.s.	-0.196849	0.341069	-0.537918		n.s.
P41247;P41247-2;C9IZF6	P41247;P41247-2;C9IZF6	PNPLA4	24.9302	0.282702	0.326234	0.988172	n.s.	n.s.	n.s.	-0.488846	-0.474296	-0.0145508		n.s.
P41250;H7C443;F8WCK4	P41250	GARS	29.9225	0.00949146	0.00399051	0.834464	AvC_do	AvM_do	n.s.	-0.304811	-0.360143	0.0553324	AS specific	changed in MR
P41252;A0A0A0MSX9;J3KR24;Q5TCD1;Q5TCC6	P41252;A0A0A0MSX9;J3KR24	IARS	29.3692	0.000419121	0.111731	0.24306	AvC_do	n.s.	n.s.	-0.578925	-0.279175	-0.29975		n.s.
P41567;K7EM18	P41567;K7EM18	EIF1	29.6723	0.00842866	0.0801301	0.704892	AvC_do	n.s.	n.s.	-0.481743	-0.343424	-0.138318		n.s.
P42025	P42025	ACTR1B	29.8685	0.0350476	0.275999	0.63223	AvC_do	n.s.	n.s.	-0.369644	-0.209821	-0.159822		n.s.
P42126;P42126-2;Q96DC0;H3BS70	P42126;P42126-2;Q96DC0;H3BS70	ECI1	33.2803	0.00515752	0.282289	0.328734	AvC_do	n.s.	n.s.	-0.37119	-0.15786	-0.21333		n.s.
P42167	P42167	TMPO	28.6754	0.109412	0.0582546	0.00658274	n.s.	n.s.	MvC_up	0.26809	-0.332446	0.600536		n.s.
P42224;P42224-2;J3KPM9;E7EPD2;D2KFR9;E7ENM1;E9PH66;H7BZB5;H7BZ88	P42224;P42224-2;J3KPM9	STAT1	28.6192	0.697225	0.258363	0.685927	n.s.	n.s.	n.s.	-0.133574	-0.370018	0.236444		n.s.
P42336;A0A2R8Y2F6;C9JAM9	P42336;A0A2R8Y2F6	PIK3CA	26.0414	0.24518	0.0843795	0.027763	n.s.	n.s.	MvC_up	0.870644	-1.33353	2.20417		n.s.
P42345;B1AKP8;B1AKQ2	P42345	MTOR	26.7655	0.419911	0.00769145	0.207637	n.s.	AvM_do	n.s.	-0.2834	-0.918399	0.634999		changed in MR
P42356;P42356-2;A8MTF1;A4QPH2-4;A4QPH2;A4QPH2-2;Q8N8J0	P42356	PI4KA	26.2229	0.43702	0.0987625	0.625771	n.s.	n.s.	n.s.	-0.370458	-0.777255	0.406797		n.s.
P42566;P42566-2	P42566;P42566-2	EPS15	26.4175	0.0891225	0.0365767	0.818613	n.s.	AvM_do	n.s.	-0.807678	-1.04427	0.236597		changed in MR
P42677	P42677	RPS27	27.9934	0.00105032	0.00580418	0.880335	AvC_do	AvM_do	n.s.	-1.28626	-1.14609	-0.140172	AS specific	changed in MR
P42704;A0A0C4DG06;B8ZZ38;C9JCA9;H7C3W8	P42704	LRPPRC	33.9141	8.41693e-05	0.000467366	0.937377	AvC_do	AvM_do	n.s.	-0.340741	-0.324045	-0.0166967	AS specific	changed in MR
P42765;A0A0B4J2A4	P42765;A0A0B4J2A4	ACAA2	35.0259	0.00104653	0.311275	0.15289	AvC_do	n.s.	n.s.	-0.437284	-0.149678	-0.287606		n.s.
P42766;F2Z388	P42766;F2Z388	RPL35	29.018	0.206526	0.557007	0.776155	n.s.	n.s.	n.s.	-0.228669	-0.12164	-0.107029		n.s.
P42785;P42785-2	P42785;P42785-2	PRCP	25.9396	0.00188721	0.00421595	0.977368	AvC_do	AvM_do	n.s.	-1.11284	-1.08605	-0.0267915	AS specific	changed in MR
P42892-4;B4DKB2;A0A3B3ISF9;P42892-3;P42892-2;P42892;E9PJG1;E9PHZ1	P42892-4;B4DKB2;A0A3B3ISF9;P42892-3;P42892-2;P42892	ECE1	24.9101	0.190885	0.651617	0.684	n.s.	n.s.	n.s.	0.71087	0.28979	0.42108		n.s.
P43003-2;P43003;A0A087X0U3;A0A087WT87;E7EUS7;E7EUV6;M0QY32;M0R106;P48664-2	P43003-2;P43003;A0A087X0U3;A0A087WT87	SLC1A3	26.2608	0.0135345	0.191008	0.571064	AvC_do	n.s.	n.s.	-0.964814	-0.554904	-0.40991		n.s.
P43034;I3L3N5;I3L495;P43034-2	P43034	PAFAH1B1	30.5509	0.404246	0.374684	0.226102	n.s.	n.s.	n.s.	0.0965867	-0.107233	0.20382		n.s.
P43121;P43121-2	P43121	MCAM	30.3189	0.209453	0.202043	0.0603273	n.s.	n.s.	n.s.	0.253266	-0.271149	0.524414		n.s.
P43155-2;P43155;P43155-3;H0Y4Z7;B7ZBP5;A6PVN3	P43155-2;P43155;P43155-3	CRAT	32.8884	0.026142	0.934106	0.119795	AvC_do	n.s.	n.s.	-0.23062	0.0109131	-0.241533		n.s.
P43251-4;P43251;P43251-3;P43251-2;C9JSN9;A0A2R8Y5J9;F8WCU5	P43251-4;P43251;P43251-3;P43251-2;C9JSN9	BTD	25.1361	0.699734	0.139202	0.18507	n.s.	n.s.	n.s.	0.163551	-0.585643	0.749193		n.s.
P43304;P43304-2;F5GYK7;E7EM56	P43304;P43304-2	GPD2	30.1675	0.00907061	0.000697901	0.571064	AvC_do	AvM_do	n.s.	-0.477739	-0.670299	0.192561	AS specific	changed in MR
P43490;A0A0C4DFS8;C9JG65;C9JF35	P43490;A0A0C4DFS8	NAMPT	31.4439	6.46062e-06	0.63189	8.11347e-05	AvC_do	n.s.	MvC_do	-0.707846	0.0875664	-0.795412	shared	n.s.
P43652;CON__REFSEQ:XP_585019	P43652	AFM	29.0304	5.83246e-06	0.662393	8.56786e-05	AvC_up	n.s.	MvC_up	2.50173	-0.284646	2.78637	shared	n.s.
P43686;P43686-2	P43686;P43686-2	PSMC4	30.8474	0.225254	0.049617	0.663954	n.s.	AvM_do	n.s.	-0.187245	-0.313236	0.12599		changed in MR
P43897;P43897-2;C9JG32;F8VPA7;F8VS27;P43897-4;P43897-3;F8WCK2	P43897;P43897-2	TSFM	29.1512	0.0730762	0.725215	0.420367	n.s.	n.s.	n.s.	-0.362551	-0.0859065	-0.276645		n.s.
P45379-4;P45379-3;Q7Z554;P45379-12;C9JM61	P45379-4;P45379-3;Q7Z554;P45379-12	TNNT2	23.5331	0.00275772	0.744292	0.0124179	AvC_up	n.s.	MvC_up	1.28885	-0.175194	1.46404	shared	n.s.
P45880;A0A0A0MR02	P45880;A0A0A0MR02	VDAC2	35.0089	0.00381016	0.0163943	0.884517	AvC_do	AvM_do	n.s.	-0.298347	-0.26339	-0.0349568	AS specific	changed in MR
P45954	P45954	ACADSB	31.9953	0.00859155	0.0147384	0.988319	AvC_do	AvM_do	n.s.	-0.295342	-0.291946	-0.00339568	AS specific	changed in MR
P45974-2;P45974;F5H571	P45974-2;P45974	USP5	31.114	0.580107	0.0505182	0.0581961	n.s.	n.s.	n.s.	0.0770534	-0.261096	0.33815		n.s.
P45984-2;P45984;P45984-3;P45984-4;J3KNK1;P45984-5	P45984-2;P45984;P45984-3;P45984-4;J3KNK1;P45984-5	MAPK9	26.406	0.271647	0.0854656	0.736836	n.s.	n.s.	n.s.	-0.416733	-0.66757	0.250837		n.s.
P45985;P45985-2	P45985;P45985-2	MAP2K4	27.63	0.0608422	0.0365139	0.884387	n.s.	AvM_do	n.s.	-0.527609	-0.622356	0.0947465		changed in MR
P46019	P46019	PHKA2	26.9769	0.755366	0.284258	0.676742	n.s.	n.s.	n.s.	-0.149526	-0.482179	0.332653		n.s.
P46020-2;P46020-3	P46020-2;P46020-3	PHKA1	28.5464	0.726893	0.671711	0.96717	n.s.	n.s.	n.s.	-0.101007	-0.128589	0.0275822		n.s.
P46060;H0Y4Q3;B0QYT5;B0QYT4;B0QYT6	P46060	RANGAP1	26.1936	0.0344897	0.392222	0.521865	AvC_do	n.s.	n.s.	-1.06966	-0.487637	-0.582019		n.s.
P46063;F8WA66;F8WD97;F5H2L2;F5H4P4;F5H3W0;F5GYB7	P46063	RECQL	28.7504	0.153949	0.00767416	0.428267	n.s.	AvM_do	n.s.	-0.343282	-0.663926	0.320644		changed in MR
P46108	P46108	CRK	29.1725	0.494069	0.676315	0.919454	n.s.	n.s.	n.s.	-0.103859	-0.0709385	-0.0329207		n.s.
P46109	P46109	CRKL	29.2701	0.181215	0.0436475	0.690807	n.s.	AvM_do	n.s.	-0.244349	-0.383877	0.139529		changed in MR
P46199;H7C213	P46199	MTIF2	27.8787	0.129436	0.123655	0.967861	n.s.	n.s.	n.s.	-0.352013	-0.376624	0.0246108		n.s.
P46734;P46734-3;P46734-2;E9PRZ0;J3QR49;J3KRV4;X6RB39;J3QL77;K7ELM6;E9PMA8	P46734;P46734-3;P46734-2	MAP2K3	27.6985	0.00229522	0.86193	0.045404	AvC_do	n.s.	MvC_do	-1.24209	-0.0885231	-1.15357	shared	n.s.
P46736-2;P46736;P46736-3;H9KVA9;A0A087WZR3;A0A0D9SF50;P46736-5;X6RJS7;P46736-4;A0A0A0MS96	P46736-2;P46736;P46736-3;H9KVA9;A0A087WZR3;A0A0D9SF50;P46736-5;X6RJS7;P46736-4	BRCC3	24.4935	0.597401	0.675592	0.545175	n.s.	n.s.	n.s.	0.214339	-0.184664	0.399002		n.s.
P46777;A0A2R8Y6J3;A0A2R8Y4A2;Q5T7N0;R4GNJ2	P46777;A0A2R8Y6J3	RPL5	30.0782	0.00200724	0.00242311	0.954715	AvC_do	AvM_do	n.s.	-0.532778	-0.558992	0.0262134	AS specific	changed in MR
P46778;G3V1B3;M0R181	P46778;G3V1B3;M0R181	RPL21	28.9512	0.0235942	0.43433	0.426993	AvC_do	n.s.	n.s.	-0.80087	-0.31654	-0.48433		n.s.
P46783;Q9NQ39	P46783;Q9NQ39	RPS10	27.7109	0.675069	0.809828	0.944835	n.s.	n.s.	n.s.	-0.142984	-0.0898639	-0.05312		n.s.
P46821;D6RA32;D6RA40;D6RGJ3;D6RCL2	P46821	MAP1B	30.4426	0.334585	0.311791	0.969109	n.s.	n.s.	n.s.	-0.288384	-0.317456	0.0290723		n.s.
P46926;D6R9P4;D6RAY7;P46926-2;D6RB13;D6R917	P46926;D6R9P4;D6RAY7;P46926-2;D6RB13	GNPDA1	29.7132	0.308398	0.103586	0.743109	n.s.	n.s.	n.s.	-0.144457	-0.236159	0.0917019		n.s.
P46937;P46937-9;P46937-4;H0YCI3	P46937;P46937-9;P46937-4;H0YCI3	YAP1	26.6329	0.222839	0.909486	0.541491	n.s.	n.s.	n.s.	0.666742	0.0779112	0.588831		n.s.
P46939;P46939-2;P46939-4;P46939-3;H0Y337;A0A0D9SG57;A0A0A0MSM3;Q5JT45;Q5JT44;Q5SYY2	P46939;P46939-2	UTRN	29.6628	0.0649015	0.0590488	0.00393356	n.s.	n.s.	MvC_up	0.330653	-0.356505	0.687158		n.s.
P46940;A0A0J9YXZ5;H0YLE8;A0A087X225;A0A087WWP1;H0YKA5	P46940;A0A0J9YXZ5;H0YLE8	IQGAP1	31.9929	0.452489	0.0453681	0.445198	n.s.	AvM_do	n.s.	-0.15307	-0.402146	0.249076		changed in MR
P46976-2;P46976;C9JQ42;G5E9W8;P46976-3;C9J8R8;C9J7C7	P46976-2;P46976;C9JQ42	GYG1	31.7347	1.13254e-08	0.0012221	0.0571215	AvC_do	AvM_do	n.s.	-1.22402	-0.68662	-0.537404	AS specific	changed in MR
P46977;P46977-2;A0A0C4DH80;E9PN73;E9PI32;H0YET6	P46977;P46977-2	STT3A	28.0428	0.97054	0.168282	0.394559	n.s.	n.s.	n.s.	-0.0100146	-0.304867	0.294853		n.s.
P47755;F8W9N7;A0A0D9SET8;C9JUG7;P47755-2;F8WED3	P47755;F8W9N7;A0A0D9SET8;C9JUG7;P47755-2	CAPZA2	32.2381	0.00668747	0.110424	0.597075	AvC_do	n.s.	n.s.	-0.251232	-0.159586	-0.0916464		n.s.
P47756;B1AK85	P47756;B1AK85	CAPZB	31.7169	0.752813	0.43318	0.474427	n.s.	n.s.	n.s.	0.0336529	-0.0810991	0.114752		n.s.
P47813;O14602;X6RAC9;A6NJH9	P47813;O14602;X6RAC9;A6NJH9	EIF1AX	26.6456	0.150659	0.927358	0.431677	n.s.	n.s.	n.s.	-0.613956	-0.0491807	-0.564775		n.s.
P47897;P47897-2;A0A0U1RQT0;C9J165;A0A0U1RQE9;A0A0U1RQM8;A0A0U1RRI9;A0A0U1RQU2;A0A0U1RQL2;F2Z2V6;A0A0U1RQC3	P47897;P47897-2	QARS	29.9077	0.00132969	0.00372294	0.963084	AvC_do	AvM_do	n.s.	-0.350107	-0.336045	-0.0140614	AS specific	changed in MR
P47985	P47985	UQCRFS1	34.5593	0.757598	0.133618	0.483944	n.s.	n.s.	n.s.	0.0458005	0.203714	-0.157913		n.s.
P48047;H7C0C1;H7C086;H7C068	P48047;H7C0C1	ATP5PO	35.5859	2.30195e-05	0.0457366	0.148864	AvC_do	AvM_do	n.s.	-0.51446	-0.254838	-0.259622	AS specific	changed in MR
P48059-3;P0CW19-2;F8WC86;P0CW20;P0CW19	P48059-3	LIMS1	29.2999	0.0713223	0.234581	0.808756	n.s.	n.s.	n.s.	0.290977	0.20672	0.0842575		n.s.
P48147	P48147	PREP	30.6151	0.674642	0.691298	0.9997	n.s.	n.s.	n.s.	0.0819584	0.0821343	-0.00017592		n.s.
P48163;P48163-2	P48163;P48163-2	ME1	29.4773	0.870194	0.16296	0.284705	n.s.	n.s.	n.s.	0.0494522	-0.366574	0.416026		n.s.
P48200;H0YNL8;P48200-2;H0YLE0;H0YMA8;H0YL48	P48200	IREB2	24.6497	0.00551824	0.148802	0.499272	AvC_up	n.s.	n.s.	1.41435	0.795889	0.61846		n.s.
P48382;F8W689;P48382-2;A0A0A0MSQ2;H0Y4B4;A0A0A0MSM9;F6X9D6;F6R6G4;F6UE82;F6S3S0;A0A0A0MT34;F8WDU3;F8WFE4;F2Z2G0	P48382;F8W689;P48382-2	RFX5	25.0227	0.116421	0.432248	0.0871476	n.s.	n.s.	n.s.	-1.16789	0.655448	-1.82334		n.s.
P48426;P48426-2	P48426;P48426-2	PIP4K2A	25.1182	0.807483	0.0184924	0.0483827	n.s.	AvM_do	MvC_up	0.112966	-0.973155	1.08612	MR sepcific	changed in MR
P48444;B0YIW6;P48444-2;Q6P1Q5;E9PK34	P48444;B0YIW6;P48444-2	ARCN1	29.1815	0.0216953	0.0892009	0.83221	AvC_do	n.s.	n.s.	-0.40759	-0.323017	-0.0845732		n.s.
P48449;P48449-3;P48449-2;A0A0G2JQD0;C9J315;A0A0G2JS81;H7C3A5	P48449;P48449-3;P48449-2;A0A0G2JQD0	LSS	28.3291	0.149359	0.216264	0.963084	n.s.	n.s.	n.s.	-0.475589	-0.433786	-0.0418027		n.s.
P48506;A0A2R8YEL6;B4E2I4;E1CEI4;A0A2R8Y648;A0A0C4DGB2;D6RGF8	P48506;A0A2R8YEL6;B4E2I4;E1CEI4;A0A2R8Y648	GCLC	28.0269	0.93662	0.139703	0.376574	n.s.	n.s.	n.s.	-0.0341685	-0.527932	0.493763		n.s.
P48507;P48507-2	P48507;P48507-2	GCLM	26.6975	0.53384	0.631867	0.968359	n.s.	n.s.	n.s.	-0.286139	-0.241305	-0.0448343		n.s.
P48637;A0A2R8Y430;A0A2R8Y5T7;P48637-2;A0A2R8Y7I7;A0A2R8Y6Q7;A0A2R8YF34;A0A2R8Y790;A0A2R8Y446;A0A0S2Z4J7;A0A2R8Y2X9;A0A2R8Y6Y6;A0A2R8Y4V9;A0A2R8Y2F2	P48637;A0A2R8Y430;A0A2R8Y5T7;P48637-2	GSS	29.5259	0.644535	0.0285624	0.0433625	n.s.	AvM_do	MvC_up	0.0765069	-0.340236	0.416743	MR sepcific	changed in MR
P48643;E7ENZ3;B7ZAR1;E9PCA1;P48643-2;D6RIZ7;H0Y914	P48643;E7ENZ3;B7ZAR1;E9PCA1;P48643-2	CCT5	31.6786	4.91102e-05	0.0224019	0.289902	AvC_do	AvM_do	n.s.	-0.366854	-0.216103	-0.150751	AS specific	changed in MR
P48681	P48681	NES	33.3239	0.000224382	0.279746	0.0817748	AvC_up	n.s.	n.s.	0.662519	0.211873	0.450647		n.s.
P48728;B3KTU4;A0A1B0GTM2;P48728-3;A0A1B0GVP5;P48728-4;H0Y695;A0A1B0GTA8;A0A1B0GWC4;A0A1B0GTV8;A0A1B0GUU7;A0A1B0GU55	P48728;B3KTU4;A0A1B0GTM2;P48728-3;A0A1B0GVP5;P48728-4;H0Y695;A0A1B0GTA8;A0A1B0GWC4;A0A1B0GTV8;A0A1B0GUU7	AMT	29.452	0.0283082	0.498743	0.412075	AvC_do	n.s.	n.s.	-0.370496	-0.133196	-0.237301		n.s.
P48729;P48729-2;H0Y9X2;U3KQK7;U3KPX3;U3KQ83;E5RG27;D6RGE5	P48729;P48729-2	CSNK1A1	28.4988	0.580107	0.224766	0.731926	n.s.	n.s.	n.s.	-0.132054	-0.283493	0.151439		n.s.
P48735;P48735-2;H0YL11;H0YLL5	P48735;P48735-2;H0YL11	IDH2	36.9788	3.95631e-05	0.0346352	0.216904	AvC_do	AvM_do	n.s.	-0.483603	-0.261125	-0.222477	AS specific	changed in MR
P48739-3;P48739;P48739-2;A0A0A0MSW4;B3KYB6;B3KYB7	P48739-3;P48739;P48739-2;A0A0A0MSW4;B3KYB6;B3KYB7	PITPNB	27.8377	0.865677	0.611477	0.673898	n.s.	n.s.	n.s.	-0.0573796	0.165509	-0.222888		n.s.
P48751;P48751-3;P48751-2;F8WD49;H7C1Z2	P48751;P48751-3;P48751-2	SLC4A3	25.6786	0.00381882	0.00587235	0.989208	AvC_do	AvM_do	n.s.	-1.39531	-1.40888	0.0135636	AS specific	changed in MR
P49006	P49006	MARCKSL1	24.5648	0.704362	0.656607	0.60015	n.s.	n.s.	n.s.	0.180487	-0.222345	0.402833		n.s.
P49137;P49137-2	P49137;P49137-2	MAPKAPK2	27.7371	0.470175	0.261492	0.189502	n.s.	n.s.	n.s.	-0.204832	0.321797	-0.526629		n.s.
P49189;P49189-2	P49189;P49189-2	ALDH9A1	32.4955	0.0706485	0.360044	0.682686	n.s.	n.s.	n.s.	0.153928	0.0864292	0.0674986		n.s.
P49207	P49207	RPL34	28.6794	0.866885	0.275154	0.594706	n.s.	n.s.	n.s.	-0.0479713	-0.276661	0.22869		n.s.
P49247	P49247	RPIA	26.9856	0.187986	0.0192232	0.531059	n.s.	AvM_do	n.s.	-0.527128	-0.968151	0.441023		changed in MR
P49257	P49257	LMAN1	30.7503	0.587253	0.159341	0.632447	n.s.	n.s.	n.s.	-0.0685807	-0.171543	0.102962		n.s.
P49321;P49321-3;P49321-4;P49321-2;E9PPR5;Q5T624;E9PI86;E9PRH9;E9PNB5;E9PPQ8;H0YDS9;H0YF33;E9PQG5;E9PAU3;E9PKR5;E9PJQ2	P49321;P49321-3;P49321-4;P49321-2	NASP	25.6473	0.215102	0.121924	0.869535	n.s.	n.s.	n.s.	-0.665948	-0.863445	0.197497		n.s.
P49327;A0A0U1RQF0;A0A0U1RRG3;A0A1B0GTR5	P49327;A0A0U1RQF0	FASN	26.7196	0.0248842	0.362795	0.493005	AvC_do	n.s.	n.s.	-2.03783	-0.926711	-1.11112		n.s.
P49354;E9PQP6;P49354-2;B3KVN2;H0YCW1;E9PPM9;E9PN85	P49354;E9PQP6;P49354-2;B3KVN2;H0YCW1	FNTA	28.6103	0.397652	0.927358	0.579577	n.s.	n.s.	n.s.	-0.28434	0.0368801	-0.32122		n.s.
P49368;B4DUR8;E9PRC8;Q5SZX6;Q5SZX9;E9PQ35	P49368;B4DUR8	CCT3	31.7961	0.000270322	9.4379e-05	0.760796	AvC_do	AvM_do	n.s.	-0.478903	-0.562734	0.083831	AS specific	changed in MR
P49406;S4R3W9;A0A0A0MRF4;S4R455;H7C2J0	P49406;S4R3W9	MRPL19	27.6414	3.72569e-05	0.000893352	0.769428	AvC_do	AvM_do	n.s.	-0.941121	-0.80113	-0.139992	AS specific	changed in MR
P49407-2;H0YET9	P49407-2;H0YET9	ARRB1	25.2076	0.945218	0.00897281	0.0431198	n.s.	AvM_do	MvC_up	0.0562139	-1.75426	1.81048	MR sepcific	changed in MR
P49411;H3BNU3	P49411	TUFM	34.731	0.0462541	0.106303	0.906699	AvC_do	n.s.	n.s.	-0.160485	-0.139002	-0.021483		n.s.
P49419-2;A0A1B0GW77;P49419;A0A1B0GTG2;A0A1B0GUA1;A0A1B0GW82;A0A1B0GTY9;A0A1B0GTJ4;A0A1B0GV49;P49419-4;A0A0J9YWF7;A0A1B0GUY0;H0YHM6;F8WDY6;F8VVF2;A0A1B0GVU0;A0A0J9YWM6;A0A1B0GW65;F8WD33;A0A0J9YWK1	P49419-2;A0A1B0GW77;P49419;A0A1B0GTG2;A0A1B0GUA1;A0A1B0GW82;A0A1B0GTY9;A0A1B0GTJ4;A0A1B0GV49;P49419-4	ALDH7A1	32.7102	0.000874071	7.99223e-05	0.575289	AvC_do	AvM_do	n.s.	-0.378268	-0.496165	0.117897	AS specific	changed in MR
P49441;C9J173;B8ZZF6;E7ET59;E7EUX4;E7ENF2;C9J128;C9J2Z6;C9J2N5	P49441	INPP1	25.7941	0.754874	0.25044	0.319502	n.s.	n.s.	n.s.	0.127839	-0.43692	0.564759		n.s.
P49458;E9PE20;P49458-2	P49458;E9PE20;P49458-2	SRP9	27.6628	0.905724	0.497927	0.617482	n.s.	n.s.	n.s.	-0.0393228	0.200722	-0.240045		n.s.
P49585;C9JEJ2;C9J050;H7C1T3;C9J2E1;H7BZN1;C9JPY0;C9JVS0;F8WAZ5;F8WBU2;F2Z2B1	P49585;C9JEJ2;C9J050;H7C1T3;C9J2E1	PCYT1A	27.7954	0.0972309	0.112889	0.992469	n.s.	n.s.	n.s.	-0.371944	-0.376395	0.00445075		n.s.
P49588;P49588-2;H3BPK7	P49588;P49588-2	AARS	29.6926	0.018779	0.16489	0.660932	AvC_do	n.s.	n.s.	-0.279309	-0.1781	-0.101208		n.s.
P49589-3;P49589;B4DKY1;P49589-2;E9PLP0;E9PRS8;C9JLN0	P49589-3;P49589;B4DKY1;P49589-2	CARS	26.2715	0.00610353	0.0790739	0.661	AvC_do	n.s.	n.s.	-1.15791	-0.796931	-0.360977		n.s.
P49593;A8MX49;P49593-2;B5MCT7;C9J2F3;C9JL74	P49593;A8MX49;P49593-2;B5MCT7	PPM1F	28.788	0.0117366	0.0279605	0.942659	AvC_do	AvM_do	n.s.	-0.813844	-0.754614	-0.0592296	AS specific	changed in MR
P49720;A0A087WXQ8;A0A087WY10	P49720;A0A087WXQ8;A0A087WY10	PSMB3	30.181	0.189914	0.204787	0.988319	n.s.	n.s.	n.s.	-0.367642	-0.375924	0.00828157		n.s.
P49721;A0A087WVV1	P49721;A0A087WVV1	PSMB2	30.7287	0.00115858	6.94873e-05	0.520643	AvC_do	AvM_do	n.s.	-0.459957	-0.623955	0.163998	AS specific	changed in MR
P49748-3;P49748;G3V1M7;K7EQP4;J3QRJ8;J3QKU9;K7EJW8	P49748-3;P49748	ACADVL	36.4317	0.0032455	0.0997601	0.512354	AvC_do	n.s.	n.s.	-0.331088	-0.198429	-0.132659		n.s.
P49755;G3V2K7	P49755	TMED10	29.764	0.0288239	0.054269	0.963084	AvC_do	n.s.	n.s.	-0.292912	-0.275594	-0.0173182		n.s.
P49770;H0YJJ8;G3V5E5;H0YK01	P49770;H0YJJ8;G3V5E5	EIF2B2	26.1952	0.21982	0.282428	0.972851	n.s.	n.s.	n.s.	-0.491186	-0.458401	-0.0327852		n.s.
P49773;D6REP8;D6RE99;D6RD60;D6RC06	P49773;D6REP8;D6RE99;D6RD60	HINT1	31.0362	0.813686	0.799187	0.98743	n.s.	n.s.	n.s.	0.0553199	0.0626378	-0.00731793		n.s.
P49789;E9PBZ0	P49789	FHIT	28.3513	0.102566	0.156838	0.962572	n.s.	n.s.	n.s.	-0.330131	-0.303895	-0.0262353		n.s.
P49840;A8MT37;M0QYV0	P49840;A8MT37;M0QYV0	GSK3A	26.1593	0.977272	0.107671	0.290627	n.s.	n.s.	n.s.	0.0124567	0.580392	-0.567935		n.s.
P49841;P49841-2;A0A3B3ITW1	P49841;P49841-2;A0A3B3ITW1	GSK3B	28.1655	0.0567456	0.479473	0.545175	n.s.	n.s.	n.s.	0.43146	0.18424	0.24722		n.s.
P49902;P49902-2;Q5JUV4;Q5JUV6;Q5JUV3;H0YHR8;REV__M0QX83;S4R3E7;S4R3A6;REV__H0YES7;REV__F5GWJ3;REV__A0A1B0GW38	P49902;P49902-2	NT5C2	26.9095	0.523583	0.804125	0.866519	n.s.	n.s.	n.s.	-0.371648	-0.165868	-0.20578		n.s.
P49903;P49903-4;P49903-2;P49903-3;Q5T5U6;Q5T5U7	P49903;P49903-4;P49903-2;P49903-3;Q5T5U6	SEPHS1	25.366	0.118134	0.258679	0.881966	n.s.	n.s.	n.s.	-0.660059	-0.514302	-0.145758		n.s.
P49914;A0A0A6YYL1;A0A0U1RQM3;P49914-2;A0A0U1RR23;H3BMB9;H3BN04	P49914;A0A0A6YYL1;A0A0U1RQM3;P49914-2	MTHFS	25.6586	0.0593957	0.995494	0.221239	n.s.	n.s.	n.s.	-0.626254	0.00216935	-0.628423		n.s.
P49915	P49915	GMPS	25.586	0.00373341	0.0440167	0.714164	AvC_do	AvM_do	n.s.	-1.20016	-0.893722	-0.306435	AS specific	changed in MR
P49961-5;P49961;P49961-2;P49961-6;P49961-4;A0A0U1RR44;R4GMQ9	P49961-5;P49961;P49961-2;P49961-6;P49961-4	ENTPD1	28.4563	0.671212	0.60567	0.545132	n.s.	n.s.	n.s.	0.45091	-0.570484	1.02139		n.s.
P50148;B1AM21	P50148	GNAQ	25.5155	0.368761	0.38672	0.992876	n.s.	n.s.	n.s.	-0.461137	-0.470115	0.00897773		n.s.
P50213;H0YL72;P50213-2;H0YMU3;H0YLI6;H0YKD0;H0YM64;H0YM46;H0YNF8;H0YL05;Q68D72;H0YLF8	P50213;H0YL72;P50213-2;H0YMU3	IDH3A	33.9714	0.000523404	0.00336317	0.878356	AvC_do	AvM_do	n.s.	-0.476395	-0.426875	-0.0495198	AS specific	changed in MR
P50225;H3BRY5;P50226;H3BQX5;E9PKW4;P50225-2;E9PM76	P50225;H3BRY5;P50226;H3BQX5;E9PKW4;P50225-2	SULT1A1	28.9273	0.5393	0.0119109	0.195534	n.s.	AvM_do	n.s.	-0.233044	-0.92191	0.688865		changed in MR
P50238;K4DIB9;H3BRQ4	P50238;K4DIB9;H3BRQ4	CRIP1	27.9229	0.151093	0.917748	0.328734	n.s.	n.s.	n.s.	0.782422	-0.0699016	0.852324		n.s.
P50336;H0YFP3;F5GZT7;A0A1W2PRF9;A0A1W2PQM0;A0A1W2PPA5;A0A1W2PNH4;F5H1I5;F5H825;H0YFE1	P50336	PPOX	27.6119	0.000909468	0.0135193	0.735487	AvC_do	AvM_do	n.s.	-1.30613	-1.03263	-0.273507	AS specific	changed in MR
P50395;P50395-2;Q5SX87;Q5SX91;V9GYF8;Q5SX90;Q5SX86;V9GYJ7	P50395;P50395-2;Q5SX87	GDI2	33.5545	0.0704826	0.0580118	0.937377	n.s.	n.s.	n.s.	-0.173422	-0.191711	0.0182894		n.s.
P50402;Q5HY57;F8WEQ1	P50402;Q5HY57	EMD	29.1764	0.00831596	0.0112662	0.978838	AvC_up	AvM_up	n.s.	0.389603	0.398322	-0.00871961	AS specific	changed in AS
P50416;P50416-2;H3BP22;H3BUV7;H3BUJ0;H3BMD2	P50416;P50416-2	CPT1A	28.7561	0.222851	0.0369982	0.605785	n.s.	AvM_do	n.s.	-0.285086	-0.503275	0.218189		changed in MR
P50440;P50440-3;P50440-2;H0YMX4;H0YKW9;H0YN43;H0YLC6;H0YL75	P50440;P50440-3;P50440-2	GATM	26.9167	0.997369	0.446524	0.648281	n.s.	n.s.	n.s.	-0.00121629	0.291876	-0.293092		n.s.
P50453	P50453	SERPINB9	27.7771	0.974026	0.0593477	0.204852	n.s.	n.s.	n.s.	-0.0152676	-0.718998	0.703731		n.s.
P50454;E9PPV6;E9PR70;E9PK86;E9PMI5;E9PNX1;E9PKH2;E9PJH8;E9PIG2;E9PRS3;E9PQ34;E9PLA6;H0YEP8	P50454;E9PPV6;E9PR70;E9PK86;E9PMI5	SERPINH1	31.1953	0.018779	0.971901	0.104985	AvC_do	n.s.	n.s.	-0.451399	0.00811706	-0.459516		n.s.
P50461;A0A3B3IT61;P50461-2	P50461	CSRP3	34.3265	0.0435854	0.00413732	0.584941	AvC_up	AvM_up	n.s.	0.399226	0.598031	-0.198805	AS specific	changed in AS
P50479	P50479	PDLIM4	24.5744	0.00229579	0.00976529	0.89547	AvC_up	AvM_up	n.s.	1.47703	1.32744	0.149594	AS specific	changed in AS
P50502;Q3KNR6;F6VDH7;Q8NFI4;H7C3I1;F8WAQ7	P50502;Q3KNR6;F6VDH7;Q8NFI4	ST13	31.521	0.113907	0.611375	0.142498	n.s.	n.s.	n.s.	0.189325	-0.071611	0.260936		n.s.
P50552;K7EM16;K7ENL7;K7ENR7;K7EIG8;K7EQD0	P50552	VASP	27.449	0.518778	0.844681	0.836109	n.s.	n.s.	n.s.	0.154962	0.0536062	0.101356		n.s.
P50570-3;P50570-4;K7EMQ3	P50570-3;P50570-4	DNM2	30.7482	0.516439	0.0607149	0.465863	n.s.	n.s.	n.s.	-0.0653313	-0.182966	0.117635		n.s.
P50579;F8VQZ7;P50579-2;F8VRR3;G3V1U3;F8VY03;F8VSC4;F8VZX9	P50579;F8VQZ7;P50579-2;F8VRR3;G3V1U3	METAP2	27.3863	0.952357	0.19266	0.373705	n.s.	n.s.	n.s.	-0.0165447	0.305496	-0.322041		n.s.
P50583	P50583	NUDT2	26.9819	0.15255	0.134824	0.958369	n.s.	n.s.	n.s.	-0.605798	-0.664428	0.0586295		n.s.
P50851	P50851	LRBA	29.3302	0.680396	0.0566089	0.0850933	n.s.	n.s.	n.s.	-0.167743	0.721344	-0.889087		n.s.
P50895;A0A087WXM8;K7ENU8;K7ERB7	P50895;A0A087WXM8;K7ENU8	BCAM	31.3272	0.54606	0.0277565	0.297156	n.s.	AvM_do	n.s.	-0.0776517	-0.273021	0.195369		changed in MR
P50914;E7EPB3	P50914;E7EPB3	RPL14	28.6376	0.140396	0.226939	0.0463161	n.s.	n.s.	MvC_do	-0.443414	0.387848	-0.831262		n.s.
P50990;P50990-2;H7C4C8;H7C2U0	P50990;P50990-2	CCT8	32.0753	0.000143059	0.000467366	0.980641	AvC_do	AvM_do	n.s.	-0.323281	-0.318833	-0.00444788	AS specific	changed in MR
P50991;P50991-2	P50991;P50991-2	CCT4	31.8707	0.000247349	0.000422364	0.963084	AvC_do	AvM_do	n.s.	-0.3401	-0.352009	0.0119082	AS specific	changed in MR
P50995-2;P50995;H0Y6E1;E5RIN3	P50995-2;P50995	ANXA11	32.706	0.00128455	0.674993	0.0581961	AvC_up	n.s.	n.s.	0.293901	0.0467541	0.247147		n.s.
P51114;P51114-2;E9PFF5;C9JYQ6	P51114;P51114-2;E9PFF5	FXR1	28.4227	0.0268198	0.0165903	0.886579	AvC_do	AvM_do	n.s.	-0.431336	-0.496201	0.064865	AS specific	changed in MR
P51116;I3L1Z2	P51116	FXR2	28.4481	0.2864	0.00770765	0.28678	n.s.	AvM_do	n.s.	-0.21627	-0.545554	0.329284		changed in MR
P51148;P51148-2;K7ERI8;F8VVK3;K7ENY4;F8VSF8;K7EIP6	P51148;P51148-2;K7ERI8;F8VVK3	RAB5C	30.1767	0.972483	0.804125	0.906699	n.s.	n.s.	n.s.	0.00493533	0.0342947	-0.0293594		n.s.
P51149;C9J8S3;C9J592;C9IZZ0;C9J4V0;C9J4S4;C9J7D1	P51149;C9J8S3;C9J592;C9IZZ0;C9J4V0	RAB7A	31.4448	0.474355	0.605506	0.95174	n.s.	n.s.	n.s.	-0.0805683	-0.0640501	-0.0165182		n.s.
P51151	P51151	RAB9A	26.0605	0.0375519	0.280488	0.638753	AvC_do	n.s.	n.s.	-0.661749	-0.377439	-0.28431		n.s.
P51153;A0A087WWB9	P51153;A0A087WWB9	RAB13	25.4151	0.0214381	0.152374	0.704892	AvC_do	n.s.	n.s.	-0.760559	-0.51042	-0.250139		n.s.
P51398-2;P51398;V9GZ03;V9GYL9;V9GYJ9;V9GYA7;V9GZ61;V9GYC9;V9GYW1;V9GY11;V9GYJ3;V9GYF7;V9GYR8;V9GYL4	P51398-2;P51398;V9GZ03;V9GYL9	DAP3	30.4781	0.0126814	0.0100346	0.919454	AvC_do	AvM_do	n.s.	-0.536809	-0.587561	0.0507523	AS specific	changed in MR
P51452;P51452-2;K7ES89;K7ELG5;K7EPK5	P51452;P51452-2;K7ES89	DUSP3	31.577	0.89171	0.0613018	0.247575	n.s.	n.s.	n.s.	0.0229158	0.2617	-0.238784		n.s.
P51553;P51553-2;E7EQB8;G5E9Q7;E9PF84;H7C1W2;H0Y5Q7	P51553;P51553-2;E7EQB8;G5E9Q7;E9PF84;H7C1W2	IDH3G	31.9882	0.41255	0.283421	0.898113	n.s.	n.s.	n.s.	-0.117723	-0.157644	0.039921		n.s.
P51570;P51570-2;K7ERJ9;K7ERN9	P51570;P51570-2	GALK1	27.4051	0.850059	0.0275757	0.164193	n.s.	AvM_do	n.s.	-0.0533859	-0.540011	0.486625		changed in MR
P51571	P51571	SSR4	27.4981	0.0209364	0.0572806	0.904786	AvC_do	n.s.	n.s.	-0.589056	-0.518182	-0.0708738		n.s.
P51572;P51572-2;C9JQ75;C9J0M4;A0A2R8Y5M6;C9JSP1;C9JMD7;C9JM14	P51572;P51572-2;C9JQ75;C9J0M4;A0A2R8Y5M6;C9JSP1;C9JMD7	BCAP31	30.6161	0.321884	0.681763	0.353011	n.s.	n.s.	n.s.	0.138898	-0.0665829	0.205481		n.s.
P51580	P51580	TPMT	24.068	0.0606589	0.12114	0.922732	n.s.	n.s.	n.s.	0.697015	0.612985	0.0840308		n.s.
P51589;A0A3B3IT99;A0A3B3IU95	P51589;A0A3B3IT99;A0A3B3IU95	CYP2J2	25.6934	0.610454	0.128394	0.143978	n.s.	n.s.	n.s.	-0.251618	0.717428	-0.969046		n.s.
P51608-2;P51608;A0A087X1U4;I6LM39;B5MCB4;A0A087WVW7;A0A0D9SFX7;A0A1B0GTV0;A0A0D9SEX1;C9JH89	P51608-2;P51608;A0A087X1U4	MECP2	29.2771	0.74294	0.000440919	0.0113798	n.s.	AvM_do	MvC_up	-0.0547547	-0.542807	0.488052	MR sepcific	changed in MR
P51636-2	P51636-2	CAV2	29.0632	0.173718	0.941658	0.376574	n.s.	n.s.	n.s.	0.458717	-0.0296085	0.488326		n.s.
P51648;P51648-2;J3QRD1;I3L1M4;J3QS00;J3KTG1;C9JGJ2;I3L0X1;J3QKK9;J3KTD9;I3L2W1;K7EN73;J3QQV9;I3L4G6;C9JKT2	P51648;P51648-2;J3QRD1	ALDH3A2	31.1793	0.365332	0.111096	0.708106	n.s.	n.s.	n.s.	0.129407	0.230144	-0.100737		n.s.
P51649;P51649-2;C9J8Q5	P51649;P51649-2;C9J8Q5	ALDH5A1	31.8307	0.000149731	0.157037	0.124396	AvC_do	n.s.	n.s.	-0.466942	-0.185789	-0.281153		n.s.
P51659;A0A2R8YD50;E7EWE5;P51659-3;P51659-2;G5E9S2;E7ET17;E7ER27;A0A2R8YDT8;A0A2R8YF45;A0A2R8Y7W2;A0A2R8YEG2	P51659;A0A2R8YD50;E7EWE5;P51659-3;P51659-2;G5E9S2;E7ET17;E7ER27	HSD17B4	31.6328	0.000177892	0.0231367	0.425646	AvC_do	AvM_do	n.s.	-0.339278	-0.216535	-0.122743	AS specific	changed in MR
P51665;H3BNT7;H3BTM8;H3BQV2	P51665;H3BNT7;H3BTM8	PSMD7	29.4449	0.0533676	0.00136112	0.376574	n.s.	AvM_do	n.s.	-0.408541	-0.720515	0.311974		changed in MR
P51668	P51668	UBE2D1	26.8076	0.431935	0.524611	0.969109	n.s.	n.s.	n.s.	0.493993	0.434243	0.0597502		n.s.
P51687;F8VVW9	P51687	SUOX	30.8496	0.115699	0.14132	0.992469	n.s.	n.s.	n.s.	-0.218221	-0.215442	-0.00277865		n.s.
P51692;C9J4I3	P51692	STAT5B	26.3598	0.05465	0.0321957	0.882942	n.s.	AvM_do	n.s.	-0.951217	-1.12168	0.170462		changed in MR
P51812;B4DG22;B1AXG1;B7ZB17;A0A2R8Y603;A0A2R8Y7S9;B1AXG2;A0A2R8YGB7;E9PMM7	P51812;B4DG22;B1AXG1;B7ZB17	RPS6KA3	27.4213	0.0409273	0.335841	0.598854	AvC_do	n.s.	n.s.	-0.508543	-0.265318	-0.243226		n.s.
P51858;P51858-2;P51858-3	P51858;P51858-2;P51858-3	HDGF	30.0233	0.371662	0.0949424	0.0546656	n.s.	n.s.	n.s.	0.129256	-0.242409	0.371666		n.s.
P51884;CON__Q05443	P51884	LUM	34.4975	0.00184841	0.671711	0.0726361	AvC_up	n.s.	n.s.	1.04435	0.174202	0.870143		n.s.
P51888	P51888	PRELP	33.7745	9.88039e-06	0.246409	0.0163117	AvC_up	n.s.	MvC_up	1.68768	0.470662	1.21701	shared	n.s.
P51911;P51911-2;B7Z7E1;K7EQ72;K7ERK4;K7ER02;K7ENC5;K7ESJ2;K7ERM8	P51911;P51911-2;B7Z7E1	CNN1	31.6423	0.459747	0.60361	0.401635	n.s.	n.s.	n.s.	0.44614	-0.345027	0.791167		n.s.
P51970	P51970	NDUFA8	33.2042	0.125844	0.0590068	0.841314	n.s.	n.s.	n.s.	-0.205226	-0.264496	0.0592696		n.s.
P51991;H7C1J8	P51991	HNRNPA3	30.11	0.0228129	0.495273	0.0270013	AvC_up	n.s.	MvC_up	0.278661	-0.0973832	0.376044	shared	n.s.
P52179;J3KRK2	P52179	MYOM1	36.5364	0.820099	0.524843	0.582477	n.s.	n.s.	n.s.	-0.0263441	0.0723278	-0.098672		n.s.
P52209-2;P52209;K7EPF6;K7EM49;K7ELN9;K7EMN2	P52209-2;P52209	PGD	31.0339	0.0448755	0.0124867	0.764278	AvC_do	AvM_do	n.s.	-0.329873	-0.433589	0.103717	AS specific	changed in MR
P52294;C9JYI4;C9J352;C9JWD9;F2Z3G4;C9J4U1	P52294;C9JYI4	KPNA1	28.2203	0.133535	0.0109035	0.514372	n.s.	AvM_do	n.s.	-0.388612	-0.687026	0.298414		changed in MR
P52565;J3KRE2;J3KTF8;J3QQX2;P52565-2;J3KRY1;J3KS60	P52565;J3KRE2;J3KTF8;J3QQX2;P52565-2;J3KRY1	ARHGDIA	31.0269	0.0180271	0.783683	0.187608	AvC_up	n.s.	n.s.	0.305403	0.044491	0.260912		n.s.
P52566;H0YGX7;F5H3P3;F5H6Q0;F5H2R5	P52566;H0YGX7;F5H3P3;F5H6Q0	ARHGDIB	29.6182	0.253349	0.225234	0.962288	n.s.	n.s.	n.s.	-0.363899	-0.404487	0.0405882		n.s.
P52594-2;P52594-3;P52594;P52594-4;B8ZZY2;C9J2I0	P52594-2;P52594-3;P52594;P52594-4;B8ZZY2;C9J2I0	AGFG1	24.9884	0.452936	0.443602	0.978487	n.s.	n.s.	n.s.	0.387207	0.41725	-0.0300432		n.s.
P52597;A0A1B0GW42	P52597	HNRNPF	27.4641	0.44663	0.214851	0.148896	n.s.	n.s.	n.s.	0.162096	-0.265279	0.427375		n.s.
P52758;H0YBX3;H0YB34	P52758;H0YBX3;H0YB34	RIDA	29.5095	0.503151	0.224961	0.179682	n.s.	n.s.	n.s.	-0.185784	0.335569	-0.521353		n.s.
P52788;P52788-2;H7C2R7	P52788;P52788-2;H7C2R7	SMS	26.8333	0.364362	0.134585	0.760796	n.s.	n.s.	n.s.	-0.276111	-0.459992	0.183881		n.s.
P52888;K7EP46;K7EL02;P52888-2;K7EMU4;K7EIK4;K7EL32	P52888;K7EP46	THOP1	26.5811	0.429716	0.91095	0.593394	n.s.	n.s.	n.s.	0.364979	-0.0612624	0.426241		n.s.
P52895;B4DK69;S4R3P0;P52895-2	P52895;B4DK69;S4R3P0	AKR1C2	24.8556	0.109412	0.613624	0.139296	n.s.	n.s.	n.s.	0.820391	-0.304232	1.12462		n.s.
P52907	P52907	CAPZA1	29.0389	0.797097	0.524611	0.844619	n.s.	n.s.	n.s.	-0.0517558	-0.12623	0.0744743		n.s.
P52943;H0YFA4;H0YHD8	P52943;H0YFA4	CRIP2	33.7731	0.00158955	0.46153	0.124474	AvC_up	n.s.	n.s.	0.376249	0.101197	0.275052		n.s.
P53004	P53004	BLVRA	29.5224	0.0551235	0.00787606	0.647072	n.s.	AvM_do	n.s.	-0.25345	-0.368757	0.115308		changed in MR
P53007;B4DP62	P53007;B4DP62	SLC25A1	28.7412	0.0260442	0.0602765	0.924596	AvC_do	n.s.	n.s.	-0.406669	-0.36573	-0.0409398		n.s.
P53041;H0YDU8;A8MU39;M0R196;A0A087WY80	P53041;H0YDU8;A8MU39	PPP5C	29.3728	0.40459	0.911618	0.705024	n.s.	n.s.	n.s.	0.121548	0.0192102	0.102338		n.s.
P53370;P53370-2;E9PBZ9;H0Y9C0	P53370	NUDT6	26.6321	0.156177	0.31181	0.0755024	n.s.	n.s.	n.s.	-0.633132	0.488603	-1.12173		n.s.
P53384-2;P53384;I3L531;I3L3A0;I3L518	P53384-2;P53384;I3L531	NUBP1	26.0726	0.409915	0.832487	0.521616	n.s.	n.s.	n.s.	0.524847	-0.158442	0.683289		n.s.
P53396;P53396-2;P53396-3;K7ESG8;K7EIE7	P53396;P53396-2;P53396-3	ACLY	28.8225	0.00120143	0.000661972	0.847791	AvC_do	AvM_do	n.s.	-0.634225	-0.71877	0.0845454	AS specific	changed in MR
P53582;H0Y955;H0Y9L0;D6RF24;H0YAI3;H0Y903	P53582	METAP1	26.6776	0.173236	0.233268	0.969537	n.s.	n.s.	n.s.	-0.510468	-0.474959	-0.0355089		n.s.
P53597;H7C233	P53597	SUCLG1	33.726	0.000920029	0.0867436	0.377339	AvC_do	n.s.	n.s.	-0.429472	-0.237316	-0.192156		n.s.
P53611;Q5T4U8	P53611;Q5T4U8	RABGGTB	24.3347	0.256323	0.430795	0.904075	n.s.	n.s.	n.s.	0.354764	0.270075	0.0846887		n.s.
P53618;E9PP73;E9PP63;E9PKQ1	P53618	COPB1	30.0891	0.00287335	0.00323342	0.953077	AvC_do	AvM_do	n.s.	-0.540515	-0.568939	0.0284234	AS specific	changed in MR
P53621;P53621-2;A0A3B3IT15;A0A3B3IS84;A0A3B3IU89;A0A3B3ITV3;A0A3B3ISK1;A0A3B3IU84	P53621;P53621-2;A0A3B3IT15;A0A3B3IS84;A0A3B3IU89	COPA	30.5795	0.019353	0.0260893	0.989842	AvC_do	AvM_do	n.s.	-0.563108	-0.569443	0.00633491	AS specific	changed in MR
P53634;H0YCY8;P53634-2;P53634-3	P53634	CTSC	24.8311	0.328651	0.23025	0.904786	n.s.	n.s.	n.s.	-0.506548	-0.644455	0.137907		n.s.
P53701	P53701	HCCS	28.5101	0.0202904	0.896209	0.087691	AvC_do	n.s.	n.s.	-0.505883	0.0370076	-0.542891		n.s.
P53814-5;A0A087WVP4;A0A096LNK9;H7C372;C9JGQ0	P53814-5;A0A087WVP4	SMTN	29.4181	0.19366	0.56559	0.189376	n.s.	n.s.	n.s.	0.391542	-0.198788	0.59033		n.s.
P53985;Q5T8R5;P53985-2;Q5T8R3	P53985	SLC16A1	29.4006	0.163031	0.756239	0.247582	n.s.	n.s.	n.s.	0.21256	-0.0575929	0.270153		n.s.
P53990-2;H3BUI0;P53990-3;H3BMU1;H3BQF7;J3KR23;F5GXM3;H3BRE2;H3BPP6;H3BQ38;E9PF00	P53990-2;H3BUI0;P53990-3;H3BMU1;H3BQF7;J3KR23	IST1	27.6418	0.00247525	0.0968586	0.485695	AvC_up	n.s.	n.s.	0.789258	0.464468	0.32479		n.s.
P53992;G5EA31;P53992-2;A0A0U1RR49	P53992;G5EA31	SEC24C	28.4583	0.399961	0.0529806	0.519045	n.s.	n.s.	n.s.	-0.140197	-0.320974	0.180777		n.s.
P53999;D6RC37;D6R970	P53999	SUB1	29.135	0.480972	0.51978	0.995161	n.s.	n.s.	n.s.	-0.124408	-0.12257	-0.0018379		n.s.
P54098;A0A1B0GTU7;A0A1B0GVT8;H0YD36;A0A1B0GTQ6;H0YCV2;A0A1B0GW33;A0A0D9SFM1;H0YE43;H0YCD2;H0YDF1	P54098;A0A1B0GTU7	POLG	28.4355	0.00148369	0.0853776	0.441922	AvC_up	n.s.	n.s.	1.27101	0.736884	0.534123		n.s.
P54136;E5RJM9;E5RH09;E5RI24	P54136	RARS	30.3282	0.00112349	0.00242075	0.995671	AvC_do	AvM_do	n.s.	-0.484735	-0.483254	-0.00148107	AS specific	changed in MR
P54253	P54253	ATXN1	26.6233	0.984367	0.519119	0.690807	n.s.	n.s.	n.s.	0.0163876	-0.46339	0.479777		n.s.
P54289;P54289-5;H0Y715	P54289;P54289-5	CACNA2D1	30.4654	0.793423	0.600878	0.893097	n.s.	n.s.	n.s.	-0.0449896	-0.0903287	0.0453391		n.s.
P54289-3	P54289-3	CACNA2D1	25.3772	0.0167691	0.00724174	0.841314	AvC_up	AvM_up	n.s.	1.13317	1.34623	-0.213062	AS specific	changed in AS
P54296;A0A0J9YVV7	P54296;A0A0J9YVV7	MYOM2	36.8182	0.0737946	0.5239	0.567155	n.s.	n.s.	n.s.	-0.216127	-0.0895447	-0.126582		n.s.
P54577;A0A0C4DGZ5	P54577;A0A0C4DGZ5	YARS	28.8659	0.263709	0.35768	0.962288	n.s.	n.s.	n.s.	-0.233778	-0.207105	-0.0266728		n.s.
P54578;P54578-2;A6NJA2;P54578-3;J3QQT6;J3KS55	P54578;P54578-2;A6NJA2;P54578-3	USP14	30.3456	0.284297	0.0557486	0.0218316	n.s.	n.s.	MvC_up	0.10159	-0.184654	0.286244		n.s.
P54619-2;P54619;P54619-3;F8VYY9;H0YIC9;F8VVA3;F8VZX1;H0YHF8;F8VSL2;F8VPF5;F8VRY2;F8VSH3;F8W046	P54619-2;P54619;P54619-3;F8VYY9;H0YIC9	PRKAG1	28.5642	0.601458	0.313164	0.808298	n.s.	n.s.	n.s.	-0.146319	-0.279179	0.13286		n.s.
P54646;A0A087WXX9	P54646;A0A087WXX9	PRKAA2	30.1434	0.0889235	0.0455245	0.858638	n.s.	AvM_do	n.s.	-0.370371	-0.458811	0.0884393		changed in MR
P54652	P54652	HSPA2	30.7275	4.54075e-08	0.0196723	0.0128118	AvC_up	AvM_up	MvC_up	1.85008	0.783341	1.06674	shared	changed in AS
P54709;C9JA36;P54709-2;C9JXZ1;H7C547;F8WBY4;H7C4L9;C9J6S2	P54709;C9JA36;P54709-2;C9JXZ1	ATP1B3	27.9038	0.193962	0.17432	0.961963	n.s.	n.s.	n.s.	-0.275841	-0.30342	0.0275784		n.s.
P54725;P54725-2;K7ENJ0;K7ELW1;K7EQ16;K7ELU6	P54725;P54725-2;K7ENJ0;K7ELW1	RAD23A	28.0967	0.556848	0.916091	0.813094	n.s.	n.s.	n.s.	0.143458	0.0297957	0.113662		n.s.
P54727;P54727-2;H0Y579;Q5W0S5;Q5W0S4	P54727;P54727-2	RAD23B	30.8384	0.144476	0.565397	0.148957	n.s.	n.s.	n.s.	0.172235	-0.0785701	0.250805		n.s.
P54868;P54868-2;P54868-3	P54868;P54868-2;P54868-3	HMGCS2	25.3944	0.336005	0.774808	0.753961	n.s.	n.s.	n.s.	-0.955834	-0.338899	-0.616935		n.s.
P54886;P54886-2	P54886;P54886-2	ALDH18A1	25.4991	0.333989	0.399819	0.978487	n.s.	n.s.	n.s.	-0.441792	-0.413266	-0.0285265		n.s.
P54920;M0R0Y2;M0R2M1;M0R058;M0R213;M0R027;M0QZM9;M0QZN5;M0R031	P54920;M0R0Y2;M0R2M1	NAPA	30.5742	0.00315335	0.463823	0.165412	AvC_do	n.s.	n.s.	-0.332621	-0.0952814	-0.237339		n.s.
P54922;C9JZW7	P54922;C9JZW7	ADPRH	24.5727	0.0754546	0.360798	0.696565	n.s.	n.s.	n.s.	0.628288	0.35775	0.270538		n.s.
P55010;H0YLZ1;H0YN40;H0YMJ8;H0YM54;H0YK11;H0YK29	P55010;H0YLZ1;H0YN40	EIF5	29.2218	0.00246203	0.0766841	0.534328	AvC_do	n.s.	n.s.	-0.501961	-0.314641	-0.187319		n.s.
P55039;A8MZF9;J3QKW7;J3QRI9;J3KRL5;J3QR71;J3QL90;J3QKV7;J3QLF3	P55039;A8MZF9	DRG2	26.9073	0.909323	0.436878	0.575236	n.s.	n.s.	n.s.	0.0413597	-0.249107	0.290467		n.s.
P55042	P55042	RRAD	27.5032	0.18877	0.00383022	0.281739	n.s.	AvM_do	n.s.	-0.421261	-0.95579	0.534529		changed in MR
P55058;P55058-4;P55058-3;P55058-2	P55058;P55058-4;P55058-3;P55058-2	PLTP	25.2605	0.610454	0.842321	0.67225	n.s.	n.s.	n.s.	0.279866	-0.122168	0.402034		n.s.
P55060;P55060-3;P55060-4;P55060-2	P55060;P55060-3;P55060-4	CSE1L	30.6825	0.0100796	0.000978138	0.603921	AvC_do	AvM_do	n.s.	-0.470726	-0.649004	0.178278	AS specific	changed in MR
P55072;C9IZA5;C9JUP7	P55072	VCP	34.2556	0.00262275	0.000569483	0.729726	AvC_do	AvM_do	n.s.	-0.182548	-0.225806	0.043258	AS specific	changed in MR
P55083-2;K7ES70;P55083	P55083-2;K7ES70;P55083	MFAP4	30.691	0.687333	0.164409	0.575236	n.s.	n.s.	n.s.	-0.32182	-1.04013	0.718308		n.s.
P55084;P55084-2;F5GZQ3;B5MD38;C9JEY0;C9JE81;C9K0M0	P55084;P55084-2;F5GZQ3;B5MD38	HADHB	35.6786	3.87224e-05	0.0128727	0.35307	AvC_do	AvM_do	n.s.	-0.518013	-0.327131	-0.190882	AS specific	changed in MR
P55263;P55263-3;P55263-2;P55263-4	P55263;P55263-3;P55263-2;P55263-4	ADK	28.7253	0.831921	0.19861	0.525828	n.s.	n.s.	n.s.	0.0388607	0.214818	-0.175957		n.s.
P55268;F5H520	P55268	LAMB2	34.4532	0.1318	0.071503	0.866519	n.s.	n.s.	n.s.	-0.15649	-0.195955	0.0394648		n.s.
P55290;P55290-4;P55290-5;P55290-3;P55290-2	P55290;P55290-4;P55290-5	CDH13	33.4467	0.000781402	0.149977	0.253161	AvC_do	n.s.	n.s.	-0.383051	-0.177002	-0.206048		n.s.
P55735;P55735-2;P55735-4;P55735-3;A8MXL6;E7ERC8	P55735;P55735-2;P55735-4;P55735-3;A8MXL6	SEC13	28.2846	0.622596	0.77483	0.937377	n.s.	n.s.	n.s.	-0.180595	-0.116971	-0.0636241		n.s.
P55769	P55769	SNU13	25.6639	0.00889512	0.333011	0.356465	AvC_do	n.s.	n.s.	-0.89177	-0.368495	-0.523275		n.s.
P55789;H3BRD2;P55789-2;H3BRW3	P55789;H3BRD2;P55789-2	GFER	24.1377	0.352933	0.706099	0.808911	n.s.	n.s.	n.s.	-0.321337	-0.149509	-0.171828		n.s.
P55795	P55795	HNRNPH2	28.1109	0.127949	0.753291	0.520643	n.s.	n.s.	n.s.	-0.345483	-0.0873073	-0.258176		n.s.
P55809;E9PDW2;Q9BYC2	P55809;E9PDW2	OXCT1	35.0415	0.0204222	0.365573	0.0144532	AvC_do	n.s.	MvC_do	-0.271094	0.11836	-0.389454	shared	n.s.
P55822	P55822	SH3BGR	26.4772	0.907348	0.000111112	0.00210084	n.s.	AvM_up	MvC_do	0.0777105	2.17942	-2.10171	MR sepcific	changed in AS
P55884;P55884-2;C9JZG1	P55884;P55884-2	EIF3B	29.6558	0.0380603	0.317796	0.603921	AvC_do	n.s.	n.s.	-0.329211	-0.175566	-0.153645		n.s.
P55899;M0R0A9;M0R0H0;M0QYM4;M0R220;M0QYN1;M0QYN9;M0R0K7;M0R2T3;M0R266	P55899;M0R0A9;M0R0H0	FCGRT	25.9302	0.60982	0.00849237	0.143243	n.s.	AvM_do	n.s.	-0.254136	-1.23273	0.978593		changed in MR
P55957;P55957-2;P55957-4;B2ZP78;P55957-3	P55957;P55957-2;P55957-4	BID	25.4267	7.74998e-06	0.0390802	0.103513	AvC_do	AvM_do	n.s.	-1.5189	-0.726577	-0.792323	AS specific	changed in MR
P56134-3;P56134	P56134-3;P56134	ATP5MF	26.6475	0.430787	0.473217	0.294746	n.s.	n.s.	n.s.	-0.486975	0.474036	-0.961011		n.s.
P56181	P56181	NDUFV3	30.5277	0.786639	0.026465	0.0609824	n.s.	AvM_up	n.s.	-0.115129	0.841487	-0.956616		changed in AS
P56181-2	P56181-2	NDUFV3	28.4983	0.0181272	0.0615626	0.00109149	AvC_do	n.s.	MvC_do	-0.875022	0.735905	-1.61093	shared	n.s.
P56192;P56192-2;H0YIP0;H0YHV5;H0YI94;F5H2V6;H0YIC2;F8VS26;F8W0M7;F8W0S4;F8VZZ9;F8VPL7;H0YHL6;H0YI27	P56192;P56192-2	MARS	29.5091	0.000177892	0.000606402	0.969537	AvC_do	AvM_do	n.s.	-0.472346	-0.459982	-0.0123635	AS specific	changed in MR
P56199	P56199	ITGA1	28.842	0.621119	0.0320009	0.278057	n.s.	AvM_do	n.s.	-0.17076	-0.70089	0.53013		changed in MR
P56277	P56277	CMC4	25.8043	0.296657	0.00384995	0.202369	n.s.	AvM_up	n.s.	0.449935	1.26015	-0.810218		changed in AS
P56385	P56385	ATP5ME	32.7198	0.975397	0.0119214	0.0671868	n.s.	AvM_up	n.s.	0.00923739	0.606471	-0.597234		changed in AS
P56537;P56537-2;B7ZBH1;A0A0U1RQV5;F8WD20;A0A0B4J1Y7;F8WDS6	P56537;P56537-2	EIF6	26.9996	0.82263	0.0592797	0.273847	n.s.	n.s.	n.s.	0.0994695	0.747593	-0.648124		n.s.
P56539	P56539	CAV3	28.0321	0.577716	0.0355991	0.320777	n.s.	AvM_up	n.s.	0.214867	0.776276	-0.561408		changed in AS
P57088;D6RAA6;H0Y8N0;J3KN43;D6RBY2	P57088;D6RAA6	TMEM33	26.277	0.467978	0.230732	0.812358	n.s.	n.s.	n.s.	-0.312866	-0.517474	0.204608		n.s.
P57772;P57772-2;C9J8T0	P57772;P57772-2;C9J8T0	EEFSEC	26.8236	0.168108	0.00981967	0.447782	n.s.	AvM_do	n.s.	-0.405404	-0.784299	0.378895		changed in MR
P58546;C9JL85	P58546;C9JL85	MTPN	28.827	0.942709	0.408009	0.577778	n.s.	n.s.	n.s.	-0.0192919	0.194059	-0.213351		n.s.
P59666;P59665	P59666;P59665	DEFA3	25.971	0.538492	0.317892	0.847494	n.s.	n.s.	n.s.	-0.429644	-0.704367	0.274722		n.s.
P60174;P60174-4;U3KPZ0;U3KQF3;U3KPS5	P60174;P60174-4	TPI1	35.5899	0.127661	0.63189	0.601236	n.s.	n.s.	n.s.	0.138102	0.0512266	0.0868754		n.s.
P60228;E5RGA2;H0YBR5;E5RHS5;E5RIT4;H0YAW4;E5RII3;E5RIP5;E5RJ25;H0YBP5	P60228;E5RGA2	EIF3E	29.5074	0.003933	0.0872949	0.571064	AvC_do	n.s.	n.s.	-0.475563	-0.302054	-0.173509		n.s.
P60468;S4R3B5	P60468	SEC61B	27.1957	0.0264856	0.000477216	0.350946	AvC_up	AvM_up	n.s.	0.498221	0.846097	-0.347876	AS specific	changed in AS
P60520;H3BSM5;H3BQ50;H3BU36	P60520;H3BSM5	GABARAPL2	25.4304	0.971913	0.375486	0.575025	n.s.	n.s.	n.s.	0.0207759	-0.447931	0.468707		n.s.
P60602;P60602-2	P60602	ROMO1	27.1343	0.576153	0.00559278	0.123265	n.s.	AvM_up	n.s.	0.154826	0.729407	-0.574581		changed in AS
P60660-2;G8JLA2;F8VZU9;F8W180;F8VXL3	P60660-2;G8JLA2	MYL6	32.3824	0.874774	0.563876	0.82779	n.s.	n.s.	n.s.	-0.0697285	-0.243103	0.173374		n.s.
P60709;A0A2R8YFE2	P60709	ACTB	29.1965	0.0927082	0.247682	0.844619	n.s.	n.s.	n.s.	-0.542716	-0.402438	-0.140278		n.s.
P60842;J3KT12;P60842-2;J3QS69;J3KTB5;J3QL43;J3KSZ0;J3QR64;J3QLN6;J3KS25;J3QKZ9;J3QL52;J3KT04;J3KS93;J3QQP0	P60842;J3KT12;P60842-2;J3QS69;J3KTB5;J3QL43;J3KSZ0	EIF4A1	29.7002	9.25695e-05	0.43668	0.0272373	AvC_do	n.s.	MvC_do	-0.765035	-0.172187	-0.592848	shared	n.s.
P60866-2;P60866;E5RIP1;E5RJX2;G3XAN0	P60866-2;P60866	RPS20	30.2511	0.0341599	0.710525	0.297768	AvC_do	n.s.	n.s.	-0.326177	-0.0692673	-0.25691		n.s.
P60903	P60903	S100A10	30.6282	0.0152036	0.0653263	0.836109	AvC_do	n.s.	n.s.	-0.558794	-0.452054	-0.10674		n.s.
P60953;Q5JYX0;A0A3B3IRV0	P60953;Q5JYX0	CDC42	29.2178	0.550358	0.0637227	0.449098	n.s.	n.s.	n.s.	0.148745	0.445739	-0.296994		n.s.
P60981;P60981-2;F6RFD5	P60981;P60981-2;F6RFD5	DSTN	32.6029	0.994994	0.194021	0.412104	n.s.	n.s.	n.s.	0.00152622	0.261902	-0.260376		n.s.
P60983	P60983	GMFB	27.6799	0.202311	0.0858878	0.811181	n.s.	n.s.	n.s.	0.371815	0.519414	-0.147599		n.s.
P61006;P61006-2;H0YMN7;H0YLJ8;H0YL94	P61006;P61006-2	RAB8A	25.8891	0.94977	0.709702	0.874152	n.s.	n.s.	n.s.	-0.0295518	-0.165114	0.135562		n.s.
P61009	P61009	SPCS3	27.2669	0.22358	0.330235	0.945856	n.s.	n.s.	n.s.	-0.304497	-0.262143	-0.0423536		n.s.
P61011;G3V4F7;G3V480;G3V346;A0A0D9SFN7;G3V3L9	P61011;G3V4F7	SRP54	27.2044	0.00349859	0.0520094	0.666867	AvC_do	n.s.	n.s.	-0.92798	-0.661366	-0.266614		n.s.
P61019;P61019-2;H7C125	P61019;P61019-2	RAB2A	31.5803	0.864061	0.624615	0.873697	n.s.	n.s.	n.s.	-0.0234474	-0.0646354	0.041188		n.s.
P61020;P61020-2;F8VUA5;F8VVZ0;F8VPW9;F8VWZ7	P61020;P61020-2;F8VUA5	RAB5B	29.3047	0.249921	0.808663	0.641776	n.s.	n.s.	n.s.	0.195447	0.0498681	0.145579		n.s.
P61026;A0A2R8YDI9;G3V196;A0A2R8YFB8;P59190-2;P59190	P61026	RAB10	29.8263	0.544482	5.72209e-05	0.00460355	n.s.	AvM_up	MvC_do	0.0869008	0.583809	-0.496908	MR sepcific	changed in AS
P61081;M0QX69;M0QYI6	P61081	UBE2M	27.787	0.0088145	0.0602765	0.775802	AvC_up	n.s.	n.s.	0.624143	0.477944	0.146199		n.s.
P61086;D6RDM7;P61086-2;P61086-3;D6RFX1	P61086;D6RDM7;P61086-2;P61086-3	UBE2K	27.753	0.442899	0.524843	0.972547	n.s.	n.s.	n.s.	-0.13991	-0.125509	-0.0144009		n.s.
P61088;F8VSD4;F8VQQ8;F8VV71;Q5JXB2	P61088;F8VSD4;F8VQQ8;F8VV71;Q5JXB2	UBE2N	31.4731	0.690392	0.212532	0.247575	n.s.	n.s.	n.s.	0.0418456	-0.123791	0.165637		n.s.
P61106;X6RFL8	P61106;X6RFL8	RAB14	30.325	0.966318	0.0915798	0.237528	n.s.	n.s.	n.s.	-0.00602262	0.201443	-0.207466		n.s.
P61158;B4DXW1;F8WDR7;C9IZN3;F8WEW2;F8WE84	P61158;B4DXW1	ACTR3	30.6899	0.499206	0.752484	0.883326	n.s.	n.s.	n.s.	-0.097087	-0.0518363	-0.0452508		n.s.
P61160;A0A1B0GWD0;A0A1B0GWH0	P61160	ACTR2	30.6236	0.794888	0.0344752	0.0762861	n.s.	AvM_do	n.s.	0.0439894	-0.32069	0.36468		changed in MR
P61163;R4GMT0;A0A1B0GVS3	P61163;R4GMT0;A0A1B0GVS3	ACTR1A	31.3245	0.0379963	0.539407	0.430796	AvC_do	n.s.	n.s.	-0.204603	-0.0711143	-0.133488		n.s.
P61201;P61201-2;B4DIH5;H0YKU5;H0YM03;H0YMC2	P61201;P61201-2;B4DIH5;H0YKU5	COPS2	29.6234	5.02765e-07	2.14751e-05	0.834201	AvC_do	AvM_do	n.s.	-0.574095	-0.52276	-0.0513349	AS specific	changed in MR
P61221;D6R9I9;D6RGF4	P61221;D6R9I9	ABCE1	29.4044	0.000648206	0.0867436	0.338552	AvC_do	n.s.	n.s.	-0.528345	-0.283698	-0.244647		n.s.
P61224-3;P61224;E7ESV4;F5H7Y6;F5GX62;A6NIZ1;F5H004;P61224-2;P61224-4;F5H823;B7ZB78;F5H6R7;F5GYB5;F5H4H0;F5GYH7;F5H077;F5GWU8;F5H491;F5H0B7;F5H500;F8WBC0	P61224-3;P61224;E7ESV4;F5H7Y6;F5GX62;A6NIZ1;F5H004;P61224-2;P61224-4;F5H823;B7ZB78;F5H6R7	RAP1B	27.1395	0.610454	0.285574	0.779135	n.s.	n.s.	n.s.	-0.188409	-0.387112	0.198703		n.s.
P61225	P61225	RAP2B	26.0187	0.876819	0.362795	0.671056	n.s.	n.s.	n.s.	-0.0566554	-0.299583	0.242928		n.s.
P61247;D6RG13;D6RAT0;E9PFI5;H0Y8L7;D6RB09;D6RAS7;D6RED7;D6RI02;D6RGE0	P61247;D6RG13;D6RAT0;E9PFI5;H0Y8L7;D6RB09	RPS3A	30.1337	0.00297307	0.0189173	0.834489	AvC_do	AvM_do	n.s.	-0.568626	-0.478804	-0.0898216	AS specific	changed in MR
P61254;J3QRI7;J3QQQ9;J3QQV1;J3QRC4;J3KSS0	P61254;J3QRI7;J3QQQ9;J3QQV1;J3QRC4	RPL26	29.0703	0.213598	0.149492	0.906699	n.s.	n.s.	n.s.	-0.447015	-0.540146	0.0931309		n.s.
P61289;P61289-2;K9J957;P61289-3;K7ESG5;K7ENH2;B3KQ25;A0A087WTV2;K7EMD0;K7EPX6;K7EKR3;B7Z8D3;K7EJF8	P61289;P61289-2;K9J957;P61289-3;K7ESG5;K7ENH2;B3KQ25;A0A087WTV2	PSME3	25.3012	0.000161902	0.125227	0.151124	AvC_do	n.s.	n.s.	-1.69471	-0.732487	-0.962226		n.s.
P61313;A0A2R8YEM3;E7EQV9;E7EX53;A0A2R8Y738;P61313-2;E7ERA2	P61313;A0A2R8YEM3;E7EQV9;E7EX53;A0A2R8Y738;P61313-2	RPL15	29.7064	0.00551824	0.374684	0.265595	AvC_do	n.s.	n.s.	-0.626797	-0.225824	-0.400973		n.s.
P61326;Q96A72;F5H6P7;F5H6N1;F5H3U9;P61326-2	P61326;Q96A72;F5H6P7;F5H6N1	MAGOH	26.5299	0.817693	0.442327	0.521616	n.s.	n.s.	n.s.	-0.0936313	0.298066	-0.391697		n.s.
P61328-2;P61328;C9JUK8;C9JEN8;C9JIN3;Q92915;Q92915-2	P61328-2;P61328;C9JUK8;C9JEN8	FGF12	26.1175	5.67609e-05	0.0171103	0.350905	AvC_do	AvM_do	n.s.	-2.30899	-1.43268	-0.876314	AS specific	changed in MR
P61353;K7ELC7;K7EQQ9;K7ERY7	P61353;K7ELC7	RPL27	29.6542	0.000260058	0.0463387	0.350384	AvC_do	AvM_do	n.s.	-0.790373	-0.457195	-0.333178	AS specific	changed in MR
P61421;R4GN72;F5GYQ1;J3QL14;H3BQJ1;H3BQB4;H3BSG7	P61421;R4GN72;F5GYQ1;J3QL14;H3BQJ1	ATP6V0D1	26.0936	0.024503	0.108268	0.811181	AvC_do	n.s.	n.s.	-0.779874	-0.598702	-0.181172		n.s.
P61457	P61457	PCBD1	30.118	0.127757	0.83025	0.247237	n.s.	n.s.	n.s.	-0.199315	0.0348154	-0.234131		n.s.
P61586;C9JNR4;C9JX21;C9JRM1	P61586;C9JNR4;C9JX21	RHOA	30.3171	0.376364	0.9706	0.594706	n.s.	n.s.	n.s.	0.12371	-0.00594831	0.129658		n.s.
P61604;B8ZZL8;B8ZZ54	P61604;B8ZZL8;B8ZZ54	HSPE1	31.4891	0.133535	0.572844	0.145566	n.s.	n.s.	n.s.	-0.338069	0.1478	-0.485868		n.s.
P61626;F8VV32;A0A0B4J259	P61626;F8VV32;A0A0B4J259	LYZ	28.7183	0.00192938	0.00256222	0.964307	AvC_up	AvM_up	n.s.	2.02156	2.10224	-0.0806778	AS specific	changed in AS
P61758	P61758	VBP1	29.8344	0.0533676	0.553943	0.484095	n.s.	n.s.	n.s.	-0.337006	-0.121155	-0.215852		n.s.
P61925	P61925	PKIA	25.1468	0.572959	0.00838492	0.151946	n.s.	AvM_up	n.s.	0.288369	1.28125	-0.992878		changed in AS
P61952;P63211	P61952	GNG11	26.0517	0.963978	0.778205	0.899284	n.s.	n.s.	n.s.	0.0297298	0.182698	-0.152968		n.s.
P61960;H0Y614;P61960-2	P61960;H0Y614;P61960-2	UFM1	29.5548	0.0311895	0.371721	0.521616	AvC_do	n.s.	n.s.	-0.70376	-0.326847	-0.376913		n.s.
P61962;A0A087WWI6;P61962-2	P61962;A0A087WWI6	DCAF7	24.4623	0.296657	0.664617	0.793799	n.s.	n.s.	n.s.	-0.480263	-0.231634	-0.248629		n.s.
P61970;H3BRV9	P61970;H3BRV9	NUTF2	29.8908	0.0914364	0.540365	0.595305	n.s.	n.s.	n.s.	-0.573227	-0.241329	-0.331898		n.s.
P61978-3;Q5T6W2	P61978-3;Q5T6W2	HNRNPK	32.7434	0.615764	0.00690349	0.0114302	n.s.	AvM_do	MvC_up	0.0430983	-0.218668	0.261766	MR sepcific	changed in MR
P61981	P61981	YWHAG	32.7095	0.411681	0.0421033	0.462847	n.s.	AvM_up	n.s.	0.142023	0.349299	-0.207276		changed in AS
P62070;P62070-4;P62070-3;P62070-2;E9PK85;E9PQ87;E9PQK5;E9PQC5	P62070;P62070-4;P62070-3;P62070-2;E9PK85	RRAS2	29.3556	0.00872193	0.00763619	0.93106	AvC_up	AvM_up	n.s.	0.42829	0.462415	-0.0341252	AS specific	changed in AS
P62072	P62072	TIMM10	27.1643	0.132831	0.538546	0.679362	n.s.	n.s.	n.s.	0.435046	0.205912	0.229134		n.s.
P62081;B5MCP9	P62081;B5MCP9	RPS7	31.5332	0.0258497	0.281354	0.575236	AvC_do	n.s.	n.s.	-0.412136	-0.219771	-0.192366		n.s.
P62136;P62136-2;P62136-3;E9PMD7	P62136;P62136-2;P62136-3;E9PMD7	PPP1CA	26.3858	0.104216	0.540365	0.623443	n.s.	n.s.	n.s.	-0.556658	-0.242819	-0.313839		n.s.
P62140;E7ETD8;C9JP48;C9J9S3	P62140;E7ETD8	PPP1CB	31.8998	0.24532	0.202945	0.944388	n.s.	n.s.	n.s.	0.13091	0.150385	-0.0194744		n.s.
P62191;P62191-2	P62191;P62191-2	PSMC1	30.6596	0.22192	0.0118125	0.407941	n.s.	AvM_do	n.s.	-0.182594	-0.386812	0.204218		changed in MR
P62195;P62195-2;J3QQM1;J3QSA9;J3KRP2;J3QLH6;J3QSE0;J3QRW1;J3QRR3;J3KTQ9	P62195;P62195-2;J3QQM1;J3QSA9;J3KRP2	PSMC5	31.0056	0.995015	0.0013898	0.0113177	n.s.	AvM_do	MvC_up	0.00061723	-0.271667	0.272284	MR sepcific	changed in MR
P62241;Q5JR95	P62241;Q5JR95	RPS8	30.6386	2.72742e-05	0.00242075	0.579542	AvC_do	AvM_do	n.s.	-0.669105	-0.508377	-0.160728	AS specific	changed in MR
P62244;I3L3P7;I3L246;H3BV27;H3BT37;I3L303;H3BVC7	P62244;I3L3P7;I3L246	RPS15A	30.0239	0.000317306	0.042333	0.392706	AvC_do	AvM_do	n.s.	-0.836704	-0.502168	-0.334536	AS specific	changed in MR
P62249;M0R210;M0R3H0;M0R1M5;Q6IPX4;M0QX76	P62249;M0R210;M0R3H0	RPS16	30.6512	3.34955e-07	0.000871531	0.261909	AvC_do	AvM_do	n.s.	-0.659259	-0.44013	-0.219129	AS specific	changed in MR
P62253;I3L0Q0;I3L2Q4;K7EPR7;I3L2H7	P62253	UBE2G1	26.2635	0.31171	0.265033	0.950559	n.s.	n.s.	n.s.	-0.316058	-0.364369	0.0483119		n.s.
P62256;C9JZY6;P62256-2;H7C4M9;C9JZG9;C9J8Q9;A0A3B3IU20	P62256;C9JZY6;P62256-2;H7C4M9;C9JZG9	UBE2H	27.3204	0.601529	0.187152	0.663316	n.s.	n.s.	n.s.	0.193344	0.472754	-0.279409		n.s.
P62258;P62258-2;B4DJF2;I3L3T1;K7EIT4;I3L0W5	P62258;P62258-2;B4DJF2;I3L3T1	YWHAE	34.4472	0.0699462	0.701072	0.125449	n.s.	n.s.	n.s.	0.101691	-0.025839	0.12753		n.s.
P62266;D6RD47;D6RDJ2;D6RIX0;D6R9I7	P62266;D6RD47;D6RDJ2;D6RIX0;D6R9I7	RPS23	28.5563	0.193632	0.798595	0.582477	n.s.	n.s.	n.s.	-0.43082	-0.103354	-0.327466		n.s.
P62269;Q5GGW2;A0A0G2JQH2;J3JS69	P62269	RPS18	30.8592	0.000118729	0.0691955	0.207637	AvC_do	n.s.	n.s.	-0.50813	-0.253443	-0.254687		n.s.
P62277;J3KMX5;E9PS50	P62277;J3KMX5	RPS13	30.7842	1.02803e-06	0.0910843	0.0158499	AvC_do	n.s.	MvC_do	-0.762076	-0.270116	-0.491959	shared	n.s.
P62280;M0QZC5;M0R1H5;M0R1H6	P62280;M0QZC5	RPS11	29.5406	0.833654	0.0219355	0.147163	n.s.	AvM_up	n.s.	0.0518967	0.503796	-0.451899		changed in AS
P62304;A6NHK2	P62304	SNRPE	27.5739	0.0328821	0.310019	0.584941	AvC_do	n.s.	n.s.	-0.985452	-0.518979	-0.466474		n.s.
P62306	P62306	SNRPF	26.8151	0.622097	0.640335	0.538968	n.s.	n.s.	n.s.	0.138707	-0.140775	0.279482		n.s.
P62310	P62310	LSM3	26.7763	0.499573	0.0715339	0.0627368	n.s.	n.s.	n.s.	0.244646	-0.639358	0.884004		n.s.
P62312	P62312	LSM6	24.6728	0.336005	0.911618	0.650177	n.s.	n.s.	n.s.	0.388115	0.0542659	0.333849		n.s.
P62314;J3QLI9;J3QLR7	P62314;J3QLI9	SNRPD1	28.9364	0.000807147	0.0124867	0.735486	AvC_do	AvM_do	n.s.	-1.01034	-0.79988	-0.210459	AS specific	changed in MR
P62316;P62316-2;K7ERG4	P62316;P62316-2;K7ERG4	SNRPD2	26.7873	0.0948623	0.323009	0.782756	n.s.	n.s.	n.s.	-0.566588	-0.367932	-0.198656		n.s.
P62318-2;P62318;H3BT13	P62318-2;P62318;H3BT13	SNRPD3	28.4779	0.0094308	0.0529806	0.811386	AvC_do	n.s.	n.s.	-0.52607	-0.420172	-0.105898		n.s.
P62328;CON__P21752	P62328	TMSB4X	30.9769	0.000207876	0.126753	0.1649	AvC_up	n.s.	n.s.	1.22406	0.535798	0.688259		n.s.
P62330	P62330	ARF6	27.3652	0.746476	0.817109	0.97088	n.s.	n.s.	n.s.	0.158915	0.121451	0.0374637		n.s.
P62424;Q5T8U3;Q5T8U2	P62424;Q5T8U3	RPL7A	30.7266	0.208061	0.69118	0.673898	n.s.	n.s.	n.s.	-0.164489	-0.0611125	-0.103377		n.s.
P62491;H3BSC1;H3BN38	P62491;H3BSC1	RAB11A	24.4183	0.0183727	0.0507312	0.905815	AvC_do	n.s.	n.s.	-0.990747	-0.875719	-0.115028		n.s.
P62495;B7Z7P8;D6RCB3	P62495;B7Z7P8	ETF1	28.6271	0.0219516	0.636269	0.281739	AvC_do	n.s.	n.s.	-0.424005	-0.105523	-0.318482		n.s.
P62701	P62701	RPS4X	30.7891	7.09952e-05	0.0100402	0.459386	AvC_do	AvM_do	n.s.	-0.473	-0.320476	-0.152524	AS specific	changed in MR
P62714;H0YC23;E7ESG8;E5RHC1;E5RFI3;E5RHP4;H0YBN9;E5RJX4	P62714	PPP2CB	30.5592	0.919175	0.0445963	0.189948	n.s.	AvM_up	n.s.	0.0163591	0.262155	-0.245796		changed in AS
P62736;F6UVQ4;F6QUT6	P62736	ACTA2	31.3809	0.836878	0.439957	0.532827	n.s.	n.s.	n.s.	0.198604	-0.710234	0.908839		n.s.
P62750;H7BY10;K7EJV9;K7ERT8;A8MUS3;K7EMA7	P62750;H7BY10;K7EJV9;K7ERT8;A8MUS3;K7EMA7	RPL23A	29.6009	0.00325894	0.0368579	0.729809	AvC_do	AvM_do	n.s.	-0.547461	-0.414981	-0.13248	AS specific	changed in MR
P62753;A2A3R5;A2A3R7	P62753;A2A3R5;A2A3R7	RPS6	29.7774	0.000558481	0.000565833	0.909168	AvC_do	AvM_do	n.s.	-0.545942	-0.586741	0.0407988	AS specific	changed in MR
P62760;E9PE24;E7ER47;E5RJA1;E5RJF1	P62760;E9PE24;E7ER47	VSNL1	26.2146	0.00994648	0.530637	0.244554	AvC_do	n.s.	n.s.	-1.08923	-0.312892	-0.776339		n.s.
P62805	P62805	HIST1H4A	34.8472	0.035619	0.0471369	0.995038	AvC_do	AvM_do	n.s.	-0.262591	-0.264217	0.00162637	AS specific	changed in MR
P62820;E7END7;P62820-2;P62820-3	P62820;E7END7;P62820-2;P62820-3	RAB1A	28.3725	0.0752188	0.9655	0.237789	n.s.	n.s.	n.s.	-0.345292	0.0102019	-0.355494		n.s.
P62829;J3KTJ3;C9JD32;J3KT29;B9ZVP7;J3QQT9	P62829;J3KTJ3;C9JD32;J3KT29	RPL23	28.9828	0.00752952	0.00616924	0.918876	AvC_do	AvM_do	n.s.	-0.691323	-0.752999	0.0616758	AS specific	changed in MR
P62834;A0A075B6Q0	P62834;A0A075B6Q0	RAP1A	31.658	0.622734	0.17432	0.187571	n.s.	n.s.	n.s.	0.0616607	-0.163725	0.225386		n.s.
P62851	P62851	RPS25	29.9009	6.51514e-07	2.04281e-07	0.696979	AvC_do	AvM_do	n.s.	-0.738506	-0.848388	0.109881	AS specific	changed in MR
P62854	P62854	RPS26	27.1552	0.764626	0.412452	0.467269	n.s.	n.s.	n.s.	-0.199509	0.526452	-0.725961		n.s.
P62857	P62857	RPS28	28.9815	0.00750818	0.221833	0.442719	AvC_do	n.s.	n.s.	-0.440101	-0.219935	-0.220166		n.s.
P62873;P62873-2;F6UT28;B1AKQ8;F6X3N5;B3KVK2	P62873;P62873-2;F6UT28;B1AKQ8;F6X3N5	GNB1	30.6309	0.908576	0.110395	0.234734	n.s.	n.s.	n.s.	-0.0245506	0.281577	-0.306128		n.s.
P62877	P62877	RBX1	25.7469	0.444317	0.704604	0.875933	n.s.	n.s.	n.s.	-0.32984	-0.18322	-0.14662		n.s.
P62879;C9JXA5;C9JIS1;E7EP32;C9JZN1;P62879-2	P62879;C9JXA5;C9JIS1;E7EP32;C9JZN1	GNB2	26.9349	0.751002	0.719946	0.978487	n.s.	n.s.	n.s.	-0.17637	-0.206316	0.0299458		n.s.
P62888;E5RI99;A0A0B4J213;A0A0C4DH44;E5RJH3	P62888;E5RI99	RPL30	27.0471	0.953914	0.091069	0.229557	n.s.	n.s.	n.s.	-0.0281389	0.689826	-0.717965		n.s.
Q59GN2;P62891	Q59GN2;P62891	RPL39P5	27.0299	0.0002537	0.0867436	0.237789	AvC_do	n.s.	n.s.	-1.57542	-0.78257	-0.792854		n.s.
P62899;H7C2W9;C9JU56;B7Z4E3;B7Z4C8;P62899-3;P62899-2;B8ZZK4	P62899;H7C2W9;C9JU56;B7Z4E3;B7Z4C8;P62899-3;P62899-2;B8ZZK4	RPL31	28.8121	0.858859	0.849435	0.992876	n.s.	n.s.	n.s.	-0.102922	-0.111458	0.00853564		n.s.
P62906	P62906	RPL10A	30.2909	0.00184841	0.462743	0.13144	AvC_do	n.s.	n.s.	-0.34044	-0.0924964	-0.247944		n.s.
P62913;Q5VVC8;P62913-2	P62913;Q5VVC8;P62913-2	RPL11	30.2839	0.00416233	0.0622302	0.652443	AvC_do	n.s.	n.s.	-0.402548	-0.280034	-0.122514		n.s.
P62917;E9PKU4;E9PKZ0;G3V1A1;E9PP36	P62917;E9PKU4;E9PKZ0;G3V1A1;E9PP36	RPL8	29.8257	0.128022	0.318794	0.843522	n.s.	n.s.	n.s.	-0.262846	-0.18766	-0.0751859		n.s.
P62937;F8WE65;C9J5S7;A0A0B4J2A2;A0A075B767;Q9Y536;P0DN37;E5RIZ5	P62937;F8WE65;C9J5S7	PPIA	34.3017	0.34295	0.311275	0.96548	n.s.	n.s.	n.s.	-0.114779	-0.128387	0.0136083		n.s.
P62942;Q5W0X3;A0A087WZM5;Q1JUQ3;A0A087WTS4;Q5VVH2;A0A087WV48	P62942;Q5W0X3;A0A087WZM5	FKBP1A	31.169	0.302798	0.341342	0.992547	n.s.	n.s.	n.s.	0.190116	0.186706	0.00340939		n.s.
P62979;J3QS39;J3QTR3;F5H6Q2;F5GYU3;F5H2Z3;F5H265;B4DV12;F5H388;F5H747;F5GXK7;J3QKN0;Q5PY61;Q96C32;P0CG47;P0CG48;M0R1V7;Q49A90	P62979;J3QS39;J3QTR3;F5H6Q2;F5GYU3;F5H2Z3;F5H265;B4DV12;F5H388;F5H747;F5GXK7;J3QKN0;Q5PY61;Q96C32;P0CG47;P0CG48;M0R1V7;Q49A90	RPS27A	34.2883	0.825419	0.152138	0.467498	n.s.	n.s.	n.s.	0.0244665	0.143355	-0.118889		n.s.
P62993;P62993-2;J3KT38;J3QRL5;J3QLF6	P62993;P62993-2;J3KT38	GRB2	28.6178	0.480972	0.0109542	0.0103587	n.s.	AvM_up	MvC_do	-0.115766	0.407354	-0.52312	MR sepcific	changed in AS
P62995-3;P62995;H7BXF3;H7C2L4	P62995-3;P62995;H7BXF3;H7C2L4	TRA2B	26.0586	0.217231	0.525331	0.808298	n.s.	n.s.	n.s.	-0.386935	-0.22619	-0.160745		n.s.
P63000-2;P63000;P60763	P63000-2;P63000	RAC1	30.359	0.0682151	0.00444995	0.517168	n.s.	AvM_do	n.s.	-0.306266	-0.500555	0.194289		changed in MR
P63010;P63010-2;A0A087X253;P63010-3;A0A087WU93;A0A087WZQ6;A0A087WYD1;K7ERB2;K7EN71;K7EJX1;K7EJ01;A0A087WXS3;K7EKZ5	P63010;P63010-2;A0A087X253;P63010-3;A0A087WU93;A0A087WZQ6;A0A087WYD1	AP2B1	31.2559	0.390514	0.0456927	0.495657	n.s.	AvM_do	n.s.	-0.211022	-0.490306	0.279284		changed in MR
P63092;P63092-4;Q5JWF2;A0A0A0MR13;S4R3E3;Q5JWE9;S4R3V9;P38405;P38405-2;Q5JWD1;H0Y7E8;K7EQ80;K7EPE2	P63092;P63092-4;Q5JWF2	GNAS	31.0324	0.000253494	2.75726e-05	0.584415	AvC_do	AvM_do	n.s.	-0.35829	-0.456864	0.0985749	AS specific	changed in MR
P63096;P63096-2;A0A3B3ITM0;A0A3B3IUA8	P63096;P63096-2;A0A3B3ITM0	GNAI1	24.5133	0.113906	0.494796	0.103179	n.s.	n.s.	n.s.	-0.697401	0.344979	-1.04238		n.s.
P63104;E7EX29;B0AZS6;P63104-2;B7Z2E6;H0YB80;E7ESK7;E9PD24;E7EVZ2;E5RIR4;E5RGE1	P63104;E7EX29;B0AZS6;P63104-2;B7Z2E6;H0YB80	YWHAZ	33.1309	0.0655524	0.403733	0.632382	n.s.	n.s.	n.s.	0.17374	0.0884818	0.0852578		n.s.
P63151;E5RFR9;E5RIY1;A0A1W2PQI2;E5RHQ2;E5RJV2	P63151	PPP2R2A	30.4633	0.052325	0.0193739	0.808298	n.s.	AvM_do	n.s.	-0.224856	-0.285776	0.0609198		changed in MR
P63172	P63172	DYNLT1	28.599	0.03898	0.201904	0.740554	AvC_do	n.s.	n.s.	-0.814689	-0.546413	-0.268276		n.s.
P63173;J3KT73;J3QL01;J3KSP2	P63173;J3KT73;J3QL01	RPL38	27.7036	0.103354	0.29953	0.0483827	n.s.	n.s.	MvC_do	-0.423067	0.293008	-0.716075		n.s.
P63208;E5RJR5;E7ERH2;F8W8N3;P63208-2;E5RGM3;E5RHM3;E5RGM4	P63208;E5RJR5;E7ERH2;F8W8N3;P63208-2	SKP1	29.6987	0.645554	0.834777	0.690807	n.s.	n.s.	n.s.	0.104138	-0.0525632	0.156701		n.s.
P63218	P63218	GNG5	24.7412	0.985292	0.902018	0.961963	n.s.	n.s.	n.s.	0.0119964	0.075343	-0.0633466		n.s.
Q8WVC2;P63220;Q9BYK1;Q9BYK2	Q8WVC2;P63220;Q9BYK1	RPS21	29.1251	5.863e-05	0.134779	0.0914337	AvC_do	n.s.	n.s.	-0.632191	-0.24937	-0.382821		n.s.
P63241;I3L397;I3L504;P63241-2;Q6IS14;F8WCJ1;C9J7B5	P63241;I3L397;I3L504;P63241-2;Q6IS14;F8WCJ1;C9J7B5	EIF5A	30.9903	0.178197	0.99996	0.420367	n.s.	n.s.	n.s.	-0.35819	1.05729e-05	-0.3582		n.s.
P63244;J3KPE3;H0Y8W2;H0YAF8;H0YAM7;D6RAC2;D6REE5;D6RHH4;D6RFZ9;D6RF23;H0Y8R5;D6RAU2;E9PD14;D6RBD0;H0Y9P0;D6RHJ5;D6RGK8;D6R909;D6RDI0	P63244;J3KPE3;H0Y8W2;H0YAF8;H0YAM7;D6RAC2;D6REE5;D6RHH4	RACK1	30.9302	6.33747e-05	0.836415	0.00470483	AvC_do	n.s.	MvC_do	-0.390477	-0.0250611	-0.365416	shared	n.s.
P63261;I3L3I0;I3L1U9;I3L3R2	P63261;I3L3I0;I3L1U9	ACTG1	34.8966	0.934849	0.679066	0.862602	n.s.	n.s.	n.s.	-0.0183009	-0.0870178	0.0687169		n.s.
P63313	P63313	TMSB10	28.4431	0.96236	0.867003	0.906699	n.s.	n.s.	n.s.	-0.0318237	0.110276	-0.1421		n.s.
P63316;C9JDI3	P63316;C9JDI3	TNNC1	35.9241	0.365199	0.290529	0.160024	n.s.	n.s.	n.s.	-0.217471	0.26305	-0.480521		n.s.
P67775;P67775-2	P67775;P67775-2	PPP2CA	24.2457	0.361497	0.898536	0.530029	n.s.	n.s.	n.s.	-0.540253	0.0928111	-0.633064		n.s.
P67809;C9J5V9;Q9Y2T7	P67809	YBX1	28.2739	0.090457	3.70345e-05	0.0403212	n.s.	AvM_up	MvC_do	0.434087	1.16435	-0.730263	MR sepcific	changed in AS
Q5SRQ6;P67870;Q5SRQ3;N0E472;A0A0G2JM12;N0E644;A0A0G2JM58	Q5SRQ6;P67870;Q5SRQ3;N0E472;A0A0G2JM12	CSNK2B	27.9183	0.0253444	0.307245	0.545175	AvC_do	n.s.	n.s.	-0.923631	-0.467499	-0.456132		n.s.
P67936-2;K7ENT6;A0A2R8YE05;A0A2R8YEU4;K7ERG3;K7ELP0	P67936-2;K7ENT6;A0A2R8YE05;A0A2R8YEU4;K7ERG3	TPM4	27.9313	0.0350476	0.0624374	0.963515	AvC_up	n.s.	n.s.	0.637865	0.599262	0.0386032		n.s.
P68032	P68032	ACTC1	39.6059	0.137173	0.0960782	0.0156326	n.s.	n.s.	MvC_do	-0.115129	0.135162	-0.250291		n.s.
P68036-2	P68036-2	UBE2L3	30.7664	0.00149545	0.00399787	0.965161	AvC_up	AvM_up	n.s.	0.377902	0.363516	0.0143868	AS specific	changed in AS
P68104;Q5VTE0;A0A087WVQ9;A0A087WV01;Q5JR01;A6PW80	P68104;Q5VTE0;A0A087WVQ9;A0A087WV01	EEF1A1	32.5484	0.382056	0.230209	0.874065	n.s.	n.s.	n.s.	0.167467	0.234106	-0.0666393		n.s.
P68133;A6NL76	P68133;A6NL76	ACTA1	34.1352	0.854316	0.764387	0.955472	n.s.	n.s.	n.s.	0.040152	0.0666692	-0.0265172		n.s.
P68363;P68363-2;C9JDS9	P68363;P68363-2	TUBA1B	30.5974	0.809817	0.195261	0.538232	n.s.	n.s.	n.s.	0.060807	0.297318	-0.236511		n.s.
P68366-2;P68366;C9JEV8;C9JQ00;C9JJQ8;C9JDL2	P68366-2;P68366	TUBA4A	32.4635	0.793176	0.779267	0.98743	n.s.	n.s.	n.s.	0.0506724	0.0568222	-0.00614976		n.s.
P68371;M0R2D3;M0R2T4;A0A075B724	P68371	TUBB4B	35.6528	0.395525	0.313164	0.932427	n.s.	n.s.	n.s.	-0.117371	-0.143986	0.0266156		n.s.
P68402;P68402-3;P68402-2;P68402-4;J3KNE3	P68402;P68402-3;P68402-2;P68402-4	PAFAH1B2	29.566	0.071737	0.15419	0.901054	n.s.	n.s.	n.s.	-0.616973	-0.519778	-0.0971948		n.s.
P68871;A0A2R8Y7R2;F8W6P5;A0A0J9YWK4	P68871;A0A2R8Y7R2;F8W6P5	HBB	37.2441	2.48772e-08	0.990268	9.22124e-06	AvC_up	n.s.	MvC_up	2.24598	0.00614166	2.23984	shared	n.s.
P69905;A0A2R8Y7C0	P69905;A0A2R8Y7C0	HBA1	36.8632	1.99317e-07	0.886467	2.41139e-05	AvC_up	n.s.	MvC_up	2.03581	-0.0680731	2.10388	shared	n.s.
P78310;P78310-2;P78310-6;P78310-5;P78310-4;P78310-3	P78310;P78310-2;P78310-6	CXADR	25.3833	0.17843	0.900513	0.495657	n.s.	n.s.	n.s.	-0.582822	-0.0690863	-0.513735		n.s.
P78318	P78318	IGBP1	24.833	0.0470084	0.128153	0.878251	AvC_do	n.s.	n.s.	-0.857588	-0.702078	-0.15551		n.s.
P78344;D3DQV9;P78344-2;H0Y3P2;H0YCH5;H0YD77;H0YEC5;E9PKF8;H0YE22;H0YCF8;H0YEN8;H0YDC0;H0YD99;H0YE44;H0YEW3;H0YEI7	P78344;D3DQV9;P78344-2;H0Y3P2	EIF4G2	29.3732	0.0737946	0.224842	0.828181	n.s.	n.s.	n.s.	-0.357003	-0.261017	-0.0959861		n.s.
P78347-2;P78347-4;P78347-3;P78347;P78347-5;C9J6M0	P78347-2;P78347-4;P78347-3;P78347	GTF2I	26.6591	0.00869	0.024238	0.92466	AvC_do	AvM_do	n.s.	-1.03197	-0.944608	-0.0873583	AS specific	changed in MR
P78356;P78356-2;A0A087WT35	P78356;P78356-2	PIP4K2B	26.5408	0.0790929	0.0691955	0.950559	n.s.	n.s.	n.s.	-0.693006	-0.756382	0.0633762		n.s.
P78371;P78371-2;F5GWF6;F8VQ14	P78371;P78371-2;F5GWF6;F8VQ14	CCT2	31.87	4.72226e-06	0.00222061	0.387138	AvC_do	AvM_do	n.s.	-0.402585	-0.278291	-0.124294	AS specific	changed in MR
P78406;E9PQ57;E9PPG9;B0QZ36;B0QZ37	P78406;E9PQ57;E9PPG9	RAE1	24.3239	0.662778	0.306801	0.765627	n.s.	n.s.	n.s.	-0.200582	-0.454122	0.253539		n.s.
P78417;Q5TA02;P78417-3;P78417-2;Q5TA01	P78417;Q5TA02;P78417-3;P78417-2;Q5TA01	GSTO1	32.7049	0.919287	0.831459	0.958795	n.s.	n.s.	n.s.	0.0160593	0.033486	-0.0174267		n.s.
P78527;P78527-2;F5GX40;H0YG84	P78527;P78527-2	PRKDC	30.4642	0.000628181	5.68585e-05	0.563347	AvC_do	AvM_do	n.s.	-0.61226	-0.803075	0.190815	AS specific	changed in MR
P78560;F8VV49;F5H7C2;F8VVY5;P78560-2	P78560	CRADD	28.2522	0.102566	0.261492	0.851005	n.s.	n.s.	n.s.	-0.418841	-0.311346	-0.107495		n.s.
P80723;P80723-2;U3KQP0	P80723;P80723-2	BASP1	24.8607	0.000465093	0.119998	0.241741	AvC_up	n.s.	n.s.	1.71227	0.813389	0.898886		n.s.
P80748	P80748	IGLV3-21	26.0504	0.0675702	0.726628	0.404174	n.s.	n.s.	n.s.	1.12506	0.260527	0.86453		n.s.
P82663;E7EPW2;P82663-2;P82663-3	P82663;E7EPW2;P82663-2;P82663-3	MRPS25	28.4834	0.0137156	0.6337	0.0287952	AvC_do	n.s.	MvC_do	-0.484389	0.112786	-0.597174	shared	n.s.
P82664	P82664	MRPS10	27.8117	0.294646	0.697415	0.340994	n.s.	n.s.	n.s.	-0.313546	0.134907	-0.448452		n.s.
P82673;H0YG82;P82673-2	P82673;H0YG82;P82673-2	MRPS35	28.9501	0.0023776	0.00084435	0.798958	AvC_do	AvM_do	n.s.	-0.560863	-0.663354	0.10249	AS specific	changed in MR
P82675;P82675-2	P82675	MRPS5	28.2615	9.8549e-05	0.00159095	0.797363	AvC_do	AvM_do	n.s.	-1.00869	-0.865902	-0.142789	AS specific	changed in MR
P82909	P82909	MRPS36	31.7725	0.0600285	0.361012	0.650019	n.s.	n.s.	n.s.	-0.273526	-0.147597	-0.125929		n.s.
P82912-2;P82912;H0YL99;P82912-3	P82912-2;P82912;H0YL99	MRPS11	25.8987	0.125844	0.994773	0.342707	n.s.	n.s.	n.s.	-0.724778	0.00385619	-0.728634		n.s.
P82914	P82914	MRPS15	27.2783	0.519607	0.406192	0.920777	n.s.	n.s.	n.s.	-0.146794	-0.19523	0.0484361		n.s.
P82921	P82921	MRPS21	27.4232	0.131479	0.186872	0.96863	n.s.	n.s.	n.s.	-0.576637	-0.537295	-0.0393416		n.s.
P82932	P82932	MRPS6	27.3848	0.0244582	0.886467	0.176702	AvC_do	n.s.	n.s.	-0.655885	-0.0535819	-0.602303		n.s.
P82933;H7BZC4	P82933	MRPS9	29.0549	9.26926e-08	3.11582e-05	0.582477	AvC_do	AvM_do	n.s.	-1.06907	-0.877442	-0.191629	AS specific	changed in MR
P82979;F8VZQ9;F8VS12	P82979;F8VZQ9	SARNP	26.0867	0.520111	0.511229	0.978487	n.s.	n.s.	n.s.	-0.236109	-0.257081	0.0209723		n.s.
P83111;P83111-2;H0YNN5	P83111;P83111-2	LACTB	31.4088	0.171135	0.437635	0.812358	n.s.	n.s.	n.s.	-0.223608	-0.141397	-0.0822105		n.s.
P84077;P61204;F5H423;P61204-2;F5H0C7;H0YGG7	P84077;P61204;F5H423;P61204-2	ARF1	31.9801	0.964255	0.582221	0.730173	n.s.	n.s.	n.s.	0.00534946	-0.061436	0.0667855		n.s.
P84085;C9J1Z8;F5H1V1;F8WDB3	P84085;C9J1Z8	ARF5	27.0519	0.241037	0.292789	0.979593	n.s.	n.s.	n.s.	0.360724	0.343689	0.0170354		n.s.
P84090;G3V279	P84090;G3V279	ERH	28.5692	0.919287	0.0249732	0.0838519	n.s.	AvM_up	n.s.	-0.02742	0.508331	-0.535751		changed in AS
P84095	P84095	RHOG	27.325	0.801291	0.472488	0.808298	n.s.	n.s.	n.s.	0.0971533	0.269445	-0.172291		n.s.
P84098;J3QR09;J3KTE4	P84098;J3QR09;J3KTE4	RPL19	29.7188	0.00516227	0.675592	0.0156326	AvC_do	n.s.	MvC_do	-0.480381	0.0880095	-0.568391	shared	n.s.
P84103-2;P84103;A0A087X2D0	P84103-2;P84103;A0A087X2D0	SRSF3	28.286	0.498263	0.533146	0.998566	n.s.	n.s.	n.s.	-0.357532	-0.355555	-0.00197718		n.s.
P84157-2;K7EQX8	P84157-2	MXRA7	29.7776	3.21296e-09	2.5486e-06	0.532032	AvC_up	AvM_up	n.s.	1.61796	1.33521	0.282746	AS specific	changed in AS
P98095-2;P98095;H7BXL0;C9JQS6;H7C1A3	P98095-2;P98095	FBLN2	30.0123	0.000307247	0.963064	0.00608307	AvC_up	n.s.	MvC_up	1.27218	-0.0206719	1.29285	shared	n.s.
P98155;P98155-2;Q5VVF8	P98155;P98155-2	VLDLR	28.381	0.000247138	0.263377	0.0906119	AvC_do	n.s.	n.s.	-1.22726	-0.407229	-0.820031		n.s.
P98160;H7BYA5;H0Y5A9	P98160	HSPG2	35.4923	0.907619	0.0267123	0.144056	n.s.	AvM_do	n.s.	-0.0182302	-0.284476	0.266246		changed in MR
P98175-5;P98175-2;P98175;P98175-4;P98175-3	P98175-5;P98175-2;P98175;P98175-4;P98175-3	RBM10	24.7109	0.452384	0.549323	0.96717	n.s.	n.s.	n.s.	-0.479524	-0.41492	-0.064604		n.s.
P98179	P98179	RBM3	31.7045	0.274928	0.275154	0.116533	n.s.	n.s.	n.s.	-0.283354	0.297928	-0.581282		n.s.
P99999;C9JFR7	P99999;C9JFR7	CYCS	34.7136	0.00497974	0.0365139	0.793799	AvC_do	AvM_do	n.s.	-0.568469	-0.453107	-0.115362	AS specific	changed in MR
Q00013;A8MTH1;C9J9J4;C9JB34;A6NFY0;F8WC84;F8WDV6	Q00013	MPP1	25.5755	0.633389	0.269963	0.745917	n.s.	n.s.	n.s.	-0.234378	-0.52718	0.292802		n.s.
Q00059;Q00059-2;H7BYN3	Q00059;Q00059-2;H7BYN3	TFAM	30.1999	2.43874e-05	0.0409891	0.164439	AvC_do	AvM_do	n.s.	-0.644081	-0.327744	-0.316338	AS specific	changed in MR
Q00169;F5GWE5;I3L471;I3L4U7	Q00169;F5GWE5	PITPNA	28.8126	0.212073	0.663731	0.247575	n.s.	n.s.	n.s.	0.197331	-0.0811217	0.278453		n.s.
Q00325;Q00325-2;F8VVM2;F8VZL5;F8VWR4;F8VWQ0;F8VY00;F8VYH5	Q00325;Q00325-2;F8VVM2	SLC25A3	35.5639	0.00506656	0.917262	0.0627368	AvC_do	n.s.	n.s.	-0.311878	-0.0147985	-0.29708		n.s.
Q00577	Q00577	PURA	30.3211	0.52477	0.160163	0.142762	n.s.	n.s.	n.s.	0.10116	-0.219445	0.320606		n.s.
Q00587-2;Q00587;B0QYC6;B0QYC7;B0QYC8	Q00587-2;Q00587	CDC42EP1	24.3206	0.367291	0.0259786	0.410443	n.s.	AvM_do	n.s.	-0.389611	-0.961044	0.571433		changed in MR
Q00610-2;Q00610;A0A087WVQ6;J3KS13;K7EJJ5;J3KSQ2;J3KRF5;J3QL20;F5H5N6	Q00610-2;Q00610;A0A087WVQ6	CLTC	34.1658	0.15997	0.0320009	0.663954	n.s.	AvM_do	n.s.	-0.159873	-0.253605	0.0937319		changed in MR
Q00688;G3V5F2	Q00688	FKBP3	30.544	0.696963	0.262618	0.295503	n.s.	n.s.	n.s.	0.0588321	-0.16102	0.219852		n.s.
Q00765;E2QRG8;B7Z510;H0Y8J8;Q00765-2;B7Z332	Q00765;E2QRG8	REEP5	30.9291	0.469445	0.360105	0.250383	n.s.	n.s.	n.s.	-0.143637	0.187416	-0.331053		n.s.
Q00796;H0YLA4;H0YKB3;Q00796-2	Q00796;H0YLA4	SORD	28.5383	0.014292	0.495273	0.305717	AvC_up	n.s.	n.s.	0.436941	0.141735	0.295207		n.s.
Q00839;Q00839-2;A0A1X7SBS1;A0A1W2PPS1;A0A1W2PP35;A0A1W2PPL4;A0A1W2PPH7;A0A1W2PQL0;A0A1W2PP34;A0A1W2PQ74;A0A1W2PRZ7;A0A1W2PQD4;A0A1W2PRI6;A0A087WZF3;A0A087WVI9;A0A1W2PNG3;A0A1W2PP22	Q00839;Q00839-2;A0A1X7SBS1;A0A1W2PPS1;A0A1W2PP35;A0A1W2PPL4;A0A1W2PPH7;A0A1W2PQL0;A0A1W2PP34;A0A1W2PQ74;A0A1W2PRZ7	HNRNPU	31.6176	0.0917759	0.00539551	0.486302	n.s.	AvM_do	n.s.	-0.169786	-0.293024	0.123239		changed in MR
Q00G26	Q00G26	PLIN5	26.2907	0.0348475	0.00028791	0.237789	AvC_do	AvM_do	n.s.	-0.96148	-1.80435	0.842873	AS specific	changed in MR
Q01082;A0A087WUZ3;F8W6C1	Q01082;A0A087WUZ3	SPTBN1	35.4835	0.0680055	0.00224807	0.000118605	n.s.	AvM_do	MvC_up	0.114515	-0.202847	0.317362	MR sepcific	changed in MR
Q01082-2;Q01082-3	Q01082-2;Q01082-3	SPTBN1	25.5917	0.481687	0.195272	0.761423	n.s.	n.s.	n.s.	0.256821	0.471655	-0.214833		n.s.
Q01085-2;Q01085;E7ETJ9;A6NKZ9;E7ETC0	Q01085-2;Q01085;E7ETJ9	TIAL1	25.8701	0.0277235	0.211035	0.667374	AvC_do	n.s.	n.s.	-1.13669	-0.70453	-0.432161		n.s.
Q01105-2;Q01105-4;A0A087X027	Q01105-2;Q01105-4;A0A087X027	SET	30.3949	0.24278	0.534277	0.830939	n.s.	n.s.	n.s.	-0.154629	-0.0935437	-0.0610853		n.s.
[truncated: 1,668 more rows]

## Sheet: DiffExp_sex
					log2 fold changes				Benjamini-Hochberg corrected p-values				effects detail				summary effect heatmap		effect scatter plot
Protein IDs	Majority protein IDs	Protein names	Gene names	log2 Average Expression	MR_FvCON_F	MR_MvCON_M	AS_MvCON_M	AS_FvCON_F	AS_MvCON_M_adjP	MR_MvCON_M_adjP	AS_FvCON_F_adjP	MR_FvCON_F_adjP	AS_MvCON_M_effect	AS_FvCON_F_effect	MR_MvCON_M_effect	MR_FvCON_F_effect	III	II	AS	MR
A0A024R216;Q9Y3E1;H3BPM9;H3BPQ6	A0A024R216;Q9Y3E1	Hepatoma-derived growth factor-related protein 3	HDGFRP3	26.9311	1.42734	-0.15592	-0.19838	0.514224	0.800362	0.925537	0.419586	0.221741	n.s.	n.s.	n.s.	n.s.	n.s.	n.s.	n.s.	n.s.
A0A024R442;E7ETB3;Q9ULA0;F8WAN0;E5RJ35	A0A024R442;E7ETB3;Q9ULA0	Aspartyl aminopeptidase	DNPEP	30.2601	-0.305376	0.0833119	-0.494118	-0.583299	0.0419761	0.901125	0.0149566	0.620612	AS_MvCON_M_do	AS_FvCON_F_do	n.s.	n.s.	shared_do	n.s.	both	n.s.
A0A024R4E5;Q00341;Q00341-2;H0Y394;H7C0A4;C9JIZ1;C9J5E5;H7C2D1;C9JZI8;H7BZC3;C9JHZ8;C9JES8;C9JHS7;C9JT62;C9JK79;C9JBS3;C9JEJ8;C9JHN6;C9JMQ6;C9JQ82;C9JHS9;C9J739;H7C3D0	A0A024R4E5;Q00341;Q00341-2;H0Y394	Vigilin	HDLBP	30.0978	-0.110167	0.339124	0.297661	-0.655662	0.459914	0.61671	0.0604606	0.94865	n.s.	n.s.	n.s.	n.s.	n.s.	n.s.	n.s.	n.s.
A0A024R4K9;A0A087X266;Q9BXJ8-2;Q9BXJ8;A0A087WZA9;A0A087WV11;A0A087WZF4	A0A024R4K9;A0A087X266;Q9BXJ8-2;Q9BXJ8;A0A087WZA9	Transmembrane protein 120A	TMEM120A	28.336	0.200767	0.294385	-0.194568	-0.0178082	0.623297	0.647243	0.966293	0.859115	n.s.	n.s.	n.s.	n.s.	n.s.	n.s.	n.s.	n.s.
A0A024R4M0;P46781;B5MCT8;C9JM19;F2Z3C0;A8MXK4	A0A024R4M0;P46781;B5MCT8;C9JM19	40S ribosomal protein S9	RPS9	31.3645	-0.355184	-0.132118	-0.386975	-0.656491	0.0175178	0.707324	6.35099e-05	0.295272	AS_MvCON_M_do	AS_FvCON_F_do	n.s.	n.s.	shared_do	n.s.	both	n.s.
A0A024RA52;P25787;C9JCK5;H3BT36;H7C402	A0A024RA52;P25787;C9JCK5	Proteasome subunit alpha type;Proteasome subunit alpha type-2	PSMA2	30.8798	0.146624	-0.0594954	-0.113628	-0.205609	0.768577	0.939982	0.519936	0.900937	n.s.	n.s.	n.s.	n.s.	n.s.	n.s.	n.s.	n.s.
A0A024RCR6;A0A0G2JK23;P46379-2;P46379;P46379-3;A0A0G2JL47;P46379-5;P46379-4;F6S6P2;X6REW1;A0A0G2JJM1;A0A1B0GX79;F6WML8;F6VEM6;F6X9W3;F6U341;F6U1F2;F6XTU0;A0A0G2JJR8;F6TC96;H0Y710;H0Y4L1	A0A024RCR6;A0A0G2JK23;P46379-2;P46379;P46379-3;A0A0G2JL47;P46379-5;P46379-4;F6S6P2;X6REW1;A0A0G2JJM1	Large proline-rich protein BAG6	BAG6	27.2191	0.261301	0.299955	-0.330245	-0.00451123	0.270809	0.564986	0.990446	0.74873	n.s.	n.s.	n.s.	n.s.	n.s.	n.s.	n.s.	n.s.
A0A075B6K5	A0A075B6K5		IGLV3-9	27.9838	1.66524	1.13467	0.685262	0.569304	0.357047	0.264839	0.42387	0.190324	n.s.	n.s.	n.s.	n.s.	n.s.	n.s.	n.s.	n.s.
A0A075B6P5;P01615	A0A075B6P5;P01615	Ig kappa chain V-II region FR	IGKV2-28	27.1329	1.43955	0.592768	0.192193	-0.0301279	0.884898	0.800118	0.981917	0.52101	n.s.	n.s.	n.s.	n.s.	n.s.	n.s.	n.s.	n.s.
A0A0C4DH68;A0A075B6R9	A0A0C4DH68;A0A075B6R9		IGKV2-24	26.2785	1.93536	1.93851	0.710187	0.644492	0.46066	0.0867647	0.474905	0.24541	n.s.	n.s.	n.s.	n.s.	n.s.	n.s.	n.s.	n.s.
A0A075B6S2;A0A0A0MRZ7	A0A075B6S2		IGKV2D-29	29.5703	1.40247	0.835959	0.695626	0.640597	0.408726	0.541339	0.41972	0.37699	n.s.	n.s.	n.s.	n.s.	n.s.	n.s.	n.s.	n.s.
A0A075B749;A0A087WX83;A0A087WVF8;Q5VU43-3;Q5VU43-13;Q5VU43-2;Q5VU43-12;Q5VU43-8;Q5VU43-9;H0YCY0;A0A087WWY1;A0A087WWI2;A0A087WVQ4;A0A087WWK4;A0A087X041;A0A087X0I1;E9PNE0;H0YCH7;A0A087X229	A0A075B749;A0A087WX83;A0A087WVF8;Q5VU43-3	Myomegalin	PDE4DIP	24.9763	-0.0373247	-1.62148	-1.01444	0.258115	0.338255	0.265789	0.822427	0.993311	n.s.	n.s.	n.s.	n.s.	n.s.	n.s.	n.s.	n.s.
A0A087WSV8;P80303-2;P80303;E9PKG6;E9PLR0;E9PLE9;A0A2R8Y6G7;H0YD18;E9PJP3;E9PM22	A0A087WSV8;P80303-2;P80303;E9PKG6	Nucleobindin-2;Nesfatin-1	NUCB2	27.2013	-1.10709	0.354167	-0.111749	-0.672003	0.860937	0.724079	0.150498	0.218051	n.s.	n.s.	n.s.	n.s.	n.s.	n.s.	n.s.	n.s.
A0A087WSY5;Q96IY4;Q96IY4-2	A0A087WSY5;Q96IY4;Q96IY4-2	Carboxypeptidase B2	CPB2	26.6576	0.690994	2.03511	1.56138	-0.0332377	0.0562626	0.0540578	0.974361	0.779294	n.s.	n.s.	n.s.	n.s.	n.s.	n.s.	n.s.	n.s.
A0A087X2I2;A0A087WT12;P36969-2;P36969;K7EJ20;K7EKX7;K7ENB4;R4GNE4;A0A0A0MTT1;A0A087X247	A0A087X2I2;A0A087WT12;P36969-2;P36969;K7EJ20;K7EKX7;K7ENB4;R4GNE4;A0A0A0MTT1	Glutathione peroxidase;Phospholipid hydroperoxide glutathione peroxidase, mitochondrial	GPX4	29.2027	0.266438	-0.215016	-0.0835419	0.10649	0.792047	0.657321	0.697289	0.677755	n.s.	n.s.	n.s.	n.s.	n.s.	n.s.	n.s.	n.s.
A0A087WT47;P19237;G3V489;G3V4F8;G3V3L5	A0A087WT47;P19237;G3V489;G3V4F8;G3V3L5	Troponin I, slow skeletal muscle	TNNI1	29.7743	3.88323	2.67713	3.00596	3.57524	0.00139062	0.0270877	0.000163988	0.0134761	AS_MvCON_M_up	AS_FvCON_F_up	MR_MvCON_M_up	MR_FvCON_F_up	shared_up	shared_up	both	both
A0A087WTA8;P08123	A0A087WTA8;P08123	Collagen alpha-2(I) chain	COL1A2	32.9931	1.14418	0.910584	1.78178	1.57641	0.00164284	0.310102	0.00547921	0.344855	AS_MvCON_M_up	AS_FvCON_F_up	n.s.	n.s.	shared_up	n.s.	both	n.s.
A0A087WTF0;A2A3K4-2	A0A087WTF0;A2A3K4-2	Protein tyrosine phosphatase domain-containing protein 1	PTPDC1	23.4386	-1.26281	-0.0930094	0.741267	0.0521023	0.438233	0.967881	0.961946	0.520197	n.s.	n.s.	n.s.	n.s.	n.s.	n.s.	n.s.	n.s.
A0A087WTU1;Q15345-3;A0A087X0S7	A0A087WTU1;Q15345-3;A0A087X0S7	Leucine-rich repeat-containing protein 41	LRRC41	25.9757	3.16001	1.21625	0.90275	1.97368	0.48652	0.564986	0.0784723	0.118987	n.s.	n.s.	n.s.	n.s.	n.s.	n.s.	n.s.	n.s.
A0A087WU02;Q96RQ1;H0YI50;F8VPA6;H0YI58;F8W0R1;F8VR88;F8VUZ2;H0YHS0;H0YHJ8	A0A087WU02;Q96RQ1;H0YI50;F8VPA6	Endoplasmic reticulum-Golgi intermediate compartment protein 2	ERGIC2	24.7037	-0.683114	1.17538	0.997325	-1.30571	0.119013	0.198244	0.0326358	0.682125	n.s.	AS_FvCON_F_do	n.s.	n.s.	F_do	n.s.	female	n.s.
A0A087WU07;Q5TGZ0;Q5TGZ0-2;R4GNA1;A0A3B3IRY5;R4GMM1;R4GMY4	A0A087WU07;Q5TGZ0;Q5TGZ0-2	MICOS complex subunit MIC10	MINOS1	27.8352	-0.378507	-1.25849	0.599132	-0.600522	0.48652	0.267234	0.452798	0.897777	n.s.	n.s.	n.s.	n.s.	n.s.	n.s.	n.s.	n.s.
A0A087WU53;Q9H0U3;Q9H0U3-2	A0A087WU53;Q9H0U3	Magnesium transporter protein 1	MAGT1	27.044	-0.38298	0.225718	-0.411564	-0.339713	0.3394	0.815974	0.413279	0.731723	n.s.	n.s.	n.s.	n.s.	n.s.	n.s.	n.s.	n.s.
A0A087WUC6;E9PI68;Q15005;E9PL01;E9PRB9;H0YE04	A0A087WUC6;E9PI68;Q15005;E9PL01;E9PRB9	Signal peptidase complex subunit 2	SPCS2	26.5632	-0.904838	-0.341881	-0.343372	-0.364262	0.621604	0.807051	0.560473	0.49288	n.s.	n.s.	n.s.	n.s.	n.s.	n.s.	n.s.	n.s.
J3QTS8;A0A087WUI4;A0A087X1U0;Q15661-2;Q15661;P20231;A0A0C4DGM1;A0A0C4DFZ7;Q9BZJ3-2;Q9BZJ3;A6NIE9	J3QTS8;A0A087WUI4;A0A087X1U0;Q15661-2;Q15661;P20231;A0A0C4DGM1	Tryptase alpha/beta-1;Tryptase beta-2	TPSAB1	28.5275	0.623131	1.95623	-0.232089	-0.975886	0.862385	0.160392	0.341521	0.857039	n.s.	n.s.	n.s.	n.s.	n.s.	n.s.	n.s.	n.s.
A0A087WUK2;O14979;REV__Q8N0S2-3;REV__Q8N0S2-2;REV__A0A0B4J1R9;REV__Q8N0S2	A0A087WUK2;O14979	Heterogeneous nuclear ribonucleoprotein D-like	HNRNPDL	29.6687	0.232551	0.308713	-0.193309	-0.0470562	0.469758	0.430987	0.869303	0.722292	n.s.	n.s.	n.s.	n.s.	n.s.	n.s.	n.s.	n.s.
A0A087WUQ6;P07203;A0A2R8Y6B6;P07203-2	A0A087WUQ6;P07203;A0A2R8Y6B6	Glutathione peroxidase;Glutathione peroxidase 1	GPX1	30.4306	-0.170765	0.383711	-0.124202	-0.505207	0.713749	0.377268	0.0547919	0.853915	n.s.	n.s.	n.s.	n.s.	n.s.	n.s.	n.s.	n.s.
E7ETK0;A0A2R8Y849;A0A087WUS0;A0A2R8YD14;P62847-2;P62847-3;P62847;P62847-4;A0A2R8Y8A0	E7ETK0;A0A2R8Y849;A0A087WUS0;A0A2R8YD14;P62847-2;P62847-3;P62847;P62847-4	40S ribosomal protein S24	RPS24	28.7771	-0.464451	0.11525	-0.796557	-1.69131	0.0670835	0.919778	7.42597e-05	0.692286	n.s.	AS_FvCON_F_do	n.s.	n.s.	F_do	n.s.	female	n.s.
A0A087WUT6;O60841	A0A087WUT6;O60841	Eukaryotic translation initiation factor 5B	EIF5B	27.8324	-0.415108	-0.1622	-0.768902	-0.815921	0.0849498	0.89338	0.0616715	0.743004	n.s.	n.s.	n.s.	n.s.	n.s.	n.s.	n.s.	n.s.
A0A087WV05;Q99417;A0A0D9SEI7	A0A087WV05;Q99417	C-Myc-binding protein	GJA9-MYCBP	26.7391	-0.220151	1.46509	0.492408	-0.137066	0.700678	0.377268	0.912067	0.968343	n.s.	n.s.	n.s.	n.s.	n.s.	n.s.	n.s.	n.s.
A0A087WVA1;P62341;Q6IAK0;F8WBD0	A0A087WVA1;P62341;Q6IAK0	Selenoprotein T	SELENOT	25.5669	-0.788268	-0.412116	-0.177306	-0.362463	0.793514	0.707324	0.517223	0.510208	n.s.	n.s.	n.s.	n.s.	n.s.	n.s.	n.s.	n.s.
A0A087WVP1;Q14517;D6RCE4	A0A087WVP1;Q14517	Protocadherin Fat 1;Protocadherin Fat 1, nuclear form	FAT1	28.5678	-0.536099	-0.639267	-0.0476956	0.475083	0.956988	0.537157	0.42948	0.74474	n.s.	n.s.	n.s.	n.s.	n.s.	n.s.	n.s.	n.s.
A0A087WWM4;F8WAN9;Q9P2T1;H0YMB3;H0YNJ6;Q9P2T1-3;Q9P2T1-2;H0YLV5;H0YLB8;H0YNH0;H0YK13;H0YMR9;H0YK71;H0YMV5;H0YN22;A0A0B4J281;H0YMG3;H0YKK3;H0YN74;H0YMW6;H0YL68;H0YKE1	A0A087WWM4;F8WAN9;Q9P2T1;H0YMB3;H0YNJ6;Q9P2T1-3;Q9P2T1-2;H0YLV5;H0YLB8	GMP reductase;GMP reductase 2	GMPR2	25.4514	0.133539	0.241663	-0.932962	-0.596554	0.159315	0.887587	0.371905	0.971573	n.s.	n.s.	n.s.	n.s.	n.s.	n.s.	n.s.	n.s.
A0A087WX02;F8WB74;P63302	A0A087WX02;F8WB74;P63302	Selenoprotein W	SELENOW	27.1571	0.655923	-0.640811	0.15614	-0.0389253	0.78373	0.366929	0.943881	0.514922	n.s.	n.s.	n.s.	n.s.	n.s.	n.s.	n.s.	n.s.
H3BS47;A0A087WX34;H3BV03;Q68CZ1-2;Q68CZ1;H3BPF5;I3L2P2;I3L1B5;H3BPS4	H3BS47;A0A087WX34;H3BV03;Q68CZ1-2;Q68CZ1;H3BPF5	Protein fantom	RPGRIP1L	27.6295	5.32267	-0.227892	-1.55559	0.579956	0.360449	0.956478	0.747102	0.0393916	n.s.	n.s.	n.s.	MR_FvCON_F_up	n.s.	F_up	n.s.	female
A0A087WXC5;E7ESZ7;O95299;O95299-2;C9J6X0;Q8N1B9;H7C2W5;H7C1Y7;H7C2X4	A0A087WXC5;E7ESZ7;O95299;O95299-2	NADH dehydrogenase [ubiquinone] 1 alpha subcomplex subunit 10, mitochondrial	NDUFA10	34.4686	-0.326631	-0.319733	-0.630707	-0.51118	0.0018174	0.327575	0.0116896	0.495163	AS_MvCON_M_do	AS_FvCON_F_do	n.s.	n.s.	shared_do	n.s.	both	n.s.
A0A087WY55;Q9NP79;Q5TGM0;Q9NP79-2	A0A087WY55;Q9NP79;Q5TGM0;Q9NP79-2	Vacuolar protein sorting-associated protein VTA1 homolog	VTA1	28.1793	-0.487518	0.107584	-0.170755	-0.0889506	0.544914	0.864147	0.7499	0.329181	n.s.	n.s.	n.s.	n.s.	n.s.	n.s.	n.s.	n.s.
A0A087WY71;E9PFW3;Q96CW1-2;Q96CW1;C9JJ47;C9JJD3;C9JPV8;H7C4C3	A0A087WY71;E9PFW3;Q96CW1-2;Q96CW1;C9JJ47	AP-2 complex subunit mu	AP2M1	29.5572	0.251097	0.462534	-0.0622481	-0.16177	0.862385	0.238844	0.57589	0.73985	n.s.	n.s.	n.s.	n.s.	n.s.	n.s.	n.s.	n.s.
A0A087WY85;P61077;P61077-3;D6RAH7;P61077-2;D6RAW0;D6RA11;D6RFM0;P62837-2;D6R9F6;D6R933;D6RGD0;D6R980;D6RIZ3	A0A087WY85;P61077;P61077-3;D6RAH7;P61077-2;D6RAW0;D6RA11;D6RFM0;P62837-2	Ubiquitin-conjugating enzyme E2 D3;Ubiquitin-conjugating enzyme E2 D2	UBE2D3	28.6001	-1.03086	0.421834	-0.276771	0.142787	0.684076	0.718665	0.824791	0.368632	n.s.	n.s.	n.s.	n.s.	n.s.	n.s.	n.s.	n.s.
A0A087WYF7;Q6UXV4;A0A087WUX8	A0A087WYF7;Q6UXV4;A0A087WUX8	MICOS complex subunit MIC27	APOOL	32.1161	-0.0745295	0.016369	-0.201881	-0.36245	0.360449	0.978969	0.0681499	0.936239	n.s.	n.s.	n.s.	n.s.	n.s.	n.s.	n.s.	n.s.
A0A087WYR0;P09132;A0A2U3TZN1;A0A087WWU9;D6RBG4;A0A2R8Y4M3;P09132-2	A0A087WYR0;P09132;A0A2U3TZN1;A0A087WWU9	Signal recognition particle 19 kDa protein	SRP19	24.3393	-0.133725	0.19225	0.344394	0.225551	0.646947	0.907257	0.752562	0.968175	n.s.	n.s.	n.s.	n.s.	n.s.	n.s.	n.s.	n.s.
A0A087WZE9;Q15651;Q15651-2	A0A087WZE9		HMGN3	27.3734	0.589447	0.028666	0.510725	0.388533	0.399071	0.98519	0.504336	0.684925	n.s.	n.s.	n.s.	n.s.	n.s.	n.s.	n.s.	n.s.
A0A087WZN1;O43837;A0A087X2E5;O43837-3;A0A0D9SG66	A0A087WZN1;O43837;A0A087X2E5	Isocitrate dehydrogenase [NAD] subunit, mitochondrial;Isocitrate dehydrogenase [NAD] subunit beta, mitochondrial	IDH3B	33.3627	-0.0100305	0.0849119	-0.175327	-0.246998	0.460591	0.872449	0.243835	0.992517	n.s.	n.s.	n.s.	n.s.	n.s.	n.s.	n.s.	n.s.
A0A087WZT2;Q6UX53	A0A087WZT2;Q6UX53	Methyltransferase-like protein 7B	METTL7B	25.0935	0.0584209	0.0401124	-0.738631	-0.737597	0.421145	0.986518	0.387812	0.989301	n.s.	n.s.	n.s.	n.s.	n.s.	n.s.	n.s.	n.s.
F5H3Q5;A0A087WZY5;F5H851;A8MXH5;Q14031-2;Q14031	F5H3Q5;A0A087WZY5;F5H851;A8MXH5;Q14031-2;Q14031	Collagen alpha-6(IV) chain	COL4A6	27.4699	2.11102	0.902519	2.3011	2.65567	0.032225	0.682412	0.011804	0.349083	AS_MvCON_M_up	AS_FvCON_F_up	n.s.	n.s.	shared_up	n.s.	both	n.s.
A0A087X020;Q9Y3A5;F8WE72	A0A087X020;Q9Y3A5	Ribosome maturation protein SBDS	SBDS	30.1883	-0.110178	0.121346	0.19195	0.221943	0.278173	0.733212	0.181108	0.841488	n.s.	n.s.	n.s.	n.s.	n.s.	n.s.	n.s.	n.s.
A0A087X0D5;P09668;E9PKT6;A0A3B3IRM7	A0A087X0D5;P09668	Pro-cathepsin H;Cathepsin H mini chain;Cathepsin H;Cathepsin H heavy chain;Cathepsin H light chain	CTSH	25.6048	-0.750438	-0.739563	-0.558996	-1.10671	0.479062	0.564986	0.106663	0.685375	n.s.	n.s.	n.s.	n.s.	n.s.	n.s.	n.s.	n.s.
A0A087X0K0;P39059	A0A087X0K0;P39059	Collagen alpha-1(XV) chain;Restin;Restin-2;Restin-3;Restin-4	COL15A1	32.3038	0.274319	0.0694767	-0.284186	-0.182126	0.207305	0.905081	0.421819	0.613849	n.s.	n.s.	n.s.	n.s.	n.s.	n.s.	n.s.	n.s.
A0A087X0R6;Q9UMY4-2;Q9UMY4;Q9UMY4-3	A0A087X0R6;Q9UMY4-2;Q9UMY4;Q9UMY4-3	Sorting nexin-12	SNX12	26.048	-1.63099	-0.544157	0.135646	-0.0872369	0.857036	0.6071	0.897542	0.085994	n.s.	n.s.	n.s.	n.s.	n.s.	n.s.	n.s.	n.s.
A0A087X0T3;A7E2Y1;Q5JW47;Q5JW45;A7E2Y1-2	A0A087X0T3;A7E2Y1	Myosin-7B	MYH7B	26.7334	-1.71237	-1.09834	0.892125	-1.12227	0.196472	0.269727	0.0866821	0.158684	n.s.	n.s.	n.s.	n.s.	n.s.	n.s.	n.s.	n.s.
A0A087X0W7;A0A087WT95;P49753;P49753-2	A0A087X0W7;A0A087WT95;P49753;P49753-2	Acyl-coenzyme A thioesterase 2, mitochondrial	ACOT2	31.4013	-0.384743	-0.857792	-1.91223	-2.00374	0.0879774	0.718665	0.0677093	0.941688	n.s.	n.s.	n.s.	n.s.	n.s.	n.s.	n.s.	n.s.
A0A087X0X3;M0R2I7;M0QYQ7;M0R0Y6;M0QY96	A0A087X0X3		HNRNPM	31.9229	-0.139518	0.193569	-0.224994	-0.533864	0.193844	0.515012	0.00107743	0.779504	n.s.	AS_FvCON_F_do	n.s.	n.s.	F_do	n.s.	female	n.s.
A0A0G2JN29;A0A087X117;Q15155;A0A0G2JP90;A0A087WW46;H3BUC9;I3L0Q6;H3BTW1;H3BPS9	A0A0G2JN29;A0A087X117;Q15155;A0A0G2JP90;A0A087WW46	Nodal modulator 1	NOMO1	28.1352	-0.255611	0.0198092	-0.140271	-0.689507	0.800196	0.986518	0.102868	0.866749	n.s.	n.s.	n.s.	n.s.	n.s.	n.s.	n.s.	n.s.
A0A087X1G7;O60613;A0A0J9YX89;A0A3B3IT39;A0A087WXL0;A0A0B4J1T0;A8MZD0;O60613-2	A0A087X1G7;O60613;A0A0J9YX89	15 kDa selenoprotein	SELENOF	25.5455	0.288398	0.23964	-0.159221	-0.416307	0.882958	0.908376	0.634541	0.939405	n.s.	n.s.	n.s.	n.s.	n.s.	n.s.	n.s.	n.s.
A0A087X1J7;P22352;H0YBE4;E5RG32;H0YC19	A0A087X1J7;P22352	Glutathione peroxidase;Glutathione peroxidase 3	GPX3	31.8772	0.800468	0.802102	-0.254032	-0.0578726	0.49849	0.0586598	0.885636	0.193501	n.s.	n.s.	n.s.	n.s.	n.s.	n.s.	n.s.	n.s.
A0A087X1K9;E5RJ48;E5RI35	A0A087X1K9;E5RJ48		LYPLA1	25.6651	0.0544502	0.266982	0.812554	0.385296	0.461591	0.916836	0.730637	0.991718	n.s.	n.s.	n.s.	n.s.	n.s.	n.s.	n.s.	n.s.
A0A087X1Z3;Q9UL46;H0YM70;H0YKU2	A0A087X1Z3;Q9UL46;H0YM70	Proteasome activator complex subunit 2	PSME2	30.9545	0.090947	0.205136	-0.444133	-0.241323	0.0355444	0.615913	0.267031	0.918531	AS_MvCON_M_do	n.s.	n.s.	n.s.	M_do	n.s.	male	n.s.
A0A087X232;P09871;F8WCZ6;H0Y5D1;F5H7T4;B5MCV4	A0A087X232;P09871;F8WCZ6	Complement C1s subcomponent;Complement C1s subcomponent heavy chain;Complement C1s subcomponent light chain	C1S	26.8105	2.81185	2.73765	2.08657	2.0017	0.00868308	0.00625231	0.0113377	0.0377414	AS_MvCON_M_up	AS_FvCON_F_up	MR_MvCON_M_up	MR_FvCON_F_up	shared_up	shared_up	both	both
A0A087X256;Q2M389;Q2M389-2;F8W1W1;F8VYH7;F8VNZ5	A0A087X256;Q2M389;Q2M389-2	WASH complex subunit 7	WASHC4	27.0424	-0.495487	-0.360475	-1.06202	-1.27522	0.0493642	0.77209	0.0159387	0.751528	AS_MvCON_M_do	AS_FvCON_F_do	n.s.	n.s.	shared_do	n.s.	both	n.s.
A0A087X279;P09913	A0A087X279;P09913	Interferon-induced protein with tetratricopeptide repeats 2	IFIT2	30.7365	2.8568	-0.0553794	0.675319	3.35613	0.656527	0.986609	0.0055996	0.240404	n.s.	AS_FvCON_F_up	n.s.	n.s.	F_up	n.s.	female	n.s.
A0A087X2D5;Q9BRJ2;A0A0G2JMS5;A0A087WU62	A0A087X2D5;Q9BRJ2;A0A0G2JMS5;A0A087WU62	39S ribosomal protein L45, mitochondrial	MRPL45	27.2429	-0.00182819	-0.265948	-0.845555	-0.515438	0.0355444	0.776532	0.205935	0.99782	AS_MvCON_M_do	n.s.	n.s.	n.s.	M_do	n.s.	male	n.s.
A0A087X2H1;Q9ULT8;H0YJP0;G3V4V5;H0YJD4;A0A087WVU6;H0YJV8	A0A087X2H1;Q9ULT8;H0YJP0;G3V4V5	E3 ubiquitin-protein ligase HECTD1	HECTD1	26.1402	-0.142769	-0.233083	-0.369602	0.361611	0.70537	0.908853	0.675834	0.976659	n.s.	n.s.	n.s.	n.s.	n.s.	n.s.	n.s.	n.s.
A0A087X2I1;P62333;H0YJC0;H0YJS8;H0YJX2;H0YJE9;H0YJT1	A0A087X2I1;P62333	26S protease regulatory subunit 10B	PSMC6	30.7253	-0.16525	0.0709968	-0.198551	-0.323398	0.426854	0.906427	0.14649	0.820588	n.s.	n.s.	n.s.	n.s.	n.s.	n.s.	n.s.	n.s.
A0A096LPE2;P35542;A0A3B3ISW8;E9PR14;G3V1D9;P0DJI9-2	A0A096LPE2;P35542	Serum amyloid A-4 protein	SAA2-SAA4	26.522	-0.884975	1.27943	1.21385	0.286578	0.123526	0.267284	0.749143	0.661482	n.s.	n.s.	n.s.	n.s.	n.s.	n.s.	n.s.	n.s.
A0A096LPJ4;A0A096LNZ9	A0A096LPJ4;A0A096LNZ9		ISG15	26.6448	0.984356	0.790368	1.03853	0.0714662	0.221021	0.611558	0.943881	0.634969	n.s.	n.s.	n.s.	n.s.	n.s.	n.s.	n.s.	n.s.
A0A0A0MQS6;Q9H251-4;Q9H251-2;Q9H251;Q9H251-8;A0A087X097;Q9H251-3;Q9H251-9;Q9H251-7	A0A0A0MQS6;Q9H251-4;Q9H251-2;Q9H251;Q9H251-8;A0A087X097;Q9H251-3	Cadherin-23	CDH23	25.1818	0.571516	-0.111882	0.482008	0.732941	0.751148	0.971644	0.570229	0.905336	n.s.	n.s.	n.s.	n.s.	n.s.	n.s.	n.s.	n.s.
A0A0A0MTC7;A0A0A0MQS9;Q16363-2;Q16363;E5RFQ2;H0Y351;H0YAQ5;H0YAP9;E5RK79;E5RFD7;E5RHF3;Q6LET9;Q16363-3	A0A0A0MTC7;A0A0A0MQS9;Q16363-2;Q16363	Laminin subunit alpha-4	LAMA4	32.2851	0.378364	0.0937057	-0.10639	-0.0955644	0.574427	0.811662	0.584291	0.221741	n.s.	n.s.	n.s.	n.s.	n.s.	n.s.	n.s.	n.s.
A0A0A0MQU4;Q96I15;Q96I15-2;H7C3V9;H7C277;H7C1N7;H7C1S7;C9JNL5;H7C4A1;H7C280;F8WCL3;F8WBU3;H7C2M1	A0A0A0MQU4;Q96I15;Q96I15-2;H7C3V9;H7C277	Selenocysteine lyase	SCLY	25.5333	-1.46111	0.777836	-0.12102	-1.49281	0.92035	0.643223	0.0761128	0.441904	n.s.	n.s.	n.s.	n.s.	n.s.	n.s.	n.s.	n.s.
C9JP00;A0A0A0MQX8;Q9NR56;Q9NR56-7;Q86VM6;C9JCX1;H7C4Y1;Q9NUK0-2	C9JP00;A0A0A0MQX8;Q9NR56;Q9NR56-7;Q86VM6	Muscleblind-like protein 1	MBNL1	24.5179	0.671122	0.414397	0.461194	-0.596359	0.554598	0.793948	0.393563	0.716518	n.s.	n.s.	n.s.	n.s.	n.s.	n.s.	n.s.	n.s.
A0A0A0MQZ4;Q8N3J5;V9GY69;V9GYZ5;Q8N3J5-2;V9GYS8;Q8N3J5-3;V9GYI6	A0A0A0MQZ4;Q8N3J5;V9GY69	Protein phosphatase 1K, mitochondrial	PPM1K	28.2107	-0.112358	0.0518758	-1.03767	0.0461949	0.0179089	0.967881	0.934334	0.96479	AS_MvCON_M_do	n.s.	n.s.	n.s.	M_do	n.s.	male	n.s.
A0A0A0MR85;Q03013-2;Q03013;A6NNT0;A0A1W2PNX1	A0A0A0MR85;Q03013-2;Q03013	Glutathione S-transferase Mu 4	GSTM4	26.8735	0.984271	0.0185777	0.128955	-0.247839	0.939387	0.997343	0.862755	0.783228	n.s.	n.s.	n.s.	n.s.	n.s.	n.s.	n.s.	n.s.
A0A0A0MRA3;Q8WZ42-9;Q8WZ42-3;Q8WZ42-10;A0A0U1RRH3;C9JQJ2;REV__P61225	A0A0A0MRA3;Q8WZ42-9;Q8WZ42-3;Q8WZ42-10	Titin	TTN	29.0434	-0.975688	-0.0204365	0.518051	0.895308	0.310792	0.987382	0.0542282	0.316544	n.s.	n.s.	n.s.	n.s.	n.s.	n.s.	n.s.	n.s.
A0A0A0MRA5;B7Z4B8;Q9BUJ2-4;Q9BUJ2-2;Q9BUJ2;Q9BUJ2-3;M0R3F1;M0QYZ0;M0R203;M0QZV6;M0R0K8;M0QYI8;M0QYM5;Q9BUJ2-5	A0A0A0MRA5;B7Z4B8;Q9BUJ2-4;Q9BUJ2-2;Q9BUJ2;Q9BUJ2-3;M0R3F1;M0QYZ0	Heterogeneous nuclear ribonucleoprotein U-like protein 1	HNRNPUL1	26.6111	0.570903	0.31887	-0.391268	-0.302542	0.405293	0.724297	0.503685	0.569966	n.s.	n.s.	n.s.	n.s.	n.s.	n.s.	n.s.	n.s.
A0A0A0MRJ6;H7BY58;P22061;P22061-2;F6S8N6;A0A3F2YNX8;C9J0F2;F8WDT3;F8WAV5;F8WAX2;H7C4X2	A0A0A0MRJ6;H7BY58;P22061;P22061-2;F6S8N6;A0A3F2YNX8	Protein-L-isoaspartate O-methyltransferase;Protein-L-isoaspartate(D-aspartate) O-methyltransferase	PCMT1	32.8227	-0.288033	-0.145698	0.138918	0.320258	0.537683	0.724079	0.0915167	0.516758	n.s.	n.s.	n.s.	n.s.	n.s.	n.s.	n.s.	n.s.
A0A0A0MRM2	A0A0A0MRM2		NRAP	24.8176	-1.82647	0.162044	-0.00542539	-2.00998	0.99484	0.916751	0.000316989	0.0587478	n.s.	AS_FvCON_F_do	n.s.	n.s.	F_do	n.s.	female	n.s.
A0A0A0MRN9;Q5T457	A0A0A0MRN9;Q5T457		ANKRD2	25.6106	-0.328825	-0.474218	-0.956677	-0.76048	0.386989	0.857793	0.471779	0.947932	n.s.	n.s.	n.s.	n.s.	n.s.	n.s.	n.s.	n.s.
A0A0A0MRR5;Q96BW1;Q96BW1-3;E9PSD7;F8W6E9;Q96BW1-2	A0A0A0MRR5;Q96BW1;Q96BW1-3;E9PSD7	Uracil phosphoribosyltransferase homolog	UPRT	25.9079	-1.45073	1.21238	1.7194	-0.915381	0.195417	0.623075	0.503255	0.662895	n.s.	n.s.	n.s.	n.s.	n.s.	n.s.	n.s.	n.s.
A0A0A0MRR7;P09234	A0A0A0MRR7;P09234	U1 small nuclear ribonucleoprotein C	SNRPC	26.2757	-1.10387	-0.172288	-0.425389	-1.08247	0.62027	0.930195	0.124404	0.500516	n.s.	n.s.	n.s.	n.s.	n.s.	n.s.	n.s.	n.s.
A0A0A0MRT6;Q8IZP0-2;Q8IZP0-4;Q8IZP0-3;Q8IZP0-5;Q8IZP0-6;Q8IZP0-9;Q8IZP0;B6VEX4;Q8IZP0-10;Q8IZP0-8;Q8IZP0-7;Q8IZP0-12;Q8IZP0-11	A0A0A0MRT6;Q8IZP0-2;Q8IZP0-4;Q8IZP0-3;Q8IZP0-5;Q8IZP0-6;Q8IZP0-9;Q8IZP0;B6VEX4;Q8IZP0-10;Q8IZP0-8;Q8IZP0-7;Q8IZP0-12;Q8IZP0-11	Abl interactor 1	ABI1	26.5922	-0.219764	-1.20018	-0.677343	-1.52825	0.623297	0.572445	0.179466	0.974184	n.s.	n.s.	n.s.	n.s.	n.s.	n.s.	n.s.	n.s.
A0A0A0MRZ8;P04433	A0A0A0MRZ8;P04433	Ig kappa chain V-III region VG	IGKV3D-11	28.0426	0.958807	0.64326	0.735324	1.00022	0.478557	0.747612	0.283087	0.698522	n.s.	n.s.	n.s.	n.s.	n.s.	n.s.	n.s.	n.s.
A0A0A0MS41;Q9BWM7;A0A1P0AYU5;S4R3N9	A0A0A0MS41;Q9BWM7;A0A1P0AYU5;S4R3N9	Sideroflexin;Sideroflexin-3	SFXN3	28.7219	-0.746882	0.300153	0.148045	0.104847	0.776549	0.7259	0.824855	0.37699	n.s.	n.s.	n.s.	n.s.	n.s.	n.s.	n.s.	n.s.
A0A0A0MS51;A0A0A0MT01;P06396-4;Q5T0H8;REV__H0YJM7	A0A0A0MS51;A0A0A0MT01;P06396-4	Gelsolin	GSN	28.3396	-0.361228	-0.674986	-0.826516	-1.70051	0.226317	0.582797	0.00746721	0.883029	n.s.	AS_FvCON_F_do	n.s.	n.s.	F_do	n.s.	female	n.s.
A0A0A0MSA4	A0A0A0MSA4		EPB41L3	24.6321	0.230863	0.327444	-0.194205	-1.00815	0.817339	0.834536	0.109384	0.939405	n.s.	n.s.	n.s.	n.s.	n.s.	n.s.	n.s.	n.s.
A0A0A0MSB8;Q9UPT5-6;Q9UPT5;Q9UPT5-5;Q9UPT5-1;Q9UPT5-2;A0A0A0MRE1;Q9UPT5-4;B5MCY9;K7ERQ5;C9JME6;C9JKC2	A0A0A0MSB8;Q9UPT5-6;Q9UPT5;Q9UPT5-5;Q9UPT5-1;Q9UPT5-2;A0A0A0MRE1	Exocyst complex component 7	EXOC7	26.4867	0.260107	0.45388	-0.834119	-0.243163	0.177496	0.723634	0.722385	0.918372	n.s.	n.s.	n.s.	n.s.	n.s.	n.s.	n.s.	n.s.
J3KNW4;A0A0A0MSG2;Q14192;F8WDA8;U3KQT4;Q14192-2;C9J3S8	J3KNW4;A0A0A0MSG2;Q14192	Four and a half LIM domains protein 2	FHL2	33.2261	-0.723978	-0.343277	-0.362884	0.151314	0.451658	0.696934	0.758183	0.442691	n.s.	n.s.	n.s.	n.s.	n.s.	n.s.	n.s.	n.s.
A0A0A0MSS8;P42330;S4R3Z2;S4R3D5;P17516	A0A0A0MSS8;P42330;S4R3Z2;S4R3D5	Aldo-keto reductase family 1 member C3	AKR1C3	29.1613	0.536412	0.467314	0.705486	0.228256	0.128479	0.588692	0.652444	0.646926	n.s.	n.s.	n.s.	n.s.	n.s.	n.s.	n.s.	n.s.
A0A0G2JKZ1;A0A0A0MSV9;O15533-2;O15533;O15533-3;A2AB90;A0A0G2JH37;Q6P1N7;C9JA35;A0A0A0MT98;O15533-4;A0A140T9B2;A0A0G2JJI5	A0A0G2JKZ1;A0A0A0MSV9;O15533-2;O15533;O15533-3;A2AB90;A0A0G2JH37;Q6P1N7	Tapasin	TAPBP	25.2848	-0.274655	-0.140082	-0.157295	-0.743647	0.868505	0.939982	0.311269	0.931288	n.s.	n.s.	n.s.	n.s.	n.s.	n.s.	n.s.	n.s.
A0A0A0MT83;P26440;P26440-2;H7C4G6;H0YLC3;H0YKV0;H0YN10;A0A087WVD3	A0A0A0MT83;P26440;P26440-2;H7C4G6	Isovaleryl-CoA dehydrogenase, mitochondrial	IVD	31.9987	0.0627125	-0.232123	-0.298939	0.18966	0.159318	0.528577	0.375406	0.950643	n.s.	n.s.	n.s.	n.s.	n.s.	n.s.	n.s.	n.s.
A0A0A0MTH3;Q13418;Q13418-2;Q13418-3;E9PQ52;A0A087WW45	A0A0A0MTH3;Q13418;Q13418-2;Q13418-3	Integrin-linked protein kinase	ILK	31.8834	0.197679	-0.056402	-0.148036	-0.173391	0.541056	0.917463	0.42387	0.737146	n.s.	n.s.	n.s.	n.s.	n.s.	n.s.	n.s.	n.s.
A0A0A0MTN0;Q13617;Q13617-2;Q5T2B5;Q5T2B7	A0A0A0MTN0;Q13617;Q13617-2;Q5T2B5	Cullin-2	CUL2	27.9726	0.379136	0.125735	-0.360821	-0.711478	0.496994	0.918251	0.121935	0.78841	n.s.	n.s.	n.s.	n.s.	n.s.	n.s.	n.s.	n.s.
A0A0A0MTS7;Q8WZ42-12;H7C195	A0A0A0MTS7;Q8WZ42-12	Titin	TTN	40.7018	-0.0945567	-0.226183	-0.0797141	-0.0589995	0.715017	0.430745	0.767575	0.883029	n.s.	n.s.	n.s.	n.s.	n.s.	n.s.	n.s.	n.s.
A0A0A6YYH1;Q7Z6K5-2;Q7Z6K5;H0YMP5;H0YL03;H0YMK0;H0YL85	A0A0A6YYH1;Q7Z6K5-2;Q7Z6K5	Arpin	C15orf38-AP3S2	24.1931	0.668312	0.423429	0.439127	0.213639	0.455241	0.689356	0.717602	0.601894	n.s.	n.s.	n.s.	n.s.	n.s.	n.s.	n.s.	n.s.
A0A0A6YYJ8;Q96HJ9-2;Q9Y383-3;A8MYV2;Q9NQ29-3;B8ZZ10;B8ZZ12;B8ZZ09	A0A0A6YYJ8;Q96HJ9-2;Q9Y383-3	UPF0562 protein C7orf55;Putative RNA-binding protein Luc7-like 2	LUC7L2	28.3148	-0.192595	-0.146977	-0.0410603	-0.00691163	0.935758	0.8703	0.989445	0.883691	n.s.	n.s.	n.s.	n.s.	n.s.	n.s.	n.s.	n.s.
A0A0A6YYL2;P0DMN0;P0DMM9;P0DMM9-3;P0DMM9-2;H3BPL6;H3BNY7;H3BRT0	A0A0A6YYL2;P0DMN0;P0DMM9;P0DMM9-3;P0DMM9-2	Sulfotransferase;Sulfotransferase 1A4;Sulfotransferase 1A3	SULT1A4	27.9251	-0.401875	-0.384108	-0.811598	-1.28321	0.194066	0.783201	0.0289025	0.841488	n.s.	AS_FvCON_F_do	n.s.	n.s.	F_do	n.s.	female	n.s.
A0A0A6YYL4;P57737-3;P57737-4;P57737;P57737-2;I3L167;I3L3T0;Q9Y3D7;I3L1U7;E7EP81;I3L442;I3L359;I3L426;I3L2Y6;I3L1M1;I3NI06;I3L212;I3L1G9;A0A0B4J298;I3L351;I3L0X8	A0A0A6YYL4;P57737-3;P57737-4;P57737;P57737-2	Coronin;Coronin-7	CORO7-PAM16	27.6891	-0.822327	-0.118522	-0.603605	-0.560473	0.315558	0.938343	0.331457	0.52101	n.s.	n.s.	n.s.	n.s.	n.s.	n.s.	n.s.	n.s.
A0A0B4J1R2;Q9H6R3;Q9H6R3-2;F8VZB4;H0YII9	A0A0B4J1R2;Q9H6R3;Q9H6R3-2	Acyl-CoA synthetase short-chain family member 3, mitochondrial	ACSS3	29.149	-0.878969	-0.594379	-1.54904	-1.52683	2.48498e-05	0.281724	2.62592e-05	0.207835	AS_MvCON_M_do	AS_FvCON_F_do	n.s.	n.s.	shared_do	n.s.	both	n.s.
A0A0B4J1X5;A0A0C4DH42;A0A075B7E8;P01767;A0A0J9YVY3	A0A0B4J1X5;A0A0C4DH42;A0A075B7E8;P01767	Ig heavy chain V-III region BUT	IGHV3-74	27.0066	1.14603	0.471133	-0.396593	-0.333499	0.765077	0.861963	0.780494	0.671878	n.s.	n.s.	n.s.	n.s.	n.s.	n.s.	n.s.	n.s.
A0A0B4J1Z1;C9JAB2;Q16629-3;Q16629-2;Q16629-4;Q16629;F8WEA1	A0A0B4J1Z1;C9JAB2;Q16629-3;Q16629-2;Q16629-4;Q16629	Serine/arginine-rich splicing factor 7	SRSF7	27.3634	0.326345	0.73889	0.1983	-0.466748	0.763979	0.37331	0.380278	0.853915	n.s.	n.s.	n.s.	n.s.	n.s.	n.s.	n.s.	n.s.
A0A0B4J231;B9A064;P0CG04	A0A0B4J231;B9A064;P0CG04	Immunoglobulin lambda-like polypeptide 5;Ig lambda-1 chain C regions	IGLL5	31.9574	0.874101	2.07529	1.74289	0.755145	0.00510253	0.00874006	0.240724	0.562404	AS_MvCON_M_up	n.s.	MR_MvCON_M_up	n.s.	M_up	M_up	male	male
Q5W0H4;A0A0B4J2C3;P13693;J3KPG2;E9PJF7;P13693-2;H0YCX0;Q56UQ5;Q9HAU6	Q5W0H4;A0A0B4J2C3;P13693;J3KPG2;E9PJF7;P13693-2	Translationally-controlled tumor protein	TPT1	30.5053	-0.224753	-0.293641	-0.312927	-0.580681	0.397647	0.657321	0.0757107	0.840788	n.s.	n.s.	n.s.	n.s.	n.s.	n.s.	n.s.	n.s.
A0A0C4DFM0;G3V5T0;G3V4T6;A0A0A0MR33;G3V267;O43708-2;G3V3B9;G3V5U6;G3V5G8;H0YJN8	A0A0C4DFM0;G3V5T0;G3V4T6;A0A0A0MR33;G3V267;O43708-2	Maleylacetoacetate isomerase	GSTZ1	29.037	0.902458	0.00994343	-0.454474	0.486221	0.399843	0.995874	0.333247	0.375493	n.s.	n.s.	n.s.	n.s.	n.s.	n.s.	n.s.	n.s.
A0A0C4DFN3;Q99685;Q99685-2;A0A3B3ITT3;E7EWX8;H7C599;H7C5K5;C9J8Q3;C9JAM4	A0A0C4DFN3;Q99685;Q99685-2;A0A3B3ITT3;E7EWX8;H7C599	Monoglyceride lipase	MGLL	29.0783	-0.246781	-0.300068	-1.21582	-1.54267	0.0217243	0.821213	0.00332347	0.910786	AS_MvCON_M_do	AS_FvCON_F_do	n.s.	n.s.	shared_do	n.s.	both	n.s.
A0A0C4DFT3;Q12959-4;Q12959-2;Q12959-5;Q12959-3;Q12959-6;Q12959;Q12959-7;Q12959-8;Q12959-9;E7EQD7;B4E2H8;H7C166;C9IYP1;C9JCP6;A8MUT6;C9JUA9;C9J110;F2Z2L0;A8MUT9	A0A0C4DFT3;Q12959-4;Q12959-2;Q12959-5;Q12959-3;Q12959-6;Q12959;Q12959-7;Q12959-8;Q12959-9;E7EQD7	Disks large homolog 1	DLG1	25.4013	-0.479717	0.29302	0.633774	0.0247371	0.314966	0.84348	0.972939	0.787225	n.s.	n.s.	n.s.	n.s.	n.s.	n.s.	n.s.	n.s.
A0A0C4DFZ2;P15289-2;P15289	A0A0C4DFZ2;P15289-2;P15289	Arylsulfatase A;Arylsulfatase A component B;Arylsulfatase A component C	ARSA	25.0541	0.462383	0.00144401	0.367616	1.17337	0.680206	0.999173	0.0981611	0.852575	n.s.	n.s.	n.s.	n.s.	n.s.	n.s.	n.s.	n.s.
A0A0C4DGA7;A0A0A0MRD5;O94929-4;D6RHE7	A0A0C4DGA7		ABLIM3	28.8945	0.0981807	0.412654	0.340887	0.589733	0.476569	0.608916	0.159776	0.967066	n.s.	n.s.	n.s.	n.s.	n.s.	n.s.	n.s.	n.s.
A0A0C4DGB0;Q9UIL1-2;Q9UIL1;Q9UIL1-3	A0A0C4DGB0;Q9UIL1-2;Q9UIL1;Q9UIL1-3	Short coiled-coil protein	SCOC	24.6802	-1.77672	-0.439103	-0.142944	-0.522648	0.887368	0.807207	0.509047	0.204275	n.s.	n.s.	n.s.	n.s.	n.s.	n.s.	n.s.	n.s.
A0A0C4DGB9	A0A0C4DGB9		PPA2	24.4077	-0.274489	-0.183624	0.204907	0.197393	0.752877	0.894085	0.735334	0.884521	n.s.	n.s.	n.s.	n.s.	n.s.	n.s.	n.s.	n.s.
A0A0C4DGJ8;Q6IPR1;G3V521	A0A0C4DGJ8;Q6IPR1	LYR motif-containing protein 5	ETFRF1	26.5322	0.0671379	-0.744845	-1.38883	-0.952834	0.0192458	0.477836	0.112416	0.98552	AS_MvCON_M_do	n.s.	n.s.	n.s.	M_do	n.s.	male	n.s.
A0A0C4DGQ5;P04632;K7ELJ7;K7EM73;A0A075B7C0;K7EKD8;U3KQE2;K7EIV0;U3KPR7;K7ES78;K7EMQ1	A0A0C4DGQ5;P04632;K7ELJ7;K7EM73;A0A075B7C0;K7EKD8;U3KQE2;K7EIV0	Calpain small subunit 1	CAPNS1	31.5912	-0.224925	0.273592	-0.0396294	-0.0496252	0.862385	0.281724	0.802939	0.580991	n.s.	n.s.	n.s.	n.s.	n.s.	n.s.	n.s.	n.s.
A0A0C4DGQ8;Q6IAN0;J3KRS1;J3QKT1;J3QLJ8;J3QLK1	A0A0C4DGQ8;Q6IAN0	Dehydrogenase/reductase SDR family member 7B	DHRS7B	28.1244	-0.107443	-0.327259	-0.621228	-0.55831	0.00685806	0.389984	0.0139623	0.909302	AS_MvCON_M_do	AS_FvCON_F_do	n.s.	n.s.	shared_do	n.s.	both	n.s.
A0A0C4DGS0;A0A2Y9D025;P56556;R4GN43	A0A0C4DGS0;A0A2Y9D025;P56556;R4GN43	NADH dehydrogenase [ubiquinone] 1 alpha subcomplex subunit 6	NDUFA6	32.7607	-0.143603	-0.210209	-0.168749	-0.0788274	0.572387	0.685215	0.791438	0.879291	n.s.	n.s.	n.s.	n.s.	n.s.	n.s.	n.s.	n.s.
A0A0C4DGS1;P39656;P39656-3;P39656-2;U3KQ84	A0A0C4DGS1;P39656;P39656-3;P39656-2	Dolichyl-diphosphooligosaccharide--protein glycosyltransferase 48 kDa subunit	DDOST	30.531	-0.271882	-0.147774	-0.193517	-0.435276	0.31908	0.685977	0.0127345	0.510208	n.s.	AS_FvCON_F_do	n.s.	n.s.	F_do	n.s.	female	n.s.
A0A0C4DH31	A0A0C4DH31		IGHV1-18	24.398	1.60116	1.87874	0.879886	0.596219	0.288918	0.0619124	0.468534	0.316544	n.s.	n.s.	n.s.	n.s.	n.s.	n.s.	n.s.	n.s.
A0A0C4DH38	A0A0C4DH38		IGHV5-51	25.6698	1.13742	1.15551	1.20969	0.124225	0.193801	0.441733	0.909218	0.61289	n.s.	n.s.	n.s.	n.s.	n.s.	n.s.	n.s.	n.s.
A0A0C4DH72	A0A0C4DH72		IGKV1-6	24.3332	1.70738	1.23774	0.35768	0.293544	0.686136	0.238844	0.717602	0.206659	n.s.	n.s.	n.s.	n.s.	n.s.	n.s.	n.s.	n.s.
A0A0D9SEI0;Q9P0P8	A0A0D9SEI0;Q9P0P8	Uncharacterized protein C6orf203	C6orf203	26.6488	-0.542553	-0.346188	-0.379695	-0.358255	0.541128	0.778189	0.531866	0.709344	n.s.	n.s.	n.s.	n.s.	n.s.	n.s.	n.s.	n.s.
Q5T321;A0A0D9SF28;F5GXV7;Q8NFP9;Q8NFP9-3;Q8NFP9-2	Q5T321;A0A0D9SF28;F5GXV7;Q8NFP9	Neurobeachin	NBEA	29.0428	0.0407571	-0.999265	1.08351	1.98663	0.107113	0.337482	0.00209704	0.9912	n.s.	AS_FvCON_F_up	n.s.	n.s.	F_up	n.s.	female	n.s.
A0A0D9SFB3;A0A2R8YF78;A0A0D9SG12;A0A2R8YFS5;A0A2R8Y4A4;A0A0D9SF53;O00571;A0A2R8Y5G6;O00571-2;F6S8Q4;A0A2R8YDT5;A0A2R8Y7T2;A0A2R8YDH3;A0A0J9YVQ7;A0A087WVZ1;A0A2R8YCU0;A0A2R8Y650;A0A087WX09;A0A2R8Y4D2;D6RCM4;Q9NQI0-3;Q9NQI0-2;Q9NQI0-4;Q9NQI0;A0A2R8Y770;H0Y960	A0A0D9SFB3;A0A2R8YF78;A0A0D9SG12;A0A2R8YFS5;A0A2R8Y4A4;A0A0D9SF53;O00571;A0A2R8Y5G6;O00571-2;F6S8Q4;A0A2R8YDT5;A0A2R8Y7T2;A0A2R8YDH3	ATP-dependent RNA helicase DDX3X	DDX3X	30.8808	-0.54232	0.0954647	-0.152114	-0.747736	0.265613	0.7259	4.83401e-08	0.0095299	n.s.	AS_FvCON_F_do	n.s.	MR_FvCON_F_do	F_do	F_do	female	female
A0A0D9SF54;A0A0D9SFF6;A0A0D9SFH4;A0A1B0GTB7;A0A1B0GV13;A0A1B0GW19;A0A1B0GWE2;A0A1B0GUH3	A0A0D9SF54		SPTAN1	28.356	0.17105	-0.106119	0.251738	-0.410376	0.715909	0.939982	0.482401	0.94865	n.s.	n.s.	n.s.	n.s.	n.s.	n.s.	n.s.	n.s.
A0A0D9SFK2;Q92614-4;Q92614;Q92614-3;Q92614-2;Q92614-5;H0YEV9	A0A0D9SFK2;Q92614-4;Q92614;Q92614-3;Q92614-2;Q92614-5	Unconventional myosin-XVIIIa	MYO18A	30.5686	0.419722	0.295791	-0.0554517	-0.13783	0.883236	0.564986	0.654325	0.510664	n.s.	n.s.	n.s.	n.s.	n.s.	n.s.	n.s.	n.s.
A0A0D9SG72;P61764;A0A1B0GWF2;A0A1B0GVQ5;A0A2R8Y5D4;A0A1B0GTP9;P61764-2;A0A1B0GW76;A0A0D9SFQ7;A0A0D9SFW6;A0A0D9SEP9;A0A0D9SEH5;A0A096LP52;A0A096LP33;A0A1B0GVV9	A0A0D9SG72;P61764;A0A1B0GWF2;A0A1B0GVQ5;A0A2R8Y5D4;A0A1B0GTP9;P61764-2;A0A1B0GW76	Syntaxin-binding protein 1	STXBP1	26.918	0.955728	0.350823	0.437231	0.0659931	0.400619	0.724297	0.908237	0.326107	n.s.	n.s.	n.s.	n.s.	n.s.	n.s.	n.s.	n.s.
A0A0D9SGF6	A0A0D9SGF6		SPTAN1	35.9634	0.27219	0.302539	0.149468	0.116624	0.104452	0.00714364	0.200183	0.0792658	n.s.	n.s.	MR_MvCON_M_up	n.s.	n.s.	M_up	n.s.	male
A0A0G2JH68;O60610;A0A140T8Z0;O60610-2;O60610-3;A0A2R8Y5N1;B4E2I7;A0A2R8YEF8	A0A0G2JH68;O60610;A0A140T8Z0;O60610-2;O60610-3;A0A2R8Y5N1	Protein diaphanous homolog 1	DIAPH1	26.6165	-1.11196	0.603583	0.431593	-0.737306	0.572387	0.632399	0.26609	0.438883	n.s.	n.s.	n.s.	n.s.	n.s.	n.s.	n.s.	n.s.
A0A0G2JIW1;P0DMV9;P0DMV8;P0DMV8-2;V9GZ37	A0A0G2JIW1;P0DMV9;P0DMV8;P0DMV8-2;V9GZ37	Heat shock 70 kDa protein 1B;Heat shock 70 kDa protein 1A	HSPA1B	35.3635	-0.282935	-0.20768	-0.183471	-0.262592	0.221824	0.37331	0.0644559	0.34319	n.s.	n.s.	n.s.	n.s.	n.s.	n.s.	n.s.	n.s.
A0A0G2JJD3;O95870;O95870-2;A0A0G2JI89;F2Z3H2;F2Z3G6	A0A0G2JJD3;O95870;O95870-2	Abhydrolase domain-containing protein 16A	ABHD16A	27.8129	-0.466156	0.0603962	-0.444221	-0.490054	0.281567	0.951098	0.205935	0.635449	n.s.	n.s.	n.s.	n.s.	n.s.	n.s.	n.s.	n.s.
A0A182DWF4;A0A0G2JJV3;Q5EP54;A0A182DWG2;A0A140T9A5;A0A140T966;A0A182DWF5;A0A140T9Q1;A0A140T928	A0A182DWF4;A0A0G2JJV3;Q5EP54;A0A182DWG2;A0A140T9A5;A0A140T966;A0A182DWF5;A0A140T9Q1;A0A140T928		HLA-DPB1	24.7997	-0.893174	0.309221	-0.694479	-0.959307	0.397908	0.8703	0.195579	0.635449	n.s.	n.s.	n.s.	n.s.	n.s.	n.s.	n.s.	n.s.
A0A0G2JMH6;P01903;Q30118;A0A0G2JH46	A0A0G2JMH6;P01903;Q30118;A0A0G2JH46	HLA class II histocompatibility antigen, DR alpha chain	HLA-DRA	28.5567	0.874802	0.00419886	-0.603519	-0.276665	0.213596	0.997773	0.583996	0.370266	n.s.	n.s.	n.s.	n.s.	n.s.	n.s.	n.s.	n.s.
A0A0G2JNW7;Q9Y666;A0A0G2JQE3;H0YB78;Q9Y666-2	A0A0G2JNW7;Q9Y666;A0A0G2JQE3;H0YB78	Solute carrier family 12 member 7	SLC12A7	24.7102	-1.29747	-0.386664	0.457394	-0.922522	0.501969	0.778189	0.117067	0.273273	n.s.	n.s.	n.s.	n.s.	n.s.	n.s.	n.s.	n.s.
E9PNT2;E9PIR1;A0A0G2JRG8;A0A0G2JNY3;Q6ZUM4-2;Q6ZUM4;A0A0C4DGE6;Q6ZUM4-3;E9PNX6	E9PNT2;E9PIR1;A0A0G2JRG8;A0A0G2JNY3;Q6ZUM4-2;Q6ZUM4;A0A0C4DGE6;Q6ZUM4-3	Rho GTPase-activating protein 27	ARHGAP27	26.7165	-1.91285	-0.524179	1.45776	-1.339	0.497827	0.916836	0.505624	0.711497	n.s.	n.s.	n.s.	n.s.	n.s.	n.s.	n.s.	n.s.
A0A0G2JNZ2;A0A0G2JPP5;Q14160;Q14160-3;A0A0G2JMS7;Q14160-2;H0YCG0;H0YDF9	A0A0G2JNZ2;A0A0G2JPP5;Q14160;Q14160-3;A0A0G2JMS7;Q14160-2	Protein scribble homolog	SCRIB	25.8279	-0.492872	0.336645	0.308121	-0.637925	0.810926	0.901125	0.55007	0.897411	n.s.	n.s.	n.s.	n.s.	n.s.	n.s.	n.s.	n.s.
A0A0J9YX62;O75190-3;C9J2C4;C9J2P2;C9JDX6;F8WCZ4;C9JDR7;C9JB42;C9JN01;Q8WWF6;Q8NHS0;Q7Z6W7	A0A0J9YX62;O75190-3;C9J2C4;C9J2P2	DnaJ homolog subfamily B member 6	DNAJB6	29.5058	-0.0742851	0.11272	-0.168336	-0.111637	0.313304	0.736349	0.498161	0.905336	n.s.	n.s.	n.s.	n.s.	n.s.	n.s.	n.s.	n.s.
J3QT77;A0A0J9YYG4;A0A0J9YXF2;Q15165-3;Q15165-1;Q15165;G3XAK4;A0A0J9YYJ1;A0A0J9YXU7;A0A2Q2SAK4;A0A0J9YXM1	J3QT77;A0A0J9YYG4;A0A0J9YXF2;Q15165-3;Q15165-1;Q15165;G3XAK4	Serum paraoxonase/arylesterase 2	PON2	27.4195	0.460123	0.175509	-0.275625	-0.0750345	0.712985	0.909434	0.916777	0.808383	n.s.	n.s.	n.s.	n.s.	n.s.	n.s.	n.s.	n.s.
E9PC62;A0A0J9YXJ0;V9GYD9;Q5VZZ6;A0A0J9YX66;A0A1B0GU44;A0A1B0GUN8;O95319-5;O95319-2;O95319;O95319-4;O95319-3;V9GY47;A0A0J9YXK1	E9PC62;A0A0J9YXJ0;V9GYD9;Q5VZZ6;A0A0J9YX66;A0A1B0GU44;A0A1B0GUN8;O95319-5;O95319-2;O95319;O95319-4;O95319-3	CUGBP Elav-like family member 2	CELF2	25.6743	-0.307993	-0.464093	-0.867768	-1.21695	0.253763	0.778189	0.0846768	0.918531	n.s.	n.s.	n.s.	n.s.	n.s.	n.s.	n.s.	n.s.
A0A0J9YXN7;Q96Q06	A0A0J9YXN7;Q96Q06	Perilipin-4	PLIN4	27.8523	-0.909233	0.0855977	-1.04396	-0.916227	0.115476	0.963326	0.157601	0.556405	n.s.	n.s.	n.s.	n.s.	n.s.	n.s.	n.s.	n.s.
A0A0J9YYF7;Q86T65-4;Q86T65;A0A0J9YX09;F2Z2Q2	A0A0J9YYF7;Q86T65-4;Q86T65	Disheveled-associated activator of morphogenesis 2	DAAM2	24.9649	1.3296	0.0375969	0.0874537	1.61718	0.931951	0.98519	0.0206879	0.38037	n.s.	AS_FvCON_F_up	n.s.	n.s.	F_up	n.s.	female	n.s.
A0A0R4J2G3;Q6PIU2;A0A0A0MTJ9;Q6PIU2-2;Q6PIU2-3;H7C046;F8WE33	A0A0R4J2G3;Q6PIU2;A0A0A0MTJ9;Q6PIU2-2;Q6PIU2-3;H7C046	Neutral cholesterol ester hydrolase 1	NCEH1	31.1226	-0.183428	0.0112132	-0.421721	-0.279617	0.0774081	0.986518	0.24562	0.809721	n.s.	n.s.	n.s.	n.s.	n.s.	n.s.	n.s.	n.s.
A0A3B3ISJ1;A0A0S2Z4L3;P07225;G5E9F8;A0A3B3IRK9;H7BXT0;A0A3B3IUA6;C9K0R0;A0A3B3ITZ7	A0A3B3ISJ1;A0A0S2Z4L3;P07225;G5E9F8;A0A3B3IRK9	Vitamin K-dependent protein S	PROS1	26.7042	0.511684	1.5272	1.78131	1.22444	0.0414562	0.242143	0.165338	0.87167	AS_MvCON_M_up	n.s.	n.s.	n.s.	M_up	n.s.	male	n.s.
A0A0U1RQK4;Q8NDY3;Q8NDY3-2;X6RL45	A0A0U1RQK4		ADPRHL1	33.2306	-0.145877	0.0703946	0.226034	-0.0547062	0.277943	0.894085	0.81232	0.81871	n.s.	n.s.	n.s.	n.s.	n.s.	n.s.	n.s.	n.s.
A0A0U1RQQ9;Q6P3W7;F8VSC5;H0YI32;H0YIK6	A0A0U1RQQ9;Q6P3W7;F8VSC5	SCY1-like protein 2	SCYL2	24.7005	-0.768499	0.619327	-0.373021	-0.353217	0.65159	0.642335	0.637468	0.664271	n.s.	n.s.	n.s.	n.s.	n.s.	n.s.	n.s.	n.s.
A0A0U1RQW6;Q9Y2E4-2;H0Y5A8;H0Y7Q3	A0A0U1RQW6		DIP2C	25.974	-0.84517	-0.277402	-0.448867	-0.607737	0.541056	0.865105	0.350415	0.570425	n.s.	n.s.	n.s.	n.s.	n.s.	n.s.	n.s.	n.s.
A0A0U1RR32;A0A0U1RRH7;P20671;Q99878;Q96KK5;Q9BTM1;P0C0S8;Q7L7L0;P04908;H0YFX9;A0A3B3IS11;Q93077;Q9BTM1-2	A0A0U1RR32;A0A0U1RRH7;P20671;Q99878;Q96KK5;Q9BTM1;P0C0S8;Q7L7L0;P04908;H0YFX9;A0A3B3IS11;Q93077;Q9BTM1-2	Histone H2A type 1-D;Histone H2A type 1-J;Histone H2A type 1-H;Histone H2A.J;Histone H2A type 1;Histone H2A type 3;Histone H2A type 1-B/E;Histone H2A;Histone H2A type 1-C	hCG_2039566	33.7448	0.087637	0.303717	-0.466932	-0.423481	0.0921318	0.54086	0.11878	0.94865	n.s.	n.s.	n.s.	n.s.	n.s.	n.s.	n.s.	n.s.
A0A0U1RRB6;Q9Y2D4;J3QT38;Q9Y2D4-2;F8W6R7	A0A0U1RRB6;Q9Y2D4;J3QT38;Q9Y2D4-2	Exocyst complex component 6B	EXOC6B	26.9582	0.200016	0.107411	-0.941456	-0.27388	0.0715656	0.939964	0.632846	0.931288	n.s.	n.s.	n.s.	n.s.	n.s.	n.s.	n.s.	n.s.
A0A0U1RRL8;Q8TB22;Q8TB22-2;Q8TB22-3;Q8TB22-4;H0Y9W3	A0A0U1RRL8;Q8TB22;Q8TB22-2;Q8TB22-3;Q8TB22-4	Spermatogenesis-associated protein 20	SPATA20	29.6644	0.00516889	-0.362683	-0.0514293	-0.443226	0.93817	0.707324	0.352045	0.995769	n.s.	n.s.	n.s.	n.s.	n.s.	n.s.	n.s.	n.s.
O19617;A2AEA2;A0A140T9H5;P10321;A0A140T921;A0A140T9U8;A0A1W2PRU9	O19617;A2AEA2;A0A140T9H5;P10321;A0A140T921;A0A140T9U8;A0A1W2PRU9	HLA class I histocompatibility antigen, Cw-7 alpha chain	HLA-C	25.2876	0.806633	0.662853	0.990925	-0.197155	0.204245	0.657321	0.82424	0.688259	n.s.	n.s.	n.s.	n.s.	n.s.	n.s.	n.s.	n.s.
A0A140T9J9;Q29963;A0A1W2PR11;A0A140T962;A0A140T9B3;A0A1W2PRX1;A0A1W2PP77;A0A140TA05;A0A140T9L3;A0A140T9E1;F8W9Z8;A0A140TA12;Q31611;A0A0G2JNX1;P17693-6;P17693-2;A0A0G2JPT2	A0A140T9J9;Q29963;A0A1W2PR11;A0A140T962;A0A140T9B3;A0A1W2PRX1;A0A1W2PP77	HLA class I histocompatibility antigen, Cw-6 alpha chain	HLA-C	24.7023	0.964562	-0.728574	-0.434833	0.909923	0.685569	0.674941	0.304337	0.671049	n.s.	n.s.	n.s.	n.s.	n.s.	n.s.	n.s.	n.s.
A0A140T9T7;Q03518;A0A0S2Z4R8	A0A140T9T7;Q03518	Antigen peptide transporter 1	TAP1	24.961	-0.43951	0.210925	-0.0484551	-1.46517	0.962615	0.908376	0.0313472	0.857039	n.s.	AS_FvCON_F_do	n.s.	n.s.	F_do	n.s.	female	n.s.
A0A140TA41;A0A140T9C0;P22105-1;P22105;P22105-4;A0A140T8Z8;A0A140T956;A0A140T9L7;A0A087X0I0;P22105-2	A0A140TA41;A0A140T9C0;P22105-1;P22105;P22105-4;A0A140T8Z8;A0A140T956	Tenascin-X	TNXB	25.2008	1.65352	0.560965	-0.0178664	1.9245	0.990498	0.754666	0.0147529	0.326107	n.s.	AS_FvCON_F_up	n.s.	n.s.	F_up	n.s.	female	n.s.
A0A140TA86;Q5XKP0;K7EIR2;A0A140TA84	A0A140TA86;Q5XKP0;K7EIR2;A0A140TA84	Protein QIL1	C19orf70	30.8365	-0.324192	-0.328193	-0.627379	-0.592134	0.022441	0.507568	0.0299862	0.656494	AS_MvCON_M_do	AS_FvCON_F_do	n.s.	n.s.	shared_do	n.s.	both	n.s.
A0A182DWF2;A0A182DWF3;Q9NNW7-2;Q9NNW7;D3YTF8;A0A096LPK7;Q9NNW7-3;Q9NNW7-4;A0A096LPD9;E7EWK1;A0A096LNY7	A0A182DWF2;A0A182DWF3;Q9NNW7-2;Q9NNW7;D3YTF8;A0A096LPK7;Q9NNW7-3;Q9NNW7-4;A0A096LPD9;E7EWK1	Thioredoxin reductase 2, mitochondrial	TXNRD2	30.7241	0.16002	-0.481708	-0.244653	-0.0280688	0.290459	0.0955409	0.9146	0.820588	n.s.	n.s.	n.s.	n.s.	n.s.	n.s.	n.s.	n.s.
A0A182DWI3;Q16881-6;F8W809;A0A087WSW9;A0A087WSY9;Q16881-5;Q16881-2;Q16881-4;Q16881-3;Q16881;E9PIR7;E2QRB9;Q16881-7;E9PKD3;A0A0B4J225;E9PIZ5;E9PLT3;E9PKI4;E9PQI3;E9PJU2;E9PRI8	A0A182DWI3;Q16881-6;F8W809;A0A087WSW9;A0A087WSY9;Q16881-5;Q16881-2;Q16881-4;Q16881-3;Q16881;E9PIR7;E2QRB9;Q16881-7	Thioredoxin reductase 1, cytoplasmic	TXNRD1	31.5289	-0.0350354	0.282744	0.510816	0.0545908	0.00868308	0.379385	0.815991	0.977248	AS_MvCON_M_up	n.s.	n.s.	n.s.	M_up	n.s.	male	n.s.
A0A1B0GTC3;A0A1B0GVH5;Q9C0B1;A0A1B0GUC3;A0A1B0GV98;A0A1B0GTC5;A0A1B0GU26;A0A1B0GTY1;A0A1B0GUY7;A0A1B0GTI3;Q9C0B1-4;Q9C0B1-2;A0A1B0GTZ8;Q9C0B1-3;F8WCB8	A0A1B0GTC3;A0A1B0GVH5;Q9C0B1;A0A1B0GUC3;A0A1B0GV98;A0A1B0GTC5;A0A1B0GU26;A0A1B0GTY1	Alpha-ketoglutarate-dependent dioxygenase FTO	FTO	25.3598	0.129217	-0.454328	-1.26777	-0.477669	0.0516317	0.754141	0.492856	0.973888	n.s.	n.s.	n.s.	n.s.	n.s.	n.s.	n.s.	n.s.
A0A1B0GWJ0;A0A1B0GTJ7;P30566;A0A0A6YY92;P30566-2;A0A096LNY6;A0A1B0GWF8;A0A1B0GTG9;A0A096LNY5;A0A096LPA2;A0A096LP92;A0A096LNY4;A0A096LP76;B4DEP1;A0A096LP72;V9GY96;A0A1W2PRX2;A0A096LNT0	A0A1B0GWJ0;A0A1B0GTJ7;P30566;A0A0A6YY92;P30566-2;A0A096LNY6;A0A1B0GWF8;A0A1B0GTG9	Adenylosuccinate lyase	ADSL	29.589	-0.0491044	-0.0663989	-0.278016	-0.268077	0.205225	0.906671	0.205442	0.967066	n.s.	n.s.	n.s.	n.s.	n.s.	n.s.	n.s.	n.s.
A0A1B0GTL5;Q9BXF6	A0A1B0GTL5;Q9BXF6	Rab11 family-interacting protein 5	RAB11FIP5	25.1496	-0.832851	1.3741	1.85833	0.290351	0.000174204	0.0276151	0.592646	0.45815	AS_MvCON_M_up	n.s.	MR_MvCON_M_up	n.s.	M_up	M_up	male	male
A0A1B0GW68;A0A1B0GUA4;A0A1B0GTM3;Q13510;Q13510-2;E7EMM4;A0A1B0GTZ5;A0A1B0GUH5;A0A1B0GUE3;A0A1B0GUW4;A0A1B0GUG1;A0A1B0GTP7;Q13510-3;A0A1B0GVG2;A0A1B0GV06;A0A1B0GUB3;A0A1B0GU62;A0A1B0GW48;A0A1B0GVJ1;A0A1B0GVE7;A0A1B0GU06;A0A1B0GV95;A0A1B0GUJ3;A0A1B0GW66;A0A1B0GVA3;A0A1B0GV88	A0A1B0GW68;A0A1B0GUA4;A0A1B0GTM3;Q13510;Q13510-2;E7EMM4;A0A1B0GTZ5;A0A1B0GUH5;A0A1B0GUE3;A0A1B0GUW4;A0A1B0GUG1;A0A1B0GTP7;Q13510-3;A0A1B0GVG2;A0A1B0GV06;A0A1B0GUB3	Acid ceramidase;Acid ceramidase subunit alpha;Acid ceramidase subunit beta	ASAH1	33.4504	0.130774	-0.163625	-0.264841	-0.0723517	0.218442	0.705522	0.761215	0.85525	n.s.	n.s.	n.s.	n.s.	n.s.	n.s.	n.s.	n.s.
A0A1B0GTU4;P49023-2;P49023-3;A0A1B0GU60;A0A1B0GV30;F5H836;A0A1B0GWE7;REV__D6RBA6	A0A1B0GTU4;P49023-2;P49023-3;A0A1B0GU60	Paxillin	PXN	28.2879	-0.0645173	0.524612	0.400901	-0.029923	0.40566	0.490124	0.95599	0.981604	n.s.	n.s.	n.s.	n.s.	n.s.	n.s.	n.s.	n.s.
A0A1B0GUA3;Q96EK5;A0A0D9SFK7;A0A1B0GTE6;A0A1B0GUH6;A0A1B0GV79;A0A1B0GVY9;A0A1B0GW21;A0A1B0GU96	A0A1B0GUA3;Q96EK5	KIF1-binding protein	KIF1BP	27.2673	-0.163611	0.114249	0.48961	-0.66178	0.749871	0.971118	0.613785	0.9827	n.s.	n.s.	n.s.	n.s.	n.s.	n.s.	n.s.	n.s.
A0A1B0GUZ7;Q14156;Q14156-3;Q14156-2;E5RJS1	A0A1B0GUZ7;Q14156;Q14156-3;Q14156-2	Protein EFR3 homolog A	EFR3A	24.3031	1.60911	0.942962	0.770296	1.36456	0.271465	0.377268	0.0332066	0.190777	n.s.	AS_FvCON_F_up	n.s.	n.s.	F_up	n.s.	female	n.s.
A0A1B0GV18;A0A087WVP2;Q7Z6J6-2;Q7Z6J6;H0YKW6;H0Y5N1;B5MC67	A0A1B0GV18;A0A087WVP2;Q7Z6J6-2;Q7Z6J6;H0YKW6;H0Y5N1;B5MC67	FERM domain-containing protein 5	FRMD5	28.0317	-0.171183	-0.0787759	-0.173029	-0.493901	0.786604	0.948866	0.331358	0.940132	n.s.	n.s.	n.s.	n.s.	n.s.	n.s.	n.s.	n.s.
A0A1B0GVD5;A0A1B0GWE8;P07339;A0A1B0GW44;A0A1B0GV23;A0A1B0GVP3;A0A1B0GU92;A0A1B0GU03;C9JH19;H7C469;F8WD96;H7C1V0	A0A1B0GVD5;A0A1B0GWE8;P07339;A0A1B0GW44;A0A1B0GV23;A0A1B0GVP3;A0A1B0GU92;A0A1B0GU03;C9JH19;H7C469;F8WD96	Cathepsin D;Cathepsin D light chain;Cathepsin D heavy chain	CTSD	34.8935	0.0280251	-0.0884589	-0.0535218	0.228338	0.828197	0.859325	0.225976	0.981604	n.s.	n.s.	n.s.	n.s.	n.s.	n.s.	n.s.	n.s.
A0A1B0GVY1;Q96PU5-9;Q96PU5-4;K7ERN1;K7ENS6	A0A1B0GVY1;Q96PU5-9;Q96PU5-4		NEDD4L	24.396	0.963357	0.966665	0.307633	0.156626	0.75304	0.456201	0.865345	0.61488	n.s.	n.s.	n.s.	n.s.	n.s.	n.s.	n.s.	n.s.
A0A1B0GW05;Q2PZI1;H7C3M5;Q2PZI1-2;H7C1I8;Q6NUT2;F5H1L7	A0A1B0GW05;Q2PZI1	Probable C-mannosyltransferase DPY19L1	DPY19L1	25.4625	-0.419529	0.348629	-0.45961	-1.30906	0.481358	0.800407	0.0189586	0.822594	n.s.	AS_FvCON_F_do	n.s.	n.s.	F_do	n.s.	female	n.s.
A0A1B0GW50	A0A1B0GW50		ZEB2	24.532	0.767753	0.00340281	-0.445247	0.359418	0.856792	0.999173	0.870634	0.918931	n.s.	n.s.	n.s.	n.s.	n.s.	n.s.	n.s.	n.s.
A0A1B0GW72;Q96PX9;Q96HN1	A0A1B0GW72;Q96PX9	Pleckstrin homology domain-containing family G member 4B	PLEKHG4B	25.6439	0.566405	0.281339	0.655214	0.400134	0.575865	0.916804	0.726907	0.878539	n.s.	n.s.	n.s.	n.s.	n.s.	n.s.	n.s.	n.s.
A0A1C7CYX9;Q16555;Q16555-2;E5RFU4	A0A1C7CYX9;Q16555;Q16555-2	Dihydropyrimidinase-related protein 2	DPYSL2	33.4034	0.472254	0.477694	0.161291	0.094388	0.404367	0.0276151	0.619873	0.128557	n.s.	n.s.	MR_MvCON_M_up	n.s.	n.s.	M_up	n.s.	male
A0A1W2PP57;A0A1W2PPC3;A0A1W2PPS0;A0A1W2PNP0;Q969N2-5;Q969N2;A0A1W2PQN1;Q969N2-4;A0A1W2PPR6;F6W983;A0A1W2PPQ7;Q969N2-2;A0A1W2PQY1;A0A1W2PRZ8;A0A1W2PR92;Q969N2-6;A0A1W2PPK4;A0A1W2PQ52;A0A1W2PP13;A0A1W2PSC5;A0A1W2PRH2;Q969N2-3;H7C2Y2;A0A1W2PPI8;A0A1W2PRG1;A0A1W2PNW9;A0A1W2PRV7;A0A1W2PRH8;A0A1W2PPU8;A0A1W2PR22;B7Z7C5;A0A1W2PP03;A0A1W2PR73;A0A1W2PNZ5;A0A1W2PNS2;A0A1W2PP98;A0A1W2PQL3;A0A1W2PR34;A0A1W2P…	A0A1W2PP57;A0A1W2PPC3;A0A1W2PPS0;A0A1W2PNP0;Q969N2-5;Q969N2;A0A1W2PQN1;Q969N2-4;A0A1W2PPR6;F6W983;A0A1W2PPQ7;Q969N2-2;A0A1W2PQY1;A0A1W2PRZ8;A0A1W2PR92;Q969N2-6	GPI transamidase component PIG-T	PIGT	24.5905	-0.668004	-0.108358	-0.411229	-0.338913	0.575224	0.943382	0.619683	0.691677	n.s.	n.s.	n.s.	n.s.	n.s.	n.s.	n.s.	n.s.
A0A1W2PNR9;Q9Y5U9	A0A1W2PNR9;Q9Y5U9	Immediate early response 3-interacting protein 1	IER3IP1	27.571	0.386002	0.400338	-0.0236217	-0.257319	0.982125	0.74556	0.681316	0.837334	n.s.	n.s.	n.s.	n.s.	n.s.	n.s.	n.s.	n.s.
A0A1W2PNV4;E9PF58	A0A1W2PNV4;E9PF58		ARPC1A	28.9589	-0.199776	-0.677487	0.00659055	-0.103044	0.989763	0.0619396	0.750906	0.829854	n.s.	n.s.	n.s.	n.s.	n.s.	n.s.	n.s.	n.s.
A0A1W2PP11;Q9H300;F8WCQ4;A0A1W2PS40;C9JNP8;Q9H300-2;H7C0U0;A0A1W2PP66	A0A1W2PP11;Q9H300;F8WCQ4;A0A1W2PS40;C9JNP8;Q9H300-2;H7C0U0	Presenilins-associated rhomboid-like protein, mitochondrial;P-beta	PARL	25.3384	0.0110951	0.23628	-0.4827	-0.50017	0.572387	0.903289	0.522797	0.99575	n.s.	n.s.	n.s.	n.s.	n.s.	n.s.	n.s.	n.s.
A0A1W2PPG5;A0A1W2PPP5;A0A1W2PPG1;A0A1W2PQM3;A0A1W2PS81;E7EQ34;I3NI02;O14653;O14653-2;A0A1W2PRV0;I3L4Z6;A0A1W2PRC2;O14653-3;A0A1W2PR23;A0A1W2PPW8;A0A1W2PR02;A0A1W2PS12;A0A1X7SBU8;A0A1W2PRL0;I3L0K1;A0A1W2PRP7;A0A1W2PQP2;I3L1K7;A0A1W2PNV3;A0A1W2PQ77;A0A1W2PRE6;A0A1W2PQ06;A0A1W2PQE0;A0A1W2PRD0;A0A1W2PQ38;A0A1W2PQQ4;A0A1W2PQ12	A0A1W2PPG5;A0A1W2PPP5;A0A1W2PPG1;A0A1W2PQM3;A0A1W2PS81;E7EQ34;I3NI02;O14653;O14653-2;A0A1W2PRV0;I3L4Z6;A0A1W2PRC2;O14653-3;A0A1W2PR23;A0A1W2PPW8;A0A1W2PR02;A0A1W2PS12;A0A1X7SBU8;A0A1W2PRL0;I3L0K1;A0A1W2PRP7;A0A1W2PQP2;I3L1K7;A0A1W2PNV3;A0A1W2PQ77;A0A1W2PRE6;A0A1W2PQ06;A0A1W2PQE0	Golgi SNAP receptor complex member 2	GOSR2	26.978	-0.241784	-0.716918	-0.916807	0.142074	0.462012	0.778189	0.9146	0.968175	n.s.	n.s.	n.s.	n.s.	n.s.	n.s.	n.s.	n.s.
A0A1X7SBZ2;A0A1W2PQ51;Q92841;Q92841-1;Q92841-3;Q92841-2;A0A0U1RQJ0	A0A1X7SBZ2;A0A1W2PQ51;Q92841;Q92841-1;Q92841-3;Q92841-2	Probable ATP-dependent RNA helicase DDX17	DDX17	29.5907	0.0125914	0.203177	-0.180615	-0.423839	0.42398	0.593338	0.0311717	0.9912	n.s.	AS_FvCON_F_do	n.s.	n.s.	F_do	n.s.	female	n.s.
A0A1W2PQS6;F6U211;A0A2R8Y7H1;S4R435;A0A2R8YFH6;A0A2R8Y6L3	A0A1W2PQS6;F6U211;A0A2R8Y7H1;S4R435;A0A2R8YFH6;A0A2R8Y6L3		RPS10-NUDT3	29.7504	-0.478135	-0.194306	-0.998838	-0.714996	9.12284e-05	0.724079	0.00427312	0.375493	AS_MvCON_M_do	AS_FvCON_F_do	n.s.	n.s.	shared_do	n.s.	both	n.s.
A0A1W2PS24;Q5SRN5;P04439;Q5SRN7	A0A1W2PS24;Q5SRN5;P04439;Q5SRN7	HLA class I histocompatibility antigen, A-3 alpha chain	HLA-A	27.3934	0.250841	-0.433249	0.281776	-1.34119	0.831722	0.865202	0.183903	0.96479	n.s.	n.s.	n.s.	n.s.	n.s.	n.s.	n.s.	n.s.
A0A1W2PS43;Q14108;A0A1W2PQR6;A0A1W2PQB7;A0A1W2PRS1;A0A1W2PPX5;A0A1W2PPU6;A0A1W2PRF6;Q14108-2;A0A1W2PSE4;A0A1W2PQL5;D6RDG0;A0A1W2PS70;A0A1W2PNX7;A0A1W2PPX6	A0A1W2PS43;Q14108;A0A1W2PQR6;A0A1W2PQB7;A0A1W2PRS1;A0A1W2PPX5;A0A1W2PPU6;A0A1W2PRF6;Q14108-2	Lysosome membrane protein 2	SCARB2	29.8171	0.255015	-0.164074	-0.431447	-0.394672	0.0572548	0.740394	0.0772393	0.668593	n.s.	n.s.	n.s.	n.s.	n.s.	n.s.	n.s.	n.s.
A0A286YF22;O43175;A0A2C9F2M7;A0A286YFL2;A0A286YFA2;A0A286YFM8;A0A286YF78;A0A286YFE1;A0A286YER3;A0A286YFC8;A0A286YFB2;A0A286YF34;A0A286YFF3;A0A286YFK5	A0A286YF22;O43175;A0A2C9F2M7;A0A286YFL2;A0A286YFA2	D-3-phosphoglycerate dehydrogenase	PHGDH	27.3334	0.484035	0.367748	-0.977315	-1.23502	0.235788	0.859761	0.110211	0.85822	n.s.	n.s.	n.s.	n.s.	n.s.	n.s.	n.s.	n.s.
A0A2C9F2P4;A0A286YFF7;P50897;Q5T0S4;A0A286YFE3;A0A286YFL8;P50897-2;E9PK48;A0A286YFL6	A0A2C9F2P4;A0A286YFF7;P50897;Q5T0S4;A0A286YFE3;A0A286YFL8;P50897-2	Palmitoyl-protein thioesterase 1	PPT1	29.7418	0.290796	0.139347	0.0194029	-0.251331	0.972615	0.881238	0.512798	0.789549	n.s.	n.s.	n.s.	n.s.	n.s.	n.s.	n.s.	n.s.
A0A2Q2TTZ9;P01594;P01593	A0A2Q2TTZ9;P01594;P01593	Ig kappa chain V-I region AU;Ig kappa chain V-I region AG	IGKV1D-33	29.7092	1.60364	1.56714	1.03008	0.419351	0.10479	0.0519161	0.534906	0.16204	n.s.	n.s.	n.s.	n.s.	n.s.	n.s.	n.s.	n.s.
A0A2Q3DP09;Q7Z3E5-2;Q7Z3E5;H7C2P6;C9JW07;H7C3U7;H7BZY2	A0A2Q3DP09;Q7Z3E5-2;Q7Z3E5	LisH domain-containing protein ARMC9	ARMC9	24.7947	0.623193	-0.314348	0.709291	0.656598	0.454216	0.887587	0.457509	0.81991	n.s.	n.s.	n.s.	n.s.	n.s.	n.s.	n.s.	n.s.
A6NNI4;A0A2R8Y478;G8JLH6;P21926;A0A087WU13	A6NNI4;A0A2R8Y478;G8JLH6;P21926	Tetraspanin;CD9 antigen	CD9	27.3758	0.344323	1.1969	0.0791981	-0.29172	0.960485	0.519436	0.812805	0.947932	n.s.	n.s.	n.s.	n.s.	n.s.	n.s.	n.s.	n.s.
A0A2R8Y4H2;B1AHR1;Q9UH03-2;Q9UH03	A0A2R8Y4H2;B1AHR1;Q9UH03-2;Q9UH03	Neuronal-specific septin-3	SEPT3	27.8867	0.861522	0.12842	-0.190696	0.4467	0.793475	0.931132	0.450221	0.503197	n.s.	n.s.	n.s.	n.s.	n.s.	n.s.	n.s.	n.s.
A0A2R8Y4J4;Q9NWS8;A0A087WXU0;Q5SZ82;Q9NWS8-2;A0A2R8Y4P5;A0A2R8YFC3;Q9NWS8-3	A0A2R8Y4J4;Q9NWS8;A0A087WXU0;Q5SZ82;Q9NWS8-2	Required for meiotic nuclear division protein 1 homolog	RMND1	25.9093	2.33936	-0.267285	-1.11368	-0.779641	0.234368	0.908792	0.403379	0.147894	n.s.	n.s.	n.s.	n.s.	n.s.	n.s.	n.s.	n.s.
A0A2R8Y4T1;E9PGF5;A0A087WWW7;H0Y4U1;E7ERH1;E7EMG1;Q9HBL0-2;H7C3Z4;C9JI43;C9J8K5;C9JFT7;C9JZT0	A0A2R8Y4T1;E9PGF5;A0A087WWW7;H0Y4U1		TNS1	33.0245	0.767804	0.761205	0.61226	0.340894	0.000396593	0.000328543	0.0496428	0.00725361	AS_MvCON_M_up	AS_FvCON_F_up	MR_MvCON_M_up	MR_FvCON_F_up	shared_up	shared_up	both	both
A0A2R8Y4Y7;Q9UQ90;A0A2R8Y7B8;A0A2R8YFW4;A0A2U3TZH1;A0A2R8YDQ1;A0A2R8Y726;A0A2R8Y3M4;A0A2R8Y6K2;A0A2R8Y7E2;A0A2R8YGZ0;A0A2R8Y6E8;A0A2R8YFJ7;A0A2R8YG79;A0A2R8Y4M0;A0A2R8YFF4;A0A2R8Y632;A0A2R8Y729;Q9UQ90-2;A0A2R8Y7N2;A0A2R8YEH4;A0A2R8Y4M8;A0A2R8Y6Z7;A0A2R8YFN9;A0A2R8Y4Z7;H3BTY6;A0A2R8Y4L7;A0A2R8YGV4;A0A2R8Y4L0;A0A2R8Y617;H3BTR8;H3BMP1;A0A2R8YFQ9;H3BNE4;A0A2R8Y856;A0A2R8YDW8;A0A087X0F5	A0A2R8Y4Y7;Q9UQ90;A0A2R8Y7B8;A0A2R8YFW4;A0A2U3TZH1;A0A2R8YDQ1;A0A2R8Y726;A0A2R8Y3M4;A0A2R8Y6K2;A0A2R8Y7E2;A0A2R8YGZ0;A0A2R8Y6E8;A0A2R8YFJ7	Paraplegin	SPG7	30.102	-0.567231	-0.128288	-0.682038	-0.853842	0.0293531	0.872578	0.00558184	0.402897	AS_MvCON_M_do	AS_FvCON_F_do	n.s.	n.s.	shared_do	n.s.	both	n.s.
A0A2R8Y504;O43556-4;A0A2R8Y821;A0A2R8Y5P8;A0A2R8Y4X1;A0A2R8Y4E3;A0A2R8Y5X5;B7Z2R4;A0A2R8YGQ3;A0A2R8Y5R7;A0A2R8YE48;O43556;A0A2R8Y6Y5;A0A2R8Y6G8;A0A2R8Y5H7;A0A2R8YE16;A0A2R8Y628;C9JR67;A0A2R8Y6V3;A0A2R8Y621;A0A2R8Y7J1;A0A2R8YH84;A0A2R8Y5J3;A0A2R8Y4P8;A0A2R8Y652;A0A2R8Y5J6;A0A2R8Y5X0;A0A2R8Y638;A0A2R8Y5M2;O43556-3;E9PEH6;A0A2R8Y416;A0A2U3TZN7;A0A2R8Y2R1;A0A2R8Y5Q3;A0A2R8Y6U6;A0A2R8YEY2;A0A2R8YFA5;A…	A0A2R8Y504;O43556-4;A0A2R8Y821;A0A2R8Y5P8;A0A2R8Y4X1;A0A2R8Y4E3;A0A2R8Y5X5;B7Z2R4;A0A2R8YGQ3;A0A2R8Y5R7;A0A2R8YE48;O43556;A0A2R8Y6Y5;A0A2R8Y6G8;A0A2R8Y5H7;A0A2R8YE16;A0A2R8Y628;C9JR67;A0A2R8Y6V3;A0A2R8Y621;A0A2R8Y7J1;A0A2R8YH84;A0A2R8Y5J3;A0A2R8Y4P8;A0A2R8Y652;A0A2R8Y5J6;A0A2R8Y5X0;A0A2R8Y638;A0A2R8Y5M2;O43556-3;E9PEH6;A0A2R8Y416;A0A2U3TZN7;A0A2R8Y2R1;A0A2R8Y5Q3;A0A2R8Y6U6;A0A2R8YEY2;A0A2R8YFA5;A…	Epsilon-sarcoglycan	SGCE	28.6444	0.990371	0.748744	-0.197491	-0.105345	0.744022	0.301159	0.853335	0.310763	n.s.	n.s.	n.s.	n.s.	n.s.	n.s.	n.s.	n.s.
A0A2R8Y566;Q9P260-2;A0A075B768	A0A2R8Y566;Q9P260-2	LisH domain and HEAT repeat-containing protein KIAA1468	RELCH	25.2536	0.344161	0.384604	-0.395219	-0.158813	0.607806	0.805089	0.834432	0.884691	n.s.	n.s.	n.s.	n.s.	n.s.	n.s.	n.s.	n.s.
A0A2R8Y5N2;Q92574;A0A2R8YFV7;A0A2R8Y5S3;Q92574-2;A0A2R8Y6S1;Q59IT9;A0A2R8YEH9;Q86WV8;A0A2R8Y7E9;A0A2R8Y6W1;A0A2R8YGX7;A0A2R8YD74;A0A2R8Y5M3;A0A2R8YGL0;A0A2R8Y5F8;A0A2R8Y5U8;A0A2R8Y6S8;A0A2R8Y5J1;A0A2R8Y5Q4;A0A2R8Y6N1;A0A2R8Y419;A0A2R8Y756	A0A2R8Y5N2;Q92574;A0A2R8YFV7;A0A2R8Y5S3;Q92574-2;A0A2R8Y6S1	Hamartin	TSC1	28.3316	-1.26597	-0.243864	1.09178	-0.175095	0.455523	0.939982	0.911203	0.726579	n.s.	n.s.	n.s.	n.s.	n.s.	n.s.	n.s.	n.s.
A0A2R8Y5P7;P49590;A0A2R8Y3N3;P49590-2;A0A2R8Y6I1;D6RB22;B4DQ67;D6RJE6;A0A2R8Y5E8;A0A2R8Y4X6	A0A2R8Y5P7;P49590;A0A2R8Y3N3;P49590-2;A0A2R8Y6I1;D6RB22;B4DQ67;D6RJE6	Probable histidine--tRNA ligase, mitochondrial	HARS2	28.9712	-0.336603	-0.018266	-0.427888	-0.504929	0.167541	0.98305	0.0872816	0.668655	n.s.	n.s.	n.s.	n.s.	n.s.	n.s.	n.s.	n.s.
A0A2R8Y5V9;A0A2R8YGX3;A0A2R8YH90;K7EP68;K7EMU5;A0A2R8YHD2;K7EPV9	A0A2R8Y5V9;A0A2R8YGX3;A0A2R8YH90		TPM4	35.4253	-0.45382	-0.0123952	-0.0433221	0.146847	0.863314	0.981666	0.45555	0.193501	n.s.	n.s.	n.s.	n.s.	n.s.	n.s.	n.s.	n.s.
A0A2R8Y6G6;A0A2R8Y798;A0A2R8YEG5	A0A2R8Y6G6		ENO1	27.7128	0.279171	-1.14829	-1.16598	0.0155149	0.200963	0.431312	0.990419	0.94865	n.s.	n.s.	n.s.	n.s.	n.s.	n.s.	n.s.	n.s.
A0A2R8Y7X9;P69891;A0A0J9YYA3	A0A2R8Y7X9;P69891	Hemoglobin subunit gamma-1	HBG1	28.1084	3.11404	2.32527	1.40667	3.86383	0.268303	0.169535	0.000954519	0.151867	n.s.	AS_FvCON_F_up	n.s.	n.s.	F_up	n.s.	female	n.s.
A0A2R8Y851;P62273;P62273-2;A0A2R8Y6P7;A0A087WTT6	A0A2R8Y851;P62273;P62273-2;A0A2R8Y6P7;A0A087WTT6	40S ribosomal protein S29	RPS29	26.2739	-0.745349	-0.525793	0.0809413	-1.33226	0.94291	0.764099	0.0798285	0.731875	n.s.	n.s.	n.s.	n.s.	n.s.	n.s.	n.s.	n.s.
A0A2R8YCJ8;Q9NVV5-3;Q9NVV5-2;Q9NVV5;Q5T2H3;Q9NVV5-4;Q5THU2;Q5T2H0;Q5T2H4;Q9NVV5-6;Q9NVV5-5	A0A2R8YCJ8;Q9NVV5-3;Q9NVV5-2;Q9NVV5;Q5T2H3;Q9NVV5-4;Q5THU2;Q5T2H0;Q5T2H4;Q9NVV5-6;Q9NVV5-5	Androgen-induced gene 1 protein	AIG1	26.1959	-0.0504231	-1.0913	-0.653782	0.59884	0.48432	0.422613	0.493375	0.9912	n.s.	n.s.	n.s.	n.s.	n.s.	n.s.	n.s.	n.s.
A0A2R8YCY2	A0A2R8YCY2		FRY	29.4171	0.536917	0.672023	0.533724	0.826601	0.563384	0.671086	0.307043	0.838289	n.s.	n.s.	n.s.	n.s.	n.s.	n.s.	n.s.	n.s.
A0A2R8YD58;E7EU96;P68400;A0A2R8Y5A0;A0A2R8YDP2;A0A2R8YF43;A0A2R8YFU2;A0A2R8Y4D6;A0A2R8Y4H0;P68400-2;V9GYA2;A0A2R8YEW1;A0A2R8YDY7;A0A2R8YCK2;A0A2R8Y3W6;A0A2R8Y797;V9GY80;A0A2R8YF47;A0A2R8Y7T1;A0A087WY74;A0A2R8YCC9;V9GYW6;REV__E7EP72	A0A2R8YD58;E7EU96;P68400;A0A2R8Y5A0;A0A2R8YDP2;A0A2R8YF43;A0A2R8YFU2;A0A2R8Y4D6;A0A2R8Y4H0;P68400-2	Casein kinase II subunit alpha	CSNK2A1	30.2406	-0.152195	-0.110128	-0.329324	-0.349731	0.19186	0.861963	0.148205	0.857452	n.s.	n.s.	n.s.	n.s.	n.s.	n.s.	n.s.	n.s.
A0A2R8YDQ9;Q5T9Q5;A0A0U1RRI1;A0A0U1RQL1	A0A2R8YDQ9;Q5T9Q5		SUCLA2	34.3071	0.0135228	-0.254703	-0.361799	-0.129618	0.0142133	0.257786	0.413944	0.986555	AS_MvCON_M_do	n.s.	n.s.	n.s.	M_do	n.s.	male	n.s.
A0A2R8YG42;Q14155-5;Q14155-3;Q14155;F6SJA5	A0A2R8YG42;Q14155-5;Q14155-3;Q14155	Rho guanine nucleotide exchange factor 7	ARHGEF7	27.7084	0.0351562	-0.295005	-0.519994	-0.44193	0.559392	0.882005	0.592646	0.992529	n.s.	n.s.	n.s.	n.s.	n.s.	n.s.	n.s.	n.s.
A0A2U3TZH3;Q05639;A0A2R8Y488;A0A2R8Y660;A0A2R8YDN5	A0A2U3TZH3;Q05639	Elongation factor 1-alpha 2	EEF1A2	35.9104	-0.115948	-0.217139	-0.123663	0.0317044	0.460591	0.360091	0.857552	0.802213	n.s.	n.s.	n.s.	n.s.	n.s.	n.s.	n.s.	n.s.
E9PNW4;A0A2U3TZL5;E9PR17;P13987;H0YET2;E9PI80	E9PNW4;A0A2U3TZL5;E9PR17;P13987	CD59 glycoprotein	CD59	28.4755	-1.24099	-1.05085	-1.10868	-1.28803	0.185554	0.434134	0.106095	0.503197	n.s.	n.s.	n.s.	n.s.	n.s.	n.s.	n.s.	n.s.
A0A3B3IPE9;Q6ZSZ5-1;A0A087WZG4;Q6ZSZ5-2;Q6ZSZ5-6;Q6ZSZ5-5;Q6ZSZ5;M0QZS0	A0A3B3IPE9;Q6ZSZ5-1;A0A087WZG4;Q6ZSZ5-2;Q6ZSZ5-6;Q6ZSZ5-5;Q6ZSZ5;M0QZS0	Rho guanine nucleotide exchange factor 18	ARHGEF18	24.9543	-0.456642	0.753564	0.714882	1.62996	0.359289	0.571876	0.0185053	0.853338	n.s.	AS_FvCON_F_up	n.s.	n.s.	F_up	n.s.	female	n.s.
A0A3B3IRL2;O75629	A0A3B3IRL2;O75629	Protein CREG1	CREG1	26.0138	-0.409862	-1.65821	-0.729743	-1.10268	0.343084	0.0760055	0.114629	0.871572	n.s.	n.s.	n.s.	n.s.	n.s.	n.s.	n.s.	n.s.
A0A3B3IRN5;Q06828	A0A3B3IRN5;Q06828	Fibromodulin	FMOD	27.4911	1.97184	0.94736	4.27016	4.87611	0.00693349	0.80755	0.00185717	0.625963	AS_MvCON_M_up	AS_FvCON_F_up	n.s.	n.s.	shared_up	n.s.	both	n.s.
A0A3B3IRT8;P43307;C9J3L8;C9J5W0;E9PAL7;C9IZQ1;P43307-2;C9JBX5	A0A3B3IRT8;P43307;C9J3L8;C9J5W0;E9PAL7;C9IZQ1;P43307-2	Translocon-associated protein subunit alpha	SSR1	27.4043	-1.25499	-0.145982	-0.118882	-1.20766	0.794136	0.8703	0.00042152	0.0340837	n.s.	AS_FvCON_F_do	n.s.	MR_FvCON_F_do	F_do	F_do	female	female
A0A3B3ISG5;P14735;P14735-2	A0A3B3ISG5;P14735	Insulin-degrading enzyme	IDE	29.3705	-0.0261952	0.0555311	-0.537261	-0.327075	0.00240336	0.907992	0.0678514	0.981604	AS_MvCON_M_do	n.s.	n.s.	n.s.	M_do	n.s.	male	n.s.
A0A3B3ISR2;B4DPQ0;F5H2D0;P00736;A0A3B3ITU4;F5H1V0;F5H6Y3;F5H3N3;F5H3A3	A0A3B3ISR2;B4DPQ0;F5H2D0;P00736;A0A3B3ITU4	Complement C1r subcomponent;Complement C1r subcomponent heavy chain;Complement C1r subcomponent light chain	C1R	26.49	2.25107	1.69517	0.311009	0.83805	0.841706	0.37331	0.503334	0.356654	n.s.	n.s.	n.s.	n.s.	n.s.	n.s.	n.s.	n.s.
A0A3B3ISS6;Q14956-2;Q14956;Q96F58	A0A3B3ISS6;Q14956-2;Q14956	Transmembrane glycoprotein NMB	GPNMB	31.3112	0.0224496	-0.393581	0.110424	-0.364896	0.90217	0.797969	0.6006	0.993704	n.s.	n.s.	n.s.	n.s.	n.s.	n.s.	n.s.	n.s.
A0A3B3ISU0;Q02487	A0A3B3ISU0;Q02487	Desmocollin-2	DSC2	28.823	0.180125	0.103473	0.0486795	0.276067	0.909292	0.901125	0.386691	0.870222	n.s.	n.s.	n.s.	n.s.	n.s.	n.s.	n.s.	n.s.
A0A3B3ISV4	A0A3B3ISV4		VKORC1L1	25.468	0.787256	0.134538	-0.468382	-0.0105592	0.515468	0.937906	0.990446	0.61488	n.s.	n.s.	n.s.	n.s.	n.s.	n.s.	n.s.	n.s.
A0A3B3ISX9;A0A087WWA5	A0A3B3ISX9		TNXB	33.1901	1.16789	1.00776	1.18526	1.44053	0.000978359	0.0276151	6.32125e-05	0.0591446	AS_MvCON_M_up	AS_FvCON_F_up	MR_MvCON_M_up	n.s.	shared_up	M_up	both	male
A0A3B3IT47;Q9Y2I8;Q9Y2I8-2;E7EQ49;A0A087WTQ2;Q9Y2I8-3;C9JGR9	A0A3B3IT47;Q9Y2I8;Q9Y2I8-2;E7EQ49;A0A087WTQ2;Q9Y2I8-3;C9JGR9	WD repeat-containing protein 37	WDR37	26.4722	0.188841	-0.0647675	-0.527218	-0.210017	0.290875	0.961458	0.687527	0.92499	n.s.	n.s.	n.s.	n.s.	n.s.	n.s.	n.s.	n.s.
A0A3B3IT82;P54132;H0YNU5	A0A3B3IT82;P54132;H0YNU5	Bloom syndrome protein	BLM	25.5128	-0.0971269	-1.21339	0.283674	0.781682	0.830913	0.492925	0.46334	0.986373	n.s.	n.s.	n.s.	n.s.	n.s.	n.s.	n.s.	n.s.
A0A3B3ITP4;Q495G5;Q8IVH4;D6RIS5;A0A3B3IRG3	A0A3B3ITP4;Q495G5;Q8IVH4;D6RIS5	Methylmalonic aciduria type A protein, mitochondrial	MMAA	27.1191	-0.711038	-0.497462	-1.09832	-0.719243	0.0319225	0.615913	0.16229	0.562404	AS_MvCON_M_do	n.s.	n.s.	n.s.	M_do	n.s.	male	n.s.
A0A3B3ITT5;P47914	A0A3B3ITT5;P47914	60S ribosomal protein L29	RPL29	28.3811	-0.036266	0.0635078	0.288734	-0.555176	0.288685	0.927165	0.0248501	0.981604	n.s.	AS_FvCON_F_do	n.s.	n.s.	F_do	n.s.	female	n.s.
A0A3B3ITX9;H7C2G0;C9JX40;P55822-2;C9JJT2;B4DLW3;H7C1Y8;A0A096LNT6;A0A3B3IUG4;H7C3V3;A0A3B3ISA8;C9JLV3	A0A3B3ITX9;H7C2G0		WRB-SH3BGR	30.1396	-0.101287	-0.864531	0.0995939	0.194001	0.882958	0.238844	0.734234	0.97315	n.s.	n.s.	n.s.	n.s.	n.s.	n.s.	n.s.	n.s.
A0A3B3ITZ9;Q9Y2W1	A0A3B3ITZ9;Q9Y2W1	Thyroid hormone receptor-associated protein 3	THRAP3	25.2996	-0.172851	-0.548228	-0.280559	-0.521482	0.715238	0.647282	0.41408	0.955804	n.s.	n.s.	n.s.	n.s.	n.s.	n.s.	n.s.	n.s.
A0A3B3IU69;O00423;O00423-3;G3V3N9;G3V4H6;G3V538;G3V5C8;G3V3J1;H0YJK4;H0YJY3;H0YJD8	A0A3B3IU69;O00423;O00423-3	Echinoderm microtubule-associated protein-like 1	EML1	28.2419	0.457727	0.298603	-0.130124	0.0858835	0.706597	0.552449	0.790521	0.45815	n.s.	n.s.	n.s.	n.s.	n.s.	n.s.	n.s.	n.s.
A0A3B3IUB1;Q13144;A0A3B3ISX3;A0A3B3ITG6;A0A3B3IUF2;A0A3B3ISM8;A0A3B3ITQ2;A0A3B3IS56;A0A3B3IRP4;A0A3B3ISS1;A0A3B3ISV1;A0A3B3IST9;A0A3B3ISI2;A0A3B3ITK8;C9JRD9;A0A3B3IT53;H7C2X0	A0A3B3IUB1;Q13144;A0A3B3ISX3;A0A3B3ITG6;A0A3B3IUF2;A0A3B3ISM8;A0A3B3ITQ2	Translation initiation factor eIF-2B subunit epsilon	EIF2B5	26.0569	0.0873394	-0.922073	-1.06316	-0.415366	0.150207	0.44267	0.593403	0.984829	n.s.	n.s.	n.s.	n.s.	n.s.	n.s.	n.s.	n.s.
A0A3F2YNY6;O75400-2;H7C2N3;H7BXZ7;O75400-5	A0A3F2YNY6;O75400-2	Pre-mRNA-processing factor 40 homolog A	PRPF40A	24.433	2.91038	1.12718	0.411275	1.12599	0.74317	0.519436	0.25995	0.0820668	n.s.	n.s.	n.s.	n.s.	n.s.	n.s.	n.s.	n.s.
A0A3F2YNY7;P08397;A0A3B3IRR1;P08397-2;F5H345;P08397-3;F5H0P4;P08397-4;F5GY90;F5H226;A0A3B3IU56;A0A1W2PNU5;A0A3B3IU34;A0A0G2JQQ7;F5H4X2;F5H4W5	A0A3F2YNY7;P08397;A0A3B3IRR1;P08397-2;F5H345;P08397-3;F5H0P4;P08397-4;F5GY90;F5H226	Porphobilinogen deaminase	HMBS	25.7832	0.728375	0.375674	-0.047455	-0.33947	0.962615	0.827641	0.658162	0.697619	n.s.	n.s.	n.s.	n.s.	n.s.	n.s.	n.s.	n.s.
A0AVT1;A0AVT1-2;H0Y8S8;A0AVT1-3;A0AVT1-4;H0Y9U5	A0AVT1;A0AVT1-2	Ubiquitin-like modifier-activating enzyme 6	UBA6	27.7625	0.325024	0.525795	-0.402944	-0.462127	0.208372	0.248201	0.130862	0.696711	n.s.	n.s.	n.s.	n.s.	n.s.	n.s.	n.s.	n.s.
A0PJW6;G5EA27	A0PJW6	Transmembrane protein 223	TMEM223	26.6575	-0.673773	-0.70047	-0.790479	-1.19285	0.149768	0.42804	0.0208507	0.614049	n.s.	AS_FvCON_F_do	n.s.	n.s.	F_do	n.s.	female	n.s.
A1A4S6;H0Y8W5	A1A4S6;H0Y8W5	Rho GTPase-activating protein 10	ARHGAP10	25.0008	0.320216	0.925332	0.976555	-0.66368	0.152806	0.394262	0.333247	0.905336	n.s.	n.s.	n.s.	n.s.	n.s.	n.s.	n.s.	n.s.
A1L020	A1L020	RNA-binding protein MEX3A	MEX3A	25.0289	0.762531	0.657064	1.00563	0.185989	0.269878	0.721287	0.856314	0.76068	n.s.	n.s.	n.s.	n.s.	n.s.	n.s.	n.s.	n.s.
A1L0T0;M0R026;M0QZX5;E9PJS0;M0R1B5;E9PL44;E9PNL1	A1L0T0;M0R026	Acetolactate synthase-like protein	ILVBL	31.4545	-0.00841596	-0.194539	-0.219017	-0.25993	0.696702	0.865105	0.592646	0.99575	n.s.	n.s.	n.s.	n.s.	n.s.	n.s.	n.s.	n.s.
A1L4K1;H0YLA8	A1L4K1	Fibronectin type III and SPRY domain-containing protein 2	FSD2	26.5209	0.673961	0.597689	0.756113	0.471463	0.139607	0.496411	0.36255	0.569594	n.s.	n.s.	n.s.	n.s.	n.s.	n.s.	n.s.	n.s.
A2RRP1;A2RRP1-2;H0Y5G7;H7C007;C9JCM7;H7BZR3;H7C1U4;H7BZU5	A2RRP1;A2RRP1-2;H0Y5G7	Neuroblastoma-amplified sequence	NBAS	26.8551	-1.16412	-0.180938	-0.858987	-1.26474	0.159315	0.907992	0.0284598	0.34319	n.s.	AS_FvCON_F_do	n.s.	n.s.	F_do	n.s.	female	n.s.
A3KMH1-3;A3KMH1;A3KMH1-2	A3KMH1-3;A3KMH1;A3KMH1-2	von Willebrand factor A domain-containing protein 8	VWA8	30.2796	-0.441794	-0.198311	-0.632892	-0.623805	0.0806725	0.82382	0.0779349	0.626336	n.s.	n.s.	n.s.	n.s.	n.s.	n.s.	n.s.	n.s.
A4FU69-3;A4FU69;A4FU69-4;A4FU69-2;H0Y843;A4FU69-5;K7EJC3;C9J1E6	A4FU69-3;A4FU69;A4FU69-4;A4FU69-2;H0Y843;A4FU69-5	EF-hand calcium-binding domain-containing protein 5	EFCAB5	25.2617	-0.444768	0.879948	0.391699	-1.09454	0.753744	0.647243	0.272041	0.911701	n.s.	n.s.	n.s.	n.s.	n.s.	n.s.	n.s.	n.s.
A4UGR9-2;A4UGR9;A4UGR9-8;A4UGR9-3;A0A0A0MQZ3	A4UGR9-2;A4UGR9;A4UGR9-8;A4UGR9-3	Xin actin-binding repeat-containing protein 2	XIRP2	33.1153	-1.44365	-0.22366	0.517667	-0.801109	0.205225	0.816869	0.036605	0.0277396	n.s.	AS_FvCON_F_do	n.s.	MR_FvCON_F_do	F_do	F_do	female	female
A5D6W6	A5D6W6	Fat storage-inducing transmembrane protein 1	FITM1	24.6166	-0.144618	-0.372245	-0.758365	-0.932443	0.355545	0.846179	0.215772	0.974184	n.s.	n.s.	n.s.	n.s.	n.s.	n.s.	n.s.	n.s.
A5YKK6;A5YKK6-2;A5YKK6-3;A5YKK6-4;H3BMZ2;H3BNB1;H3BVC9;H3BTH2;H3BR89;H3BMH0;H3BT18;H3BU44	A5YKK6;A5YKK6-2;A5YKK6-3;A5YKK6-4	CCR4-NOT transcription complex subunit 1	CNOT1	25.0511	-0.313211	1.38363	0.517422	-0.185491	0.669948	0.389984	0.876507	0.94865	n.s.	n.s.	n.s.	n.s.	n.s.	n.s.	n.s.	n.s.
A6NC48;Q10588;Q10588-2;H0Y984;H0Y9Q9;H0Y8G4	A6NC48;Q10588;Q10588-2;H0Y984;H0Y9Q9;H0Y8G4	ADP-ribosyl cyclase/cyclic ADP-ribose hydrolase 2	BST1	26.1837	0.337583	1.63748	-0.114576	-0.598201	0.928434	0.202057	0.52787	0.931288	n.s.	n.s.	n.s.	n.s.	n.s.	n.s.	n.s.	n.s.
H3BTL1;Q9GZQ8;A6NCE7	H3BTL1;Q9GZQ8;A6NCE7	Microtubule-associated proteins 1A/1B light chain 3B;Microtubule-associated proteins 1A/1B light chain 3 beta 2	MAP1LC3B	28.6053	-0.428176	-0.263996	-0.23962	-0.230101	0.554094	0.723634	0.54011	0.624865	n.s.	n.s.	n.s.	n.s.	n.s.	n.s.	n.s.	n.s.
A6NDG6;H3BV17	A6NDG6	Phosphoglycolate phosphatase	PGP	30.0277	-0.321415	0.0137722	0.0951565	0.0500856	0.737061	0.98305	0.850601	0.533064	n.s.	n.s.	n.s.	n.s.	n.s.	n.s.	n.s.	n.s.
A6NDU8;A0A0C4DGW6	A6NDU8;A0A0C4DGW6	UPF0600 protein C5orf51	C5orf51	24.5271	-0.187988	0.350774	0.089945	-0.122252	0.903197	0.775213	0.848725	0.939813	n.s.	n.s.	n.s.	n.s.	n.s.	n.s.	n.s.	n.s.
A6NEL0;P05114;A6NL93;F2Z2W6;F2Z2Y5;H7BXJ5	A6NEL0;P05114;A6NL93	Non-histone chromosomal protein HMG-14	HMGN1	24.033	1.09337	0.0830127	0.832628	0.439139	0.310403	0.967881	0.594075	0.536888	n.s.	n.s.	n.s.	n.s.	n.s.	n.s.	n.s.	n.s.
A6NFX8;Q9UKK9;A6NJU6;A6NCQ0;C9JYY9;H0YEY4	A6NFX8;Q9UKK9;A6NJU6;A6NCQ0	ADP-sugar pyrophosphatase	NUDT5	25.5365	0.279163	0.717991	0.67587	-0.44618	0.227311	0.418391	0.425332	0.890365	n.s.	n.s.	n.s.	n.s.	n.s.	n.s.	n.s.	n.s.
A6NGQ3;Q5VST9-6;Q5VST9;Q5VST9-2;Q5VST9-5;A0A1B0GTS2;H3BQA7;A0A0A0MRI8;REV__Q9NX65-3;REV__Q9NX65-2	A6NGQ3;Q5VST9-6;Q5VST9;Q5VST9-2;Q5VST9-5	Obscurin	OBSCN	34.2893	0.142606	-0.136677	0.104585	0.197133	0.569219	0.66121	0.209904	0.751528	n.s.	n.s.	n.s.	n.s.	n.s.	n.s.	n.s.	n.s.
A6NHL2-2;A6NHL2	A6NHL2-2;A6NHL2	Tubulin alpha chain-like 3	TUBAL3	27.6272	1.56482	1.00587	1.93089	2.70792	0.007295	0.402808	0.00016288	0.287089	AS_MvCON_M_up	AS_FvCON_F_up	n.s.	n.s.	shared_up	n.s.	both	n.s.
A6NHR9;A6NHR9-2;J3KTL8;A6NHR9-3;A0A2R8YCU7;A0A2R8YE92;J3KRK8;J3QSH1	A6NHR9;A6NHR9-2	Structural maintenance of chromosomes flexible hinge domain-containing protein 1	SMCHD1	24.0203	1.67479	-0.715179	-0.867393	0.389872	0.354387	0.678793	0.683057	0.345929	n.s.	n.s.	n.s.	n.s.	n.s.	n.s.	n.s.	n.s.
A6NHZ5	A6NHZ5	Leucine-rich repeat-containing protein 14B	LRRC14B	25.927	1.28802	0.483332	0.044575	0.145911	0.968195	0.778189	0.871355	0.427873	n.s.	n.s.	n.s.	n.s.	n.s.	n.s.	n.s.	n.s.
A6NLH6;Q9P003	A6NLH6;Q9P003	Protein cornichon homolog 4	CNIH4	27.0491	0.350068	0.0285883	-0.481101	-1.17985	0.479942	0.986518	0.0445609	0.871525	n.s.	AS_FvCON_F_do	n.s.	n.s.	F_do	n.s.	female	n.s.
A6NMH6;Q92599-2;Q92599-4;Q92599;A6NFQ9;F8W8I8;A0A087X142;Q92599-3;C9J4G8;C9JV02;A0A0A0MRP8	A6NMH6;Q92599-2;Q92599-4;Q92599;A6NFQ9;F8W8I8;A0A087X142;Q92599-3	Septin-8	SEPT8	27.8459	0.123505	0.0902637	0.310567	0.589131	0.395709	0.916836	0.0682593	0.933728	n.s.	n.s.	n.s.	n.s.	n.s.	n.s.	n.s.	n.s.
E9PJK1;E9PRJ8;H0YDL9;H0YDJ9;E9PIF1;A6NMH8;P60033;E9PM31;H0YEE2	E9PJK1;E9PRJ8;H0YDL9;H0YDJ9;E9PIF1;A6NMH8;P60033	Tetraspanin;CD81 antigen	CD81	28.3743	0.911113	0.788725	0.832234	0.0697431	0.0511404	0.209904	0.895724	0.295272	n.s.	n.s.	n.s.	n.s.	n.s.	n.s.	n.s.	n.s.
A6NMQ3;Q5T5H1;O43768-2;O43768;O43768-9;O43768-3;O43768-4;A0A1W2PRU0;O43768-6;O43768-5;O43768-7;O43768-8	A6NMQ3;Q5T5H1;O43768-2;O43768;O43768-9;O43768-3;O43768-4;A0A1W2PRU0;O43768-6;O43768-5;O43768-7;O43768-8	Alpha-endosulfine	ENSA	26.4926	1.08079	0.102919	1.64644	1.48459	0.00168655	0.939982	0.0047571	0.335544	AS_MvCON_M_up	AS_FvCON_F_up	n.s.	n.s.	shared_up	n.s.	both	n.s.
A6NMZ7;A6NMZ7-2;H0Y940;H0YA33	A6NMZ7;A6NMZ7-2	Collagen alpha-6(VI) chain	COL6A6	30.6649	3.27717	1.72843	-0.229343	2.27604	0.862385	0.232977	0.0170696	0.0452351	n.s.	AS_FvCON_F_up	n.s.	MR_FvCON_F_up	F_up	F_up	female	female
A6PVN5;Q15257-2;Q15257-3;Q15257;F6WIT2;Q15257-4;Q5T949;Q5T948;A6PVN9;Q68CR8;A6PVN6;A6PVN8;B7ZBQ0;C9IZ76;A6PVN7;H0Y6E5;B7ZBP9;B7ZBP7;B4DDQ6	A6PVN5;Q15257-2;Q15257-3;Q15257;F6WIT2;Q15257-4;Q5T949;Q5T948;A6PVN9;Q68CR8	Serine/threonine-protein phosphatase 2A activator	PTPA	29.5671	0.199197	0.0850334	-0.128792	-0.0223561	0.633127	0.885077	0.936643	0.760303	n.s.	n.s.	n.s.	n.s.	n.s.	n.s.	n.s.	n.s.
A8K878;P55145;H7C2D6	A8K878;P55145	Mesencephalic astrocyte-derived neurotrophic factor	MANF	26.9746	-0.875525	1.13471	0.979086	-0.951078	0.180634	0.285636	0.177114	0.620571	n.s.	n.s.	n.s.	n.s.	n.s.	n.s.	n.s.	n.s.
A8KAH6;Q16082;E9PN16	A8KAH6;Q16082	Heat shock protein beta-2	HSPB2-C11orf52	32.2897	0.028524	0.00741649	0.202025	0.152228	0.49849	0.992953	0.59195	0.98552	n.s.	n.s.	n.s.	n.s.	n.s.	n.s.	n.s.	n.s.
A8MTT3	A8MTT3	Protein CEBPZOS	CEBPZOS	23.4561	0.389128	-0.343781	0.130656	0.142462	0.848123	0.764099	0.81267	0.811457	n.s.	n.s.	n.s.	n.s.	n.s.	n.s.	n.s.	n.s.
A8MUA9;A8MU27;P55854;P55854-2	A8MUA9;A8MU27;P55854;P55854-2	Small ubiquitin-related modifier 3	SUMO3	28.4893	0.0311426	-0.379686	-0.320066	0.250145	0.636255	0.764099	0.688777	0.991718	n.s.	n.s.	n.s.	n.s.	n.s.	n.s.	n.s.	n.s.
P62308;A8MWD9;Q49AN9;F5H013;C9JVQ0	P62308;A8MWD9;Q49AN9;F5H013;C9JVQ0	Small nuclear ribonucleoprotein G;Putative small nuclear ribonucleoprotein G-like protein 15	SNRPG	27.0709	-0.200018	-0.0355078	-0.215986	-0.221579	0.652313	0.973939	0.605472	0.894388	n.s.	n.s.	n.s.	n.s.	n.s.	n.s.	n.s.	n.s.
A8MXP9;A0A0R4J2E8;P43243;D6REM6;D6R991;B3KM87;P43243-2;H0Y8T4;Q68E03;D6R8Z5;D6RCM3;D6REK4;D6RBI2;D6RBK5;D6RE02;D6RIA2;D6RB45;A0A1B0GX04;D6R9F3;D6RAM9;D6RAY2;D6RBS2	A8MXP9;A0A0R4J2E8;P43243;D6REM6;D6R991	Matrin-3	MATR3	30.5326	-0.0477197	0.217591	-0.153906	-0.509382	0.602417	0.658401	0.0346212	0.974184	n.s.	AS_FvCON_F_do	n.s.	n.s.	F_do	n.s.	female	n.s.
A8MXV4	A8MXV4	Nucleoside diphosphate-linked moiety X motif 19, mitochondrial	NUDT19	28.8726	-0.837194	-0.493989	-0.409279	-0.744414	0.326822	0.44267	0.0482532	0.273273	n.s.	AS_FvCON_F_do	n.s.	n.s.	F_do	n.s.	female	n.s.
A8MXZ9;Q14896;A0A0A0MQU5;Q14896-2;F5GZR4	A8MXZ9;Q14896;A0A0A0MQU5;Q14896-2;F5GZR4	Myosin-binding protein C, cardiac-type	MYBPC3	38.472	-0.0194835	-0.148873	-0.0733358	0.141741	0.690265	0.593338	0.355271	0.984441	n.s.	n.s.	n.s.	n.s.	n.s.	n.s.	n.s.	n.s.
B0I1T2;A0A3B3IU30;B0I1T2-4;B0I1T2-3;F8WEW9;B0I1T2-2;F8WAS7	B0I1T2;A0A3B3IU30;B0I1T2-4;B0I1T2-3;F8WEW9;B0I1T2-2	Unconventional myosin-Ig;Minor histocompatibility antigen HA-2	MYO1G	24.7393	-0.768743	-1.39016	-0.481923	0.789789	0.568397	0.173709	0.281752	0.692286	n.s.	n.s.	n.s.	n.s.	n.s.	n.s.	n.s.	n.s.
B0QY89;Q9Y262;Q9Y262-2;B0QY90;C9JHP4;C9K0Q7;H7C3A0;H0Y7E6	B0QY89;Q9Y262;Q9Y262-2;B0QY90	Eukaryotic translation initiation factor 3 subunit L	EIF3L	30.0766	-0.54044	-0.0518907	0.00802948	-0.71439	0.982257	0.923892	0.000252352	0.131572	n.s.	AS_FvCON_F_do	n.s.	n.s.	F_do	n.s.	female	n.s.
B0QYK0;Q01844-6;Q01844-3;Q01844;Q01844-5;A0A0D9SFL3;C9JGE3;Q01844-2;Q01844-4	B0QYK0;Q01844-6;Q01844-3;Q01844;Q01844-5;A0A0D9SFL3;C9JGE3;Q01844-2	RNA-binding protein EWS	EWSR1	27.3415	0.399884	-0.0619471	0.00473138	0.361725	0.994122	0.94554	0.336492	0.677193	n.s.	n.s.	n.s.	n.s.	n.s.	n.s.	n.s.	n.s.
B0QZ18;Q99829;A6PVH9;F2Z2V0;E7ENH5;Q5JX58;Q5JX59;Q5JX60;Q5JX44;Q5JX45;Q5JX56;Q5JX55;Q5JX61;Q5JX52;Q5JX54;Q5JX57;E7EV27;H0Y524;Q5JX53	B0QZ18;Q99829;A6PVH9;F2Z2V0;E7ENH5;Q5JX58;Q5JX59;Q5JX60;Q5JX44;Q5JX45;Q5JX56	Copine-1	CPNE1	28.5784	0.674879	0.201643	-0.657989	-0.205933	0.395759	0.913732	0.80232	0.731287	n.s.	n.s.	n.s.	n.s.	n.s.	n.s.	n.s.	n.s.
B0YIW2;P02656	B0YIW2;P02656	Apolipoprotein C-III	APOC3	28.3354	0.629179	1.40997	1.23622	1.67294	0.0874333	0.162574	0.0165776	0.767271	n.s.	AS_FvCON_F_up	n.s.	n.s.	F_up	n.s.	female	n.s.
B0YJ81;A6NP58;B0YJ81-2;J3KT94;J3KS69	B0YJ81	Very-long-chain (3R)-3-hydroxyacyl-CoA dehydratase 1	HACD1	26.8278	-0.285203	-0.203168	-0.156629	0.0537332	0.818042	0.880319	0.934004	0.883029	n.s.	n.s.	n.s.	n.s.	n.s.	n.s.	n.s.	n.s.
B1AKY9;P50993;H0Y7C1	B1AKY9;P50993;H0Y7C1	Sodium/potassium-transporting ATPase subunit alpha-2	ATP1A2	33.2569	0.403486	0.177432	0.0868553	0.277678	0.705795	0.613373	0.126168	0.268388	n.s.	n.s.	n.s.	n.s.	n.s.	n.s.	n.s.	n.s.
[truncated: 3,399 more rows]
