# Supplementary material for: Disease- and sex-specific differences in patients with heart valve disease: a proteome study
Source: Life Sci Alliance. 2023 Jan 10;6(3):e202201411. doi: 10.26508/lsa.202201411 (PMC9834574; doi:10.26508/lsa.202201411)
Supplement: Supplementary file 2 [file LSA-2022-01411_TableS2.xlsx]

## Sheet: ASandMRvCON_up
GO term enrichment results of proteins with a positive log2 fold change in AS vs CON and MR vs CON. Results were generated using gprofiler2 with false discovery rate set to 5%.
AvC = AS vs CON
MvC = MR vs CON
AS = aortic valve stenosis, MR = mitral valve regurgitation, CON = controls, up = positive log2 fold change in differential expression analysis, do = negative log2 fold change in differential expression analysis
BP = biological processes, CC = cellular compartment, MF = molecular function
term_id	source	term_name	AvC_up_p_value	MvC_up_p_value	term_size	AvC_up_intersection_size	MvC_up_intersection_size	source_order	parents	AvC_up_intersection	MvC_up_intersection	order	annotation
GO:0002455	GO:BP	humoral immune response mediated by circulating immunoglobulin	0.00560295346463193	0.000484038769942988	48	21	18	1126	GO:0006959, GO:0016064	C1QB,C1S,C8G,APCS,C4BPA,IGLV6-57,C8A,C6,C8B,C1QC,IGLV3-25,IGLL5,CFI,IGKV1-5,IGHV4-34,IGKV3-15,C3,C2,CLU,IGLC3,HPX	C1QB,C1S,IGLV3-25,C1QC,C4BPA,C8G,IGHV1-18,C2,APCS,IGLL5,SERPING1,C6,IGLC3,IGKV3-15,C8A,C3,HPX,C4B	11	other terms
GO:0002576	GO:BP	platelet degranulation	0.000101576989402022	1.2816744312754e-05	75	26	20	1246	GO:0045055	TIMP3,SERPINA4,ISLR,CLEC3B,CFD,AHSG,PROS1,APOA1,TMSB4X,KNG1,ACTN1,TF,HRG,APOH,A2M,FGA,PLG,CLU,ITIH4,FLNA,A1BG,SERPING1,SERPINF2,FGG,TTN,FGB	SERPINA4,TIMP3,ISLR,CLEC3B,CFD,AHSG,APOA1,SERPING1,HRG,A2M,KNG1,PLG,APOH,FLNA,ITIH4,A1BG,TF,FGA,FGB,FGG	5	other terms
GO:0002920	GO:BP	regulation of humoral immune response	7.90762548525282e-06	3.62146598680342e-06	51	26	20	1590	GO:0006959, GO:0050776	C1QB,C1S,C8G,C4BPA,IGLV6-57,CFHR1,PROS1,C8A,C6,C8B,C1QC,IGLV3-25,CFH,CFI,IGKV1-5,IGHV4-34,CFB,IGKV3-15,A2M,C3,C2,CLU,IGLC3,HPX,VTN,C4B	C1QB,C1S,IGLV3-25,C1QC,C4BPA,CFHR1,C8G,C2,SERPING1,C6,CFH,A2M,CPB2,IGLC3,IGKV3-15,C8A,C3,HPX,CFB,C4B	2	other terms
GO:0003418	GO:BP	growth plate cartilage chondrocyte differentiation	0.0411489097285803		8	7		2023	GO:0003413, GO:0003417	COL12A1,COL14A1,MATN2,ANXA6,COL6A2,COL6A1,COL6A3		36	ECM
GO:0006956	GO:BP	complement activation	4.29523966974315e-05	5.09303256439673e-06	63	29	23	2933	GO:0002252, GO:0002253, GO:0006959	C1QB,C1S,C8G,APCS,CFD,C4BPA,IGLV6-57,CFHR1,PROS1,C8A,C6,C8B,C1QC,IGLV3-25,CFH,IGLL5,CFI,IGKV1-5,IGHV4-34,CFB,IGKV3-15,A2M,C3,C2,CLU,IGLC3,VTN,KRT1,C4B	C1QB,C1S,IGLV3-25,CFD,C1QC,C4BPA,CFHR1,C8G,IGHV1-18,C2,APCS,IGLL5,SERPING1,C6,CFH,A2M,CPB2,IGLC3,IGKV3-15,C8A,C3,CFB,C4B	3	other terms
GO:0006957	GO:BP	complement activation, alternative pathway	0.000222572504250659	0.000657064526308442	11	8	6	2934	GO:0006956, GO:0045087	C8G,CFD,C8A,C8B,CFH,CFB,C3,C9	CFD,C8G,CFH,C8A,C3,CFB	3	other terms
GO:0006958	GO:BP	complement activation, classical pathway	0.00469054565525533	0.000587156839012409	45	20	17	2935	GO:0002455, GO:0006956	C1QB,C1S,C8G,APCS,C4BPA,IGLV6-57,C8A,C6,C8B,C1QC,IGLV3-25,IGLL5,CFI,IGKV1-5,IGHV4-34,IGKV3-15,C3,C2,CLU,IGLC3	C1QB,C1S,IGLV3-25,C1QC,C4BPA,C8G,IGHV1-18,C2,APCS,IGLL5,SERPING1,C6,IGLC3,IGKV3-15,C8A,C3,C4B	3	other terms
GO:0006959	GO:BP	humoral immune response		0.00582892992276031	96		28	2936	GO:0006955		PGLYRP2,C1QB,C1S,IGLV3-25,CFD,C1QC,C4BPA,CFHR1,C8G,IGHV1-18,C2,APCS,IGLL5,SERPING1,HRG,C6,CFH,A2M,CPB2,IGLC3,IGKV3-15,C8A,C3,HPX,CFB,C4B,FGA,FGB	3	other terms
GO:0007597	GO:BP	blood coagulation, intrinsic pathway	0.0206158555017735	0.0057863459221886	12	7	6	3503	GO:0072376, GO:0072378	KNG1,SERPINC1,APOH,A2M,F12,SERPING1,F2	SERPING1,A2M,KNG1,APOH,SERPINC1,F2	19	other terms
GO:0010873	GO:BP	positive regulation of cholesterol esterification	0.0174830622716667	0.00399508774914642	5	4	4	5047	GO:0010872, GO:0031325, GO:0034435, GO:0045940	APOA4,APOE,APOA2,APOA1	APOA4,APOE,APOA1,APOA2	14	other terms
GO:0010903	GO:BP	negative regulation of very-low-density lipoprotein particle remodeling	0.00562692626577196		3	3		5077	GO:0010901, GO:0034372, GO:0051129, GO:0051241	APOA2,APOC3,APOA1		18	other terms
GO:0010951	GO:BP	negative regulation of endopeptidase activity		0.0296034649869583	82		20	5123	GO:0010466, GO:0052548		SERPINA5,SERPINA4,TIMP3,SERPINA7,SERPIND1,COL28A1,ARRB1,AHSG,SERPING1,CST3,HRG,A2M,KNG1,PAPLN,C3,ITIH4,SERPINF1,C4B,AMBP,SERPINC1	31	other terms
GO:0015671	GO:BP	oxygen transport	0.0411489097285803	0.030248376702619	7	3	3	5409	GO:0015669, GO:0015893	HBG1,HBD,HBB	HBD,HBG1,HBB	32	other terms
GO:0015701	GO:BP	bicarbonate transport	0.0199253073615821	0.00465458009740158	11	3	3	5432	GO:0015711	CA3,SLC4A1,CA1	SLC4A1,CA3,CA1	15	other terms
GO:0030193	GO:BP	regulation of blood coagulation	0.00560295346463193	0.00578264191322893	35	17	12	7809	GO:0007596, GO:0032101, GO:0050818, GO:0061041, GO:1900046	SERPINE2,APOE,PROS1,KNG1,SERPINC1,HRG,APOH,FGA,PLG,F12,VTN,KRT1,SERPING1,SERPINF2,FGG,FGB,F2	APOE,SERPING1,HRG,KNG1,CPB2,PLG,APOH,FGA,SERPINC1,FGB,FGG,F2	6	other terms
GO:0030195	GO:BP	negative regulation of blood coagulation	0.000111987765895373	0.000678821470038059	26	16	11	7811	GO:0007596, GO:0030193, GO:0050819, GO:0061045, GO:1900047	SERPINE2,APOE,PROS1,KNG1,HRG,APOH,FGA,PLG,F12,VTN,KRT1,SERPING1,SERPINF2,FGG,FGB,F2	APOE,SERPING1,HRG,KNG1,CPB2,PLG,APOH,FGA,FGB,FGG,F2	6	other terms
GO:0030199	GO:BP	collagen fibril organization	2.56106991028792e-05		24	15		7813	GO:0030198, GO:0097435	FMOD,AEBP1,COMP,COL12A1,COL14A1,COL3A1,COL5A3,DPT,COL1A1,COL1A2,TNXB,COL2A1,COL5A1,LUM,COL5A2		6	ECM
GO:0030300	GO:BP	regulation of intestinal cholesterol absorption		0.0229986686913679	3		3	7865	GO:0030299, GO:0032374, GO:1904729		APOA4,APOA1,APOA2	28	other terms
GO:0030449	GO:BP	regulation of complement activation	2.24019174937167e-06	2.90112632069032e-06	50	25	19	7926	GO:0002697, GO:0002920, GO:0006956	C1QB,C1S,C8G,C4BPA,IGLV6-57,CFHR1,PROS1,C8A,C6,C8B,C1QC,IGLV3-25,CFH,CFI,IGKV1-5,IGHV4-34,CFB,IGKV3-15,A2M,C3,C2,CLU,IGLC3,VTN,C4B	C1QB,C1S,IGLV3-25,C1QC,C4BPA,CFHR1,C8G,C2,SERPING1,C6,CFH,A2M,CPB2,IGLC3,IGKV3-15,C8A,C3,CFB,C4B	1	other terms
GO:0031639	GO:BP	plasminogen activation	0.0245510892006814	0.0218181893221878	16	8	6	8486	GO:0031638	SERPINE2,CLEC3B,APOH,FGA,F12,SERPINF2,FGG,FGB	CLEC3B,CPB2,APOH,FGA,FGB,FGG	25	other terms
GO:0034371	GO:BP	chylomicron remodeling	4.29523966974315e-05	0.000180900461575921	8	6	5	9956	GO:0034370	APOB,APOA4,APOE,APOA2,APOC3,APOA1	APOB,APOA4,APOE,APOA1,APOA2	9	other terms
GO:0034372	GO:BP	very-low-density lipoprotein particle remodeling	0.00287752204737409		7	5		9957	GO:0034370	APOA4,APOE,APOA2,APOC3,APOA1		9	other terms
GO:0042730	GO:BP	fibrinolysis	4.98081347825147e-05	0.000170759209143502	16	12	9	12062	GO:0030195	PROS1,HRG,APOH,FGA,PLG,F12,KRT1,SERPING1,SERPINF2,FGG,FGB,F2	SERPING1,HRG,CPB2,PLG,APOH,FGA,FGB,FGG,F2	10	other terms
GO:0042744	GO:BP	hydrogen peroxide catabolic process	0.0123787803542062	0.0210040250883073	19	5	4	12072	GO:0017001, GO:0042737, GO:0042743, GO:0051187	HBG1,HBD,APOA4,HBB,SNCA	HBD,HBG1,APOA4,HBB	10	other terms
GO:0043062	GO:BP	extracellular structure organization	0.00560295346463193	0.0113746307829457	136	28	35	12275	GO:0016043	HAPLN1,FMOD,POSTN,AEBP1,COMP,ELN,COL12A1,FBLN1,COL14A1,COL4A6,COL3A1,COL5A3,BGN,ABI3BP,CCDC80,DPT,VCAN,EFEMP2,COL1A1,COL1A2,TTR,ST7,MFAP5,COL16A1,COL4A1,TNXB,COL2A1,FBLN2	ELN,COL14A1,POSTN,AEBP1,HAPLN1,COL12A1,COL28A1,FBLN1,ABI3BP,MYH11,TTR,CMA1,CST3,A2M,CPB2,BGN,PLG,FBLN2,DPT,FGA,TNXB,FGB,VCAN,FGG,FBN1,FBLN5,EMILIN1,MFAP5,COL6A2,COL6A1,DCN,COL18A1,TGFBI,COL6A3,COL4A2	17	ECM
GO:0048251	GO:BP	elastic fiber assembly		0.0218181893221878	8		4	14938	GO:0085029, GO:0097435		MYH11,TNXB,FBLN5,EMILIN1	26	ECM
GO:0048821	GO:BP	erythrocyte development		0.0383015349664448	9		3	15413	GO:0030218, GO:0061515		SLC4A1,EPB42,BPGM	33	other terms
GO:0050818	GO:BP	regulation of coagulation	0.00190712025639903		37	19		15675	GO:0050817, GO:0051239	SERPINE2,APOE,PROS1,ANXA6,KNG1,SERPINC1,HRG,APOH,FGA,PLG,F12,VTN,KRT1,SERPING1,SERPINF2,FGG,ANXA4,FGB,F2		8	other terms
GO:0050819	GO:BP	negative regulation of coagulation	4.29523966974315e-05		28	18		15676	GO:0050817, GO:0050818, GO:0051241	SERPINE2,APOE,PROS1,ANXA6,KNG1,HRG,APOH,FGA,PLG,F12,VTN,KRT1,SERPING1,SERPINF2,FGG,ANXA4,FGB,F2		8	other terms
GO:0051764	GO:BP	actin crosslink formation	0.0199253073615821		5	5		16415	GO:0007015	TNNT2,ACTN1,MARCKS,FLNA,DPYSL3		24	SKEL
GO:0051917	GO:BP	regulation of fibrinolysis	0.0274325830992117		9	6		16518	GO:0030193, GO:0042730	HRG,APOH,PLG,F12,SERPINF2,F2		12	other terms
GO:0051918	GO:BP	negative regulation of fibrinolysis	0.0374551291072446	0.00370816257947096	7	5	5	16519	GO:0030194, GO:0032103, GO:0042730, GO:0048519, GO:0051917	HRG,APOH,PLG,SERPINF2,F2	HRG,CPB2,PLG,APOH,F2	12	other terms
GO:0061045	GO:BP	negative regulation of wound healing	0.00469054565525533	0.00465458009740158	33	17	12	18144	GO:0032102, GO:0042060, GO:0061041, GO:1903035	SERPINE2,APCS,APOE,PROS1,KNG1,HRG,APOH,FGA,PLG,F12,VTN,KRT1,SERPING1,SERPINF2,FGG,FGB,F2	APOE,APCS,SERPING1,HRG,KNG1,CPB2,PLG,APOH,FGA,FGB,FGG,F2	16	other terms
GO:0072376	GO:BP	protein activation cascade		1.2816744312754e-05	19		10	20594	GO:0019538, GO:0050896		FBLN1,SERPING1,A2M,KNG1,APOH,FGA,SERPINC1,FGB,FGG,F2	4	other terms
GO:0072378	GO:BP	blood coagulation, fibrin clot formation	0.000297052038713712		19	11		20596	GO:0007596, GO:0072376	FBLN1,KNG1,SERPINC1,APOH,A2M,FGA,F12,SERPING1,FGG,FGB,F2		4	other terms
GO:0090171	GO:BP	chondrocyte morphogenesis	0.0421620730600625	0.0113746307829457	7	6	6	21644	GO:0000904, GO:0002063	COL12A1,COL14A1,MATN2,COL6A2,COL6A1,COL6A3	COL14A1,MATN2,COL12A1,COL6A2,COL6A1,COL6A3	20	ECM
GO:1900046	GO:BP	regulation of hemostasis	0.00245390948038796		36	18		23604	GO:0007599, GO:0050789, GO:0050878	COMP,SERPINE2,APOE,PROS1,KNG1,SERPINC1,HRG,APOH,FGA,PLG,F12,VTN,KRT1,SERPING1,SERPINF2,FGG,FGB,F2		7	other terms
GO:1900047	GO:BP	negative regulation of hemostasis	4.29523966974315e-05		27	17		23605	GO:0007599, GO:0048519, GO:1900046	COMP,SERPINE2,APOE,PROS1,KNG1,HRG,APOH,FGA,PLG,F12,VTN,KRT1,SERPING1,SERPINF2,FGG,FGB,F2		7	other terms
GO:1904478	GO:BP	regulation of intestinal absorption	0.0257483392046971	0.00399508774914642	4	4	4	27693	GO:0044058, GO:0050892, GO:0051049	APOA4,APOA2,APOA1,EPB41	APOA4,EPB41,APOA1,APOA2	13	other terms
GO:0001527	GO:CC	microfibril		0.0381151067592106	5		3	175	GO:0031012, GO:0099512		LTBP1,FBN1,MFAP5	34	SKEL
GO:0005577	GO:CC	fibrinogen complex	0.0211520142162262	0.024083286079923	6	4	3	257	GO:0005615, GO:0032991	FGA,SERPINF2,FGG,FGB	FGA,FGB,FGG	9	other terms
GO:0005579	GO:CC	membrane attack complex	0.000664268412415504	0.00947341938464923	7	4	3	258	GO:0005887, GO:0046930, GO:0098797	C8G,C8A,C6,C8B	C8G,C6,C8A	9	other terms
GO:0005581	GO:CC	collagen trimer	4.49610484345718e-05	0.00564082892599001	34	22	14	260	GO:0032991	COL12A1,COL14A1,COL4A6,C1QB,COL3A1,COL5A3,COL1A1,COL1A2,C1QC,COL16A1,COL4A1,COL2A1,COL5A1,LUM,COL6A2,COL5A2,DCN,COL6A1,EMILIN1,COL6A3,COL18A1,COL4A2	COL14A1,C1QB,COL6A6,C1QC,COL12A1,COL28A1,EMILIN1,COL6A2,COL6A1,DCN,COL18A1,COL6A3,COL4A2,ADIPOQ	9	ECM
GO:0005588	GO:CC	collagen type V trimer	0.00266365152642675		3	3		267	GO:0005583	COL5A3,COL5A1,COL5A2		9	ECM
GO:0005589	GO:CC	collagen type VI trimer	0.00519186386875855		3	3		268	GO:0005581, GO:0098647	DCN,COL6A1,COL6A3		9	ECM
GO:0005593	GO:CC	FACIT collagen trimer	0.000664268412415504		4	3		272	GO:0005581	COL12A1,COL14A1,COL5A3		9	ECM
GO:0005604	GO:CC	basement membrane	0.00942358645943064		44	17		283	GO:0062023	TIMP3,ANG,FBLN1,COL4A6,MATN2,CCDC80,EFEMP2,COL4A1,COL2A1,THBS4,COL5A1,SERPINF1,VTN,FBN1,COL18A1,COL4A2,TGFBI		22	ECM
GO:0005788	GO:CC	endoplasmic reticulum lumen	0.00184114355679873	0.0108592759791221	135	40	28	449	GO:0005783, GO:0070013	APOB,COL12A1,COL14A1,APOA4,COL4A6,COL3A1,COL5A3,LTBP1,APOE,APOA2,VCAN,COL1A1,COL1A2,AHSG,SERPIND1,COL16A1,COL4A1,APOA1,COL2A1,COL5A1,TRDN,KNG1,SERPINC1,TF,FGA,COL6A2,C3,COL5A2,CLU,VTN,MFGE8,COL6A1,COL6A3,FBN1,FGG,COL18A1,TGOLN2,CP,COL4A2,F2	APOB,COL14A1,APOA4,LTBP1,COL12A1,SERPIND1,COL28A1,APOE,AHSG,APOA1,APOA2,CST3,KNG1,C3,TF,FGA,SERPINC1,VCAN,FGG,FBN1,CP,F2,WFS1,COL6A2,COL6A1,COL18A1,COL6A3,COL4A2	14	PROT
GO:0005862	GO:CC	muscle thin filament tropomyosin	0.0229697831580657		4	3		513	GO:0005865, GO:0032991	TPM1,TPM3,TPM4		30	MUSC
GO:0008091	GO:CC	spectrin		0.00317244871568622	6		5	622	GO:0030864, GO:0032991		SPTA1,EPB41L2,SPTB,SPTBN1,SPTAN1	17	SKEL
GO:0014731	GO:CC	spectrin-associated cytoskeleton	0.0431077512269241	0.01955984174085	8	3	4	847	GO:0005856	SPTA1,SPTBN2,EPB41	SPTA1,EPB41,SPTB,SPTBN1	20	SKEL
GO:0016460	GO:CC	myosin II complex		0.0457788436070523	19		4	890	GO:0016459		MYH2,MYH11,MYH10,LIMCH1	36	MUSC
GO:0030016	GO:CC	myofibril		0.0305068415053195	151		26	1041	GO:0043292		SLC4A1,MYH2,TNNI1,SLC2A1,PDLIM7,TNNT2,CSRP1,FLNA,TPM3,TPM1,GCOM1,ACTN1,PDLIM3,SYNPO2L,ACTN4,SVIL,SYNPO2,SYNM,SYNPO,SORBS2,AHNAK,PPP1R12B,PLEC,DMD,SPTBN1,PGM5	5	MUSC
GO:0030016	GO:CC	myofibril		0.0305068415053195	151		26	1041	GO:0043292		SLC4A1,MYH2,TNNI1,SLC2A1,PDLIM7,TNNT2,CSRP1,FLNA,TPM3,TPM1,GCOM1,ACTN1,PDLIM3,SYNPO2L,ACTN4,SVIL,SYNPO2,SYNM,SYNPO,SORBS2,AHNAK,PPP1R12B,PLEC,DMD,SPTBN1,PGM5	5	MUSC
GO:0030055	GO:CC	cell-substrate junction		0.0438689086874462	277		42	1046	GO:0070161		PDLIM7,CSRP1,TNS3,HMGA1,REXO2,FLNA,AKAP12,SNTB2,CAT,TGM2,EPB41L2,TNS1,ACTN1,LPP,VIM,LASP1,ACTN4,ADD1,SVIL,CTTN,CNN3,SYNPO2,FLOT2,ANXA1,PACSIN2,LMO7,SORBS1,SORBS2,TLN1,GSN,AHNAK,TLN2,PLEC,DMD,FLOT1,PCBP2,PGM5,YWHAB,CAPN1,HNRNPK,ANXA6,PDCD6IP	5	SKEL
GO:0030863	GO:CC	cortical cytoskeleton		0.01955984174085	56		17	1168	GO:0005856, GO:0005938		SLC4A1,EPB42,SPTA1,SLC2A1,EPB41,FLNA,EPB41L2,UTRN,LASP1,ACTN4,CTTN,FLOT2,GSN,SPTB,FLOT1,SPTBN1,SPTAN1	29	SKEL
GO:0031012	GO:CC	extracellular matrix	6.88768402045177e-17	7.35338122693311e-14	215	97	69	1218	GO:0005576, GO:0110165	HAPLN1,FMOD,POSTN,LTBP2,AEBP1,COMP,ELN,TIMP3,COL12A1,ANG,FBLN1,COL14A1,APOA4,SERPINA5,COL4A6,C1QB,HAPLN3,COL3A1,COL5A3,SERPINE2,ASPN,CLEC3B,BGN,ABI3BP,MATN2,LTBP1,APCS,CCDC80,DPT,PCOLCE,PODN,APOE,VCAN,MGP,EFEMP2,CILP,PRELP,COL1A1,COL1A2,AHSG,MXRA7,APOC3,MFAP5,C1QC,COL16A1,COL4A1,APOA1,TNXB,COL2A1,FBLN2,IGFALS,THBS4,COL5A1,ANXA6,KNG1,SERPINC1,HRG,SOD3,APOH,A2M,SERPINF1,AMBP,FGA,PLG,LUM,F12,COL6A2,…	ELN,SERPINA5,COL14A1,C1QB,TIMP3,APOA4,MATN2,POSTN,CLEC3B,COL6A6,AEBP1,LTBP1,IGFALS,C1QC,HAPLN1,PODN,PCOLCE,COL12A1,COL28A1,ASPN,FBLN1,ANG,ABI3BP,APOE,AHSG,APOA1,CMA1,APCS,SERPING1,CST3,HRG,A2M,KNG1,BGN,PLG,CPA3,APOH,FBLN2,DPT,AZGP1,ITIH4,SERPINF1,OGN,PRELP,HPX,A1BG,AMBP,FGA,TNXB,SERPINC1,FGB,VCAN,FGG,FBN1,F2,FBLN5,EMILIN1,MFAP5,SOD3,COL6A2,COL6A1,DCN,TGM2,COL18A1,ANXA4,TGFBI,COL6A3,S100A4,COL4A2	3	ECM
GO:0031089	GO:CC	platelet dense granule lumen	0.00719689338262418	0.00122045584897682	11	3	5	1235	GO:0034774, GO:0042827	TIMP3,SERPINA4,CLEC3B	SERPINA4,TIMP3,CLEC3B,APOH,ITIH4	11	other terms
GO:0031091	GO:CC	platelet alpha granule	0.000103858422313003	0.000730384098813346	50	20	13	1237	GO:0030141	SERPINA5,ISLR,SERPINE2,SNCA,CFD,AHSG,PROS1,TMSB4X,KNG1,ACTN1,HRG,A2M,FGA,PLG,CLU,A1BG,SERPING1,SERPINF2,FGG,FGB	SERPINA5,ISLR,CFD,AHSG,SERPING1,HRG,A2M,KNG1,PLG,A1BG,FGA,FGB,FGG	11	other terms
GO:0031093	GO:CC	platelet alpha granule lumen	8.31184492390332e-05	0.000248145343817227	40	17	14	1239	GO:0031091, GO:0034774	ISLR,CFD,AHSG,PROS1,TMSB4X,KNG1,ACTN1,HRG,A2M,FGA,PLG,CLU,A1BG,SERPING1,SERPINF2,FGG,FGB	ISLR,CFD,AHSG,SERPING1,HRG,A2M,KNG1,PLG,A1BG,FGA,FGB,FGG,ACTN1,ACTN4	11	other terms
GO:0031838	GO:CC	haptoglobin-hemoglobin complex	0.00266365152642675	0.00317244871568622	6	3	3	1435	GO:0032991	HBG1,HBD,HBB	HBD,HBG1,HBB	16	other terms
GO:0031983	GO:CC	vesicle lumen		0.0278715298408723	198		22	1474	GO:0031982, GO:0043233		APOB,SERPINA4,TIMP3,ISLR,CLEC3B,CFD,AHSG,APOA1,TTR,SERPING1,HRG,A2M,KNG1,PLG,APOH,C3,ITIH4,A1BG,TF,FGA,FGB,FGG	32	PROT
GO:0032432	GO:CC	actin filament bundle	0.000138949011373615		53	22		1548	GO:0015629, GO:0110165	SORBS1,PDLIM4,SYNPO,MYH10,TPM1,TPM3,ACTN1,TRIP6,MARCKS,PDLIM3,LPP,TPM4,LIMCH1,SYNPO2,FSCN1,ZYX,PDLIM1,PDLIM5,ABLIM1,SEPT7,PGM5,NEBL		13	SKEL
GO:0034363	GO:CC	intermediate-density lipoprotein particle	0.000510731395659932	0.00317244871568622	6	4	3	1724	GO:0034385	APOB,APOE,APOC3,APOA1	APOB,APOE,APOA1	8	other terms
GO:0034364	GO:CC	high-density lipoprotein particle	0.000142043509921248	4.10503819619024e-05	18	9	8	1725	GO:0034358	APOB,APOA4,APOE,APOA2,APOC3,APOA1,PON1,APOH,CLU	APOB,APOA4,PON1,APOE,APOA1,APOA2,HPR,APOH	8	other terms
GO:0034365	GO:CC	discoidal high-density lipoprotein particle	0.0395582420166515	0.0149561365432382	3	2	2	1726	GO:0034364	APOE,APOA1	APOE,APOA1	8	other terms
GO:0034366	GO:CC	spherical high-density lipoprotein particle	0.000927128452167236	0.000919152541057901	9	5	4	1727	GO:0034364	APOA2,APOC3,APOA1,PON1,CLU	PON1,APOA1,APOA2,HPR	8	other terms
GO:0034774	GO:CC	secretory granule lumen		0.0438689086874462	195		21	1822	GO:0030141, GO:0060205		SERPINA4,TIMP3,ISLR,CLEC3B,CFD,AHSG,APOA1,TTR,SERPING1,HRG,A2M,KNG1,PLG,APOH,C3,ITIH4,A1BG,TF,FGA,FGB,FGG	35	other terms
GO:0042383	GO:CC	sarcolemma		0.0240535481960279	73		18	2046	GO:0005886		SLC2A1,BGN,COL6A2,SGCE,COL6A1,SLC27A6,UTRN,COL6A3,ANXA1,SYNM,SSPN,MLIP,AHNAK,PLEC,DMD,DTNA,FLOT1,PGM5	31	MUSC
GO:0042627	GO:CC	chylomicron	6.37760063800233e-05	9.00674408533806e-05	10	7	6	2080	GO:0034358	APOB,APOA4,APOE,APOA2,APOC3,APOA1,APOH	APOB,APOA4,APOE,APOA1,APOA2,APOH	10	other terms
GO:0042641	GO:CC	actomyosin	0.000510731395659932	0.00554595072039699	57	22	15	2082	GO:0015629, GO:0110165	SORBS1,PDLIM4,SYNPO,MYH10,TPM1,TPM3,ACTN1,TRIP6,PDLIM3,LPP,TPM4,LIMCH1,SYNPO2,FSCN1,ZYX,PDLIM1,PDLIM5,ABLIM1,SEPT7,PGM5,NEBL,WDR1	PDLIM7,MYH10,LIMCH1,TPM3,TPM1,ACTN1,LPP,PDLIM3,ACTN4,SYNPO2,SYNPO,SORBS1,MYH14,PGM5,PDCD6IP	10	MUSC
GO:0043034	GO:CC	costamere		0.0144978668131255	16		6	2119	GO:0030016, GO:0110165		SVIL,SYNM,AHNAK,PLEC,DMD,PGM5	27	SKEL
GO:0043292	GO:CC	contractile fiber	0.0403997087808075	0.01955984174085	158	38	28	2172	GO:0005737, GO:0043232, GO:0099512	SLC4A1,TNNI1,SORBS2,PDLIM4,SYNPO,SLC2A1,TNNT2,TPM1,MYH13,TPM3,CSRP1,CEFIP,ACTN1,MYH11,SCO2,CALD1,FLNA,PDLIM3,SYNPO2L,SVIL,MYL6B,TTN,TPM4,SYNM,SYNPO2,MYH3,HRC,VCL,CSRP3,GCOM1,MYPN,PDLIM1,PPP1R12B,PLEC,PDLIM5,PGM5,NEBL,DES	SLC4A1,MYH2,TNNI1,SLC2A1,PDLIM7,MYH11,CST3,TNNT2,CSRP1,FLNA,TPM3,TPM1,GCOM1,ACTN1,PDLIM3,SYNPO2L,ACTN4,SVIL,SYNPO2,SYNM,SYNPO,SORBS2,AHNAK,PPP1R12B,PLEC,DMD,SPTBN1,PGM5	28	MUSC
GO:0043292	GO:CC	contractile fiber	0.0403997087808075	0.01955984174085	158	38	28	2172	GO:0005737, GO:0043232, GO:0099512	SLC4A1,TNNI1,SORBS2,PDLIM4,SYNPO,SLC2A1,TNNT2,TPM1,MYH13,TPM3,CSRP1,CEFIP,ACTN1,MYH11,SCO2,CALD1,FLNA,PDLIM3,SYNPO2L,SVIL,MYL6B,TTN,TPM4,SYNM,SYNPO2,MYH3,HRC,VCL,CSRP3,GCOM1,MYPN,PDLIM1,PPP1R12B,PLEC,PDLIM5,PGM5,NEBL,DES	SLC4A1,MYH2,TNNI1,SLC2A1,PDLIM7,MYH11,CST3,TNNT2,CSRP1,FLNA,TPM3,TPM1,GCOM1,ACTN1,PDLIM3,SYNPO2L,ACTN4,SVIL,SYNPO2,SYNM,SYNPO,SORBS2,AHNAK,PPP1R12B,PLEC,DMD,SPTBN1,PGM5	28	MUSC
GO:0044217	GO:CC	other organism part	0.0347330150412572		3	3		2299	GO:0005575	PLG,C4B,C9		33	other terms
GO:0044307	GO:CC	dendritic branch	0.0239516292790421		3	2		2339	GO:0030425	AKAP9,MAP1A		23	SKEL
GO:0062023	GO:CC	collagen-containing extracellular matrix	1.32367930100163e-24	8.60669359862433e-20	207	95	68	2710	GO:0031012	HAPLN1,FMOD,POSTN,LTBP2,AEBP1,COMP,ELN,TIMP3,COL12A1,ANG,FBLN1,COL14A1,APOA4,SERPINA5,COL4A6,C1QB,COL3A1,COL5A3,SERPINE2,ASPN,CLEC3B,BGN,ABI3BP,MATN2,LTBP1,APCS,CCDC80,DPT,PCOLCE,PODN,APOE,VCAN,MGP,EFEMP2,CILP,PRELP,COL1A1,COL1A2,AHSG,MXRA7,APOC3,MFAP5,C1QC,COL16A1,COL4A1,APOA1,TNXB,COL2A1,FBLN2,THBS4,COL5A1,ANXA6,KNG1,SERPINC1,HRG,SOD3,APOH,A2M,SERPINF1,AMBP,FGA,PLG,LUM,F12,COL6A2,COL5A2,CLU,HPX…	ELN,SERPINA5,COL14A1,C1QB,TIMP3,APOA4,MATN2,POSTN,CLEC3B,COL6A6,AEBP1,LTBP1,C1QC,HAPLN1,PODN,PCOLCE,COL12A1,COL28A1,ASPN,FBLN1,ANG,ABI3BP,APOE,AHSG,APOA1,CMA1,APCS,SERPING1,CST3,HRG,A2M,KNG1,BGN,PLG,CPA3,APOH,FBLN2,DPT,AZGP1,ITIH4,SERPINF1,OGN,PRELP,HPX,A1BG,AMBP,FGA,TNXB,SERPINC1,FGB,VCAN,FGG,FBN1,F2,FBLN5,EMILIN1,MFAP5,SOD3,COL6A2,COL6A1,DCN,TGM2,COL18A1,ANXA4,TGFBI,COL6A3,S100A4,COL4A2	2	ECM
GO:0071682	GO:CC	endocytic vesicle lumen	0.0381593412301531	0.00539122837560524	15	5	5	3114	GO:0030139, GO:0070013	APOB,HBB,APOE,APOA1,HPX	APOB,HBB,APOE,APOA1,HPX	18	other terms
GO:0071953	GO:CC	elastic fiber	0.00249413386189992	0.00507597271308876	4	2	3	3161	GO:0031012, GO:0099512	ELN,FBLN1	ELN,FBLN1,FBLN5	15	ECM
GO:0072562	GO:CC	blood microparticle	5.73314799513503e-24	1.72913533132368e-29	98	54	45	3182	GO:0005615, GO:0110165	SLC4A1,HBD,AFM,APOA4,C1QB,HBB,GRIPAP1,C1S,C8G,APCS,HSPA2,APOE,APOA2,C4BPA,AHSG,CFHR1,PROS1,C8A,SLC2A1,C1QC,IGLV3-25,APOA1,CFH,IGKV1-5,PON1,CFB,IGKV3-15,KNG1,SERPINC1,TF,HRG,A2M,AMBP,FGA,PLG,C3,CLU,IGLC3,HPX,VTN,ITIH4,KRT1,GC,C4B,C9,A1BG,SERPING1,SERPINF2,FGG,CP,FGB,F2,ITIH1,ITIH2	SLC4A1,HBD,C1QB,C1S,AFM,APOA4,IGLV3-25,SLC2A1,HBB,C1QC,C4BPA,PON1,CFHR1,C8G,APOE,AHSG,APOA1,APCS,SERPING1,APOA2,HRG,CFH,HPR,A2M,KNG1,IGLC3,IGKV3-15,PLG,C8A,C3,ITIH4,HPX,CFB,GC,A1BG,C4B,TF,AMBP,FGA,SERPINC1,FGB,HSPA2,FGG,CP,F2	1	other terms
GO:0090665	GO:CC	glycoprotein complex		0.0144978668131255	14		6	3248	GO:0032991		SNTB2,SGCE,UTRN,SSPN,DMD,PGM5	26	SKEL
GO:0097517	GO:CC	contractile actin filament bundle	0.000103858422313003	0.00317244871568622	50	21	14	3422	GO:0032432	SORBS1,PDLIM4,SYNPO,MYH10,TPM1,TPM3,ACTN1,TRIP6,PDLIM3,LPP,TPM4,LIMCH1,SYNPO2,FSCN1,ZYX,PDLIM1,PDLIM5,ABLIM1,SEPT7,PGM5,NEBL	PDLIM7,MYH10,LIMCH1,TPM3,TPM1,ACTN1,LPP,PDLIM3,ACTN4,SYNPO2,SYNPO,SORBS1,MYH14,PGM5	12	MUSC
GO:0098643	GO:CC	banded collagen fibril	1.49803386886736e-06		8	8		3625	GO:0098644, GO:0099512	COL3A1,COL5A3,COL1A1,COL1A2,COL2A1,COL5A1,LUM,COL5A2		4	ECM
GO:0098644	GO:CC	complex of collagen trimers	1.49803386886736e-06		12	10		3626	GO:0062023, GO:0099080	COL4A6,COL3A1,COL5A3,COL1A1,COL1A2,COL4A1,COL2A1,COL5A1,LUM,COL5A2		4	ECM
GO:0098647	GO:CC	collagen beaded filament		0.00317244871568622	3		3	3629	GO:0099512		COL6A1,DCN,COL6A3	4	ECM
GO:0001848	GO:MF	complement binding		0.0147616552700116	14		5	348	GO:0005515		C8G,APCS,C8A,CFB,C4B	16	other terms
GO:0003779	GO:MF	actin binding		0.0349764564668709	211		44	485	GO:0008092		MYH2,TNNI1,SPTA1,PDLIM7,EPB41,MAP1A,ANG,MYH11,TAGLN,TNNT2,MYH10,FLNA,GC,LIMCH1,SNTB2,TPM3,TPM1,ADD3,EPB41L2,TNS1,UTRN,ACTN1,S100A4,PDLIM3,SYNPO2L,LASP1,ACTN4,ADD1,SVIL,CTTN,CNN3,SYNPO2,SYNPO,SORBS1,MYH14,TLN1,GSN,TLN2,PLEC,DMD,SPTB,SPTBN1,MYO1C,SPTAN1	24	MUSC
GO:0004064	GO:MF	arylesterase activity		0.0252578776317648	5		3	740	GO:0052689		CA1,PON1,CA2	18	other terms
GO:0004089	GO:MF	carbonate dehydratase activity	0.0230505801393769	0.00718819415393713	4	2	2	765	GO:0016836	CA3,CA1	CA3,CA1	15	other terms
GO:0004857	GO:MF	enzyme inhibitor activity		0.0441107878548213	132		24	1436	GO:0030234		SERPINA5,SERPINA4,TIMP3,SERPINA7,SERPIND1,COL28A1,ARRB1,AHSG,APOA1,SERPING1,APOA2,CST3,HRG,A2M,KNG1,PAPLN,PPP1R37,C3,ITIH4,SERPINF1,C4B,AMBP,PLN,SERPINC1	7	ECM
GO:0004866	GO:MF	endopeptidase inhibitor activity		0.000295774903383213	60		20	1444	GO:0030414, GO:0061135		SERPINA5,SERPINA4,TIMP3,SERPINA7,SERPIND1,COL28A1,ARRB1,AHSG,SERPING1,CST3,HRG,A2M,KNG1,PAPLN,C3,ITIH4,SERPINF1,C4B,AMBP,SERPINC1	7	ECM
GO:0004867	GO:MF	serine-type endopeptidase inhibitor activity	0.0415191915788044	0.00105250640319139	33	16	13	1445	GO:0004866	SERPINA4,SERPINA5,SERPINE2,SERPINA7,SERPIND1,SERPINC1,HRG,A2M,SERPINF1,AMBP,ITIH4,COL6A3,SERPING1,SERPINF2,ITIH1,ITIH2	SERPINA5,SERPINA4,SERPINA7,SERPIND1,COL28A1,SERPING1,HRG,A2M,PAPLN,ITIH4,SERPINF1,AMBP,SERPINC1	7	ECM
GO:0005198	GO:MF	structural molecule activity	1.28911754289211e-05	0.0147616552700116	370	35	53	1721	GO:0003674	HAPLN1,FMOD,POSTN,LTBP2,AEBP1,COMP,ELN,COL12A1,FBLN1,SORBS2,COL14A1,COL4A6,EPB42,TUBAL3,COL3A1,COL5A3,ASPN,BGN,ABI3BP,MATN2,LTBP1,KRT18,DPT,PCOLCE,PODN,SPTA1,APOE,HMGA1,VCAN,MGP,EFEMP2,CILP,PRELP,COL1A1,COL1A2	ELN,EPB42,SPTA1,COL14A1,MATN2,POSTN,COL6A6,AEBP1,LTBP1,HAPLN1,PODN,PCOLCE,COL12A1,EPB41,MAP1A,COL28A1,ASPN,FBLN1,ABI3BP,APOE,MYH11,BGN,CSRP1,HMGA1,FBLN2,DPT,OGN,PRELP,FGA,TNXB,FGB,VCAN,FGG,FBN1,FBLN5,EMILIN1,MFAP5,SNTB2,TPM1,COL6A2,COL6A1,ADD3,DCN,EPB41L2,COL18A1,TGFBI,ACTN1,COL6A3,PDLIM3,COL4A2,VIM,ADD1,ADIPOQ	1	ECM
GO:0005200	GO:MF	structural constituent of cytoskeleton		0.0126727318621695	54		17	1723	GO:0005198		EPB42,SPTA1,EPB41,TPM1,ADD3,VIM,ADD1,SYNM,DSP,SORBS2,TLN1,TLN2,PLEC,DMD,SPTB,SPTBN1,SPTAN1	1	SKEL
GO:0005201	GO:MF	extracellular matrix structural constituent	1.18453133791105e-19	1.24179563696924e-12	92	53	37	1724	GO:0005198	HAPLN1,FMOD,POSTN,LTBP2,AEBP1,COMP,ELN,COL12A1,FBLN1,COL14A1,COL4A6,COL3A1,COL5A3,ASPN,BGN,ABI3BP,MATN2,LTBP1,DPT,PCOLCE,PODN,VCAN,MGP,EFEMP2,CILP,PRELP,COL1A1,COL1A2,MFAP5,COL16A1,COL4A1,TNXB,COL2A1,FBLN2,COL5A1,FGA,LUM,COL6A2,COL5A2,VTN,OGN,MFGE8,EFEMP1,DCN,COL6A1,EMILIN1,COL6A3,FBN1,FGG,COL18A1,FGB,COL4A2,TGFBI	ELN,COL14A1,MATN2,POSTN,COL6A6,AEBP1,LTBP1,HAPLN1,PODN,PCOLCE,COL12A1,COL28A1,ASPN,FBLN1,ABI3BP,BGN,FBLN2,DPT,OGN,PRELP,FGA,TNXB,FGB,VCAN,FGG,FBN1,FBLN5,EMILIN1,MFAP5,COL6A2,COL6A1,DCN,COL18A1,TGFBI,COL6A3,COL4A2,ADIPOQ	1	ECM
GO:0005518	GO:MF	collagen binding	0.00110150908051678	0.018598368698967	30	8	6	1909	GO:0044877	AEBP1,COMP,COL14A1,COL5A3,ASPN,ABI3BP,PCOLCE,PODN	COL14A1,AEBP1,PODN,PCOLCE,ASPN,ABI3BP	3	ECM
GO:0005539	GO:MF	glycosaminoglycan binding	1.46608980456265e-06	0.00105678962060253	75	32	25	1926	GO:0097367	HAPLN1,APOB,POSTN,LTBP2,COMP,ANG,SERPINA5,HAPLN3,COL5A3,SERPINE2,PGLYRP2,CLEC3B,BGN,ABI3BP,CCDC80,PCOLCE,APOE,VCAN,PRELP,SERPIND1,SLIT2,COL16A1,TNXB,CFH,THBS4,COL5A1,ANXA6,KNG1,SERPINC1,HRG,SOD3,APOH	APOB,SERPINA5,PGLYRP2,POSTN,CLEC3B,HAPLN1,PCOLCE,SERPIND1,ANG,ABI3BP,APOE,HRG,CFH,KNG1,BGN,APOH,PRELP,TNXB,SERPINC1,VCAN,FBN1,F2,DPYSL3,SOD3,DCN	3	ECM
GO:0008201	GO:MF	heparin binding	3.00505797939061e-06	0.00190753470730815	56	26	18	2066	GO:0005539, GO:0043168, GO:1901681	APOB,POSTN,LTBP2,COMP,ANG,SERPINA5,COL5A3,SERPINE2,CLEC3B,ABI3BP,CCDC80,PCOLCE,APOE,PRELP,SERPIND1,SLIT2,COL16A1,TNXB,CFH,THBS4,COL5A1,KNG1,SERPINC1,HRG,SOD3,APOH	APOB,SERPINA5,POSTN,CLEC3B,PCOLCE,SERPIND1,ANG,ABI3BP,APOE,HRG,CFH,KNG1,APOH,PRELP,TNXB,SERPINC1,FBN1,F2	4	ECM
GO:0008307	GO:MF	structural constituent of muscle	0.0279980499292593		32	12		2112	GO:0005198	SORBS2,TPM1,CSRP1,MYH11,PDLIM3,MYL6B,TTN,TPM4,SYNM,CSRP3,PLEC,NEBL		19	MUSC
GO:0017166	GO:MF	vinculin binding		0.014771299179111	11		5	4059	GO:0008092		UTRN,ACTN1,SYNM,TLN1,DMD	17	SKEL
GO:0030020	GO:MF	extracellular matrix structural constituent conferring tensile strength	1.90782288223324e-07	0.00425091549972764	23	17	9	4776	GO:0005201	COL12A1,COL14A1,COL4A6,COL3A1,COL5A3,COL1A1,COL1A2,COL16A1,COL4A1,COL2A1,COL5A1,COL6A2,COL5A2,COL6A1,COL6A3,COL18A1,COL4A2	COL14A1,COL6A6,COL12A1,COL28A1,COL6A2,COL6A1,COL18A1,COL6A3,COL4A2	2	ECM
GO:0030021	GO:MF	extracellular matrix structural constituent conferring compression resistance	2.24500790233895e-05	0.000295774903383213	12	7	8	4777	GO:0005201	HAPLN1,FMOD,ASPN,BGN,PODN,VCAN,PRELP	HAPLN1,PODN,ASPN,BGN,OGN,PRELP,VCAN,DCN	2	ECM
GO:0030023	GO:MF	extracellular matrix constituent conferring elasticity		0.00105378069088126	8		5	4779	GO:0005201, GO:0097493		ELN,FBLN2,FBN1,FBLN5,EMILIN1	2	ECM
GO:0030492	GO:MF	hemoglobin binding	8.80904471727296e-05	0.000153758614603298	6	4	5	4915	GO:0005515	SLC4A1,HBG1,HBD,HBB	SLC4A1,HBD,HBG1,HBB,HPR	5	other terms
GO:0031210	GO:MF	phosphatidylcholine binding		0.0459883092513572	13		4	5103	GO:0005543, GO:0050997, GO:0070405		SERPINA5,APOA4,APOA1,APOA2	25	other terms
GO:0031721	GO:MF	hemoglobin alpha binding	0.000659417303816171	0.000553384239704885	3	3	3	5196	GO:0030492	HBG1,HBD,HBB	HBD,HBG1,HBB	9	other terms
GO:0035473	GO:MF	lipase binding		0.0340647285285217	4		1	6372	GO:0019899		APOB	23	other terms
GO:0042805	GO:MF	actinin binding	0.0305351202136133		21	11		6763	GO:0008092	PDLIM4,RELA,CSRP1,PDLIM3,TTN,LMO7,SYNPO2,CSRP3,MYPN,PDLIM1,PDLIM5		21	SKEL
GO:0043394	GO:MF	proteoglycan binding	0.0063628307100216		18	8		6882	GO:0005515, GO:0097367	COMP,COL5A3,APOE,SLIT2,COL2A1,CFH,COL5A1,HRG		14	ECM
GO:0048407	GO:MF	platelet-derived growth factor binding	0.000178814477332892		8	7		8489	GO:0019838	COL3A1,COL1A1,COL1A2,COL4A1,COL2A1,COL5A1,COL6A1		6	ECM
GO:0051371	GO:MF	muscle alpha-actinin binding	0.0294745576526528		14	7		9224	GO:0051393	PDLIM4,PDLIM3,TTN,SYNPO2,MYPN,PDLIM1,PDLIM5		20	MUSC
GO:0060228	GO:MF	phosphatidylcholine-sterol O-acyltransferase activator activity	0.000933533170506327	0.000295774903383213	4	4	4	9686	GO:0008047	APOA4,APOE,APOA2,APOA1	APOA4,APOE,APOA1,APOA2	8	other terms
GO:0061134	GO:MF	peptidase regulator activity		0.00041455341035163	80		22	9699	GO:0030234		SERPINA5,SERPINA4,TIMP3,SERPINA7,PCOLCE,SERPIND1,COL28A1,FBLN1,ARRB1,AHSG,SERPING1,CST3,HRG,A2M,KNG1,PAPLN,C3,ITIH4,SERPINF1,C4B,AMBP,SERPINC1	8	ECM
GO:0070325	GO:MF	lipoprotein particle receptor binding	0.0321178195833865	0.0340647285285217	19	5	4	9957	GO:0005102	APOB,APOE,APOA2,APOC3,APOA1	APOB,APOE,APOA1,APOA2	22	other terms
GO:0070653	GO:MF	high-density lipoprotein particle receptor binding	0.00184531993011459	0.0282233183933671	3	3	2	10014	GO:0070325	APOA2,APOC3,APOA1	APOA1,APOA2	13	other terms
GO:0097493	GO:MF	structural molecule activity conferring elasticity	0.0274841494663207	0.00157663971520982	10	5	6	10437	GO:0005198	ELN,FBLN2,EMILIN1,FBN1,TTN	ELN,FBLN2,FBN1,FBLN5,EMILIN1,AHNAK	12	ECM
GO:0120020	GO:MF	cholesterol transfer activity	0.0109616290458832	0.00137509985821836	7	5	5	11718	GO:0120015	APOB,APOA4,APOE,APOA2,APOA1	APOB,APOA4,APOE,APOA1,APOA2	11	other terms
GO:1901681	GO:MF	sulfur compound binding	0.000924741655808845		97	27		11877	GO:0005488	APOB,POSTN,LTBP2,COMP,ANG,SERPINA5,COL5A3,SERPINE2,CLEC3B,ABI3BP,CCDC80,PCOLCE,APOE,PRELP,SERPIND1,SLIT2,COL16A1,TNXB,CFH,THBS4,COL5A1,ANXA6,KNG1,SERPINC1,HRG,SOD3,APOH		10	ECM

## Sheet: ASandMRvC_do
GO term enrichment results of proteins with a negative log2 fold change in AS vs CON and MR vs CON. Results were generated using gprofiler2 with false discovery rate set to 5%.
AvC = AS vs CON
MvC = MR vs CON
AS = aortic valve stenosis, MR = mitral valve regurgitation, CON = controls, up = positive log2 fold change in differential expression analysis, do = negative log2 fold change in differential expression analysis
BP = biological processes, CC = cellular compartment, MF = molecular function
			p-value
term_id	source	term_name	AvC_do	MvC_do	term_size	AvC_do_intersection_size	MvC_do_intersection_size	AvC_do_intersection	MvC_do_intersection	annotation
GO:0000184	GO:BP	nuclear-transcribed mRNA catabolic process, nonsense-mediated decay	3.89589156487466e-07		84	50		RPS15,RPL37A,RPS27,RPS24,RPLP1,NBAS,RPL24,RPS17,RPS15A,GSPT1,RPL21,RPL27,PABPC1,RPS13,RPS25,RPL18A,RPL23,RPS8,RPL22,RPS16,RPL9,RPL10,RPL36,RPS21,RPL15,RPL27A,RPS3A,RPL23A,RPS6,RPL13,EIF4A3,RPL5,RPS9,RPS18,RPS2,RPS3,RPL19,EIF3E,RPS4X,RPLP2,RPL13A,RPL7,RPS28,RPS19,ETF1,RPS7,RPL12,RPL11,EIF4G1,PPP2R1A		PROT
GO:0006099	GO:BP	tricarboxylic acid cycle	0.0263726275721568	0.0318347956241454	33	18	7	DHTKD1,ME3,SDHC,ME2,FAHD1,SUCLG2,MDH2,CS,IDH2,IDH3A,SUCLG1,SDHB,OGDH,SDHA,FH,MDH1,SUCLA2,DLD	ME2,SUCLG2,CS,SDHB,SDHA,DLD,PDHA1	MET
GO:0006119	GO:BP	oxidative phosphorylation	0.000638578834533295	0.0292790426097428	115	53	14	TEFM,BID,UQCR11,NDUFAF1,AFG1L,NDUFA1,MT-ND1,NDUFB1,PDE12,NDUFV3,SHMT2,MT-ATP6,NDUFS4,SDHC,NDUFB9,NDUFS8,NDUFS3,UQCRC2,NDUFB4,COX7A1,NDUFA9,NDUFS2,ATP5F1B,UQCRQ,NDUFA10,CYCS,COX5A,NIPSNAP2,ATP5PO,NDUFA12,NDUFA2,CYC1,NDUFA5,UQCRC1,NDUFB7,ATP5PD,NDUFB3,UQCRB,NDUFV1,NDUFS5,ATP5MG,ATP5PB,NDUFA13,ATP5F1A,ATP5F1C,NDUFV2,NDUFB6,NDUFS7,PPIF,NDUFS1,NDUFB10,SDHA,STOML2	NDUFV3,COX6B1,MT-CO2,SHMT2,COX5A,UQCRQ,NDUFV2,NDUFS3,UQCRC1,NIPSNAP2,ATP5PD,ATP5F1A,SDHA,DLD	MET
GO:0006120	GO:BP	mitochondrial electron transport, NADH to ubiquinone	0.00185441291342807		49	26		NDUFAF1,NDUFA1,MT-ND1,NDUFB1,NDUFV3,NDUFS4,NDUFB9,NDUFS8,NDUFS3,NDUFB4,NDUFA9,NDUFS2,NDUFA10,NDUFA12,NDUFA2,NDUFA5,NDUFB7,NDUFB3,NDUFV1,NDUFS5,NDUFA13,NDUFV2,NDUFB6,NDUFS7,NDUFS1,NDUFB10		MET
GO:0006413	GO:BP	translational initiation	0.0017398082429262		131	64		RPS15,RPL37A,RPS27,RPS24,RPLP1,MTIF3,EIF3M,RPL24,RPS17,RPS15A,EIF2B4,RPL21,RPL27,EIF5B,PABPC1,EIF4A1,RPS13,RPS25,EIF3F,RPL18A,RPL23,RPS8,EIF3A,RPL22,RPS16,RPL9,RPL10,RPL36,RPS21,RPL15,RPL27A,RPS3A,RPL23A,RPS6,RPL13,MCTS1,RPL5,ABCE1,RPS9,RPS18,RPS2,EIF5,RPS3,EIF1,RPL19,EIF3E,RPS4X,RPLP2,RPL13A,RPL7,RPS28,RPS19,DDX3X,COPS5,RPS7,RPL12,RPL11,EIF4G1,EIF4H,EIF3C,EIF3L,RPL10A,EIF3B,RPS20		PROT
GO:0006418	GO:BP	tRNA aminoacylation for protein translation	1.03888916660216e-05		43	28		CARS2,CARS,FARS2,LARS2,WARS,AIMP1,SARS2,WARS2,KARS,IARS,LARS,SARS,PPA1,FARSB,RARS,AIMP2,MARS,HARS2,EARS2,VARS,PPA2,TARS,DARS,QARS,GARS,AARS,IARS2,EPRS		PROT
GO:0006613	GO:BP	cotranslational protein targeting to membrane	1.20778726359289e-07		81	45		RPS15,RPL37A,RPS27,RPS24,RPLP1,SRPRA,RPL24,SRP54,RPS17,RPS15A,RPL21,RPL27,RPS13,RPS25,RPL18A,RPL23,RPS8,RPL22,RPS16,RPL9,RPL10,SSR1,RPL36,RPS21,RPL15,RPL27A,RPS3A,RPL23A,RPS6,RPL13,RPL5,RPS9,RPS18,RPS2,RPS3,RPL19,RPS4X,RPLP2,RPL13A,RPL7,RPS28,RPS19,RPS7,RPL12,RPL11		PROT
GO:0006614	GO:BP	SRP-dependent cotranslational protein targeting to membrane	1.20778726359289e-07		80	44		RPS15,RPL37A,RPS27,RPS24,RPLP1,SRPRA,RPL24,SRP54,RPS17,RPS15A,RPL21,RPL27,RPS13,RPS25,RPL18A,RPL23,RPS8,RPL22,RPS16,RPL9,RPL10,RPL36,RPS21,RPL15,RPL27A,RPS3A,RPL23A,RPS6,RPL13,RPL5,RPS9,RPS18,RPS2,RPS3,RPL19,RPS4X,RPLP2,RPL13A,RPL7,RPS28,RPS19,RPS7,RPL12,RPL11		PROT
GO:0006635	GO:BP	fatty acid beta-oxidation	0.00588136169634412		47	31		ACOX3,MCAT,ACOT8,PLIN5,ACOX2,ABCD3,ECHDC2,ACACB,GCDH,HADH,EHHADH,ACAT1,ACAA1,DECR1,AUH,HADHB,SCP2,ECH1,HADHA,ACAA2,ECHDC1,ETFA,ECI2,ECI1,MECR,HSD17B4,ACADVL,CPT2,ETFDH,ETFB,CRAT		MET
GO:0008228	GO:BP	opsonization	0.0441152546323421		6	2		PTX3,CRP		other terms
GO:0009060	GO:BP	aerobic respiration		0.013820499777848	71		12		COX6B1,MT-CO2,SHMT2,COX5A,ME2,SUCLG2,UQCRC1,CS,SDHB,SDHA,DLD,PDHA1	MET
GO:0009081	GO:BP	branched-chain amino acid metabolic process	0.00234349989567754		19	15		BCKDHB,BCKDK,HIBADH,BCKDHA,BCAT2,HMGCL,ACAT1,MCCC1,AUH,MCCC2,ALDH6A1,ACADSB,ACAD8,HSD17B10,DLD		MET
GO:0022904	GO:BP	respiratory electron transport chain	0.000210993772562288		96	49		BID,UQCR11,NDUFAF1,AFG1L,NDUFA1,ETFRF1,MT-ND1,NDUFB1,NDUFV3,NDUFS4,SDHC,NDUFB9,NDUFS8,NDUFS3,UQCRC2,NDUFB4,NDUFAF2,NDUFA9,NDUFS2,UQCRQ,NDUFA10,CYCS,COX5A,NDUFA12,NDUFA2,GPD2,CYC1,NDUFA5,UQCRC1,ALDH5A1,NDUFB7,NDUFB3,UQCRB,NDUFV1,NDUFS5,ETFA,NDUFA13,SDHB,SLC25A13,NDUFV2,NDUFB6,NDUFS7,SLC25A12,NDUFS1,NDUFB10,SDHA,ETFDH,ETFB,DLD		MET
GO:0032543	GO:BP	mitochondrial translation	0.0163180690441881		105	38		MRPL10,QRSL1,MRPL15,MTIF3,MRPL38,MRPS9,FASTKD2,MRPL14,MRPS5,MRPL19,MRPL28,MRPL47,MRPL9,MRPL17,GADD45GIP1,LARS2,SHMT2,MRPL13,MRPS16,MRPL46,C1QBP,CHCHD1,SARS2,MRPL44,TRMT10C,GFM1,MRPS6,WARS2,UQCC1,MRPS23,MRPS30,MRPS35,DAP3,MRPL39,MRPS25,MRPS34,EARS2,PTCD3		MET
GO:0032981	GO:BP	mitochondrial respiratory chain complex I assembly	1.03888916660216e-05		59	32		NDUFAF1,TMEM126B,NDUFA1,ECSIT,MT-ND1,NDUFB1,NDUFV3,NDUFS4,NDUFB9,NDUFS8,NDUFS3,NDUFB4,NDUFAF2,NDUFA9,NDUFS2,NDUFA10,BCS1L,NDUFA12,NDUFA2,NDUFA5,NDUFB7,NUBPL,ACAD9,NDUFB3,NDUFV1,NDUFS5,NDUFA13,NDUFAF4,NDUFV2,NDUFB6,NDUFS7,NDUFS1		MET
GO:0033108	GO:BP	mitochondrial respiratory chain complex assembly	0.00315609695189784		81	38		NDUFAF1,TMEM126B,NDUFA1,PET100,ECSIT,MT-ND1,NDUFB1,NDUFV3,NDUFS4,NDUFB9,NDUFS8,NDUFS3,NDUFB4,TFAM,UQCC1,NDUFAF2,NDUFA9,NDUFS2,NDUFA10,BCS1L,NDUFA12,NDUFA2,NDUFA5,NDUFB7,NUBPL,ACAD9,NDUFB3,UQCRB,NDUFV1,NDUFS5,NDUFA13,NDUFAF4,NDUFV2,NDUFB6,NDUFS7,NDUFS1,SAMM50,NDUFB10		MET
GO:0042775	GO:BP	mitochondrial ATP synthesis coupled electron transport	0.0028416418150026		83	38		BID,UQCR11,NDUFAF1,AFG1L,NDUFA1,MT-ND1,NDUFB1,NDUFV3,NDUFS4,SDHC,NDUFB9,NDUFS8,NDUFS3,UQCRC2,NDUFB4,NDUFA9,NDUFS2,UQCRQ,NDUFA10,CYCS,COX5A,NDUFA12,NDUFA2,CYC1,NDUFA5,UQCRC1,NDUFB7,NDUFB3,UQCRB,NDUFV1,NDUFS5,NDUFA13,NDUFV2,NDUFB6,NDUFS7,NDUFS1,NDUFB10,SDHA		MET
GO:0043039	GO:BP	tRNA aminoacylation	1.03888916660216e-05		44	29		CARS2,QRSL1,CARS,FARS2,LARS2,WARS,AIMP1,SARS2,WARS2,KARS,IARS,LARS,SARS,PPA1,FARSB,RARS,AIMP2,MARS,HARS2,EARS2,VARS,PPA2,TARS,DARS,QARS,GARS,AARS,IARS2,EPRS		PROT
GO:0045047	GO:BP	protein targeting to ER	1.88516237320514e-06		90	45		RPS15,RPL37A,SPCS1,RPS27,RPS24,RPLP1,SRPRA,RPL24,SRP54,RPS17,RPS15A,RPL21,RPL27,RPS13,RPS25,RPL18A,RPL23,RPS8,RPL22,RPS16,RPL9,RPL10,RPL36,RPS21,RPL15,RPL27A,RPS3A,RPL23A,RPS6,RPL13,RPL5,RPS9,RPS18,RPS2,RPS3,RPL19,RPS4X,RPLP2,RPL13A,RPL7,RPS28,RPS19,RPS7,RPL12,RPL11		PROT
GO:0045333	GO:BP	cellular respiration	8.34947662765539e-05	0.0331510204549546	142	72	16	BID,UQCR11,NDUFAF1,AFG1L,NDUFA1,ETFRF1,MT-ND1,DHTKD1,SIRT3,NDUFB1,NDUFV3,ME3,SHMT2,NDUFS4,SDHC,ME2,NDUFB9,NDUFS8,NDUFS3,UQCRC2,NDUFB4,NDUFAF2,FAHD1,SUCLG2,NDUFA9,NDUFS2,UQCRQ,NDUFA10,CYCS,COQ10B,MDH2,COX5A,CS,NDUFA12,IDH2,NDUFA2,GPD2,IDH3A,CYC1,NDUFA5,UQCRC1,ALDH5A1,TRAP1,NDUFB7,IDE,SUCLG1,NDUFB3,UQCRB,COQ10A,NDUFV1,NDUFS5,ETFA,NDUFA13,SDHB,SLC25A13,NDUFV2,NDUFB6,NDUFS7,SLC25A12,NDUFS1,OGDH,NDUFB…	NDUFV3,COX6B1,MT-CO2,SHMT2,COX5A,UQCRQ,ME2,SUCLG2,NDUFV2,NDUFS3,UQCRC1,CS,SDHB,SDHA,DLD,PDHA1	MET
GO:0046950	GO:BP	cellular ketone body metabolic process		0.0350242351900343	8		4		ACSS3,BDH1,ACAT1,OXCT1	MET
GO:0046952	GO:BP	ketone body catabolic process		0.0318347956241454	3		3		BDH1,ACAT1,OXCT1	MET
GO:0070125	GO:BP	mitochondrial translational elongation	0.0222549052313911		76	28		MRPL10,MRPL15,MRPL38,MRPS9,MRPL14,MRPS5,MRPL19,MRPL28,MRPL47,MRPL9,MRPL17,GADD45GIP1,MRPL13,MRPS16,MRPL46,CHCHD1,MRPL44,GFM1,MRPS6,MRPS23,MRPS30,MRPS35,DAP3,MRPL39,MRPS25,MRPS34,PTCD3,MRPS22		PROT
GO:0070972	GO:BP	protein localization to endoplasmic reticulum	0.00027459411831348		104	47		RPS15,RPL37A,GBF1,SPCS1,RPS27,RPS24,RPLP1,SRPRA,RPL24,SRP54,RPS17,RPS15A,RPL21,RPL27,RPS13,RPS25,RPL18A,RPL23,DDRGK1,RPS8,RPL22,RPS16,RPL9,RPL10,RPL36,RPS21,RPL15,RPL27A,RPS3A,RPL23A,RPS6,RPL13,RPL5,RPS9,RPS18,RPS2,RPS3,RPL19,RPS4X,RPLP2,RPL13A,RPL7,RPS28,RPS19,RPS7,RPL12,RPL11		PROT
GO:0140053	GO:BP	mitochondrial gene expression	0.0304992247634397		118	43		MRPL10,TEFM,TFB2M,QRSL1,MRPL15,MTIF3,MRPL38,MRPS9,FASTKD2,MRPL14,MRPS5,MRPL19,TBRG4,MRPL28,MRPL47,MRPL9,MRPL17,GADD45GIP1,LARS2,SHMT2,MRPL13,MRPS16,MRPL46,C1QBP,CHCHD1,SARS2,MRPL44,TRMT10C,GFM1,MRPS6,TFAM,WARS2,UQCC1,MRPS23,MRPS30,MRPS35,DAP3,MRPL39,SUPV3L1,MRPS25,MRPS34,EARS2,PTCD3		PROT
GO:1904869	GO:BP	regulation of protein localization to Cajal body	0.00588136169634412		8	8		CCT6A,CCT3,CCT2,CCT5,CCT4,CCT8,CCT7,TCP1		PROT
GO:0005743	GO:CC	mitochondrial inner membrane	0.000104504817841114	0.0172208243263397	331	139	27	MRPL10,CHDH,UQCR11,MPV17,HIGD1A,NDUFAF1,TMEM126B,PPOX,NDUFA1,MRPL15,PET100,MRPL38,ECSIT,MRPS9,MRPL14,BDH1,MRPS5,MT-ND1,SLC25A51,MRPL19,MRPL28,MRPL47,NDUFB1,MRPL9,MRPL17,NDUFV3,EXOG,GUF1,SHMT2,MRPL13,MPC1,IMMT,MRPS16,MRPL46,MT-ATP6,NDUFS4,SPG7,SDHC,STAT3,MTCH1,NDUFB9,NDUFS8,CHCHD1,NDUFS3,UQCRC2,NDUFB4,MRPL44,MRPS6,UQCC1,MAIP1,NDUFAF2,COX7A1,MRPS23,NDUFA9,L2HGDH,MRPS30,NDUFS2,SLC25A11,ATP5MD,ATP5F1…	IMMT,NDUFV3,PTPN1,COX11,TIMM17B,MRPL13,HIGD1A,COX6B1,MT-CO2,SHMT2,COX5A,SCO1,UQCRQ,MRPS25,SLC25A5,BDH1,TMEM126A,SLC25A6,NDUFV2,NDUFS3,UQCRC1,ATP5PD,ATP5F1A,SDHB,SDHA,SLC25A4,GOT2	MET
GO:0005746	GO:CC	mitochondrial respirasome	0.000109819901803106		74	37		NDUFAF1,NDUFA1,MT-ND1,NDUFB1,NDUFV3,NDUFS4,SDHC,NDUFB9,NDUFS8,NDUFS3,UQCRC2,NDUFB4,COX7A1,NDUFA9,NDUFS2,UQCRQ,NDUFA10,BCS1L,COX5A,NDUFA12,NDUFA2,CYC1,NDUFA5,UQCRC1,NDUFB7,NDUFB3,UQCRB,NDUFV1,NDUFS5,NDUFA13,SDHB,NDUFV2,NDUFB6,NDUFS7,NDUFS1,NDUFB10,SDHA		MET
GO:0005759	GO:CC	mitochondrial matrix	5.16733898308147e-11		336	166		PDK4,ACOT2,MRPL10,CARS2,TEFM,ACSS3,TFB2M,NDUFAF1,LIAS,MRPL15,BCKDHB,MRPL38,ACSF3,ATP5MF-PTCD1,MRPS9,FASTKD2,MRPL14,ACP6,BDH1,MRPS5,MCAT,FARS2,FLAD1,MRPL19,GLS,BCO2,DHTKD1,SIRT3,TBRG4,MMAA,MRPL28,MRPL47,MRPL9,MRPL17,PDE12,ME3,GADD45GIP1,LARS2,BCKDK,GUF1,SHMT2,ACSS1,NMNAT3,MRPL13,MRPS16,MRPL46,D2HGDH,AASS,ME2,HIBADH,BCKDHA,BCAT2,CCAR2,GCDH,MRM3,C1QBP,NDUFS8,DGLUCY,CHCHD1,NDUFS3,UQCRC2,SARS2,MRPL44,…		MET
GO:0005832	GO:CC	chaperonin-containing T-complex	0.00391335758048904		8	8		CCT6A,CCT3,CCT2,CCT5,CCT4,CCT8,CCT7,TCP1		PROT
GO:0005840	GO:CC	ribosome	3.13738786647215e-07		177	75		MRPL10,RPS15,RPL37A,RPS27,RPS24,RPLP1,MRPL15,MRPL38,BTF3,MRPS9,MRPL14,MRPS5,RPL24,GCN1,MRPL19,MRPL28,MRPL47,MRPL9,MRPL17,GADD45GIP1,RPS10-NUDT3,RPS17,RPS15A,RPL21,MRPL13,RPL27,MRPS16,MRPL46,RPS13,RPS25,RPL3L,RPL18A,CHCHD1,RPL23,RPS8,MRPL44,RPL22,RPS16,RPL9,RPL10,MRPS6,RPL36,RPS21,RPL15,RPL27A,MRPS23,MRPS30,RPS3A,MRPS35,RPL23A,RPS6,RPL13,MCTS1,DAP3,RPL5,RPS9,RPS6KA3,RPS18,RPS2,MRPL39,DHX9,RPS3,MRP…		PROT
GO:0005852	GO:CC	eukaryotic translation initiation factor 3 complex	0.0130974338098117		16	10		EIF3M,EIF3F,EIF3A,ABCE1,EIF3E,DDX3X,COPS5,EIF3C,EIF3L,EIF3B		PROT
GO:0005859	GO:CC	muscle myosin complex	0.00886867967046751		13	4		MYH4,MYH6,MYH8,MYL5		MUSC
GO:0015934	GO:CC	large ribosomal subunit	0.00237463379240366		86	35		MRPL10,RPL37A,RPLP1,MRPL15,MRPL38,MRPL14,RPL24,MRPL19,MRPL28,MRPL47,MRPL9,MRPL17,RPL21,MRPL13,RPL27,MRPL46,RPL3L,RPL18A,RPL23,MRPL44,RPL22,RPL9,RPL10,RPL36,RPL15,RPL27A,MRPS30,RPL23A,RPL13,RPL5,MRPL39,RPL19,RPLP2,RPL13A,RPL7		PROT
GO:0015935	GO:CC	small ribosomal subunit	3.00105866229894e-05		65	32		RPS15,RPS27,RPS24,MRPS9,MRPS5,RPS10-NUDT3,RPS17,RPS15A,MRPS16,RPS13,RPS25,RPS8,RPS16,MRPS6,RPS21,RPS3A,MRPS35,RPS6,MCTS1,DAP3,RPS9,RPS18,RPS2,RPS3,RPS4X,MRPS34,RPS28,RPS19,DDX3X,MRPS22,RPS7,RACK1		PROT
GO:0016460	GO:CC	myosin II complex	0.00285316755949926		19	5		MYH4,MYH6,MYL12B,MYH8,MYL5		MUSC
GO:0017101	GO:CC	aminoacyl-tRNA synthetase multienzyme complex	0.000433787825559572		11	10		AIMP1,KARS,IARS,LARS,RARS,AIMP2,MARS,DARS,QARS,EPRS		PROT
GO:0019866	GO:CC	organelle inner membrane	0.00724300621185325	0.0345656102656317	354	140	28	MRPL10,CHDH,UQCR11,MPV17,HIGD1A,NDUFAF1,TMEM126B,PPOX,NDUFA1,MRPL15,PET100,MRPL38,ECSIT,MRPS9,MRPL14,BDH1,MRPS5,MT-ND1,SLC25A51,ZMPSTE24,MRPL19,MRPL28,MRPL47,NDUFB1,MRPL9,DPY19L1,MRPL17,NDUFV3,EXOG,GUF1,SHMT2,MRPL13,MPC1,IMMT,MRPS16,MRPL46,MT-ATP6,NDUFS4,SPG7,SDHC,STAT3,MTCH1,NDUFB9,NDUFS8,CHCHD1,NDUFS3,UQCRC2,NDUFB4,MRPL44,MRPS6,UQCC1,MAIP1,NDUFAF2,COX7A1,MRPS23,NDUFA9,L2HGDH,MRPS30,NDUFS2,SLC25…	IMMT,NDUFV3,PTPN1,COX11,TIMM17B,MRPL13,HIGD1A,COX6B1,MT-CO2,SHMT2,COX5A,SCO1,UQCRQ,MRPS25,SLC25A5,BDH1,TMEM126A,SLC25A6,NDUFV2,NDUFS3,UQCRC1,TMX4,ATP5PD,ATP5F1A,SDHB,SDHA,SLC25A4,GOT2	MET
GO:0022625	GO:CC	cytosolic large ribosomal subunit	0.00189289851969279		43	23		RPL37A,RPLP1,RPL24,RPL21,RPL27,RPL3L,RPL18A,RPL23,RPL22,RPL9,RPL10,RPL36,RPL15,RPL27A,RPL23A,RPL13,RPL5,RPL19,RPLP2,RPL13A,RPL7,RPL12,RPL11		PROT
GO:0022626	GO:CC	cytosolic ribosome	3.58907369070287e-08		81	47		RPS15,RPL37A,RPS27,RPS24,RPLP1,RPL24,RPS10-NUDT3,RPS17,RPS15A,RPL21,RPL27,RPS13,RPS25,RPL3L,RPL18A,RPL23,RPS8,RPL22,RPS16,RPL9,RPL10,RPL36,RPS21,RPL15,RPL27A,RPS3A,RPL23A,RPS6,RPL13,MCTS1,RPL5,RPS9,RPS18,RPS2,RPS3,RPL19,RPS4X,RPLP2,RPL13A,RPL7,RPS28,RPS19,DDX3X,RPS7,RPL12,RPL11,RACK1		PROT
GO:0022627	GO:CC	cytosolic small ribosomal subunit	8.25238241320925e-06		38	24		RPS15,RPS27,RPS24,RPS10-NUDT3,RPS17,RPS15A,RPS13,RPS25,RPS8,RPS16,RPS21,RPS3A,RPS6,MCTS1,RPS9,RPS18,RPS2,RPS3,RPS4X,RPS28,RPS19,DDX3X,RPS7,RACK1		PROT
GO:0030964	GO:CC	NADH dehydrogenase complex	6.44117944614412e-05		45	26		NDUFAF1,NDUFA1,MT-ND1,NDUFB1,NDUFV3,NDUFS4,NDUFB9,NDUFS8,NDUFS3,NDUFB4,NDUFA9,NDUFS2,NDUFA10,NDUFA12,NDUFA2,NDUFA5,NDUFB7,NDUFB3,NDUFV1,NDUFS5,NDUFA13,NDUFV2,NDUFB6,NDUFS7,NDUFS1,NDUFB10		MET
GO:0044391	GO:CC	ribosomal subunit	3.70320285713679e-08		149	69		MRPL10,RPS15,RPL37A,RPS27,RPS24,RPLP1,MRPL15,MRPL38,MRPS9,MRPL14,MRPS5,RPL24,MRPL19,MRPL28,MRPL47,MRPL9,MRPL17,RPS10-NUDT3,RPS17,RPS15A,RPL21,MRPL13,RPL27,MRPS16,MRPL46,RPS13,RPS25,RPL3L,RPL18A,RPL23,RPS8,MRPL44,RPL22,RPS16,RPL9,RPL10,MRPS6,RPL36,RPS21,RPL15,RPL27A,MRPS30,RPS3A,MRPS35,RPL23A,RPS6,RPL13,MCTS1,DAP3,RPL5,RPS9,RPS18,RPS2,MRPL39,RPS3,RPL19,RPS4X,MRPS34,RPLP2,RPL13A,RPL7,RPS28,RPS19,DD…		PROT
GO:0070069	GO:CC	cytochrome complex		0.0345656102656317	23		5		COX6B1,MT-CO2,COX5A,UQCRQ,UQCRC1	MET
GO:0070469	GO:CC	respirasome	0.000158604320139536	0.00985317491167952	84	40	11	UQCR11,HIGD1A,NDUFAF1,NDUFA1,MT-ND1,NDUFB1,NDUFV3,NDUFS4,SDHC,NDUFB9,NDUFS8,NDUFS3,UQCRC2,NDUFB4,COX7A1,NDUFA9,NDUFS2,UQCRQ,NDUFA10,BCS1L,CYCS,COX5A,NDUFA12,NDUFA2,CYC1,NDUFA5,UQCRC1,NDUFB7,NDUFB3,UQCRB,NDUFV1,NDUFS5,NDUFA13,SDHB,NDUFV2,NDUFB6,NDUFS7,NDUFS1,NDUFB10,SDHA	NDUFV3,HIGD1A,COX6B1,MT-CO2,COX5A,UQCRQ,NDUFV2,NDUFS3,UQCRC1,SDHB,SDHA	MET
GO:0098798	GO:CC	mitochondrial protein complex	8.53783662954289e-08	0.0497205248221775	206	99	17	MRPL10,NDUFAF1,NDUFA1,TOMM7,MRPL15,BCKDHB,MRPL38,MRPS9,MRPL14,MRPS5,MT-ND1,MRPL19,MRPL28,MRPL47,NDUFB1,MRPL9,MRPL17,NDUFV3,BCKDK,BAX,MRPL13,IMMT,MRPS16,MRPL46,MT-ATP6,NDUFS4,SPG7,SDHC,MFN1,BCKDHA,NDUFB9,NDUFS8,NDUFS3,UQCRC2,NDUFB4,MRPL44,TRMT10C,MRPS6,SUCLG2,NDUFA9,MRPS30,NDUFS2,ATP5MD,ATP5F1B,UQCRQ,NDUFA10,BCS1L,MRPS35,MTX2,COX5A,MCCC1,SLC25A6,DAP3,ATP5PO,NDUFA12,MRPL39,SUPV3L1,PDK1,NDUFA2,CYC1,…	IMMT,NDUFV3,TIMM17B,MRPL13,COX5A,UQCRQ,SUCLG2,SLC25A6,NDUFV2,NDUFS3,UQCRC1,ATP5PD,ATP5F1A,MCCC1,SDHB,SDHA,PDHA1	MET
GO:0098800	GO:CC	inner mitochondrial membrane protein complex	5.95660595726162e-05	0.00985317491167952	104	52	13	NDUFAF1,NDUFA1,MT-ND1,NDUFB1,NDUFV3,IMMT,MT-ATP6,NDUFS4,SPG7,SDHC,NDUFB9,NDUFS8,NDUFS3,UQCRC2,NDUFB4,NDUFA9,NDUFS2,ATP5MD,ATP5F1B,UQCRQ,NDUFA10,BCS1L,COX5A,SLC25A6,ATP5PO,NDUFA12,NDUFA2,CYC1,NDUFA5,UQCRC1,NDUFB7,AGK,ATP5PD,NDUFB3,UQCRB,NDUFV1,NDUFS5,ATP5MG,ATP5PB,DNAJC11,NDUFA13,SDHB,ATP5F1A,ATP5F1C,NDUFV2,NDUFB6,NDUFS7,PPIF,NDUFS1,GRPEL1,NDUFB10,SDHA	IMMT,NDUFV3,TIMM17B,COX5A,UQCRQ,SLC25A6,NDUFV2,NDUFS3,UQCRC1,ATP5PD,ATP5F1A,SDHB,SDHA	MET
GO:0098803	GO:CC	respiratory chain complex	0.000158604320139536	0.00985317491167952	71	36	10	NDUFAF1,NDUFA1,MT-ND1,NDUFB1,NDUFV3,NDUFS4,SDHC,NDUFB9,NDUFS8,NDUFS3,UQCRC2,NDUFB4,NDUFA9,NDUFS2,UQCRQ,NDUFA10,BCS1L,COX5A,NDUFA12,NDUFA2,CYC1,NDUFA5,UQCRC1,NDUFB7,NDUFB3,UQCRB,NDUFV1,NDUFS5,NDUFA13,SDHB,NDUFV2,NDUFB6,NDUFS7,NDUFS1,NDUFB10,SDHA	NDUFV3,COX6B1,MT-CO2,COX5A,UQCRQ,NDUFV2,NDUFS3,UQCRC1,SDHB,SDHA	MET
GO:1990204	GO:CC	oxidoreductase complex	0.000581683509923183		88	43		NDUFAF1,NDUFA1,BCKDHB,MT-ND1,DHTKD1,NDUFB1,NDUFV3,BCKDK,NDUFS4,SDHC,BCKDHA,NDUFB9,NDUFS8,NDUFS3,UQCRC2,NDUFB4,NDUFA9,NDUFS2,UQCRQ,NDUFA10,BCS1L,NDUFA12,PDK1,NDUFA2,GPD2,CYC1,NDUFA5,UQCRC1,NDUFB7,NDUFB3,UQCRB,NDUFV1,NDUFS5,NDUFA13,SDHB,NDUFV2,NDUFB6,NDUFS7,NDUFS1,PDK2,OGDH,NDUFB10,SDHA		MET
GO:0001849	GO:MF	complement component C1q complex binding	0.0133117554104071	0.0204902653990634	7	3	2	PTX3,CRP,CD93	PTX3,CRP	other terms
GO:0003735	GO:MF	structural constituent of ribosome	1.55903567267421e-08		133	65		MRPL10,RPS15,RPL37A,RPS27,RPS24,RPLP1,MRPL15,MRPS9,MRPL14,MRPS5,RPL24,MRPL19,MRPL28,MRPL47,MRPL9,MRPL17,RPS10-NUDT3,RPS17,RPS15A,RPL21,MRPL13,RPL27,MRPS16,MRPL46,RPS13,RPS25,RPL3L,RPL18A,RPL23,RPS8,RPL22,RPS16,RPL9,RPL10,MRPS6,RPL36,RPS21,RPL15,RPL27A,MRPS23,MRPS30,RPS3A,MRPS35,RPL23A,RPS6,RPL13,DAP3,RPL5,RPS9,RPS18,RPS2,RPS3,MRPS25,RPL19,RPS4X,MRPS34,RPLP2,RPL13A,RPL7,RPS28,RPS19,MRPS22,RPS7,RPL…		PROT
GO:0003987	GO:MF	acetate-CoA ligase activity		0.0403771804325657	3		2		ACSS1,ACSS3	MET
GO:0004300	GO:MF	enoyl-CoA hydratase activity	0.00715394674675294		8	7		ECHDC2,EHHADH,AUH,HADHB,HADHA,ECHDC1,ECI1		MET
GO:0004812	GO:MF	aminoacyl-tRNA ligase activity	0.000164171407156589		39	24		CARS2,CARS,FARS2,LARS2,WARS,SARS2,WARS2,KARS,IARS,LARS,SARS,FARSB,RARS,MARS,HARS2,EARS2,VARS,TARS,DARS,QARS,GARS,AARS,IARS2,EPRS		PROT
GO:0005471	GO:MF	ATP:ADP antiporter activity		0.0187597633826089	3		3		SLC25A5,SLC25A6,SLC25A4	MET
GO:0009055	GO:MF	electron transfer activity		0.00317212101639587	77		13		COX11,GLRX5,COX6B1,MT-CO2,COX5A,UQCRQ,ME2,NDUFV2,NDUFS3,UQCRC1,SDHB,SDHA,DLD	MET
GO:0016655	GO:MF	oxidoreductase activity, acting on NAD(P)H, quinone or similar compound as acceptor	0.000862832983696379		53	28		TP53I3,NDUFA1,MT-ND1,NDUFB1,NDUFV3,NDUFS4,NDUFB9,NDUFS8,NDUFS3,NDUFB4,NDUFAF2,NDUFA9,NDUFS2,DCXR,NDUFA10,NDUFA12,NDUFA2,NDUFA5,NDUFB7,NDUFB3,NDUFV1,NDUFS5,NDUFA13,NDUFV2,NDUFB6,NDUFS7,NDUFS1,NDUFB10		MET
GO:0050136	GO:MF	NADH dehydrogenase (quinone) activity	2.79111184327882e-05		42	26		NDUFA1,MT-ND1,NDUFB1,NDUFV3,NDUFS4,NDUFB9,NDUFS8,NDUFS3,NDUFB4,NDUFAF2,NDUFA9,NDUFS2,NDUFA10,NDUFA12,NDUFA2,NDUFA5,NDUFB7,NDUFB3,NDUFV1,NDUFS5,NDUFA13,NDUFV2,NDUFB6,NDUFS7,NDUFS1,NDUFB10		MET

## Sheet: term_cat_mapping
Assignment of GO term ids to five categories of ECM - extracellular matrix, MET - metabolism, PROT - proteostasis, MUSC_SCKEL - muscle contraction and cytoskeleton and other terms.
term_id	annotation
GO:0002455	other terms
GO:0002576	other terms
GO:0002920	other terms
GO:0003418	ECM
GO:0006956	other terms
GO:0006957	other terms
GO:0006958	other terms
GO:0006959	other terms
GO:0007597	other terms
GO:0010873	other terms
GO:0010903	other terms
GO:0010951	other terms
GO:0015671	other terms
GO:0015701	other terms
GO:0030193	other terms
GO:0030195	other terms
GO:0030199	ECM
GO:0030300	other terms
GO:0030449	other terms
GO:0031639	other terms
GO:0034371	other terms
GO:0034372	other terms
GO:0042730	other terms
GO:0042744	other terms
GO:0043062	ECM
GO:0048251	ECM
GO:0048821	other terms
GO:0050818	other terms
GO:0050819	other terms
GO:0051764	SKEL
GO:0051917	other terms
GO:0051918	other terms
GO:0061045	other terms
GO:0072376	other terms
GO:0072378	other terms
GO:0090171	ECM
GO:1900046	other terms
GO:1900047	other terms
GO:1904478	other terms
GO:0001527	ECM
GO:0005577	other terms
GO:0005579	other terms
GO:0005581	ECM
GO:0005588	ECM
GO:0005589	ECM
GO:0005593	ECM
GO:0005604	ECM
GO:0005788	PROT
GO:0005862	MUSC
GO:0008091	SKEL
GO:0014731	SKEL
GO:0016460	MUSC
GO:0030016	MUSC
GO:0030016	MUSC
GO:0030055	SKEL
GO:0030863	SKEL
GO:0031012	ECM
GO:0031089	other terms
GO:0031091	other terms
GO:0031093	other terms
GO:0031838	other terms
GO:0031983	PROT
GO:0032432	SKEL
GO:0034363	other terms
GO:0034364	other terms
GO:0034365	other terms
GO:0034366	other terms
GO:0034774	other terms
GO:0042383	MUSC
GO:0042627	other terms
GO:0042641	MUSC
GO:0043034	SKEL
GO:0043292	MUSC
GO:0043292	MUSC
GO:0044217	other terms
GO:0062023	ECM
GO:0071682	other terms
GO:0071953	ECM
GO:0072562	other terms
GO:0090665	SKEL
GO:0097517	MUSC
GO:0098643	ECM
GO:0098644	ECM
GO:0098647	ECM
GO:0001848	other terms
GO:0003779	MUSC
GO:0004064	other terms
GO:0004089	other terms
GO:0004857	ECM
GO:0004866	ECM
GO:0004867	ECM
GO:0005198	ECM
GO:0005200	SKEL
GO:0005201	ECM
GO:0005518	ECM
GO:0005539	ECM
GO:0008201	ECM
GO:0008307	MUSC
GO:0017166	SKEL
GO:0030020	ECM
GO:0030021	ECM
GO:0030023	ECM
GO:0030492	other terms
GO:0031210	other terms
GO:0031721	other terms
GO:0035473	other terms
GO:0042805	SKEL
GO:0043394	ECM
GO:0048407	ECM
GO:0051371	MUSC
GO:0060228	other terms
GO:0061134	ECM
GO:0070325	other terms
GO:0070653	other terms
GO:0097493	ECM
GO:0120020	other terms
GO:1901681	ECM
GO:0000184	PROT
GO:0006099	MET
GO:0006119	MET
GO:0006120	MET
GO:0006413	PROT
GO:0006418	PROT
GO:0006613	PROT
GO:0006614	PROT
GO:0006635	MET
GO:0008228	other terms
GO:0009060	MET
GO:0009081	MET
GO:0022904	MET
GO:0032543	MET
GO:0032981	MET
GO:0033108	MET
GO:0042775	MET
GO:0043039	PROT
GO:0045047	PROT
GO:0045333	MET
GO:0046950	MET
GO:0046952	MET
GO:0070125	PROT
GO:0070972	PROT
GO:0140053	PROT
GO:1904869	PROT
GO:0005743	MET
GO:0005746	MET
GO:0005759	MET
GO:0005832	PROT
GO:0005840	PROT
GO:0005852	PROT
GO:0005859	MUSC
GO:0015934	PROT
GO:0015935	PROT
GO:0016460	MUSC
GO:0017101	PROT
GO:0019866	MET
GO:0022625	PROT
GO:0022626	PROT
GO:0022627	PROT
GO:0030964	MET
GO:0044391	PROT
GO:0070069	MET
GO:0070469	MET
GO:0098798	MET
GO:0098800	MET
GO:0098803	MET
GO:1990204	MET
GO:0001849	other terms
GO:0003735	PROT
GO:0003987	MET
GO:0004300	MET
GO:0004812	PROT
GO:0005471	MET
GO:0009055	MET
GO:0016655	MET
GO:0050136	MET
GO:0016010	SKEL
GO:0001725	MUSC
GO:0005583	ECM
GO:0044307	SKEL
GO:0004064	other terms
GO:0004089	other terms
GO:0002002	other terms
GO:0002479	PROT
GO:0006521	PROT
GO:0008228	other terms
GO:0042590	PROT
GO:0070125	PROT
GO:0140053	PROT
GO:1902036	PROT
GO:1904869	PROT
GO:0005859	MUSC
GO:0008540	PROT
GO:0008541	PROT
GO:0031597	PROT
GO:1905368	PROT
GO:0001849	other terms
GO:0004812	PROT
GO:0050136	MET
GO:0002003	other terms
GO:0002479	PROT
GO:0006521	PROT
GO:0010951	other terms
GO:0015701	other terms
GO:0042590	PROT
GO:1902036	PROT
GO:1904869	PROT
GO:0008540	PROT
GO:0008541	PROT
GO:0030055	SKEL
GO:0031597	PROT
GO:0044217	other terms
GO:0044307	SKEL
GO:0090665	SKEL
GO:0098643	ECM
GO:1905368	PROT
GO:0001848	other terms
GO:0003779	SKEL
GO:0004064	other terms
GO:0004089	other terms
GO:0031210	other terms
GO:0000956	PROT
GO:0001732	PROT
GO:0002183	PROT
GO:0006084	MET
GO:0006104	MET
GO:0006401	PROT
GO:0006402	PROT
GO:0006412	PROT
GO:0006551	MET
GO:0006573	MET
GO:0006605	PROT
GO:0006612	PROT
GO:0009063	MET
GO:0010257	MET
GO:0010510	MET
GO:0016054	MET
GO:0019083	PROT
GO:0035383	MET
GO:0042773	MET
GO:0043043	PROT
GO:0046395	MET
GO:0046459	MET
GO:0071616	MET
GO:0090150	PROT
GO:0140053	PROT
GO:1904182	MET
GO:1904183	MET
GO:1904869	PROT
GO:0005750	MET
GO:0005844	PROT
GO:0016282	PROT
GO:0030062	MET
GO:0033290	PROT
GO:0042788	PROT
GO:0045261	MET
GO:0045271	MET
GO:0071541	PROT
GO:1990904	PROT
GO:0001849	other terms
GO:0003743	PROT
GO:0003954	MET
GO:0003985	MET
GO:0004473	MET
GO:0004774	MET
GO:0008135	PROT
GO:0008948	MET
GO:0016408	MET
GO:0016615	MET
GO:0016875	PROT
GO:0016878	MET
GO:0031369	PROT
GO:0045182	PROT
GO:0050136	MET
GO:0051287	MET
GO:0090079	PROT
GO:1990948	PROT
GO:0002697	other terms
GO:0007596	other terms
GO:0009611	other terms
GO:0010951	other terms
GO:0015701	other terms
GO:0015914	other terms
GO:0019433	other terms
GO:0019835	other terms
GO:0034378	other terms
GO:0038063	ECM
GO:0042060	other terms
GO:0043687	other terms
GO:0043691	other terms
GO:0045916	other terms
GO:0050817	other terms
GO:0051006	other terms
GO:0051346	other terms
GO:0051919	other terms
GO:0061041	other terms
GO:0070527	other terms
GO:0071830	other terms
GO:0090303	other terms
GO:0098869	other terms
GO:0098883	other terms
GO:1900025	SKEL
GO:1904729	other terms
GO:2000427	other terms
GO:0001652	other terms
GO:0002102	SKEL
GO:0005587	ECM
GO:0030669	other terms
GO:0031232	other terms
GO:0044216	other terms
GO:0046930	other terms
GO:0097513	MUSC
GO:0098643	ECM
GO:0001848	other terms
GO:0003779	SKEL
GO:0004064	other terms
GO:0004089	other terms
GO:0016209	other terms
GO:0031210	other terms
GO:0035374	SKEL
GO:0043395	other terms
GO:0050750	other terms
GO:0061135	other terms
GO:0090482	MET
GO:0002181	PROT
GO:0019080	PROT
GO:0030017	MUSC
GO:0006364	PROT
GO:0005739	MET
GO:0030018	SKEL
GO:0034114	other terms
GO:0022613	PROT
GO:0045277	MET
GO:0072594	PROT
GO:0042254	PROT
GO:1904667	PROT
GO:0030126	PROT
GO:0042834	other terms
GO:0043178	other terms
GO:0051180	other terms
GO:0050766	other terms
GO:0006105	MET
GO:0034655	PROT
GO:1900024	other terms
GO:1902415	PROT
GO:0034116	other terms
GO:0050839	ECM
GO:0070180	PROT

## Sheet: REVIGO_summary.csv
Results of REVIGO summary of GO term enrichment analysis.
term_ID	description	frequency	plot_size	uniqueness	dispensability	representative	eliminated	comparison
GO:0031012	extracellular matrix	0.0277	2.711	0.863	0	31012	0	ASvCON
GO:0031838	haptoglobin-hemoglobin complex	0.0002	0.602	0.784	0	31838	0	ASvCON
GO:0044217	other organism part	0.0008	1.176	0.962	0	44217	0	ASvCON
GO:0044307	dendritic branch	0.0001	0.301	0.96	0	44307	0	ASvCON
GO:0070469	respiratory chain	0.0054	2	0.935	0	70469	0	ASvCON
GO:0005788	endoplasmic reticulum lumen	0.011	2.312	0.859	0.002	5788	0	ASvCON
GO:0014731	spectrin-associated cytoskeleton	0.0004	0.954	0.835	0.023	14731	0	ASvCON
GO:0019866	organelle inner membrane	0.0299	2.744	0.805	0.1	19866	0	ASvCON
GO:1990204	oxidoreductase complex	0.0057	2.029	0.775	0.138	1990204	0	ASvCON
GO:0017101	aminoacyl-tRNA synthetase multienzyme complex	0.0007	1.114	0.763	0.185	17101	0	ASvCON
GO:0005593	FACIT collagen trimer	0.0003	0.845	0.729	0.193	5593	0	ASvCON
GO:0005579	membrane attack complex	0.0004	0.903	0.738	0.195	5579	0	ASvCON
GO:0043292	contractile fiber	0.0118	2.34	0.725	0.199	43292	0	ASvCON
GO:0071953	elastic fiber	0.0002	0.699	0.82	0.203	71953	0	ASvCON
GO:0005583	fibrillar collagen trimer	0.0007	1.114	0.6	0.794	71953	1	ASvCON
GO:0005588	collagen type V trimer	0.0002	0.602	0.627	0.913	71953	1	ASvCON
GO:0005604	basement membrane	0.005	1.973	0.793	0.73	71953	1	ASvCON
GO:0098644	complex of collagen trimers	0.0011	1.322	0.622	0.827	71953	1	ASvCON
GO:0005852	eukaryotic translation initiation factor 3 complex	0.001	1.279	0.742	0.208	5852	0	ASvCON
GO:0005832	chaperonin-containing T-complex	0.0007	1.146	0.696	0.209	5832	0	ASvCON
GO:0031091	platelet alpha granule	0.0049	1.964	0.855	0.232	31091	0	ASvCON
GO:0005759	mitochondrial matrix	0.0235	2.639	0.765	0.237	5759	0	ASvCON
GO:0005743	mitochondrial inner membrane	0.0267	2.694	0.737	0.75	5759	1	ASvCON
GO:0005746	mitochondrial respiratory chain	0.005	1.968	0.716	0.763	5759	1	ASvCON
GO:0005747	mitochondrial respiratory chain complex I	0.0027	1.699	0.574	0.926	5759	1	ASvCON
GO:0098800	inner mitochondrial membrane protein complex	0.007	2.114	0.57	0.865	5759	1	ASvCON
GO:0098803	respiratory chain complex	0.0046	1.934	0.659	0.974	5759	1	ASvCON
GO:0005581	collagen trimer	0.0048	1.954	0.738	0.242	5581	0	ASvCON
GO:0005840	ribosome	0.0133	2.393	0.623	0.277	5840	0	ASvCON
GO:0001725	stress fiber	0.0029	1.732	0.753	0.289	1725	0	ASvCON
GO:0072562	blood microparticle	0.0104	2.288	0.833	0.3	72562	0	ASvCON
GO:0071682	endocytic vesicle lumen	0.001	1.279	0.843	0.309	71682	0	ASvCON
GO:0034365	discoidal high-density lipoprotein particle	0.0001	0.477	0.705	0.33	34365	0	ASvCON
GO:0042627	chylomicron	0.0007	1.146	0.678	0.823	34365	1	ASvCON
GO:0034363	intermediate-density lipoprotein particle	0.0002	0.699	0.697	0.703	34365	1	ASvCON
GO:0034364	high-density lipoprotein particle	0.0014	1.431	0.666	0.893	34365	1	ASvCON
GO:0034366	spherical high-density lipoprotein particle	0.0004	0.954	0.685	0.777	34365	1	ASvCON
GO:0005577	fibrinogen complex	0.0005	1	0.713	0.371	5577	0	ASvCON
GO:0005862	muscle thin filament tropomyosin	0.0002	0.699	0.723	0.507	5862	0	ASvCON
GO:0031089	platelet dense granule lumen	0.0008	1.176	0.837	0.558	31089	0	ASvCON
GO:0005859	muscle myosin complex	0.0015	1.447	0.584	0.596	5859	0	ASvCON
GO:0016460	myosin II complex	0.0018	1.531	0.616	0.86	5859	1	ASvCON
GO:0015935	small ribosomal subunit	0.004	1.869	0.609	0.607	15935	0	ASvCON
GO:0015934	large ribosomal subunit	0.0065	2.086	0.596	0.889	15935	1	ASvCON
GO:0044391	ribosomal subunit	0.0104	2.288	0.587	0.889	15935	1	ASvCON
GO:0022626	cytosolic ribosome	0.0065	2.086	0.588	0.807	15935	1	ASvCON
GO:0022625	cytosolic large ribosomal subunit	0.0036	1.826	0.594	0.861	15935	1	ASvCON
GO:0022627	cytosolic small ribosomal subunit	0.0025	1.681	0.603	0.785	15935	1	ASvCON
GO:0032432	actin filament bundle	0.0032	1.785	0.751	0.625	32432	0	ASvCON
GO:0031093	platelet alpha granule lumen	0.0036	1.833	0.823	0.628	31093	0	ASvCON
GO:0005589	collagen type VI trimer	0.0002	0.602	0.701	0.634	5589	0	ASvCON
GO:0042641	actomyosin	0.0035	1.82	0.75	0.637	42641	0	ASvCON
GO:0098798	mitochondrial protein complex	0.0082	2.185	0.628	0.647	98798	0	ASvCON
GO:0030055	cell-substrate junction	0.0217	2.604	0.952	0	30055	0	MRvCON
GO:0031012	extracellular matrix	0.0277	2.711	0.846	0	31012	0	MRvCON
GO:0031838	haptoglobin-hemoglobin complex	0.0002	0.602	0.829	0	31838	0	MRvCON
GO:0031983	vesicle lumen	0.0181	2.526	0.846	0	31983	0	MRvCON
GO:0070469	respiratory chain	0.0054	2	0.919	0	70469	0	MRvCON
GO:0098647	collagen beaded filament	0.0002	0.602	0.858	0	98647	0	MRvCON
GO:0014731	spectrin-associated cytoskeleton	0.0004	0.954	0.846	0.016	14731	0	MRvCON
GO:0042383	sarcolemma	0.0064	2.076	0.904	0.065	42383	0	MRvCON
GO:0005743	mitochondrial inner membrane	0.0267	2.694	0.775	0.099	5743	0	MRvCON
GO:0098800	inner mitochondrial membrane protein complex	0.007	2.114	0.635	0.793	5743	1	MRvCON
GO:0019866	organelle inner membrane	0.0299	2.744	0.816	0.731	5743	1	MRvCON
GO:0070069	cytochrome complex	0.0019	1.556	0.809	0.198	70069	0	MRvCON
GO:0071953	elastic fiber	0.0002	0.699	0.83	0.203	71953	0	MRvCON
GO:0005579	membrane attack complex	0.0004	0.903	0.756	0.21	5579	0	MRvCON
GO:0005788	endoplasmic reticulum lumen	0.011	2.312	0.842	0.23	5788	0	MRvCON
GO:0031091	platelet alpha granule	0.0049	1.964	0.805	0.245	31091	0	MRvCON
GO:0005581	collagen trimer	0.0048	1.954	0.799	0.256	5581	0	MRvCON
GO:0097517	contractile actin filament bundle	0.0029	1.732	0.773	0.289	97517	0	MRvCON
GO:0072562	blood microparticle	0.0104	2.288	0.806	0.3	72562	0	MRvCON
GO:0071682	endocytic vesicle lumen	0.001	1.279	0.793	0.309	71682	0	MRvCON
GO:0031093	platelet alpha granule lumen	0.0036	1.833	0.768	0.814	71682	1	MRvCON
GO:0034774	secretory granule lumen	0.0172	2.504	0.747	0.717	71682	1	MRvCON
GO:0034365	discoidal high-density lipoprotein particle	0.0001	0.477	0.707	0.33	34365	0	MRvCON
GO:0042627	chylomicron	0.0007	1.146	0.683	0.823	34365	1	MRvCON
GO:0034363	intermediate-density lipoprotein particle	0.0002	0.699	0.7	0.703	34365	1	MRvCON
GO:0034364	high-density lipoprotein particle	0.0014	1.431	0.673	0.893	34365	1	MRvCON
GO:0034366	spherical high-density lipoprotein particle	0.0004	0.954	0.688	0.777	34365	1	MRvCON
GO:0030863	cortical cytoskeleton	0.0045	1.924	0.772	0.348	30863	0	MRvCON
GO:0008091	spectrin	0.0004	0.954	0.756	0.755	30863	1	MRvCON
GO:0005577	fibrinogen complex	0.0005	1	0.744	0.371	5577	0	MRvCON
GO:0030016	myofibril	0.0113	2.32	0.728	0.436	30016	0	MRvCON
GO:0043034	costamere	0.001	1.301	0.754	0.772	30016	1	MRvCON
GO:0098803	respiratory chain complex	0.0046	1.934	0.747	0.482	98803	0	MRvCON
GO:0031089	platelet dense granule lumen	0.0008	1.176	0.786	0.558	31089	0	MRvCON
GO:0016010	dystrophin-associated glycoprotein complex	0.0011	1.342	0.742	0.583	16010	0	MRvCON
GO:0016460	myosin II complex	0.0018	1.531	0.657	0.595	16460	0	MRvCON
GO:0001527	microfibril	0.0005	1.041	0.748	0.628	1527	0	MRvCON
GO:0042641	actomyosin	0.0035	1.82	0.771	0.63	42641	0	MRvCON
GO:0043292	contractile fiber	0.0118	2.34	0.739	0.645	43292	0	MRvCON
GO:0098798	mitochondrial protein complex	0.0082	2.185	0.703	0.656	98798	0	MRvCON
GO:0005583	fibrillar collagen trimer	0.0007	1.114	0.662	0.675	5583	0	MRvCON
