# Supplementary material for: Disease- and sex-specific differences in patients with heart valve disease: a proteome study
Source: Life Sci Alliance. 2023 Jan 10;6(3):e202201411. doi: 10.26508/lsa.202201411 (PMC9834574; doi:10.26508/lsa.202201411)
Supplement: Supplementary file 5 [file LSA-2022-01411_TableS5.xlsx]

## Sheet: proteinGroups_isoforms.tsv
List of proteins, for which more than one isoform was quantified.
Protein.IDs	Majority.protein.IDs	Peptide.counts..all.	Peptide.counts..razor.unique.	Peptide.counts..unique.	Protein.names	Gene.names	Fasta.headers	Number.of.proteins	Peptides	Razor...unique.peptides	Unique.peptides
O14639-5;O14639-3;O14639-4;J3QSX6;H0Y7N6;F6XFR5	O14639-5;O14639-3;O14639-4;J3QSX6	38;36;33;32;13;13	2;2;2;2;2;2	2;2;2;2;2;2		ABLIM1	sp|O14639-5|ABLM1_HUMAN Isoform 5 of Actin-binding LIM protein 1 OS=Homo sapiens OX=9606 GN=ABLIM1;sp|O14639-3|ABLM1_HUMAN Isoform 3 of Actin-binding LIM protein 1 OS=Homo sapiens OX=9606 GN=ABLIM1;sp|O14639-4|ABLM1_HUMAN Isoform 4 of Actin-binding LIM pro	6	38	2	2
O14639-6	O14639-6	62	62	1		ABLIM1	sp|O14639-6|ABLM1_HUMAN Isoform 6 of Actin-binding LIM protein 1 OS=Homo sapiens OX=9606 GN=ABLIM1	1	62	62	1
P05091;S4R3S4	P05091	36;9	36;9	0;0	Aldehyde dehydrogenase, mitochondrial	ALDH2	sp|P05091|ALDH2_HUMAN Aldehyde dehydrogenase, mitochondrial OS=Homo sapiens OX=9606 GN=ALDH2 PE=1 SV=2	2	36	36	0
P05091-2	P05091-2	29	1	1	Aldehyde dehydrogenase, mitochondrial	ALDH2	sp|P05091-2|ALDH2_HUMAN Isoform 2 of Aldehyde dehydrogenase, mitochondrial OS=Homo sapiens OX=9606 GN=ALDH2	1	29	1	1
A0A0A0MRN9;Q5T457	A0A0A0MRN9;Q5T457	26;23	1;1	1;1		ANKRD2	tr|A0A0A0MRN9|A0A0A0MRN9_HUMAN Ankyrin repeat domain-containing protein 2 OS=Homo sapiens OX=9606 GN=ANKRD2 PE=1 SV=1;tr|Q5T457|Q5T457_HUMAN Ankyrin repeat domain-containing protein 2 OS=Homo sapiens OX=9606 GN=ANKRD2 PE=1 SV=1	2	26	1	1
Q9GZV1;Q9GZV1-2	Q9GZV1;Q9GZV1-2	27;24	27;24	2;2	Ankyrin repeat domain-containing protein 2	ANKRD2	sp|Q9GZV1|ANKR2_HUMAN Ankyrin repeat domain-containing protein 2 OS=Homo sapiens OX=9606 GN=ANKRD2 PE=1 SV=3;sp|Q9GZV1-2|ANKR2_HUMAN Isoform 2 of Ankyrin repeat domain-containing protein 2 OS=Homo sapiens OX=9606 GN=ANKRD2	2	27	27	2
E5RK69;H0YC77	E5RK69	34;3	1;0	1;0	Annexin	ANXA6	tr|E5RK69|E5RK69_HUMAN Annexin OS=Homo sapiens OX=9606 GN=ANXA6 PE=1 SV=1	2	34	1	1
P08133;P08133-2;E7EMC6;E5RK63;E5RJF5;E5RFF0;E5RI05;E5RJR0;E5RIU8	P08133;P08133-2;E7EMC6	52;51;28;11;10;10;9;7;6	52;51;28;11;10;10;9;7;6	19;19;1;8;7;3;5;3;2	Annexin A6;Annexin	ANXA6	sp|P08133|ANXA6_HUMAN Annexin A6 OS=Homo sapiens OX=9606 GN=ANXA6 PE=1 SV=3;sp|P08133-2|ANXA6_HUMAN Isoform 2 of Annexin A6 OS=Homo sapiens OX=9606 GN=ANXA6;tr|E7EMC6|E7EMC6_HUMAN Annexin OS=Homo sapiens OX=9606 GN=ANXA6 PE=1 SV=1	9	52	52	19
J3KQL8	J3KQL8	15	1	1		APOL2	tr|J3KQL8|J3KQL8_HUMAN Apolipoprotein L2 OS=Homo sapiens OX=9606 GN=APOL2 PE=1 SV=2	1	15	1	1
Q9BQE5;E9PM95;B0QYK8	Q9BQE5;E9PM95	15;9;7	15;9;7	1;1;1	Apolipoprotein L2	APOL2	sp|Q9BQE5|APOL2_HUMAN Apolipoprotein L2 OS=Homo sapiens OX=9606 GN=APOL2 PE=1 SV=1;tr|E9PM95|E9PM95_HUMAN Apolipoprotein L2 (Fragment) OS=Homo sapiens OX=9606 GN=APOL2 PE=1 SV=1	3	15	15	1
A0A1W2PNV4;E9PF58	A0A1W2PNV4;E9PF58	31;16	31;16	0;0		ARPC1A	tr|A0A1W2PNV4|A0A1W2PNV4_HUMAN Uncharacterized protein OS=Homo sapiens OX=9606 PE=4 SV=1;tr|E9PF58|E9PF58_HUMAN Actin-related protein 2/3 complex subunit 1A OS=Homo sapiens OX=9606 GN=ARPC1A PE=1 SV=1	2	31	31	0
Q92747;Q92747-2	Q92747;Q92747-2	22;17	4;3	4;3	Actin-related protein 2/3 complex subunit 1A	ARPC1A	sp|Q92747|ARC1A_HUMAN Actin-related protein 2/3 complex subunit 1A OS=Homo sapiens OX=9606 GN=ARPC1A PE=2 SV=2;sp|Q92747-2|ARC1A_HUMAN Isoform 2 of Actin-related protein 2/3 complex subunit 1A OS=Homo sapiens OX=9606 GN=ARPC1A	2	22	4	4
Q12797;Q12797-10;A0A087WW51;E5RHK2;A0A087WUJ2;E5RG56;Q12797-6;Q12797-11;Q12797-2;E5RHJ2;E5RG29;Q12797-7;Q12797-9;Q12797-5;Q12797-8	Q12797;Q12797-10	27;26;5;2;2;2;2;2;2;1;1;1;1;1;1	27;26;5;2;2;2;2;2;2;1;1;1;1;1;1	27;26;5;2;2;2;2;2;2;1;1;1;1;1;1	Aspartyl/asparaginyl beta-hydroxylase	ASPH	sp|Q12797|ASPH_HUMAN Aspartyl/asparaginyl beta-hydroxylase OS=Homo sapiens OX=9606 GN=ASPH PE=1 SV=3;sp|Q12797-10|ASPH_HUMAN Isoform 10 of Aspartyl/asparaginyl beta-hydroxylase OS=Homo sapiens OX=9606 GN=ASPH	15	27	27	27
Q12797-4;Q12797-3	Q12797-4;Q12797-3	2;2	2;2	2;2	Aspartyl/asparaginyl beta-hydroxylase	ASPH	sp|Q12797-4|ASPH_HUMAN Isoform 4 of Aspartyl/asparaginyl beta-hydroxylase OS=Homo sapiens OX=9606 GN=ASPH;sp|Q12797-3|ASPH_HUMAN Isoform 3 of Aspartyl/asparaginyl beta-hydroxylase OS=Homo sapiens OX=9606 GN=ASPH	2	2	2	2
P16615;P16615-5;P16615-4;H7C5W9;J3QSY6;H3BVB2;H3BTW4	P16615;P16615-5;P16615-4;H7C5W9	59;57;54;49;3;2;1	59;57;54;49;3;2;1	2;0;2;2;0;0;0	Sarcoplasmic/endoplasmic reticulum calcium ATPase 2	ATP2A2	sp|P16615|AT2A2_HUMAN Sarcoplasmic/endoplasmic reticulum calcium ATPase 2 OS=Homo sapiens OX=9606 GN=ATP2A2 PE=1 SV=1;sp|P16615-5|AT2A2_HUMAN Isoform 5 of Sarcoplasmic/endoplasmic reticulum calcium ATPase 2 OS=Homo sapiens OX=9606 GN=ATP2A2;sp|P16615-4|AT2	7	59	59	2
P16615-2	P16615-2	58	1	1	Sarcoplasmic/endoplasmic reticulum calcium ATPase 2	ATP2A2	sp|P16615-2|AT2A2_HUMAN Isoform 2 of Sarcoplasmic/endoplasmic reticulum calcium ATPase 2 OS=Homo sapiens OX=9606 GN=ATP2A2	1	58	1	1
P16615-3;A0A0C4DH86	P16615-3	58;2	1;1	1;1	Sarcoplasmic/endoplasmic reticulum calcium ATPase 2	ATP2A2	sp|P16615-3|AT2A2_HUMAN Isoform 3 of Sarcoplasmic/endoplasmic reticulum calcium ATPase 2 OS=Homo sapiens OX=9606 GN=ATP2A2	2	58	1	1
P23634;P23634-6;P23634-8;P23634-7;Q01814-4;A0A2U3U055;Q01814-7;Q01814-3;A0A2U3TZI3;Q01814-2;H7BZS8	P23634;P23634-6;P23634-8;P23634-7	45;44;44;43;10;10;10;10;10;10;2	45;44;44;43;10;10;10;10;10;10;2	3;3;3;3;0;0;0;0;0;0;0	Plasma membrane calcium-transporting ATPase 4	ATP2B4	sp|P23634|AT2B4_HUMAN Plasma membrane calcium-transporting ATPase 4 OS=Homo sapiens OX=9606 GN=ATP2B4 PE=1 SV=2;sp|P23634-6|AT2B4_HUMAN Isoform XB of Plasma membrane calcium-transporting ATPase 4 OS=Homo sapiens OX=9606 GN=ATP2B4;sp|P23634-8|AT2B4_HUMAN Is	11	45	45	3
P23634-4;P23634-2;P23634-5;P23634-3;H0YDG5;H7BY13	P23634-4;P23634-2;P23634-5;P23634-3	43;43;42;42;4;4	1;1;1;1;1;1	1;1;1;1;1;1	Plasma membrane calcium-transporting ATPase 4	ATP2B4	sp|P23634-4|AT2B4_HUMAN Isoform XK of Plasma membrane calcium-transporting ATPase 4 OS=Homo sapiens OX=9606 GN=ATP2B4;sp|P23634-2|AT2B4_HUMAN Isoform XA of Plasma membrane calcium-transporting ATPase 4 OS=Homo sapiens OX=9606 GN=ATP2B4;sp|P23634-5|AT2B4_HU	6	43	1	1
P25705;P25705-3;K7ENJ4;K7ERX7;K7ESA0	P25705;P25705-3	51;44;21;17;2	1;1;0;1;1	1;1;0;1;1	ATP synthase subunit alpha, mitochondrial	ATP5F1A	sp|P25705|ATPA_HUMAN ATP synthase subunit alpha, mitochondrial OS=Homo sapiens OX=9606 GN=ATP5F1A PE=1 SV=1;sp|P25705-3|ATPA_HUMAN Isoform 3 of ATP synthase subunit alpha, mitochondrial OS=Homo sapiens OX=9606 GN=ATP5F1A	5	51	1	1
P25705-2;K7EK77;K7EJP1;K7EQH4	P25705-2;K7EK77	52;27;16;10	52;27;16;10	2;2;2;2	ATP synthase subunit alpha, mitochondrial	ATP5F1A	sp|P25705-2|ATPA_HUMAN Isoform 2 of ATP synthase subunit alpha, mitochondrial OS=Homo sapiens OX=9606 GN=ATP5F1A;tr|K7EK77|K7EK77_HUMAN ATP synthase subunit alpha, mitochondrial (Fragment) OS=Homo sapiens OX=9606 GN=ATP5F1A PE=1 SV=1	4	52	52	2
G3V126;H0YB41	G3V126	17;2	17;2	1;0		ATP6V1H	tr|G3V126|G3V126_HUMAN V-type proton ATPase subunit H OS=Homo sapiens OX=9606 GN=ATP6V1H PE=1 SV=1	2	17	17	1
Q9UI12-2;Q9UI12;E5RG49;E5RHH0;E5RK31;E5RJG1	Q9UI12-2;Q9UI12	17;17;3;3;1;1	1;1;1;1;1;1	1;1;1;1;1;1	V-type proton ATPase subunit H	ATP6V1H	sp|Q9UI12-2|VATH_HUMAN Isoform 2 of V-type proton ATPase subunit H OS=Homo sapiens OX=9606 GN=ATP6V1H;sp|Q9UI12|VATH_HUMAN V-type proton ATPase subunit H OS=Homo sapiens OX=9606 GN=ATP6V1H PE=1 SV=1	6	17	1	1
P54289;P54289-5;H0Y715	P54289;P54289-5	49;48;14	49;48;14	1;0;1	Voltage-dependent calcium channel subunit alpha-2/delta-1;Voltage-dependent calcium channel subunit alpha-2-1;Voltage-dependent calcium channel subunit delta-1	CACNA2D1	sp|P54289|CA2D1_HUMAN Voltage-dependent calcium channel subunit alpha-2/delta-1 OS=Homo sapiens OX=9606 GN=CACNA2D1 PE=1 SV=3;sp|P54289-5|CA2D1_HUMAN Isoform 5 of Voltage-dependent calcium channel subunit alpha-2/delta-1 OS=Homo sapiens OX=9606 GN=CACNA2D1	3	49	49	1
P54289-3	P54289-3	48	2	0	Voltage-dependent calcium channel subunit alpha-2/delta-1;Voltage-dependent calcium channel subunit alpha-2-1;Voltage-dependent calcium channel subunit delta-1	CACNA2D1	sp|P54289-3|CA2D1_HUMAN Isoform 3 of Voltage-dependent calcium channel subunit alpha-2/delta-1 OS=Homo sapiens OX=9606 GN=CACNA2D1	1	48	2	0
E7EQ12;D6RC54;D6RAA8	E7EQ12	29;10;8	2;2;2	2;2;2		CAST	tr|E7EQ12|E7EQ12_HUMAN Calpastatin OS=Homo sapiens OX=9606 GN=CAST PE=1 SV=1	3	29	2	2
P20810-6;P20810-7;A0A0C4DGB5;P20810-10;P20810-9;P20810-5;A0A0A0MR45;E7EQA0;H0YD33;F8W7E0;H0YA91;E9PSG1;D6RGF7;E7EN75;D6RBR1	P20810-6;P20810-7;A0A0C4DGB5;P20810-10;P20810-9;P20810-5;A0A0A0MR45;E7EQA0;H0YD33	48;47;46;46;45;42;26;26;26;17;16;14;8;8;7	48;47;46;46;45;42;26;26;26;17;16;14;8;8;7	0;0;0;0;0;0;0;0;0;0;0;0;0;0;0	Calpastatin	CAST	sp|P20810-6|ICAL_HUMAN Isoform 6 of Calpastatin OS=Homo sapiens OX=9606 GN=CAST;sp|P20810-7|ICAL_HUMAN Isoform 7 of Calpastatin OS=Homo sapiens OX=9606 GN=CAST;tr|A0A0C4DGB5|A0A0C4DGB5_HUMAN Calpastatin OS=Homo sapiens OX=9606 GN=CAST PE=1 SV=1;sp|P20810-1	15	48	48	0
E3W994;J3KR49;A0A0U1RQI6;O75122;B3KR06;E7ENG2;O75122-2;D6RBU8;C9J668;H7C5M8;H7C4X8;H7C4I5;H7C4M5	E3W994;J3KR49;A0A0U1RQI6;O75122	50;49;49;49;19;19;19;10;8;8;7;5;2	1;1;0;1;0;0;0;0;0;0;0;0;0	1;1;0;1;0;0;0;0;0;0;0;0;0	CLIP-associating protein 2	CLASP2	tr|E3W994|E3W994_HUMAN CLIP-associating protein 2 OS=Homo sapiens OX=9606 GN=CLASP2 PE=1 SV=2;tr|J3KR49|J3KR49_HUMAN CLIP-associating protein 2 OS=Homo sapiens OX=9606 GN=CLASP2 PE=1 SV=1;tr|A0A0U1RQI6|A0A0U1RQI6_HUMAN CLIP-associating protein 2 OS=Homo sa	13	50	1	1
E7ERI8;E7EW49;O75122-3	E7ERI8;E7EW49;O75122-3	54;54;54	47;47;47	5;5;5	CLIP-associating protein 2	CLASP2	tr|E7ERI8|E7ERI8_HUMAN CLIP-associating protein 2 OS=Homo sapiens OX=9606 GN=CLASP2 PE=1 SV=1;tr|E7EW49|E7EW49_HUMAN CLIP-associating protein 2 OS=Homo sapiens OX=9606 GN=CLASP2 PE=1 SV=1;sp|O75122-3|CLAP2_HUMAN Isoform 3 of CLIP-associating protein 2 OS=H	3	54	47	5
E7ENL6;P12111-4	E7ENL6;P12111-4	165;165	2;2	0;0	Collagen alpha-3(VI) chain	COL6A3	tr|E7ENL6|E7ENL6_HUMAN Collagen alpha-3(VI) chain OS=Homo sapiens OX=9606 GN=COL6A3 PE=1 SV=2;sp|P12111-4|CO6A3_HUMAN Isoform 4 of Collagen alpha-3(VI) chain OS=Homo sapiens OX=9606 GN=COL6A3	2	165	2	0
P12111;P12111-2;P12111-5;P12111-3;I3L392	P12111;P12111-2	190;184;83;71;9	190;184;83;71;9	9;9;9;9;0	Collagen alpha-3(VI) chain	COL6A3	sp|P12111|CO6A3_HUMAN Collagen alpha-3(VI) chain OS=Homo sapiens OX=9606 GN=COL6A3 PE=1 SV=5;sp|P12111-2|CO6A3_HUMAN Isoform 2 of Collagen alpha-3(VI) chain OS=Homo sapiens OX=9606 GN=COL6A3	5	190	190	9
J3KSS5;Q6QEF8-4;Q6QEF8-3;J3QRV4;K7ERF4	J3KSS5;Q6QEF8-4;Q6QEF8-3	11;6;6;5;2	2;2;2;0;0	2;2;2;0;0	Coronin;Coronin-6	CORO6	tr|J3KSS5|J3KSS5_HUMAN Coronin OS=Homo sapiens OX=9606 GN=CORO6 PE=1 SV=1;sp|Q6QEF8-4|CORO6_HUMAN Isoform 4 of Coronin-6 OS=Homo sapiens OX=9606 GN=CORO6;sp|Q6QEF8-3|CORO6_HUMAN Isoform 3 of Coronin-6 OS=Homo sapiens OX=9606 GN=CORO6	5	11	2	2
Q6QEF8-5;J3QLV6;Q6QEF8;Q6QEF8-2	Q6QEF8-5;J3QLV6;Q6QEF8	13;10;10;5	11;8;8;3	4;1;1;1	Coronin-6;Coronin	CORO6	sp|Q6QEF8-5|CORO6_HUMAN Isoform 5 of Coronin-6 OS=Homo sapiens OX=9606 GN=CORO6;tr|J3QLV6|J3QLV6_HUMAN Coronin OS=Homo sapiens OX=9606 GN=CORO6 PE=1 SV=1;sp|Q6QEF8|CORO6_HUMAN Coronin-6 OS=Homo sapiens OX=9606 GN=CORO6 PE=1 SV=2	4	13	11	4
A0A0J9YX62;O75190-3;C9J2C4;C9J2P2;C9JDX6;F8WCZ4;C9JDR7;C9JB42;C9JN01;Q8WWF6;Q8NHS0;Q7Z6W7	A0A0J9YX62;O75190-3;C9J2C4;C9J2P2	15;15;11;9;7;7;6;5;4;2;2;1	15;15;11;9;7;7;6;5;4;2;2;1	2;2;0;0;0;0;0;0;0;0;0;0	DnaJ homolog subfamily B member 6	DNAJB6	tr|A0A0J9YX62|A0A0J9YX62_HUMAN DnaJ homolog subfamily B member 6 OS=Homo sapiens OX=9606 GN=DNAJB6 PE=1 SV=1;sp|O75190-3|DNJB6_HUMAN Isoform C of DnaJ homolog subfamily B member 6 OS=Homo sapiens OX=9606 GN=DNAJB6;tr|C9J2C4|C9J2C4_HUMAN DnaJ homolog subfam	12	15	15	2
O75190;E9PH18;O75190-4	O75190;E9PH18;O75190-4	14;9;9	1;1;1	1;1;1	DnaJ homolog subfamily B member 6	DNAJB6	sp|O75190|DNJB6_HUMAN DnaJ homolog subfamily B member 6 OS=Homo sapiens OX=9606 GN=DNAJB6 PE=1 SV=2;tr|E9PH18|E9PH18_HUMAN DnaJ homolog subfamily B member 6 OS=Homo sapiens OX=9606 GN=DNAJB6 PE=1 SV=1;sp|O75190-4|DNJB6_HUMAN Isoform D of DnaJ homolog subfa	3	14	1	1
O00429;O00429-3;O00429-5;O00429-7;F8VZ52;B4DDQ3;B4DPZ9;F8W1W3;F8VR28;H0YHY4	O00429;O00429-3;O00429-5;O00429-7	56;55;54;37;24;13;12;11;6;3	56;55;54;37;24;13;12;11;6;3	0;0;0;0;0;0;0;0;0;0	Dynamin-1-like protein	DNM1L	sp|O00429|DNM1L_HUMAN Dynamin-1-like protein OS=Homo sapiens OX=9606 GN=DNM1L PE=1 SV=2;sp|O00429-3|DNM1L_HUMAN Isoform 2 of Dynamin-1-like protein OS=Homo sapiens OX=9606 GN=DNM1L;sp|O00429-5|DNM1L_HUMAN Isoform 5 of Dynamin-1-like protein OS=Homo sapiens	10	56	56	0
O00429-2;O00429-4	O00429-2;O00429-4	56;55	1;1	0;0	Dynamin-1-like protein	DNM1L	sp|O00429-2|DNM1L_HUMAN Isoform 4 of Dynamin-1-like protein OS=Homo sapiens OX=9606 GN=DNM1L;sp|O00429-4|DNM1L_HUMAN Isoform 3 of Dynamin-1-like protein OS=Homo sapiens OX=9606 GN=DNM1L	2	56	1	0
P50570-2;P50570;P50570-5;K7EPK9;K7ENE7;H7C5U0	P50570-2;P50570;P50570-5	42;41;40;3;2;1	1;1;1;0;0;0	1;1;1;0;0;0	Dynamin-2	DNM2	sp|P50570-2|DYN2_HUMAN Isoform 2 of Dynamin-2 OS=Homo sapiens OX=9606 GN=DNM2;sp|P50570|DYN2_HUMAN Dynamin-2 OS=Homo sapiens OX=9606 GN=DNM2 PE=1 SV=2;sp|P50570-5|DYN2_HUMAN Isoform 5 of Dynamin-2 OS=Homo sapiens OX=9606 GN=DNM2	6	42	1	1
P50570-3;P50570-4;K7EMQ3	P50570-3;P50570-4	43;42;16	43;42;16	1;1;1	Dynamin-2	DNM2	sp|P50570-3|DYN2_HUMAN Isoform 3 of Dynamin-2 OS=Homo sapiens OX=9606 GN=DNM2;sp|P50570-4|DYN2_HUMAN Isoform 4 of Dynamin-2 OS=Homo sapiens OX=9606 GN=DNM2	3	43	43	1
Q9Y4J8;Q9Y4J8-3;Q9Y4J8-12;K7ERZ2;K7EJ84;M0R0C4;K7ENJ7;K7ESB2;K7EIV1;K7EMN1	Q9Y4J8;Q9Y4J8-3	43;34;20;8;7;6;4;3;2;2	43;34;20;8;7;6;4;3;2;2	0;0;0;0;0;0;0;0;0;0	Dystrobrevin alpha	DTNA	sp|Q9Y4J8|DTNA_HUMAN Dystrobrevin alpha OS=Homo sapiens OX=9606 GN=DTNA PE=1 SV=2;sp|Q9Y4J8-3|DTNA_HUMAN Isoform 3 of Dystrobrevin alpha OS=Homo sapiens OX=9606 GN=DTNA	10	43	43	0
Q9Y4J8-15;Q9Y4J8-13;Q9Y4J8-14;Q9Y4J8-2;Q9Y4J8-16;Q9Y4J8-5;M0QZ28;Q9Y4J8-8;M0R021;K7ERH7;K7ER73	Q9Y4J8-15;Q9Y4J8-13;Q9Y4J8-14;Q9Y4J8-2;Q9Y4J8-16;Q9Y4J8-5;M0QZ28	43;42;42;40;33;31;24;15;12;8;6	5;4;4;2;4;2;4;4;4;2;1	3;2;2;2;2;2;2;2;2;2;0	Dystrobrevin alpha	DTNA	sp|Q9Y4J8-15|DTNA_HUMAN Isoform 15 of Dystrobrevin alpha OS=Homo sapiens OX=9606 GN=DTNA;sp|Q9Y4J8-13|DTNA_HUMAN Isoform 13 of Dystrobrevin alpha OS=Homo sapiens OX=9606 GN=DTNA;sp|Q9Y4J8-14|DTNA_HUMAN Isoform 14 of Dystrobrevin alpha OS=Homo sapiens OX=96	11	43	5	3
P29692;P29692-4;E9PQZ1;E9PK01;E9PI39;E9PQ49;E9PPR1;E9PL12;E9PMW7;E9PK06;E9PK72;E9PKK3;E9PNW6;E9PJD0	P29692;P29692-4;E9PQZ1;E9PK01;E9PI39	17;14;13;12;9;8;7;7;6;4;3;2;1;1	17;14;13;12;9;8;7;7;6;4;3;2;1;1	0;0;0;0;0;0;0;0;0;0;0;0;0;0	Elongation factor 1-delta	EEF1D	sp|P29692|EF1D_HUMAN Elongation factor 1-delta OS=Homo sapiens OX=9606 GN=EEF1D PE=1 SV=5;sp|P29692-4|EF1D_HUMAN Isoform 4 of Elongation factor 1-delta OS=Homo sapiens OX=9606 GN=EEF1D;tr|E9PQZ1|E9PQZ1_HUMAN Elongation factor 1-delta OS=Homo sapiens OX=960	14	17	17	0
P29692-3;E9PL71;E9PN91	P29692-3;E9PL71	16;8;5	1;1;1	1;1;1	Elongation factor 1-delta	EEF1D	sp|P29692-3|EF1D_HUMAN Isoform 3 of Elongation factor 1-delta OS=Homo sapiens OX=9606 GN=EEF1D;tr|E9PL71|E9PL71_HUMAN Elongation factor 1-delta (Fragment) OS=Homo sapiens OX=9606 GN=EEF1D PE=1 SV=1	3	16	1	1
E7EN65;P15502-2;P15502-1;P15502-4;E7ENM0;F8WAH6;P15502-13;P15502-10;P15502;P15502-9;P15502-7;P15502-6;G3V0G6;P15502-5;P15502-12;B3KRT8;E7ENW7;E7EWS8;E7EN51;H7C3K0	E7EN65;P15502-2;P15502-1;P15502-4;E7ENM0;F8WAH6;P15502-13;P15502-10;P15502;P15502-9;P15502-7;P15502-6;G3V0G6;P15502-5;P15502-12;B3KRT8	15;15;15;15;14;14;14;14;14;14;13;13;12;12;11;9;5;3;3;2	15;15;15;15;14;14;14;14;14;14;13;13;12;12;11;9;5;3;3;2	1;1;1;1;1;0;0;0;0;0;0;0;0;1;0;0;0;0;0;0	Elastin	ELN	tr|E7EN65|E7EN65_HUMAN Elastin OS=Homo sapiens OX=9606 GN=ELN PE=1 SV=1;sp|P15502-2|ELN_HUMAN Isoform 2 of Elastin OS=Homo sapiens OX=9606 GN=ELN;sp|P15502-1|ELN_HUMAN Isoform 1 of Elastin OS=Homo sapiens OX=9606 GN=ELN;sp|P15502-4|ELN_HUMAN Isoform 4 of E	20	15	15	1
G5E950;P15502-11;E7EP82	G5E950	12;5;2	2;1;1	0;0;0		ELN	tr|G5E950|G5E950_HUMAN Elastin (Supravalvular aortic stenosis, Williams-Beuren syndrome), isoform CRA_h OS=Homo sapiens OX=9606 GN=ELN PE=1 SV=1	3	12	2	0
A0A2R8Y6G6;A0A2R8Y798;A0A2R8YEG5	A0A2R8Y6G6	27;3;3	1;0;0	1;0;0		ENO1	tr|A0A2R8Y6G6|A0A2R8Y6G6_HUMAN Alpha-enolase OS=Homo sapiens OX=9606 GN=ENO1 PE=1 SV=1	3	27	1	1
P06733;K7EM90;A0A2R8YEM5;A0A2R8Y879;K7ERS8;A0A2R8Y6I8	P06733	29;12;10;9;5;4	29;12;10;9;5;4	3;3;3;3;2;3	Alpha-enolase	ENO1	sp|P06733|ENOA_HUMAN Alpha-enolase OS=Homo sapiens OX=9606 GN=ENO1 PE=1 SV=2	6	29	29	3
P23142;P23142-2;P23142-3;CON__ENSEMBL:ENSBTAP00000016046;B1AHM7;B1AHM9;B1AHM8;H7C1M6;B1AHN3;B1AHM6;A0A0U1RRA4	P23142;P23142-2;P23142-3	27;17;17;12;6;6;5;5;4;3;1	27;17;17;12;6;6;5;5;4;3;1	10;0;0;6;0;0;0;0;0;0;1	Fibulin-1	FBLN1	sp|P23142|FBLN1_HUMAN Fibulin-1 OS=Homo sapiens OX=9606 GN=FBLN1 PE=1 SV=4;sp|P23142-2|FBLN1_HUMAN Isoform A of Fibulin-1 OS=Homo sapiens OX=9606 GN=FBLN1;sp|P23142-3|FBLN1_HUMAN Isoform B of Fibulin-1 OS=Homo sapiens OX=9606 GN=FBLN1	11	27	27	10
P23142-4;B1AHL2	P23142-4;B1AHL2	24;23	7;7	7;7	Fibulin-1	FBLN1	sp|P23142-4|FBLN1_HUMAN Isoform C of Fibulin-1 OS=Homo sapiens OX=9606 GN=FBLN1;tr|B1AHL2|B1AHL2_HUMAN Fibulin-1 OS=Homo sapiens OX=9606 GN=FBLN1 PE=1 SV=1	2	24	7	7
Q13045;Q13045-3;J3QQQ2;K7EQZ7;J3QLR6;K7EP37;K7EP27;J3QQU5;J3KS39;J3KT47	Q13045;Q13045-3	51;49;12;7;6;5;5;4;2;1	51;49;12;7;6;5;5;4;2;1	1;1;0;0;0;0;0;0;0;0	Protein flightless-1 homolog	FLII	sp|Q13045|FLII_HUMAN Protein flightless-1 homolog OS=Homo sapiens OX=9606 GN=FLII PE=1 SV=2;sp|Q13045-3|FLII_HUMAN Isoform 3 of Protein flightless-1 homolog OS=Homo sapiens OX=9606 GN=FLII	10	51	51	1
Q13045-2	Q13045-2	50	1	0	Protein flightless-1 homolog	FLII	sp|Q13045-2|FLII_HUMAN Isoform 2 of Protein flightless-1 homolog OS=Homo sapiens OX=9606 GN=FLII	1	50	1	0
Q14315	Q14315	219	219	5	Filamin-C	FLNC	sp|Q14315|FLNC_HUMAN Filamin-C OS=Homo sapiens OX=9606 GN=FLNC PE=1 SV=3	1	219	219	5
Q14315-2	Q14315-2	215	1	1	Filamin-C	FLNC	sp|Q14315-2|FLNC_HUMAN Isoform 2 of Filamin-C OS=Homo sapiens OX=9606 GN=FLNC	1	215	1	1
A0A0A0MS51;A0A0A0MT01;P06396-4;Q5T0H8;REV__H0YJM7	A0A0A0MS51;A0A0A0MT01;P06396-4	44;41;41;1;1	3;0;0;0;0	3;0;0;0;0	Gelsolin	GSN	tr|A0A0A0MS51|A0A0A0MS51_HUMAN Gelsolin OS=Homo sapiens OX=9606 GN=GSN PE=1 SV=1;tr|A0A0A0MT01|A0A0A0MT01_HUMAN Gelsolin OS=Homo sapiens OX=9606 GN=GSN PE=1 SV=1;sp|P06396-4|GELS_HUMAN Isoform 4 of Gelsolin OS=Homo sapiens OX=9606 GN=GSN	5	44	3	3
P06396	P06396	44	44	3	Gelsolin	GSN	sp|P06396|GELS_HUMAN Gelsolin OS=Homo sapiens OX=9606 GN=GSN PE=1 SV=1	1	44	44	3
P06396-2;Q5T0I0	P06396-2	43;14	2;2	2;2	Gelsolin	GSN	sp|P06396-2|GELS_HUMAN Isoform 2 of Gelsolin OS=Homo sapiens OX=9606 GN=GSN	2	43	2	2
Q68DG0;Q9UBY9-3	Q68DG0	14;3	2;0	2;0		HSPB7	tr|Q68DG0|Q68DG0_HUMAN Heat shock protein beta-7 OS=Homo sapiens OX=9606 GN=HSPB7 PE=1 SV=1	2	14	2	2
Q9UBY9;D3YTC6	Q9UBY9;D3YTC6	16;13	16;13	0;0	Heat shock protein beta-7	HSPB7	sp|Q9UBY9|HSPB7_HUMAN Heat shock protein beta-7 OS=Homo sapiens OX=9606 GN=HSPB7 PE=1 SV=1;tr|D3YTC6|D3YTC6_HUMAN Heat shock protein beta-7 OS=Homo sapiens OX=9606 GN=HSPB7 PE=1 SV=1	2	16	16	0
Q9UBY9-2	Q9UBY9-2	14	2	1	Heat shock protein beta-7	HSPB7	sp|Q9UBY9-2|HSPB7_HUMAN Isoform 2 of Heat shock protein beta-7 OS=Homo sapiens OX=9606 GN=HSPB7	1	14	2	1
Q12906;Q12906-5;Q12906-2;Q12906-3;K7EKJ9;K7ER69;K7EQR9;K7ERM6;K7ENK6;K7EM82;K7EKY0;K7EJ09;K7ELV3;K7EQ75;K7EPG3	Q12906;Q12906-5;Q12906-2;Q12906-3	42;37;37;37;13;9;9;5;5;5;5;4;2;1;1	1;1;1;1;0;0;0;0;0;0;0;0;0;0;0	1;1;1;1;0;0;0;0;0;0;0;0;0;0;0	Interleukin enhancer-binding factor 3	ILF3	sp|Q12906|ILF3_HUMAN Interleukin enhancer-binding factor 3 OS=Homo sapiens OX=9606 GN=ILF3 PE=1 SV=3;sp|Q12906-5|ILF3_HUMAN Isoform 5 of Interleukin enhancer-binding factor 3 OS=Homo sapiens OX=9606 GN=ILF3;sp|Q12906-2|ILF3_HUMAN Isoform 2 of Interleukin e	15	42	1	1
Q12906-7;Q12906-4;Q12906-6	Q12906-7;Q12906-4;Q12906-6	44;39;39	44;39;39	3;3;3	Interleukin enhancer-binding factor 3	ILF3	sp|Q12906-7|ILF3_HUMAN Isoform 7 of Interleukin enhancer-binding factor 3 OS=Homo sapiens OX=9606 GN=ILF3;sp|Q12906-4|ILF3_HUMAN Isoform 4 of Interleukin enhancer-binding factor 3 OS=Homo sapiens OX=9606 GN=ILF3;sp|Q12906-6|ILF3_HUMAN Isoform 6 of Interleu	3	44	44	3
C9J406	C9J406	61	1	1		IMMT	tr|C9J406|C9J406_HUMAN MICOS complex subunit MIC60 OS=Homo sapiens OX=9606 GN=IMMT PE=1 SV=1	1	61	1	1
Q16891;B9A067;D6RAW4	Q16891;B9A067	65;60;8	2;0;0	0;0;0	MICOS complex subunit MIC60	IMMT	sp|Q16891|MIC60_HUMAN MICOS complex subunit MIC60 OS=Homo sapiens OX=9606 GN=IMMT PE=1 SV=1;tr|B9A067|B9A067_HUMAN MICOS complex subunit MIC60 OS=Homo sapiens OX=9606 GN=IMMT PE=1 SV=2	3	65	2	0
Q16891-2	Q16891-2	65	65	0	MICOS complex subunit MIC60	IMMT	sp|Q16891-2|MIC60_HUMAN Isoform 2 of MICOS complex subunit MIC60 OS=Homo sapiens OX=9606 GN=IMMT	1	65	65	0
Q16891-3	Q16891-3	64	2	0	MICOS complex subunit MIC60	IMMT	sp|Q16891-3|MIC60_HUMAN Isoform 3 of MICOS complex subunit MIC60 OS=Homo sapiens OX=9606 GN=IMMT	1	64	2	0
J3KNV4;Q13683-7;Q13683;Q13683-9;Q13683-10;G3V2C6;G3V2I4;H0YJ26	J3KNV4;Q13683-7;Q13683;Q13683-9;Q13683-10	43;43;42;41;38;7;3;3	43;43;42;41;38;7;3;3	4;4;3;3;3;4;0;0	Integrin alpha-7;Integrin alpha-7 heavy chain;Integrin alpha-7 light chain;Integrin alpha-7 70 kDa form	ITGA7	tr|J3KNV4|J3KNV4_HUMAN Integrin alpha-7 OS=Homo sapiens OX=9606 GN=ITGA7 PE=1 SV=1;sp|Q13683-7|ITA7_HUMAN Isoform Alpha-7X2B of Integrin alpha-7 OS=Homo sapiens OX=9606 GN=ITGA7;sp|Q13683|ITA7_HUMAN Integrin alpha-7 OS=Homo sapiens OX=9606 GN=ITGA7 PE=1 SV	8	43	43	4
Q13683-3	Q13683-3	40	1	0	Integrin alpha-7;Integrin alpha-7 heavy chain;Integrin alpha-7 light chain;Integrin alpha-7 70 kDa form	ITGA7	sp|Q13683-3|ITA7_HUMAN Isoform Alpha-7X1B of Integrin alpha-7 OS=Homo sapiens OX=9606 GN=ITGA7	1	40	1	0
P05556;P05556-2;P05556-4;P05556-3;E7EQW5;C9JPK5;Q5T3E6;E9PLR6;H7C4N8;E7ERX5;C9JJP8;Q5T3E5;E9PQJ2;C9JNE0	P05556;P05556-2;P05556-4;P05556-3	31;29;29;29;9;6;6;6;5;5;4;4;4;1	2;0;0;0;0;0;0;0;0;0;0;0;0;0	2;0;0;0;0;0;0;0;0;0;0;0;0;0	Integrin beta-1	ITGB1	sp|P05556|ITB1_HUMAN Integrin beta-1 OS=Homo sapiens OX=9606 GN=ITGB1 PE=1 SV=2;sp|P05556-2|ITB1_HUMAN Isoform 2 of Integrin beta-1 OS=Homo sapiens OX=9606 GN=ITGB1;sp|P05556-4|ITB1_HUMAN Isoform 4 of Integrin beta-1 OS=Homo sapiens OX=9606 GN=ITGB1;sp|P05	14	31	2	2
P05556-5;H7C4K3	P05556-5	32;3	32;3	3;3	Integrin beta-1	ITGB1	sp|P05556-5|ITB1_HUMAN Isoform 5 of Integrin beta-1 OS=Homo sapiens OX=9606 GN=ITGB1	2	32	32	3
P01042	P01042	25	25	5	Kininogen-1;Kininogen-1 heavy chain;T-kinin;Bradykinin;Lysyl-bradykinin;Kininogen-1 light chain;Low molecular weight growth-promoting factor	KNG1	sp|P01042|KNG1_HUMAN Kininogen-1 OS=Homo sapiens OX=9606 GN=KNG1 PE=1 SV=2	1	25	25	5
P01042-2;P01042-3	P01042-2;P01042-3	22;19	2;2	2;2	Kininogen-1;Kininogen-1 heavy chain;T-kinin;Bradykinin;Lysyl-bradykinin;Kininogen-1 light chain;Low molecular weight growth-promoting factor	KNG1	sp|P01042-2|KNG1_HUMAN Isoform LMW of Kininogen-1 OS=Homo sapiens OX=9606 GN=KNG1;sp|P01042-3|KNG1_HUMAN Isoform 3 of Kininogen-1 OS=Homo sapiens OX=9606 GN=KNG1	2	22	2	2
G3V4Y7;G3V5G2	G3V4Y7	35;9	1;1	1;1		KTN1	tr|G3V4Y7|G3V4Y7_HUMAN Kinectin OS=Homo sapiens OX=9606 GN=KTN1 PE=1 SV=1	2	35	1	1
Q86UP2;Q86UP2-4;Q86UP2-2;Q86UP2-3;B7Z6P3;H0YJZ8;H0YJP2	Q86UP2;Q86UP2-4;Q86UP2-2;Q86UP2-3	81;78;77;76;18;8;7	81;78;77;76;18;8;7	47;44;43;44;1;0;0	Kinectin	KTN1	sp|Q86UP2|KTN1_HUMAN Kinectin OS=Homo sapiens OX=9606 GN=KTN1 PE=1 SV=1;sp|Q86UP2-4|KTN1_HUMAN Isoform 4 of Kinectin OS=Homo sapiens OX=9606 GN=KTN1;sp|Q86UP2-2|KTN1_HUMAN Isoform 2 of Kinectin OS=Homo sapiens OX=9606 GN=KTN1;sp|Q86UP2-3|KTN1_HUMAN Isoform	7	81	81	47
O75112;A0A096LPD7	O75112	54;5	2;0	0;0	LIM domain-binding protein 3	LDB3	sp|O75112|LDB3_HUMAN LIM domain-binding protein 3 OS=Homo sapiens OX=9606 GN=LDB3 PE=1 SV=2	2	54	2	0
O75112-2	O75112-2	48	1	0	LIM domain-binding protein 3	LDB3	sp|O75112-2|LDB3_HUMAN Isoform 2 of LIM domain-binding protein 3 OS=Homo sapiens OX=9606 GN=LDB3	1	48	1	0
O75112-3	O75112-3	29	1	1	LIM domain-binding protein 3	LDB3	sp|O75112-3|LDB3_HUMAN Isoform 3 of LIM domain-binding protein 3 OS=Homo sapiens OX=9606 GN=LDB3	1	29	1	1
O75112-4;A0A0C4DGG7	O75112-4;A0A0C4DGG7	39;20	2;0	0;0	LIM domain-binding protein 3	LDB3	sp|O75112-4|LDB3_HUMAN Isoform 4 of LIM domain-binding protein 3 OS=Homo sapiens OX=9606 GN=LDB3;tr|A0A0C4DGG7|A0A0C4DGG7_HUMAN LIM domain-binding protein 3 OS=Homo sapiens OX=9606 GN=LDB3 PE=1 SV=1	2	39	2	0
O75112-7	O75112-7	60	60	0	LIM domain-binding protein 3	LDB3	sp|O75112-7|LDB3_HUMAN Isoform 7 of LIM domain-binding protein 3 OS=Homo sapiens OX=9606 GN=LDB3	1	60	60	0
G5EA03;Q9UPQ0-3	G5EA03;Q9UPQ0-3	63;63	6;6	6;6	LIM and calponin homology domains-containing protein 1	LIMCH1	tr|G5EA03|G5EA03_HUMAN LIM and calponin homology domains-containing protein 1 OS=Homo sapiens OX=9606 GN=LIMCH1 PE=1 SV=1;sp|Q9UPQ0-3|LIMC1_HUMAN Isoform 3 of LIM and calponin homology domains-containing protein 1 OS=Homo sapiens OX=9606 GN=LIMCH1	2	63	6	6
Q9UPQ0-10;Q9UPQ0-4;Q9UPQ0-8;E7EPK0;Q9UPQ0-5	Q9UPQ0-10;Q9UPQ0-4;Q9UPQ0-8;E7EPK0;Q9UPQ0-5	64;62;57;55;55	64;62;57;55;55	0;0;0;0;0	LIM and calponin homology domains-containing protein 1	LIMCH1	sp|Q9UPQ0-10|LIMC1_HUMAN Isoform 10 of LIM and calponin homology domains-containing protein 1 OS=Homo sapiens OX=9606 GN=LIMCH1;sp|Q9UPQ0-4|LIMC1_HUMAN Isoform 4 of LIM and calponin homology domains-containing protein 1 OS=Homo sapiens OX=9606 GN=LIMCH1;sp	5	64	64	0
P02545;P02545-6;P02545-3;P02545-5;P02545-4;H0YAB0;A0A0C4DGC5	P02545;P02545-6;P02545-3;P02545-5;P02545-4	62;59;59;52;52;21;17	62;59;59;52;52;21;17	5;2;4;5;5;0;4	Prelamin-A/C;Lamin-A/C	LMNA	sp|P02545|LMNA_HUMAN Prelamin-A/C OS=Homo sapiens OX=9606 GN=LMNA PE=1 SV=1;sp|P02545-6|LMNA_HUMAN Isoform 6 of Prelamin-A/C OS=Homo sapiens OX=9606 GN=LMNA;sp|P02545-3|LMNA_HUMAN Isoform ADelta10 of Prelamin-A/C OS=Homo sapiens OX=9606 GN=LMNA;sp|P02545-5	7	62	62	5
P02545-2;Q3BDU5	P02545-2;Q3BDU5	58;51	1;1	0;0	Prelamin-A/C;Lamin-A/C	LMNA	sp|P02545-2|LMNA_HUMAN Isoform C of Prelamin-A/C OS=Homo sapiens OX=9606 GN=LMNA;tr|Q3BDU5|Q3BDU5_HUMAN Prelamin-A/C OS=Homo sapiens OX=9606 GN=LMNA PE=1 SV=1	2	58	1	0
E9PMS6;Q8WWI1-3;E9PMP7;E9PJ10;E9PK58;H0YE95;E9PLU6	E9PMS6;Q8WWI1-3;E9PMP7	76;73;56;10;9;8;7	4;1;1;1;1;0;1	1;1;1;1;1;0;1	LIM domain only protein 7	LMO7	tr|E9PMS6|E9PMS6_HUMAN LIM domain only protein 7 OS=Homo sapiens OX=9606 GN=LMO7 PE=1 SV=1;sp|Q8WWI1-3|LMO7_HUMAN Isoform 3 of LIM domain only protein 7 OS=Homo sapiens OX=9606 GN=LMO7;tr|E9PMP7|E9PMP7_HUMAN LIM domain only protein 7 (Fragment) OS=Homo sap	7	76	4	1
F8WD26;J3KP06;E9PMT2;Q8WWI1;A0A0A0MTE2;Q8WWI1-4;Q8WWI1-2;Q8WWI1-5;H0Y424;E9PRJ0;E9PRE3	F8WD26;J3KP06;E9PMT2;Q8WWI1;A0A0A0MTE2;Q8WWI1-4;Q8WWI1-2;Q8WWI1-5;H0Y424	89;89;88;87;85;84;84;83;66;9;7	89;89;88;87;85;84;84;83;66;9;7	17;17;17;15;17;15;15;15;12;5;3	LIM domain only protein 7	LMO7	tr|F8WD26|F8WD26_HUMAN LIM domain only protein 7 OS=Homo sapiens OX=9606 GN=LMO7 PE=1 SV=2;tr|J3KP06|J3KP06_HUMAN LIM domain only protein 7 OS=Homo sapiens OX=9606 GN=LMO7 PE=1 SV=2;tr|E9PMT2|E9PMT2_HUMAN LIM domain only protein 7 OS=Homo sapiens OX=9606 G	11	89	89	17
Q32MZ4;Q32MZ4-3;Q32MZ4-2;C9JTC6	Q32MZ4;Q32MZ4-3;Q32MZ4-2	29;28;28;2	20;20;20;1	20;20;20;1	Leucine-rich repeat flightless-interacting protein 1	LRRFIP1	sp|Q32MZ4|LRRF1_HUMAN Leucine-rich repeat flightless-interacting protein 1 OS=Homo sapiens OX=9606 GN=LRRFIP1 PE=1 SV=2;sp|Q32MZ4-3|LRRF1_HUMAN Isoform 3 of Leucine-rich repeat flightless-interacting protein 1 OS=Homo sapiens OX=9606 GN=LRRFIP1;sp|Q32MZ4-2	4	29	20	20
Q32MZ4-4	Q32MZ4-4	33	33	23	Leucine-rich repeat flightless-interacting protein 1	LRRFIP1	sp|Q32MZ4-4|LRRF1_HUMAN Isoform 4 of Leucine-rich repeat flightless-interacting protein 1 OS=Homo sapiens OX=9606 GN=LRRFIP1	1	33	33	23
A0A087X1K9;E5RJ48;E5RI35	A0A087X1K9;E5RJ48	11;7;3	2;2;0	2;2;0		LYPLA1	tr|A0A087X1K9|A0A087X1K9_HUMAN Acyl-protein thioesterase 1 OS=Homo sapiens OX=9606 GN=LYPLA1 PE=1 SV=1;tr|E5RJ48|E5RJ48_HUMAN Acyl-protein thioesterase 1 (Fragment) OS=Homo sapiens OX=9606 GN=LYPLA1 PE=1 SV=1	3	11	2	2
O75608;O75608-2;B4DP64;E5RGR0	O75608;O75608-2;B4DP64;E5RGR0	12;10;9;9	12;10;9;9	3;1;3;1	Acyl-protein thioesterase 1	LYPLA1	sp|O75608|LYPA1_HUMAN Acyl-protein thioesterase 1 OS=Homo sapiens OX=9606 GN=LYPLA1 PE=1 SV=1;sp|O75608-2|LYPA1_HUMAN Isoform 2 of Acyl-protein thioesterase 1 OS=Homo sapiens OX=9606 GN=LYPLA1;tr|B4DP64|B4DP64_HUMAN Acyl-protein thioesterase 1 OS=Homo sapi	4	12	12	3
E7EVA0;P27816-4;B5MEG9;A0A0J9YW37;A0A0J9YVV8	E7EVA0	146;58;56;7;5	146;58;56;7;5	68;19;23;1;0	Microtubule-associated protein	MAP4	tr|E7EVA0|E7EVA0_HUMAN Microtubule-associated protein OS=Homo sapiens OX=9606 GN=MAP4 PE=1 SV=1	5	146	146	68
P27816-5;H7C4C5	P27816-5;H7C4C5	53;33	1;1	1;1	Microtubule-associated protein 4;Microtubule-associated protein	MAP4	sp|P27816-5|MAP4_HUMAN Isoform 5 of Microtubule-associated protein 4 OS=Homo sapiens OX=9606 GN=MAP4;tr|H7C4C5|H7C4C5_HUMAN Microtubule-associated protein (Fragment) OS=Homo sapiens OX=9606 GN=MAP4 PE=1 SV=1	2	53	1	1
Q5VWP3-2;D6RHX6;D6RD42;D6R9R6	Q5VWP3-2;D6RHX6	20;19;9;4	2;1;0;0	2;1;0;0		MLIP	sp|Q5VWP3-2|MLIP_HUMAN Isoform 2 of Muscular LMNA-interacting protein OS=Homo sapiens OX=9606 GN=MLIP;tr|D6RHX6|D6RHX6_HUMAN Muscular LMNA-interacting protein OS=Homo sapiens OX=9606 GN=MLIP PE=1 SV=1	4	20	2	2
Q5VWP3-3;E9PCK9	Q5VWP3-3;E9PCK9	64;37	64;37	0;0		MLIP	sp|Q5VWP3-3|MLIP_HUMAN Isoform 3 of Muscular LMNA-interacting protein OS=Homo sapiens OX=9606 GN=MLIP;tr|E9PCK9|E9PCK9_HUMAN Muscular LMNA-interacting protein (Fragment) OS=Homo sapiens OX=9606 GN=MLIP PE=1 SV=1	2	64	64	0
Q5VWP3-4	Q5VWP3-4	62	2	0		MLIP	sp|Q5VWP3-4|MLIP_HUMAN Isoform 4 of Muscular LMNA-interacting protein OS=Homo sapiens OX=9606 GN=MLIP	1	62	2	0
O96007	O96007	10	10	10	Molybdopterin synthase catalytic subunit	MOCS2	sp|O96007|MOC2B_HUMAN Molybdopterin synthase catalytic subunit OS=Homo sapiens OX=9606 GN=MOCS2 PE=1 SV=1	1	10	10	10
O96033;E9PKT9	O96033;E9PKT9	6;4	6;4	6;4	Molybdopterin synthase sulfur carrier subunit	MOCS2	sp|O96033|MOC2A_HUMAN Molybdopterin synthase sulfur carrier subunit OS=Homo sapiens OX=9606 GN=MOCS2 PE=1 SV=1;tr|E9PKT9|E9PKT9_HUMAN Molybdopterin synthase sulfur carrier subunit OS=Homo sapiens OX=9606 GN=MOCS2 PE=1 SV=2	2	6	6	6
Q9UN36;Q9UN36-3;G3V2I9;G3V578;H0YJT9;G3V5S0;G3V383;G3V5L7;G3V5P9;G3V2S0;G3V552;G3V3P6;G3V4T9;G3V2T2;G3V3P1;G3V3D5;G3V358;A0A0U1RR50;G3V5B5;G3V2A6;H0YJ56;G3V4X3	Q9UN36;Q9UN36-3;G3V2I9;G3V578;H0YJT9;G3V5S0;G3V383	20;19;13;12;12;11;10;9;8;8;8;8;8;8;8;8;8;8;7;6;5;3	20;19;13;12;12;11;10;9;8;8;8;8;8;8;8;8;8;8;7;6;5;3	1;1;1;0;0;1;1;0;1;1;1;1;1;1;1;1;1;0;1;0;0;0	Protein NDRG2	NDRG2	sp|Q9UN36|NDRG2_HUMAN Protein NDRG2 OS=Homo sapiens OX=9606 GN=NDRG2 PE=1 SV=2;sp|Q9UN36-3|NDRG2_HUMAN Isoform 3 of Protein NDRG2 OS=Homo sapiens OX=9606 GN=NDRG2;tr|G3V2I9|G3V2I9_HUMAN Protein NDRG2 (Fragment) OS=Homo sapiens OX=9606 GN=NDRG2 PE=1 SV=1;tr	22	20	20	1
Q9UN36-2;Q9UN36-6;G3V4S9;A0A0A0MS87;Q9UN36-4;Q9UN36-5;G3V5H8;G3V392;G3V5G0;G3V5B7;G3V271;G3V239;G3V5D7;G3V3C3;G3V2Y3;G3V5G7;G3V3X3;G3V5A6;G3V280;G3V5V9;G3V3X2;G3V285;G3V4S2;H7C0X0;G3V420;G3V237	Q9UN36-2;Q9UN36-6;G3V4S9;A0A0A0MS87;Q9UN36-4;Q9UN36-5;G3V5H8;G3V392;G3V5G0	19;17;16;16;16;16;15;10;10;9;8;7;7;7;7;7;7;7;7;7;7;7;7;6;4;4	1;1;1;1;1;1;1;1;1;1;1;1;1;1;1;1;1;1;1;1;1;1;1;1;1;1	1;1;1;1;1;1;1;1;1;1;1;1;1;1;1;1;1;1;1;1;1;1;1;1;1;1	Protein NDRG2	NDRG2	sp|Q9UN36-2|NDRG2_HUMAN Isoform 2 of Protein NDRG2 OS=Homo sapiens OX=9606 GN=NDRG2;sp|Q9UN36-6|NDRG2_HUMAN Isoform 6 of Protein NDRG2 OS=Homo sapiens OX=9606 GN=NDRG2;tr|G3V4S9|G3V4S9_HUMAN Protein NDRG2 (Fragment) OS=Homo sapiens OX=9606 GN=NDRG2 PE=1 SV	26	19	1	1
P56181	P56181	4	2	2	NADH dehydrogenase [ubiquinone] flavoprotein 3, mitochondrial	NDUFV3	sp|P56181|NDUV3_HUMAN NADH dehydrogenase [ubiquinone] flavoprotein 3, mitochondrial OS=Homo sapiens OX=9606 GN=NDUFV3 PE=1 SV=2	1	4	2	2
P56181-2	P56181-2	22	22	20	NADH dehydrogenase [ubiquinone] flavoprotein 3, mitochondrial	NDUFV3	sp|P56181-2|NDUV3_HUMAN Isoform 2 of NADH dehydrogenase [ubiquinone] flavoprotein 3, mitochondrial OS=Homo sapiens OX=9606 GN=NDUFV3	1	22	22	20
E9PCX7;H0Y8P5;D6RCR6	E9PCX7	54;5;5	2;0;2	2;0;2		NNT	tr|E9PCX7|E9PCX7_HUMAN NAD(P) transhydrogenase, mitochondrial OS=Homo sapiens OX=9606 GN=NNT PE=1 SV=1	3	54	2	2
Q13423;D6RAI5	Q13423	63;16	63;16	0;0	NAD(P) transhydrogenase, mitochondrial	NNT	sp|Q13423|NNTM_HUMAN NAD(P) transhydrogenase, mitochondrial OS=Homo sapiens OX=9606 GN=NNT PE=1 SV=3	2	63	63	0
A6NGQ3;Q5VST9-6;Q5VST9;Q5VST9-2;Q5VST9-5;A0A1B0GTS2;H3BQA7;A0A0A0MRI8;REV__Q9NX65-3;REV__Q9NX65-2	A6NGQ3;Q5VST9-6;Q5VST9;Q5VST9-2;Q5VST9-5	333;320;310;310;181;67;57;49;1;1	333;320;310;310;181;67;57;49;1;1	54;41;31;31;0;31;9;4;0;0	Obscurin	OBSCN	tr|A6NGQ3|A6NGQ3_HUMAN Obscurin OS=Homo sapiens OX=9606 GN=OBSCN PE=1 SV=5;sp|Q5VST9-6|OBSCN_HUMAN Isoform 5 of Obscurin OS=Homo sapiens OX=9606 GN=OBSCN;sp|Q5VST9|OBSCN_HUMAN Obscurin OS=Homo sapiens OX=9606 GN=OBSCN PE=1 SV=3;sp|Q5VST9-2|OBSCN_HUMAN Isof	10	333	333	54
Q5VST9-3	Q5VST9-3	291	12	12	Obscurin	OBSCN	sp|Q5VST9-3|OBSCN_HUMAN Isoform 3 of Obscurin OS=Homo sapiens OX=9606 GN=OBSCN	1	291	12	12
E9PCR7;E9PDF2;Q02218-2;E9PFG7	E9PCR7;E9PDF2;Q02218-2;E9PFG7	70;67;66;55	70;67;66;55	3;1;0;0	2-oxoglutarate dehydrogenase, mitochondrial	OGDH	tr|E9PCR7|E9PCR7_HUMAN 2-oxoglutarate dehydrogenase, mitochondrial OS=Homo sapiens OX=9606 GN=OGDH PE=1 SV=1;tr|E9PDF2|E9PDF2_HUMAN 2-oxoglutarate dehydrogenase, mitochondrial OS=Homo sapiens OX=9606 GN=OGDH PE=1 SV=1;sp|Q02218-2|ODO1_HUMAN Isoform 2 of 2-	4	70	70	3
Q02218;A0A0D9SFS3;Q02218-3;C9J4G7	Q02218;A0A0D9SFS3	68;65;27;8	1;1;1;1	1;1;1;1	2-oxoglutarate dehydrogenase, mitochondrial	OGDH	sp|Q02218|ODO1_HUMAN 2-oxoglutarate dehydrogenase, mitochondrial OS=Homo sapiens OX=9606 GN=OGDH PE=1 SV=3;tr|A0A0D9SFS3|A0A0D9SFS3_HUMAN 2-oxoglutarate dehydrogenase, mitochondrial OS=Homo sapiens OX=9606 GN=OGDH PE=1 SV=1	4	68	1	1
P13674	P13674	18	1	1	Prolyl 4-hydroxylase subunit alpha-1	P4HA1	sp|P13674|P4HA1_HUMAN Prolyl 4-hydroxylase subunit alpha-1 OS=Homo sapiens OX=9606 GN=P4HA1 PE=1 SV=2	1	18	1	1
P13674-3;P13674-2	P13674-3;P13674-2	19;19	19;19	2;2	Prolyl 4-hydroxylase subunit alpha-1	P4HA1	sp|P13674-3|P4HA1_HUMAN Isoform 3 of Prolyl 4-hydroxylase subunit alpha-1 OS=Homo sapiens OX=9606 GN=P4HA1;sp|P13674-2|P4HA1_HUMAN Isoform 2 of Prolyl 4-hydroxylase subunit alpha-1 OS=Homo sapiens OX=9606 GN=P4HA1	2	19	19	2
Q8WX93;Q8WX93-5;Q8WX93-3;Q8WX93-8;Q8WX93-4;Q8WX93-7;H0Y952;Q8WX93-6;A0A3B3ISX8;F8WA26;D6R9F5;D6RBB1;D6R9Z5;D6RBH5	Q8WX93;Q8WX93-5;Q8WX93-3;Q8WX93-8;Q8WX93-4	58;52;48;42;37;26;14;14;13;6;3;3;2;2	57;51;47;41;36;25;14;14;13;6;3;3;2;2	10;4;10;4;8;4;0;0;6;0;0;0;0;0	Palladin	PALLD	sp|Q8WX93|PALLD_HUMAN Palladin OS=Homo sapiens OX=9606 GN=PALLD PE=1 SV=3;sp|Q8WX93-5|PALLD_HUMAN Isoform 5 of Palladin OS=Homo sapiens OX=9606 GN=PALLD;sp|Q8WX93-3|PALLD_HUMAN Isoform 3 of Palladin OS=Homo sapiens OX=9606 GN=PALLD;sp|Q8WX93-8|PALLD_HUMAN	14	58	57	10
Q8WX93-2;H0YA05	Q8WX93-2	49;12	1;1	0;0	Palladin	PALLD	sp|Q8WX93-2|PALLD_HUMAN Isoform 2 of Palladin OS=Homo sapiens OX=9606 GN=PALLD	2	49	1	0
Q8WX93-9	Q8WX93-9	49	1	1	Palladin	PALLD	sp|Q8WX93-9|PALLD_HUMAN Isoform 9 of Palladin OS=Homo sapiens OX=9606 GN=PALLD	1	49	1	1
Q53GG5	Q53GG5	20	5	3	PDZ and LIM domain protein 3	PDLIM3	sp|Q53GG5|PDLI3_HUMAN PDZ and LIM domain protein 3 OS=Homo sapiens OX=9606 GN=PDLIM3 PE=1 SV=1	1	20	5	3
Q53GG5-2;Q53GG5-3	Q53GG5-2;Q53GG5-3	25;15	25;15	10;9	PDZ and LIM domain protein 3	PDLIM3	sp|Q53GG5-2|PDLI3_HUMAN Isoform 2 of PDZ and LIM domain protein 3 OS=Homo sapiens OX=9606 GN=PDLIM3;sp|Q53GG5-3|PDLI3_HUMAN Isoform 3 of PDZ and LIM domain protein 3 OS=Homo sapiens OX=9606 GN=PDLIM3	2	25	25	10
Q96HC4;H0Y8Y3;A0A0D9SFR4	Q96HC4;H0Y8Y3	35;19;9	7;2;4	5;0;4	PDZ and LIM domain protein 5	PDLIM5	sp|Q96HC4|PDLI5_HUMAN PDZ and LIM domain protein 5 OS=Homo sapiens OX=9606 GN=PDLIM5 PE=1 SV=5;tr|H0Y8Y3|H0Y8Y3_HUMAN PDZ and LIM domain protein 5 (Fragment) OS=Homo sapiens OX=9606 GN=PDLIM5 PE=1 SV=1	3	35	7	5
Q96HC4-2;H0YBI4	Q96HC4-2;H0YBI4	22;19	4;4	0;0	PDZ and LIM domain protein 5	PDLIM5	sp|Q96HC4-2|PDLI5_HUMAN Isoform 2 of PDZ and LIM domain protein 5 OS=Homo sapiens OX=9606 GN=PDLIM5;tr|H0YBI4|H0YBI4_HUMAN PDZ and LIM domain protein 5 (Fragment) OS=Homo sapiens OX=9606 GN=PDLIM5 PE=1 SV=1	2	22	4	0
Q96HC4-3;H0Y929;D6RAA1;A0A0D9SFW3;D6RGG6;Q96HC4-5	Q96HC4-3	20;5;1;1;1;1	1;0;0;0;0;0	1;0;0;0;0;0	PDZ and LIM domain protein 5	PDLIM5	sp|Q96HC4-3|PDLI5_HUMAN Isoform 3 of PDZ and LIM domain protein 5 OS=Homo sapiens OX=9606 GN=PDLIM5	6	20	1	1
Q96HC4-6	Q96HC4-6	42	42	11	PDZ and LIM domain protein 5	PDLIM5	sp|Q96HC4-6|PDLI5_HUMAN Isoform 6 of PDZ and LIM domain protein 5 OS=Homo sapiens OX=9606 GN=PDLIM5	1	42	42	11
O60825;F6RAZ1;I1Z9G3;P16118-2;P16118;F6XNB3;H0Y483;Q4VBA9;Q16877-3;A0A087X278;A0A087X2H4;A0A1W2PNV9	O60825	34;5;3;3;3;2;2;2;2;1;1;1	34;5;3;3;3;2;2;2;2;1;1;1	3;0;0;0;0;0;0;0;0;0;0;0	6-phosphofructo-2-kinase/fructose-2,6-bisphosphatase 2;6-phosphofructo-2-kinase;Fructose-2,6-bisphosphatase	PFKFB2	sp|O60825|F262_HUMAN 6-phosphofructo-2-kinase/fructose-2,6-bisphosphatase 2 OS=Homo sapiens OX=9606 GN=PFKFB2 PE=1 SV=2	12	34	34	3
O60825-2	O60825-2	33	2	2	6-phosphofructo-2-kinase/fructose-2,6-bisphosphatase 2;6-phosphofructo-2-kinase;Fructose-2,6-bisphosphatase	PFKFB2	sp|O60825-2|F262_HUMAN Isoform 2 of 6-phosphofructo-2-kinase/fructose-2,6-bisphosphatase 2 OS=Homo sapiens OX=9606 GN=PFKFB2	1	33	2	2
G5E9Q6;P35080-2;C9J0J7;C9JQ45	G5E9Q6;P35080-2;C9J0J7;C9JQ45	8;8;7;5	8;8;7;5	3;3;3;0	Profilin;Profilin-2	PFN2	tr|G5E9Q6|G5E9Q6_HUMAN Profilin OS=Homo sapiens OX=9606 GN=PFN2 PE=1 SV=1;sp|P35080-2|PROF2_HUMAN Isoform IIb of Profilin-2 OS=Homo sapiens OX=9606 GN=PFN2;tr|C9J0J7|C9J0J7_HUMAN Profilin OS=Homo sapiens OX=9606 GN=PFN2 PE=1 SV=1;tr|C9JQ45|C9JQ45_HUMAN Pro	4	8	8	3
P35080;C9J712;C9J2N0	P35080;C9J712;C9J2N0	7;6;5	2;2;1	2;2;1	Profilin-2;Profilin	PFN2	sp|P35080|PROF2_HUMAN Profilin-2 OS=Homo sapiens OX=9606 GN=PFN2 PE=1 SV=3;tr|C9J712|C9J712_HUMAN Profilin OS=Homo sapiens OX=9606 GN=PFN2 PE=1 SV=1;tr|C9J2N0|C9J2N0_HUMAN Profilin OS=Homo sapiens OX=9606 GN=PFN2 PE=1 SV=1	3	7	2	2
Q93100;Q93100-2;H3BQ89;H3BV13;I3L3F2;I3NHZ9;I3L0Z1;I3L1N3	Q93100;Q93100-2	44;43;7;6;4;4;2;2	44;43;7;6;4;4;2;2	1;1;0;0;0;0;0;0	Phosphorylase b kinase regulatory subunit beta	PHKB	sp|Q93100|KPBB_HUMAN Phosphorylase b kinase regulatory subunit beta OS=Homo sapiens OX=9606 GN=PHKB PE=1 SV=3;sp|Q93100-2|KPBB_HUMAN Isoform 2 of Phosphorylase b kinase regulatory subunit beta OS=Homo sapiens OX=9606 GN=PHKB	8	44	44	1
Q93100-3;Q93100-4;I3L213	Q93100-3;Q93100-4	44;43;9	1;1;1	1;1;1	Phosphorylase b kinase regulatory subunit beta	PHKB	sp|Q93100-3|KPBB_HUMAN Isoform 3 of Phosphorylase b kinase regulatory subunit beta OS=Homo sapiens OX=9606 GN=PHKB;sp|Q93100-4|KPBB_HUMAN Isoform 4 of Phosphorylase b kinase regulatory subunit beta OS=Homo sapiens OX=9606 GN=PHKB	3	44	1	1
P14618;B4DNK4;H3BU13;H3BN34;H3BQZ3	P14618;B4DNK4	49;41;5;3;3	49;41;5;3;3	0;0;0;0;0	Pyruvate kinase PKM;Pyruvate kinase	PKM	sp|P14618|KPYM_HUMAN Pyruvate kinase PKM OS=Homo sapiens OX=9606 GN=PKM PE=1 SV=4;tr|B4DNK4|B4DNK4_HUMAN Pyruvate kinase OS=Homo sapiens OX=9606 GN=PKM PE=1 SV=1	5	49	49	0
P14618-2;H3BTN5;H3BR70;H3BQ34;H3BUW1;H3BTJ2;H3BT25	P14618-2;H3BTN5;H3BR70;H3BQ34	49;42;33;25;14;14;13	4;4;4;0;0;0;0	4;4;4;0;0;0;0	Pyruvate kinase PKM;Pyruvate kinase	PKM	sp|P14618-2|KPYM_HUMAN Isoform M1 of Pyruvate kinase PKM OS=Homo sapiens OX=9606 GN=PKM;tr|H3BTN5|H3BTN5_HUMAN Pyruvate kinase (Fragment) OS=Homo sapiens OX=9606 GN=PKM PE=1 SV=1;tr|H3BR70|H3BR70_HUMAN Pyruvate kinase OS=Homo sapiens OX=9606 GN=PKM PE=1 SV	7	49	4	4
H0YDN1	H0YDN1	236	2	2		PLEC	tr|H0YDN1|H0YDN1_HUMAN Plectin OS=Homo sapiens OX=9606 GN=PLEC PE=1 SV=9	1	236	2	2
Q15149;Q15149-7;Q15149-6;E9PKG0;E9PIA2;E9PQ28;REV__A0A0U1RR03	Q15149;Q15149-7;Q15149-6	341;337;337;11;5;3;1	341;337;337;11;5;3;1	4;0;0;0;0;0;0	Plectin	PLEC	sp|Q15149|PLEC_HUMAN Plectin OS=Homo sapiens OX=9606 GN=PLEC PE=1 SV=3;sp|Q15149-7|PLEC_HUMAN Isoform 7 of Plectin OS=Homo sapiens OX=9606 GN=PLEC;sp|Q15149-6|PLEC_HUMAN Isoform 6 of Plectin OS=Homo sapiens OX=9606 GN=PLEC	7	341	341	4
Q15149-3	Q15149-3	337	1	1	Plectin	PLEC	sp|Q15149-3|PLEC_HUMAN Isoform 3 of Plectin OS=Homo sapiens OX=9606 GN=PLEC	1	337	1	1
Q15149-9	Q15149-9	338	1	1	Plectin	PLEC	sp|Q15149-9|PLEC_HUMAN Isoform 9 of Plectin OS=Homo sapiens OX=9606 GN=PLEC	1	338	1	1
A0A0J9YXN7;Q96Q06	A0A0J9YXN7;Q96Q06	78;76	2;0	2;0	Perilipin-4	PLIN4	tr|A0A0J9YXN7|A0A0J9YXN7_HUMAN Perilipin-4 OS=Homo sapiens OX=9606 GN=PLIN4 PE=1 SV=1;sp|Q96Q06|PLIN4_HUMAN Perilipin-4 OS=Homo sapiens OX=9606 GN=PLIN4 PE=1 SV=2	2	78	2	2
Q96Q06-2	Q96Q06-2	78	78	2	Perilipin-4	PLIN4	sp|Q96Q06-2|PLIN4_HUMAN Isoform 2 of Perilipin-4 OS=Homo sapiens OX=9606 GN=PLIN4	1	78	78	2
Q8N490;Q8N490-4;Q8N490-3	Q8N490;Q8N490-4;Q8N490-3	6;4;4	6;4;4	4;4;4	Probable hydrolase PNKD	PNKD	sp|Q8N490|PNKD_HUMAN Probable hydrolase PNKD OS=Homo sapiens OX=9606 GN=PNKD PE=1 SV=2;sp|Q8N490-4|PNKD_HUMAN Isoform 4 of Probable hydrolase PNKD OS=Homo sapiens OX=9606 GN=PNKD;sp|Q8N490-3|PNKD_HUMAN Isoform 3 of Probable hydrolase PNKD OS=Homo sapiens O	3	6	6	4
Q8N490-2	Q8N490-2	4	2	2	Probable hydrolase PNKD	PNKD	sp|Q8N490-2|PNKD_HUMAN Isoform 2 of Probable hydrolase PNKD OS=Homo sapiens OX=9606 GN=PNKD	1	4	2	2
B1ALD9	B1ALD9	42	2	0		POSTN	tr|B1ALD9|B1ALD9_HUMAN Periostin OS=Homo sapiens OX=9606 GN=POSTN PE=1 SV=1	1	42	2	0
Q15063;CON__Q2KJC7	Q15063	44;21	44;21	0;0	Periostin	POSTN	sp|Q15063|POSTN_HUMAN Periostin OS=Homo sapiens OX=9606 GN=POSTN PE=1 SV=2	2	44	44	0
Q15063-5	Q15063-5	43	2	0	Periostin	POSTN	sp|Q15063-5|POSTN_HUMAN Isoform 5 of Periostin OS=Homo sapiens OX=9606 GN=POSTN	1	43	2	0
P55036;A6PVX3;H0Y3Y9;H0Y561	P55036;A6PVX3	15;9;4;1	1;0;1;0	1;0;1;0	26S proteasome non-ATPase regulatory subunit 4	PSMD4	sp|P55036|PSMD4_HUMAN 26S proteasome non-ATPase regulatory subunit 4 OS=Homo sapiens OX=9606 GN=PSMD4 PE=1 SV=1;tr|A6PVX3|A6PVX3_HUMAN 26S proteasome non-ATPase regulatory subunit 4 (Fragment) OS=Homo sapiens OX=9606 GN=PSMD4 PE=1 SV=1	4	15	1	1
Q5VWC4;P55036-2;H7C2J9	Q5VWC4;P55036-2	16;13;1	16;13;1	2;1;1	26S proteasome non-ATPase regulatory subunit 4	PSMD4	tr|Q5VWC4|Q5VWC4_HUMAN 26S proteasome non-ATPase regulatory subunit 4 OS=Homo sapiens OX=9606 GN=PSMD4 PE=1 SV=1;sp|P55036-2|PSMD4_HUMAN Isoform Rpn10E of 26S proteasome non-ATPase regulatory subunit 4 OS=Homo sapiens OX=9606 GN=PSMD4	3	16	16	2
Q9Y3B8;H0YGR4	Q9Y3B8;H0YGR4	12;11	1;1	0;0	Oligoribonuclease, mitochondrial	REXO2	sp|Q9Y3B8|ORN_HUMAN Oligoribonuclease, mitochondrial OS=Homo sapiens OX=9606 GN=REXO2 PE=1 SV=3;tr|H0YGR4|H0YGR4_HUMAN Oligoribonuclease, mitochondrial (Fragment) OS=Homo sapiens OX=9606 GN=REXO2 PE=1 SV=1	2	12	1	0
Q9Y3B8-3;Q9Y3B8-2;H0YG54;H0YF66	Q9Y3B8-3;Q9Y3B8-2;H0YG54	13;11;10;1	13;11;10;1	2;0;0;0	Oligoribonuclease, mitochondrial	REXO2	sp|Q9Y3B8-3|ORN_HUMAN Isoform 3 of Oligoribonuclease, mitochondrial OS=Homo sapiens OX=9606 GN=REXO2;sp|Q9Y3B8-2|ORN_HUMAN Isoform 2 of Oligoribonuclease, mitochondrial OS=Homo sapiens OX=9606 GN=REXO2;tr|H0YG54|H0YG54_HUMAN Oligoribonuclease, mitochondria	4	13	13	2
Q9NQC3;Q9NQC3-4;Q9NQC3-6;H7C106;A0A0U1RQR6;C9J685	Q9NQC3;Q9NQC3-4;Q9NQC3-6	53;45;45;6;5;2	53;45;45;6;5;2	40;37;39;0;0;2	Reticulon-4	RTN4	sp|Q9NQC3|RTN4_HUMAN Reticulon-4 OS=Homo sapiens OX=9606 GN=RTN4 PE=1 SV=2;sp|Q9NQC3-4|RTN4_HUMAN Isoform 4 of Reticulon-4 OS=Homo sapiens OX=9606 GN=RTN4;sp|Q9NQC3-6|RTN4_HUMAN Isoform 6 of Reticulon-4 OS=Homo sapiens OX=9606 GN=RTN4	6	53	53	40
Q9NQC3-2;F8W914	Q9NQC3-2;F8W914	13;11	1;1	1;1	Reticulon-4;Reticulon	RTN4	sp|Q9NQC3-2|RTN4_HUMAN Isoform 2 of Reticulon-4 OS=Homo sapiens OX=9606 GN=RTN4;tr|F8W914|F8W914_HUMAN Reticulon OS=Homo sapiens OX=9606 GN=RTN4 PE=1 SV=1	2	13	1	1
O00560;O00560-3;B4DHN5;E9PBU7	O00560;O00560-3;B4DHN5;E9PBU7	12;11;9;9	12;11;9;9	1;1;0;0	Syntenin-1	SDCBP	sp|O00560|SDCB1_HUMAN Syntenin-1 OS=Homo sapiens OX=9606 GN=SDCBP PE=1 SV=1;sp|O00560-3|SDCB1_HUMAN Isoform 3 of Syntenin-1 OS=Homo sapiens OX=9606 GN=SDCBP;tr|B4DHN5|B4DHN5_HUMAN cDNA FLJ55055, moderately similar to Syntenin-1 OS=Homo sapiens OX=9606 GN=S	4	12	12	1
O00560-2;G5EA09	O00560-2;G5EA09	12;11	1;1	1;1	Syntenin-1	SDCBP	sp|O00560-2|SDCB1_HUMAN Isoform 2 of Syntenin-1 OS=Homo sapiens OX=9606 GN=SDCBP;tr|G5EA09|G5EA09_HUMAN Syndecan binding protein (Syntenin), isoform CRA_a OS=Homo sapiens OX=9606 GN=SDCBP PE=1 SV=1	2	12	1	1
Q6P4A7	Q6P4A7	14	14	1	Sideroflexin-4	SFXN4	sp|Q6P4A7|SFXN4_HUMAN Sideroflexin-4 OS=Homo sapiens OX=9606 GN=SFXN4 PE=1 SV=1	1	14	14	1
Q6P4A7-3;B1AMV7;B1AMV8	Q6P4A7-3;B1AMV7	7;6;1	1;1;1	1;1;1	Sideroflexin-4	SFXN4	sp|Q6P4A7-3|SFXN4_HUMAN Isoform 3 of Sideroflexin-4 OS=Homo sapiens OX=9606 GN=SFXN4;tr|B1AMV7|B1AMV7_HUMAN Sideroflexin-4 (Fragment) OS=Homo sapiens OX=9606 GN=SFXN4 PE=1 SV=1	3	7	1	1
Q92629	Q92629	16	16	1	Delta-sarcoglycan	SGCD	sp|Q92629|SGCD_HUMAN Delta-sarcoglycan OS=Homo sapiens OX=9606 GN=SGCD PE=1 SV=2	1	16	16	1
Q92629-2;Q92629-3;E5RI34	Q92629-2;Q92629-3	16;14;3	1;1;1	1;1;1	Delta-sarcoglycan	SGCD	sp|Q92629-2|SGCD_HUMAN Isoform 2 of Delta-sarcoglycan OS=Homo sapiens OX=9606 GN=SGCD;sp|Q92629-3|SGCD_HUMAN Isoform 3 of Delta-sarcoglycan OS=Homo sapiens OX=9606 GN=SGCD	3	16	1	1
Q15599	Q15599	19	19	0	Na(+)/H(+) exchange regulatory cofactor NHE-RF2	SLC9A3R2	sp|Q15599|NHRF2_HUMAN Na(+)/H(+) exchange regulatory cofactor NHE-RF2 OS=Homo sapiens OX=9606 GN=SLC9A3R2 PE=1 SV=2	1	19	19	0
Q15599-3	Q15599-3	14	1	1	Na(+)/H(+) exchange regulatory cofactor NHE-RF2	SLC9A3R2	sp|Q15599-3|NHRF2_HUMAN Isoform 3 of Na(+)/H(+) exchange regulatory cofactor NHE-RF2 OS=Homo sapiens OX=9606 GN=SLC9A3R2	1	14	1	1
B7Z964;Q14BN4-5;C9JA20	B7Z964;Q14BN4-5	35;35;10	2;2;2	0;0;0	Sarcolemmal membrane-associated protein	SLMAP	tr|B7Z964|B7Z964_HUMAN Sarcolemmal membrane-associated protein OS=Homo sapiens OX=9606 GN=SLMAP PE=1 SV=1;sp|Q14BN4-5|SLMAP_HUMAN Isoform 5 of Sarcolemmal membrane-associated protein OS=Homo sapiens OX=9606 GN=SLMAP	3	35	2	0
Q14BN4-3;Q14BN4-2;Q14BN4;H7BZK0;Q14BN4-4;H7C3M8;Q14BN4-6;Q14BN4-7;H7C5G9	Q14BN4-3;Q14BN4-2;Q14BN4;H7BZK0;Q14BN4-4;H7C3M8	43;42;42;36;36;34;9;8;2	43;42;42;36;36;34;9;8;2	9;8;8;2;2;0;8;8;2	Sarcolemmal membrane-associated protein	SLMAP	sp|Q14BN4-3|SLMAP_HUMAN Isoform 3 of Sarcolemmal membrane-associated protein OS=Homo sapiens OX=9606 GN=SLMAP;sp|Q14BN4-2|SLMAP_HUMAN Isoform 2 of Sarcolemmal membrane-associated protein OS=Homo sapiens OX=9606 GN=SLMAP;sp|Q14BN4|SLMAP_HUMAN Sarcolemmal me	9	43	43	9
B5MCI0;H7BZZ8	B5MCI0;H7BZZ8	17;10	5;1	4;1		SMTN	tr|B5MCI0|B5MCI0_HUMAN Smoothelin OS=Homo sapiens OX=9606 GN=SMTN PE=1 SV=1;tr|H7BZZ8|H7BZZ8_HUMAN Smoothelin (Fragment) OS=Homo sapiens OX=9606 GN=SMTN PE=1 SV=1	2	17	5	4
P53814-5;A0A087WVP4;A0A096LNK9;H7C372;C9JGQ0	P53814-5;A0A087WVP4	42;39;12;7;3	42;39;12;7;3	0;0;0;0;0	Smoothelin	SMTN	sp|P53814-5|SMTN_HUMAN Isoform B2 of Smoothelin OS=Homo sapiens OX=9606 GN=SMTN;tr|A0A087WVP4|A0A087WVP4_HUMAN Smoothelin OS=Homo sapiens OX=9606 GN=SMTN PE=1 SV=1	5	42	42	0
Q9BX66;Q9BX66-2	Q9BX66;Q9BX66-2	78;70	4;3	1;1	Sorbin and SH3 domain-containing protein 1	SORBS1	sp|Q9BX66|SRBS1_HUMAN Sorbin and SH3 domain-containing protein 1 OS=Homo sapiens OX=9606 GN=SORBS1 PE=1 SV=3;sp|Q9BX66-2|SRBS1_HUMAN Isoform 2 of Sorbin and SH3 domain-containing protein 1 OS=Homo sapiens OX=9606 GN=SORBS1	2	78	4	1
Q9BX66-11;S4R406	Q9BX66-11	79;5	79;5	1;0	Sorbin and SH3 domain-containing protein 1	SORBS1	sp|Q9BX66-11|SRBS1_HUMAN Isoform 11 of Sorbin and SH3 domain-containing protein 1 OS=Homo sapiens OX=9606 GN=SORBS1	2	79	79	1
Q9BX66-5	Q9BX66-5	62	2	1	Sorbin and SH3 domain-containing protein 1	SORBS1	sp|Q9BX66-5|SRBS1_HUMAN Isoform 5 of Sorbin and SH3 domain-containing protein 1 OS=Homo sapiens OX=9606 GN=SORBS1	1	62	2	1
Q9BX66-6;A0A0U1RQI5	Q9BX66-6;A0A0U1RQI5	53;35	1;1	1;1	Sorbin and SH3 domain-containing protein 1	SORBS1	sp|Q9BX66-6|SRBS1_HUMAN Isoform 6 of Sorbin and SH3 domain-containing protein 1 OS=Homo sapiens OX=9606 GN=SORBS1;tr|A0A0U1RQI5|A0A0U1RQI5_HUMAN Sorbin and SH3 domain-containing protein 1 (Fragment) OS=Homo sapiens OX=9606 GN=SORBS1 PE=1 SV=1	2	53	1	1
O94875-10;O94875-3;H7BZX1;C9J3W4;C9JL62;C9IZ89	O94875-10;O94875-3	65;51;21;1;1;1	64;50;21;1;1;1	13;0;0;0;0;0	Sorbin and SH3 domain-containing protein 2	SORBS2	sp|O94875-10|SRBS2_HUMAN Isoform 10 of Sorbin and SH3 domain-containing protein 2 OS=Homo sapiens OX=9606 GN=SORBS2;sp|O94875-3|SRBS2_HUMAN Isoform 3 of Sorbin and SH3 domain-containing protein 2 OS=Homo sapiens OX=9606 GN=SORBS2	6	65	64	13
O94875-11;O94875;H7BZK1	O94875-11;O94875	51;47;22	3;3;2	0;0;0	Sorbin and SH3 domain-containing protein 2	SORBS2	sp|O94875-11|SRBS2_HUMAN Isoform 11 of Sorbin and SH3 domain-containing protein 2 OS=Homo sapiens OX=9606 GN=SORBS2;sp|O94875|SRBS2_HUMAN Sorbin and SH3 domain-containing protein 2 OS=Homo sapiens OX=9606 GN=SORBS2 PE=1 SV=3	3	51	3	0
O94875-12;O94875-4;H7BXR3;O94875-5;C9JDX2;C9JI79;C9IZT7;C9JBB0;C9JEA9;C9J4Z9;C9JZ60;C9J372;C9J620;C9JFS9;C9JC90;C9J9D3;C9J348	O94875-12;O94875-4;H7BXR3;O94875-5	56;53;45;45;5;4;4;4;4;4;3;3;3;3;3;2;2	5;2;2;2;5;4;4;4;4;4;3;3;3;3;3;2;2	0;0;0;0;0;0;0;0;0;0;0;0;0;0;0;0;0	Sorbin and SH3 domain-containing protein 2	SORBS2	sp|O94875-12|SRBS2_HUMAN Isoform 12 of Sorbin and SH3 domain-containing protein 2 OS=Homo sapiens OX=9606 GN=SORBS2;sp|O94875-4|SRBS2_HUMAN Isoform 4 of Sorbin and SH3 domain-containing protein 2 OS=Homo sapiens OX=9606 GN=SORBS2;tr|H7BXR3|H7BXR3_HUMAN Sor	17	56	5	0
O94875-2	O94875-2	52	4	4	Sorbin and SH3 domain-containing protein 2	SORBS2	sp|O94875-2|SRBS2_HUMAN Isoform 2 of Sorbin and SH3 domain-containing protein 2 OS=Homo sapiens OX=9606 GN=SORBS2	1	52	4	4
O94875-7	O94875-7	47	1	0	Sorbin and SH3 domain-containing protein 2	SORBS2	sp|O94875-7|SRBS2_HUMAN Isoform 7 of Sorbin and SH3 domain-containing protein 2 OS=Homo sapiens OX=9606 GN=SORBS2	1	47	1	0
O94875-8	O94875-8	50	1	0	Sorbin and SH3 domain-containing protein 2	SORBS2	sp|O94875-8|SRBS2_HUMAN Isoform 8 of Sorbin and SH3 domain-containing protein 2 OS=Homo sapiens OX=9606 GN=SORBS2	1	50	1	0
A0A0D9SF54;A0A0D9SFF6;A0A0D9SFH4;A0A1B0GTB7;A0A1B0GV13;A0A1B0GW19;A0A1B0GWE2;A0A1B0GUH3	A0A0D9SF54	192;10;3;2;2;1;1;1	2;0;0;0;0;0;0;0	0;0;0;0;0;0;0;0		SPTAN1	tr|A0A0D9SF54|A0A0D9SF54_HUMAN Spectrin alpha chain, non-erythrocytic 1 OS=Homo sapiens OX=9606 GN=SPTAN1 PE=1 SV=1	8	192	2	0
A0A0D9SGF6	A0A0D9SGF6	195	195	4		SPTAN1	tr|A0A0D9SGF6|A0A0D9SGF6_HUMAN Spectrin alpha chain, non-erythrocytic 1 OS=Homo sapiens OX=9606 GN=SPTAN1 PE=1 SV=1	1	195	195	4
Q13813	Q13813	193	2	0	Spectrin alpha chain, non-erythrocytic 1	SPTAN1	sp|Q13813|SPTN1_HUMAN Spectrin alpha chain, non-erythrocytic 1 OS=Homo sapiens OX=9606 GN=SPTAN1 PE=1 SV=3	1	193	2	0
Q01082;A0A087WUZ3;F8W6C1	Q01082;A0A087WUZ3	177;174;47	177;174;47	17;17;0	Spectrin beta chain, non-erythrocytic 1	SPTBN1	sp|Q01082|SPTB2_HUMAN Spectrin beta chain, non-erythrocytic 1 OS=Homo sapiens OX=9606 GN=SPTBN1 PE=1 SV=2;tr|A0A087WUZ3|A0A087WUZ3_HUMAN Spectrin beta chain OS=Homo sapiens OX=9606 GN=SPTBN1 PE=1 SV=1	3	177	177	17
Q01082-2;Q01082-3	Q01082-2;Q01082-3	162;160	2;2	2;2	Spectrin beta chain, non-erythrocytic 1	SPTBN1	sp|Q01082-2|SPTB2_HUMAN Isoform Short of Spectrin beta chain, non-erythrocytic 1 OS=Homo sapiens OX=9606 GN=SPTBN1;sp|Q01082-3|SPTB2_HUMAN Isoform 2 of Spectrin beta chain, non-erythrocytic 1 OS=Homo sapiens OX=9606 GN=SPTBN1	2	162	2	2
Q8N3V7	Q8N3V7	45	9	7	Synaptopodin	SYNPO	sp|Q8N3V7|SYNPO_HUMAN Synaptopodin OS=Homo sapiens OX=9606 GN=SYNPO PE=1 SV=2	1	45	9	7
Q8N3V7-2	Q8N3V7-2	46	46	8	Synaptopodin	SYNPO	sp|Q8N3V7-2|SYNPO_HUMAN Isoform 2 of Synaptopodin OS=Homo sapiens OX=9606 GN=SYNPO	1	46	46	8
Q9UMS6;Q9UMS6-5	Q9UMS6;Q9UMS6-5	69;44	2;2	2;2	Synaptopodin-2	SYNPO2	sp|Q9UMS6|SYNP2_HUMAN Synaptopodin-2 OS=Homo sapiens OX=9606 GN=SYNPO2 PE=1 SV=2;sp|Q9UMS6-5|SYNP2_HUMAN Isoform 5 of Synaptopodin-2 OS=Homo sapiens OX=9606 GN=SYNPO2	2	69	2	2
Q9UMS6-2;Q9UMS6-4;H0Y9Y3;Q9UMS6-3;B4E258	Q9UMS6-2;Q9UMS6-4;H0Y9Y3;Q9UMS6-3	79;78;74;67;3	79;78;74;67;3	12;12;11;0;0	Synaptopodin-2	SYNPO2	sp|Q9UMS6-2|SYNP2_HUMAN Isoform 2 of Synaptopodin-2 OS=Homo sapiens OX=9606 GN=SYNPO2;sp|Q9UMS6-4|SYNP2_HUMAN Isoform 4 of Synaptopodin-2 OS=Homo sapiens OX=9606 GN=SYNPO2;tr|H0Y9Y3|H0Y9Y3_HUMAN Synaptopodin-2 (Fragment) OS=Homo sapiens OX=9606 GN=SYNPO2 P	5	79	79	12
Q9H987	Q9H987	59	58	7	Synaptopodin 2-like protein	SYNPO2L	sp|Q9H987|SYP2L_HUMAN Synaptopodin 2-like protein OS=Homo sapiens OX=9606 GN=SYNPO2L PE=2 SV=3	1	59	58	7
Q9H987-2	Q9H987-2	52	2	2	Synaptopodin 2-like protein	SYNPO2L	sp|Q9H987-2|SYP2L_HUMAN Isoform 2 of Synaptopodin 2-like protein OS=Homo sapiens OX=9606 GN=SYNPO2L	1	52	2	2
A0A2R8Y4T1;E9PGF5;A0A087WWW7;H0Y4U1;E7ERH1;E7EMG1;Q9HBL0-2;H7C3Z4;C9JI43;C9J8K5;C9JFT7;C9JZT0	A0A2R8Y4T1;E9PGF5;A0A087WWW7;H0Y4U1	98;96;78;49;36;22;18;7;5;5;3;1	98;96;78;49;36;22;18;7;5;5;3;1	4;2;2;2;2;1;1;0;0;2;0;0		TNS1	tr|A0A2R8Y4T1|A0A2R8Y4T1_HUMAN Tensin-1 OS=Homo sapiens OX=9606 GN=TNS1 PE=1 SV=1;tr|E9PGF5|E9PGF5_HUMAN Tensin-1 OS=Homo sapiens OX=9606 GN=TNS1 PE=1 SV=1;tr|A0A087WWW7|A0A087WWW7_HUMAN Tensin-1 OS=Homo sapiens OX=9606 GN=TNS1 PE=1 SV=1;tr|H0Y4U1|H0Y4U1_H	12	98	98	4
Q9HBL0	Q9HBL0	97	3	1	Tensin-1	TNS1	sp|Q9HBL0|TENS1_HUMAN Tensin-1 OS=Homo sapiens OX=9606 GN=TNS1 PE=1 SV=2	1	97	3	1
A0A140TA41;A0A140T9C0;P22105-1;P22105;P22105-4;A0A140T8Z8;A0A140T956;A0A140T9L7;A0A087X0I0;P22105-2	A0A140TA41;A0A140T9C0;P22105-1;P22105;P22105-4;A0A140T8Z8;A0A140T956	172;171;170;170;169;132;106;75;72;31	2;2;0;0;0;0;0;0;0;0	0;0;0;0;0;0;0;0;0;0	Tenascin-X	TNXB	tr|A0A140TA41|A0A140TA41_HUMAN Tenascin-X OS=Homo sapiens OX=9606 GN=TNXB PE=1 SV=1;tr|A0A140T9C0|A0A140T9C0_HUMAN Tenascin-X OS=Homo sapiens OX=9606 GN=TNXB PE=1 SV=1;sp|P22105-1|TENX_HUMAN Isoform 3 of Tenascin-X OS=Homo sapiens OX=9606 GN=TNXB;sp|P22105	10	172	2	0
A0A3B3ISX9;A0A087WWA5	A0A3B3ISX9	183;70	183;70	13;7		TNXB	tr|A0A3B3ISX9|A0A3B3ISX9_HUMAN Tenascin-X OS=Homo sapiens OX=9606 GN=TNXB PE=1 SV=1	2	183	183	13
Q6ZVM7;Q6ZVM7-2;Q6ZVM7-3;B7Z2U2;Q6ZVM7-4;K7ENB0;K7EKL6	Q6ZVM7;Q6ZVM7-2;Q6ZVM7-3;B7Z2U2	24;20;18;16;10;3;1	2;2;1;0;0;0;0	2;2;1;0;0;0;0	TOM1-like protein 2	TOM1L2	sp|Q6ZVM7|TM1L2_HUMAN TOM1-like protein 2 OS=Homo sapiens OX=9606 GN=TOM1L2 PE=1 SV=1;sp|Q6ZVM7-2|TM1L2_HUMAN Isoform 2 of TOM1-like protein 2 OS=Homo sapiens OX=9606 GN=TOM1L2;sp|Q6ZVM7-3|TM1L2_HUMAN Isoform 3 of TOM1-like protein 2 OS=Homo sapiens OX=960	7	24	2	2
Q6ZVM7-5;F5H3S6	Q6ZVM7-5;F5H3S6	24;16	24;16	2;2	TOM1-like protein 2	TOM1L2	sp|Q6ZVM7-5|TM1L2_HUMAN Isoform 5 of TOM1-like protein 2 OS=Homo sapiens OX=9606 GN=TOM1L2;tr|F5H3S6|F5H3S6_HUMAN TOM1-like protein 2 OS=Homo sapiens OX=9606 GN=TOM1L2 PE=1 SV=1	2	24	24	2
Q5JTV8;A0A0A0MSK5;H0YDU3	Q5JTV8;A0A0A0MSK5	28;23;8	1;1;1	0;0;0	Torsin-1A-interacting protein 1	TOR1AIP1	sp|Q5JTV8|TOIP1_HUMAN Torsin-1A-interacting protein 1 OS=Homo sapiens OX=9606 GN=TOR1AIP1 PE=1 SV=2;tr|A0A0A0MSK5|A0A0A0MSK5_HUMAN Torsin-1A-interacting protein 1 OS=Homo sapiens OX=9606 GN=TOR1AIP1 PE=1 SV=1	3	28	1	0
Q5JTV8-3;J3KN66;Q5JTV8-2;H0Y4R4	Q5JTV8-3;J3KN66;Q5JTV8-2;H0Y4R4	28;27;15;14	28;27;15;14	1;1;1;0	Torsin-1A-interacting protein 1	TOR1AIP1	sp|Q5JTV8-3|TOIP1_HUMAN Isoform 3 of Torsin-1A-interacting protein 1 OS=Homo sapiens OX=9606 GN=TOR1AIP1;tr|J3KN66|J3KN66_HUMAN Torsin-1A-interacting protein 1 OS=Homo sapiens OX=9606 GN=TOR1AIP1 PE=1 SV=1;sp|Q5JTV8-2|TOIP1_HUMAN Isoform 2 of Torsin-1A-int	4	28	28	1
O43399-4;O43399-3;O43399-2;O43399-6	O43399-4;O43399-3;O43399-2;O43399-6	15;15;14;11	1;1;1;1	1;1;1;1	Tumor protein D54	TPD52L2	sp|O43399-4|TPD54_HUMAN Isoform 4 of Tumor protein D54 OS=Homo sapiens OX=9606 GN=TPD52L2;sp|O43399-3|TPD54_HUMAN Isoform 3 of Tumor protein D54 OS=Homo sapiens OX=9606 GN=TPD52L2;sp|O43399-2|TPD54_HUMAN Isoform 2 of Tumor protein D54 OS=Homo sapiens OX=96	4	15	1	1
O43399-5;O43399-7;O43399;A0A087WYR3;A0A087WZ51	O43399-5;O43399-7;O43399;A0A087WYR3;A0A087WZ51	18;18;17;14;11	18;18;17;14;11	4;4;4;4;0	Tumor protein D54	TPD52L2	sp|O43399-5|TPD54_HUMAN Isoform 5 of Tumor protein D54 OS=Homo sapiens OX=9606 GN=TPD52L2;sp|O43399-7|TPD54_HUMAN Isoform 7 of Tumor protein D54 OS=Homo sapiens OX=9606 GN=TPD52L2;sp|O43399|TPD54_HUMAN Tumor protein D54 OS=Homo sapiens OX=9606 GN=TPD52L2 P	5	18	18	4
H0YKJ4;H0YK48;P09493-5;H0YN06	H0YKJ4;H0YK48;P09493-5	41;40;37;2	3;3;3;2	0;0;0;0	Tropomyosin alpha-1 chain	TPM1	tr|H0YKJ4|H0YKJ4_HUMAN Tropomyosin 1 (Alpha), isoform CRA_b OS=Homo sapiens OX=9606 GN=TPM1 PE=1 SV=2;tr|H0YK48|H0YK48_HUMAN Tropomyosin alpha-1 chain OS=Homo sapiens OX=9606 GN=TPM1 PE=1 SV=1;sp|P09493-5|TPM1_HUMAN Isoform 5 of Tropomyosin alpha-1 chain O	4	41	3	0
P09493-10;P09493-4;H0YKX5	P09493-10;P09493-4;H0YKX5	56;55;28	4;4;4	0;0;0	Tropomyosin alpha-1 chain	TPM1	sp|P09493-10|TPM1_HUMAN Isoform 10 of Tropomyosin alpha-1 chain OS=Homo sapiens OX=9606 GN=TPM1;sp|P09493-4|TPM1_HUMAN Isoform 4 of Tropomyosin alpha-1 chain OS=Homo sapiens OX=9606 GN=TPM1;tr|H0YKX5|H0YKX5_HUMAN Tropomyosin alpha-1 chain (Fragment) OS=Hom	3	56	4	0
P09493-6	P09493-6	52	2	0	Tropomyosin alpha-1 chain	TPM1	sp|P09493-6|TPM1_HUMAN Isoform 6 of Tropomyosin alpha-1 chain OS=Homo sapiens OX=9606 GN=TPM1	1	52	2	0
Q6ZN40	Q6ZN40	61	7	1		TPM1	tr|Q6ZN40|Q6ZN40_HUMAN Tropomyosin 1 (Alpha), isoform CRA_f OS=Homo sapiens OX=9606 GN=TPM1 PE=1 SV=1	1	61	7	1
P07951;Q5TCU8;U3KQK2;A0A2R8Y6A3	P07951;Q5TCU8	39;37;12;5	18;16;8;3	0;0;0;0	Tropomyosin beta chain	TPM2	sp|P07951|TPM2_HUMAN Tropomyosin beta chain OS=Homo sapiens OX=9606 GN=TPM2 PE=1 SV=1;tr|Q5TCU8|Q5TCU8_HUMAN Tropomyosin beta chain OS=Homo sapiens OX=9606 GN=TPM2 PE=1 SV=1	4	39	18	0
Q5TCU3	Q5TCU3	39	2	0		TPM2	tr|Q5TCU3|Q5TCU3_HUMAN Tropomyosin beta chain OS=Homo sapiens OX=9606 GN=TPM2 PE=1 SV=1	1	39	2	0
J3KN67;D6RGJ6	J3KN67	48;14	7;0	0;0		TPM3	tr|J3KN67|J3KN67_HUMAN Tropomyosin alpha-3 chain OS=Homo sapiens OX=9606 GN=TPM3 PE=1 SV=1	2	48	7	0
P06753	P06753	48	26	0	Tropomyosin alpha-3 chain	TPM3	sp|P06753|TPM3_HUMAN Tropomyosin alpha-3 chain OS=Homo sapiens OX=9606 GN=TPM3 PE=1 SV=2	1	48	26	0
P06753-5;P06753-7	P06753-5;P06753-7	38;23	7;0	0;0	Tropomyosin alpha-3 chain	TPM3	sp|P06753-5|TPM3_HUMAN Isoform 5 of Tropomyosin alpha-3 chain OS=Homo sapiens OX=9606 GN=TPM3;sp|P06753-7|TPM3_HUMAN Isoform 7 of Tropomyosin alpha-3 chain OS=Homo sapiens OX=9606 GN=TPM3	2	38	7	0
A0A2R8Y5V9;A0A2R8YGX3;A0A2R8YH90;K7EP68;K7EMU5;A0A2R8YHD2;K7EPV9	A0A2R8Y5V9;A0A2R8YGX3;A0A2R8YH90	29;25;24;13;12;11;11	7;6;2;0;0;0;0	1;0;1;0;0;0;0		TPM4	tr|A0A2R8Y5V9|A0A2R8Y5V9_HUMAN Tropomyosin alpha-4 chain OS=Homo sapiens OX=9606 GN=TPM4 PE=1 SV=1;tr|A0A2R8YGX3|A0A2R8YGX3_HUMAN Tropomyosin alpha-4 chain OS=Homo sapiens OX=9606 GN=TPM4 PE=1 SV=1;tr|A0A2R8YH90|A0A2R8YH90_HUMAN Tropomyosin alpha-4 chain (	7	29	7	1
P67936-2;K7ENT6;A0A2R8YE05;A0A2R8YEU4;K7ERG3;K7ELP0	P67936-2;K7ENT6;A0A2R8YE05;A0A2R8YEU4;K7ERG3	32;26;23;22;18;8	7;5;4;3;1;2	3;1;0;1;1;2		TPM4	sp|P67936-2|TPM4_HUMAN Isoform 2 of Tropomyosin alpha-4 chain OS=Homo sapiens OX=9606 GN=TPM4;tr|K7ENT6|K7ENT6_HUMAN Tropomyosin alpha-4 chain OS=Homo sapiens OX=9606 GN=TPM4 PE=1 SV=2;tr|A0A2R8YE05|A0A2R8YE05_HUMAN Tropomyosin alpha-4 chain OS=Homo sapien	6	32	7	3
A0A0A0MRA3;Q8WZ42-9;Q8WZ42-3;Q8WZ42-10;A0A0U1RRH3;C9JQJ2;REV__P61225	A0A0A0MRA3;Q8WZ42-9;Q8WZ42-3;Q8WZ42-10	2126;2126;2123;2123;13;1;1	2;2;2;2;0;0;0	2;2;2;2;0;0;0	Titin	TTN	tr|A0A0A0MRA3|A0A0A0MRA3_HUMAN Titin OS=Homo sapiens OX=9606 GN=TTN PE=1 SV=1;sp|Q8WZ42-9|TITIN_HUMAN Isoform 9 of Titin OS=Homo sapiens OX=9606 GN=TTN;sp|Q8WZ42-3|TITIN_HUMAN Isoform 3 of Titin OS=Homo sapiens OX=9606 GN=TTN;sp|Q8WZ42-10|TITIN_HUMAN Isofo	7	2126	2	2
A0A0A0MTS7;Q8WZ42-12;H7C195	A0A0A0MTS7;Q8WZ42-12	2489;2489;2	2489;2489;2	1;1;0	Titin	TTN	tr|A0A0A0MTS7|A0A0A0MTS7_HUMAN Titin OS=Homo sapiens OX=9606 GN=TTN PE=1 SV=1;sp|Q8WZ42-12|TITIN_HUMAN Isoform 12 of Titin OS=Homo sapiens OX=9606 GN=TTN	3	2489	2489	1
Q8WZ42-13	Q8WZ42-13	2486	1	0	Titin	TTN	sp|Q8WZ42-13|TITIN_HUMAN Isoform 13 of Titin OS=Homo sapiens OX=9606 GN=TTN	1	2486	1	0
Q8WZ42-2	Q8WZ42-2	2477	1	0	Titin	TTN	sp|Q8WZ42-2|TITIN_HUMAN Isoform 2 of Titin OS=Homo sapiens OX=9606 GN=TTN	1	2477	1	0
Q8WZ42-5	Q8WZ42-5	2453	1	0	Titin	TTN	sp|Q8WZ42-5|TITIN_HUMAN Isoform 5 of Titin OS=Homo sapiens OX=9606 GN=TTN	1	2453	1	0
Q8WZ42-6	Q8WZ42-6	353	103	103	Titin	TTN	sp|Q8WZ42-6|TITIN_HUMAN Isoform 6 of Titin OS=Homo sapiens OX=9606 GN=TTN	1	353	103	103
Q16851;A0A087WYS1;E7EUC7;C9J6Q0	Q16851;A0A087WYS1;E7EUC7	35;34;34;3	35;34;34;3	2;1;1;2	UTP--glucose-1-phosphate uridylyltransferase	UGP2	sp|Q16851|UGPA_HUMAN UTP--glucose-1-phosphate uridylyltransferase OS=Homo sapiens OX=9606 GN=UGP2 PE=1 SV=5;tr|A0A087WYS1|A0A087WYS1_HUMAN UTP--glucose-1-phosphate uridylyltransferase OS=Homo sapiens OX=9606 GN=UGP2 PE=1 SV=1;tr|E7EUC7|E7EUC7_HUMAN UTP--gl	4	35	35	2
Q16851-2;C9JNZ1;C9JVG3;C9JWG0;C9JUW1;C9JTZ5;F2Z3H1;C9J3M0;F2Z3P4;F8WC70	Q16851-2	34;14;12;10;9;8;6;2;2;2	1;1;1;1;1;1;1;1;1;1	1;1;1;1;1;1;1;1;1;1	UTP--glucose-1-phosphate uridylyltransferase	UGP2	sp|Q16851-2|UGPA_HUMAN Isoform 2 of UTP--glucose-1-phosphate uridylyltransferase OS=Homo sapiens OX=9606 GN=UGP2	10	34	1	1
