# Supplementary material for: Disease- and sex-specific differences in patients with heart valve disease: a proteome study
Source: Life Sci Alliance. 2023 Jan 10;6(3):e202201411. doi: 10.26508/lsa.202201411 (PMC9834574; doi:10.26508/lsa.202201411)
Supplement: Supplementary file 6 [file LSA-2022-01411_TableS6.xlsx]

## Sheet: imputed
Supplementary table 5 - log2 LFQ intensity values including imputed values.
Protein IDs	Majority protein IDs	Protein names	Gene names	Gene names1	log2 LFQ AS_01_M	log2 LFQ AS_02_M	log2 LFQ AS_03_F	log2 LFQ AS_04_F	log2 LFQ AS_05_F	log2 LFQ AS_06_F	log2 LFQ AS_07_F	log2 LFQ CON_01_M	log2 LFQ CON_02_M	log2 LFQ CON_03_M	log2 LFQ CON_04_M	log2 LFQ CON_05_M	log2 LFQ CON_06_M	log2 LFQ CON_07_F	log2 LFQ CON_08_F	log2 LFQ CON_09_F	log2 LFQ CON_10_F	log2 LFQ CON_11_F	log2 LFQ CON_12_F	log2 LFQ CON_13_F	log2 LFQ CON_14_M	log2 LFQ CON_15_M	log2 LFQ CON_16_M	log2 LFQ CON_17_F	log2 LFQ MR_01_F	log2 LFQ MR_02_M	log2 LFQ MR_03_M	log2 LFQ MR_04_M	log2 LFQ MR_05_M	log2 LFQ MR_06_M	log2 LFQ MR_07_M	log2 LFQ MR_08_F	log2 LFQ MR_09_M	log2 LFQ MR_10_F	log2 LFQ MR_11_M	log2 LFQ MR_12_M	log2 LFQ MR_13_M	log2 LFQ MR_14_M	log2 LFQ MR_15_F	log2 LFQ MR_16_F	log2 LFQ MR_17_M	log2 LFQ AS_08_M	log2 LFQ AS_09_F	log2 LFQ AS_10_F	log2 LFQ AS_11_F
A0A024R216;Q9Y3E1;H3BPM9;H3BPQ6	A0A024R216;Q9Y3E1	Hepatoma-derived growth factor-related protein 3	HDGFRP3	HDGFRP3	27.4198	27.4376	26.4571	28.1434	27.8457	27.9204	26.1548	27.0815	26.3612	27.871	27.3241	27.1502	27.6144	27.082	26.7172	26.3879	27.6655	26.3272	23.4036	26.8803	26.3687	27.7026	26.1193	26.8389	27.2244	26.8902	27.9509	27.2445	27.3112	24.422	26.8446	26.9887	27.8308	28.1693	27.6413	26.8035	25.7144	25.1136	28.63	28.1885	29.1527	27.0719	27.6143	27.3803	26.5405
A0A024R442;E7ETB3;Q9ULA0;F8WAN0;E5RJ35	A0A024R442;E7ETB3;Q9ULA0	Aspartyl aminopeptidase	DNPEP	DNPEP	30.1631	30.3927	30.4202	30.3784	30.1205	30.5359	30.2786	30.1518	30.3067	30.9293	30.8144	30.3993	30.8604	30.7732	30.5448	30.1141	30.9736	30.7283	30.7995	30.1383	31.1343	30.5268	30.2901	30.0479	30.7084	30.9597	30.8184	30.9007	30.6724	30.0239	30.7906	30.3559	31.0208	30.7508	30.1705	31.4428	30.5326	30.2357	29.9613	29.2716	30.6491	30.1873	30.071	29.8705	29.9995
A0A024R4E5;Q00341;Q00341-2;H0Y394;H7C0A4;C9JIZ1;C9J5E5;H7C2D1;C9JZI8;H7BZC3;C9JHZ8;C9JES8;C9JHS7;C9JT62;C9JK79;C9JBS3;C9JEJ8;C9JHN6;C9JMQ6;C9JQ82;C9JHS9;C9J739;H7C3D0	A0A024R4E5;Q00341;Q00341-2;H0Y394	Vigilin	HDLBP	HDLBP	30.0414	30.7063	29.2007	30.1547	30.2864	30.6237	29.772	29.7826	29.9822	29.4544	29.3649	29.5485	29.3565	31.8316	31.3278	31.6909	29.8582	29.2328	29.3594	30.6799	30.7932	30.1781	29.6734	30.7557	30.7232	29.9542	29.3157	29.4972	30.8478	30.4024	30.5434	30.5732	31.2155	30.3654	30.8766	30.2058	29.4902	28.7247	31.3217	29.4259	30.5078	29.2857	30.2421	30.3383	30.0748
A0A024R4K9;A0A087X266;Q9BXJ8-2;Q9BXJ8;A0A087WZA9;A0A087WV11;A0A087WZF4	A0A024R4K9;A0A087X266;Q9BXJ8-2;Q9BXJ8;A0A087WZA9	Transmembrane protein 120A	TMEM120A	TMEM120A	29.3636	28.7219	28.8036	27.9076	28.1906	29.1136	28.537	28.2294	28.384	28.5877	29.1372	28.5348	27.7691	27.9904	28.6959	28.1793	27.8536	28.5573	28.2049	28.6257	28.5516	27.7664	28.0862	28.4929	28.8117	28.349	29.0753	28.3549	28.737	29.2264	28.7078	29.0285	27.8994	28.3565	29.2095	28.7617	27.5528	29.0692	27.8486	28.5837	28.6515	28.2242	28.8486	28.0951	28.4185
A0A024R4M0;P46781;B5MCT8;C9JM19;F2Z3C0;A8MXK4	A0A024R4M0;P46781;B5MCT8;C9JM19	40S ribosomal protein S9	RPS9	RPS9	31.3478	31.2941	30.9853	31.4368	31.4912	31.6261	31.4514	31.8703	31.4406	31.7272	31.5734	31.5295	31.2167	32.2481	31.0093	32.4877	31.5003	31.6114	31.6366	32.2129	31.2665	31.4136	32.1055	32.0687	31.2014	31.1602	31.31	31.5073	31.5325	31.7103	31.715	31.7052	30.988	31.611	31.7117	31.7307	31.0174	31.44	31.664	31.2769	31.4492	31.189	31.1115	31.3872	31.1185
A0A024RA52;P25787;C9JCK5;H3BT36;H7C402	A0A024RA52;P25787;C9JCK5	Proteasome subunit alpha type;Proteasome subunit alpha type-2	PSMA2	PSMA2	31.3434	31.5583	30.9697	30.8364	30.9157	30.9809	31.5247	30.8224	31.5676	31.2214	31.4067	31.0394	30.3397	31.0358	31.098	31.1218	30.8255	30.7022	30.8293	30.941	31.3984	31.0647	30.3305	30.6674	31.0343	31.5487	30.2593	31.4402	31.2235	31.7729	31.5594	31.5829	30.0521	31.4566	30.4014	31.3575	30.9416	30.4708	30.3957	30.7767	30.5131	30.7324	29.9351	29.8191	30.4993
A0A024RCR6;A0A0G2JK23;P46379-2;P46379;P46379-3;A0A0G2JL47;P46379-5;P46379-4;F6S6P2;X6REW1;A0A0G2JJM1;A0A1B0GX79;F6WML8;F6VEM6;F6X9W3;F6U341;F6U1F2;F6XTU0;A0A0G2JJR8;F6TC96;H0Y710;H0Y4L1	A0A024RCR6;A0A0G2JK23;P46379-2;P46379;P46379-3;A0A0G2JL47;P46379-5;P46379-4;F6S6P2;X6REW1;A0A0G2JJM1	Large proline-rich protein BAG6	BAG6	BAG6	27.3691	27.7349	27.2533	27.472	26.6741	27.4318	26.6671	27.2367	27.1066	27.8585	27.5009	27.4397	26.6849	27.0075	26.5189	27.651	27.1874	27.1206	27.1959	27.4611	27.1759	27.7426	27.036	27.1647	27.2811	27.686	27.7141	27.4862	26.9472	28.307	27.8849	27.9142	28.2454	27.6996	28.0733	27.6589	27.1292	26.7345	26.6521	27.5765	27.4417	26.5045	27.5613	27.0317	27.1025
A0A075B6K5	A0A075B6K5	#N/A	IGLV3-9	IGLV3-9	27.5566	27.7601	27.741	26.6564	27.9645	27.9936	28.0235	28.1174	26.9853	25.0093	26.6331	28.9588	27.6615	28.1356	28.0896	27.193	26.3422	26.0156	28.2709	27.4817	27.7064	27.7854	27.9829	26.5157	28.6057	28.6102	28.1356	29.9768	29.1586	26.9301	28.5006	27.1679	30.6615	30.1667	28.1433	30.0484	26.4205	27.3431	29.8964	28.7672	28.8074	28.9171	25.8668	28.1971	27.7433
A0A075B6P5;P01615	A0A075B6P5;P01615	Ig kappa chain V-II region FR	IGKV2-28	IGKV2-28	26.9403	25.872	28.2671	27.5167	27.303	25.622	25.3422	26.5643	26.1574	27.4725	26.079	27.2932	27.6241	26.8201	28.1696	26.6618	27.916	24.5734	27.3853	27.1684	25.4372	27.8523	27.6682	26.4413	28.6045	29.8093	28.2599	21.4211	26.0731	25.5608	27.9201	26.5013	29.3564	26.2984	27.6971	30.126	27.8001	27.05	32.0589	28.1946	28.9039	26.9312	25.7778	23.9051	25.8799
A0A0C4DH68;A0A075B6R9	A0A0C4DH68;A0A075B6R9	#N/A	IGKV2-24	IGKV2-24	26.4514	23.6075	24.3389	27.2356	25.9725	24.1378	25.2926	27.0228	23.2323	24.9076	23.017	26.1979	25.8095	25.2754	24.1193	25.0185	28.1122	25.5479	24.7618	26.4647	27.267	27.6889	24.9809	23.492	26.5681	27.3839	28.1498	26.9621	27.7575	28.7521	26.8934	24.6136	28.0533	27.271	29.19	28.3495	25.0979	26.1915	30.4476	27.5214	27.3128	27.7853	28.6904	23.6025	27.7094
A0A075B6S2;A0A0A0MRZ7	A0A075B6S2	#N/A	IGKV2D-29	IGKV2D-29	30.4209	29.7484	28.4983	30.3453	29.6717	29.0345	28.1152	30.2254	28.2175	28.0508	27.7606	29.6546	30.2874	29.1613	27.8364	29.5366	28.9682	29.5028	29.5566	29.7243	27.6337	28.8073	29.2733	28.4963	28.5831	30.7215	28.9057	30.4187	29.1627	29.3639	30.6298	29.5399	32.0552	31.1219	29.7385	30.9858	29.2259	26.6802	32.9558	30.3006	28.691	31.1838	28.1746	31.2691	30.7317
A0A075B749;A0A087WX83;A0A087WVF8;Q5VU43-3;Q5VU43-13;Q5VU43-2;Q5VU43-12;Q5VU43-8;Q5VU43-9;H0YCY0;A0A087WWY1;A0A087WWI2;A0A087WVQ4;A0A087WWK4;A0A087X041;A0A087X0I1;E9PNE0;H0YCH7;A0A087X229	A0A075B749;A0A087WX83;A0A087WVF8;Q5VU43-3	Myomegalin	PDE4DIP	PDE4DIP	28.9971	23.14	23.0774	26.4702	24.4374	23.7178	22.5884	26.4614	28.1095	24.6831	24.5593	28.0007	24.4459	25.0393	25.5102	24.6917	24.465	22.2204	23.3362	28.0083	25.0611	27.8047	26.6312	22.9019	22.6203	23.3251	23.2381	23.595	23.4135	26.7451	26.0419	23.0205	24.3661	24.6017	24.4495	26.4073	23.7607	22.7762	25.1759	27.003	26.7662	26.45	22.9874	24.0795	22.7425
A0A087WSV8;P80303-2;P80303;E9PKG6;E9PLR0;E9PLE9;A0A2R8Y6G7;H0YD18;E9PJP3;E9PM22	A0A087WSV8;P80303-2;P80303;E9PKG6	Nucleobindin-2;Nesfatin-1	NUCB2	NUCB2	26.5094	27.1699	27.0173	27.1218	26.7461	27.3518	26.894	27.3932	26.9426	27.8048	27.5435	26.0276	26.966	27.698	27.0335	28.0982	27.2989	26.8412	27.5381	27.6265	28.0996	27.8177	27.2971	28.4668	26.9637	27.6156	27.587	27.3096	28.179	27.3075	27.5275	27.471	28.8614	26.5886	28.198	27.5039	27.1658	26.9196	27.2783	24.0388	27.9315	27.9992	28.1527	29.424	27.0488
A0A087WSY5;Q96IY4;Q96IY4-2	A0A087WSY5;Q96IY4;Q96IY4-2	Carboxypeptidase B2	CPB2	CPB2	27.9572	26.3474	23.807	27.679	27.9068	25.8892	27.6703	27.9355	25.1987	25.4002	23.9792	27.3322	22.8797	26.3148	22.8381	27.8389	26.7179	26.658	26.5184	27.2068	24.693	25.2335	26.6112	26.847	24.8528	28.6923	27.2866	27.7035	27.7512	26.5047	27.3981	27.4003	28.1702	26.9662	26.7246	27.7277	26.2807	27.8188	28.7605	27.3126	28.0472	23.4239	22.4855	25.346	26.106
A0A087X2I2;A0A087WT12;P36969-2;P36969;K7EJ20;K7EKX7;K7ENB4;R4GNE4;A0A0A0MTT1;A0A087X247	A0A087X2I2;A0A087WT12;P36969-2;P36969;K7EJ20;K7EKX7;K7ENB4;R4GNE4;A0A0A0MTT1	Glutathione peroxidase;Phospholipid hydroperoxide glutathione peroxidase, mitochondrial	GPX4	GPX4	29.4167	29.3955	29.6569	28.506	28.4865	28.8926	28.9404	28.9739	29.7354	28.9536	28.9288	28.9322	29.7742	29.2131	29.1669	29.0784	28.7296	29.0185	29.3817	28.9009	29.6815	28.9456	29.7777	29.3512	29.3005	28.9757	29.1504	28.6338	29.6936	29.3275	29.4247	29.2158	28.6611	29.3081	29.0959	28.4952	28.5586	29.3669	29.4395	29.5935	29.6402	29.0022	28.8254	29.5811	29.3407
A0A087WT47;P19237;G3V489;G3V4F8;G3V3L5	A0A087WT47;P19237;G3V489;G3V4F8;G3V3L5	Troponin I, slow skeletal muscle	TNNI1	TNNI1	32.3281	30.973	31.8833	30.7146	30.8482	30.5874	32.3429	23.6329	28.594	28.5062	31.5231	28.2328	28.9912	24.234	27.0649	24.4919	26.4161	30.259	25.2569	28.4998	29.9018	26.3218	22.8628	28.8294	29.9679	31.3716	30.5787	31.0262	29.3968	29.1273	30.5995	30.5292	29.3816	31.5329	31.5617	30.7321	32.5113	26.072	29.0792	32.7145	31.1891	31.6627	31.0875	29.9491	30.5323
A0A087WTA8;P08123	A0A087WTA8;P08123	Collagen alpha-2(I) chain	COL1A2	COL1A2	32.6524	32.6267	33.3016	32.8981	33.152	33.3009	32.1305	30.1627	31.4046	32.2245	32.7028	32.5339	33.0204	32.365	30.8048	32.6829	31.4447	32.6271	31.7478	31.4322	30.4089	31.6738	32.0142	32.3181	31.4948	32.4646	32.3485	32.846	33.5882	32.3533	31.6421	33.3209	34.9052	31.8274	34.3978	32.1113	32.0499	31.5953	34.7013	34.0155	32.1523	32.8909	32.6506	34.4261	33.6539
A0A087WTF0;A2A3K4-2	A0A087WTF0;A2A3K4-2	Protein tyrosine phosphatase domain-containing protein 1	PTPDC1	PTPDC1	22.8488	22.8249	24.4797	24.7448	18.7374	25.0568	24.8332	22.8449	23.7506	23.0839	22.3046	23.2867	23.5258	23.1395	22.9583	25.2035	24.502	23.5713	23.1047	23.2575	23.9214	22.6419	21.3533	24.3127	23.1731	21.7362	24.4381	24.1185	24.3078	23.3515	21.0935	23.5919	21.5636	20.9544	22.6863	20.194	24.0907	23.1085	20.293	24.4544	23.8127	23.3649	24.1139	25.7902	24.1352
A0A087WTJ2;Q96F15;Q96F15-2	A0A087WTJ2;Q96F15;Q96F15-2	GTPase IMAP family member 5	GIMAP1-GIMAP5	GIMAP1-GIMAP5	23.6586	24.9125	26.6505	25.0219	22.1988	26.2554	25.0458	25.5911	25.0456	25.9702	25.4902	25.934	23.5229	25.3695	25.8116	26.8834	25.2278	25.6846	26.1227	25.6227	26.9009	25.8041	25.3502	26.2246	25.908	24.6186	27.2241	24.3944	23.1043	25.3098	25.4062	24.0681	25.9193	25.7914	24.1447	25.0134	27.335	26.5142	27.8798	26.8804	26.8577	25.7805	26.8785	23.8423	26.4849
A0A087WTU1;Q15345-3;A0A087X0S7	A0A087WTU1;Q15345-3;A0A087X0S7	Leucine-rich repeat-containing protein 41	LRRC41	LRRC41	29.5555	24.0008	28.7134	28.6194	29.2128	27.3926	26.7972	23.0847	24.5369	26.7848	28.4833	23.9286	27.8703	27.11	25.3345	24.651	24.3116	22.0085	24.2428	23.8037	23.5893	23.653	24.3506	23.2303	27.763	23.4633	24.3968	27.1467	22.4985	27.9106	26.7402	28.2897	29.0712	28.3373	28.8217	24.296	25.2574	27.9446	24.6006	28.4921	28.7567	27.4278	23.2829	27.2369	28.5297
A0A087WU02;Q96RQ1;H0YI50;F8VPA6;H0YI58;F8W0R1;F8VR88;F8VUZ2;H0YHS0;H0YHJ8	A0A087WU02;Q96RQ1;H0YI50;F8VPA6	Endoplasmic reticulum-Golgi intermediate compartment protein 2	ERGIC2	ERGIC2	26.3266	24.1294	25.404	23.7418	25.4338	25.2989	22.3233	24.6883	23.4474	22.4894	23.4611	24.1841	22.5466	27.1413	26.7073	26.5061	25.7688	25.2894	25.1855	25.3654	25.5835	24.1395	23.6908	23.5945	26.3495	25.6869	23.2418	26.2297	25.3679	25.3396	24.3258	24.876	23.3483	24.8515	26.6286	26.5656	23.9275	23.4989	24.0728	24.9087	25.5847	22.7384	23.6312	22.7646	25.2962
A0A087WU07;Q5TGZ0;Q5TGZ0-2;R4GNA1;A0A3B3IRY5;R4GMM1;R4GMY4	A0A087WU07;Q5TGZ0;Q5TGZ0-2	MICOS complex subunit MIC10	MINOS1	MINOS1	28.9786	28.8079	25.2407	28.3223	25.2619	28.6927	28.5735	28.3373	28.8948	24.3881	28.4266	28.3675	27.1882	28.0461	28.1229	27.7935	28.4909	29.0974	27.7279	28.5159	28.2899	28.8093	28.341	28.4706	27.7455	26.933	26.9634	28.1503	23.2058	28.0096	26.7397	27.5338	26.4529	28.722	26.8145	27.9694	23.8855	26.2626	27.0771	28.4447	28.2351	28.3742	27.9808	28.3247	28.6993
A0A087WU53;Q9H0U3;Q9H0U3-2	A0A087WU53;Q9H0U3	Magnesium transporter protein 1	MAGT1	MAGT1	27.6613	26.3527	28.0858	27.2477	27.6471	27.4434	27.3219	27.4972	26.6827	26.752	27.278	27.4889	27.2744	26.6975	26.6996	28.7255	27.3446	27.459	26.7394	27.5891	27.3767	26.7691	26.9595	27.7949	26.9337	27.5749	27.809	27.7811	28.5125	26.5291	27.5867	27.0376	27.5911	27.5956	27.5367	26.4428	25.915	27.2207	25.4708	27.9534	27.6472	25.9815	25.6794	27.4386	26.4232
A0A087WUC6;E9PI68;Q15005;E9PL01;E9PRB9;H0YE04	A0A087WUC6;E9PI68;Q15005;E9PL01;E9PRB9	Signal peptidase complex subunit 2	SPCS2	SPCS2	27.3472	26.9039	27.6356	26.9957	27.1936	27.7783	27.5888	26.4008	26.7001	27.6651	24.3669	26.8092	26.5363	26.3908	28.0249	27.8888	26.4129	26.6842	26.6861	27.8036	27.6497	26.3714	26.8465	27.7631	25.6995	26.2642	26.0215	26.954	26.9391	27.1914	26.0293	26.6071	26.5359	27.277	26.9563	26.8595	24.5249	27.3654	27.3641	24.5621	23.384	26.0952	27.3019	28.0407	26.5777
J3QTS8;A0A087WUI4;A0A087X1U0;Q15661-2;Q15661;P20231;A0A0C4DGM1;A0A0C4DFZ7;Q9BZJ3-2;Q9BZJ3;A6NIE9	J3QTS8;A0A087WUI4;A0A087X1U0;Q15661-2;Q15661;P20231;A0A0C4DGM1	Tryptase alpha/beta-1;Tryptase beta-2	TPSAB1	TPSAB1	30.2638	29.8792	30.5578	26.0086	27.6484	28.4985	26.3071	27.0807	27.6024	24.0009	30.6735	28.3827	28.6711	28.3073	27.6684	27.7091	28.1668	28.6346	29.9802	28.8916	30.2912	28.8676	30.491	29.2548	27.3862	30.5016	30.0806	29.8797	30.6785	30.382	29.5367	29.9599	31.6941	29.2175	32.0602	30.6299	29.46	29.3899	30.1642	29.2708	30.5966	28.6551	26.8633	30.789	28.3884
A0A087WUK2;O14979;REV__Q8N0S2-3;REV__Q8N0S2-2;REV__A0A0B4J1R9;REV__Q8N0S2	A0A087WUK2;O14979	Heterogeneous nuclear ribonucleoprotein D-like	HNRNPDL	HNRNPDL	30.3994	29.9666	29.9485	29.9414	29.5184	29.8882	29.4617	29.8319	29.2055	29.6565	29.5981	29.4758	29.5673	30.016	29.3666	30.0596	29.722	29.5016	30.1473	29.3318	30.5791	29.8747	29.3177	29.1074	29.9031	30.0464	29.9661	30.2082	30.4095	29.6632	29.7138	29.6126	30.0256	30.0748	29.9636	30.431	29.4759	30.1229	29.3938	30.4611	29.8208	30.1284	30.0144	29.9813	29.4882
A0A087WUQ6;P07203;A0A2R8Y6B6;P07203-2	A0A087WUQ6;P07203;A0A2R8Y6B6	Glutathione peroxidase;Glutathione peroxidase 1	GPX1	GPX1	30.4299	30.4702	31.1147	30.5758	30.7793	30.6282	30.7837	30.2929	30.584	30.692	30.2842	30.1947	30.5582	30.686	30.7296	30.9099	30.6009	30.337	30.6234	30.633	30.8533	30.5774	30.3115	30.617	30.5227	30.8795	30.9884	30.8192	31.4454	30.9817	30.8832	30.3708	30.8866	30.4628	30.6461	30.7854	30.1074	31.0212	31.1292	29.8712	30.9579	30.7406	30.6414	30.333	30.1455
E7ETK0;A0A2R8Y849;A0A087WUS0;A0A2R8YD14;P62847-2;P62847-3;P62847;P62847-4;A0A2R8Y8A0	E7ETK0;A0A2R8Y849;A0A087WUS0;A0A2R8YD14;P62847-2;P62847-3;P62847;P62847-4	40S ribosomal protein S24	RPS24	RPS24	28.4269	27.5875	28.1163	28.976	28.4941	28.8853	28.8558	28.9484	28.7603	29.7474	29.7243	28.7409	28.7004	30.2245	30.5004	30.4249	29.4589	29.2917	28.8522	29.7181	29.7167	29.3071	29.1292	30.0194	29.5748	29.8035	28.6336	29.3223	29.4258	29.6157	29.6768	29.1816	28.9234	29.4162	29.1345	29.8399	28.9645	28.8971	29.3085	29.253	29.5123	28.725	28.0549	27.107	28.0978
A0A087WUT6;O60841	A0A087WUT6;O60841	Eukaryotic translation initiation factor 5B	EIF5B	EIF5B	28.5427	28.1627	27.0669	27.786	27.8706	28.5674	28.7071	28.3157	28.1638	27.7462	28.0633	28.4936	28.3747	30.0144	27.5666	29.2164	28.6111	27.3064	27.3617	29.2356	28.0183	28.1236	28.5904	28.3016	28.6627	28.5251	27.6504	27.7049	28.0453	28.831	27.9594	27.5016	27.7012	27.9865	28.7071	29.4771	25.9425	27.8674	28.2497	27.7826	28.1616	27.3701	28.4465	26.6798	28.0845
A0A087WUW9;Q9NXU5;A0A0B4J222;R4GN67	A0A087WUW9;Q9NXU5;A0A0B4J222	ADP-ribosylation factor-like protein 15	ARL15	ARL15	23.3126	24.2558	25.2624	23.7352	23.7449	26.4043	24.9413	25.8132	22.8684	26.381	25.9792	26.5509	25.4001	24.9679	26.247	24.7572	25.6092	25.097	23.8806	25.4483	25.8717	26.8413	26.3303	25.5511	24.84	26.0764	26.4793	23.7958	25.9904	25.5332	25.5095	24.3757	26.1789	25.6444	25.4668	26.1973	24.975	25.4167	25.9023	25.1332	25.8595	26.3787	25.4282	25.892	25.7149
A0A087WV05;Q99417;A0A0D9SEI7	A0A087WV05;Q99417	C-Myc-binding protein	GJA9-MYCBP	GJA9-MYCBP	27.8709	27.7615	31.0548	27.4393	27.1417	27.0954	27.3519	27.9682	24.9772	27.0655	26.057	27.8016	23.8761	28.6612	26.5966	27.0676	27.7576	27.1795	27.4367	27.6384	25.3795	27.9559	21.9391	24.2381	26.8073	25.5721	23.9676	27.4184	25.318	28.8102	27.1691	28.0526	28.7421	27.5237	28.464	32.5712	26.4893	26.9326	26.6555	25.2199	26.8199	23.6875	24.1106	25.9484	28.3152
A0A087WVA1;P62341;Q6IAK0;F8WBD0	A0A087WVA1;P62341;Q6IAK0	Selenoprotein T	SELENOT	SELENOT	25.8251	25.7948	25.5839	25.982	26.3502	26.299	25.7466	26.268	26.2231	25.6996	25.8764	23.7403	25.4756	27.0082	26.4962	26.0521	25.9951	25.8848	24.7578	26.1569	25.8861	26.8257	25.3603	25.5571	25.8985	26.6346	25.7231	25.4231	25.9901	26.0243	23.1893	25.6783	24.6128	23.9794	25.3959	25.6183	23.345	25.0877	25.197	25.248	26.4838	26.091	26.8913	26.1883	26.1008
A0A087WVP1;Q14517;D6RCE4	A0A087WVP1;Q14517	Protocadherin Fat 1;Protocadherin Fat 1, nuclear form	FAT1	FAT1	29.1339	28.301	28.2174	28.8467	29.1693	28.6377	28.4119	29.5625	28.5898	29.1681	28.8657	29.2704	27.7624	28.2619	27.0898	28.9661	28.47	28.9951	28.0923	29.0854	28.0274	28.389	29.0703	28.1848	28.0481	28.1275	25.8814	27.759	28.0537	28.6835	28.0087	28.7627	28.1202	28.0565	28.6677	27.9251	29.5399	28.344	26.3548	28.0632	28.159	27.8568	29.9404	29.9892	29.3126
A0A087WVS8;Q70IA6;Q70IA6-3;Q70IA6-2	A0A087WVS8;Q70IA6;Q70IA6-3;Q70IA6-2	MOB kinase activator 2	MOB2	MOB2	23.237	25.3305	25.8567	25.726	25.8927	24.8812	25.8603	23.5709	25.1977	23.9415	25.0362	25.8347	23.2399	25.2037	25.9307	26.0398	23.5973	25.1803	28.9906	24.1073	26.0131	24.6308	25.9843	25.3922	25.8205	24.0951	23.6107	26.2796	25.8101	25.3771	24.9335	23.0752	23.3976	25.2153	25.4897	26.1101	25.4502	24.5613	26.3627	23.2622	25.6756	25.9553	25.9228	25.2252	25.4804
A0A087WWF1;Q8WWX9	A0A087WWF1;Q8WWX9	Selenoprotein M	SELENOM	SELENOM	22.6317	24.4874	24.5966	25.3921	24.432	23.0114	24.0265	24.0962	24.9909	24.0445	24.3757	24.8359	24.8516	23.4288	23.2179	23.4363	24.1699	23.0777	22.7201	21.944	23.8941	22.8605	23.3136	23.9362	25.0944	24.6896	25.4002	24.2625	25.0211	23.9092	25.354	25.1756	24.5541	23.92	23.8411	22.8155	23.0172	24.598	26.1337	24.4852	24.4299	24.3619	23.8888	21.1131	22.8534
A0A087WWM4;F8WAN9;Q9P2T1;H0YMB3;H0YNJ6;Q9P2T1-3;Q9P2T1-2;H0YLV5;H0YLB8;H0YNH0;H0YK13;H0YMR9;H0YK71;H0YMV5;H0YN22;A0A0B4J281;H0YMG3;H0YKK3;H0YN74;H0YMW6;H0YL68;H0YKE1	A0A087WWM4;F8WAN9;Q9P2T1;H0YMB3;H0YNJ6;Q9P2T1-3;Q9P2T1-2;H0YLV5;H0YLB8	GMP reductase;GMP reductase 2	GMPR2	GMPR2	25.6927	23.9504	24.6884	26.5922	25.4216	25.8924	25.2438	26.0209	24.3264	25.225	25.3317	26.1569	26.0504	26.2253	25.736	25.3502	26.0107	25.0101	25.6155	26.3698	26.92	25.8798	26.5257	26.1755	26.7837	27.2003	27.4001	25.7027	24.1496	25.784	27.3464	24.9199	25.0355	25.2617	24.7351	26.9682	27.837	26.8691	26.9291	25.8315	23.7877	23.5317	23.7419	22.8518	25.9084
A0A087WWM6;O43272;E7EQL6;O43272-2;O43272-1;C9JIW4;H7C363	A0A087WWM6;O43272;E7EQL6;O43272-2;O43272-1	Proline dehydrogenase 1, mitochondrial	PRODH	PRODH	23.9416	23.9844	23.5266	23.3627	22.3091	25.0907	23.0642	26.2282	26.1419	26.6202	21.7134	23.8987	26.5444	25.5298	25.2454	24.2611	22.3968	25.5338	25.7431	24.4688	26.2273	23.2172	24.8305	23.6166	22.0216	23.7157	25.5515	23.1717	26.5115	24.0684	25.8991	25.3969	23.9618	26.4257	24.1535	23.7826	24.8914	28.4236	23.8395	27.0948	26.5555	23.2639	23.5917	25.4981	23.7275
A0A087WX02;F8WB74;P63302	A0A087WX02;F8WB74;P63302	Selenoprotein W	SELENOW	SELENOW	26.568	26.4538	27.3768	27.4205	26.5925	26.6512	25.0215	26.8643	27.2505	27.7046	28.0492	27.6009	27.2326	25.8382	27.2201	26.5251	27.5886	27.647	27.4386	27.0855	25.9273	27.7757	27.1064	27.2328	28.1971	26.3796	27.4171	27.5125	26.0092	25.7807	26.9497	26.9593	24.1388	27.0947	26.5764	25.9375	27.3967	27.674	27.1521	29.2364	27.8866	27.7096	27.4543	27.0354	26.2934
H3BS47;A0A087WX34;H3BV03;Q68CZ1-2;Q68CZ1;H3BPF5;I3L2P2;I3L1B5;H3BPS4	H3BS47;A0A087WX34;H3BV03;Q68CZ1-2;Q68CZ1;H3BPF5	Protein fantom	RPGRIP1L	RPGRIP1L	27.7432	30.8637	24.662	27.3678	30.2359	23.7123	24.0358	29.6557	31.12	29.9677	30.7002	22.3747	29.3295	25.8341	29.5558	24.5256	24.2257	24.5627	23.4761	23.8706	29.6722	30.569	28.7354	29.3956	31.1367	30.2991	31.0683	29.8052	29.0994	30.8826	23.4617	30.9494	24.5952	31.2527	30.7572	31.3986	23.549	31.9964	30.6288	31.0496	29.8522	28.734	27.298	27.4058	27.388
A0A087WXC5;E7ESZ7;O95299;O95299-2;C9J6X0;Q8N1B9;H7C2W5;H7C1Y7;H7C2X4	A0A087WXC5;E7ESZ7;O95299;O95299-2	NADH dehydrogenase [ubiquinone] 1 alpha subcomplex subunit 10, mitochondrial	NDUFA10	NDUFA10	34.5089	34.6694	34.2207	34.3439	34.2081	34.2338	34.5967	34.8264	35.0296	34.9663	35.2239	34.9547	34.6457	34.2565	34.8802	34.7142	35.0238	34.8392	34.7839	34.8624	34.8387	34.9711	34.8922	34.742	34.5079	34.5916	34.5818	34.6118	34.5584	35.2052	35.2507	34.7121	33.5683	34.7076	34.0346	34.6121	35.0398	34.6136	33.913	34.3401	34.6267	33.9649	34.1013	34.0516	33.8397
J3QSS3;A0A087WXK5;Q9BZC7;Q9BZC7-3;Q9BZC7-2;E9PGB2;H0Y8C9;H0Y8D6;H0Y8E3	J3QSS3;A0A087WXK5;Q9BZC7;Q9BZC7-3;Q9BZC7-2	ATP-binding cassette sub-family A member 2	ABCA2	ABCA2	23.0813	26.2633	23.1257	22.5148	25.7189	26.1092	24.3251	25.6366	26.5241	26.9154	25.4531	25.1478	24.5246	23.5533	22.7236	25.728	23.6256	23.8316	20.9925	25.0974	24.0234	25.9852	26.0125	26.3122	24.5834	25.834	23.2701	23.012	24.0429	24.287	22.8183	22.5586	26.2286	24.2742	24.1308	25.9181	22.6054	23.4258	24.2343	23.7909	24.0125	24.9742	24.7132	26.325	26.7784
A0A087WY55;Q9NP79;Q5TGM0;Q9NP79-2	A0A087WY55;Q9NP79;Q5TGM0;Q9NP79-2	Vacuolar protein sorting-associated protein VTA1 homolog	VTA1	VTA1	28.4032	28.1204	28.6658	28.097	27.9959	28.125	28.2561	28.2935	28.3466	28.2928	28.4233	28.092	28.3876	27.8191	27.7878	28.4533	28.4846	28.4731	28.2792	28.3201	28.4237	28.3047	28.1783	28.1195	27.7937	28.457	27.2038	28.1124	28.2222	28.9371	28.25	28.6708	29.3743	28.3474	29.022	28.604	28.3811	27.9979	26.8979	26.938	28.3859	28.4865	28.7659	28.2647	28.3638
A0A087WY71;E9PFW3;Q96CW1-2;Q96CW1;C9JJ47;C9JJD3;C9JPV8;H7C4C3	A0A087WY71;E9PFW3;Q96CW1-2;Q96CW1;C9JJ47	AP-2 complex subunit mu	AP2M1	AP2M1	29.5519	29.7693	29.8086	29.3699	29.8088	29.4217	29.847	28.8062	29.0214	29.87	29.6493	29.1943	29.2508	29.2801	29.508	29.7393	30.0628	28.9285	29.081	29.9936	30.0176	29.9595	29.7968	29.8357	30.1625	29.6903	30.4268	30.1258	30.2675	29.2648	30.2543	29.3262	29.5561	29.5232	29.9178	30.3851	30.1204	29.9893	30.1998	29.8119	29.6399	29.205	29.4326	28.292	29.1383
A0A087WY85;P61077;P61077-3;D6RAH7;P61077-2;D6RAW0;D6RA11;D6RFM0;P62837-2;D6R9F6;D6R933;D6RGD0;D6R980;D6RIZ3	A0A087WY85;P61077;P61077-3;D6RAH7;P61077-2;D6RAW0;D6RA11;D6RFM0;P62837-2	Ubiquitin-conjugating enzyme E2 D3;Ubiquitin-conjugating enzyme E2 D2	UBE2D3	UBE2D3	29.2362	29.2011	28.9003	28.5104	28.1438	28.7034	29.5503	28.6861	28.3699	28.182	28.6969	28.3675	28.392	28.6645	29.5866	28.5113	29.025	26.8415	28.2603	28.6409	29.4919	29.2718	28.9793	28.7778	28.402	29.1521	28.7948	29.5937	29.3339	28.6682	28.8351	28.5176	28.7447	29.4726	29.2399	29.1093	28.5162	29.5399	23.4905	27.6554	30.1174	29.7061	29.6868	28.176	27.7139
A0A087WYF7;Q6UXV4;A0A087WUX8	A0A087WYF7;Q6UXV4;A0A087WUX8	MICOS complex subunit MIC27	APOOL	APOOL	31.8771	32.1204	32.2852	32.0648	32.2934	32.4052	32.5943	31.9328	32.3589	32.3873	32.1622	32.6983	32.4822	31.866	32.1514	32.1736	32.2409	32.5559	32.467	32.3111	32.2734	32.1613	31.8305	32.6133	32.4313	32.21	32.3699	32.2473	32.7275	32.4966	32.6888	32.5148	32.2108	32.2006	32.3484	32.0596	31.0172	32.3863	31.6025	32.3651	32.4833	32.0258	31.8391	31.9222	31.6568
A0A087WYN9;Q7Z478;H0Y8L1	A0A087WYN9;Q7Z478	ATP-dependent RNA helicase DHX29	DHX29	DHX29	23.5424	23.6329	24.447	25.3592	24.0851	23.0603	24.1042	24.9424	24.1036	22.4248	24.6362	22.8314	26.6738	27.2129	26.7441	25.1142	24.6592	23.3949	26.4014	25.6823	25.638	25.938	25.5596	26.772	22.4466	24.1155	26.5623	25.1343	25.6815	23.7288	26.1668	22.581	24.8857	25.0265	25.8768	24.9755	24.3209	22.7012	24.51	23.0845	20.4931	24.2838	26.0148	24.1634	23.9027
A0A087WYR0;P09132;A0A2U3TZN1;A0A087WWU9;D6RBG4;A0A2R8Y4M3;P09132-2	A0A087WYR0;P09132;A0A2U3TZN1;A0A087WWU9	Signal recognition particle 19 kDa protein	SRP19	SRP19	22.7899	24.5172	21.897	24.8491	20.8994	26.5465	24.2358	23.6674	24.5437	22.8943	25.077	23.2541	22.6906	24.1131	23.9517	26.0091	23.3271	24.5409	24.4593	25.5256	24.8707	23.6781	24.586	23.7319	23.2609	25.1364	24.989	21.1782	24.7916	22.8132	24.6512	24.1223	25.4359	25.0535	23.4197	25.3886	24.3705	23.1947	25.439	23.7423	23.954	25.862	25.8055	25.3298	25.4071
A0A087WZ62;Q9H6U8;Q9H6U8-3;H0YCW6;Q9H6U8-2;Q9H6U8-4;A0A087WTZ3;A0A087WVC0;A0A087WZY8;H0YEX8;A0A087WX16;A0A087WV58	A0A087WZ62;Q9H6U8;Q9H6U8-3;H0YCW6;Q9H6U8-2;Q9H6U8-4	Alpha-1,2-mannosyltransferase ALG9	ALG9	ALG9	24.6474	27.9626	23.8054	27.5846	27.287	28.0737	26.6174	27.6479	26.0986	28.1075	23.7067	23.3992	25.5672	24.9982	26.0916	24.2451	23.1052	23.9737	22.9182	23.9763	23.9677	23.2306	25.7785	25.9066	23.7687	22.0105	28.4436	24.6378	25.0033	27.9585	23.025	24.593	24.0182	28.0579	26.2399	23.8536	23.729	24.518	24.2226	22.1193	24.8604	24.6828	24.0541	24.0454	24.8463
A0A087WZE9;Q15651;Q15651-2	A0A087WZE9	#N/A	HMGN3	HMGN3	26.1146	25.0175	26.9682	26.4538	26.3694	25.6225	26.0302	24.8578	26.8193	26.7294	27.6649	27.2208	27.4209	25.8183	27.5659	26.1489	27.5604	27.7875	28.1202	26.9129	27.7234	28.0171	26.9705	27.1229	27.3063	25.9623	27.2339	26.9669	27.0685	25.6563	26.8129	26.7357	27.2872	27.8488	27.1184	27.0601	28.5137	27.1714	28.0198	28.6848	28.0577	26.9102	27.2631	27.5838	27.5903
A0A087WZN1;O43837;A0A087X2E5;O43837-3;A0A0D9SG66	A0A087WZN1;O43837;A0A087X2E5	Isocitrate dehydrogenase [NAD] subunit, mitochondrial;Isocitrate dehydrogenase [NAD] subunit beta, mitochondrial	IDH3B	IDH3B	33.6196	33.1636	33.6388	33.4174	33.4958	33.7722	33.6053	33.7025	34.0973	33.3099	33.2486	33.4108	33.2316	33.1528	33.3832	33.3274	33.7253	33.6237	33.5352	33.7378	33.6686	33.4489	32.7939	33.5392	33.2797	33.7732	33.5239	33.4096	33.5888	33.8836	34.137	33.9065	33.9256	33.45	33.2206	33.3628	32.4719	33.6693	33.4716	33.3574	33.2688	32.4701	32.6406	33.3388	32.7965
A0A087WZT2;Q6UX53	A0A087WZT2;Q6UX53	Methyltransferase-like protein 7B	METTL7B	METTL7B	26.4508	24.0425	26.2699	24.8171	23.3703	26.6942	23.1883	25.6849	26.0122	26.177	24.5387	24.5588	23.9891	27.3539	25.8442	27.9507	24.607	24.4048	27.3743	24.331	26.8916	23.3206	26.7767	23.5615	24.137	22.3863	25.2092	23.6848	24.6077	27.1891	26.6768	26.4894	26.5583	24.4991	23.4517	26.4488	26.4142	25.2699	28.3269	25.2318	26.5173	24.2668	25.9711	25.0786	23.4874
F5H3Q5;A0A087WZY5;F5H851;A8MXH5;Q14031-2;Q14031	F5H3Q5;A0A087WZY5;F5H851;A8MXH5;Q14031-2;Q14031	Collagen alpha-6(IV) chain	COL4A6	COL4A6	28.3637	28.8345	29.0045	29.1445	29.0425	29.2028	28.0788	25.5347	27.1503	27.2353	26.7384	23.8509	28.1768	23.9829	24.4072	28.0921	24.3871	27.4339	25.2104	24.8046	24.2943	24.094	27.1961	26.349	24.6869	24.2441	27.5828	27.4261	28.2486	29.289	25.1855	29.2192	30.5277	27.8819	29.4477	26.983	24.8173	26.3306	28.5013	28.1829	23.1089	29.1783	27.8163	30.6472	29.5437
A0A087X020;Q9Y3A5;F8WE72	A0A087X020;Q9Y3A5	Ribosome maturation protein SBDS	SBDS	SBDS	30.0742	30.2723	30.6048	30.2349	30.5256	30.4145	29.8636	30.0869	30.1498	30.2467	30.4553	30.2866	29.9643	30.5032	30.1425	29.7392	29.9286	29.8866	29.6972	30.2746	29.5024	29.5423	30.2384	30.431	30.0125	29.8368	30.1988	29.9989	29.8041	30.4424	30.3958	29.9877	30.5761	30.1533	30.297	29.9495	29.9574	30.1682	29.4871	30.1854	30.4614	30.1195	30.3126	30.5963	30.3776
A0A087X094;P01160	A0A087X094;P01160	Natriuretic peptides A;Atrial natriuretic factor	NPPA	NPPA	23.9168	25.2978	21.4501	28.9417	30.1968	22.8539	27.2244	25.3987	24.8173	24.7574	22.8896	24.1123	22.4649	22.9837	22.9176	24.6005	24.2598	21.6104	22.9205	22.7481	26.6976	24.8	24.6384	23.8151	30.2062	27.7912	25.2969	23.4387	28.1528	23.2208	22.9152	27.1384	31.7626	25.8111	25.1289	27.2483	24.2852	24.0238	35.0303	23.7742	25.4664	23.6752	23.9396	23.8493	26.7827
A0A087X0D5;P09668;E9PKT6;A0A3B3IRM7	A0A087X0D5;P09668	Pro-cathepsin H;Cathepsin H mini chain;Cathepsin H;Cathepsin H heavy chain;Cathepsin H light chain	CTSH	CTSH	26.148	26.4794	27.1242	23.6018	24.8983	23.2783	23.6686	26.1856	26.823	24.9024	25.4025	26.1541	26.3184	25.0108	26.7419	27.3129	26.7385	26.2754	27.9827	25.8046	26.8212	26.8699	26.6742	23.9237	25.9024	26.055	26.6453	23.2359	26.3888	24.3919	26.8824	24.0365	27.6607	26.637	26.5825	26.1802	23.4449	26.4332	25.8292	24.9619	22.0928	24.3203	25.0189	22.984	25.7934
A0A087X0K0;P39059	A0A087X0K0;P39059	Collagen alpha-1(XV) chain;Restin;Restin-2;Restin-3;Restin-4	COL15A1	COL15A1	32.2925	32.0839	32.2478	32.4735	32.1111	32.379	31.8671	32.3472	32.1916	32.6611	32.7284	32.7013	32.0619	32.6156	32.1856	31.8873	32.6545	32.6044	32.3947	31.7825	32.4841	32.8382	32.6264	31.9815	32.3926	32.6888	32.5922	32.4358	32.5239	32.5806	32.6474	32.4563	33.1133	32.8098	32.4698	32.9667	32.0399	32.1356	32.5072	32.5222	32.8267	31.9353	31.6796	32.408	31.7372
A0A087X0M8;O00533;O00533-2;H7C0J0;C9J905;C9JH37;C9JW79	A0A087X0M8;O00533;O00533-2	Neural cell adhesion molecule L1-like protein;Processed neural cell adhesion molecule L1-like protein	CHL1	CHL1	23.7388	22.7539	22.6189	23.9031	24.5565	23.1764	22.3187	23.6793	23.686	24.5788	26.4066	26.0293	24.4103	25.7151	24.4439	23.9586	23.7733	25.0533	23.9376	24.4357	23.0784	23.7093	24.1401	24.58	22.7022	25.1034	23.5581	23.4599	24.5778	22.643	23.4055	23.3028	25.1672	24.3117	24.5471	23.5556	26.6284	24.3135	23.2829	25.471	23.3483	25.0703	25.2252	24.6235	23.812
A0A087X0P0;Q02224-3;Q02224-2;Q02224;D6RBW0	A0A087X0P0;Q02224-3;Q02224-2;Q02224	Kinesin-like protein;Centromere-associated protein E	CENPE	CENPE	22.884	23.317	26.5368	24.3886	23.3794	27.704	26.0229	22.7729	23.6046	26.271	26.1884	23.2196	22.7104	24.6868	25.9846	25.6661	26.1702	23.6561	23.2075	23.276	25.7778	23.8654	23.9129	26.0333	25.6185	26.6153	27.745	23.4929	26.432	24.8984	26.8792	25.1505	25.3449	26.8484	23.9004	26.481	23.199	27.3022	26.8204	25.3613	27.2279	23.1724	24.3415	27.5242	23.5282
A0A087X0R6;Q9UMY4-2;Q9UMY4;Q9UMY4-3	A0A087X0R6;Q9UMY4-2;Q9UMY4;Q9UMY4-3	Sorting nexin-12	SNX12	SNX12	26.6783	26.1593	24.9571	25.936	26.1463	25.7157	25.325	25.3115	26.3899	23.836	28.1852	25.6059	26.4548	26.4182	26.2142	25.244	26.6109	26.4191	26.8797	26.7356	26.3654	27.2975	25.9508	26.0753	25.1545	26.1902	25.78	25.4419	22.7408	26.6409	24.1506	24.0062	26.8808	25.3832	27.0547	24.9241	23.8984	26.8102	24.3776	24.5467	26.8206	25.339	27.2192	26.7402	26.6943
A0A087X0T3;A7E2Y1;Q5JW47;Q5JW45;A7E2Y1-2	A0A087X0T3;A7E2Y1	Myosin-7B	MYH7B	MYH7B	27.2228	28.9897	27.9842	25.879	26.9099	25.7115	25.8504	24.5659	27.9686	26.3226	26.0882	27.0531	26.0928	28.1983	29.2428	29.7954	27.563	28.2199	27.584	26.4226	26.4683	26.5721	25.8815	27.1496	26.7779	27.4761	26.8105	23.9744	26.3786	24.2533	23.2748	25.4238	26.7971	27.3677	24.6972	25.5738	24.6077	23.0841	24.8799	27.0985	25.9099	26.5157	27.8356	28.8362	26.33
A0A087X0W7;A0A087WT95;P49753;P49753-2	A0A087X0W7;A0A087WT95;P49753;P49753-2	Acyl-coenzyme A thioesterase 2, mitochondrial	ACOT2	ACOT2	31.878	32.4061	31.8157	32.3088	32.3606	32.429	32.8313	32.3401	32.5715	33.9017	31.7216	31.4703	33.5509	33.2363	32.8752	32.4348	32.1075	32.8605	33.0244	31.6662	32.6262	32.5212	33.2512	32.6211	32.2817	32.7118	33.2756	32.4774	30.8658	32.4223	32.877	30.8766	27.6538	32.1726	27.9462	33.3065	32.4829	32.6366	32.6068	33.1548	32.9902	23.4427	27.9643	27.1999	30.6957
A0A087X0X3;M0R2I7;M0QYQ7;M0R0Y6;M0QY96	A0A087X0X3	#N/A	HNRNPM	HNRNPM	31.9702	31.6769	31.8564	31.9904	31.9435	31.962	31.7963	32.1132	31.61	31.897	32.0769	31.3794	31.8492	32.4187	32.3358	32.5255	32.5105	31.9665	32.1607	32.1401	32.4729	32.303	32.1477	32.0578	31.7253	32.2284	32.5173	32.1622	32.3969	32.2534	31.9686	32.3574	32.3288	32.611	32.1748	32.3477	31.8533	31.8439	31.8461	32.0847	32.0465	31.813	31.9002	31.6911	31.1725
A0A0G2JN29;A0A087X117;Q15155;A0A0G2JP90;A0A087WW46;H3BUC9;I3L0Q6;H3BTW1;H3BPS9	A0A0G2JN29;A0A087X117;Q15155;A0A0G2JP90;A0A087WW46	Nodal modulator 1	NOMO1	NOMO1	28.5185	28.4986	23.8908	28.4557	28.3113	27.9553	28.7456	28.2034	28.5937	28.2425	29.1321	28.072	27.5221	29.4177	27.7755	30.1715	27.6584	27.9803	27.7889	29.2657	28.5842	28.1632	27.2645	28.7333	28.7608	29.1635	28.3424	28.0679	27.9759	27.9761	27.9853	28.7127	29.1242	28.0334	28.2949	28.6611	27.8337	26.7818	28.1219	28.0878	28.4011	28.479	28.5968	27.5278	27.8848
A0A087X1G7;O60613;A0A0J9YX89;A0A3B3IT39;A0A087WXL0;A0A0B4J1T0;A8MZD0;O60613-2	A0A087X1G7;O60613;A0A0J9YX89	15 kDa selenoprotein	SELENOF	SELENOF	26.2399	24.1776	26.8367	22.6983	23.1543	27.4934	24.3376	25.6237	23.3547	26.7493	26.1267	25.2057	27.0405	27.3906	27.3467	25.7915	26.9529	24.6421	22.7187	25.6901	26.4697	24.4113	22.9261	27.7676	28.0226	23.0245	23.5083	24.5193	27.7854	24.236	25.642	26.7534	26.9344	26.2796	27.6497	26.2666	24.0142	25.9528	26.7514	23.8227	27.2198	26.7398	27.0821	24.644	26.1766
A0A087X1J7;P22352;H0YBE4;E5RG32;H0YC19	A0A087X1J7;P22352	Glutathione peroxidase;Glutathione peroxidase 3	GPX3	GPX3	31.4535	31.4226	32.272	31.2305	31.7564	32.3706	32.0637	30.895	31.7673	31.7621	32.6314	31.3428	32.576	31.2529	31.765	31.0167	31.8738	32.3413	31.881	31.4776	32.0694	31.7915	32.1719	31.5635	31.7783	33.2296	32.9574	33.1404	32.3527	31.8122	32.4864	32.4195	32.677	32.3592	32.6077	33.5138	32.4668	32.1855	33.0334	32.6443	32.8726	31.7665	30.3538	31.7066	31.5656
A0A087X1K9;E5RJ48;E5RI35	A0A087X1K9;E5RJ48	#N/A	LYPLA1	LYPLA1	27.8251	28.1249	27.0984	26.6773	26.5919	27.5638	27.9814	21.7998	26.1554	24.0678	26.1174	26.8651	26.5626	26.2531	26.6761	22.4735	26.2593	25.6976	25.7475	25.5388	28.0726	23.1587	22.0466	26.7106	26.1869	23.9705	23.5263	27.2188	27.7081	27.513	27.1397	27.4859	25.917	26.4678	22.9321	23.0518	25.1027	26.3544	24.5569	23.9225	22.5643	24.1779	23.6975	23.4409	26.7509
A0A087X1Z3;Q9UL46;H0YM70;H0YKU2	A0A087X1Z3;Q9UL46;H0YM70	Proteasome activator complex subunit 2	PSME2	PSME2	31.5099	31.0522	30.721	30.6774	30.8196	30.945	31.1268	31.2803	31.5642	30.8412	31.6298	31.1132	30.8946	31.4959	31.2944	31.0001	31.2108	30.8339	30.7537	30.9263	30.9059	31.2574	31.0153	30.6689	30.8501	31.4444	31.2446	31.2325	31.069	31.6	31.8121	31.1075	30.6197	31.1902	31.1946	31.7195	32.1955	31.02	30.941	31.481	31.3125	31.0415	30.8398	30.0645	30.1109
A0A087X232;P09871;F8WCZ6;H0Y5D1;F5H7T4;B5MCV4	A0A087X232;P09871;F8WCZ6	Complement C1s subcomponent;Complement C1s subcomponent heavy chain;Complement C1s subcomponent light chain	C1S	C1S	27.8471	26.0863	27.5216	28.4392	27.9213	26.0346	25.6976	23.3091	25.2389	22.1197	24.5901	24.1158	26.0831	25.2249	23.9278	26.3506	22.35	25.6863	26.2206	25.054	26.7788	26.6013	27.6441	24.8011	26.7852	29.2093	28.0977	27.2871	27.8257	25.53	27.0886	26.5921	31.3483	27.8709	29.4467	28.3206	26.5721	26.3945	30.1617	27.4089	27.7058	29.3396	26.1264	28.3087	27.9176
A0A087X256;Q2M389;Q2M389-2;F8W1W1;F8VYH7;F8VNZ5	A0A087X256;Q2M389;Q2M389-2	WASH complex subunit 7	WASHC4	WASHC4	27.7828	26.9801	26.1081	27.3316	27.628	27.2647	27.4245	27.6713	27.0617	27.4859	27.2999	27.9467	29.4046	27.69	27.28	27.8994	28.2921	27.9338	27.8161	28.0036	27.7781	27.3959	28.0218	27.1579	27.3931	28.143	26.5586	27.5343	27.6938	26.97	28.149	27.0282	27.3593	27.7518	26.8733	28.0054	27.179	27.5031	27.0005	27.1445	27.1268	25.5692	25.3589	23.5971	25.6326
A0A087X279;P09913	A0A087X279;P09913	Interferon-induced protein with tetratricopeptide repeats 2	IFIT2	IFIT2	30.1941	33.019	31.8629	31.87	32.428	31.4396	32.5105	31.5175	31.7499	30.242	30.6974	30.6825	30.1551	23.4914	29.8594	22.7631	30.3113	29.9983	30.7302	29.129	29.9432	29.5673	29.3875	29.5235	31.3556	29.9549	31.3954	32.3391	32.2212	31.8027	32.3806	30.4153	23.7189	31.1744	32.8466	31.452	23.4061	31.3178	30.3114	32.1562	31.7566	33.5884	31.7683	33.0478	33.1058
A0A087X296;P23219-4;P23219-3;P23219-2;P23219;P23219-6;P23219-5;A0A2R8YDM0;X6RJD6	A0A087X296;P23219-4;P23219-3;P23219-2;P23219;P23219-6;P23219-5;A0A2R8YDM0	Prostaglandin G/H synthase 1	PTGS1	PTGS1	22.5976	23.5167	24.8535	25.0539	23.9177	23.5158	23.9329	22.6214	24.2685	25.011	26.1626	24.0256	22.9749	22.6598	23.751	25.4043	26.4498	23.6024	23.2028	22.3783	26.7972	25.7309	23.963	23.9494	25.3485	25.5602	25.8166	23.491	27.3223	25.5631	24.5086	28.7961	23.4431	22.4438	26.4089	23.6546	24.6308	24.2399	25.276	23.9095	23.5789	23.2095	23.0864	24.1194	25.2403
H0YBA5;A0A087X2A7;Q8NB25-3;Q8NB25;H0YBC0;A0A0C4DGZ2;B9DI78;E7EQ67	H0YBA5;A0A087X2A7;Q8NB25-3;Q8NB25;H0YBC0;A0A0C4DGZ2	Protein FAM184A	FAM184A	FAM184A	23.6899	23.5077	24.8154	29.9723	23.7755	28.243	27.151	29.1149	24.4739	23.9474	23.0486	29.6876	23.9858	23.1714	29.7505	24.8919	24.0235	25.8776	23.9825	22.394	24.3569	23.2946	29.2544	23.8378	32.6637	30.4226	22.2853	29.0219	23.5736	29.5436	24.8772	25.7606	28.8987	26.524	29.5146	22.9786	24.7766	24.0613	26.0605	22.7661	22.9296	24.0011	25.9508	29.279	28.7717
A0A087X2D5;Q9BRJ2;A0A0G2JMS5;A0A087WU62	A0A087X2D5;Q9BRJ2;A0A0G2JMS5;A0A087WU62	39S ribosomal protein L45, mitochondrial	MRPL45	MRPL45	27.1325	27.6172	27.0447	26.9131	27.1717	27.8292	27.1778	27.9896	27.7183	28.3998	27.0032	27.7646	27.9547	27.109	27.6273	27.7544	28.1566	26.8554	27.6057	27.197	28.2125	27.8098	27.7907	27.0679	27.436	27.688	27.0264	27.5464	27.4315	28.0001	27.9284	27.8698	26.7898	27.7575	27.9193	28.3691	26.4705	28.1734	26.5454	27.4906	27.6568	27.6943	23.881	27.3371	25.834
A0A087X2H1;Q9ULT8;H0YJP0;G3V4V5;H0YJD4;A0A087WVU6;H0YJV8	A0A087X2H1;Q9ULT8;H0YJP0;G3V4V5	E3 ubiquitin-protein ligase HECTD1	HECTD1	HECTD1	26.7567	26.5819	25.8151	26.8713	26.6211	28.9736	25.8652	26.1654	25.7006	26.0468	27.021	26.8351	27.2763	26.8091	26.6711	27.2021	26.7222	22.7607	23.4105	26.4431	25.4351	26.3615	26.5644	27.5835	22.1396	26.706	26.72	26.3393	26.9175	26.6788	28.213	26.9828	27.4516	26.1503	26.8702	26.9536	24.3308	24.1203	26.5753	27.1896	22.4434	25.2879	28.2305	26.5419	27.7878
A0A087X2I1;P62333;H0YJC0;H0YJS8;H0YJX2;H0YJE9;H0YJT1	A0A087X2I1;P62333	26S protease regulatory subunit 10B	PSMC6	PSMC6	30.9171	31.0441	30.9163	30.7363	31.0095	31.1096	30.6409	30.7122	30.8228	30.8975	31.142	30.6201	30.8081	31.0316	30.9074	30.7891	31.0365	30.8481	30.8768	30.8433	31.0426	31.1136	30.4429	30.8445	30.7178	31.2762	30.7867	30.8445	30.9096	30.8277	30.8919	31.0287	31.2509	30.7722	30.9161	31.0452	31.0489	30.4694	30.3666	30.7743	30.7205	30.518	30.6576	30.5544	30.6161
A0A096LPE2;P35542;A0A3B3ISW8;E9PR14;G3V1D9;P0DJI9-2	A0A096LPE2;P35542	Serum amyloid A-4 protein	SAA2-SAA4	SAA2-SAA4	27.9964	27.5352	27.2154	27.956	27.2999	26.3375	26.424	27.6153	26.2962	24.113	23.7414	25.606	26.3216	27.1529	26.0511	27.5522	24.7375	26.0034	27.0046	27.2398	23.7919	24.2151	27.2986	27.1312	26.7653	28.1999	25.756	27.6969	27.1306	26.1608	27.3573	25.8069	27.6665	22.7111	27.5633	26.6506	27.3889	25.4803	26.4171	26.9201	23.634	27.8546	23.4675	28.0911	27.0528
A0A096LPJ4;A0A096LNZ9	A0A096LPJ4;A0A096LNZ9	#N/A	ISG15	ISG15	30.8203	26.8363	26.5739	27.2354	24.022	27.9574	27.4656	28.9653	26.9636	24.1027	22.4648	27.0117	23.6185	27.6707	23.8962	27.6698	27.0114	26.8694	26.9742	27.3169	27.2913	26.4416	26.132	24.4216	26.7056	26.7204	26.626	26.0632	27.1374	26.5925	27.9102	26.712	28.6494	27.0596	23.5065	27.8819	26.6202	25.2128	30.4759	26.3626	27.2192	27.3096	25.4495	26.1422	27.8614
A0A0A0MQS6;Q9H251-4;Q9H251-2;Q9H251;Q9H251-8;A0A087X097;Q9H251-3;Q9H251-9;Q9H251-7	A0A0A0MQS6;Q9H251-4;Q9H251-2;Q9H251;Q9H251-8;A0A087X097;Q9H251-3	Cadherin-23	CDH23	CDH23	27.0711	29.9242	24.4519	27.9366	23.6777	24.7021	22.3876	23.1512	26.6803	24.1916	26.2863	24.685	23.4171	24.9767	27.3137	24.7762	22.0387	24.6632	23.712	24.116	27.9988	23.1595	26.5297	24.1865	23.2814	24.7173	25.7132	21.3619	24.3858	27.6255	25.5671	26.7365	23.2767	24.4465	24.3012	27.2101	26.2043	22.4831	23.9939	26.7638	27.2772	30.4416	24.952	22.4718	23.9395
A0A0A0MTC7;A0A0A0MQS9;Q16363-2;Q16363;E5RFQ2;H0Y351;H0YAQ5;H0YAP9;E5RK79;E5RFD7;E5RHF3;Q6LET9;Q16363-3	A0A0A0MTC7;A0A0A0MQS9;Q16363-2;Q16363	Laminin subunit alpha-4	LAMA4	LAMA4	32.6471	32.4309	32.1757	32.4072	31.9715	32.17	32.2406	32.3123	32.4215	32.609	32.6175	32.4942	31.9257	31.7289	32.066	32.2748	32.786	32.365	32.3553	32.1056	32.4156	32.4966	32.0001	32.0828	32.4445	32.429	32.4666	32.4306	32.4567	32.3241	32.6178	32.7092	32.7245	32.6279	32.4977	32.5693	32.3696	32.1616	32.7953	32.4177	32.467	32.0197	31.732	32.335	32.098
A0A0A0MQU4;Q96I15;Q96I15-2;H7C3V9;H7C277;H7C1N7;H7C1S7;C9JNL5;H7C4A1;H7C280;F8WCL3;F8WBU3;H7C2M1	A0A0A0MQU4;Q96I15;Q96I15-2;H7C3V9;H7C277	Selenocysteine lyase	SCLY	SCLY	27.284	24.0834	24.9954	23.556	26.1354	24.5092	24.325	27.236	23.255	25.6793	27.9004	22.2656	23.7787	26.934	27.2274	26.3765	27.1582	26.848	26.775	26.6608	25.8939	27.2783	25.5321	24.8051	23.7912	26.4715	26.1023	26.3467	25.5527	26.5258	26.5985	24.0235	23.2317	24.216	28.3755	27.0625	23.4204	28.3235	26.4609	27.1936	26.4156	24.1846	22.3018	24.3177	24.1928
C9JP00;A0A0A0MQX8;Q9NR56;Q9NR56-7;Q86VM6;C9JCX1;H7C4Y1;Q9NUK0-2	C9JP00;A0A0A0MQX8;Q9NR56;Q9NR56-7;Q86VM6	Muscleblind-like protein 1	MBNL1	MBNL1	25.291	26.4373	23.754	23.1101	24.7556	22.4705	25.9833	23.2137	25.2779	23.531	23.5811	25.7374	25.2876	24.7813	23.6465	25.5825	25.0801	23.4059	24.9947	25.7566	23.2873	24.9705	24.2251	23.3727	24.4326	23.7801	25.1213	23.6379	26.2195	25.6616	24.503	25.5284	23.6402	26.7657	22.902	25.8094	23.2801	26.3774	23.8069	25.7096	26.189	23.81	25.0074	23.7141	23.489
A0A0A0MQZ4;Q8N3J5;V9GY69;V9GYZ5;Q8N3J5-2;V9GYS8;Q8N3J5-3;V9GYI6	A0A0A0MQZ4;Q8N3J5;V9GY69	Protein phosphatase 1K, mitochondrial	PPM1K	PPM1K	28.1945	28.2495	27.414	27.8281	28.093	26.9764	28.3356	29.0006	28.7319	29.5439	29.5054	28.6372	28.3038	27.4192	27.8225	28.4241	25.4302	28.5317	28.6137	28.6712	29.5755	28.3989	29.3131	27.7876	28.3292	29.6017	28.919	28.8379	29.1824	29.5573	29.0284	28.2248	28.5654	26.5706	28.2757	28.8151	29.7935	28.8243	27.0708	28.4305	29.2354	28.7698	28.7739	28.0487	27.7164
A0A0A0MR85;Q03013-2;Q03013;A6NNT0;A0A1W2PNX1	A0A0A0MR85;Q03013-2;Q03013	Glutathione S-transferase Mu 4	GSTM4	GSTM4	24.0128	27.3521	23.8596	24.5256	25.8046	26.6334	25.6942	29.2444	25.8079	28.9593	26.3515	26.1077	29.763	25.7468	22.4095	28.1088	28.2982	29.779	30.1385	25.0483	22.9859	29.4376	22.0894	26.0607	27.5203	27.0103	22.4702	26.3625	27.2662	29.1493	28.3751	27.7345	23.8464	28.6723	26.7991	24.0212	28.5156	28.5591	27.9051	27.8327	28.8436	27.7563	27.4739	25.1964	27.3116
A0A0A0MRA3;Q8WZ42-9;Q8WZ42-3;Q8WZ42-10;A0A0U1RRH3;C9JQJ2;REV__P61225	A0A0A0MRA3;Q8WZ42-9;Q8WZ42-3;Q8WZ42-10	Titin	TTN	TTN	29.5449	29.4526	29.5734	28.81	28.9727	30.2118	30.017	30.6692	29.051	28.0252	27.5694	28.5731	29.7818	28.4003	27.7818	29.0999	28.5791	28.8681	29.4155	28.5152	28.1978	28.861	28.637	28.2019	28.6683	27.4031	28.9679	28.6893	28.1402	30.3378	28.2939	28.6449	28.2185	27.746	29.9557	27.9793	29.1294	29.3926	28.645	24.456	29.0676	28.0526	29.1662	30.4554	27.8765
A0A0A0MRA5;B7Z4B8;Q9BUJ2-4;Q9BUJ2-2;Q9BUJ2;Q9BUJ2-3;M0R3F1;M0QYZ0;M0R203;M0QZV6;M0R0K8;M0QYI8;M0QYM5;Q9BUJ2-5	A0A0A0MRA5;B7Z4B8;Q9BUJ2-4;Q9BUJ2-2;Q9BUJ2;Q9BUJ2-3;M0R3F1;M0QYZ0	Heterogeneous nuclear ribonucleoprotein U-like protein 1	HNRNPUL1	HNRNPUL1	26.6693	25.3791	27.5557	26.7524	27.1184	26.1439	26.671	27.1099	26.5684	26.6536	26.6027	26.0912	26.682	27.7851	26.9616	26.9351	26.2155	26.0545	26.6649	25.6889	27.0908	26.8829	26.9006	27.187	27.3154	26.3323	27.6883	26.1558	27.2243	27.0904	26.7336	27.0471	27.8823	27.4429	27.5575	27.3554	26.3297	27.333	27.1295	27.3524	26.9199	26.548	27.4524	26.3713	26.2171
A0A0A0MRJ6;H7BY58;P22061;P22061-2;F6S8N6;A0A3F2YNX8;C9J0F2;F8WDT3;F8WAV5;F8WAX2;H7C4X2	A0A0A0MRJ6;H7BY58;P22061;P22061-2;F6S8N6;A0A3F2YNX8	Protein-L-isoaspartate O-methyltransferase;Protein-L-isoaspartate(D-aspartate) O-methyltransferase	PCMT1	PCMT1	32.848	32.9976	33.2169	33.246	33.0318	33.1564	33.0512	32.9945	32.8718	32.6997	32.7502	33.1281	32.8618	32.3195	32.7978	32.3882	32.8101	32.9922	32.864	32.7285	32.744	32.3817	32.789	32.3921	32.5787	32.6377	31.9905	32.3082	32.8427	33.0207	33.1824	33.0615	32.627	32.6877	32.828	32.9553	32.3974	32.5863	32.5278	31.012	32.5032	32.7077	32.9087	33.1203	32.9668
A0A0A0MRM2	A0A0A0MRM2	#N/A	NRAP	NRAP	24.2241	25.3341	25.5052	24.0881	24.4499	25.6588	23.8347	23.2901	25.0315	24.2723	24.1978	24.7935	25.6016	28.593	29.4749	25.5775	25.2217	25.3839	25.3425	26.6258	24.491	25.0893	24.0396	26.7045	24.6741	25.9008	25.7714	25.226	25.365	24.5578	25.6449	24.6798	24.5702	25.5827	23.7221	23.0087	23.9089	23.6261	24.1358	24.8727	25.0516	23.9014	23.8088	24.4974	25.3442
A0A0A0MRN9;Q5T457	A0A0A0MRN9;Q5T457	#N/A	ANKRD2	ANKRD2	27.9242	26.9486	27.6304	23.461	22.5241	27.4367	27.6566	26.395	26.3933	23.3084	28.0896	28.1167	27.5942	27.0401	27.7326	25.4119	22.9318	27.8541	25.8529	23.509	23.827	26.597	26.5242	27.7311	27.0278	22.0359	27.7174	26.8184	25.0836	23.0799	27.2799	26.9035	24.4397	22.3876	27.7569	23.128	26.6546	27.5868	24.3449	27.7319	28.5221	23.6612	26.287	24.4992	22.6873
A0A0A0MRR5;Q96BW1;Q96BW1-3;E9PSD7;F8W6E9;Q96BW1-2	A0A0A0MRR5;Q96BW1;Q96BW1-3;E9PSD7	Uracil phosphoribosyltransferase homolog	UPRT	UPRT	25.694	25.1286	28.2317	24.0239	26.5248	25.9895	28.1399	23.6538	23.9655	25.9261	23.0231	23.6538	22.2414	29.717	27.4544	23.3649	28.5489	30.0514	30.2853	22.8665	28.6995	23.9593	23.0508	25.7669	29.6538	27.039	24.812	24.9036	27.7347	26.9204	28.0017	24.278	25.4731	26.9133	24.8962	24.0403	27.0732	22.6617	24.6338	23.5521	21.8904	23.9901	22.4501	27.7593	26.9302
A0A0A0MRR7;P09234	A0A0A0MRR7;P09234	U1 small nuclear ribonucleoprotein C	SNRPC	SNRPC	27.2328	27.2231	27.562	27.318	27.2405	26.7326	26.93	27.1588	26.2889	26.8423	23.9848	27.0718	26.4995	27.7006	27.1403	27.3583	27.6223	27.2714	26.3788	26.5793	26.5669	26.87	26.9663	27.3942	26.7788	26.7264	24.2135	25.9048	26.267	26.9574	27.2466	27.0195	27.5704	26.5928	24.2017	26.7613	26.5028	26.9608	24.3694	25.6235	26.2856	26.8467	26.5431	26.6557	23.7404
A0A0A0MRT6;Q8IZP0-2;Q8IZP0-4;Q8IZP0-3;Q8IZP0-5;Q8IZP0-6;Q8IZP0-9;Q8IZP0;B6VEX4;Q8IZP0-10;Q8IZP0-8;Q8IZP0-7;Q8IZP0-12;Q8IZP0-11	A0A0A0MRT6;Q8IZP0-2;Q8IZP0-4;Q8IZP0-3;Q8IZP0-5;Q8IZP0-6;Q8IZP0-9;Q8IZP0;B6VEX4;Q8IZP0-10;Q8IZP0-8;Q8IZP0-7;Q8IZP0-12;Q8IZP0-11	Abl interactor 1	ABI1	ABI1	28.5805	28.3071	23.848	28.9734	22.9225	22.5473	27.8821	29.2746	27.7408	26.6109	26.9583	27.5985	27.3017	27.3791	28.1107	28.3218	27.4145	27.0698	26.6171	26.3699	27.8586	27.0222	27.2723	26.9351	27.8674	27.614	22.0291	24.1136	27.325	27.3413	27.1667	27.8436	28.7344	28.1078	27.9032	28.7775	23.467	22.671	24.4946	26.9739	28.639	23.3865	27.0568	22.2023	27.4731
B4DZ84;D3DX48;A0A0A0MRU0;A0A0D9SFF8;D3DX49;A0A0C4DH75;Q14168-6;Q14168-2;Q14168-3;Q14168;Q14168-4;Q14168-5;E5RI47;A0A087WVY2;A0A087X0C7;E5RK50;E5RJK0;E5RK44;E5RI32;E5RIU3	B4DZ84;D3DX48;A0A0A0MRU0;A0A0D9SFF8;D3DX49;A0A0C4DH75;Q14168-6;Q14168-2;Q14168-3;Q14168;Q14168-4;Q14168-5	MAGUK p55 subfamily member 2	MPP2	MPP2	23.9162	24.5976	22.162	22.3475	20.8756	21.5781	24.7041	23.4748	23.615	23.5867	24.8386	24.641	24.1506	21.4045	22.4577	24.9819	23.2775	24.6984	22.4965	23.3886	23.045	24.8428	24.5018	23.5816	22.0487	22.9314	23.6112	21.7484	22.6175	23.6862	25.4159	22.9505	23.7735	25.3996	22.524	22.2823	24.73	22.4463	22.6753	24.6494	22.2447	23.5439	25.4351	23.1745	24.2462
A0A0A0MRZ8;P04433	A0A0A0MRZ8;P04433	Ig kappa chain V-III region VG	IGKV3D-11	IGKV3D-11	29.4808	27.1394	29.3738	28.7804	28.6082	27.0915	27.2699	29.2336	27.5508	23.7075	26.5134	28.2745	28.9884	28.764	27.3075	28.222	27.4891	27.5688	28.1399	24.3669	25.7823	27.8392	28.9101	27.1212	27.8156	30.5032	27.4912	30.7004	27.7684	27.0068	28.257	27.0903	29.3993	28.6324	27.962	29.5655	26.9165	23.1128	29.5525	28.5654	28.1021	28.2659	26.0895	28.8419	29.0307
A0A0A0MS15	A0A0A0MS15	#N/A	IGHV3-49	IGHV3-49	24.8792	22.6648	23.4666	27.3667	27.3037	27.4068	26.4067	28.1369	26.8858	26.1092	24.7852	27.9051	26.2236	28.1048	27.3147	24.2503	27.287	26.6278	26.2949	26.8304	27.6533	27.3551	27.8778	26.3172	29.0279	28.2701	28.5924	29.4932	27.7683	22.4354	28.3291	23.9011	28.4308	27.6304	23.5116	29.0905	26.2125	25.7982	30.455	28.5817	28.2791	24.0726	24.4746	24.2814	26.9731
A0A0A0MS41;Q9BWM7;A0A1P0AYU5;S4R3N9	A0A0A0MS41;Q9BWM7;A0A1P0AYU5;S4R3N9	Sideroflexin;Sideroflexin-3	SFXN3	SFXN3	29.5022	28.7581	28.4722	29.5957	29.0112	30.0603	29.5796	28.9014	29.148	29.3956	28.6545	28.1396	28.5109	29.0727	27.9864	29.0268	27.9239	29.0476	28.3042	28.8538	28.4861	28.1346	28.9599	28.5545	27.8706	29.3623	28.4449	28.2753	29.5265	28.9319	28.7728	29.0824	30.6316	27.6883	29.816	28.5153	29.1979	28.4519	27.8728	26.7327	28.1162	28.7683	28.5966	27.1477	28.9331
A0A0A0MS51;A0A0A0MT01;P06396-4;Q5T0H8;REV__H0YJM7	A0A0A0MS51;A0A0A0MT01;P06396-4	Gelsolin	GSN	GSN	28.7477	28.1728	29.9229	26.4171	27.5802	28.1101	28.882	28.4028	27.8887	29.7415	29.0447	28.9883	29.2336	28.7743	29.5935	28.8549	30.1252	29.635	29.5669	29.2051	29.3079	29.8106	28.591	29.2031	29.5228	29.3349	29.7802	26.5871	28.9583	27.1298	29.4487	29.3127	29.2557	28.7883	29.4808	29.2434	23.3526	28.8163	28.4589	28.9599	28.5247	27.74	28.8772	23.9171	28.7693
A0A0A0MSA4	A0A0A0MSA4	#N/A	EPB41L3	EPB41L3	25.131	22.5689	24.1425	24.3308	25.1225	25.59	23.7855	24.6236	25.3324	22.7425	24.6035	24.9987	24.0183	25.6704	23.6615	25.6897	26.3881	24.4329	25.2249	25.0152	25.9024	26.0662	23.0072	26.0957	23.3085	22.6834	25.6519	25.5961	25.678	24.25	24.5536	26.0821	27.6619	26.4601	26.4777	25.7212	24.2775	24.2342	25.9092	25.7558	22.2036	25.4435	25.5536	24.1658	24.5476
A0A0A0MSB8;Q9UPT5-6;Q9UPT5;Q9UPT5-5;Q9UPT5-1;Q9UPT5-2;A0A0A0MRE1;Q9UPT5-4;B5MCY9;K7ERQ5;C9JME6;C9JKC2	A0A0A0MSB8;Q9UPT5-6;Q9UPT5;Q9UPT5-5;Q9UPT5-1;Q9UPT5-2;A0A0A0MRE1	Exocyst complex component 7	EXOC7	EXOC7	26.8212	26.6756	27.2212	25.4737	27.7605	26.5166	25.9207	26.5331	26.6561	26.1594	27.1291	27.5307	26.9853	26.18	26.0631	26.0611	27.543	26.361	26.8049	27.068	26.2431	26.8027	27.1726	26.317	27.7506	27.4058	27.3348	26.5421	27.2299	26.1401	26.1458	26.5313	28.8886	26.4655	27.3597	27.7396	29.5888	27.1041	26.4365	26.8655	25.5833	24.4941	27.8231	23.9906	26.5427
J3KNW4;A0A0A0MSG2;Q14192;F8WDA8;U3KQT4;Q14192-2;C9J3S8	J3KNW4;A0A0A0MSG2;Q14192	Four and a half LIM domains protein 2	FHL2	FHL2	33.7259	32.1589	33.4462	32.965	32.418	31.7873	33.1197	33.4418	33.4318	33.3302	33.3035	33.7303	33.71	32.023	33.5577	32.991	33.8761	33.711	33.0301	33.5549	33.3748	34.2437	32.8238	33.3219	33.6213	32.0754	33.863	33.0811	32.8389	32.9215	32.9916	32.7255	33.0523	33.4656	32.594	32.8772	33.9947	33.9412	29.6721	33.1867	33.503	33.9392	34.1763	34.7435	34.4193
A0A0A0MSS8;P42330;S4R3Z2;S4R3D5;P17516	A0A0A0MSS8;P42330;S4R3Z2;S4R3D5	Aldo-keto reductase family 1 member C3	AKR1C3	AKR1C3	30.7432	29.4007	29.6321	28.8598	28.0284	29.4814	28.8104	28.3313	28.6342	28.6992	28.3419	28.8396	29.1043	29.5811	28.1738	28.3557	28.5123	28.4777	29.1536	28.8006	29.2864	28.8224	29.5781	28.8547	29.6412	29.9666	29.2431	29.6643	29.9725	28.2559	28.7702	28.4442	30.5454	29.0216	30.1873	28.7449	28.6536	29.0822	30.0197	29.2488	28.7049	29.3857	27.9352	30.3004	28.6573
A0A0G2JKZ1;A0A0A0MSV9;O15533-2;O15533;O15533-3;A2AB90;A0A0G2JH37;Q6P1N7;C9JA35;A0A0A0MT98;O15533-4;A0A140T9B2;A0A0G2JJI5	A0A0G2JKZ1;A0A0A0MSV9;O15533-2;O15533;O15533-3;A2AB90;A0A0G2JH37;Q6P1N7	Tapasin	TAPBP	TAPBP	26.1965	26.2669	24.2525	26.2998	26.7222	22.9782	26.1224	26.1544	25.4657	26.5421	26.0189	24.7941	23.1194	25.9724	27.042	25.4305	26.5607	26.9418	26.5454	26.0838	24.9401	25.7258	25.5104	22.0771	25.421	25.8973	23.4075	26.6577	26.3771	25.3573	24.3516	26.5519	27.7127	26.7842	26.0129	25.4349	24.7547	23.4652	23.5348	25.4933	23.2511	26.4627	26.0876	24.7659	23.0431
A0A0A0MT83;P26440;P26440-2;H7C4G6;H0YLC3;H0YKV0;H0YN10;A0A087WVD3	A0A0A0MT83;P26440;P26440-2;H7C4G6	Isovaleryl-CoA dehydrogenase, mitochondrial	IVD	IVD	31.7634	32.1092	32.5612	32.2835	32.5378	32.3303	32.2777	31.551	32.202	32.6482	32.0637	32.6314	32.3199	31.3039	31.5331	31.8079	31.8165	32.1332	31.9156	32.1499	32.7158	32.0193	32.1508	31.9	31.9628	32.105	31.7286	31.9193	32.1027	32.3862	32.293	33.0113	32.47	31.3492	32.2259	31.9968	31.6936	32.0389	31.5797	31.5106	31.324	31.6703	31.6178	32.1262	32.0129
A0A0A0MTH3;Q13418;Q13418-2;Q13418-3;E9PQ52;A0A087WW45	A0A0A0MTH3;Q13418;Q13418-2;Q13418-3	Integrin-linked protein kinase	ILK	ILK	32.0496	32.0534	31.973	32.0052	31.7536	32.0126	31.6955	31.8416	32.2387	32.1061	32.133	31.8658	32.0157	31.5411	31.8559	31.9532	32.1321	31.7148	32.1248	31.942	31.9835	31.8947	32.1051	31.9617	32.098	31.5079	31.9816	31.8765	32.0224	31.7888	32.0165	31.91	32.4318	32.1506	32.3225	31.8986	31.9573	31.7142	32.2347	32.1111	32.0505	31.5962	31.8647	31.818	31.5395
A0A0A0MTN0;Q13617;Q13617-2;Q5T2B5;Q5T2B7	A0A0A0MTN0;Q13617;Q13617-2;Q5T2B5	Cullin-2	CUL2	CUL2	28.2316	28.3711	27.5788	28.4443	27.9682	28.0364	27.8441	28.1524	27.9179	28.3563	28.5434	28.213	27.3273	28.2861	28.1902	28.4356	28.5027	28.3041	27.9379	27.9859	28.8069	28.0978	28.5356	28.196	28.9064	29.4289	26.1612	29.0628	28.5072	28.221	28.2124	28.5081	28.2478	28.4302	27.9772	29.058	27.8966	28.596	28.7579	28.4422	28.7404	26.3101	28.1225	27.3701	27.438
A0A0A0MTS7;Q8WZ42-12;H7C195	A0A0A0MTS7;Q8WZ42-12	Titin	TTN	TTN.1	40.7625	41.0631	40.9977	40.3348	40.9045	40.6762	40.9672	40.9226	40.968	40.9337	40.6729	40.9683	40.9201	40.397	40.8738	40.5981	40.7904	40.9571	40.8513	40.6491	40.5605	40.6642	40.7496	40.795	40.7847	40.5397	39.4877	40.6806	40.9128	41.0528	40.9017	40.9222	40.3227	40.7435	40.8893	40.6107	40.2561	40.8602	40.2245	40.5471	40.5849	40.4956	41.0008	40.8182	40.7722
A0A0A6YYH1;Q7Z6K5-2;Q7Z6K5;H0YMP5;H0YL03;H0YMK0;H0YL85	A0A0A6YYH1;Q7Z6K5-2;Q7Z6K5	Arpin	C15orf38-AP3S2	C15orf38-AP3S2	24.8575	25.6315	22.9713	25.8463	23.7934	24.324	24.5698	24.5744	23.8843	23.1495	23.2644	24.1366	21.5271	24.9331	23.5695	24.5009	23.1738	22.9394	24.8027	24.0655	24.8669	24.3348	24.4912	24.2161	25.258	23.6328	23.9835	23.3045	23.7766	24.0804	23.9519	25.3233	24.8441	24.3605	25.0858	25.2403	22.9671	24.8029	25.3612	23.1641	25.0503	25.0812	23.4287	23.7703	23.7062
A0A0A6YYJ8;Q96HJ9-2;Q9Y383-3;A8MYV2;Q9NQ29-3;B8ZZ10;B8ZZ12;B8ZZ09	A0A0A6YYJ8;Q96HJ9-2;Q9Y383-3	UPF0562 protein C7orf55;Putative RNA-binding protein Luc7-like 2	LUC7L2	LUC7L2	28.6783	28.1202	28.3693	27.2648	27.8998	27.8491	28.2397	28.752	28.3657	28.1134	28.5153	27.9645	28.6677	28.1034	28.5873	27.6843	28.1836	28.4497	28.81	28.4583	29.1568	28.5524	27.5837	28.2128	27.6769	27.4455	28.6961	28.382	27.845	27.9968	28.7538	29.0265	29.0776	27.1842	28.6677	28.1013	28.3981	29.5718	28.8551	27.8503	26.1959	28.7077	27.9706	28.424	27.9717
A0A0A6YYL2;P0DMN0;P0DMM9;P0DMM9-3;P0DMM9-2;H3BPL6;H3BNY7;H3BRT0	A0A0A6YYL2;P0DMN0;P0DMM9;P0DMM9-3;P0DMM9-2	Sulfotransferase;Sulfotransferase 1A4;Sulfotransferase 1A3	SULT1A4	SULT1A4	28.1682	26.6558	28.8617	26.7908	27.4823	28.251	28.1582	28.8502	28.5576	29.076	28.4748	27.5643	27.2816	27.9951	28.5913	28.76	28.9715	29.1147	28.3544	28.294	29.2719	28.7584	29.3959	28.7081	28.7409	28.5534	27.6249	27.8289	28.5866	29.2815	28.8527	28.7273	25.8561	28.2109	28.5529	28.8117	28.3442	28.9467	27.6817	27.623	27.1252	27.7472	23.2655	27.7173	28.9294
A0A0A6YYL4;P57737-3;P57737-4;P57737;P57737-2;I3L167;I3L3T0;Q9Y3D7;I3L1U7;E7EP81;I3L442;I3L359;I3L426;I3L2Y6;I3L1M1;I3NI06;I3L212;I3L1G9;A0A0B4J298;I3L351;I3L0X8	A0A0A6YYL4;P57737-3;P57737-4;P57737;P57737-2	Coronin;Coronin-7	CORO7-PAM16	CORO7-PAM16	28.8043	28.357	27.1491	27.7797	27.8821	27.9	28.1799	27.9866	28.5656	27.9512	27.957	27.9813	27.9691	28.3556	27.8713	28.7448	27.9923	27.5985	28.2671	27.6464	28.4045	28.3836	27.3013	28.4142	27.6827	28.1849	27.4846	27.8554	28.5319	28.447	28.0475	28.5538	27.0968	27.9329	27.9819	28.5543	27.6898	28	24.3465	27.9289	27.3704	28.5195	28.0254	27.6768	27.7581
A0A0B4J1R2;Q9H6R3;Q9H6R3-2;F8VZB4;H0YII9	A0A0B4J1R2;Q9H6R3;Q9H6R3-2	Acyl-CoA synthetase short-chain family member 3, mitochondrial	ACSS3	ACSS3	28.5618	28.3417	29.2932	27.5824	28.9614	28.8681	28.3991	30.1886	30.0193	30.5392	29.9425	29.605	29.9626	30.2177	30.4277	30.2946	30.2938	30.2008	30.6829	29.8723	30.3933	30.6073	29.8568	29.3447	28.065	29.8326	29.8777	29.5764	29.8464	29.9653	30.1293	30.3058	28.931	29.826	28.8988	29.9113	27.8696	29.6538	28.4192	29.8232	29.8615	29.0468	29.029	28.8431	28.1833
A0A0B4J1X5;A0A0C4DH42;A0A075B7E8;P01767;A0A0J9YVY3	A0A0B4J1X5;A0A0C4DH42;A0A075B7E8;P01767	Ig heavy chain V-III region BUT	IGHV3-74	IGHV3-74	25.8427	23.7768	27.6188	26.4538	26.1434	26.1371	25.9962	27.6269	24.6028	24.2066	26.3398	27.5948	29.6055	25.944	27.1188	27.6012	25.5587	25.4665	26.0112	28.5754	28.1367	28.4985	27.8715	29.0862	28.0385	30.0208	26.9638	28.6814	26.6273	25.0357	27.9003	24.5119	29.6408	29.3794	26.507	28.6174	25.3811	26.8933	30.304	28.0976	29.3623	27.7389	25.5727	27.0333	26.9295
A0A0B4J1Y9	A0A0B4J1Y9	#N/A	IGHV3-72	IGHV3-72	24.202	23.4058	27.3752	23.8413	27.6033	24.1634	26.8474	27.8063	23.6664	22.4545	24.6243	23.4904	24.2459	26.9146	23.7211	25.1941	23.2995	24.9855	25.54	25.7094	23.7608	25.5163	28.6115	23.2548	27.6288	28.4715	28.8908	30.6954	26.5876	23.704	25.0772	24.7823	28.7419	28.8862	26.9931	22.8205	26.579	24.1683	30.294	27.888	23.3538	29.5851	25.1224	28.9787	26.458
A0A0B4J1Z1;C9JAB2;Q16629-3;Q16629-2;Q16629-4;Q16629;F8WEA1	A0A0B4J1Z1;C9JAB2;Q16629-3;Q16629-2;Q16629-4;Q16629	Serine/arginine-rich splicing factor 7	SRSF7	SRSF7	26.6557	27.322	27.8307	28.0884	28.0113	27.3089	28.3307	27.378	27.5926	27.5971	26.9783	27.1223	26.4891	27.8737	27.5826	27.9093	27.0531	27.1397	27.501	27.1483	27.3329	27.4352	26.2944	27.8008	27.7284	27.5414	27.4062	28.0089	28.7688	27.5922	28.4028	27.6237	27.6346	28.1132	27.6032	28.0822	27.186	27.9815	28.171	27.5007	28.2852	27.2932	23.4206	27.2525	25.3637
A0A0B4J231;B9A064;P0CG04	A0A0B4J231;B9A064;P0CG04	Immunoglobulin lambda-like polypeptide 5;Ig lambda-1 chain C regions	IGLL5	IGLL5	32.5173	31.6948	31.5269	32.4897	32.7318	31.5245	31.2551	32.0142	30.3463	29.1321	26.6047	31.3531	31.4637	32.0265	31.8741	30.4358	31.4012	31.0894	30.5359	31.5835	30.9857	30.5886	32.3703	31.5672	32.2581	33.6564	32.6454	33.4144	32.6497	30.1328	31.8804	28.4469	34.492	33.0311	31.9051	33.7669	32.2988	31.045	34.5629	32.6425	33.495	33.6044	31.1765	33.0399	33.0164
A0A0B4J269;Q13509;Q13509-2;G3V2A3;G3V5W4;G3V2R8;G3V3R4;G3V2N6;G3V4F0;Q01726	A0A0B4J269;Q13509;Q13509-2	Tubulin beta-3 chain	TUBB3	TUBB3	22.9986	27.0399	26.2771	26.5747	26.7894	26.5928	26.9744	25.3246	26.0302	26.3679	26.6087	26.8953	26.4592	28.0988	27.4686	27.6002	28.5392	26.9369	25.9993	27.2595	26.0078	28.1169	26.7744	27.4646	25.5133	27.6924	27.0258	27.0694	26.7516	26.8667	27.4469	27.5858	23.88	27.1341	26.5884	27.5407	25.5773	26.2579	27.6202	26.4007	26.433	27.5893	27.7285	22.5988	24.7057
Q5W0H4;A0A0B4J2C3;P13693;J3KPG2;E9PJF7;P13693-2;H0YCX0;Q56UQ5;Q9HAU6	Q5W0H4;A0A0B4J2C3;P13693;J3KPG2;E9PJF7;P13693-2	Translationally-controlled tumor protein	TPT1	TPT1	30.5894	30.6578	30.9226	30.763	30.6557	30.6239	29.4897	31.3564	30.453	30.6654	30.2177	30.5884	30.9758	31.7411	31.4733	31.1139	30.625	29.6775	30.4107	31.372	30.7414	30.5676	31.1854	30.7028	30.69	30.9392	30.875	30.7818	29.8969	30.8769	31.2609	31.6419	30.078	30.5446	29.2474	30.0737	30.0479	30.9925	30.5852	29.8623	30.4075	30.3026	30.8602	30.6243	30.6468
A0A0B4J2F0	A0A0B4J2F0	#N/A	PIGBOS1	PIGBOS1	23.3457	25.4066	24.7408	23.9161	22.7174	25.5905	22.8208	24.6901	24.5793	25.3727	24.2695	23.9291	24.5246	23.4126	25.2249	25.4171	23.4214	23.6906	25.1358	25.3194	26.5097	24.7322	24.6233	24.9512	25.4709	23.8507	25.0505	25.1081	23.0583	25.6062	24.7283	25.5626	25.8473	25.6318	25.1726	24.9481	23.7493	24.4848	24.6441	25.2776	23.7935	25.9043	24.0633	25.7422	25.0286
A0A0C4DFM0;G3V5T0;G3V4T6;A0A0A0MR33;G3V267;O43708-2;G3V3B9;G3V5U6;G3V5G8;H0YJN8	A0A0C4DFM0;G3V5T0;G3V4T6;A0A0A0MR33;G3V267;O43708-2	Maleylacetoacetate isomerase	GSTZ1	GSTZ1	29.8863	28.8259	29.6409	28.4621	29.3107	29.0451	30.5678	29.0902	29.6715	28.6815	29.9355	29.308	29.1555	28.6339	28.9047	28.9403	28.7953	26.9031	28.3936	28.798	29.6061	28.3054	29.8572	29.1317	29.8639	29.589	29.1078	29.3984	29.7063	29.7073	29.8603	30.3822	29.2907	29.1402	29.5134	29.3943	27.3789	29.0393	28.923	29.0159	29.615	29.6953	30.2262	28.4319	29.149
A0A0C4DFM1;Q92544;F8WCN2;F2Z2L1	A0A0C4DFM1;Q92544	Transmembrane 9 superfamily member 4	TM9SF4	TM9SF4	23.2745	25.0871	24.971	23.0138	24.7935	24.8032	24.3654	24.8806	24.0162	23.0457	24.9485	22.7731	22.585	23.7308	24.7104	26.027	25.9585	25.1609	23.5428	25.3711	25.6297	24.9171	23.3355	25.5581	24.3506	26.8602	23.9885	25.1347	24.8178	24.7841	24.871	26.497	24.3826	24.3659	24.1452	26.1175	22.9032	23.7853	23.7425	23.8578	26.2247	22.9492	24.3081	24.7078	22.7492
A0A0C4DFN3;Q99685;Q99685-2;A0A3B3ITT3;E7EWX8;H7C599;H7C5K5;C9J8Q3;C9JAM4	A0A0C4DFN3;Q99685;Q99685-2;A0A3B3ITT3;E7EWX8;H7C599	Monoglyceride lipase	MGLL	MGLL	28.7244	28.6615	28.4742	28.4405	28.3758	27.8694	29.1275	28.5141	30.3017	30.2083	29.7106	30.0119	30.0941	29.7265	30.0823	29.5926	30.3409	29.5497	30.3752	29.3516	30.4794	30.1393	29.9542	29.8267	30.0499	30.3043	30.1344	29.4118	29.089	30.3145	29.4375	29.2204	28.2599	29.5596	28.9765	29.7984	29.9877	30.2492	29.8434	29.3713	29.6541	25.6511	24.8853	27.1004	28.372
A0A0C4DFT3;Q12959-4;Q12959-2;Q12959-5;Q12959-3;Q12959-6;Q12959;Q12959-7;Q12959-8;Q12959-9;E7EQD7;B4E2H8;H7C166;C9IYP1;C9JCP6;A8MUT6;C9JUA9;C9J110;F2Z2L0;A8MUT9	A0A0C4DFT3;Q12959-4;Q12959-2;Q12959-5;Q12959-3;Q12959-6;Q12959;Q12959-7;Q12959-8;Q12959-9;E7EQD7	Disks large homolog 1	DLG1	DLG1	24.1055	22.4332	25.9307	24.282	25.002	26.3897	22.8461	25.6564	25.7913	24.6765	24.6171	25.5625	25.5005	26.4845	26.7186	25.9399	25.1371	24.4635	26.2712	23.6931	25.2455	24.0045	22.3861	26.6773	24.6445	23.402	26.1037	25.5302	26.1602	24.74	24.5652	25.3337	26.834	25.4947	25.418	25.0525	24.0399	23.8912	25.3191	25.1751	25.6999	23.5711	24.4446	26.2783	25.1491
A0A0C4DFZ2;P15289-2;P15289	A0A0C4DFZ2;P15289-2;P15289	Arylsulfatase A;Arylsulfatase A component B;Arylsulfatase A component C	ARSA	ARSA	26.0628	24.3365	26.0742	25.7703	24.0954	26.7846	26.5231	25.4371	22.9885	25.6426	23.3989	25.611	25.5178	25.6003	24.6061	24.6383	24.2786	22.4306	24.2467	25.1391	25.6286	23.1834	24.8945	24.831	25.3233	23.2355	25.0864	24.6861	25.2733	27.1104	23.393	26.9989	26.1275	25.1388	25.8029	25.1411	23.8169	23.6694	24.2798	22.9278	23.0781	24.4303	24.7153	26.7294	26.1181
A0A0C4DG49;A0A0A0MSA9;P15151-3;P15151-2;P15151;P15151-4;K7EMC6	A0A0C4DG49;A0A0A0MSA9;P15151-3;P15151-2;P15151;P15151-4	Poliovirus receptor	PVR	PVR	23.4375	26.0245	24.3487	23.6639	24.3023	24.756	24.5003	24.7008	25.0538	25.4514	26.292	25.5498	26.1643	28.1746	26.9157	27.6942	24.4668	23.7449	23.6776	25.0952	23.9361	25.1669	23.4823	27.8255	25.6625	27.2041	25.3381	24.9458	23.3048	24.1288	25.3119	23.7023	24.3631	24.6774	23.7731	22.5441	24.9371	22.3848	25.6399	25.8476	23.104	24.3983	22.7468	23.9554	23.5897
A0A0C4DGA7;A0A0A0MRD5;O94929-4;D6RHE7	A0A0C4DGA7	#N/A	ABLIM3	ABLIM3	29.2667	29.3077	29.7102	28.8501	27.7389	29.2223	28.672	28.776	29.1028	29.0121	29.6959	28.5595	29.0722	29.0687	28.7457	28.6269	28.5854	28.3985	27.8761	27.3929	27.7524	27.3862	29.0133	28.464	28.4694	28.7093	28.5476	28.9425	29.565	27.9953	28.2691	28.7164	29.6545	29.1659	30.3494	29.7592	29.9335	28.6687	28.0697	28.0433	29.0513	30.3361	29.5187	29.4974	29.6654
A0A0C4DGB0;Q9UIL1-2;Q9UIL1;Q9UIL1-3	A0A0C4DGB0;Q9UIL1-2;Q9UIL1;Q9UIL1-3	Short coiled-coil protein	SCOC	SCOC	25.7139	24.8266	25.4115	25.3927	24.4805	23.6452	26.0741	23.4024	24.2474	26.3507	26.5188	22.6814	25.5483	27.7387	26.4498	23.0677	26.2473	25.6532	24.9595	22.8746	26.0185	22.007	24.9507	27.4612	22.7486	23.0991	22.9571	23.0386	25.3565	26.3605	25.6894	24.9107	25.3683	23.7969	25.0565	21.9508	24.1773	23.79	23.615	23.8276	23.5202	26.0525	25.9091	23.1485	25.8875
A0A0C4DGB9	A0A0C4DGB9	#N/A	PPA2	PPA2	25.5988	24.8813	23.0825	25.2786	25.043	24.9075	24.6628	24.2723	24.5582	24.7614	25.0778	24.7893	22.5651	24.2039	23.0228	25.4423	24.6136	25.094	23.0353	24.938	25.2889	23.9465	23.6726	24.6037	24.2542	24.0611	24.2216	24.7667	23.4205	24.3494	24.1586	24.4365	23.0933	24.6463	24.6637	23.223	24.5806	24.3034	23.6254	23.5111	24.8642	24.3477	25.2299	25.6144	25.0573
A0A0C4DGJ8;Q6IPR1;G3V521	A0A0C4DGJ8;Q6IPR1	LYR motif-containing protein 5	ETFRF1	ETFRF1	26.8521	26.931	25.8301	26.0477	27.1036	26.4881	27.2909	27.6391	27.5954	27.8542	26.5588	27.8833	26.5353	26.3929	27.2167	27.5143	27.5742	26.7579	25.8714	27.4711	28.0009	27.9223	28.3792	26.4604	27.1584	27.923	26.6421	24.6276	25.9146	27.471	28.0093	27.9067	25.7828	26.4408	27.7179	27.1303	27.3389	26.4031	26.0289	27.3377	27.2593	25.8996	26.6633	27.9634	25.1692
A0A0C4DGQ5;P04632;K7ELJ7;K7EM73;A0A075B7C0;K7EKD8;U3KQE2;K7EIV0;U3KPR7;K7ES78;K7EMQ1	A0A0C4DGQ5;P04632;K7ELJ7;K7EM73;A0A075B7C0;K7EKD8;U3KQE2;K7EIV0	Calpain small subunit 1	CAPNS1	CAPNS1	31.496	31.2751	31.6115	32.0096	31.7752	31.8547	31.6495	31.4802	31.1701	31.5278	31.5644	31.3156	31.4126	32.0569	31.8747	31.1823	31.7671	31.5384	31.6177	31.4777	31.7317	31.7862	31.8604	31.6446	31.6662	31.8876	31.6644	31.8966	31.4993	31.9313	31.8012	31.8031	31.7351	31.928	31.762	32.02	32.1384	31.5781	31.5203	30.1825	31.8346	31.3189	31.6008	31.6192	31.2147
A0A0C4DGQ8;Q6IAN0;J3KRS1;J3QKT1;J3QLJ8;J3QLK1	A0A0C4DGQ8;Q6IAN0	Dehydrogenase/reductase SDR family member 7B	DHRS7B	DHRS7B	28.3025	27.2625	27.7358	28.1315	28.1812	28.3322	28.1358	28.6385	28.1857	29.5035	27.9194	27.844	29.1452	28.2365	28.6719	28.4244	28.0888	28.0404	28.6183	29.1595	28.4006	28.4469	28.56	28.7101	28.3586	28.317	28.4951	28.2036	28.1077	28.3483	28.3616	28.4986	28.1586	28.2005	28.7089	28.0473	27.2469	28.033	28.3672	28.5066	28.2366	27.179	27.802	27.645	28.1046
A0A0C4DGS0;A0A2Y9D025;P56556;R4GN43	A0A0C4DGS0;A0A2Y9D025;P56556;R4GN43	NADH dehydrogenase [ubiquinone] 1 alpha subcomplex subunit 6	NDUFA6	NDUFA6	33.1742	33.2348	33.3685	32.7891	32.0106	32.5302	32.807	33.2555	32.5991	33.2579	33.0209	32.3694	33.051	32.6098	32.667	33.0153	33.2622	33.0623	33.1847	32.5161	32.5355	32.9262	32.9461	32.5197	32.3565	31.983	32.8336	32.948	32.9263	32.9078	33.2009	32.8513	31.9721	33.2527	31.7672	33.0269	32.2537	33.4144	31.9958	33.0988	32.8591	32.6802	32.6687	32.8572	32.518
A0A0C4DGS1;P39656;P39656-3;P39656-2;U3KQ84	A0A0C4DGS1;P39656;P39656-3;P39656-2	Dolichyl-diphosphooligosaccharide--protein glycosyltransferase 48 kDa subunit	DDOST	DDOST	30.7411	30.5727	30.4713	30.2065	30.6959	30.5678	30.6278	30.6006	30.62	30.9537	30.8797	30.5319	30.6276	31.0366	30.8907	31.5149	30.1629	30.5115	30.4017	30.7033	31.1747	30.3831	30.6621	31.0525	30.7832	31.1288	30.414	30.641	30.6796	30.7665	30.5417	30.7223	29.8287	30.5898	30.5635	30.8412	30.1285	30.6281	30.1979	30.2686	30.6431	30.655	30.7449	30.1448	29.9799
A0A0C4DGS9;Q9Y6K0	A0A0C4DGS9;Q9Y6K0	Choline/ethanolaminephosphotransferase 1	CEPT1	CEPT1	24.8814	25.2352	22.958	25.0969	22.9751	23.3865	24.0445	25.2157	22.8126	23.031	25.0336	23.918	23.6904	24.2375	24.3538	25.3929	23.3009	22.9947	24.63	22.8789	24.5841	24.4253	24.3791	23.7618	25.1057	24.6623	24.2993	22.8356	24.3549	23.666	22.924	24.1839	25.3865	22.6816	25.7261	22.737	24.5321	23.9774	24.6291	24.3635	24.6257	24.6959	24.0575	24.1664	23.5988
A0A0C4DH29	A0A0C4DH29	#N/A	IGHV1-3	IGHV1-3	24.4761	22.4038	22.8505	22.4757	26.4489	26.9062	26.3126	23.7257	23.8224	24.6807	24.994	22.2979	26.2804	26.2038	23.4443	23.3899	23.3803	26.9662	26.1121	23.7558	23.5577	22.9677	26.9756	22.6824	22.2005	24.7424	23.3617	27.0814	25.9475	25.0459	25.272	23.6127	23.545	27.2233	23.5623	23.4184	23.8161	26.5347	26.7121	25.3371	26.928	25.5328	22.9167	25.0777	23.8369
A0A0C4DH31	A0A0C4DH31	#N/A	IGHV1-18	IGHV1-18	25.3886	25.2934	24.7638	23.8684	23.2245	23.9512	22.4143	23.9411	25.5555	21.9558	22.5434	24.486	23.0624	24.7085	23.1985	24.0026	23.6848	23.6555	25.8266	22.9897	22.2038	24.0109	22.9777	22.3246	23.5239	26.5551	26.4964	24.1124	24.9803	23.4572	24.3113	23.9459	27.5835	25.9181	25.9417	27.2456	23.96	24.3413	26.6663	26.9459	24.5421	23.2269	25.3185	22.8418	24.8238
A0A0C4DH38	A0A0C4DH38	#N/A	IGHV5-51	IGHV5-51	26.628	25.9045	26.7902	24.5301	27.2825	22.5658	25.5668	26.8422	24.0017	23.1226	23.8382	25.8085	24.7475	25.9482	27.0857	24.9326	25.5613	22.3015	25.6692	25.5324	24.087	24.5239	27.6451	24.2935	26.7626	28.2377	26.7563	27.864	24.1327	22.58	26.698	23.0793	28.2675	26.2728	24.4005	27.9423	25.3396	25.1808	27.9679	27.4324	25.9553	27.1617	23.6889	26.7759	26.8845
A0A0C4DH67;A0A0C4DH69	A0A0C4DH67;A0A0C4DH69	#N/A	IGKV1-8	IGKV1-8	23.447	25.5726	24.2298	24.4175	23.376	22.6033	23.1705	24.7638	25.517	25.8707	22.1757	23.4288	24.4945	25.2153	22.8046	24.3677	25.6884	24.7247	22.9149	25.4366	24.4961	23.9157	24.0998	23.8424	26.0573	25.9397	24.1437	26.7558	25.3956	25.2667	26.9156	23.7273	25.7635	26.4854	25.9123	27.137	25.5857	24.2104	27.086	25.8453	26.05	23.5934	24.0709	25.0938	22.1879
A0A0C4DH72	A0A0C4DH72	#N/A	IGKV1-6	IGKV1-6	25.5474	23.0792	23.5951	24.8687	23.3288	23.185	24.1687	24.1241	23.908	25.3174	25.0019	24.7796	22.193	24.4426	23.6499	24.121	24.3531	23.2177	24.5326	22.3125	22.0661	23.7925	24.6404	22.803	23.9349	26.7977	25.8781	25.0219	24.2575	23.3933	24.6733	24.371	27.4261	25.2068	22.5987	26.8428	23.8928	26.1305	27.1391	26.2803	25.7042	24.2727	24.8896	23.6154	22.5167
A0A0D9SEI0;Q9P0P8	A0A0D9SEI0;Q9P0P8	Uncharacterized protein C6orf203	C6orf203	C6orf203	26.7982	25.486	26.5433	27.0132	26.5171	26.4159	26.5333	26.6656	26.9451	26.8254	27.2931	26.3141	27.1512	26.3678	26.6995	26.5748	26.6487	27.7956	27.5894	27.119	27.2275	27.3449	26.429	27.043	26.8237	25.4298	27.5275	27.9339	23.6208	26.9466	25.8938	26.8208	27.0335	25.9383	27.6693	27.2406	27.2989	26.8495	25.1925	27.4105	25.3294	28.258	25.9373	27.5861	27.4047
Q5T321;A0A0D9SF28;F5GXV7;Q8NFP9;Q8NFP9-3;Q8NFP9-2	Q5T321;A0A0D9SF28;F5GXV7;Q8NFP9	Neurobeachin	NBEA	NBEA	30.5864	30.5587	29.4865	29.8909	30.8954	30.0846	30.3646	29.6903	30.442	28.8407	28.6765	29.3524	27.8391	27.8138	27.159	27.8553	27.8427	28.5101	28.7236	28.3856	26.8933	27.1236	28.4251	28.3073	26.8628	27.2212	26.078	28.8167	27.8693	29.0678	29.2283	28.566	26.8437	28.1367	29.5525	29.3726	23.6905	26.6883	27.551	29.4608	26.6238	30.5464	30.1642	31.6915	29.9524
A0A0D9SFB3;A0A2R8YF78;A0A0D9SG12;A0A2R8YFS5;A0A2R8Y4A4;A0A0D9SF53;O00571;A0A2R8Y5G6;O00571-2;F6S8Q4;A0A2R8YDT5;A0A2R8Y7T2;A0A2R8YDH3;A0A0J9YVQ7;A0A087WVZ1;A0A2R8YCU0;A0A2R8Y650;A0A087WX09;A0A2R8Y4D2;D6RCM4;Q9NQI0-3;Q9NQI0-2;Q9NQI0-4;Q9NQI0;A0A2R8Y770;H0Y960	A0A0D9SFB3;A0A2R8YF78;A0A0D9SG12;A0A2R8YFS5;A0A2R8Y4A4;A0A0D9SF53;O00571;A0A2R8Y5G6;O00571-2;F6S8Q4;A0A2R8YDT5;A0A2R8Y7T2;A0A2R8YDH3	ATP-dependent RNA helicase DDX3X	DDX3X	DDX3X	30.8646	30.7965	30.7864	30.637	30.366	30.8188	31.0788	31.0056	30.6813	30.7096	30.5973	30.6371	30.9384	31.8755	31.767	31.4305	31.7602	31.0654	31.2341	31.2973	30.875	31.3094	30.9785	31.6043	30.9022	31.0945	30.8879	30.7972	31.015	30.9295	31.0798	30.7888	30.9463	31.1184	30.7115	30.9161	30.9657	30.9271	30.8837	31.1168	31.1846	30.5091	31.1231	30.7076	30.9734
A0A0D9SF54;A0A0D9SFF6;A0A0D9SFH4;A0A1B0GTB7;A0A1B0GV13;A0A1B0GW19;A0A1B0GWE2;A0A1B0GUH3	A0A0D9SF54	#N/A	SPTAN1	SPTAN1	28.4917	29.0088	28.8575	28.666	28.459	28.2259	28.4056	28.5805	28.464	29.0387	28.0113	28.1172	28.2994	28.7065	29.0667	28.2184	28.0204	28.3165	28.9573	28.9025	28.2464	28.1249	27.7891	28.1723	28.6707	27.6664	28.9998	23.2544	29.0037	28.5575	28.8044	28.3627	29.0526	29.3032	29.5839	29.1995	27.5029	28.0751	28.2681	28.9759	28.5884	29.5225	27.8463	28.2795	28.0092
A0A0D9SFK2;Q92614-4;Q92614;Q92614-3;Q92614-2;Q92614-5;H0YEV9	A0A0D9SFK2;Q92614-4;Q92614;Q92614-3;Q92614-2;Q92614-5	Unconventional myosin-XVIIIa	MYO18A	MYO18A	31.0203	31.2808	30.6384	30.1777	31.2111	31.0465	31.0568	30.5194	30.9154	30.7631	30.089	30.8448	30.3765	30.7378	30.4988	30.2	30.5287	30.4352	30.263	30.6649	30.1728	30.9069	30.5539	30.8075	31.1197	30.9185	31.363	30.7695	31.0357	31.4426	30.8355	31.0049	31.1965	30.9227	30.9454	30.7865	30.1111	30.5537	30.8151	30.8212	30.4475	29.7559	30.6809	30.6015	30.5528
A0A0D9SG72;P61764;A0A1B0GWF2;A0A1B0GVQ5;A0A2R8Y5D4;A0A1B0GTP9;P61764-2;A0A1B0GW76;A0A0D9SFQ7;A0A0D9SFW6;A0A0D9SEP9;A0A0D9SEH5;A0A096LP52;A0A096LP33;A0A1B0GVV9	A0A0D9SG72;P61764;A0A1B0GWF2;A0A1B0GVQ5;A0A2R8Y5D4;A0A1B0GTP9;P61764-2;A0A1B0GW76	Syntaxin-binding protein 1	STXBP1	STXBP1	27.464	27.3909	23.5929	27.0162	27.3063	27.8182	27.1169	26.881	26.9715	26.9479	26.6812	27.598	26.5217	26.8098	24.8846	27.0379	26.9259	26.9899	26.7471	26.5439	27.0869	26.1425	25.849	26.602	27.091	27.0136	27.8232	26.6883	27.3283	25.9054	26.7819	28.3292	28.562	27.2206	27.2949	27.0081	26.4673	27.1071	28.2421	26.7339	27.136	27.0403	26.2859	27.087	26.8872
A0A0D9SGF6	A0A0D9SGF6	#N/A	SPTAN1	SPTAN1.1	36.1861	36.0474	36.1622	35.789	35.9274	35.9797	36.0463	35.9023	35.8972	35.8914	35.6302	35.8668	35.8034	35.6134	35.914	35.6733	36.1356	35.9224	35.9692	35.6934	35.7279	35.8923	35.7879	35.695	35.927	35.9437	36.4351	36.0957	36.3167	36.2011	36.0258	36.2326	36.173	36.2016	36.1216	36.0515	35.711	36.0938	35.8402	36.2946	36.3271	35.8991	35.854	36.172	35.8846
A0A0G2JH68;O60610;A0A140T8Z0;O60610-2;O60610-3;A0A2R8Y5N1;B4E2I7;A0A2R8YEF8	A0A0G2JH68;O60610;A0A140T8Z0;O60610-2;O60610-3;A0A2R8Y5N1	Protein diaphanous homolog 1	DIAPH1	DIAPH1	28.143	26.9441	25.0803	27.4815	27.5142	25.6033	26.7579	25.5029	26.2235	26.3064	26.6835	27.5647	26.7742	29.2844	28.2289	28.2103	26.2671	25.7763	26.5089	28.2195	26.1508	25.4192	22.6962	28.3269	26.9489	26.1534	27.6872	27.5451	25.4116	24.489	24.9409	24.7718	26.7158	26.4242	26.7962	26.4671	28.7221	27.1605	27.5251	26.7841	26.2494	22.8774	27.5624	26.79	26.6269
A0A0G2JIW1;P0DMV9;P0DMV8;P0DMV8-2;V9GZ37	A0A0G2JIW1;P0DMV9;P0DMV8;P0DMV8-2;V9GZ37	Heat shock 70 kDa protein 1B;Heat shock 70 kDa protein 1A	HSPA1B	HSPA1B	35.4972	35.4992	35.2581	35.6728	35.5424	35.5045	35.4429	36.0642	35.2744	35.379	35.6442	35.6482	35.2704	35.9743	35.6046	35.9594	35.2471	35.3516	35.161	35.7854	35.0312	35.407	35.4875	35.9034	35.1577	35.2927	34.9883	35.3858	35.05	35.1773	35.3677	35.5187	35.0194	35.5036	35.4381	35.4219	35.7408	35.312	35.1285	35.3936	34.922	35.251	35.6733	35.3136	35.4072
A0A0G2JJD3;O95870;O95870-2;A0A0G2JI89;F2Z3H2;F2Z3G6	A0A0G2JJD3;O95870;O95870-2	Abhydrolase domain-containing protein 16A	ABHD16A	ABHD16A	27.8558	28.1928	28.7744	27.6675	27.6705	28.1957	27.9123	27.3843	27.7719	28.8655	28.5579	27.9399	27.1136	27.503	27.5249	28.3291	28.2466	28.4386	27.7159	28.2682	28.7415	28.0882	28.2772	28.7691	28.0767	28.1641	28.7083	27.9155	28.5247	27.7041	28.2719	28.9387	28.5818	25.9377	28.3433	27.6082	27.6594	28.0949	29.1199	26.0934	28.1353	27.4872	27.7298	27.0517	27.4897
A0A182DWF4;A0A0G2JJV3;Q5EP54;A0A182DWG2;A0A140T9A5;A0A140T966;A0A182DWF5;A0A140T9Q1;A0A140T928	A0A182DWF4;A0A0G2JJV3;Q5EP54;A0A182DWG2;A0A140T9A5;A0A140T966;A0A182DWF5;A0A140T9Q1;A0A140T928	#N/A	HLA-DPB1	HLA-DPB1	25.6564	23.9668	23.0893	23.1701	24.5298	23.2308	22.0488	26.1792	26.9584	25.842	24.0285	24.72	22.007	26.076	27.5432	25.2937	27.4822	22.7475	23.4589	25.4564	26.3268	25.3413	26.0032	24.0141	26.1035	26.5599	25.544	26.3225	25.6245	24.8042	22.9307	25.0882	27.2924	23.1647	26.5006	26.4012	25.569	24.2527	23.9002	23.5725	25.1177	26.1264	27.1166	23.1321	24.5627
A0A0G2JMH6;P01903;Q30118;A0A0G2JH46	A0A0G2JMH6;P01903;Q30118;A0A0G2JH46	HLA class II histocompatibility antigen, DR alpha chain	HLA-DRA	HLA-DRA	28.5067	28.2934	28.3771	28.4532	28.6991	27.6811	28.3196	28.5089	30.1137	29.6248	28.197	28.7694	29.1305	28.867	28.5997	28.5622	28.1309	27.9766	28.9791	28.3562	30.0258	27.5731	28.6708	28.2851	29.88	27.9643	29.4793	29.5609	28.873	28.9785	28.8246	29.1343	29.94	29.2141	29.0655	29.0411	28.2191	29.0903	29.1662	29.3274	28.4993	29.368	28.8747	29.2529	28.3668
A0A0G2JNW7;Q9Y666;A0A0G2JQE3;H0YB78;Q9Y666-2	A0A0G2JNW7;Q9Y666;A0A0G2JQE3;H0YB78	Solute carrier family 12 member 7	SLC12A7	SLC12A7	25.399	25.4952	23.5047	24.2308	25.7591	22.6059	23.444	24.9287	21.9299	26.5271	24.049	24.0108	22.6978	25.4901	25.6458	25.1677	26.2727	25.1739	25.333	25.5688	25.3972	25.8468	25.5544	25.6086	24.8978	24.1981	22.9808	23.7482	25.3996	25.516	23.7924	24.1678	22.1747	24.7437	25.1868	24.4974	25.3492	24.7164	24.1848	23.1816	22.3896	25.8654	23.6691	23.9983	25.719
E9PNT2;E9PIR1;A0A0G2JRG8;A0A0G2JNY3;Q6ZUM4-2;Q6ZUM4;A0A0C4DGE6;Q6ZUM4-3;E9PNX6	E9PNT2;E9PIR1;A0A0G2JRG8;A0A0G2JNY3;Q6ZUM4-2;Q6ZUM4;A0A0C4DGE6;Q6ZUM4-3	Rho GTPase-activating protein 27	ARHGAP27	ARHGAP27	31.6648	24.9378	24.2963	31.178	23.3932	23.9974	23.5545	29.4195	21.8424	31.6363	24.9346	26.2808	22.9397	23.8505	22.6825	31.3095	31.3284	29.2465	23.2728	31.449	22.2099	31.306	29.202	24.8059	23.5091	29.7051	24.4817	23.5329	23.185	29.1171	31.5957	31.7771	25.2473	23.9973	24.2303	24.0443	24.7742	27.1557	25.1963	22.1718	26.3354	25.8277	23.3223	26.5363	26.1064
A0A0G2JNZ2;A0A0G2JPP5;Q14160;Q14160-3;A0A0G2JMS7;Q14160-2;H0YCG0;H0YDF9	A0A0G2JNZ2;A0A0G2JPP5;Q14160;Q14160-3;A0A0G2JMS7;Q14160-2	Protein scribble homolog	SCRIB	SCRIB	27.1033	27.1561	27.1049	27.4431	24.0101	23.861	26.9109	27.9568	23.195	24.4236	23.6805	23.2952	24.6671	27.5961	27.2777	26.513	27.1397	26.4987	26.4591	23.3195	27.6547	26.1839	27.1036	27.7505	21.7232	27.5319	27.2195	23.433	27.0524	24.4177	26.669	27.2516	24.2992	27.3692	22.4715	26.7334	23.9938	27.0591	26.8724	27.1657	27.373	24.5696	25.7518	22.5419	25.1603
Q8MH48;Q5RJ85;A0A0G2JPQ3;P17693-5;P17693;P17693-4	Q8MH48;Q5RJ85;A0A0G2JPQ3;P17693-5;P17693	HLA class I histocompatibility antigen, alpha chain G	HLA-G	HLA-G	24.1357	26.3497	27.6443	24.7517	26.0771	24.9232	27.3204	27.8823	24.6304	24.033	26.5785	27.2111	26.6525	22.7079	22.4364	23.6852	27.2431	27.2516	27.2797	26.6691	27.0641	27.1071	26.6077	23.3539	24.2182	23.5369	28.349	26.2476	24.8794	25.6996	27.6693	27.0589	22.0377	23.8338	26.4941	27.2896	28.2638	26.5017	26.4066	26.1407	26.7398	22.8173	23.0934	27.0582	24.5173
A0A0J9YX62;O75190-3;C9J2C4;C9J2P2;C9JDX6;F8WCZ4;C9JDR7;C9JB42;C9JN01;Q8WWF6;Q8NHS0;Q7Z6W7	A0A0J9YX62;O75190-3;C9J2C4;C9J2P2	DnaJ homolog subfamily B member 6	DNAJB6	DNAJB6	29.6625	29.5954	29.5526	29.4629	29.8026	29.2143	29.7318	29.7239	28.9607	29.9218	29.3967	29.4931	29.6978	29.8249	29.9372	29.6444	29.2735	29.4397	29.8207	29.3483	29.5539	29.531	29.661	29.4547	29.6437	29.6405	29.9214	29.5159	29.6186	29.2976	29.5842	29.5427	29.7921	29.4487	29.6378	29.8229	29.5567	29.691	29.601	29.3571	29.8607	29.8679	29.6468	28.8475	29.3671
A0A0J9YXC7	A0A0J9YXC7	#N/A	LIMS4	LIMS4	24.9274	24.916	22.8414	25.0933	24.437	25.4026	24.5256	24.2995	24.1631	25.4077	22.3904	25.7632	24.9037	22.2473	24.1673	22.3999	24.3757	24.2582	21.8811	23.6368	22.2726	22.6589	21.5726	25.5567	24.2998	24.1377	24.879	24.9981	24.6332	22.6128	24.0518	23.3449	23.2665	23.6302	23.8658	23.9668	21.7086	25.3131	25.0328	24.3093	24.3439	23.8612	25.2084	25.8899	25.8073
J3QT77;A0A0J9YYG4;A0A0J9YXF2;Q15165-3;Q15165-1;Q15165;G3XAK4;A0A0J9YYJ1;A0A0J9YXU7;A0A2Q2SAK4;A0A0J9YXM1	J3QT77;A0A0J9YYG4;A0A0J9YXF2;Q15165-3;Q15165-1;Q15165;G3XAK4	Serum paraoxonase/arylesterase 2	PON2	PON2	27.5734	27.0051	27.8395	27.9586	28.0338	27.4229	27.5221	27.7445	28.2272	27.5931	27.7831	27.0388	27.5749	27.8534	26.3269	27.7177	27.8974	28.146	27.5782	27.5343	26.0453	27.5419	26.9412	27.2388	27.8931	27.7559	28.7021	27.8217	27.8957	28.2062	27.8062	28.1231	29.1027	28.0361	25.3606	27.9388	27.5344	24.6704	28.3866	27.5445	27.9648	27.918	26.94	29.2585	27.5476
E9PC62;A0A0J9YXJ0;V9GYD9;Q5VZZ6;A0A0J9YX66;A0A1B0GU44;A0A1B0GUN8;O95319-5;O95319-2;O95319;O95319-4;O95319-3;V9GY47;A0A0J9YXK1	E9PC62;A0A0J9YXJ0;V9GYD9;Q5VZZ6;A0A0J9YX66;A0A1B0GU44;A0A1B0GUN8;O95319-5;O95319-2;O95319;O95319-4;O95319-3	CUGBP Elav-like family member 2	CELF2	CELF2	29.3207	25.2539	22.7687	22.8556	23.1087	24.8973	26.7977	26.4422	26.4951	27.2054	26.3013	26.0922	25.5966	26.8181	26.8341	26.4597	26.4294	23.3702	26.0757	26.8733	26.7351	26.6051	27.1493	26.2062	27.0308	27.057	24.1676	26.4478	26.1993	26.407	26.9855	26.1836	27.0196	23.9938	26.3943	27.2429	22.3488	26.4937	25.9	26.0185	25.8305	26.6988	26.0187	23.8863	23.4753
A0A0J9YXN7;Q96Q06	A0A0J9YXN7;Q96Q06	Perilipin-4	PLIN4	PLIN4	28.2844	27.537	27.4364	27.6392	28.5519	28.0561	28.3704	26.8428	28.2271	28.9613	27.852	27.9261	28.62	28.4653	28.6577	27.4289	28.8707	28.7282	28.751	28.1443	28.8057	28.8735	29.4006	28.8548	28.6127	29.8217	28.5038	29.0075	27.7674	28.7711	29.0839	28.8584	25.3597	28.3511	27.1454	29.2241	28.7267	29.5478	24.1529	27.9167	28.7469	27.2677	27.2339	26.3061	27.6749
A0A0J9YYF7;Q86T65-4;Q86T65;A0A0J9YX09;F2Z2Q2	A0A0J9YYF7;Q86T65-4;Q86T65	Disheveled-associated activator of morphogenesis 2	DAAM2	DAAM2	26.8675	24.1586	26.5606	26.2882	27.4669	26.7866	23.4988	25.9681	23.5146	23.4975	24.1789	25.512	25.5502	22.5914	26.2911	24.054	24.1709	22.9537	24.6518	22.6895	26.148	23.0341	24.3533	25.3811	25.7872	24.1783	24.7067	23.3198	23.8871	26.8054	26.8818	25.9687	24.0781	24.7091	24.0922	23.1022	23.508	26.4764	24.0244	26.6483	25.0908	24.987	26.3832	23.1968	26.0559
A0A0R4J2G3;Q6PIU2;A0A0A0MTJ9;Q6PIU2-2;Q6PIU2-3;H7C046;F8WE33	A0A0R4J2G3;Q6PIU2;A0A0A0MTJ9;Q6PIU2-2;Q6PIU2-3;H7C046	Neutral cholesterol ester hydrolase 1	NCEH1	NCEH1	31.4596	31.0206	31.6675	30.2852	30.546	30.9831	31.4885	31.1517	31.1029	31.8495	31.9193	31.4687	31.4009	31.3359	31.6424	30.8081	30.9031	31.3517	31.2327	31.3855	31.282	31.3022	31.0258	31.2991	31.4766	30.9825	31.528	31.5655	31.5299	31.1397	31.4667	31.2469	31.1915	31.3416	32.3484	31.6029	30.6074	31.1661	29.765	31.4766	31.6765	31.8406	31.5179	31.3525	31.261
A0A3B3ISJ1;A0A0S2Z4L3;P07225;G5E9F8;A0A3B3IRK9;H7BXT0;A0A3B3IUA6;C9K0R0;A0A3B3ITZ7	A0A3B3ISJ1;A0A0S2Z4L3;P07225;G5E9F8;A0A3B3IRK9	Vitamin K-dependent protein S	PROS1	PROS1	28.9313	27.4899	28.5539	28.3845	27.2174	29.4071	26.9605	27.3248	25.6419	25.7682	25.0523	25.7331	24.3113	27.0644	26.5123	25.9922	24.7384	27.0039	24.1771	26.6883	23.4035	25.6204	23.4675	27.1332	27.1207	27.5677	27.0964	27.5593	24.0337	25.1005	25.1284	24.3126	28.5923	24.5396	29.0358	27.2289	28.3724	24.2366	29.7322	27.6717	26.1385	27.3659	27.6537	28.164	28.5419
A0A0U1RQK4;Q8NDY3;Q8NDY3-2;X6RL45	A0A0U1RQK4	#N/A	ADPRHL1	ADPRHL1	33.4976	32.5432	33.1192	33.3338	33.4446	32.9234	33.6914	33.0008	33.3913	31.9261	32.991	33.1646	33.042	33.5422	33.3688	33.0539	33.1665	33.2939	33.3828	33.7089	32.5909	33.3523	33.4579	33.8206	33.6549	32.4294	33.5562	33.1417	33.3819	33.0928	33.0405	33.0915	32.435	33.0451	32.8362	32.771	33.5225	33.3542	32.9372	33.628	33.1724	33.3779	33.7271	33.3185	33.652
A0A0U1RQQ9;Q6P3W7;F8VSC5;H0YI32;H0YIK6	A0A0U1RQQ9;Q6P3W7;F8VSC5	SCY1-like protein 2	SCYL2	SCYL2	24.5523	25.2384	26.7762	24.3429	25.4706	25.5168	25.9235	25.5799	24.0158	23.5309	24.3382	23.2437	25.6192	25.9397	24.4755	24.5565	26.0552	25.9293	23.8919	24.8683	25.4084	24.725	24.9219	25.532	25.4052	26.2159	23.0575	26.1302	23.3295	25.6197	27.192	22.4741	25.3508	25.4168	24.9853	26.6174	24.4632	24.4953	22.9303	25.7114	25.1526	26.9625	24.8406	25.7604	25.1783
A0A0U1RQW6;Q9Y2E4-2;H0Y5A8;H0Y7Q3	A0A0U1RQW6	#N/A	DIP2C	DIP2C	26.1099	26.3576	24.009	24.7463	25.9268	22.8481	25.956	26.6363	26.5487	27.1512	26.9095	27.1359	26.5367	26.9281	23.2648	25.4629	26.8975	27.262	26.2949	26.9536	26.404	26.5777	24.4491	26.7079	24.7901	24.5822	23.7676	26.952	26.5126	27.6277	26.8287	26.3816	25.6959	26.823	26.5082	26.8118	26.108	26.6102	23.0992	25.7876	26.4653	25.2256	26.2611	24.6482	25.9757
A0A0U1RR20;Q92954-4;Q92954-3;Q92954-6;Q92954-2;Q92954;Q92954-5;J3KP74	A0A0U1RR20;Q92954-4;Q92954-3;Q92954-6;Q92954-2;Q92954;Q92954-5	Proteoglycan 4;Proteoglycan 4 C-terminal part	PRG4	PRG4	23.6724	29.1997	25.7209	28.1608	27.9443	24.3371	25.9807	25.4226	24.4297	27.0275	23.3251	23.5869	23.1821	25.0242	24.9266	25.1219	25.0574	26.0251	25.4642	25.6861	22.5789	22.4827	25.8558	22.2678	24.1447	28.3855	23.4997	22.8558	27.4077	24.2837	24.4849	27.5943	28.1519	23.9385	22.9803	25.3516	23.9916	25.7243	25.4385	26.9659	26.9507	27.6065	24.4306	26.2238	24.2957
A0A0U1RR32;A0A0U1RRH7;P20671;Q99878;Q96KK5;Q9BTM1;P0C0S8;Q7L7L0;P04908;H0YFX9;A0A3B3IS11;Q93077;Q9BTM1-2	A0A0U1RR32;A0A0U1RRH7;P20671;Q99878;Q96KK5;Q9BTM1;P0C0S8;Q7L7L0;P04908;H0YFX9;A0A3B3IS11;Q93077;Q9BTM1-2	Histone H2A type 1-D;Histone H2A type 1-J;Histone H2A type 1-H;Histone H2A.J;Histone H2A type 1;Histone H2A type 3;Histone H2A type 1-B/E;Histone H2A;Histone H2A type 1-C	hCG_2039566	hCG_2039566	33.7178	33.6082	33.8016	33.448	33.3676	33.4304	33.4088	33.3902	33.8649	34.4679	34.3035	33.6174	33.7744	33.8932	33.8584	34.0674	34.6097	34.1594	34.0672	33.4545	34.0955	33.9846	33.9398	33.3181	33.113	34.2668	33.8031	34.4105	33.9397	34.3132	33.9936	34.5088	34.4203	34.7038	35.1804	34.6241	34.7265	33.3058	33.4718	34.2833	33.9115	34.5625	33.9502	33.6366	33.4765
A0A0U1RR70;Q8N568-3;G5E9L9;Q8N568-2;Q8N568;A0A0U1RRD0	A0A0U1RR70;Q8N568-3;G5E9L9;Q8N568-2;Q8N568	Serine/threonine-protein kinase DCLK2	DCLK2	DCLK2	23.8551	26.1561	24.0901	25.2783	24.5427	26.3618	26.4761	24.1839	23.7745	26.7238	26.427	23.9131	24.8455	25.8888	24.7256	23.3588	23.2841	27.4834	27.4113	23.5853	24.1067	23.1471	23.9476	27.2922	25.9275	24.2091	24.9008	24.5937	27.1461	23.9106	23.257	23.4306	23.4844	23.1648	25.9743	26.2091	24.9668	24.7726	25.3594	27.2645	25.5717	26.3015	26.3668	22.968	26.1597
A0A0U1RRB6;Q9Y2D4;J3QT38;Q9Y2D4-2;F8W6R7	A0A0U1RRB6;Q9Y2D4;J3QT38;Q9Y2D4-2	Exocyst complex component 6B	EXOC6B	EXOC6B	26.1321	25.9956	24.6645	27.1315	27.2506	27.2503	26.8152	26.1874	27.3457	27.8235	28.2798	27.4734	27.5098	28.0738	27.1465	27.0712	25.6467	25.8778	27.2863	27.4058	28.0282	26.6253	28.1449	27.2641	27.3929	27.1283	27.6386	27.2205	26.2649	26.869	27.4269	25.3219	29.2243	26.8656	26.7152	28.1907	29.3025	27.3697	28.1869	28.0904	27.8291	26.337	28.2038	26.9851	26.3813
A0A0U1RRL8;Q8TB22;Q8TB22-2;Q8TB22-3;Q8TB22-4;H0Y9W3	A0A0U1RRL8;Q8TB22;Q8TB22-2;Q8TB22-3;Q8TB22-4	Spermatogenesis-associated protein 20	SPATA20	SPATA20	30.0053	30.2651	28.9202	30.3277	29.6173	26.5432	30.1488	30.2373	29.9943	30.9473	29.2463	28.9448	29.0129	29.7489	29.9525	28.7149	29.5947	30.1595	30.6379	30.253	30.5358	29.982	29.5459	30.1306	30.0671	30.6194	28.6506	30.4416	29.8201	30.4487	30.1161	30.1039	29.8936	29.5454	29.6272	29.4723	27.4224	30.3726	29.7965	30.008	26.6921	30.696	29.9829	28.9647	30.0674
O19617;A2AEA2;A0A140T9H5;P10321;A0A140T921;A0A140T9U8;A0A1W2PRU9	O19617;A2AEA2;A0A140T9H5;P10321;A0A140T921;A0A140T9U8;A0A1W2PRU9	HLA class I histocompatibility antigen, Cw-7 alpha chain	HLA-C	HLA-C	26.3781	23.8404	26.7615	23.2769	23.7171	23.8444	23.6244	24.4979	25.7543	24.5274	22.3935	26.3438	24.9115	25.0634	26.8464	26.2647	26.4635	23.2764	24.0181	23.5495	25.7783	23.878	24.6669	25.4936	26.5345	24.2894	26.6893	23.7112	25.3638	25.2748	26.2406	25.7293	26.0029	24.3838	24.8917	25.9745	23.6553	26.4928	28.3863	24.6091	26.37	25.1391	25.2306	25.8912	26.8809
A0A140T9J9;Q29963;A0A1W2PR11;A0A140T962;A0A140T9B3;A0A1W2PRX1;A0A1W2PP77;A0A140TA05;A0A140T9L3;A0A140T9E1;F8W9Z8;A0A140TA12;Q31611;A0A0G2JNX1;P17693-6;P17693-2;A0A0G2JPT2	A0A140T9J9;Q29963;A0A1W2PR11;A0A140T962;A0A140T9B3;A0A1W2PRX1;A0A1W2PP77	HLA class I histocompatibility antigen, Cw-6 alpha chain	HLA-C	HLA-C.1	25.0169	23.8686	25.7545	25.7031	24.2118	24.8116	25.0957	24.7583	23.7013	23.39	24.7268	24.2046	26.9989	23.1304	23.9231	23.4993	24.3901	23.4127	24.1432	22.5671	25.175	22.8793	29.5297	27.7638	27.4244	23.259	28.1537	23.0081	21.9202	25.5528	23.4373	26.8405	23.7206	25.5948	24.8521	24.3475	24.4358	22.9466	22.5869	22.8948	26.1087	24.9445	25.4833	22.5435	26.7246
A0A140T9T7;Q03518;A0A0S2Z4R8	A0A140T9T7;Q03518	Antigen peptide transporter 1	TAP1	TAP1	26.8303	24.4096	23.4245	21.8138	24.5698	25.614	25.5019	26.0195	25.5128	27.0192	21.7864	26.0751	24.4059	26.892	23.4904	26.3047	26.2398	26.5343	25.9318	25.7602	26.1477	25.6762	22.1042	25.8197	26.4289	26.4601	26.3617	25.8231	24.0567	25.6236	26.3942	26.0062	25.7069	25.7525	25.3104	24.6831	25.3658	24.2277	23.5621	25.4108	22.1806	25.6292	23.9337	23.3011	23.2466
A0A140TA41;A0A140T9C0;P22105-1;P22105;P22105-4;A0A140T8Z8;A0A140T956;A0A140T9L7;A0A087X0I0;P22105-2	A0A140TA41;A0A140T9C0;P22105-1;P22105;P22105-4;A0A140T8Z8;A0A140T956	Tenascin-X	TNXB	TNXB	26.489	26.1547	27.1626	27.5519	23.8658	23.382	27.0938	24.7122	23.6738	25.2114	24.9455	25.0801	26.0956	24.5677	23.5189	24.7527	23.5288	24.3612	25.1637	22.6911	24.4303	23.2044	26.0374	23.7294	26.1693	25.7976	23.5933	27.1075	23.8625	26.0326	24.093	23.6858	27.4982	25.479	27.6005	27.0266	23.0059	24.2034	26.9773	26.1523	24.7647	24.9688	25.6738	27.2782	25.8294
A0A140TA86;Q5XKP0;K7EIR2;A0A140TA84	A0A140TA86;Q5XKP0;K7EIR2;A0A140TA84	Protein QIL1	C19orf70	C19orf70	30.587	31.1493	31.0951	30.7296	31.0466	30.9043	30.8842	30.8533	31.3857	31.4263	31.2258	31.4747	31.2551	30.5603	31.2593	30.8761	31.2837	31.6602	31.3175	31.1891	31.5106	31.2911	31.3017	31.2356	30.4222	31.6063	31.0621	31.136	31.5193	31.2808	31.0686	31.3592	30.5742	31.482	29.9806	31.5413	30.187	31.0085	30.1647	30.8144	30.7293	30.8367	30.0969	30.5972	30.0424
A0A182DWF2;A0A182DWF3;Q9NNW7-2;Q9NNW7;D3YTF8;A0A096LPK7;Q9NNW7-3;Q9NNW7-4;A0A096LPD9;E7EWK1;A0A096LNY7	A0A182DWF2;A0A182DWF3;Q9NNW7-2;Q9NNW7;D3YTF8;A0A096LPK7;Q9NNW7-3;Q9NNW7-4;A0A096LPD9;E7EWK1	Thioredoxin reductase 2, mitochondrial	TXNRD2	TXNRD2	30.7196	30.1394	30.5845	30.2144	30.4064	30.3679	30.5846	30.3877	31.1602	31.1441	31.1816	31.2575	31.2035	30.6408	30.6674	30.969	30.6702	30.7954	30.7693	30.5493	31.4181	30.681	30.8048	30.2754	31.0492	30.288	30.765	30.7764	30.4839	29.9448	30.6785	30.9278	30.126	30.3104	30.4233	30.2286	30.8268	30.9367	30.6677	31.1805	31.0594	30.833	30.6664	30.8599	30.9405
A0A182DWI3;Q16881-6;F8W809;A0A087WSW9;A0A087WSY9;Q16881-5;Q16881-2;Q16881-4;Q16881-3;Q16881;E9PIR7;E2QRB9;Q16881-7;E9PKD3;A0A0B4J225;E9PIZ5;E9PLT3;E9PKI4;E9PQI3;E9PJU2;E9PRI8	A0A182DWI3;Q16881-6;F8W809;A0A087WSW9;A0A087WSY9;Q16881-5;Q16881-2;Q16881-4;Q16881-3;Q16881;E9PIR7;E2QRB9;Q16881-7	Thioredoxin reductase 1, cytoplasmic	TXNRD1	TXNRD1	31.3832	31.7435	31.181	31.7009	31.9429	31.8394	31.5885	31.2199	31.4374	31.4429	31.1166	31.4802	30.9664	32.007	31.504	31.6628	30.7405	31.1509	31.1107	31.8097	31.4531	30.9104	30.8469	31.9091	31.4745	32.3866	31.4159	31.5498	31.7962	31.2438	30.9786	31.2057	30.8516	31.2804	31.3956	31.6218	31.4067	31.5961	31.655	31.6435	31.6486	31.1925	31.5611	31.6405	31.4822
A0A1B0GTC3;A0A1B0GVH5;Q9C0B1;A0A1B0GUC3;A0A1B0GV98;A0A1B0GTC5;A0A1B0GU26;A0A1B0GTY1;A0A1B0GUY7;A0A1B0GTI3;Q9C0B1-4;Q9C0B1-2;A0A1B0GTZ8;Q9C0B1-3;F8WCB8	A0A1B0GTC3;A0A1B0GVH5;Q9C0B1;A0A1B0GUC3;A0A1B0GV98;A0A1B0GTC5;A0A1B0GU26;A0A1B0GTY1	Alpha-ketoglutarate-dependent dioxygenase FTO	FTO	FTO	25.303	24.8824	25.7169	26.1686	25.6437	26.7297	25.8632	25.3687	25.4851	26.2841	26.0839	25.7553	24.4706	26.2598	26.7384	26.4441	26.1321	24.7444	24.8005	26.3218	26.903	26.4697	26.4832	25.4654	26.4862	26.3457	26.2737	26.9663	24.9913	26.0057	25.9089	26.772	23.0026	26.8485	23.441	27.3271	25.3263	23.2166	26.0919	23.7639	26.8142	23.8861	22.9708	25.3777	23.5332
A0A1B0GWJ0;A0A1B0GTJ7;P30566;A0A0A6YY92;P30566-2;A0A096LNY6;A0A1B0GWF8;A0A1B0GTG9;A0A096LNY5;A0A096LPA2;A0A096LP92;A0A096LNY4;A0A096LP76;B4DEP1;A0A096LP72;V9GY96;A0A1W2PRX2;A0A096LNT0	A0A1B0GWJ0;A0A1B0GTJ7;P30566;A0A0A6YY92;P30566-2;A0A096LNY6;A0A1B0GWF8;A0A1B0GTG9	Adenylosuccinate lyase	ADSL	ADSL	29.4516	29.9073	29.658	29.8076	29.9076	29.4944	29.8563	29.8964	29.8161	28.9775	29.9355	29.7872	29.5442	30.333	29.7636	29.3925	30.0935	29.5283	29.6875	29.7443	30.0424	30.2256	29.5754	29.441	29.8289	29.684	29.8811	29.9422	29.0492	29.8435	29.9222	29.5047	29.2915	29.7263	29.5853	29.9977	29.6658	29.714	29.862	29.5723	29.6938	29.555	29.3472	29.5246	29.4766
A0A1B0GTL5;Q9BXF6	A0A1B0GTL5;Q9BXF6	Rab11 family-interacting protein 5	RAB11FIP5	RAB11FIP5	26.2827	26.4731	25.9082	26.1207	25.9395	26.4323	25.6383	24.5725	23.5035	23.188	25.0306	22.6505	23.6521	25.4173	24.1772	26.3102	25.8468	23.5724	25.3792	25.7182	23.2643	24.2039	23.3616	25.5443	24.0303	26.1081	24.2102	25.8585	23.6813	24.9208	25.5388	23.5294	26.0449	25.3213	26.2771	25.4653	25.1227	24.01	25.9197	23.2635	23.8209	26.2103	25.6212	23.1729	25.58
A0A1B0GW68;A0A1B0GUA4;A0A1B0GTM3;Q13510;Q13510-2;E7EMM4;A0A1B0GTZ5;A0A1B0GUH5;A0A1B0GUE3;A0A1B0GUW4;A0A1B0GUG1;A0A1B0GTP7;Q13510-3;A0A1B0GVG2;A0A1B0GV06;A0A1B0GUB3;A0A1B0GU62;A0A1B0GW48;A0A1B0GVJ1;A0A1B0GVE7;A0A1B0GU06;A0A1B0GV95;A0A1B0GUJ3;A0A1B0GW66;A0A1B0GVA3;A0A1B0GV88	A0A1B0GW68;A0A1B0GUA4;A0A1B0GTM3;Q13510;Q13510-2;E7EMM4;A0A1B0GTZ5;A0A1B0GUH5;A0A1B0GUE3;A0A1B0GUW4;A0A1B0GUG1;A0A1B0GTP7;Q13510-3;A0A1B0GVG2;A0A1B0GV06;A0A1B0GUB3	Acid ceramidase;Acid ceramidase subunit alpha;Acid ceramidase subunit beta	ASAH1	ASAH1	33.3259	33.9679	33.8887	33.4567	33.5673	33.1004	33.4945	33.1233	33.334	33.9858	33.6512	33.4343	34.1436	33.6568	33.428	33.1259	33.5874	33.7894	33.4589	33.3394	33.9353	33.5159	33.729	33.2012	33.5552	33.4581	33.6518	33.5953	34.0525	33.6587	33.6981	33.9812	32.4211	34.0495	33.0678	33.7353	33.2331	33.9708	33.008	33.3018	33.2971	33.285	33.5996	33.156	33.3657
A0A1B0GTU4;P49023-2;P49023-3;A0A1B0GU60;A0A1B0GV30;F5H836;A0A1B0GWE7;REV__D6RBA6	A0A1B0GTU4;P49023-2;P49023-3;A0A1B0GU60	Paxillin	PXN	PXN	29.0401	28.3053	28.0737	28.31	27.8045	28.8461	29.0962	27.3037	28.0149	27.5969	26.8611	27.7482	27.8664	29.3239	29.0948	28.3299	29.1169	28.1976	26.1544	27.8841	28.7555	28.973	28.2949	28.4623	28.5756	28.4865	27.9521	29.0046	27.2961	28.6029	28.3471	29.0693	27.8777	29.0325	29.5971	29.0592	27.6324	28.6522	27.9205	26.682	29.0071	27.1093	29.2316	27.8252	28.2726
A0A1B0GUA3;Q96EK5;A0A0D9SFK7;A0A1B0GTE6;A0A1B0GUH6;A0A1B0GV79;A0A1B0GVY9;A0A1B0GW21;A0A1B0GU96	A0A1B0GUA3;Q96EK5	KIF1-binding protein	KIF1BP	KIF1BP	28.2348	28.8214	23.7896	30.2096	28.3274	30.1277	28.8963	23.4253	27.8647	28.1462	28.0005	27.5859	23.5576	29.3329	26.9833	27.7099	28.1725	27.3432	27.2135	26.5629	27.2963	27.1174	28.7561	29.5745	29.2379	24.0556	28.5462	23.2092	27.5891	29.2405	22.7913	29.0756	29.6003	23.7966	22.8285	27.9416	32.2531	27.3249	27.8712	28.5085	28.3242	27.2586	23.9929	23.7735	27.6091
A0A1B0GUN5;Q5VTI5;Q9Y2H5	A0A1B0GUN5;Q5VTI5;Q9Y2H5	Pleckstrin homology domain-containing family A member 6	PLEKHA6	PLEKHA6	23.512	26.6057	26.6927	27.7336	25.4795	25.9787	27.7165	24.0825	22.4656	25.8385	27.1693	26.3668	26.1929	25.8379	25.9449	24.8886	27.138	26.2265	26.6258	22.8363	24.0261	27.1059	28.7657	26.4144	26.0083	27.9722	27.1505	26.1708	28.1439	27.0464	26.8968	27.1953	28.03	27.1085	27.0124	26.8536	26.3693	25.9983	27.453	27.6063	26.4249	27.434	28.0641	27.1265	27.5577
A0A1B0GUZ7;Q14156;Q14156-3;Q14156-2;E5RJS1	A0A1B0GUZ7;Q14156;Q14156-3;Q14156-2	Protein EFR3 homolog A	EFR3A	EFR3A	24.7421	24.3485	24.7716	24.2951	23.7132	24.2052	24.9568	21.7177	23.585	26.3073	25.0109	22.3821	24.703	22.3708	23.1196	24.8016	24.3294	23.264	22.6496	22.7627	22.365	22.2217	24.7312	22.3186	24.529	25.7061	23.0734	25.3512	23.0892	23.9543	26.1322	24.4684	24.1924	25.9387	25.9916	25.5464	26.6447	22.554	23.6476	25.4721	23.112	24.4059	24.3159	24.3728	23.297
A0A1B0GV18;A0A087WVP2;Q7Z6J6-2;Q7Z6J6;H0YKW6;H0Y5N1;B5MC67	A0A1B0GV18;A0A087WVP2;Q7Z6J6-2;Q7Z6J6;H0YKW6;H0Y5N1;B5MC67	FERM domain-containing protein 5	FRMD5	FRMD5	28.1605	28.8026	28.4774	27.7009	27.8739	27.3218	28.7606	27.9291	28.3876	28.5431	28.862	28.2402	28.1614	27.0722	28.1908	27.9708	28.447	28.5037	28.4296	28.2951	28.5449	28.5627	28.3885	27.4492	27.9502	28.1457	28.1344	28.3216	28.0099	28.7225	28.3488	29.1619	27.6177	28.1558	29.303	28.1717	28.1557	28.2267	25.9712	28.1291	28.7231	28.8094	28.453	27.6244	28.0422
A0A1B0GVD5;A0A1B0GWE8;P07339;A0A1B0GW44;A0A1B0GV23;A0A1B0GVP3;A0A1B0GU92;A0A1B0GU03;C9JH19;H7C469;F8WD96;H7C1V0	A0A1B0GVD5;A0A1B0GWE8;P07339;A0A1B0GW44;A0A1B0GV23;A0A1B0GVP3;A0A1B0GU92;A0A1B0GU03;C9JH19;H7C469;F8WD96	Cathepsin D;Cathepsin D light chain;Cathepsin D heavy chain	CTSD	CTSD	34.1228	34.8297	35.0309	34.9112	34.8183	34.7092	34.7426	34.8291	34.8426	34.926	34.9781	34.9049	35.1654	34.3429	34.7516	34.7084	34.8853	34.941	35.0786	34.5135	35.32	34.4967	35.2304	34.5679	35.2053	34.7135	35.1104	34.9081	35.5062	34.7576	34.4598	35.2113	34.7921	35.1982	34.5182	34.5402	34.7424	35.6367	33.738	34.4055	34.8443	35.1493	35.6436	35.3005	34.7283
A0A1B0GVY1;Q96PU5-9;Q96PU5-4;K7ERN1;K7ENS6	A0A1B0GVY1;Q96PU5-9;Q96PU5-4	#N/A	NEDD4L	NEDD4L	24.8601	24.9228	23.3777	23.3728	23.8643	23.7483	23.506	22.8891	23.5779	24.6474	26.1073	25.9807	22.9271	24.1902	22.6175	24.2835	23.0447	25.6931	23.6133	26.1396	23.0354	24.1422	22.9074	23.0917	24.1099	24.2438	23.8853	24.5192	23.2246	25.1105	24.5871	25.1203	25.0768	23.3537	24.5483	26.172	24.1317	27.5574	25.6656	26.9883	26.8292	25.3264	25.472	23.984	23.8188
A0A1B0GW05;Q2PZI1;H7C3M5;Q2PZI1-2;H7C1I8;Q6NUT2;F5H1L7	A0A1B0GW05;Q2PZI1	Probable C-mannosyltransferase DPY19L1	DPY19L1	DPY19L1	26.0662	25.2281	22.6907	21.644	26.0026	26.1318	26.0229	24.0211	26.325	26.2857	26.2292	25.9741	26.1493	26.6621	25.4751	26.6092	26.6057	25.0106	25.8509	25.7929	26.4612	26.252	24.9823	26.0641	25.7441	26.6964	25.1224	26.1294	25.5787	26.3701	26.8138	26.7844	27.2113	25.3451	26.7077	26.4681	24.8252	26.1752	24.3756	25.6971	26.3251	23.8945	24.9495	23.9234	24.9914
A0A1B0GW50	A0A1B0GW50	#N/A	ZEB2	ZEB2	21.6865	23.4526	25.7607	22.8026	22.1936	20.6125	22.022	24.3643	22.9093	21.9186	27.1791	31.3064	23.4107	24.3771	24.1094	23.2764	26.7266	23.352	22.1515	21.3105	22.8835	30.5658	22.9387	23.1893	31.7487	31.6355	20.5537	23.6953	22.4095	24.4706	32.0356	20.95	26.4283	22.6494	27.2682	23.7337	24.6743	22.9189	23.7182	22.5805	23.5193	27.5134	30.8877	24.1499	31.7635
A0A1B0GW72;Q96PX9;Q96HN1	A0A1B0GW72;Q96PX9	Pleckstrin homology domain-containing family G member 4B	PLEKHG4B	PLEKHG4B	27.3193	26.2808	26.2969	23.4905	27.148	24.1128	27.6909	26.7349	24.5758	24.4399	27.1912	26.8391	23.3487	24.3661	26.0544	27.925	24.7625	25.2141	23.1352	26.8569	23.9441	24.6152	25.9445	23.7049	25	25.7164	25.4868	22.774	23.6758	22.5837	26.6249	26.9834	28.2546	24.3458	27.2023	26.7613	24.1143	28.775	28.5115	24.2533	24.9182	23.143	27.678	24.1045	23.7242
A0A1C7CYX9;Q16555;Q16555-2;E5RFU4	A0A1C7CYX9;Q16555;Q16555-2	Dihydropyrimidinase-related protein 2	DPYSL2	DPYSL2	33.396	33.4553	33.4144	33.524	33.4682	33.6308	33.5421	33.3395	33.1729	33.1812	33.077	33.0699	32.865	33.3679	33.0922	33.1151	33.2408	33.4567	33.6283	32.9428	33.4397	33.1627	33.4662	33.243	33.4741	33.6374	33.8583	33.5319	33.8465	33.3021	33.2089	33.6086	34.5626	33.862	33.812	33.8486	33.2953	33.4889	34.2002	33.5205	33.7052	33.2501	33.8082	33.4901	33.1092
A0A1W2PP57;A0A1W2PPC3;A0A1W2PPS0;A0A1W2PNP0;Q969N2-5;Q969N2;A0A1W2PQN1;Q969N2-4;A0A1W2PPR6;F6W983;A0A1W2PPQ7;Q969N2-2;A0A1W2PQY1;A0A1W2PRZ8;A0A1W2PR92;Q969N2-6;A0A1W2PPK4;A0A1W2PQ52;A0A1W2PP13;A0A1W2PSC5;A0A1W2PRH2;Q969N2-3;H7C2Y2;A0A1W2PPI8;A0A1W2PRG1;A0A1W2PNW9;A0A1W2PRV7;A0A1W2PRH8;A0A1W2PPU8;A0A1W2PR22;B7Z7C5;A0A1W2PP03;A0A1W2PR73;A0A1W2PNZ5;A0A1W2PNS2;A0A1W2PP98;A0A1W2PQL3;A0A1W2PR34;A0A1W2P…	A0A1W2PP57;A0A1W2PPC3;A0A1W2PPS0;A0A1W2PNP0;Q969N2-5;Q969N2;A0A1W2PQN1;Q969N2-4;A0A1W2PPR6;F6W983;A0A1W2PPQ7;Q969N2-2;A0A1W2PQY1;A0A1W2PRZ8;A0A1W2PR92;Q969N2-6	GPI transamidase component PIG-T	PIGT	PIGT	24.5973	24.2918	24.8256	26.1792	25.4968	24.957	26.5407	23.4102	25.7268	25.9588	25.6489	26.2216	22.9969	25.5538	23.9457	26.6435	25.1085	24.0963	24.6205	25.5533	25.9897	25.5931	22.1464	23.3559	25.1784	25.8667	23.9417	23.8043	22.6867	25.0764	25.1491	24.8949	24.403	23.3932	24.5342	25.7417	25.3191	24.7987	23.4012	24.0906	25.6345	24.0575	24.65	23.4656	23.2415
A0A1W2PNR9;Q9Y5U9	A0A1W2PNR9;Q9Y5U9	Immediate early response 3-interacting protein 1	IER3IP1	IER3IP1	28.4897	28.9197	27.3607	27.1266	28.0251	28.3141	28.3041	26.1768	27.5689	27.8243	27.9565	27.5526	27.1935	27.679	27.7029	27.4893	27.413	27.3224	27.4067	28.131	27.4192	28.26	27.5997	27.8518	27.8452	27.9354	27.844	27.6535	27.8927	28.1105	27.9912	28.5457	28.4808	27.5584	28.5628	28.4325	27.1961	26.9473	28.0491	28.0542	27.8261	27.9402	29.1384	28.2337	27.781
A0A1W2PNV4;E9PF58	A0A1W2PNV4;E9PF58	#N/A	ARPC1A	ARPC1A	28.6448	29.5326	29.3075	29.3409	28.7351	29.3233	29.0389	28.9985	29.5538	29.29	28.9754	29.2266	28.6323	29.2155	29.1274	29.8751	28.9603	28.9369	28.9157	28.9054	28.8675	29.1917	29.1826	28.9802	28.5909	29.1097	27.7952	28.9434	28.8066	28.9003	28.2152	29.0716	28.0765	28.1674	28.5828	28.273	26.9009	28.7026	29.9021	28.8419	28.7882	28.4584	29.0878	29.2208	29.0909
A0A1W2PNW1;P42226;P42226-3;G3V2X7;H0YJH6;G3V5I8;G3V370;H0YIY2;G3V5K5;Q5FBW6;G3V2L2;G3V2M3;G3V3E9;G3V2H4;G3V568	A0A1W2PNW1;P42226;P42226-3	Signal transducer and activator of transcription 6	STAT6	STAT6	25.1525	24.3561	23.2371	25.4641	25.1045	25.2834	23.2228	24.1766	24.5106	22.6805	25.5702	25.1059	21.7614	26.9092	23.8525	25.8928	25.6767	26.8774	23.9597	25.5527	24.4925	24.5687	24.8533	24.2922	25.2071	26.0906	26.6225	25.1503	25.4625	26.2017	25.5696	24.3752	22.9537	26.5566	25.2549	25.0173	23.5995	24.821	25.6578	25.2739	24.9327	23.5901	23.6468	22.6969	23.5938
A0A1W2PP11;Q9H300;F8WCQ4;A0A1W2PS40;C9JNP8;Q9H300-2;H7C0U0;A0A1W2PP66	A0A1W2PP11;Q9H300;F8WCQ4;A0A1W2PS40;C9JNP8;Q9H300-2;H7C0U0	Presenilins-associated rhomboid-like protein, mitochondrial;P-beta	PARL	PARL	26.1462	26.446	26.0806	26.877	25.5455	26.1098	25.8914	22.6117	23.694	27.1298	26.0266	25.0213	27.4324	25.0247	27.1583	26.1796	26.4348	25.7434	25.2728	22.82	27.2146	26.2593	23.8231	26.8852	25.5066	25.738	24.5316	24.7677	26.4955	26.1878	26.4748	27.0052	24.6439	25.0219	27.1381	26.405	23.9198	26.1608	23.9899	26.9812	25.9894	25.1695	26.465	24.716	24.2392
A0A1W2PPG5;A0A1W2PPP5;A0A1W2PPG1;A0A1W2PQM3;A0A1W2PS81;E7EQ34;I3NI02;O14653;O14653-2;A0A1W2PRV0;I3L4Z6;A0A1W2PRC2;O14653-3;A0A1W2PR23;A0A1W2PPW8;A0A1W2PR02;A0A1W2PS12;A0A1X7SBU8;A0A1W2PRL0;I3L0K1;A0A1W2PRP7;A0A1W2PQP2;I3L1K7;A0A1W2PNV3;A0A1W2PQ77;A0A1W2PRE6;A0A1W2PQ06;A0A1W2PQE0;A0A1W2PRD0;A0A1W2PQ38;A0A1W2PQQ4;A0A1W2PQ12	A0A1W2PPG5;A0A1W2PPP5;A0A1W2PPG1;A0A1W2PQM3;A0A1W2PS81;E7EQ34;I3NI02;O14653;O14653-2;A0A1W2PRV0;I3L4Z6;A0A1W2PRC2;O14653-3;A0A1W2PR23;A0A1W2PPW8;A0A1W2PR02;A0A1W2PS12;A0A1X7SBU8;A0A1W2PRL0;I3L0K1;A0A1W2PRP7;A0A1W2PQP2;I3L1K7;A0A1W2PNV3;A0A1W2PQ77;A0A1W2PRE6;A0A1W2PQ06;A0A1W2PQE0	Golgi SNAP receptor complex member 2	GOSR2	GOSR2	26.7543	27.2532	27.7954	26.4186	27.1647	28.2925	27.2109	24.2175	28.8953	27.3183	25.7397	27.2163	28.4868	29.5471	27.8946	27.5147	25.5294	27.0541	23.1246	28.7887	28.2017	27.154	29.7842	27.7778	26.4585	26.6468	26.7423	28.3252	29.5087	27.5981	24.1269	26.6255	27.8742	26.0665	24.2353	23.993	24.0429	29.2463	26.9527	28.4573	28.4091	28.2577	26.2866	23.969	26.7277
A0A1X7SBZ2;A0A1W2PQ51;Q92841;Q92841-1;Q92841-3;Q92841-2;A0A0U1RQJ0	A0A1X7SBZ2;A0A1W2PQ51;Q92841;Q92841-1;Q92841-3;Q92841-2	Probable ATP-dependent RNA helicase DDX17	DDX17	DDX17	29.8637	29.3951	29.51	29.5193	29.6583	29.5612	29.1482	30.0589	29.3417	29.7206	28.9549	29.5206	29.7719	30.1838	29.9959	30.1939	30.3693	29.6976	29.7826	29.1007	29.9168	29.8119	29.4543	29.5055	29.6579	29.8166	29.6442	29.486	30.0688	30.1223	29.7273	29.8257	30.4655	30.3638	30.0921	30.1044	28.9806	29.6011	29.586	29.8978	29.7315	29.8104	29.556	29.5766	29.312
A0A1W2PQS6;F6U211;A0A2R8Y7H1;S4R435;A0A2R8YFH6;A0A2R8Y6L3	A0A1W2PQS6;F6U211;A0A2R8Y7H1;S4R435;A0A2R8YFH6;A0A2R8Y6L3	#N/A	RPS10-NUDT3	RPS10-NUDT3	29.3194	29.5488	29.6231	29.6361	29.9832	29.8073	30.1372	30.5081	29.8688	30.3532	30.5531	30.1538	30.4571	30.7183	30.4393	30.6672	30.0029	29.8088	29.812	30.3591	30.6513	30.1553	29.8412	30.407	29.93	29.7556	30.4029	30.4109	29.9064	30.427	29.5635	29.5781	29.7979	29.5302	29.9661	30.0589	30.297	30.2511	29.6936	30.2616	30.22	29.2324	29.538	29.1051	29.4433
A0A1W2PS24;Q5SRN5;P04439;Q5SRN7	A0A1W2PS24;Q5SRN5;P04439;Q5SRN7	HLA class I histocompatibility antigen, A-3 alpha chain	HLA-A	HLA-A	29.5684	27.792	29.0112	23.9701	26.8304	27.6398	27.9197	27.58	27.6572	28.1503	28.0811	28.0464	24.4157	27.9575	28.5834	24.856	28.2634	28.1487	28.0895	27.6912	29.1536	28.4569	28.6311	27.8939	24.4867	26.6906	28.9043	28.4268	26.1732	26.8311	28.4262	28.3302	26.9189	29.3644	23.8197	29.2295	27.6196	28.3619	29.1341	28.3662	26.9622	26.1225	23.9948	27.9356	28.2932
A0A1W2PS43;Q14108;A0A1W2PQR6;A0A1W2PQB7;A0A1W2PRS1;A0A1W2PPX5;A0A1W2PPU6;A0A1W2PRF6;Q14108-2;A0A1W2PSE4;A0A1W2PQL5;D6RDG0;A0A1W2PS70;A0A1W2PNX7;A0A1W2PPX6	A0A1W2PS43;Q14108;A0A1W2PQR6;A0A1W2PQB7;A0A1W2PRS1;A0A1W2PPX5;A0A1W2PPU6;A0A1W2PRF6;Q14108-2	Lysosome membrane protein 2	SCARB2	SCARB2	29.9896	29.5485	29.9028	30.279	30.1778	29.6307	29.3958	30.003	29.5597	30.5639	30.1688	29.9776	30.1612	29.9781	30.3087	30.2782	29.5979	30.0477	30.2356	29.7332	30.3685	29.2276	30.1882	30.5016	29.9683	30.2172	30.4967	30.0321	30.0287	30.1197	29.5865	30.2813	29.5796	30.4586	29.6161	29.9535	28.8862	30.1966	30.2729	30.7196	29.6098	29.9712	30.366	29.6316	28.7491
A0A286YF22;O43175;A0A2C9F2M7;A0A286YFL2;A0A286YFA2;A0A286YFM8;A0A286YF78;A0A286YFE1;A0A286YER3;A0A286YFC8;A0A286YFB2;A0A286YF34;A0A286YFF3;A0A286YFK5	A0A286YF22;O43175;A0A2C9F2M7;A0A286YFL2;A0A286YFA2	D-3-phosphoglycerate dehydrogenase	PHGDH	PHGDH	28.1981	25.8167	27.9525	27.0005	27.6747	28.1851	24.9977	26.7487	28.9679	27.9366	27.5973	27.8295	27.1902	28.5454	27.7554	29.2392	26.9956	26.748	28.1204	27.6077	28.9212	28.12	27.1356	27.9825	27.367	29.5874	27.8448	29.543	28.0559	27.0311	27.0504	28.0188	28.9768	28.9509	29.5369	29.204	26.1405	26.1166	29.3113	28.1436	29.2548	26.9025	22.96	27.0985	27.1212
A0A2C9F2P4;A0A286YFF7;P50897;Q5T0S4;A0A286YFE3;A0A286YFL8;P50897-2;E9PK48;A0A286YFL6	A0A2C9F2P4;A0A286YFF7;P50897;Q5T0S4;A0A286YFE3;A0A286YFL8;P50897-2	Palmitoyl-protein thioesterase 1	PPT1	PPT1	29.2537	30.7021	29.6948	30.2994	30.4834	29.5071	29.6557	29.5634	29.4604	29.7346	29.8329	30.2613	30.0928	29.2621	29.4916	30.0518	29.7114	30.5019	30.4245	29.4915	30.3957	28.9197	29.3172	29.5192	30.0762	30.3051	30.0816	29.615	30.7573	29.5497	29.6894	30.4217	30.1567	31.0331	29.798	29.6651	28.9105	30.4825	29.2286	29.7281	29.4319	28.6578	29.3923	29.3845	28.6462
A0A2Q2TTZ9;P01594;P01593	A0A2Q2TTZ9;P01594;P01593	Ig kappa chain V-I region AU;Ig kappa chain V-I region AG	IGKV1D-33	IGKV1D-33	29.8206	29.0502	29.7092	29.6583	29.8387	29.246	29.1008	30.288	28.3535	27.3383	27.8406	29.3911	29.0475	29.7433	29.5822	29.2364	26.3883	28.744	29.6118	29.6348	29.1297	28.792	29.8494	29.3831	30.2191	31.3377	29.9389	31.2966	30.6951	28.8951	30.2451	29.096	32.1427	31.1346	30.1544	31.3474	29.0373	29.2805	31.9642	30.8069	31.1419	30.6693	27.8143	29.8191	30.2468
A0A2Q3DP09;Q7Z3E5-2;Q7Z3E5;H7C2P6;C9JW07;H7C3U7;H7BZY2	A0A2Q3DP09;Q7Z3E5-2;Q7Z3E5	LisH domain-containing protein ARMC9	ARMC9	ARMC9	26.9181	27.1349	23.1254	26.8007	26.6903	23.7405	27.1761	23.7819	26.0764	22.4512	26.0522	25.5231	24.3689	25.831	26.8131	24.1929	24.2622	22.5163	23.0709	24.6544	24.452	23.2273	23.8009	24.2533	23.6696	24.1081	22.8805	23.3381	25.0246	26.5242	22.6812	27.1393	24.5542	24.3604	23.7667	22.9849	25.3901	25.4858	24.7041	25.4888	22.4679	26.5389	23.891	23.7245	25.6769
A6NNI4;A0A2R8Y478;G8JLH6;P21926;A0A087WU13	A6NNI4;A0A2R8Y478;G8JLH6;P21926	Tetraspanin;CD9 antigen	CD9	CD9	27.4823	24.527	26.7703	29.3858	28.6726	27.3694	23.5741	27.2759	28.6067	28.4703	27.6527	23.3119	24.0045	27.0672	26.7432	27.5549	27.9828	28.9044	28.7857	27.5213	27.1	26.6725	28.6994	26.6491	27.6944	29.1434	27.8617	28.8321	28.0207	28.2279	26.9813	28.8911	30.5315	27.9104	29.2226	29.1153	27.2641	23.5046	28.5868	26.8943	28.0494	27.2825	27.4617	24.0744	22.1695
A0A2R8Y4H2;B1AHR1;Q9UH03-2;Q9UH03	A0A2R8Y4H2;B1AHR1;Q9UH03-2;Q9UH03	Neuronal-specific septin-3	SEPT3	SEPT3	27.7771	28.4716	27.3435	28.608	28.7575	28.9087	28.4117	27.1331	28.0973	28.051	28.8399	28.3029	28.0429	28.2592	27.1803	27.5411	26.6147	27.1453	27.8112	27.8575	27.7389	27.1519	27.8955	27.705	27.5711	28.1626	27.8193	28.1344	28.5641	28.2999	28.036	27.9243	25.6317	28.4808	28.4633	29.0028	27.3126	28.5398	29.0789	28.8239	28.5788	25.1613	27.4205	26.8392	28.1873
A0A2R8Y4I8;Q9UBP0-4;Q9UBP0-2;A0A2R8YGN6;A0A2U3TZR0;Q9UBP0-3;Q9UBP0;A0A2R8Y481;A0A2R8YFW8;A0A2R8YCL5;A0A2R8Y7K2;A0A2R8YFC9;A0A2R8Y5N9;A0A2R8Y5I6;A0A2R8Y7W6;A0A2R8YEA0	A0A2R8Y4I8;Q9UBP0-4;Q9UBP0-2;A0A2R8YGN6;A0A2U3TZR0;Q9UBP0-3;Q9UBP0;A0A2R8Y481;A0A2R8YFW8;A0A2R8YCL5;A0A2R8Y7K2	Spastin	SPAST	SPAST	24.817	23.1852	22.0871	28.8457	28.4916	23.8694	25.9599	25.269	23.3269	25.0167	28.2078	28.0104	26.0186	29.0773	27.6103	28.3787	27.479	28.0021	27.8382	29.2143	28.8368	27.9807	23.5818	22.4078	28.8715	28.55	24.1946	23.7376	29.2814	23.1138	22.1995	24.2003	25.7656	24.699	28.6109	24.6623	28.4827	28.6837	29.8804	27.0948	28.66	28.3494	28.7951	24.715	26.56
A0A2R8Y4J4;Q9NWS8;A0A087WXU0;Q5SZ82;Q9NWS8-2;A0A2R8Y4P5;A0A2R8YFC3;Q9NWS8-3	A0A2R8Y4J4;Q9NWS8;A0A087WXU0;Q5SZ82;Q9NWS8-2	Required for meiotic nuclear division protein 1 homolog	RMND1	RMND1	27.4989	26.3281	24.2608	24.844	23.7557	26.9876	27.4876	27.353	27.8263	27.4936	26.8585	26.0484	22.1562	24.6823	27.6562	27.1653	27.4348	24.1883	25.6407	23.2988	28.3287	27.806	27.7547	25.2555	27.7382	27.7657	26.7863	22.1236	27.1105	26.4454	27.2753	27.3336	27.5171	27.3557	27.7154	26.2428	24.5972	28.1017	28.6189	28.9764	27.2788	26.3363	26.9469	22.7999	26.7684
A0A2R8Y4T1;E9PGF5;A0A087WWW7;H0Y4U1;E7ERH1;E7EMG1;Q9HBL0-2;H7C3Z4;C9JI43;C9J8K5;C9JFT7;C9JZT0	A0A2R8Y4T1;E9PGF5;A0A087WWW7;H0Y4U1	#N/A	TNS1	TNS1	33.0901	32.9747	32.9232	32.7833	32.8142	33.0535	32.6461	32.5572	32.4727	32.6352	32.3354	32.7036	32.0801	32.2329	32.4331	32.2495	33.3602	32.7524	33.1388	32.4688	32.7674	32.7597	32.6443	32.5136	33.2973	33.1996	33.2311	33.0028	33.6163	33.2759	33.3597	33.4243	33.6525	33.7446	33.565	33.1504	32.892	33.1811	33.3897	33.2013	33.6157	33.3889	33.0462	32.8862	32.9378
A0A2R8Y4Y7;Q9UQ90;A0A2R8Y7B8;A0A2R8YFW4;A0A2U3TZH1;A0A2R8YDQ1;A0A2R8Y726;A0A2R8Y3M4;A0A2R8Y6K2;A0A2R8Y7E2;A0A2R8YGZ0;A0A2R8Y6E8;A0A2R8YFJ7;A0A2R8YG79;A0A2R8Y4M0;A0A2R8YFF4;A0A2R8Y632;A0A2R8Y729;Q9UQ90-2;A0A2R8Y7N2;A0A2R8YEH4;A0A2R8Y4M8;A0A2R8Y6Z7;A0A2R8YFN9;A0A2R8Y4Z7;H3BTY6;A0A2R8Y4L7;A0A2R8YGV4;A0A2R8Y4L0;A0A2R8Y617;H3BTR8;H3BMP1;A0A2R8YFQ9;H3BNE4;A0A2R8Y856;A0A2R8YDW8;A0A087X0F5	A0A2R8Y4Y7;Q9UQ90;A0A2R8Y7B8;A0A2R8YFW4;A0A2U3TZH1;A0A2R8YDQ1;A0A2R8Y726;A0A2R8Y3M4;A0A2R8Y6K2;A0A2R8Y7E2;A0A2R8YGZ0;A0A2R8Y6E8;A0A2R8YFJ7	Paraplegin	SPG7	SPG7	29.9394	30.1966	30.1316	29.6725	29.3158	29.798	30.3277	30.1708	30.6559	30.4607	30.5136	30.4161	30.5526	30.3147	30.3024	30.4807	31.1864	30.6568	30.6662	30.3395	30.9539	30.9193	30.7557	30.5242	29.9833	30.891	30.5138	30.3566	30.1432	30.6922	30.9848	30.8259	29.8482	30.5015	30.2692	30.5949	30.154	30.779	28.3361	30.3113	30.4319	29.824	29.3825	29.6619	30.0296
A0A2R8Y504;O43556-4;A0A2R8Y821;A0A2R8Y5P8;A0A2R8Y4X1;A0A2R8Y4E3;A0A2R8Y5X5;B7Z2R4;A0A2R8YGQ3;A0A2R8Y5R7;A0A2R8YE48;O43556;A0A2R8Y6Y5;A0A2R8Y6G8;A0A2R8Y5H7;A0A2R8YE16;A0A2R8Y628;C9JR67;A0A2R8Y6V3;A0A2R8Y621;A0A2R8Y7J1;A0A2R8YH84;A0A2R8Y5J3;A0A2R8Y4P8;A0A2R8Y652;A0A2R8Y5J6;A0A2R8Y5X0;A0A2R8Y638;A0A2R8Y5M2;O43556-3;E9PEH6;A0A2R8Y416;A0A2U3TZN7;A0A2R8Y2R1;A0A2R8Y5Q3;A0A2R8Y6U6;A0A2R8YEY2;A0A2R8YFA5;A…	A0A2R8Y504;O43556-4;A0A2R8Y821;A0A2R8Y5P8;A0A2R8Y4X1;A0A2R8Y4E3;A0A2R8Y5X5;B7Z2R4;A0A2R8YGQ3;A0A2R8Y5R7;A0A2R8YE48;O43556;A0A2R8Y6Y5;A0A2R8Y6G8;A0A2R8Y5H7;A0A2R8YE16;A0A2R8Y628;C9JR67;A0A2R8Y6V3;A0A2R8Y621;A0A2R8Y7J1;A0A2R8YH84;A0A2R8Y5J3;A0A2R8Y4P8;A0A2R8Y652;A0A2R8Y5J6;A0A2R8Y5X0;A0A2R8Y638;A0A2R8Y5M2;O43556-3;E9PEH6;A0A2R8Y416;A0A2U3TZN7;A0A2R8Y2R1;A0A2R8Y5Q3;A0A2R8Y6U6;A0A2R8YEY2;A0A2R8YFA5;A…	Epsilon-sarcoglycan	SGCE	SGCE	28.531	28.4013	28.2089	29.6858	29.6398	29.3752	28.4026	28.6777	27.3693	29.248	29.1794	28.9697	28.8126	28.6547	27.9406	28.136	29.0947	28.9601	27.6889	28.848	28.4225	28.8332	27.4097	28.9444	29.8673	29.053	29.5212	29.0171	28.6639	27.9204	29.1311	28.443	29.7372	29.6625	28.7001	30.5012	31.5034	28.3758	30.0514	29.5947	29.4231	28.1827	28.0506	28.4345	28.3658
A0A2R8Y566;Q9P260-2;A0A075B768	A0A2R8Y566;Q9P260-2	LisH domain and HEAT repeat-containing protein KIAA1468	RELCH	RELCH	24.967	26.2946	25.6029	24.0733	23.9023	25.4349	25.7907	25.9016	26.4054	22.5107	25.0845	25.3161	25.2595	26.0355	24.2525	22.7966	26.5161	26.7086	25.6529	22.62	26.5125	26.49	25.8762	26.3766	26.2384	26.7622	26.8143	25.0494	26.2974	25.8627	26.1292	23.6534	26.7562	26.0682	25.9544	25.2987	24.0895	25.5733	26.9333	24.4267	25.8367	25.152	26.9917	23.9952	25.6231
A0A2R8Y5N2;Q92574;A0A2R8YFV7;A0A2R8Y5S3;Q92574-2;A0A2R8Y6S1;Q59IT9;A0A2R8YEH9;Q86WV8;A0A2R8Y7E9;A0A2R8Y6W1;A0A2R8YGX7;A0A2R8YD74;A0A2R8Y5M3;A0A2R8YGL0;A0A2R8Y5F8;A0A2R8Y5U8;A0A2R8Y6S8;A0A2R8Y5J1;A0A2R8Y5Q4;A0A2R8Y6N1;A0A2R8Y419;A0A2R8Y756	A0A2R8Y5N2;Q92574;A0A2R8YFV7;A0A2R8Y5S3;Q92574-2;A0A2R8Y6S1	Hamartin	TSC1	TSC1	29.0025	27.7322	23.62	24.1289	28.7549	27.8968	26.9622	23.1207	29.9011	27.0452	27.9912	23.7855	29.5899	28.6215	29.2452	28.5074	28.2257	29.0086	28.8753	29.9541	28.1491	29.2119	30.128	28.6184	22.229	28.7405	28.9149	28.9066	27.0499	26.8151	26.8495	27.1725	30.0152	29.1739	27.4669	29.9245	23.3562	22.0299	31.7918	27.7133	28.9013	29.1964	27.0473	30.7287	30.3829
A0A2R8Y5P7;P49590;A0A2R8Y3N3;P49590-2;A0A2R8Y6I1;D6RB22;B4DQ67;D6RJE6;A0A2R8Y5E8;A0A2R8Y4X6	A0A2R8Y5P7;P49590;A0A2R8Y3N3;P49590-2;A0A2R8Y6I1;D6RB22;B4DQ67;D6RJE6	Probable histidine--tRNA ligase, mitochondrial	HARS2	HARS2	28.9105	29.3323	29.1199	28.6449	28.6532	29.1194	29.3037	28.9736	29.626	29.0518	29.2895	28.6982	29.5735	29.7738	29.8502	28.7561	28.9212	29.4269	29.1636	28.7968	29.9787	28.8479	28.7448	29.8465	29.377	29.2754	29.4518	29.3453	29.467	29.5025	29.606	29.2075	29.2969	29.5064	28.8224	29.0704	26.7366	30.0293	28.4259	28.3846	29.5559	28.0695	28.4163	28.7351	28.6819
A0A2R8Y5V9;A0A2R8YGX3;A0A2R8YH90;K7EP68;K7EMU5;A0A2R8YHD2;K7EPV9	A0A2R8Y5V9;A0A2R8YGX3;A0A2R8YH90	#N/A	TPM4	TPM4	35.6472	35.1628	35.3307	36.1169	35.6131	35.6259	35.5596	35.9107	35.2261	35.2724	35.4889	35.3585	35.0833	36.1385	35.2784	35.722	35.2705	35.4966	35.4194	34.858	35.5492	35.0303	35.8145	35.3667	34.9641	35.2469	35.401	35.209	35.5746	35.4285	35.3146	35.3912	36.3721	35.188	35.7656	35.2019	34.8219	35.0952	34.2329	35.1736	35.3986	34.9299	35.1707	35.4651	35.3982
A0A2R8Y6G6;A0A2R8Y798;A0A2R8YEG5	A0A2R8Y6G6	#N/A	ENO1	ENO1	27.8635	27.6104	28.6898	27.0285	28.4948	27.3359	28.8257	27.5554	29.1294	28.3842	28.7357	27.9833	28.1105	27.9716	24.6975	26.91	29.0815	28.1149	28.6072	28.33	28.6407	29.4589	28.9765	28.2113	27.7263	28.6177	28.4183	28.1081	27.2738	23.3628	28.7096	27.9801	23.002	28.7311	28.362	28.7771	28.3245	27.194	28.5467	27.1141	28.7035	29.7316	29.1611	28.7174	28.8017
A0A2R8Y7X9;P69891;A0A0J9YYA3	A0A2R8Y7X9;P69891	Hemoglobin subunit gamma-1	HBG1	HBG1	26.9059	27.7539	25.817	30.6673	29.134	24.3238	29.941	28.3151	29.1894	25.7728	24.8899	27.2262	24.4007	26.4294	25.3688	26.1627	24.8711	24.7769	26.721	25.6668	23.3978	29.305	27.3694	22.981	27.9271	26.283	28.9389	29.4536	31.7312	26.1331	27.8384	25.0488	30.0461	28.5185	28.0285	26.3455	33.6033	29.0799	33.217	27.7199	30.2433	32.2231	27.6057	31.5846	30.6254
A0A2R8Y851;P62273;P62273-2;A0A2R8Y6P7;A0A087WTT6	A0A2R8Y851;P62273;P62273-2;A0A2R8Y6P7;A0A087WTT6	40S ribosomal protein S29	RPS29	RPS29	27.4633	27.2623	26.2982	27.3819	26.1312	26.7669	25.3784	26.5079	26.2856	26.578	26.9987	27.2732	26.4996	26.7752	26.7155	28.0236	26.6922	27.0787	26.278	27.9084	25.8151	27.531	24.9267	27.1917	27.1459	25.852	27.2082	25.7628	26.6213	26.8204	25.5184	26.0603	24.4485	25.2654	24.9512	25.8681	25.2189	26.6934	27.2351	25.9811	26.6153	22.8531	23.7811	25.5654	22.8551
A0A2R8YCJ8;Q9NVV5-3;Q9NVV5-2;Q9NVV5;Q5T2H3;Q9NVV5-4;Q5THU2;Q5T2H0;Q5T2H4;Q9NVV5-6;Q9NVV5-5	A0A2R8YCJ8;Q9NVV5-3;Q9NVV5-2;Q9NVV5;Q5T2H3;Q9NVV5-4;Q5THU2;Q5T2H0;Q5T2H4;Q9NVV5-6;Q9NVV5-5	Androgen-induced gene 1 protein	AIG1	AIG1	28.1122	27.9251	26.8933	26.983	27.2246	27.2517	28.2202	29.2178	27.7849	29.0301	28.3433	27.586	25.4037	22.1032	27.2228	27.7244	25.6058	26.6946	25.4904	25.9036	24.38	25.859	24.4183	25.3715	26.5288	26.8706	25.2466	27.1375	25.0817	27.6028	26.873	27.9028	23.3321	26.0672	27.4809	25.1106	25.4393	25.5714	24.0307	24.041	23.8554	24.5014	27.0001	25.5738	26.6792
A0A2R8YCY2	A0A2R8YCY2	#N/A	FRY	FRY	29.399	29.4379	28.9941	28.3873	29.3641	30.8312	29.9642	30.1718	23.5366	29.6126	27.6033	28.16	30.6131	29.3376	29.1803	23.8403	29.7814	29.6845	29.6347	30.5994	29.6971	30.5989	30.1646	29.0795	30.2317	29.7441	29.2541	29.8354	29.7285	29.8529	29.3205	29.7855	29.9276	29.1973	29.9628	29.7349	30.7124	27.8613	28.2427	29.6884	29.0071	29.7113	30.319	32.458	29.7058
A0A2R8YD58;E7EU96;P68400;A0A2R8Y5A0;A0A2R8YDP2;A0A2R8YF43;A0A2R8YFU2;A0A2R8Y4D6;A0A2R8Y4H0;P68400-2;V9GYA2;A0A2R8YEW1;A0A2R8YDY7;A0A2R8YCK2;A0A2R8Y3W6;A0A2R8Y797;V9GY80;A0A2R8YF47;A0A2R8Y7T1;A0A087WY74;A0A2R8YCC9;V9GYW6;REV__E7EP72	A0A2R8YD58;E7EU96;P68400;A0A2R8Y5A0;A0A2R8YDP2;A0A2R8YF43;A0A2R8YFU2;A0A2R8Y4D6;A0A2R8Y4H0;P68400-2	Casein kinase II subunit alpha	CSNK2A1	CSNK2A1	30.2064	30.6522	30.3712	30.5446	30.3946	30.4428	30.6199	30.402	30.3236	30.6568	30.3988	30.4438	29.8388	30.8886	30.355	30.7223	30.9425	30.2768	30.063	30.5206	30.6419	30.5069	30.4245	30.3466	30.6425	30.7529	30.083	30.418	30.6943	30.9699	30.4223	30.4613	29.5521	30.4852	30.5195	30.5912	29.2364	30.0866	30.1418	30.0804	30.2015	30.2742	30.537	30.1647	30.4447
A0A2R8YDQ9;Q5T9Q5;A0A0U1RRI1;A0A0U1RQL1	A0A2R8YDQ9;Q5T9Q5	#N/A	SUCLA2	SUCLA2	34.5089	34.0182	34.3257	33.9998	33.9076	34.3642	34.263	34.6581	34.714	34.6353	34.6356	34.624	34.701	33.9096	34.2449	34.6844	34.3081	34.4806	34.3865	34.4269	34.6158	34.3816	34.4128	34.2598	34.4382	34.0746	34.5029	34.3496	34.5597	34.7333	34.5775	34.8252	34.0156	34.279	34.0833	34.1063	33.8065	34.6801	33.8932	34.32	34.6252	34.2014	34.388	34.2271	34.0967
A0A2R8YG42;Q14155-5;Q14155-3;Q14155;F6SJA5	A0A2R8YG42;Q14155-5;Q14155-3;Q14155	Rho guanine nucleotide exchange factor 7	ARHGEF7	ARHGEF7	27.4734	28.4389	27.9666	28.0328	27.9649	28.3357	28.1388	27.6429	27.8572	28.8787	26.5786	27.8815	27.9483	28.2688	28.0314	27.8809	27.9988	27.1663	28.044	28.5401	28.9784	28.418	28.199	27.9358	27.7408	27.2481	28.8486	29.0894	28.4019	28.2213	22.8728	28.5555	28.3745	27.4201	28.0254	28.475	27.5975	27.5118	28.6049	27.7708	28.3038	24.499	28.6998	21.9285	28.349
A0A2U3TZH3;Q05639;A0A2R8Y488;A0A2R8Y660;A0A2R8YDN5	A0A2U3TZH3;Q05639	Elongation factor 1-alpha 2	EEF1A2	EEF1A2	36.0524	36.2005	36.4595	36.0742	36.1847	35.9951	36.149	35.9167	36.0325	35.9165	35.8418	35.9006	35.8642	36.3172	36.1904	35.6296	36.0528	35.685	35.9275	35.8555	36.0965	36.1716	35.9911	36.2238	35.9159	36.0387	35.9463	35.7749	35.6654	35.9899	36.0155	35.8365	34.7798	35.9418	35.3342	35.9928	35.7684	35.9224	35.6141	36.038	35.8082	35.7067	35.6932	35.6563	36.0354
E9PNW4;A0A2U3TZL5;E9PR17;P13987;H0YET2;E9PI80	E9PNW4;A0A2U3TZL5;E9PR17;P13987	CD59 glycoprotein	CD59	CD59	27.2395	25.6381	28.8989	28.6001	28.4716	28.3302	28.4232	28.6679	29.366	29.3647	29.2618	29.2796	29.767	29.6245	28.7708	29.3282	29.0275	29.7648	29.7778	29.2395	29.0691	29.7647	29.6811	29.7663	28.3112	27.7011	29.4404	28.5299	26.8818	24.484	27.5815	23.8987	29.3448	29.685	28.299	28.0935	29.7087	30.1904	29.6546	29.3076	29.4303	28.0644	27.004	29.1248	26.6251
A0A2U3TZV9;Q3V6T2;Q3V6T2-5;Q3V6T2-2;Q3V6T2-3;A0A2R8Y4X4;A0A2R8YG73;Q3V6T2-4;A0A2R8Y4W8;A0A2R8Y7B1;A0A2R8YGU1;A0A2R8YG52;A0A2R8Y820;A0A087WXD9;A0A2R8Y885;A0A2R8Y7D4;A0A2R8YDS8;A0A2R8Y6B2;A0A2R8Y7D9;H0Y7U8;H0Y470;A0A2R8YD81;A0A2R8Y802;A0A2R8Y846;A0A2R8Y7L3;A0A2R8YD99	A0A2U3TZV9;Q3V6T2;Q3V6T2-5;Q3V6T2-2;Q3V6T2-3;A0A2R8Y4X4;A0A2R8YG73;Q3V6T2-4;A0A2R8Y4W8;A0A2R8Y7B1;A0A2R8YGU1;A0A2R8YG52;A0A2R8Y820;A0A087WXD9	Girdin	CCDC88A	CCDC88A	24.3957	23.5343	30.282	29.8072	25.9514	26.9897	27.763	29.0983	22.7677	22.2937	25.2712	23.592	24.2067	23.5715	28.5829	20.6441	19.6429	31.6264	22.5999	21.0149	19.8419	20.2259	31.1059	23.0556	29.9983	30.0589	31.0863	30.3258	24.7648	27.6694	24.5889	26.1086	20.9219	21.8227	22.6075	22.7198	32.3968	23.1771	24.2057	23.8335	23.375	30.3606	31.147	30.7444	31.1316
A0A384DVU0;Q8IY17-2;Q8IY17-3;Q8IY17;Q8IY17-5;M0R2C2;M0QYT1;M0R2K2;M0QYF5;M0QZK5;M0R2H4;M0QXH7;A0A2R8Y7E1	A0A384DVU0;Q8IY17-2;Q8IY17-3;Q8IY17;Q8IY17-5	Neuropathy target esterase	PNPLA6	PNPLA6	22.1789	25.3126	23.9632	23.076	25.1296	23.1106	25.5717	24.801	25.8056	24.6094	26.6628	25.6028	22.7535	24.6401	24.8484	26.2219	23.6007	24.6004	25.1195	25.0128	25.5039	25.6465	23.0322	24.9716	26.8653	25.9137	22.54	26.1668	25.8079	25.7992	25.7928	25.8042	25.521	26.0456	25.4672	25.7573	24.5647	26.7729	25.275	25.4959	26.0485	23.9569	24.0269	23.5736	24.8745
A0A3B3IPE9;Q6ZSZ5-1;A0A087WZG4;Q6ZSZ5-2;Q6ZSZ5-6;Q6ZSZ5-5;Q6ZSZ5;M0QZS0	A0A3B3IPE9;Q6ZSZ5-1;A0A087WZG4;Q6ZSZ5-2;Q6ZSZ5-6;Q6ZSZ5-5;Q6ZSZ5;M0QZS0	Rho guanine nucleotide exchange factor 18	ARHGEF18	ARHGEF18	26.2403	26.1225	27.0496	26.246	26.4853	26.4573	24.8631	25.4215	25.6977	23.0447	25.4456	23.8808	24.0318	24.0802	25.021	22.9821	24.2923	23.9573	23.9671	23.919	23.7991	23.7069	24.0705	24.292	22.543	24.3338	22.9549	26.1953	26.9947	25.6937	26.1978	23.2317	22.9902	23.512	27.5573	26.0423	23.7988	25.0521	24.6812	24.0683	23.3633	26.426	26.7804	24.3631	26.7808
A0A3B3IRL2;O75629	A0A3B3IRL2;O75629	Protein CREG1	CREG1	CREG1	26.5928	27.8959	26.0617	28.0202	26.4835	26.053	26.2993	26.805	27.4465	26.3772	27.0238	29.5326	23.7805	27.0894	26.4071	27.3066	25.7894	26.5806	26.3271	28.3163	27.0498	26.6587	25.4008	27.9621	25.5824	25.1967	26.4327	22.94	23.8334	27.1071	27.1015	27.6284	24.3478	25.9633	25.1587	23.0018	26.34	25.2391	27.224	26.4143	23.5024	24.0219	24.3823	24.3797	23.893
A0A3B3IRN5;Q06828	A0A3B3IRN5;Q06828	Fibromodulin	FMOD	FMOD	20.9094	32.1595	22.0593	32.6126	30.0895	30.6323	30.295	23.8359	24.3002	27.3057	22.7616	23.8939	28.7765	28.1096	23.3056	24.0833	24.1289	24.8269	21.2356	23.451	23.0494	25.4118	28.6586	22.4269	27.8217	26.3766	26.7734	29.3999	27.3406	22.1784	23.6772	21.8897	28.8677	22.4653	27.2408	30.332	23.5867	23.2788	31.9597	25.4527	26.3074	25.8907	30.4512	28.1408	28.8544
A0A3B3IRT8;P43307;C9J3L8;C9J5W0;E9PAL7;C9IZQ1;P43307-2;C9JBX5	A0A3B3IRT8;P43307;C9J3L8;C9J5W0;E9PAL7;C9IZQ1;P43307-2	Translocon-associated protein subunit alpha	SSR1	SSR1	27.6244	27.9681	26.8749	27.7525	27.5514	27.7033	26.9375	27.6649	27.4342	28.0429	27.2999	27.348	27.5379	28.8567	28.4905	29.4344	27.5064	27.6172	27.5606	28.0783	28.0355	27.323	27.6303	28.3068	27.3967	27.661	27.3899	27.6174	27.2726	27.5765	27.6872	27.6179	27.7727	27.5557	27.755	27.7137	26.1482	27.2811	25.0837	27.2278	27.4616	27.4026	26.5059	26.1378	27.0041
A0A3B3ISG5;P14735;P14735-2	A0A3B3ISG5;P14735	Insulin-degrading enzyme	IDE	IDE	29.2386	29.2086	29.1596	29.4558	29.7257	29.4287	29.597	29.4254	29.814	29.5361	29.4707	29.421	29.3764	29.6906	29.6133	29.3705	29.6744	29.694	29.6121	29.3815	30.053	30.0238	29.6316	29.3546	29.8742	29.3095	29.7349	29.7814	30.0831	29.4323	29.7471	29.5569	29.623	29.2699	30.1657	29.8064	29.8016	29.2574	29.2619	29.6506	29.5933	29.4103	29.6578	29.0302	29.2316
A0A3B3ISR2;B4DPQ0;F5H2D0;P00736;A0A3B3ITU4;F5H1V0;F5H6Y3;F5H3N3;F5H3A3	A0A3B3ISR2;B4DPQ0;F5H2D0;P00736;A0A3B3ITU4	Complement C1r subcomponent;Complement C1r subcomponent heavy chain;Complement C1r subcomponent light chain	C1R	C1R	26.3374	24.5204	25.0915	28.2964	27.4426	25.8818	25.8898	25.4763	26.8921	23.0809	25.8155	28.9684	25.6849	23.6407	24.9494	27.272	27.5014	25.1171	22.7008	28.0538	24.3487	25.9706	27.3286	24.8377	27.5286	30.1845	27.9549	27.6707	28.1403	23.7563	26.7145	25.4446	31.1421	27.808	29.0245	29.0906	27.0972	26.0273	30.5499	27.47	24.9606	27.2507	23.6192	27.8974	24.0894
A0A3B3ISS6;Q14956-2;Q14956;Q96F58	A0A3B3ISS6;Q14956-2;Q14956	Transmembrane glycoprotein NMB	GPNMB	GPNMB	31.0456	32.0008	31.39	30.5506	31.0797	31.5304	31.6643	31.3652	31.018	31.9273	31.6376	32.3137	32.3698	31.2704	31.1234	30.7874	31.7446	31.1271	31.3637	31.3744	30.873	31.4783	31.3717	31.3287	30.6724	31.333	32.269	32.016	31.7615	30.2038	31.3305	31.5093	29.6627	32.48	31.2656	31.0506	30.5537	31.4223	30.1866	31.5888	31.5477	29.8624	29.2213	30.3551	31.0572
A0A3B3ISU0;Q02487	A0A3B3ISU0;Q02487	Desmocollin-2	DSC2	DSC2	28.8919	28.7841	28.9308	29.513	28.6278	29.2125	28.7728	29.3393	28.8027	28.2166	28.6097	28.9707	28.1539	28.5343	29.1612	28.5464	29.4033	28.1943	29.5607	28.4321	28.2971	29.469	28.6989	27.5651	29.2235	29.7573	28.9328	28.9129	28.1973	28.7767	28.7236	29.3968	27.6487	29.0827	28.4323	29.1122	29.1663	28.6906	27.9076	28.6633	29.6349	29.292	29.2725	29.4936	29.2035
A0A3B3ISV4	A0A3B3ISV4	#N/A	VKORC1L1	VKORC1L1	25.7692	25.8509	24.6731	25.4233	26.1293	26.3342	26.4216	24.6835	25.9504	26.1065	26.4794	26.0058	26.2544	26.9653	27.0698	25.847	23.5322	23.6517	23.9739	24.6039	26.6356	24.8935	24.3357	26.7638	26.4627	26.7405	26.2243	26.4998	25.6642	26.3154	22.7477	25.8906	25.7499	25.8174	24.7142	26.3214	26.7821	26.0072	25.7334	26.5369	26.3073	23.2743	23.481	22.9055	24.5209
A0A3B3ISX9;A0A087WWA5	A0A3B3ISX9	#N/A	TNXB	TNXB.1	33.1645	34.0069	33.6084	33.8853	33.6131	33.3157	33.6754	31.966	32.012	32.5365	31.8386	32.8672	33.182	31.8821	31.9961	31.521	32.5952	32.5897	32.2885	31.6485	31.2259	32.5855	32.9225	32.2033	32.9956	33.2545	33.5675	34.1926	33.3865	32.8536	33.138	33.022	34.6185	32.7638	33.8526	33.852	31.8412	32.5458	34.0836	33.4273	33.1716	32.3334	32.8627	33.746	33.2286
A0A3B3IT47;Q9Y2I8;Q9Y2I8-2;E7EQ49;A0A087WTQ2;Q9Y2I8-3;C9JGR9	A0A3B3IT47;Q9Y2I8;Q9Y2I8-2;E7EQ49;A0A087WTQ2;Q9Y2I8-3;C9JGR9	WD repeat-containing protein 37	WDR37	WDR37	26.6387	26.6808	26.4829	26.2842	26.6539	26.471	27.2588	26.6971	26.6798	26.0372	26.5612	26.7523	25.8528	27.1667	26.3733	26.243	27.4371	25.6069	26.31	26.7042	28.4759	27.3541	26.4021	26.6699	26.3796	26.1	26.3121	26.8492	26.9526	27.1064	25.5923	27.1398	27.3888	27.0934	26.827	26.5475	27.5098	26.2826	27.2075	25.9434	26.8375	23.491	26.7308	26.5081	26.7309
A0A3B3IT82;P54132;H0YNU5	A0A3B3IT82;P54132;H0YNU5	Bloom syndrome protein	BLM	BLM	26.759	26.1409	23.9231	25.4188	27.0061	24.61	28.3505	26.667	27.47	25.845	27.1263	23.2661	27.2619	29.1966	26.1188	25.9869	24.1388	23.3012	26.8225	21.2876	24.0406	22.6738	27.1477	23.5741	23.5382	25.1592	22.7905	24.1671	27.254	22.6878	23.5075	23.4328	24.1276	27.1119	27.4533	24.1214	26.6988	22.8353	23.7946	26.9036	23.3012	27.7638	27.4405	27.9733	25.9704
A0A3B3ITP4;Q495G5;Q8IVH4;D6RIS5;A0A3B3IRG3	A0A3B3ITP4;Q495G5;Q8IVH4;D6RIS5	Methylmalonic aciduria type A protein, mitochondrial	MMAA	MMAA	27.0614	27.0249	26.1919	26.9465	26.9206	27.8227	27.8286	27.0007	28.2283	27.7553	28.0261	28.1443	26.8012	27.7875	27.5231	27.5439	27.8984	26.9853	26.9268	28.1471	28.2976	28.1734	28.1876	28.091	26.9805	28.5855	26.9936	27.6258	27.0284	27.9627	27.6355	27.374	27.5803	27.4466	26.899	28.3276	26.1405	26.1971	25.7899	26.9183	27.2071	23.6518	24.5778	27.5538	27.0946
A0A3B3ITT5;P47914	A0A3B3ITT5;P47914	60S ribosomal protein L29	RPL29	RPL29	29.1197	28.7409	28.3834	28.636	28.5618	27.7767	27.2475	28.7154	27.85	28.1613	28.015	28.3647	28.0573	28.6223	28.2632	29.7497	28.1069	28.3827	28.6025	28.7273	28.7017	28.0294	28.2787	29.1883	28.4825	28.3585	28.1223	28.1067	29.0487	29.0162	27.8165	28.2849	27.9864	28.9265	28.1453	28.1607	27.9304	28.6491	28.8809	28.7706	28.319	28.0185	28.2168	27.3868	27.9063
A0A3B3ITU8;A0A3B3IU04;A0A3F2YNW8;Q14643-4;Q14643-3;Q14643-8;Q14643-7;Q14643-5;Q14643-6;Q14643-2;Q14643;A0A3B3ITQ1;A0A3B3IU05;A0A3B3IU13;A0A3B3IRP0;B7ZMI3;A0A3B3IRT5;A0A3B3IS59;A0A3B3ITM1;A0A3B3IRZ9;A0A3B3ISR4;A0A3B3ITQ4;A0A3B3ISE3	A0A3B3ITU8;A0A3B3IU04;A0A3F2YNW8;Q14643-4;Q14643-3;Q14643-8;Q14643-7;Q14643-5;Q14643-6;Q14643-2;Q14643;A0A3B3ITQ1;A0A3B3IU05;A0A3B3IU13	Inositol 1,4,5-trisphosphate receptor type 1	ITPR1	ITPR1	24.2467	24.9475	26.4794	26.8158	25.0954	25.6895	26.4239	25.5665	22.0415	24.844	27.6362	27.531	27.1491	25.4578	32.7298	27.2086	27.0271	26.3179	27.1144	31.1332	30.583	27.6577	28.065	25.3153	26.9105	26.3022	27.1824	26.6502	26.5606	26.4841	25.1819	25.9322	28.4157	26.5431	26.6235	27.1161	24.7668	24.504	26.8731	25.5617	27.475	25.9096	26.1893	23.257	25.2278
A0A3B3ITX9;H7C2G0;C9JX40;P55822-2;C9JJT2;B4DLW3;H7C1Y8;A0A096LNT6;A0A3B3IUG4;H7C3V3;A0A3B3ISA8;C9JLV3	A0A3B3ITX9;H7C2G0	#N/A	WRB-SH3BGR	WRB-SH3BGR	30.6444	30.4157	30.7478	30.1287	30.3905	30.2144	29.8012	30.7061	30.5644	30.1548	30.321	30.6706	29.9917	29.8921	30.2304	29.7819	30.3313	29.5117	30.1914	30.3814	29.6905	30.4592	30.102	30.4244	30.2356	29.6566	30.1857	30.2135	29.932	30.2311	30.3434	30.2724	22.9139	30.2299	29.6074	30.1984	29.906	29.8227	29.5167	29.7044	30.1621	30.7196	30.0513	30.2954	31.0503
A0A3B3ITZ9;Q9Y2W1	A0A3B3ITZ9;Q9Y2W1	Thyroid hormone receptor-associated protein 3	THRAP3	THRAP3	25.8146	24.6404	25.3928	25.658	26.0929	24.9232	24.0491	25.4922	24.7033	24.584	24.846	26.3087	26.2152	26.402	25.6779	26.0934	25.1992	24.7532	25.9549	25.9574	25.1081	26.3867	25.826	26.1058	25.9353	25.082	23.514	25.586	26.5836	25.5405	25.8866	24.9904	25.3248	25.1887	24.6847	25.2001	22.9038	26.8092	26.6203	25.2409	22.2661	24.9525	23.1347	26.0436	26.8869
A0A3B3IU55;Q8WXE9;Q8WXE9-3;H0YJ05	A0A3B3IU55;Q8WXE9;Q8WXE9-3	Stonin-2	STON2	STON2	23.6677	23.5058	25.1585	23.9291	22.2823	20.7179	22.4715	18.2974	24.4449	25.282	22.6627	23.5836	25.0073	21.052	24.0118	26.6907	25.1249	22.3689	23.4815	24.6886	24.2097	25.4609	22.5451	23.5544	26.6139	24.3649	25.3399	24.2625	25.5274	26.7951	22.8709	25.2608	26.5793	23.0723	24.7363	23.1262	22.9322	22.566	25.0889	23.2303	23.4367	24.9975	24.9128	24.6588	24.2521
A0A3B3IU69;O00423;O00423-3;G3V3N9;G3V4H6;G3V538;G3V5C8;G3V3J1;H0YJK4;H0YJY3;H0YJD8	A0A3B3IU69;O00423;O00423-3	Echinoderm microtubule-associated protein-like 1	EML1	EML1	28.4331	28.3572	28.4275	27.8926	28.3962	28.5821	28.5405	28.5064	28.9349	28.8994	28.3387	28.18	28.01	27.9628	28.1478	28.1972	28.2072	28.4126	28.2726	28.2006	27.4816	28.0317	28.0582	27.0584	28.3619	28.339	28.5412	28.8452	28.7112	28.7398	28.7622	28.5559	28.2061	28.5006	28.9854	28.5065	28.2904	28.4164	28.3188	28.8384	28.4944	28.717	28.209	28.2161	28.623
A0A3B3IUB1;Q13144;A0A3B3ISX3;A0A3B3ITG6;A0A3B3IUF2;A0A3B3ISM8;A0A3B3ITQ2;A0A3B3IS56;A0A3B3IRP4;A0A3B3ISS1;A0A3B3ISV1;A0A3B3IST9;A0A3B3ISI2;A0A3B3ITK8;C9JRD9;A0A3B3IT53;H7C2X0	A0A3B3IUB1;Q13144;A0A3B3ISX3;A0A3B3ITG6;A0A3B3IUF2;A0A3B3ISM8;A0A3B3ITQ2	Translation initiation factor eIF-2B subunit epsilon	EIF2B5	EIF2B5	25.8134	26.738	24.2506	26.6188	26.177	25.9588	27.0709	27.5379	27.7851	27.2223	26.2608	27.2924	26.4962	26.1337	26.5502	26.6077	27.6418	27.4212	23.8694	26.7803	26.1674	27.2028	26.1787	24.8269	27.5381	26.8846	26.2776	26.36	23.8041	24.3348	27.6881	27.1983	23.9526	24.1298	27.1378	27.7443	25.547	25.6086	26.7336	25.9814	26.4538	24.071	25.3822	27.3633	26.4152
A0A3F2YNY6;O75400-2;H7C2N3;H7BXZ7;O75400-5	A0A3F2YNY6;O75400-2	Pre-mRNA-processing factor 40 homolog A	PRPF40A	PRPF40A	27.7697	22.8905	23.7678	26.4334	27.1154	24.7442	23.0251	26.7666	24.4465	22.5655	24.5246	23.8426	21.1517	23.487	22.9303	23.7088	23.3803	22.3542	23.4367	23.9811	22.7045	24.4761	24.5644	23.283	23.0844	25.0074	24.386	22.8735	27.7241	27.1562	22.7756	26.6531	23.8878	28.8525	27.1531	27.5689	22.5512	24.8972	27.6408	24.9219	24.2684	24.1469	24.4703	25.3968	22.8838
A0A3F2YNY7;P08397;A0A3B3IRR1;P08397-2;F5H345;P08397-3;F5H0P4;P08397-4;F5GY90;F5H226;A0A3B3IU56;A0A1W2PNU5;A0A3B3IU34;A0A0G2JQQ7;F5H4X2;F5H4W5	A0A3F2YNY7;P08397;A0A3B3IRR1;P08397-2;F5H345;P08397-3;F5H0P4;P08397-4;F5GY90;F5H226	Porphobilinogen deaminase	HMBS	HMBS	25.5536	26.3947	26.7742	26.5916	26.0772	25.1703	26.2614	22.0422	26.6292	25.3875	25.5943	26.1957	26.2593	27.6918	25.4017	25.4783	26.0275	26.0292	26.2224	26.3685	26.1836	26.2242	27.0212	23.5772	25.4265	27.0108	25.7682	25.8244	26.893	25.8185	27.0583	27.0001	26.3363	27.3577	24.6315	25.9786	22.9281	27.4201	27.386	25.7194	27.5567	23.2318	25.4122	23.1926	25.4399
A0AVT1;A0AVT1-2;H0Y8S8;A0AVT1-3;A0AVT1-4;H0Y9U5	A0AVT1;A0AVT1-2	Ubiquitin-like modifier-activating enzyme 6	UBA6	UBA6	27.1757	27.7731	27.4785	28.2454	28.0482	27.7401	27.8418	27.4067	27.9973	27.7123	27.9584	27.6952	26.9506	28.3986	28.2932	28.1921	28.3591	27.4281	27.9639	28.4006	28.481	27.4367	27.4606	28.1956	28.5514	28.3908	28.8397	28.072	28.1332	28.1894	26.5467	28.1907	28.672	28.7095	27.7502	28.5449	28.3795	28.6934	28.7068	28.2363	28.2295	26.2948	28.1307	27.2927	28.1592
A0PJW6;G5EA27	A0PJW6	Transmembrane protein 223	TMEM223	TMEM223	25.7124	27.3191	26.2882	24.5469	25.6175	26.1793	27.1777	27.061	28.1955	27.7415	27.628	27.0805	27.3833	26.2959	27.5568	27.8337	27.8917	27.1827	27.3696	27.2625	27.1901	27.5872	27.1218	26.6718	25.8995	27.4455	27.0376	24.0009	27.2346	27.2748	27.9814	27.4961	24.9049	27.2409	26.2002	27.6513	27.2299	27.0371	25.48	26.8051	26.9148	26.7878	25.9044	24.2469	26.372
A1A4S6;H0Y8W5	A1A4S6;H0Y8W5	Rho GTPase-activating protein 10	ARHGAP10	ARHGAP10	24.6765	24.0693	24.3248	24.4164	23.2614	25.4402	25.8265	23.6126	22.3623	23.4275	25.5914	23.1372	25.7842	23.8604	26.4923	23.2937	25.6635	25.7378	25.9137	26.4202	24.1644	26.2497	23.1916	26.3445	25.8005	25.5546	26.8369	26.0006	25.0958	23.1673	26.3168	25.213	23.8266	26.602	25.4761	25.7031	22.9886	25.6198	25.3719	25.9425	24.5455	25.793	24.2142	23.6222	25.5142
A1L020	A1L020	RNA-binding protein MEX3A	MEX3A	MEX3A	25.1251	21.4272	24.5229	25.4389	24.0532	22.8911	22.5951	23.6829	23.4351	23.7155	23.8049	25.3278	25.1376	24.3735	23.7947	22.9224	25.5527	24.8548	25.5563	25.4293	23.7929	24.8471	26.6954	24.5113	24.8352	25.1933	26.0118	23.9688	23.8635	23.2957	24.7385	22.5256	26.7961	25.2571	24.9948	24.8716	27.3593	25.29	27.5322	26.7844	25.4204	25.0213	23.7863	25.2271	25.5676
A1L0T0;M0R026;M0QZX5;E9PJS0;M0R1B5;E9PL44;E9PNL1	A1L0T0;M0R026	Acetolactate synthase-like protein	ILVBL	ILVBL	31.7735	32.1199	31.5978	31.4517	31.941	32.2071	32.1337	31.5575	31.644	32.0752	31.8508	31.3739	31.4273	31.6591	31.7332	31.4963	31.7478	31.9085	31.3218	31.343	31.6747	31.8849	31.7953	30.9497	31.38	31.8108	31.1697	31.3777	31.7774	31.2185	31.7451	32.0402	30.8948	31.5826	31.3573	31.7671	31.3236	31.7171	31.4526	31.1021	31.8845	31.3244	31.9921	31.0341	31.7089
A1L4K1;H0YLA8	A1L4K1	Fibronectin type III and SPRY domain-containing protein 2	FSD2	FSD2	26.1113	27.0232	27.1457	26.9233	26.4119	25.6783	26.2498	25.42	26.2282	26.9062	26.8713	26.7023	26.4153	25.0255	25.7195	25.7478	27.0553	26.1404	26.3888	25.9864	26.4312	26.8454	23.0102	25.8713	27.1573	26.8854	26.6091	26.4864	26.9729	27.4521	25.9738	26.7127	26.7693	26.5375	24.017	26.9294	27.3659	27.5061	26.0361	26.8855	27.3116	26.3254	28.2608	24.8612	26.557
A2A2Y4-2;A2A2Y4;A2A2Y4-3;A2A2Y4-5;Q5JV61	A2A2Y4-2;A2A2Y4;A2A2Y4-3;A2A2Y4-5	FERM domain-containing protein 3	FRMD3	FRMD3	23.7637	22.761	25.0025	25.4482	26.6728	23.0811	24.1631	27.6861	26.2326	24.4514	25.8274	24.3898	23.2854	26.1445	26.4011	27.1341	27.2645	26.5975	26.6003	25.7384	27.2339	26.8566	23.4534	23.444	25.6377	26.1481	25.7841	25.8881	24.258	27.0368	26.1272	26.9493	26.192	24.5547	22.6192	24.1458	24.8517	24.4885	26.62	23.6693	23.5664	26.5815	25.855	27.7895	25.4906
A2RRP1;A2RRP1-2;H0Y5G7;H7C007;C9JCM7;H7BZR3;H7C1U4;H7BZU5	A2RRP1;A2RRP1-2;H0Y5G7	Neuroblastoma-amplified sequence	NBAS	NBAS	27.537	28.1707	27.0455	27.1962	27.2092	27.4445	26.8257	27.2768	27.7266	27.0409	27.5356	27.0698	27.0433	27.6526	28.0627	27.9402	28.3235	27.8193	27.6258	27.8856	27.1599	27.6005	27.5826	27.0507	27.8114	27.5791	27.2171	26.7175	26.7862	27.9925	27.2649	27.655	25.1615	26.5935	27.5442	27.7421	27.3782	27.4414	23.6655	27.4292	27.0521	24.0528	27.4583	24.4942	26.4788
A2RTX5;A2RTX5-2;B7ZLP8;H0YKB9	A2RTX5;A2RTX5-2;B7ZLP8	Probable threonine--tRNA ligase 2, cytoplasmic	TARSL2	TARSL2	22.7816	25.3217	24.9901	24.8292	22.3711	22.1582	25.3972	26.2864	26.2786	25.2252	24.0592	25.5808	25.206	25.7253	27.1783	25.5209	27.4131	25.9071	25.7282	25.9156	26.8317	26.7469	24.9792	24.8603	22.2391	24.0458	23.7385	25.7484	25.665	23.8092	26.6998	25.5709	26.9174	25.6504	23.4501	23.0539	23.0158	25.2481	24.5409	24.7406	23.7628	24.4735	25.2761	24.0526	23.0161
A3KMH1-3;A3KMH1;A3KMH1-2	A3KMH1-3;A3KMH1;A3KMH1-2	von Willebrand factor A domain-containing protein 8	VWA8	VWA8	30.3722	29.8997	30.8271	30.2096	29.5903	30.7912	29.9725	30.6238	30.2334	31.0647	31.2618	30.5864	29.8999	30.8521	30.5925	30.8278	30.7589	30.9904	30.2919	30.5885	31.1509	30.7787	30.8445	30.2642	30.7433	30.8299	30.1992	30.6623	30.7852	30.9807	30.6526	30.8244	30.5312	30.3373	29.9676	30.212	30.0612	30.5637	29.0181	30.0969	30.7668	30.8386	29.9528	30.226	29.8126
A4D1E9;A4D1E9-2;C9J8R7;C9JNI1;C9JEQ8;F8WBY0;F8WCN4;F8WBB5;A4D1E9-3	A4D1E9;A4D1E9-2;C9J8R7;C9JNI1	GTP-binding protein 10	GTPBP10	GTPBP10	23.5587	24.9608	23.0372	25.2672	23.1828	23.2324	23.7426	25.7517	21.1507	25.67	26.8927	23.7137	22.4259	25.8725	22.4365	26.1447	26.5421	23.0109	25.9527	25.9604	26.1038	26.458	26.5064	23.6101	25.6597	26.0012	25.3011	25.8624	26.4117	26.3082	25.5686	26.2193	25.1391	26.027	24.4388	25.7937	23.0751	26.3556	22.6437	23.3568	26.2182	26.0793	27.3332	23.8122	23.9925
A4FU69-3;A4FU69;A4FU69-4;A4FU69-2;H0Y843;A4FU69-5;K7EJC3;C9J1E6	A4FU69-3;A4FU69;A4FU69-4;A4FU69-2;H0Y843;A4FU69-5	EF-hand calcium-binding domain-containing protein 5	EFCAB5	EFCAB5	26.4931	27.4219	22.4382	26.3204	24.506	26.8203	22.879	26.3347	22.7437	23.7812	25.0176	23.5897	25.1074	26.6312	25.9177	27.0595	27.168	24.1284	23.2155	25.9337	24.901	27.8673	25.4524	26.3873	23.9869	26.2119	23.5552	26.8267	24.1543	25.4138	27.4046	26.7935	26.8798	24.6003	26.0972	27.3164	25.2787	28.939	28.1207	23.3005	22.2082	22.8689	27.0666	22.7597	26.386
A4UGR9-2;A4UGR9;A4UGR9-8;A4UGR9-3;A0A0A0MQZ3	A4UGR9-2;A4UGR9;A4UGR9-8;A4UGR9-3	Xin actin-binding repeat-containing protein 2	XIRP2	XIRP2	33.125	33.8386	33.2565	33.3845	33.3733	33.5398	33.6521	34.8074	32.8156	31.6634	32.8347	32.7356	33.1221	35.3422	35.6485	34.886	32.8497	32.1583	32.2313	34.4715	31.7348	32.7177	32.3048	34.7269	32.7475	32.1292	33.2081	32.6805	32.3128	32.5219	32.7999	32.6981	31.295	32.9025	32.8039	32.4991	32.267	32.8677	31.4995	33.1307	32.9124	32.4608	33.5679	33.0038	33.6271
A5D6W6	A5D6W6	Fat storage-inducing transmembrane protein 1	FITM1	FITM1	23.4016	24.8705	26.2021	23.8557	22.608	21.9622	25.2071	23.9463	22.2096	23.8794	25.2756	24.6082	26.6017	24.1899	23.077	26.6538	26.6946	25.2652	25.9499	27.2261	25.4704	26.498	26.2905	23.8102	26.5101	24.8114	25.2066	22.3531	26.0473	23.3216	26.5231	23.9048	23.4459	23.6834	24.1885	25.9023	25.0912	25.062	26.9185	25.0518	23.2866	24.1658	25.2727	24.3167	23.7272
A5YKK6;A5YKK6-2;A5YKK6-3;A5YKK6-4;H3BMZ2;H3BNB1;H3BVC9;H3BTH2;H3BR89;H3BMH0;H3BT18;H3BU44	A5YKK6;A5YKK6-2;A5YKK6-3;A5YKK6-4	CCR4-NOT transcription complex subunit 1	CNOT1	CNOT1	27.105	23.5596	27.0761	24.1105	23.4964	23.6674	24.3061	23.828	23.5519	23.6455	24.4955	25.1965	22.8842	23.5299	26.7923	27.9099	24.2652	27.0146	26.2902	25.2966	22.7491	26.2657	24.0097	23.723	23.8762	27.0571	23.8491	22.5807	27.0037	23.4461	24.8664	23.8184	26.3586	25.1149	27.1726	27.5292	25.9027	22.9478	26.8151	26.823	26.7244	27.6122	28.0853	28.0453	26.8812
A5YM72-4;A5YM72-5;A5YM72;A5YM72-3;A5YM72-2	A5YM72-4;A5YM72-5;A5YM72;A5YM72-3	Carnosine synthase 1	CARNS1	CARNS1	24.1709	25.0036	22.6529	23.0218	22.6935	25.1398	22.6616	23.7746	25.0405	25.5653	25.6078	24.6588	24.0949	24.9159	24.0858	24.9335	23.1694	23.2749	24.2831	23.9027	25.9106	23.953	25.5297	24.8205	26.3959	26.9294	25.077	25.1144	22.9115	26.056	25.011	25.4372	24.4452	24.6733	23.6863	26.9775	25.6819	25.1623	24.1218	25.344	25.3295	24.4795	24.7741	23.8068	24.8307
A6NC48;Q10588;Q10588-2;H0Y984;H0Y9Q9;H0Y8G4	A6NC48;Q10588;Q10588-2;H0Y984;H0Y9Q9;H0Y8G4	ADP-ribosyl cyclase/cyclic ADP-ribose hydrolase 2	BST1	BST1	26.616	26.6096	26.6195	23.6187	26.8032	26.7248	27.4301	26.563	25.789	23.3445	27.8368	24.2566	26.1296	25.6181	26.9545	25.056	27.1163	26.3916	25.9042	25.9302	25.7323	27.1021	27.0883	26.9152	27.5565	28.7161	27.6193	28.0449	27.282	26.5823	26.8374	23.0934	27.2689	27.0863	28.161	28.7216	27.4761	27.0152	28.1111	27.0195	27.7144	26.1702	21.7865	25.2706	26.3462
H3BTL1;Q9GZQ8;A6NCE7	H3BTL1;Q9GZQ8;A6NCE7	Microtubule-associated proteins 1A/1B light chain 3B;Microtubule-associated proteins 1A/1B light chain 3 beta 2	MAP1LC3B	MAP1LC3B	28.3824	29.391	28.2121	29.7611	28.6127	29.6524	29.6685	30.4819	28.8343	28.3208	28.5505	28.5258	29.031	29.8281	29.1827	29.2597	28.6579	28.0338	27.0998	29.3628	28.1832	28.7054	28.5749	29.0446	28.1058	28.8591	28.2974	28.3063	28.8304	28.9587	28.4079	28.3569	28.3048	28.1069	28.8953	28.899	28.4401	27.781	29.0986	28.2341	28.4627	28.3716	28.0191	27.9817	28.4656
A6NDG6;H3BV17	A6NDG6	Phosphoglycolate phosphatase	PGP	PGP	30.1893	29.8491	30.0414	29.9249	29.145	29.7903	30.1507	30.0751	30.2105	29.8126	29.8904	30.1466	29.9614	29.9786	29.8376	29.1296	30.2877	30.3898	30.3603	29.7688	29.562	30.212	30.5447	29.9359	29.7789	30.2361	29.8069	30.2029	29.8461	29.8128	30.2412	29.7006	29.5953	30.095	29.5123	30.2734	30.3076	30.4348	29.2996	29.324	30.4495	30.5546	30.724	30.3479	29.7914
A6NDU8;A0A0C4DGW6	A6NDU8;A0A0C4DGW6	UPF0600 protein C5orf51	C5orf51	C5orf51	24.8885	23.3997	22.193	25.3792	25.328	24.9877	23.8975	25.323	24.3202	24.9132	22.716	23.7885	22.8722	25.6533	22.4113	24.9574	26.1551	25.3741	25.0874	25.0743	24.2029	25.3673	25.1773	23.1264	22.8094	23.1591	25.4871	23.3491	24.8856	25.7282	24.8614	25.0389	23.762	24.8199	25.0559	24.5244	25.2155	25.397	25.4129	24.6285	24.358	22.9831	24.9316	24.0601	24.5314
A6NEL0;P05114;A6NL93;F2Z2W6;F2Z2Y5;H7BXJ5	A6NEL0;P05114;A6NL93	Non-histone chromosomal protein HMG-14	HMGN1	HMGN1	23.6157	22.1116	23.4674	22.9562	25.5298	22.3664	20.9526	23.1907	22.6011	23.0432	23.6202	23.6667	25.0313	23.9709	25.4895	23.91	23.4666	22.4922	23.2116	25.0279	23.7771	23.6546	22.2834	22.9057	24.0042	22.3428	23.3006	22.4315	23.0826	21.715	22.9416	23.3153	24.0913	25.8089	23.8531	25.3865	25.9543	23.9005	25.5595	25.8254	23.154	24.1143	24.1051	24.3488	24.3621
A6NEM2;P51610-4;P51610-3	A6NEM2;P51610-4	Host cell factor 1;HCF N-terminal chain 1;HCF N-terminal chain 2;HCF N-terminal chain 3;HCF N-terminal chain 4;HCF N-terminal chain 5;HCF N-terminal chain 6;HCF C-terminal chain 1;HCF C-terminal chain 2;HCF C-terminal chain 3;HCF C-terminal chain 4;HCF C-terminal chain 5;HCF C-terminal chain 6	HCFC1	HCFC1	23.69	28.0744	25.5485	26.9524	26.5494	27.6661	26.8853	23.3411	26.7914	25.0133	26.1269	26.453	26.1533	24.8674	23.5656	27.3623	26.6585	26.2227	26.717	24.284	26.6414	26.6921	24.4666	26.8503	25.4026	27.3274	26.518	24.4894	27.5828	28.8796	28.0719	25.5229	27.7678	27.7879	27.691	28.2766	23.5701	24.4935	27.3306	27.4953	27.3874	27.968	28.1834	27.508	27.842
A6NFX8;Q9UKK9;A6NJU6;A6NCQ0;C9JYY9;H0YEY4	A6NFX8;Q9UKK9;A6NJU6;A6NCQ0	ADP-sugar pyrophosphatase	NUDT5	NUDT5	26.331	26.1838	24.3143	26.3759	25.123	25.2957	25.4284	25.7955	24.6694	25.3621	22.8763	26.1127	24.9212	27.3466	25.3346	27.2037	25.9298	24.5829	25.031	25.8151	24.8234	26.2333	24.5029	24.5738	25.2267	26.323	26.0486	25.062	26.2211	25.9911	26.1513	25.6434	26.9123	27.243	24.1114	26.8957	23.4287	25.9699	26.1146	25.8041	25.8964	25.754	24.2936	25.7478	24.0988
A6NGQ3;Q5VST9-6;Q5VST9;Q5VST9-2;Q5VST9-5;A0A1B0GTS2;H3BQA7;A0A0A0MRI8;REV__Q9NX65-3;REV__Q9NX65-2	A6NGQ3;Q5VST9-6;Q5VST9;Q5VST9-2;Q5VST9-5	Obscurin	OBSCN	OBSCN	34.329	34.5719	34.6644	34.186	34.4682	34.4687	34.6469	34.467	34.1838	34.7391	34.1904	34.1592	34.1572	33.8609	34.5989	33.9316	34.3641	34.3778	34.4018	34.0988	33.6931	34.3074	34.0003	34.1893	34.433	33.8538	33.9114	34.2513	34.1098	34.1081	34.1665	34.0195	33.7616	34.2609	34.3282	34.1446	33.8823	34.38	34.6188	34.5204	33.9921	34.1041	34.9977	34.4681	34.6123
A6NGW1;O95070;E9PIZ0;C9JST7;E9PS11	A6NGW1;O95070;E9PIZ0;C9JST7	Protein YIF1A	YIF1A	YIF1A	22.7557	24.524	24.0643	25.8026	22.5907	23.2845	23.4928	24.3666	25.7976	23.1129	24.8282	22.6684	23.7778	23.2012	23.9032	23.6844	23.0724	22.1735	24.2804	25.6723	24.25	23.633	23.2217	24.9862	24.819	25.9689	24.2145	23.0061	24.4483	24.3037	22.7461	24.9104	22.8445	24.6624	24.7845	23.8575	22.9984	22.937	23.6831	25.8055	23.4449	23.9987	23.773	25.0754	24.0073
A6NHL2-2;A6NHL2	A6NHL2-2;A6NHL2	Tubulin alpha chain-like 3	TUBAL3	TUBAL3	29.4763	29.7246	29.4291	29.3	29.3275	30.6428	29.738	27.0264	27.2103	27.2696	24.3722	27.0462	26.5023	27.4679	26.6826	24.6707	25.9933	24.795	25.8453	26.2404	25.9223	24.5931	25.9081	25.8894	27.7437	27.5818	24.7754	28.292	28.3058	23.5313	28.2252	27.6538	28.2191	27.5185	29.9784	29.189	27.8226	23.4991	27.8334	26.8151	27.1181	29.2337	30.232	26.6952	29.7444
A6NHR9;A6NHR9-2;J3KTL8;A6NHR9-3;A0A2R8YCU7;A0A2R8YE92;J3KRK8;J3QSH1	A6NHR9;A6NHR9-2	Structural maintenance of chromosomes flexible hinge domain-containing protein 1	SMCHD1	SMCHD1	24.315	23.5553	25.2283	23.4722	23.6849	23.6432	23.5082	23.5798	22.8344	25.5033	25.6312	27.7679	23.259	24.3156	23.7256	24.3313	25.4426	23.6956	24.0799	23.9869	24.255	23.4247	24.6437	19.7336	24.5857	24.2157	25.0206	22.5148	23.2159	24.2194	25.1281	25.8712	25.3395	25.9968	22.1378	20.4698	27.7316	23.3625	25.8915	24.3482	22.5942	24.382	24.9172	23.3746	24.5398
A6NHZ5	A6NHZ5	Leucine-rich repeat-containing protein 14B	LRRC14B	LRRC14B	26.457	25.3563	26.5368	24.4983	22.38	23.012	24.986	22.6801	25.7748	27.1801	26.7124	25.2909	25.5518	23.4056	26.9422	24.4415	27.4348	27.2237	26.4922	26.5071	27.2118	26.8521	26.3883	20.8371	25.87	25.6091	27.1262	26.3822	26.0446	26.6574	27.4974	27.0209	26.1836	26.6221	26.8851	27.0494	24.3321	26.9589	26.6623	27.3173	26.597	26.5507	23.2517	27.6663	24.7462
A6NKD9;H0YJY5;H0YJE0;G3V2D7;G3V5D5;G3V4C8	A6NKD9	Coiled-coil domain-containing protein 85C	CCDC85C	CCDC85C	23.4982	26.1264	25.3347	23.0821	24.1727	23.6179	26.1461	24.1586	24.9973	24.8746	24.658	26.6851	22.5716	22.4613	26.4475	24.5598	23.9061	21.2568	22.359	24.9565	26.8943	25.2473	23.9939	24.2515	24.9172	26.4081	24.1306	24.7333	24.1177	24.0372	24.6163	24.0662	24.1931	23.7783	24.6742	24.2933	23.3464	24.3586	23.6483	26.1349	23.7873	27.6193	27.4365	25.0292	27.4067
A6NLH6;Q9P003	A6NLH6;Q9P003	Protein cornichon homolog 4	CNIH4	CNIH4	27.8275	27.8359	26.7992	25.9125	27.0616	27.9212	27.382	26.2815	28.0397	27.6668	28.597	28.1312	26.8295	27.5818	27.6788	27.871	27.5782	27.5734	26.7763	27.8054	27.6495	27.2777	26.3437	27.5117	27.8289	27.3556	27.8724	27.6354	26.2484	27.3677	27.0308	28.0947	27.23	28.0856	28.962	27.5237	27.4514	26.8196	27.4103	28.0661	27.9349	26.3406	27.5843	25.2144	26.7758
A6NMH6;Q92599-2;Q92599-4;Q92599;A6NFQ9;F8W8I8;A0A087X142;Q92599-3;C9J4G8;C9JV02;A0A0A0MRP8	A6NMH6;Q92599-2;Q92599-4;Q92599;A6NFQ9;F8W8I8;A0A087X142;Q92599-3	Septin-8	SEPT8	SEPT8	27.8485	28.7683	26.6705	28.2879	27.7221	28.4814	28.2818	28.171	28.3877	27.3416	27.2674	28.0701	27.2788	26.7262	25.7145	27.7601	27.835	27.5626	27.9783	27.5958	27.5039	27.7739	27.9054	27.8014	26.2627	27.6001	27.2278	27.8608	28.2604	27.8622	28.4232	28.0893	28.0745	27.3862	28.6553	27.0679	27.7275	27.4664	28.3005	27.4376	27.7902	27.9956	28.3287	28.6336	28.3301
E9PJK1;E9PRJ8;H0YDL9;H0YDJ9;E9PIF1;A6NMH8;P60033;E9PM31;H0YEE2	E9PJK1;E9PRJ8;H0YDL9;H0YDJ9;E9PIF1;A6NMH8;P60033	Tetraspanin;CD81 antigen	CD81	CD81	29.0349	28.5063	28.5612	27.8843	28.1483	29.3434	27.3411	23.3538	27.6264	28.068	27.4731	28.0359	28.5642	29.0241	28.7095	27.7733	28.1906	28.1811	28.2713	28.2882	28.7508	28.4252	28.4228	28.1232	29.0002	28.3843	29.2454	28.3314	28.2898	28.6327	28.3228	28.9947	29.8499	28.9485	28.5316	28.1388	26.6633	28.2451	29.6453	29.5677	28.4565	29.0359	29.1036	28.5586	28.788
A6NMQ3;Q5T5H1;O43768-2;O43768;O43768-9;O43768-3;O43768-4;A0A1W2PRU0;O43768-6;O43768-5;O43768-7;O43768-8	A6NMQ3;Q5T5H1;O43768-2;O43768;O43768-9;O43768-3;O43768-4;A0A1W2PRU0;O43768-6;O43768-5;O43768-7;O43768-8	Alpha-endosulfine	ENSA	ENSA	27.4642	26.8246	27.3541	26.9706	26.46	27.3951	27.1896	26.4707	23.7731	22.5869	25.1223	26.1703	27.8345	26.4813	26.1664	26.2195	24.5093	25.8483	25.9811	24.3503	26.7856	24.6709	24.8864	26.5995	27.0966	25.3423	23.1998	26.5221	26.5062	25.3224	25.7732	26.9647	25.512	26.4923	24.9908	24.5494	25.857	27.1135	27.2873	26.4106	24.9473	27.0931	27.2923	28.542	25.9957
A6NMZ7;A6NMZ7-2;H0Y940;H0YA33	A6NMZ7;A6NMZ7-2	Collagen alpha-6(VI) chain	COL6A6	COL6A6	32.042	32.1661	31.6231	31.7012	33.2302	31.2743	31.6347	29.9604	30.026	29.8242	30.7252	30.9309	31.0534	28.3751	29.2356	29.34	30.2802	28.0789	27.2345	29.3764	31.3044	30.1192	27.3878	29.4829	32.2736	32.9882	32.4581	32.2752	32.6982	31.4758	31.6944	32.0877	34.0029	31.3755	32.449	32.9809	31.0072	27.6239	32.527	32.7492	30.8625	29.0911	30.1246	32.1577	31.4999
A6NNS2;A6NNS2-2;I3NI52	A6NNS2;A6NNS2-2;I3NI52	Dehydrogenase/reductase SDR family member 7C	DHRS7C	DHRS7C	24.9052	23.654	25.124	23.7895	23.5817	23.9981	22.4874	28.8084	27.2013	29.9211	24.0338	26.105	28.5666	28.2409	29.2525	28.6074	28.636	27.7175	28.5418	29.0253	25.5529	29.2858	28.6037	28.2548	25.766	29.521	26.0479	24.0313	22.3875	24.7399	22.2851	23.5218	24.1562	27.4732	24.317	24.855	25.1925	25.7051	27.8008	24.1947	22.4385	24.3687	27.2763	24.2167	25.8936
A6PVN5;Q15257-2;Q15257-3;Q15257;F6WIT2;Q15257-4;Q5T949;Q5T948;A6PVN9;Q68CR8;A6PVN6;A6PVN8;B7ZBQ0;C9IZ76;A6PVN7;H0Y6E5;B7ZBP9;B7ZBP7;B4DDQ6	A6PVN5;Q15257-2;Q15257-3;Q15257;F6WIT2;Q15257-4;Q5T949;Q5T948;A6PVN9;Q68CR8	Serine/threonine-protein phosphatase 2A activator	PTPA	PTPA	29.786	29.9524	29.5557	29.8042	29.835	29.7031	29.982	29.6511	29.5669	29.7401	29.427	29.5966	29.7079	29.7775	29.5306	28.9354	29.6004	29.5243	29.8395	29.493	29.6936	29.8636	29.8512	29.0132	29.4992	30.2044	29.8792	29.8466	29.343	29.4377	29.773	29.5866	29.4201	29.9443	29.8051	30.3318	29.471	29.6189	29.7365	29.5505	30.02	29.0973	29.3893	29.3556	29.3032
A6ZKI3	A6ZKI3	Protein FAM127A	RTL8C	RTL8C	24.9042	23.2041	23.3603	25.1103	25.293	25.5701	24.1717	24.5075	23.0707	22.0498	24.8175	24.0532	24.7732	22.472	24.9408	25.5945	23.5914	25.0043	23.8556	25.1549	25.256	25.0757	25.3385	26.0347	24.3239	25.3286	25.4465	23.5209	25.5191	22.8547	22.9673	23.2574	24.7728	22.7424	23.8885	24.1035	23.0983	24.6867	21.9747	23.174	23.6733	23.2615	23.7941	23.7688	22.9475
A8K878;P55145;H7C2D6	A8K878;P55145	Mesencephalic astrocyte-derived neurotrophic factor	MANF	MANF	27.0967	27.2649	25.1193	27.9062	27.7534	27.9849	28.336	26.7112	23.4438	26.9068	26.0998	27.4623	26.2844	29.1925	27.3836	29.2061	26.9647	27.4819	27.1341	27.495	26.4757	24.8925	26.6046	27.3147	26.1041	27.4671	28.6775	27.3868	27.6339	27.0154	27.7891	26.3566	28.1759	26.436	27.8401	28.456	23.7146	25.9784	27.8833	27.7001	26.6564	27.9797	28.5826	27.2975	27.2838
A8KAH6;Q16082;E9PN16	A8KAH6;Q16082	Heat shock protein beta-2	HSPB2-C11orf52	HSPB2-C11orf52	32.9061	33.3824	32.6133	32.7607	32.5998	32.1653	32.8897	32.1745	32.0196	32.4222	32.2258	32.512	31.8594	31.2185	32.2191	32.0603	32.7606	32.4878	32.8205	32.1438	32.045	31.9665	31.9156	32.4223	32.8925	31.9582	31.9591	32.1753	32.2915	32.3171	32.2025	32.6157	31.7883	32.7876	32.493	32.4522	32.5022	31.1828	31.8637	31.3163	32.2877	31.872	32.3611	32.1836	32.3612
A8MTT3	A8MTT3	Protein CEBPZOS	CEBPZOS	CEBPZOS	23.3979	23.9058	22.7488	24.611	23.8554	21.0531	22.1743	23.4469	23.6216	22.8063	24.0381	22.8549	23.9409	23.5268	23.0579	22.7589	22.4781	23.6825	23.3217	23.4348	24.2552	23.9292	23.0572	23.6761	23.9144	21.7134	23.1559	22.057	24.9755	22.6986	21.6827	23.6273	22.8423	22.076	24.3926	23.7911	23.4285	23.6293	24.1965	24.3419	24.1079	23.3252	23.249	22.9706	22.4871
A8MUA9;A8MU27;P55854;P55854-2	A8MUA9;A8MU27;P55854;P55854-2	Small ubiquitin-related modifier 3	SUMO3	SUMO3	28.6384	27.8104	28.0475	29.342	29.0009	29.1096	28.9064	28.5186	28.6158	28.621	28.3058	28.7508	28.3555	28.8832	27.8262	28.5621	28.6787	28.6626	29.0185	28.5294	28.6033	28.85	28.3304	28.4717	28.8733	28.7355	24.5194	27.9992	29.2529	29.0497	28.8501	28.6734	29.3715	29.2543	28.9258	28.7687	28.2882	28.7092	28.9876	27.2625	25.575	28.9337	28.5543	29.26	28.5491
P62308;A8MWD9;Q49AN9;F5H013;C9JVQ0	P62308;A8MWD9;Q49AN9;F5H013;C9JVQ0	Small nuclear ribonucleoprotein G;Putative small nuclear ribonucleoprotein G-like protein 15	SNRPG	SNRPG	27.4834	27.3077	26.7407	27.7345	27.5214	26.4514	27.4798	27.1146	27.1435	27.7459	27.6903	26.5607	26.4071	27.2789	27.4391	28.2599	27.1499	27.2548	26.9358	27.3495	27.087	27.5431	26.8213	26.8361	27.1281	27.1195	24.9352	26.3568	27.0824	27.0873	27.0693	27.0583	26.539	26.2851	27.533	27.1382	27.5858	28.7591	27.4072	27.6863	27.8528	27.3528	26.8702	27.4944	26.4451
A8MXP9;A0A0R4J2E8;P43243;D6REM6;D6R991;B3KM87;P43243-2;H0Y8T4;Q68E03;D6R8Z5;D6RCM3;D6REK4;D6RBI2;D6RBK5;D6RE02;D6RIA2;D6RB45;A0A1B0GX04;D6R9F3;D6RAM9;D6RAY2;D6RBS2	A8MXP9;A0A0R4J2E8;P43243;D6REM6;D6R991	Matrin-3	MATR3	MATR3	30.7792	30.5076	30.7946	30.4982	30.5335	30.3778	30.2689	30.8614	30.1567	30.5727	30.3785	30.1833	30.2092	31.2593	30.5989	31.1946	31.126	31.1435	31.2286	30.4572	30.4381	30.6818	30.5929	30.7058	30.4891	30.7124	30.9296	30.1535	30.4965	30.6945	30.6224	31.1035	30.6918	31.3483	30.7262	30.761	30.896	30.6712	30.7479	30.8938	30.6887	30.9087	30.8919	30.9788	30.3729
A8MXV4	A8MXV4	Nucleoside diphosphate-linked moiety X motif 19, mitochondrial	NUDT19	NUDT19	29.529	28.8894	28.2911	28.9383	29.5317	28.7224	30.1432	29.7919	29.7575	29.8785	28.9898	28.6152	29.3069	29.0045	30.1315	29.301	28.9942	29.0908	29.3633	29.3529	29.062	28.6989	29.6124	29.5903	28.6859	29.3154	27.7161	29.3988	29.3633	29.4981	28.8359	29.526	27.3141	28.8356	28.7953	29.1453	28.2409	28.97	27.2561	28.2781	29.096	28.9626	29.7372	28.4235	28.8824
A8MXZ9;Q14896;A0A0A0MQU5;Q14896-2;F5GZR4	A8MXZ9;Q14896;A0A0A0MQU5;Q14896-2;F5GZR4	Myosin-binding protein C, cardiac-type	MYBPC3	MYBPC3	38.4328	38.7237	38.8377	38.2744	38.532	38.2615	38.7426	38.5109	38.6402	38.6123	38.6056	38.602	38.6403	38.0693	38.542	38.1681	38.5101	38.6233	38.4269	38.3386	38.4322	38.5839	38.4835	38.2602	38.4906	38.1992	38.2019	38.3526	38.4926	38.6778	38.558	38.553	37.885	38.4246	38.5024	38.4126	38.3968	38.6575	37.6506	38.6203	38.6916	38.4431	38.7917	38.6181	38.6805
B0I1T2;A0A3B3IU30;B0I1T2-4;B0I1T2-3;F8WEW9;B0I1T2-2;F8WAS7	B0I1T2;A0A3B3IU30;B0I1T2-4;B0I1T2-3;F8WEW9;B0I1T2-2	Unconventional myosin-Ig;Minor histocompatibility antigen HA-2	MYO1G	MYO1G	26.8421	25.6281	26.6263	26.1469	25.8092	25.8559	26.5717	23.0975	26.1456	25.9408	24.7838	25.7189	25.7281	22.2087	25.8387	25.0695	25.5224	25.6445	25.7651	24.8293	25.172	24.8289	24.1165	23.146	22.9958	22.5936	22.9695	22.8783	23.3578	25.1626	23.2061	23.8533	25.1723	23.594	24.6962	23.7984	22.6969	23.6624	23.7927	25.6856	23.8335	25.0531	27.6874	26.2629	26.4197
B0QY89;Q9Y262;Q9Y262-2;B0QY90;C9JHP4;C9K0Q7;H7C3A0;H0Y7E6	B0QY89;Q9Y262;Q9Y262-2;B0QY90	Eukaryotic translation initiation factor 3 subunit L	EIF3L	EIF3L	30.3028	30.6302	30.0461	30.1439	30.1616	30.053	30.0743	29.9784	29.9937	30.3726	30.169	30.0638	29.8794	30.7471	30.7347	30.9048	30.4787	30.6359	30.1968	30.5799	30.1174	30.4229	29.8856	30.4023	30.4563	30.6327	29.5509	30.1282	30.1056	30.6001	29.9769	30.0076	29.9117	30.1269	30.0372	30.189	29.2263	30.1205	29.5779	30.0543	30.0755	29.8598	29.5544	29.7952	30.1501
B0QYK0;Q01844-6;Q01844-3;Q01844;Q01844-5;A0A0D9SFL3;C9JGE3;Q01844-2;Q01844-4	B0QYK0;Q01844-6;Q01844-3;Q01844;Q01844-5;A0A0D9SFL3;C9JGE3;Q01844-2	RNA-binding protein EWS	EWSR1	EWSR1	26.9555	27.9155	27.546	26.7626	27.4072	27.6836	27.783	27.8469	27.5124	27.9898	27.3644	27.8698	26.4122	27.0107	27.2059	27.7671	27.1006	26.7152	27.1519	27.8067	26.9499	26.2878	27.3974	26.344	26.7969	27.251	27.0488	26.9734	27.6106	27.8746	27.203	27.6713	28.4227	28.1478	28.0556	27.0237	27.4629	25.672	27.3761	27.6962	26.1656	27.5061	27.1891	29.0383	27.5696
B0QZ18;Q99829;A6PVH9;F2Z2V0;E7ENH5;Q5JX58;Q5JX59;Q5JX60;Q5JX44;Q5JX45;Q5JX56;Q5JX55;Q5JX61;Q5JX52;Q5JX54;Q5JX57;E7EV27;H0Y524;Q5JX53	B0QZ18;Q99829;A6PVH9;F2Z2V0;E7ENH5;Q5JX58;Q5JX59;Q5JX60;Q5JX44;Q5JX45;Q5JX56	Copine-1	CPNE1	CPNE1	28.6326	28.8564	27.1668	29.1919	28.0694	29.7535	28.6456	29.0746	28.9075	29.4063	29.0681	29.1543	28.516	29.7191	28.9988	22.4712	29.7446	28.5493	29.4636	29.0185	29.0682	28.933	29.5464	28.6231	28.8228	29.5946	28.362	29.3611	29.5038	27.7197	29.4625	28.098	29.0802	29.5497	29.9207	29.7245	29.7254	29.1758	29.8579	28.6636	29.6889	28.7627	28.6234	28.0892	28.534
B0YIW2;P02656	B0YIW2;P02656	Apolipoprotein C-III	APOC3	APOC3	28.1086	27.817	27.644	29.1096	29.3665	27.5692	27.436	28.3537	26.1027	27.0087	26.5297	27.9317	27.6413	26.162	27.2012	27.3571	27.8135	25.9798	27.6924	27.7847	26.133	26.354	29.4645	28.0698	29.4293	29.3223	28.6702	29.1962	29.5905	23.2554	29.4851	28.1587	29.4318	28.2073	29.5009	28.7315	28.2799	29.0502	29.9944	23.6439	29.7647	29.9982	27.4028	29.3441	28.9967
B0YJ81;A6NP58;B0YJ81-2;J3KT94;J3KS69	B0YJ81	Very-long-chain (3R)-3-hydroxyacyl-CoA dehydratase 1	HACD1	HACD1	26.258	26.4083	27.5822	25.5348	26.6137	27.3465	27.4806	26.8399	27.5798	26.6432	26.9061	27.0238	27.7496	27.4799	27.9147	24.837	26.0126	27.1712	26.9056	27.1697	26.5558	27.5011	25.7665	27.3169	27.3401	26.4957	27.6544	26.8152	26.6596	27.1528	27.4864	26.9213	24.7343	27.012	27.2363	27.4983	26.5204	27.6043	23.8815	27.6738	25.1253	26.3455	27.4604	27.629	26.9032
B1AKJ5;O43847;O43847-2;G3V1R5;F5H7V1;H0Y5G9	B1AKJ5;O43847;O43847-2;G3V1R5;F5H7V1	Nardilysin	NRDC	NRDC	23.838	27.3935	27.2567	26.0031	27.0374	25.3401	26.721	27.0895	23.6885	25.0562	24.496	24.1954	24.2712	29.3429	26.5456	23.7109	26.427	27.2424	24.183	26.4022	26.167	25.9291	22.4098	26.9967	24.0595	27.0537	23.8367	23.5255	23.189	25.4719	25.4786	25.4821	24.1573	26.0918	27.5664	24.0817	24.9596	26.4649	23.1109	22.7857	23.054	27.6247	28.0022	24.026	26.1865
B1AKY9;P50993;H0Y7C1	B1AKY9;P50993;H0Y7C1	Sodium/potassium-transporting ATPase subunit alpha-2	ATP1A2	ATP1A2	33.871	33.6412	33.3227	33.0684	33.092	33.3659	33.3655	33.3953	33.2664	33.5692	33.7499	33.3402	33.0394	32.2266	32.948	32.8092	33.1211	33.5426	32.8981	32.9113	32.7975	32.8396	32.98	33.2009	33.2647	32.8567	33.4661	33.4728	33.3622	33.4847	33.4526	33.5391	33.1751	33.6224	33.8565	33.4274	32.9999	33.3436	32.5868	33.7904	33.8684	33.6955	33.5675	33.3601	33.1614
B1ALA9;P60891;A0A2R8Y7H4;P60891-2;B7ZB02;A0A0B4J207;P21108;B1ALA7;Q15244	B1ALA9;P60891;A0A2R8Y7H4;P60891-2	Ribose-phosphate pyrophosphokinase 1	PRPS1	PRPS1	29.222	29.748	29.165	30.0636	29.6438	28.8327	29.929	29.2106	28.9339	29.737	29.8212	28.6108	29.129	28.6019	28.7588	29.2523	28.548	28.789	28.7191	28.2064	29.4013	29.0332	28.7661	28.8003	29.5345	28.8763	29.0151	29.0323	29.1421	28.9118	28.5468	29.3113	28.7867	29.001	29.4774	28.8679	29.7359	29.6402	28.8885	28.6663	29.5462	29.3807	29.0063	29.817	29.0576
B1ALD9	B1ALD9	#N/A	POSTN	POSTN	24.5396	29.0924	27.0481	30.5411	29.046	30.2175	29.5101	24.528	22.2999	24.0866	23.3765	24.2361	25.2343	27.9838	24.2909	24.6669	22.0672	23.2396	25.2228	23.5495	24.1835	23.2316	22.7886	23.1195	24.2743	26.7806	24.9024	24.5946	25.3318	23.9166	22.9088	27.496	25.645	23.876	22.8592	25.1316	23.4504	22.8519	25.6803	25.1126	25.1065	25.1521	28.2052	25.8494	26.5607
B1ALH6;O14832;O14832-2;C9IYS5;C9JR86	B1ALH6;O14832;O14832-2;C9IYS5	Phytanoyl-CoA dioxygenase, peroxisomal	PHYH	PHYH	26.2025	23.8417	26.9791	24.7549	24.4976	25.9695	25.2158	26.74	24.8325	25.165	22.4248	22.5986	24.862	24.7846	25.3347	26.6288	25.0564	26.6196	24.7207	25.1334	26.435	24.6163	26.6543	24.7477	27.1221	22.1791	26.8731	25.4854	25.5027	27.0328	26.8058	27.0002	26.6266	26.4349	26.1992	25.5055	25.8447	23.6505	26.7924	27.041	26.3521	25.6467	24.3645	25.6892	25.8316
B1AMS2;Q14141-2;Q14141-4;Q14141;Q14141-3	B1AMS2;Q14141-2;Q14141-4;Q14141	Septin-6	SEPT6	SEPT6	26.5085	27.2448	25.9936	26.6899	26.9477	26.8866	26.4921	26.7234	26.3468	26.8573	26.6753	26.4718	27.0469	26.5799	26.2973	26.5946	26.9149	26.1059	26.709	26.2132	26.4653	25.9426	24.0056	26.0601	26.3512	26.6553	26.6525	26.4629	26.9607	23.4964	26.7797	27.503	28.0067	25.7331	27.7904	27.104	22.2547	25.1988	25.8815	27.2611	25.1845	27.0056	27.3253	26.2842	26.4847
B1AMW1;P19256-2;P19256-3;P19256;H0YDI1	B1AMW1;P19256-2;P19256-3;P19256;H0YDI1	Lymphocyte function-associated antigen 3	CD58	CD58	25.8195	24.0617	25.0288	25.8849	24.4819	25.5976	26.5935	26.1851	26.2838	26.5362	24.0781	25.8535	25.443	26.9322	24.0335	26.797	26.9229	25.6284	25.8234	25.1005	26.366	25.2796	25.5614	25.9575	26.5343	24.9365	26.3654	25.0372	26.2917	26.5691	25.3275	26.4827	26.5527	25.8675	26.2715	25.3598	24.6779	25.8965	26.5155	24.3247	22.1396	26.4712	26.1011	26.3243	25.152
B1AP13;P08174-2;P08174-4;P08174;P08174-3;P08174-5;H3BLV0;B1AP15;A0A2R8YDY3;A0A2R8YEC5;A0A2R8Y4B4	B1AP13;P08174-2;P08174-4;P08174;P08174-3;P08174-5;H3BLV0	Complement decay-accelerating factor	CD55	CD55	23.9653	26.3113	26.0081	27.5165	26.9772	25.6793	25.7242	22.1405	23.176	25.6739	23.0264	24.4182	24.0111	23.8818	25.8339	24.9948	27.4256	26.2331	24.8361	25.0133	25.5831	25.0966	24.7944	25.799	25.6383	26.6875	24.428	24.7987	24.3218	22.9898	24.6775	26.2306	23.1346	24.9845	23.7724	24.2658	26.8442	25.7369	26.2975	27.7687	26.0799	24.176	23.699	23.0848	22.9531
B3KS98;O15372;A0A087WZK9;E5RJT0;E5RGU4;E5RFW7;E5RFH0;E5RHC7;E5RH59	B3KS98;O15372;A0A087WZK9	Eukaryotic translation initiation factor 3 subunit H	EIF3H	EIF3H	28.4951	27.6017	27.3286	28.1161	28.2221	28.5285	28.1592	28.3402	27.967	28.969	28.0685	28.2586	28.8132	29.558	28.6673	28.5117	27.5913	28.1868	28.2508	28.1328	28.6029	27.5376	28.1429	28.8083	28.4789	26.4601	28.7321	28.1257	28.2896	27.5551	27.5078	27.9531	28.3336	27.8514	28.1437	26.8975	26.8494	28.0943	28.3794	28.5327	26.1322	26.7352	27.7987	28.0838	28.2281
B3KTM8;Q9UBU8-2;H0YMJ0;Q9UBU8;H0YLJ3;Q9UBU8-3;H0YM21;H0YNE0;H0YLV1;H0YMT8;H0YNX3;H0YNI8	B3KTM8;Q9UBU8-2;H0YMJ0;Q9UBU8;H0YLJ3;Q9UBU8-3;H0YM21;H0YNE0	Mortality factor 4-like protein 1	MORF4L1	MORF4L1	23.3203	27.5269	28.5362	28.4483	27.733	26.2407	21.9148	23.7368	26.5612	23.6061	24.4874	22.0608	22.9451	24.7025	22.5056	22.121	23.4455	24.8889	22.3046	23.7606	24.185	24.6961	26.9914	24.459	23.0841	23.7469	23.8414	21.8188	28.8468	25.5965	25.8007	22.6691	23.9093	27.201	25.6919	23.7776	29.4221	27.1317	23.0148	23.3495	20.4135	29.1246	24.0241	27.1214	26.7394
B3KW70;F5GYX4;H0YG03;Q13361-2;Q13361;H0YGS3;F5H7Z2;F5H2W4;F5H413	B3KW70;F5GYX4;H0YG03;Q13361-2;Q13361;H0YGS3;F5H7Z2;F5H2W4	Microfibrillar-associated protein 5	MFAP5	MFAP5	28.3735	28.4239	29.7152	29.0055	27.8531	29.0395	28.8575	25.4728	27.957	27.5813	27.2295	27.6077	28.7906	26.3871	27.21	27.8116	27.9909	27.3424	28.6155	27.4799	27.0334	28.468	28.0843	28.0897	28.3593	27.7877	29.1636	28.8228	28.4837	28.223	28.0384	29.4	28.4071	27.0043	28.3728	27.7106	28.5131	28.9509	29.3345	28.5057	29.0852	27.881	28.0024	29.1392	29.0675
B4DDF4;B4DUT8;Q99439;A0A087X271;A0A087X1X5;H3BVI6;Q99439-2;K7ES69;H3BQH0;A0A087WV51;U3KPS3	B4DDF4;B4DUT8;Q99439;A0A087X271;A0A087X1X5;H3BVI6;Q99439-2;K7ES69	Calponin;Calponin-2	CNN2	CNN2	27.1081	28.2945	25.8847	28.2043	27.8494	28.2063	27.7104	27.4679	27.6745	27.3208	26.6773	27.6822	25.8934	27.9356	28.4455	27.6083	28.5816	26.5899	25.9908	27.8575	27.0029	28.3567	28.0622	28.0869	27.4762	26.0357	25.843	27.1716	27.9481	28.0484	27.8282	27.8891	26.8422	27.2758	26.5818	26.8045	25.931	27.2689	27.6974	24.6401	27.7025	26.1295	26.9287	26.3035	27.4821
B4DJV2;O75390;A0A0C4DGI3;H0YIC4;F8VPA1;F8W4S1;F8VRI6;F8VPF9;F8W1S4;F8VRP1;F8VX68;F8VTT8;F8VZK9;F8VR34;F8W0J2	B4DJV2;O75390;A0A0C4DGI3	Citrate synthase;Citrate synthase, mitochondrial	CS	CS	36.6862	36.4396	36.5323	36.5368	36.4353	36.4124	36.7735	36.7551	36.9972	36.8039	36.9774	36.6169	37.1355	36.8004	36.7676	36.7999	36.8749	36.8406	36.8882	36.6955	36.8258	36.7857	36.9591	36.6238	36.4955	36.5936	36.4868	36.5758	36.5166	37.0703	36.6359	36.8834	35.9732	36.3297	36.0773	36.4476	36.7416	36.773	35.9115	36.1098	36.8753	36.364	36.3561	36.298	35.9505
B4DLN1	B4DLN1	#N/A	#N/A	B4DLN1	29.8898	30.4684	29.9602	30.4048	30.2945	30.7951	30.4875	29.9356	30.5596	31.0807	30.438	30.5896	30.5561	30.031	30.4154	30.7046	30.8654	30.6281	31.2697	30.4498	31.0443	30.7195	30.5831	30.1256	30.8103	30.4821	30.8094	30.4228	30.4991	31.2119	30.8333	31.0633	29.8662	30.3318	30.0636	30.9882	30.355	30.4637	29.4107	29.1741	30.3643	30.3257	30.9024	30.3389	29.9252
B4DLR8;P15559-3;P15559-2;P15559;H3BRK3;H3BNV2	B4DLR8;P15559-3;P15559-2;P15559;H3BRK3;H3BNV2	NAD(P)H dehydrogenase [quinone] 1	NQO1	NQO1	26.6399	24.812	27.1789	26.5215	25.6048	24.9871	23.6784	26.4949	23.098	25.6797	22.5487	24.3428	23.4126	27.2154	23.6014	25.0574	25.3738	26.0523	26.4605	26.1428	24.7845	26.1685	26.5576	26.2946	25.9259	26.8536	23.5427	26.3111	24.5036	22.5307	25.5944	26.495	25.9408	25.4689	24.4704	23.2963	24.3913	24.7607	23.7302	25.4911	22.4551	24.5516	23.7502	23.7018	24.8853
B4DR61;P61619;P61619-3;H7C1Q9;C9JXC6;H7C069;A6NK38;F2Z2C7;A6NIF9;C9JJV4	B4DR61;P61619;P61619-3	Protein transport protein Sec61 subunit alpha isoform 1	SEC61A1	SEC61A1	27.1779	26.7681	22.8702	27.1018	26.9984	27.6884	26.2563	26.7396	26.6606	26.2305	26.711	26.1485	25.9143	27.8462	25.0637	28.294	25.4091	25.8056	26.173	26.3799	27.2747	23.6954	25.6637	27.1952	23.8134	26.0639	24.5269	25.1782	25.4383	26.5828	25.8756	26.5482	27.9803	26.0228	26.7057	27.1053	25.5426	24.4675	27.4471	24.6755	24.3796	26.7447	26.7054	26.9798	26.3342
B4DR80;Q9Y6E0-2;Q9Y6E0;H0Y630;Q5JV98;Q5JV99	B4DR80;Q9Y6E0-2;Q9Y6E0;H0Y630	Serine/threonine-protein kinase 24;Serine/threonine-protein kinase 24 36 kDa subunit;Serine/threonine-protein kinase 24 12 kDa subunit	STK24	STK24	27.7795	27.9489	28.3328	29.0539	28.4265	28.654	28.3125	28.1515	27.9634	27.9123	28.4123	28.1295	28.5326	28.2156	27.795	28.1728	28.6646	28.043	28.2744	28.2904	27.9664	28.3999	28.7762	28.3011	27.4379	27.7918	28.0574	28.5712	28.295	28.1949	27.9993	28.2624	30.7161	28.2971	27.7825	28.4015	27.2817	28.173	28.6114	27.8425	28.7985	28.0806	28.8374	27.7925	27.8339
B4E1Z4;P00751;A0A0G2JH38;H7C5H1;P00751-2;C9JRT3;A0A0G2JHM4;A0A0G2JJ82;H7C526;F2Z3N2;A0A0G2JI59;C9JYQ5;A2ABG0;F8WCJ9;A0A0G2JJM0	B4E1Z4;P00751	Complement factor B;Complement factor B Ba fragment;Complement factor B Bb fragment	CFB	CFB	32.1624	30.8973	32.3344	32.7372	32.0296	31.1855	31.02	31.2916	31.0797	28.9821	30.3765	30.0557	30.5719	30.6443	30.2432	29.4683	29.771	30.908	31.2307	31.3938	29.996	30.2744	31.8372	30.8727	31.82	32.5277	31.7678	32.1054	31.7711	30.3702	31.0323	30.5872	32.3741	31.7237	31.7658	32.5479	31.7174	30.7176	33.4203	31.794	31.5333	32.0026	29.9871	32.6157	31.5541
B5MBW9;Q8WYQ3	B5MBW9;Q8WYQ3	Coiled-coil-helix-coiled-coil-helix domain-containing protein 10, mitochondrial	CHCHD10	CHCHD10	24.908	27.4935	28.7836	25.3861	25.0047	25.959	27.8583	27.0539	25.462	29.2252	29.1594	27.4482	28.793	24.3468	29.6478	24.4587	27.0897	29.3937	29.2075	29.4502	24.9414	28.9088	29.6467	28.8966	28.2299	28.248	29.3815	28.8248	28.6872	30.1518	29.7085	24.0872	28.1412	27.9827	28.8638	28.6385	28.0345	24.6388	28.5687	28.3195	28.8749	27.2548	27.6	27.9429	24.4442
B5MCD7;O43759-2;O43759;A2A283;F8WCE4;O43759-3	B5MCD7;O43759-2;O43759;A2A283;F8WCE4	Synaptogyrin-1	SYNGR1	SYNGR1	23.0125	24.4699	23.9139	23.0529	23.5183	25.2669	22.2439	23.8378	22.673	24.6511	24.8902	23.1259	26.3518	22.5295	23.8039	23.3424	26.1712	25.6326	25.4672	22.5631	25.5163	25.7099	24.0198	24.4165	22.8256	22.7885	24.6971	23.2982	25.1441	23.3918	22.0949	23.7723	22.7983	23.9396	23.7005	24.1333	22.9712	25.1675	26.2278	23.0525	25.4668	24.3332	23.65	22.2275	23.846
B5MCF8;P39210;B5MC53;E7EX18;G5E9F5;H0Y6M5;A8MPV4;F8WEL3;B5MC10;A8MTD3	B5MCF8;P39210;B5MC53;E7EX18;G5E9F5;H0Y6M5	Protein Mpv17	MPV17	MPV17	30.1892	30.1672	29.8195	29.8997	30.2365	30.7173	30.6455	28.8467	29.917	30.6401	30.4713	30.7734	30.5345	30.2049	30.5341	29.6419	30.2271	30.587	30.2223	30.2374	31.0643	30.5325	30.3355	30.0513	30.0616	30.8288	30.3004	30.32	30.1569	30.0264	30.6425	30.9867	27.6898	30.4757	27.4022	30.4515	31.1415	30.1655	29.6548	30.0046	30.1679	27.7478	25.0943	26.5697	27.9099
B5MCF9;O00541-2;O00541;B3KXD6;H7C267;H7BYY8	B5MCF9;O00541-2;O00541;B3KXD6	Pescadillo homolog	PES1	PES1	24.4707	18.4286	22.5731	19.3792	22.0476	20.8527	22.6503	24.1163	22.8387	23.6956	26.3807	22.3334	24.5687	23.5398	25.1598	25.7855	24.3298	26.0294	21.235	27.3069	21.9482	24.7918	23.9711	22.0348	25.289	22.9714	24.8322	21.8782	20.3651	24.1145	21.5602	19.9067	19.7085	23.7133	22.7295	20.2951	23.6274	24.5859	21.8033	24.24	25.0234	23.065	21.159	23.5879	24.3603
B5MCI0;H7BZZ8	B5MCI0;H7BZZ8	#N/A	SMTN	SMTN	28.9398	28.7787	28.7083	27.8454	28.0839	27.2322	28.4428	29.1782	28.4652	28.5402	28.2056	28.7622	28.0645	26.651	28.8952	27.5533	29.0345	28.9132	29.3194	27.9704	29.0775	28.7366	28.7802	28.137	29.2916	29.3219	29.2865	27.496	29.0771	29.193	29.0903	29.0157	29.0201	28.2257	29.8927	29.2069	28.3663	28.4124	27.839	28.4835	28.9491	29.4672	29.3563	29.2447	28.787
B5MD23;O75954	B5MD23;O75954	Tetraspanin;Tetraspanin-9	TSPAN9	TSPAN9	26.8353	27.0615	26.4203	25.1767	24.9548	25.2598	27.6765	24.7331	26.8994	26.473	26.8368	26.6211	25.2938	26.4568	25.4741	26.4787	26.5557	25.9972	25.3869	25.8542	27.2165	25.9834	26.5355	26.8301	25.2545	26.0056	26.885	27.2659	25.2829	26.699	27.2214	26.3383	26.5223	26.6846	27.4744	27.3655	27.1502	23.2172	25.8969	26.124	27.9399	26.7666	26.8539	23.6425	26.7791
B5MDF5;P62826;J3KQE5;F5H018;H0YFC6;B4DV51;A0A087X0W0	B5MDF5;P62826;J3KQE5;F5H018;H0YFC6	GTP-binding nuclear protein Ran	RAN	RAN	31.2827	31.6103	31.5188	31.8503	31.6664	31.4665	31.7574	31.1061	31.4383	31.2484	31.4575	31.1359	31.0846	32.2043	31.7575	31.7108	31.3746	31.3619	31.7069	31.6572	31.2715	31.3804	31.5688	31.5267	31.6547	31.3075	31.1411	31.6488	31.4239	31.3336	31.8429	31.2368	31.3011	31.2262	31.5037	31.6307	31.5313	31.456	31.5841	31.5798	31.7044	31.0132	31.3608	31.6706	31.1621
E7EW69;B5ME97;Q9P0V9;Q9P0V9-2;E7EX04;Q9P0V9-3;C9JEW2;C9JNR7;F5H1F2;C9JEQ7;F5GYV2;F5H1W3;F8WC85	E7EW69;B5ME97;Q9P0V9;Q9P0V9-2;E7EX04;Q9P0V9-3	Septin-10	SEPT10	SEPT10	27.8839	28.2736	27.8827	28.2583	27.9763	28.6301	27.9482	27.5722	26.7525	27.8601	27.1276	26.9597	28.0563	28.1607	27.6883	28.6538	27.7565	27.9193	27.8466	27.6181	27.7925	27.8041	27.7955	27.4655	27.5305	28.5012	27.1804	27.6741	28.5345	28.6781	28.6319	28.0202	29.6616	26.6592	28.6971	28.3317	26.2662	28.12	28.104	26.6816	27.6058	28.2859	28.0562	27.1066	27.4782
B7Z2R7;Q5T8D3-2;Q5T8D3-3;Q5T8D3;X6RDD7;Q5T8E0;A0A087X0B8;K7EM05;Q8NC06;Q8NC06-2;Q8NC06-3	B7Z2R7;Q5T8D3-2;Q5T8D3-3;Q5T8D3;X6RDD7;Q5T8E0	Acyl-CoA-binding domain-containing protein 5	ACBD5	ACBD5	23.186	27.7814	27.1748	26.4684	26.0445	29.9937	26.5536	27.9705	27.0355	26.6353	26.3988	27.4716	27.9044	27.7902	27.1845	27.04	26.2725	27.4054	27.4184	27.5527	27.3926	26.6356	26.9957	27.5535	27.053	27.1276	27.187	26.6312	27.9158	27.8621	26.9601	26.4809	23.9267	27.4855	27.0866	23.5266	22.8185	27.4005	26.9976	25.9765	27.2877	27.2927	25.8011	23.0083	23.6922
B7Z4W5;Q16773;Q16773-2;Q5T278;Q16773-3;Q5T276;Q5T277	B7Z4W5;Q16773;Q16773-2	Kynurenine--oxoglutarate transaminase 1	KYAT1	KYAT1	27.5131	27.66	27.5248	26.9958	27.5165	27.0302	26.8634	27.4624	27.0136	26.5673	27.5181	25.8267	26.9625	27.2262	26.4532	26.6836	28.0861	27.581	27.2653	26.7365	26.5642	27.5815	27.9238	26.6508	27.3137	28.3234	27.4691	28.2227	26.8311	26.9991	27.4317	27.3371	22.7081	27.2763	27.472	27.8121	26.8135	27.507	26.7384	26.0428	26.6436	26.3948	27.2682	27.0124	27.1193
B7Z964;Q14BN4-5;C9JA20	B7Z964;Q14BN4-5	Sarcolemmal membrane-associated protein	SLMAP	SLMAP	28.9053	28.0538	28.4789	28.2465	28.6677	28.9244	28.5552	28.44	27.9965	21.9622	28.5063	28.2985	23.8872	28.9124	28.2839	28.1957	28.5551	29.0421	28.3403	28.4293	28.484	28.545	29.0653	28.8815	28.9475	28.1382	29.2324	28.4262	28.7265	27.8	28.1418	28.4103	28.4947	28.6928	29.1712	28.1687	27.5276	28.9191	27.9299	29.0874	27.3788	27.7226	29.0794	26.4059	28.1959
B7ZBB8	B7ZBB8	Protein phosphatase 1 regulatory subunit 3G	PPP1R3G	PPP1R3G	23.4811	23.2541	24.0738	22.183	22.5282	23.4396	25.8166	26.5415	25.2356	25.958	25.5984	24.9122	23.053	22.7101	23.2321	24.1978	25.3517	26.5487	26.3258	25.3816	25.3	25.6839	24.7869	25.5556	26.312	26.2248	25.1407	26.0789	25.7629	26.9808	25.7041	22.9255	25.6746	25.6779	26.1167	26.5112	24.7152	25.3926	25.8596	25.7133	26.3802	25.8325	26.648	24.5402	23.685
B7ZC38;Q9NR46;B7ZC39;Q9NR46-2;F8WFB9;G5E9J1;H7C1Z6	B7ZC38;Q9NR46;B7ZC39;Q9NR46-2	Endophilin-B2	SH3GLB2	SH3GLB2	26.9634	26.7479	24.0258	26.6495	26.4588	27.7643	26.633	26.2547	26.0588	26.6984	25.7741	25.4915	24.7866	26.3202	25.7846	25.8917	25.2915	26.2765	26.058	25.7918	27.3304	25.8567	26.7953	26.1748	27.0356	25.6014	26.309	25.9651	26.0322	26.2699	25.9183	26.2198	25.2021	27.0821	27.2404	24.334	26.9704	24.4944	25.9675	26.1749	20.3966	25.9781	26.4224	23.8428	26.6663
B7ZL88;Q8N8Q8;Q8N8Q8-2;Q8N8Q8-3;Q8N8Q8-4	B7ZL88;Q8N8Q8	Mitochondrial inner membrane protein COX18	COX18	COX18	26.1255	23.0819	27.1906	26.1804	24.4476	22.9204	24.2133	26.2748	22.9736	24.4566	28.3835	28.04	27.1265	25.2407	22.7023	24.0215	24.7353	24.6005	28.5289	23.4903	28.2271	21.49	27.959	27.5635	26.1413	24.2888	23.7249	25.6943	24.3093	24.7966	21.634	25.7283	24.4616	25.0943	23.5178	25.9574	23.7451	28.1199	26.157	28.4295	23.7066	23.5521	23.3172	26.9588	26.8202
B7ZLQ8;Q17RY0-2;Q17RY0;E5RJM0;E5RFP2;Q17RY0-3;H0YBG1	B7ZLQ8;Q17RY0-2;Q17RY0;E5RJM0;E5RFP2;Q17RY0-3	Cytoplasmic polyadenylation element-binding protein 4	CPEB4	CPEB4	23.708	24.9521	24.8486	25.56	23.171	25.2763	23.8387	21.6284	24.8699	24.549	23.9519	23.7852	25.0859	25.8994	25.7368	24.1107	25.5719	23.1409	22.6364	25.1209	26.0519	26.093	23.915	25.7663	23.5233	24.5736	24.3764	26.2618	25.4612	24.7517	23.3863	22.383	25.1142	24.668	23.5755	24.4759	23.2297	23.9891	24.6739	24.7044	22.7811	23.8625	22.0282	24.9224	24.1335
B7ZM87;O75044;A0A075B7B5;A0A286YEY3;P0DMP2;P0DJJ0;Q5VZB4;A0A075B7C8;A0A075B7E6;A0A075B7E9;A0A087X1G6	B7ZM87;O75044;A0A075B7B5;A0A286YEY3;P0DMP2;P0DJJ0	SLIT-ROBO Rho GTPase-activating protein 2;SLIT-ROBO Rho GTPase-activating protein 2B;SLIT-ROBO Rho GTPase-activating protein 2C	SRGAP2	SRGAP2	22.6749	23.479	22.9391	30.1938	23.9512	22.1462	30.7836	30.5482	33.4427	31.6038	28.6415	31.2773	31.9872	30.6931	22.7708	32.9981	32.9994	31.7472	32.806	31.5105	24.8762	31.7478	33.8332	23.5701	30.399	30.9212	31.7831	22.6094	25.131	22.6294	23.2644	23.1417	27.0349	21.9037	30.0638	31.8875	35.2134	32.8035	23.794	31.8316	31.6996	31.5388	29.9989	23.2899	24.392
B8ZZ71;Q6ZP80;C9IYX5;Q6ZP80-3;Q6ZP80-2	B8ZZ71;Q6ZP80;C9IYX5;Q6ZP80-3;Q6ZP80-2	Transmembrane protein 182	TMEM182	TMEM182	24.9522	24.9403	26.9748	23.5384	25.2214	26.3613	28.5479	23.6063	23.4499	27.1543	24.5628	22.9699	26.5735	23.8232	26.4607	24.2531	26.5509	23.9235	23.9609	26.0534	28.0236	26.9698	23.674	27.7223	26.1784	26.3414	28.9604	22.9401	27.6757	27.7492	23.938	27.7431	26.5338	28.3625	27.4689	26.5038	24.1939	25.438	28.596	25.1962	28.1602	27.8511	27.976	27.0791	23.4566
B8ZZB8;Q96F85-2;Q96F85	B8ZZB8;Q96F85-2;Q96F85	CB1 cannabinoid receptor-interacting protein 1	CNRIP1	CNRIP1	22.8125	27.5363	29.5047	29.3265	28.1749	28.6141	28.8773	28.0093	27.4355	27.5535	28.1555	27.8365	27.5265	25.9805	23.0168	25.5794	26.3218	27.5511	22.1059	26.3336	26.9519	26.8126	27.616	26.2548	28.3242	24.8496	28.8213	27.923	27.7552	27.7478	28.0396	28.0528	28.1505	27.4629	28.4717	27.8139	29.4276	28.982	24.6601	28.427	28.4467	29.902	30.2339	30.6448	29.6812
B8ZZQ6;P06454-2;P06454;B8ZZA1;B8ZZW7;H7C2N1	B8ZZQ6;P06454-2;P06454;B8ZZA1;B8ZZW7;H7C2N1	Prothymosin alpha;Prothymosin alpha, N-terminally processed;Thymosin alpha-1	PTMA	PTMA	27.9769	27.188	27.9698	28.0754	27.5409	27.5895	27.0784	25.4976	27.2259	26.9012	27.094	27.0579	27.879	25.9509	27.565	28.6522	25.6809	27.6237	27.8972	27.091	28.01	26.9896	26.2345	27.731	27.5247	26.6934	27.477	27.1969	27.3224	27.0971	26.8134	27.3535	28.8175	26.7943	27.7652	26.5479	28.1579	27.7261	29.0424	25.62	24.0982	28.1647	27.9814	29.8609	28.9881
B8ZZV9;Q9H8M1-2;Q9H8M1;B8ZZX2	B8ZZV9;Q9H8M1-2;Q9H8M1;B8ZZX2	Coenzyme Q-binding protein COQ10 homolog B, mitochondrial	COQ10B	COQ10B	28.9847	28.1244	29.1161	28.6863	28.8569	28.7343	29.4607	27.1348	28.728	27.9917	29.377	28.0099	30.1321	29.2308	28.1589	27.9605	28.3302	29.7226	29.6414	29.0325	30.0936	28.8614	29.8419	28.7493	28.9617	29.1643	28.9662	29.1466	29.2576	29.0743	29.682	29.507	29.717	29.0754	29.4306	29.8643	28.7772	29.0512	28.2119	29.3088	29.8062	28.258	28.5327	27.6509	27.7818
C4AMC7;Q6VEQ5;A8K0Z3;A8MWX3	C4AMC7;Q6VEQ5;A8K0Z3	Putative WAS protein family homolog 3;WAS protein family homolog 2;WAS protein family homolog 1	WASH3P	WASH3P	25.3296	26.0582	26.2312	26.1131	25.468	26.1208	26.7464	25.148	25.8331	25.3277	26.3823	26.4544	23.9391	24.504	26.1393	26.0527	26.4763	25.3794	25.4116	25.4647	26.0893	25.3759	26.6471	26.1833	26.3535	25.7941	21.9792	26.5131	25.8953	26.4793	25.9113	26.0475	27.1386	24.751	26.2921	26.7712	27.0385	24.3419	24.7785	25.9372	25.4242	26.8003	25.8291	25.9837	24.8905
C9J0A4;P57723;C9JZY3;P57723-2;C9JTY5;C9J5V4	C9J0A4;P57723;C9JZY3;P57723-2;C9JTY5	Poly(rC)-binding protein 4	PCBP4	PCBP4	26.1686	27.1974	26.514	27.2328	25.4429	26.7255	26.805	23.363	23.8189	27.0041	22.7181	24.4239	28.2808	24.3824	28.8398	25.6884	26.5888	26.6299	26.2445	26.8147	26.1802	25.4699	25.9318	28.245	27.9753	28.3655	28.4087	28.1038	26.6044	27.6184	28.3039	26.5956	22.9729	28.3459	23.9033	28.5541	24.563	29.1152	27.4976	25.3048	27.8115	25.8683	22.9694	24.2727	26.6733
C9J0K6;P30626-3;P30626-2;P30626;B4DHQ6;E9PG82	C9J0K6;P30626-3;P30626-2;P30626;B4DHQ6	Sorcin	SRI	SRI	29.7383	29.4548	30.4848	29.8343	29.8401	30.1891	30.1503	29.8174	29.5091	30.3295	30.1682	29.7791	30.2217	29.9704	30.0364	30.2292	30.392	30.1651	29.9977	30.1781	30.3288	30.0721	30.0984	30.1607	29.7951	29.8884	29.9259	30.292	30.1718	29.9966	30.2958	29.9512	30.9584	30.3104	30.1743	29.9886	29.4489	29.6261	30.0701	28.2443	29.9464	29.7212	30.0562	30.7422	29.7838
C9J2H1;Q86UX2;G5E9D8;Q86UX2-2;A0A096LP62;Q86UX2-3;Q86UX2-4;H7C5A6	C9J2H1;Q86UX2;G5E9D8;Q86UX2-2;A0A096LP62;Q86UX2-3	Inter-alpha-trypsin inhibitor heavy chain H5	ITIH5	ITIH5	27.3561	26.43	24.7424	27.6942	25.8392	26.7752	26.8412	26.1815	27.2155	26.7874	25.4453	26.1142	25.2428	23.003	25.3067	27.9224	25.5804	26.6531	25.9647	25.1444	27.0806	26.8162	26.972	25.188	25.6714	27.6024	27.401	26.4849	26.9455	24.8332	27.4519	26.1621	26.597	28.847	26.1034	27.9602	26.0921	26.7312	25.9915	26.8019	26.064	29.3722	27.1881	22.7985	26.1003
C9J406	C9J406	#N/A	IMMT	IMMT	23.5223	27.2175	28.2398	26.8608	28.5867	28.2021	27.9166	30.5913	29.0098	29.5006	28.5852	29.8867	29.3554	29.7714	28.8192	28.2917	28.6233	28.7063	29.3331	28.9728	28.2997	27.845	27.9195	28.5127	27.5694	27.3445	27.5652	27.8953	28.5637	28.4948	28.6309	27.9653	24.6749	26.9694	26.3726	27.543	25.5235	27.2095	24.7597	28.2363	27.8996	29.0842	29.9385	28.9261	28.5187
C9J4Z3;P61513;M0R0A1;Q6P4E4;E9PEL3;G5E9R3;A6NKH3	C9J4Z3;P61513;M0R0A1;Q6P4E4;E9PEL3;G5E9R3	60S ribosomal protein L37a	RPL37A	RPL37A	26.5727	26.1579	25.4821	25.946	24.705	23.8691	25.2039	27.0454	26.7226	26.2355	26.9035	24.5763	27.7089	27.2742	28.079	27.4958	26.0438	28.1256	27.3253	26.6506	27.9052	26.8676	25.5104	27.3993	26.1208	25.8378	23.5363	26.1716	25.9039	25.2179	25.8057	25.8455	25.8653	25.0489	25.6381	25.6979	27.3077	28.6213	27.6413	27.2662	25.5825	24.0081	24.5202	23.9249	24.747
C9J7E8;Q9UL63-2;C9JWX9;C9JVL5;C9JXB0	C9J7E8;Q9UL63-2	Muskelin	MKLN1	MKLN1	28.7863	27.4103	27.8747	26.985	27.6789	24.6461	28.4712	22.8763	28.0492	25.6716	26.564	26.9293	26.2713	23.8709	27.3192	27.0131	24.7361	27.3181	25.854	26.161	22.2555	24.3158	24.0949	22.71	22.9867	24.7228	23.3505	25.1866	25.4685	25.4923	25.2286	23.9809	23.633	25.6221	24.2977	22.6359	24.4554	22.9906	25.0684	22.5456	24.4741	23.7799	23.3762	25.2346	25.394
C9JA28;Q9UNL2;Q9UNL2-2	C9JA28;Q9UNL2;Q9UNL2-2	Translocon-associated protein subunit gamma	SSR3	SSR3	25.8131	24.8928	24.1691	24.6287	24.2609	26.0417	22.4654	25.6024	25.2041	24.4305	25.2884	24.3905	24.5284	26.2565	25.9674	26.6274	23.5452	25.7741	23.562	26.2627	24.414	24.7377	23.8263	24.1421	24.7142	24.9371	22.6634	22.7478	25.9003	24.5806	24.3529	25.2221	26.2714	25.0656	25.8706	23.0535	23.5102	23.286	23.5444	24.632	23.8337	24.334	23.7422	25.4241	24.1868
C9JAX1;Q16595;A0A2R8Y5A1;Q16595-2;Q16595-3;H7C585;A0A2R8Y4G3;A0A2R8Y577	C9JAX1;Q16595;A0A2R8Y5A1;Q16595-2;Q16595-3;H7C585	Frataxin, mitochondrial;Frataxin intermediate form;Frataxin(56-210);Frataxin(78-210);Frataxin mature form	FXN	FXN	29.971	29.6031	30.4422	30.1163	30.2909	29.3595	30.0945	29.5633	29.8412	30.2932	30.1069	29.781	30.0565	30.1667	29.5884	29.9893	29.4877	29.6817	29.6053	29.4229	29.8796	29.5392	29.7207	29.8268	30.0746	30.1278	28.8913	29.5489	29.9403	30.0811	29.4411	30.1994	30.4864	29.9386	30.1937	29.0268	28.5746	29.4234	28.9642	27.2318	29.5693	30.0359	29.9544	29.8007	29.3468
C9JG97;C9JEH3;Q13685;H7C0R2;C9JTS3	C9JG97;C9JEH3;Q13685;H7C0R2;C9JTS3	Angio-associated migratory cell protein	AAMP	AAMP	23.928	23.7407	22.436	25.3587	24.7811	23.4678	23.7523	23.4496	23.6821	22.2718	21.8542	23.1795	22.2089	23.9987	24.9214	24.135	23.3309	24.3401	23.2169	24.8596	22.9977	23.3952	22.6467	24.2877	22.2875	22.8521	25.7339	24.0572	22.6357	22.9463	23.7506	24.0554	25.0336	23.9446	23.6562	25.0174	23.2639	23.4042	23.9555	23.3076	24.9417	23.1911	24.5072	24.5885	23.4377
C9JFE4;Q13098-5;Q13098;Q13098-7;A0A096LP07;A0A096LPJ3;A8K070;Q13098-6;J3QLT0;J3KSA5;J3KRJ4;J3QS88;J3KTB0;J3QQX0;J3QS84;J3QLE8;J3QL53;J3KRE8	C9JFE4;Q13098-5;Q13098;Q13098-7;A0A096LP07;A0A096LPJ3;A8K070;Q13098-6	COP9 signalosome complex subunit 1	GPS1	GPS1	29.5635	29.3507	29.3739	29.6267	29.5453	29.3023	29.085	28.5735	29.2822	29.7948	29.2752	28.7581	28.6753	29.368	29.6133	29.0029	28.9139	29.3221	29.4191	29.2701	29.6174	29.8117	29.8445	29.8234	29.7289	29.5878	29.2562	29.3664	29.2307	29.4036	29.1344	29.295	28.18	29.6277	29.6403	29.6506	29.6618	29.7375	28.8174	29.2991	29.4483	29.2969	29.4704	29.271	29.1129
C9JIF9;P13798;H7C1U0;H7C393;C9JLK2;H0YFE5;F8WEH5	C9JIF9;P13798;H7C1U0;H7C393	Acylamino-acid-releasing enzyme	APEH	APEH	30.3546	30.6262	30.6481	29.9983	30.4939	30.4252	30.59	30.664	30.3265	30.5208	30.603	30.4329	30.2771	30.309	30.6694	29.8668	30.481	30.375	30.6723	30.3695	30.7119	30.7053	30.3479	30.3705	30.6349	30.6419	30.6993	30.5222	30.4525	30.7311	30.6727	30.5625	30.2396	30.3851	30.7668	30.7209	29.9362	30.6375	30.2705	30.0274	30.6896	30.4565	30.2676	30.1651	30.1419
C9JJ19;P82930	C9JJ19;P82930	28S ribosomal protein S34, mitochondrial	MRPS34	MRPS34	27.77	28.4932	28.1214	27.8995	27.8083	27.9698	28.7255	27.9896	28.5132	28.8087	28.8594	28.6848	28.7135	28.1873	27.7784	28.6648	28.3982	28.2178	28.965	28.4133	28.0858	27.8618	28.6369	27.8643	27.8279	28.4441	28.2556	28.8189	28.741	29.0655	28.8986	28.9245	28.4021	28.5755	27.6089	28.8015	26.8941	28.5479	29.2016	28.3195	30.1799	28.5164	27.9686	27.2104	27.6174
C9JJN9;Q8N3P4-3;Q8N3P4;Q8N3P4-2;C9JPI1;C9JP71;C9JG07;F8WB24;C9JKL0;H7C322;C9JIA0	C9JJN9;Q8N3P4-3;Q8N3P4;Q8N3P4-2	Vacuolar protein sorting-associated protein 8 homolog	VPS8	VPS8	26.5545	26.4016	26.4327	25.9131	25.7642	25.3749	23.0458	26.1788	23.5514	24.6822	22.4558	26.0845	24.0819	24.9778	26.7523	24.6273	23.3202	24.8643	24.7306	24.5579	25.0447	23.9909	23.7356	24.9393	25.7777	26.3675	22.8388	28.4231	27.6428	27.1499	26.3298	24.4992	30.5402	25.0237	26.4218	26.8284	26.8591	26.0308	28.0931	27.4727	28.4522	25.0721	24.4091	25.3634	26.3892
C9JME2;Q9Y4F1;Q9Y4F1-2;H0Y783;M0QXT1	C9JME2;Q9Y4F1;Q9Y4F1-2	FERM, RhoGEF and pleckstrin domain-containing protein 1	FARP1	FARP1	27.447	27.5396	22.9777	26.8428	26.5203	27.3165	28.1714	23.1247	24.2135	23.6558	23.7122	22.7279	28.1252	27.3382	25.2495	25.028	26.1849	23.6079	25.886	22.679	26.0843	25.6668	25.4149	26.0142	25.413	24.5611	24.4596	26.8747	25.5102	26.8006	26.6019	24.6989	25.5739	26.4549	26.036	23.9999	23.1789	26.7411	27.2187	25.6499	25.9767	22.4539	25.2999	24.5619	27.046
C9JXB8;C9JNW5;P83731	C9JXB8;C9JNW5;P83731	60S ribosomal protein L24	RPL24	RPL24	29.0385	29.1237	28.9099	28.9754	28.4335	28.783	28.4058	29.5171	28.8911	29.1891	30.586	29.4904	29.6381	30.6285	30.5135	30.4687	29.6276	29.8103	28.7804	30.1375	30.331	29.4896	29.8128	30.2434	29.9387	29.7176	29.7314	28.5118	30.2424	29.9001	29.0846	29.2442	29.9222	28.8863	29.371	28.7133	29.5722	30.1169	29.2989	29.9966	29.6712	28.2213	29.08	27.7168	28.5283
C9JRZ6;Q9NX63;F8WAR4;A0A286YEX5	C9JRZ6;Q9NX63;F8WAR4	MICOS complex subunit MIC19	CHCHD3	CHCHD3	32.418	32.2021	32.5895	32.2897	31.9748	32.6801	32.4383	32.5972	32.2763	32.538	32.8887	32.9081	33.0283	32.3662	32.5187	31.8334	32.6033	32.9847	32.6129	32.6102	32.5352	32.4741	32.4467	32.9153	32.6289	31.6465	32.6106	32.501	32.7073	31.8558	32.3344	32.347	32.5276	32.5999	32.4289	32.0419	32.7128	33.2242	32.5725	33.5816	32.3099	32.8635	32.6525	32.9625	32.2784
D3DX19;O00501	D3DX19;O00501	Claudin;Claudin-5	CLDN5	CLDN5	23.8891	21.6019	23.7154	23.6133	22.3837	23.952	24.2474	23.354	21.517	21.9393	23.1346	25.57	23.5728	23.4481	20.9659	21.9132	21.6213	21.5135	23.2729	24.15	23.7128	22.548	22.5038	23.7198	22.6693	25.0108	24.0171	23.8412	24.5787	20.7243	21.019	23.224	22.0641	22.0427	21.3624	21.1874	24.1966	23.5206	24.1655	23.4259	21.584	24.0383	25.7249	24.6933	21.9612
D3YTG3;Q7Z7G0;H0Y897;Q7Z7G0-3;Q7Z7G0-4;Q7Z7G0-2;Q5JPC9;H0YEA0;H7C556;E9PPR9;H7C4T1;H7C4S3;H7C4X4;H7C5S3;H0YCP4;H0YCG4;H0YEL2;H0YF18	D3YTG3;Q7Z7G0;H0Y897;Q7Z7G0-3;Q7Z7G0-4	Target of Nesh-SH3	ABI3BP	ABI3BP	28.9964	31.662	29.1533	32.6322	31.4265	31.1375	30.2606	27.7868	28.5291	29.4332	28.7417	28.2904	29.7972	29.4206	26.1301	28.493	28.6124	29.8332	29.2483	27.7203	27.5222	28.9015	29.9448	28.0864	31.1553	30.7883	30.126	31.5853	31.1401	29.2517	29.762	29.6955	33.3625	29.0173	31.1377	31.2997	29.3477	28.8157	31.4774	29.7014	30.6375	29.9598	29.5823	31.8263	29.6955
D4Q8H0;Q9NYL2-2;Q9NYL2-3;C9J3F7	D4Q8H0;Q9NYL2-2;Q9NYL2-3	Mitogen-activated protein kinase kinase kinase MLT	pk	pk	30.3012	30.6709	30.7094	30.3998	30.2754	30.4185	30.8773	30.6875	30.3959	29.7911	30.1079	30.1147	30.1177	30.4131	30.9342	30.773	30.2276	30.3532	29.851	30.145	30.3579	29.7863	29.9436	30.47	30.5272	30.1285	29.6208	29.8547	30.3139	30.3082	30.2921	30.5894	30.4393	30.2064	30.7722	30.0473	29.7836	30.6794	28.7262	30.0984	30.1014	30.1057	30.6062	29.7308	30.4542
D6R934;P02746;A0A0A0MSV6;D6RGJ1	D6R934;P02746;A0A0A0MSV6	Complement C1q subcomponent subunit B	C1QB	C1QB	28.3957	28.1888	28.0077	29.5396	28.6326	27.8193	28.2728	28.4426	27.3761	23.8596	26.4464	26.501	27.8027	25.5847	25.6931	27.6919	25.8762	24.0653	23.3603	24.5391	23.4973	24.7323	27.1441	25.4596	28.0776	28.9187	27.8919	28.1194	29.4222	27.3755	26.8848	28.4122	32.0174	29.0799	29.5403	29.4873	27.3916	26.6227	30.4274	28.5935	27.3828	28.3151	27.1135	29.2118	28.3507
D6R9H7;E7EQ97;E7EPU7;P05496;Q06055;P48201;Q06055-3;Q06055-2;I3L0Y5	D6R9H7;E7EQ97;E7EPU7;P05496;Q06055;P48201;Q06055-3;Q06055-2;I3L0Y5	ATP synthase F(0) complex subunit C1, mitochondrial;ATP synthase F(0) complex subunit C2, mitochondrial;ATP synthase F(0) complex subunit C3, mitochondrial	ATP5MC1	ATP5MC1	26.7892	25.5472	25.5484	26.7288	26.302	27.0231	20.8314	27.2521	27.5788	27.3852	28.305	27.9198	28.1642	23.9127	26.8012	21.7016	24.3081	21.8986	27.4189	27.6395	27.1852	20.1228	23.6293	28.5728	27.5349	26.5226	25.5888	27.0144	23.4132	26.2532	27.2742	28.2403	23.7414	27.3709	27.4904	23.0632	24.897	27.9542	28.0833	22.382	15.637	27.6839	26.7661	25.1519	27.6123
D6R9Z7;P15954	D6R9Z7;P15954	Cytochrome c oxidase subunit 7C, mitochondrial	COX7C	COX7C	28.4699	28.9211	30.5458	28.6862	28.5878	28.2044	27.6757	29.7099	29.7537	31.1046	31.242	31.0587	30.3237	30.8232	29.8915	30.2033	30.425	31.3385	31.6941	30.6567	31.1017	30.8626	30.1046	30.419	30.3405	29.8099	31.0333	29.6119	29.3275	29.939	30.1326	29.7504	30.2323	29.2969	29.6776	29.1731	32.0729	30.6676	27.8979	31.8398	30.7296	30.4802	30.5115	30.5864	28.2721
D6RA88;D6RJ91	D6RA88;D6RJ91	#N/A	MYL5	MYL5	34.3863	34.6179	34.3938	34.6718	34.4725	33.7115	34.2868	35.018	35.5529	35.4559	35.1598	36.0041	35.625	34.8238	35.6864	35.547	35.4983	35.7542	35.7816	36.0536	35.6322	35.3106	34.7615	35.1391	34.4833	34.4605	34.7617	34.9614	34.4242	34.5227	34.5697	34.9378	34.4297	34.6759	34.7474	34.3947	34.7363	34.7546	33.3074	34.2159	34.9488	33.1949	33.4439	33.7251	33.353
D6RCD0;Q8NBQ5	D6RCD0;Q8NBQ5	Estradiol 17-beta-dehydrogenase 11	HSD17B11	HSD17B11	23.6603	23.9804	23.7661	23.2915	23.5348	23.9371	23.6522	24.3851	23.147	25.0988	24.096	23.8962	24.8249	25.002	24.5532	25.0549	24.2175	25.0625	24.8993	23.708	24.5996	24.5909	23.3754	24.7465	24.2598	23.8284	25.5133	23.7499	25.2262	23.8035	22.4746	24.2434	24.7025	25.4284	25.4812	25.1444	23.1619	24.9714	23.2859	24.8412	25.6484	24.3514	24.2552	23.6599	22.0493
D6RE79;D6RIZ4;D6RA47	D6RE79;D6RIZ4	#N/A	MFSD10	MFSD10	24.6705	25.0011	25.5215	23.5519	25.4497	25.7766	25.307	24.4651	24.9616	25.5547	25.8028	25.324	25.4404	25.6507	25.7996	26.0362	25.6455	24.8899	23.1096	24.739	24.8197	25.1015	25.8123	24.9232	24.4885	25.1722	24.8356	25.2901	25.4529	25.8533	25.1338	26.5955	25.8379	23.8179	26.292	25.5145	24.6926	25.2311	24.9052	25.2854	24.8309	25.8763	22.399	25.5395	25.0276
D6RGI3;D6RER5;Q9NVA2;Q9NVA2-2;D6RDU5;H0Y961;D6RDP1;D6R9Y6;H0Y9G8	D6RGI3;D6RER5;Q9NVA2;Q9NVA2-2;D6RDU5;H0Y961	Septin-11	SEPT11	SEPT11	30.4324	30.313	30.1399	30.355	30.55	30.4674	30.4892	29.9578	30.0221	29.6068	29.4712	29.6267	29.4833	29.556	29.4766	29.8032	29.7078	29.2213	29.7593	29.4379	29.864	29.3412	29.6088	29.9694	30.2481	30.256	29.913	30.1919	30.8745	30.0469	29.7683	29.7636	31.6745	30.4183	31.0948	30.2339	30.0814	29.8554	30.8248	30.2388	29.8601	30.2054	29.8799	30.5894	30.137
D6REX3;O94979;O94979-3;O94979-4;O94979-9;O94979-2;O94979-8;O94979-6;O94979-10;D6RHZ5;H7BXG7;O94979-7;O94979-5;H0YAB3;H0Y8V7;H0Y9K1;H0Y9T9;H0Y8W8;D6RE64;D6RCQ9;H0YAF5;D6RBT0;D6RHE8;H0Y9V3	D6REX3;O94979;O94979-3;O94979-4;O94979-9;O94979-2;O94979-8;O94979-6;O94979-10;D6RHZ5;H7BXG7;O94979-7;O94979-5	Protein transport protein Sec31A	SEC31A	SEC31A	28.9966	29.5385	28.6379	28.916	28.9038	29.6315	29.7205	29.1703	28.8168	28.7576	28.4097	28.5511	28.9482	30.1649	28.9125	29.7447	28.9692	28.9036	28.7376	28.8563	29.0496	28.9921	28.9256	29.4997	28.6881	29.3272	28.8032	29.0554	29.9373	29.4615	29.5743	29.4904	30.0637	29.2922	30.0435	28.8124	28.0708	28.3355	29.2392	29.3992	29.3093	29.3583	28.8129	28.7771	29.1154
D6RF35;P02774;P02774-3;P02774-2;D6RBJ7;D6RF20	D6RF35;P02774;P02774-3;P02774-2;D6RBJ7	Vitamin D-binding protein	GC	GC	33.3436	32.0611	32.3199	33.4319	32.8993	31.7613	31.8648	33.0891	31.8223	29.7839	30.8567	30.7992	31.5531	31.892	32.0328	31.8257	31.6526	31.9208	31.8372	31.9892	30.2016	31.7599	32.7303	32.0214	32.0259	33.2808	33.3193	33.6385	31.688	31.6565	32.6074	30.9359	32.8921	32.9437	32.6941	33.4995	33.4914	32.5528	34.649	32.9617	33.2355	33.2607	31.4827	32.907	32.7657
D6RF48;Q9P2W9;D6RC71	D6RF48;Q9P2W9;D6RC71	Syntaxin-18	STX18	STX18	26.0825	26.0001	25.0552	25.2726	26.4595	26.4173	26.0479	26.7776	24.4834	22.4603	26.2383	23.5118	26.5761	26.3544	26.5727	23.7614	23.0185	25.7979	26.1506	23.0487	26.6934	24.015	23.1394	26.8688	26.3633	27.1091	26.4915	21.38	26.0878	26.6594	25.996	26.1077	25.5573	26.2728	24.7583	21.93	27.8771	26.8599	25.9272	25.4237	26.4058	23.7619	24.2851	24.5901	25.8975
D6RGG3;Q99715;Q99715-4;A0A087X0A8;Q99715-2;H0Y4P7;H0Y991	D6RGG3;Q99715;Q99715-4;A0A087X0A8;Q99715-2	Collagen alpha-1(XII) chain	COL12A1	COL12A1	27.9419	32.3192	30.8861	31.3944	31.0508	30.7101	30.055	25.2837	23.8058	28.3516	27.4693	29.2221	29.8781	27.2936	24.5736	29.034	25.098	28.759	27.9375	27.2596	26.3415	26.6901	29.6914	26.6096	29.2638	29.5368	30.6683	30.6203	30.2104	27.6339	29.68	28.1367	31.462	29.4125	30.4012	31.864	24.3504	25.0471	31.1832	30.3899	28.9203	25.0401	30.2188	27.3016	29.8852
D6RIA3	D6RIA3	#N/A	C4orf54	C4orf54	20.8728	27.2388	24.1686	24.9278	24.5127	24.6747	28.6807	30.5339	24.8846	23.9567	26.6588	27.6707	26.7776	31.2031	32.559	31.3213	26.7905	26.1191	26.8664	30.5212	23.848	23.9907	26.6476	30.9309	26.159	26.3431	23.9158	23.887	28.5795	24.4437	23.8472	24.1247	23.5982	23.3591	24.3772	23.8046	24.9879	28.2765	27.3271	28.4674	23.7437	21.5418	23.4225	24.2599	24.9593
E3W994;J3KR49;A0A0U1RQI6;O75122;B3KR06;E7ENG2;O75122-2;D6RBU8;C9J668;H7C5M8;H7C4X8;H7C4I5;H7C4M5	E3W994;J3KR49;A0A0U1RQI6;O75122	CLIP-associating protein 2	CLASP2	CLASP2	24.337	25.241	25.0887	23.2299	23.2793	25.3725	24.8285	25.6203	23.1592	22.6262	23.7962	22.4282	22.597	23.6672	25.8139	24.902	24.0132	24.7321	25.233	24.0106	25.5596	21.6314	24.7465	22.5731	25.6262	22.5587	24.3958	22.9473	24.9841	25.6472	25.4463	26.3321	25.1751	25.3979	23.1275	25.5464	23.6907	23.021	23.9032	23.232	24.7964	23.7485	26.0242	23.7102	25.8869
E5RGX5;Q93045;Q93045-2;E5RIR6;E7EVN3;Q9H169-3;Q9H169;Q9H169-4;Q9H169-2	E5RGX5;Q93045;Q93045-2	Stathmin;Stathmin-2	STMN2	STMN2	25.5488	24.6781	25.6858	26.6546	26.3615	26.3804	25.4529	25.4318	25.4947	24.3237	25.1517	24.9427	24.138	26.0415	22.7937	25.5125	24.1488	22.7603	24.4638	24.9657	23.7097	24.4051	24.979	25.5924	25.4595	24.9937	25.2482	25.0953	23.4243	24.1517	24.2008	23.9988	25.6106	24.423	24.0154	24.6078	26.0462	25.1701	24.9134	25.424	17.4695	24.832	24.8628	27.0638	24.4677
E5RIM7;O00244;E5RGN3	E5RIM7;O00244;E5RGN3	Copper transport protein ATOX1	ATOX1	ATOX1	27.4179	26.5178	27.4529	27.6739	28.0161	28.2046	28.0572	23.2919	27.5646	27.0186	27.0594	26.6534	26.4671	27.1187	26.2281	26.5602	26.7468	26.9669	27.4192	27.5458	26.392	26.8093	27.1949	27.6034	27.2646	25.3257	27.9116	26.8112	27.8217	25.6365	27.4389	23.105	27.5278	27.2712	27.8072	27.4901	27.0364	27.3289	27.192	26.2436	27.5213	27.963	27.8272	28.6095	27.717
E5RIW3;E5RJD8;O75347;E5RHG6;O75347-2;E5RIX8	E5RIW3;E5RJD8;O75347;E5RHG6;O75347-2;E5RIX8	Tubulin-specific chaperone A	TBCA	TBCA	30.3253	29.9534	30.1865	30.1713	30.0358	30.1933	29.7384	29.2032	29.2155	29.2268	29.1365	28.8236	29.4852	30.1453	29.7732	28.9647	29.559	29.2684	29.7583	29.5889	29.7794	29.4016	29.4653	29.9871	29.6993	29.5521	29.5303	29.9014	30.0752	29.8211	29.4233	29.7924	29.5259	30.0148	29.5924	29.6463	29.4047	30.0238	30.2349	29.1252	29.432	29.6035	29.6013	29.8908	29.7222
E5RK69;H0YC77	E5RK69	Annexin	ANXA6	ANXA6	26.8028	26.3452	26.3701	26.0856	26.16	26.1069	25.6413	25.8518	25.9779	26.3606	25.4695	26.0384	25.1423	24.658	24.6717	26.5916	23.9873	25.3744	25.6695	23.7002	25.5711	23.8273	24.417	25.8799	26.3693	25.1792	26.4173	24.6277	26.9673	26.498	25.5691	25.6884	26.9303	26.4942	26.1587	24.0824	24.9583	22.4498	26.5697	26.7114	25.1693	26.3255	26.527	26.6798	26.4792
E7EM64;Q7L5N1;H7C3T0	E7EM64;Q7L5N1	COP9 signalosome complex subunit 6	COPS6	COPS6	29.8737	29.8534	29.5172	29.5717	29.4221	29.7814	29.9045	30.1628	29.8283	29.9871	30.0316	29.7616	29.2355	29.3376	29.8101	29.6424	29.5398	29.9611	30.3258	29.6769	29.9449	29.6191	29.5216	29.4787	29.5779	30.1377	29.9739	30.0952	29.3866	29.7739	29.7313	29.8326	30.0683	29.8235	29.891	29.4365	29.7452	29.2517	29.5618	29.506	30.0372	28.97	29.4954	28.9854	29.0589
J3KMY5;G3V3E8;E7EMS2;G3V3D1;P61916;H0YIZ1;G3V2V8;P61916-2	J3KMY5;G3V3E8;E7EMS2;G3V3D1;P61916;H0YIZ1;G3V2V8;P61916-2	Epididymal secretory protein E1	NPC2	NPC2	22.6823	25.9125	26.2471	26.1501	27.1211	25.1712	26.8848	25.4927	27.2685	24.7415	23.0095	27.0198	26.1604	27.5373	25.9398	26.9981	25.1322	27.3224	27.444	26.0704	27.6553	24.3712	26.5165	26.2179	25.2391	26.6014	25.3814	23.4053	26.9331	24.1566	25.6873	26.0098	24.0674	27.7905	22.324	23.3737	27.5945	26.4353	22.1853	24.7616	25.7459	23.4851	27.4974	26.8564	26.9142
E7EN65;P15502-2;P15502-1;P15502-4;E7ENM0;F8WAH6;P15502-13;P15502-10;P15502;P15502-9;P15502-7;P15502-6;G3V0G6;P15502-5;P15502-12;B3KRT8;E7ENW7;E7EWS8;E7EN51;H7C3K0	E7EN65;P15502-2;P15502-1;P15502-4;E7ENM0;F8WAH6;P15502-13;P15502-10;P15502;P15502-9;P15502-7;P15502-6;G3V0G6;P15502-5;P15502-12;B3KRT8	Elastin	ELN	ELN	29.4962	31.7261	31.7878	30.6656	31.9175	32.7483	30.3319	22.9236	25.5502	28.6007	29.662	27.9968	29.2037	26.8007	24.3545	25.7499	26.0815	28.2871	28.4253	27.5889	25.4508	25.5713	27.6306	28.4796	28.7049	31.896	29.631	30.0477	34.2435	32.1577	29.9033	34.9498	34.6135	30.4595	33.7922	30.0289	26.2908	29.4097	30.7934	32.7493	26.214	31.8153	29.2598	33.3185	30.6834
E7ENL6;P12111-4	E7ENL6;P12111-4	Collagen alpha-3(VI) chain	COL6A3	COL6A3	26.2976	26.0531	27.0328	27.8156	26.9889	26.0634	26.4446	26.2802	26.4842	26.4534	27.9749	27.9825	28.1572	26.8713	25.8387	25.766	26.3154	28.3211	28.5805	25.4761	28.3615	28.1269	27.5095	27.1599	27.6587	27.0539	26.8873	26.5793	26.6144	24.7363	25.0046	25.5482	28.4276	26.8045	27.5354	26.6861	28.4693	26.6248	29.2157	28.5509	27.4055	26.8441	26.6123	26.8614	27.4057
E7EPN9;Q9Y520-4;Q9Y520-5;Q9Y520;Q9Y520-7;Q9Y520-6;Q9Y520-3;Q9Y520-2;H7C5N8;A0A2R8YET2;A0A2R8Y7F4;A0A0A0MS30;A0A2R8Y424	E7EPN9;Q9Y520-4;Q9Y520-5;Q9Y520;Q9Y520-7;Q9Y520-6;Q9Y520-3;Q9Y520-2	Protein PRRC2C	PRRC2C	PRRC2C	23.9568	24.8245	23.0938	23.4029	23.772	24.6683	24.6457	26.3638	25.8158	25.1164	26.0785	25.3462	24.8974	25.9128	23.5208	26.0431	24.7335	25.3363	23.9059	24.1933	21.8867	23.3961	26.2473	24.0937	22.7905	25.6139	25.8859	25.7396	23.6145	21.638	25.8758	23.6351	23.5069	24.0575	23.9368	25.1462	23.54	23.3879	23.0571	26.3142	23.1625	22.7334	23.6267	23.6608	23.422
E7EPS8;P28827;P28827-2;J3QRB4;Q49AC9;J3KRV2;J3QLI4;J3KT55	E7EPS8;P28827;P28827-2	Protein-tyrosine-phosphatase;Receptor-type tyrosine-protein phosphatase mu	PTPRM	PTPRM	28.7141	28.1838	26.7374	26.4223	27.1192	27.3071	27.2589	27.4033	27.3449	27.5552	28.3434	27.4477	27.0224	27.2579	27.3889	27.1393	28.5972	28.0675	28.1029	26.5339	27.7385	27.6523	26.4406	27.6255	27.1509	27.5237	27.6516	28.5181	27.0359	28.4724	28.222	27.4996	25.8781	27.966	27.4729	27.5029	26.6642	27.9328	26.4223	27.7405	28.4788	27.5182	27.2774	27.7655	27.1259
E7EPT4;P19404	E7EPT4;P19404	NADH dehydrogenase [ubiquinone] flavoprotein 2, mitochondrial	NDUFV2	NDUFV2	33.566	33.8485	33.8283	33.1618	33.3431	33.3063	33.2905	34.007	33.8051	34.158	34.1927	33.5832	34.0183	34.0097	33.6867	33.8623	34.4885	34.1479	33.8888	33.5307	34.0252	33.8236	33.8708	33.8431	33.2014	33.6707	32.3879	33.3561	33.6537	34.2467	34.1216	34.1692	33.8793	33.6761	34.2405	33.7545	33.454	33.3836	32.3778	31.3106	33.4958	34.1727	34.5044	34.1815	33.186
E7EPV7;P37840-2;P37840;D6RA31;H6UYS7;P37840-3	E7EPV7;P37840-2;P37840;D6RA31;H6UYS7;P37840-3	Alpha-synuclein	SNCA	SNCA	26.868	27.0166	29.4839	29.469	28.272	28.5241	27.2744	26.4489	23.8096	22.5528	25.1278	25.8582	26.7762	24.5287	26.2922	24.7876	25.5123	25.5423	25.6671	24.8193	26.674	25.2757	25.8355	24.557	26.9854	25.5384	25.3598	26.9998	27.3807	25.6051	26.4056	25.272	25.9695	25.6198	26.8449	25.4275	24.9039	27.7856	29.6941	26.7112	28.0124	27.19	27.0284	27.0281	27.6431
E7EQ12;D6RC54;D6RAA8	E7EQ12	#N/A	CAST	CAST	27.4252	26.6292	27.5141	26.3129	26.392	25.9037	25.8992	26.4484	25.9832	26.0015	25.8169	26.2355	26.9079	26.336	26.5209	25.7826	27.3585	27.0717	26.2361	26.6688	27.6854	26.493	26.9025	26.4373	26.9919	27.421	27.0783	26.8176	26.3431	26.6248	27.751	27.2667	28.2143	27.097	28.1375	27.281	27.4069	27.0875	26.7131	24.8003	26.7767	27.6297	28.804	26.8064	26.5608
E7EQ61;Q9GZZ9;E7EWE1;Q9GZZ9-2;C9J5W5;C9JRV9;C9J0F6	E7EQ61;Q9GZZ9;E7EWE1;Q9GZZ9-2;C9J5W5;C9JRV9	Ubiquitin-like modifier-activating enzyme 5	UBA5	UBA5	27.4267	27.2584	27.1251	26.7665	27.0354	27.1445	27.4647	27.5147	27.5401	27.4499	26.8281	27.4332	27.5712	27.6263	27.3232	27.2804	26.5567	26.9958	27.9612	27.2586	27.1562	27.3598	26.7593	26.7809	27.669	26.8932	27.0066	27.3032	26.7434	27.3089	27.7481	27.2452	27.6043	27.8127	27.5882	27.2031	26.5985	24.8041	27.2238	27.5317	27.6311	26.9009	27.5184	27.2796	26.9204
E7EQR4;P15311	E7EQR4;P15311	Ezrin	EZR	EZR	32.5661	32.5226	32.759	32.6345	32.6388	32.362	32.3445	32.5385	32.4637	31.8544	32.2461	32.5078	32.3977	32.62	32.4555	31.8704	31.7649	32.2996	32.1823	32.3168	32.3389	32.5395	32.3065	32.4743	32.4712	32.028	32.4924	32.2871	32.05	32.2932	32.0191	31.931	32.0702	32.2947	32.2871	32.0466	33.0056	32.5384	32.3278	32.3629	32.8482	32.3659	32.5495	32.8552	32.6366
E7ERI8;E7EW49;O75122-3	E7ERI8;E7EW49;O75122-3	CLIP-associating protein 2	CLASP2	CLASP2.1	25.7109	26.5087	27.0982	26.5561	26.0253	26.2146	25.2585	27.6264	25.8613	23.4611	25.1852	26.2893	26.2059	26.7383	28.08	26.3922	27.0931	26.3886	26.457	26.4959	27.0399	27.1661	27.3448	26.2698	26.5074	25.9646	26.7917	26.4412	26.1983	25.9022	26.9709	27.265	25.136	26.5422	25.1782	26.2106	22.7979	26.0616	26.8043	26.5173	26.9099	23.1966	25.6981	24.4952	26.3108
E7ERK9;Q9UI10;A0A087WW69;F8W8L6	E7ERK9;Q9UI10	Translation initiation factor eIF-2B subunit delta	EIF2B4	EIF2B4	26.5014	27.1825	26.4924	27.1231	27.3908	26.2556	26.8223	26.4548	27.0612	26.8501	26.6554	26.6745	27.8512	27.6158	25.8653	27.6113	27.498	27.5411	26.6154	27.5231	26.7672	26.6327	25.764	26.7291	27.0024	27.3046	27.4251	26.7861	27.2049	27.7486	27.574	27.4324	26.4599	27.4897	27.134	27.0951	24.3242	27.2832	26.393	26.79	27.0971	26.3092	24.7995	23.0638	25.9298
E7ESC7;B4DVN3;Q7L5Y9;B4DQT1;Q7L5Y9-3;Q7L5Y9-2;D6RE80	E7ESC7;B4DVN3;Q7L5Y9;B4DQT1;Q7L5Y9-3;Q7L5Y9-2	Macrophage erythroblast attacher	MAEA	MAEA	24.9195	22.2615	26.7924	26.8678	24.1839	23.3099	27.7309	28.9222	24.3845	23.2669	23.845	24.9135	26.5748	28.6874	29.4963	26.0083	22.6665	28.9503	27.3204	25.5129	29.4299	28.9828	29.6281	27.9639	27.7214	23.855	25.1663	24.2751	27.4698	26.4127	24.2023	26.5459	29.0186	29.2576	29.2073	29.1522	22.5053	22.343	23.3439	26.8776	29.3164	28.2708	28.7082	26.6863	26.5949
E7ESL0;J3KQY1;Q9NWU5;Q9NWU5-2;Q9NWU5-3	E7ESL0;J3KQY1;Q9NWU5;Q9NWU5-2;Q9NWU5-3	39S ribosomal protein L22, mitochondrial	MRPL22	MRPL22	26.8593	27.3902	22.2047	24.7668	27.3437	26.6118	26.5868	27.1677	26.9539	27.1525	25.9146	26.7683	27.4317	26.9351	26.1316	27.0046	27.1318	26.7645	26.9999	26.1004	26.9402	26.8688	27.3601	25.7425	26.1853	27.105	26.7442	26.8365	27.7524	27.48	27.267	27.4677	26.4332	25.298	26.9756	26.6064	25.488	26.7619	26.7821	27.3806	27.1883	26.5406	27.3912	26.1854	26.0337
G3XAM2;E7ETH0;P05156	G3XAM2;E7ETH0;P05156	Complement factor I;Complement factor I heavy chain;Complement factor I light chain	CFI	CFI	28.5816	27.7769	27.5553	29.9817	29.0771	27.279	28.0864	28.4563	27.4126	25.0329	25.2825	26.242	26.5384	26.7939	27.4034	27.3273	26.5225	27.2404	27.651	27.663	25.663	27.2244	28.5347	26.2089	27.7679	29.3851	28.0838	27.8828	27.451	25.8883	28.1891	24.2437	29.1969	28.2244	27.7482	29.8043	27.0406	26.8485	29.5706	28.2896	28.3074	28.7462	25.1193	28.5409	28.9663
E7ETU5;F6Y5H0;P29558-2;P29558;E7EPF2	E7ETU5;F6Y5H0;P29558-2;P29558	RNA-binding motif, single-stranded-interacting protein 1	RBMS1	RBMS1	25.1706	22.9736	22.9809	24.8423	23.0674	24.9743	25.3529	26.2515	24.5685	26.162	24.4153	24.8761	26.0845	26.5082	24.9453	26.2129	25.026	25.0443	24.941	24.2835	23.7046	23.312	25.4148	22.5541	24.3117	24.9849	24.9885	23.245	25.8324	26.0598	24.1029	24.6887	24.0873	26.133	22.6929	22.9631	24.0761	25.2883	24.1136	23.3754	21.7584	25.3413	23.3996	25.5847	23.2392
E7EUU4;Q04637-8;E9PGM1;Q04637-7;C9K073;C9J2Z7;H7C044;C9JHW9;H7C0V6;C9JIH5;C9JWH7;C9J556;C9JWH9;REV__Q8NEG2-2;REV__F5H7J8;C9JSU8;C9JWW9;REV__Q8NEG2;REV__C9JQZ6;REV__J3KQX6	E7EUU4;Q04637-8;E9PGM1;Q04637-7	Eukaryotic translation initiation factor 4 gamma 1	EIF4G1	EIF4G1	30.0898	30.3065	30.2255	29.8374	30.2173	29.9347	30.041	30.5851	30.2271	29.9546	29.9218	30.0178	30.0615	31.0212	30.9199	31.0076	30.3202	29.8187	30.1	30.6834	30.1407	30.1311	30.1558	30.5853	30.1288	30.0902	30.0808	30.2099	30.0514	30.2016	30.496	30.4372	30.4269	30.082	29.983	30.2412	29.7558	30.119	29.9121	29.7673	30.1435	29.744	30.522	29.7926	30.0397
E7EV01;O15484;A0A3B3IRX8;K7EP62;E9PS73	E7EV01;O15484;A0A3B3IRX8	Calpain-5	CAPN5	CAPN5	27.3939	26.4827	24.5018	22.4065	27.4045	24.9797	23.4591	27.5743	24.9736	22.0722	24.2353	29.1686	23.7742	23.6029	24.7639	27.6942	24.7174	24.0293	23.6306	22.7345	23.3944	29.8666	28.8832	22.1731	24.3734	28.4273	28.1163	27.4271	20.1006	27.7971	23.691	27.6867	29.3843	28.6617	26.366	26.7889	28.1766	23.8939	22.5942	22.839	23.5103	23.6082	22.8878	27.9756	22.3728
E7EVA0;P27816-4;B5MEG9;A0A0J9YW37;A0A0J9YVV8	E7EVA0	Microtubule-associated protein	MAP4	MAP4	34.3632	34.5679	34.5005	34.502	34.2775	34.37	34.4304	33.8133	33.7228	33.5759	33.2569	33.8677	33.6824	34.0225	33.9005	33.0787	33.1464	33.9155	34.0159	33.8027	33.2402	33.8349	34.0833	34.0429	34.0954	33.8566	33.7403	34.0028	34.3591	33.6974	33.9976	34.0524	34.2078	34.0183	34.4276	33.9149	33.7052	33.8003	33.9671	33.7129	34.0826	34.0902	34.8026	34.1198	34.5557
E7EVJ5;Q96F07-2;Q96F07;E7EW33;A0A087WWZ1;A0A087WTQ3;A0A087WVE1	E7EVJ5;Q96F07-2;Q96F07;E7EW33	Cytoplasmic FMR1-interacting protein 2	CYFIP2	CYFIP2	25.0556	26.3218	26.048	26.3516	26.6106	26.4926	26.151	25.6206	26.2647	26.5647	26.5703	26.0937	25.3526	26.944	25.9116	26.5103	25.9922	26.1459	25.335	26.6749	25.5212	26.225	25.7006	23.2022	26.5169	26.2109	25.1562	25.5583	25.1438	25.4849	25.1232	25.2226	24.8497	25.7205	24.0485	26.12	25.0872	22.9454	23.8514	26.7443	25.2372	25.2878	23.3003	23.3161	24.9382
E7EW31	E7EW31	Proline-rich basic protein 1	PROB1	PROB1	28.78	29.1385	29.8942	28.7711	29.1415	28.7956	29.2551	29.7575	29.3642	29.7423	28.3391	29.2039	29.0958	29.1309	29.3816	29.2258	30.2801	29.6522	29.5033	29.283	28.2861	29.983	29.3147	29.3906	28.7172	29.7815	29.8026	28.7115	29.6412	29.891	29.9937	29.8146	26.0527	29.9596	28.417	29.9677	29.0881	29.2411	28.1743	28.953	29.2775	29.6038	28.886	28.5978	28.8975
E7EWH9	E7EWH9	#N/A	MYOM2	MYOM2	29.6039	24.7286	23.1339	29.2635	29.0654	24.6545	27.8278	26.7794	28.2176	29.3957	27.2829	27.289	24.5382	29.185	25.7543	25.2354	23.9048	28.2061	27.8426	23.6444	23.4558	29.0802	29.5322	23.5897	27.291	23.27	24.2193	26.1727	28.5292	28.9131	28.0686	24.5052	24.5779	27.751	29.2336	24.2835	28.3709	23.6317	24.1979	29.0771	23.6922	26.598	30.3792	30.7419	23.8817
E7EX17;P23588;P23588-2;F8VX11;F8VP89;F8VSC7;F8W0K0;F8VYE9;F8VRU1	E7EX17;P23588;P23588-2;F8VX11	Eukaryotic translation initiation factor 4B	EIF4B	EIF4B	28.3024	28.6337	27.7314	28.7247	27.4754	27.9581	27.5129	28.7621	28.3532	26.9626	27.1519	28.4653	27.4136	29.0047	28.7116	28.4795	27.6606	27.7383	28.0535	28.0256	27.3581	26.9661	27.5671	27.9066	28.3455	28.0851	27.9027	27.1613	28.1689	27.3511	27.1281	26.9291	28.319	28.1745	27.6335	26.5048	28.2074	27.4649	29.9316	27.597	27.6773	29.094	28.8272	29.928	28.5675
E7EX90;Q14203-3;Q14203-4;Q14203-6;Q14203;Q14203-5;Q14203-2;Q6AWB1;E7EWF7;C9JJD0;C9JZA4;C9JTE5;C9JJN7;C9J1B7;C9JKG6;E9PCY0;C9JUI8	E7EX90;Q14203-3;Q14203-4;Q14203-6;Q14203;Q14203-5;Q14203-2;Q6AWB1	Dynactin subunit 1	DCTN1	DCTN1	31.7175	31.667	31.662	31.45	31.6141	31.4652	31.5341	31.536	31.6545	31.7695	31.1692	31.6163	31.3493	31.7071	31.3608	31.6781	31.6118	31.6813	31.3344	31.372	31.4655	31.3209	31.2456	31.5693	31.4687	31.6117	31.9642	31.5645	31.5489	31.6656	31.6575	31.5065	31.9831	31.6884	32.0616	31.7453	31.2939	31.3423	31.0413	32.1088	31.7802	31.292	31.4717	31.0478	31.6242
E9PAV3;F8VZJ2;H0YHX9;Q13765;F8W0W4;F8W1N5;F8VNW4;F8VZ58;Q9BZK3	E9PAV3	Nascent polypeptide-associated complex subunit alpha, muscle-specific form	NACA	NACA	32.9405	33.1581	33.3473	32.7312	33.0817	32.9443	32.9065	33.0772	32.792	32.9112	32.7381	32.9172	32.6848	33.2542	33.1603	32.8935	32.9014	33.0167	33.1352	33.0897	32.8904	32.6363	32.7262	33.2679	33.0801	33.1364	32.8107	33.0615	33.5076	33.2082	33.5559	33.357	33.5316	33.2696	33.5027	33.0222	32.253	32.7782	32.2987	32.6446	33.0311	33.4146	33.5637	33.0996	32.9911
E9PB61;Q86V81	E9PB61;Q86V81	THO complex subunit 4	ALYREF	ALYREF	29.8752	29.1869	29.2771	29.3066	29.2965	29.4014	28.7519	29.2142	28.662	29.1191	28.1094	28.1201	28.2652	30.2492	29.405	29.0735	28.5877	28.5311	28.6629	28.4354	28.199	28.593	28.7887	28.621	28.8151	28.9366	29.0551	29.1555	29.5649	29.4346	29.2439	29.6134	29.7728	29.4837	29.5306	29.2936	29.0786	28.653	29.0549	29.4303	28.8075	29.5093	29.2424	29.2931	28.8588
E9PBP6;P55157;D6REL9;P55157-2	E9PBP6;P55157	Microsomal triglyceride transfer protein large subunit	MTTP	MTTP	24.2822	23.4711	24.98	24.4574	23.9484	26.8494	26.5467	23.1936	22.6216	24.1658	22.5727	22.4021	25.4138	25.7333	24.0105	24.4883	24.8587	28.6552	27.7072	25.8025	23.4824	23.1461	24.0494	22.7446	23.8958	23.5897	23.9467	26.0851	26.6183	23.9041	25.1684	23.2369	25.3305	27.1574	24.4294	26.2561	24.5347	25.4134	21.598	25.7845	25.9819	22.4841	24.1883	26.2321	24.9781
E9PC69;Q7KZI7-15;Q7KZI7-16;Q7KZI7-14;Q7KZI7-13;E7ETY4;F5H4F6;F5H6N2;K7EK17;K7EKG8	E9PC69;Q7KZI7-15;Q7KZI7-16;Q7KZI7-14;Q7KZI7-13;E7ETY4	Serine/threonine-protein kinase MARK2	MARK2	MARK2	24.1932	23.5399	24.1639	22.5476	23.1168	23.187	20.5817	23.7223	23.7989	24.3707	25.7192	23.7866	23.0864	25.6519	23.8202	22.9428	22.1201	25.6015	23.9862	23.9768	24.1302	22.7623	25.8142	23.3051	22.6134	24.035	20.7777	20.8258	25.4585	22.1312	25.0582	20.6352	23.9089	21.0513	26.0123	20.1216	23.3283	23.1715	23.6586	22.9819	23.4868	23.613	24.839	24.4221	23.1349
E9PC87;O94876-2;O94876;Q6N039;D6RH19	E9PC87;O94876-2;O94876;Q6N039	Transmembrane and coiled-coil domains protein 1	TMCC1	TMCC1	23.0219	22.8201	22.2918	24.7345	23.0017	23.9602	22.9566	23.3676	24.3408	23.1589	24.0046	23.5326	26.3384	26.7436	23.9896	26.9588	26.2906	25.989	27.1829	23.2894	24.0252	27.7725	22.3425	23.7235	23.4705	24.9586	23.0724	23.809	23.4589	23.0594	23.6036	24.5575	24.6889	24.1445	24.9531	24.8333	24.2952	25.6524	23.8922	23.2677	24.1008	23.9753	23.401	24.5564	25.1578
E9PCR7;E9PDF2;Q02218-2;E9PFG7	E9PCR7;E9PDF2;Q02218-2;E9PFG7	2-oxoglutarate dehydrogenase, mitochondrial	OGDH	OGDH	35.7733	35.882	35.8061	35.6387	35.7727	35.9392	35.89	36.0696	36.0971	36.27	36.0165	36.1373	36.2634	35.5223	36.0154	35.9175	36.1084	36.1216	36.0775	35.9874	36.6932	36.3343	35.8571	35.9896	36.0494	35.8917	36.1013	35.9662	35.8307	36.0166	36.206	36.08	35.0442	35.8116	35.7374	35.966	35.507	36.281	35.2863	35.9072	36.3654	35.6294	35.75	35.476	35.6245
E9PCW1;O95249;K7EJC8;G5E9T8;B4DQA8;O95249-2;F6RU00	E9PCW1;O95249;K7EJC8;G5E9T8;B4DQA8;O95249-2	Golgi SNAP receptor complex member 1	GOSR1	GOSR1	23.6043	22.3647	24.0668	27.4959	23.2536	26.6316	26.6022	23.4196	26.9621	21.4178	26.6611	26.3987	26.8796	26.5719	27.1744	27.0073	22.3397	26.2708	26.8271	27.0343	26.6319	26.1396	27.3011	23.9145	26.8483	24.7771	24.3328	22.0812	29.6978	25.4038	26.5034	26.5949	27.1454	24.8525	27.1936	27.3449	24.263	26.9079	26.6972	24.8262	29.3165	24.0691	25.3543	24.5942	24.0566
E9PCX7;H0Y8P5;D6RCR6	E9PCX7	#N/A	NNT	NNT	28.3709	28.152	29.2321	28.5097	29.7357	29.1581	29.6285	29.173	28.6082	29.2853	29.1708	28.7486	28.2703	28.6319	28.4857	27.1549	27.9606	28.0058	28.329	28.1627	28.4512	27.4637	28.4353	28.6014	29.0537	28.4987	28.2451	28.7548	29.4642	30.0935	29.1842	30.548	29.1322	28.4008	30.6275	28.8849	27.2807	28.6255	28.8012	29.1487	28.184	28.5492	29.0882	29.3015	28.4802
E9PDC3;O00192;C9JJX6;O00192-2	E9PDC3;O00192;C9JJX6;O00192-2	Armadillo repeat protein deleted in velo-cardio-facial syndrome	ARVCF	ARVCF	28.1711	28.9308	27.659	28.3938	28.6096	28.3099	28.6251	28.3652	28.3416	27.9763	27.1129	27.7527	27.2805	27.8791	28.6444	27.9015	28.5467	28.6801	28.3033	28.2129	27.0843	28.4903	29.0936	27.7638	28.4891	28.3669	27.5057	27.6625	27.0946	28.0576	28.1943	27.2543	26.5975	27.483	27.4113	27.7573	27.0311	28.1061	27.3133	29.168	29.1129	27.9432	27.8333	27.2299	27.8545
E9PDR0;P05166;C9JQS9;E7EX59;P05166-2;E7ETT1;E7ETT4;E7EUY3;E9PEC3;F8WBI9;E7ENC1;H7C5C9;C9JVW9;C9JVY9;C9JAW3	E9PDR0;P05166;C9JQS9;E7EX59;P05166-2;E7ETT1;E7ETT4;E7EUY3;E9PEC3;F8WBI9	Propionyl-CoA carboxylase beta chain, mitochondrial	PCCB	PCCB	32.2996	31.8943	32.3877	31.5798	31.8642	32.1958	31.6755	32.5912	32.3907	32.8154	32.5523	32.3694	32.8857	32.0259	32.7766	32.3953	32.6863	32.4313	32.6832	32.2296	33.1135	32.6456	32.3626	32.4523	32.4506	32.4438	32.3042	32.2327	32.7095	32.7164	32.7764	32.7851	32.3947	32.505	32.3073	32.6405	32.2291	32.6346	31.3526	32.4599	32.2756	32.2727	32.2765	31.9718	31.874
E9PEJ6;P98196;H0Y547;H0Y624;A2A3G9	E9PEJ6;P98196;H0Y547	Phospholipid-transporting ATPase;Probable phospholipid-transporting ATPase IH	ATP11A	ATP11A	26.0227	24.3843	25.4291	24.4597	25.5049	24.2255	26.6733	26.1897	25.1484	23.736	25.5504	25.3062	23.5739	23.9627	25.4059	25.7033	24.7371	25.9055	26.9151	27.0486	25.4141	23.2495	24.3617	25.8549	22.7441	23.7843	25.3495	25.4193	24.1094	27.2548	25.5533	25.7214	28.1845	25.0266	27.8757	24.2828	24.095	25.4085	24.8705	25.342	23.8348	25.3895	23.1931	23.6186	25.2401
E9PER6;O15530;O15530-3;O15530-4;O15530-2;Q6A1A2;O15530-5;H3BQ10	E9PER6;O15530;O15530-3;O15530-4;O15530-2;Q6A1A2;O15530-5	3-phosphoinositide-dependent protein kinase 1;Putative 3-phosphoinositide-dependent protein kinase 2	PDPK1	PDPK1	25.6827	25.6313	24.2917	23.054	26.4021	24.4845	24.9994	23.2166	25.497	23.4531	23.6512	24.541	24.7746	25.546	28.0938	24.2448	26.211	25.0733	25.4823	23.215	24.5339	25.1401	25.1317	24.8893	24.2761	25.3451	24.5809	25.4395	24.1017	24.955	25.5357	22.9921	24.1567	23.1843	22.6199	25.5537	25.2114	24.6586	23.5243	26.3952	24.4228	23.9247	25.4142	23.1639	23.5189
E9PF18;Q16836;Q16836-3;Q16836-2;A0A0A0MSE2;A0A0D9SFP2;A0A1W2PQV5;A0A1W2PNM1;A0A1W2PQ78;A0A1W2PP40;J3KR89	E9PF18;Q16836;Q16836-3;Q16836-2;A0A0A0MSE2;A0A0D9SFP2;A0A1W2PQV5;A0A1W2PNM1;A0A1W2PQ78	Hydroxyacyl-coenzyme A dehydrogenase, mitochondrial	HADH	HADH	36.0998	35.6955	35.9275	35.8513	35.9029	35.7855	35.9942	36.3701	36.4018	36.5577	36.5003	36.7068	36.5682	35.955	36.4065	36.1824	35.9955	36.3421	36.4901	36.2462	36.9901	36.1903	36.6496	36.5614	36.5019	36.454	36.0896	36.226	36.0179	36.5327	36.6501	36.5248	34.2809	36.3834	35.3233	36.2463	36.7728	36.1322	35.5013	36.1517	36.0692	35.4502	35.5878	34.9932	35.4651
E9PG18;H9KVD2;Q14524-6;Q14524-4;Q14524;K4DIA1;A0A0A0MT39;Q14524-5;Q86V90;Q9UI33-2;Q9UI33-3;Q9UI33;A3EY21;A0A0D9SGG2;A0A1W2PQ58;A0A1W2PQI5;A0A1W2PSB2;Q9UQD0-4;Q9UQD0-5;Q9UQD0-2;Q9UQD0	E9PG18;H9KVD2;Q14524-6;Q14524-4;Q14524;K4DIA1;A0A0A0MT39;Q14524-5	Sodium channel protein;Sodium channel protein type 5 subunit alpha	SCN5A	SCN5A	26.5865	24.8116	26.2231	25.6638	26.4667	27.1373	26.4203	25.6595	23.5022	25.566	27.2612	25.0984	25.3368	27.1622	26.5397	26.2579	26.435	27.096	25.8466	26.7093	26.8098	25.3583	26.2944	25.9607	26.6422	27.2323	27.8966	27.2635	26.2163	26.8053	26.4169	26.2929	26.9555	26.8897	25.4316	27.2355	28.1785	26.851	26.8257	26.1828	27.0343	27.7712	23.9845	24.7558	25.9868
E9PG22;Q8IW35;Q8IW35-2;H7C4Y5	E9PG22;Q8IW35;Q8IW35-2	Centrosomal protein of 97 kDa	CEP97	CEP97	23.5875	22.9454	23.2923	23.6263	22.9359	24.1206	23.5397	23.6384	24.0968	23.7227	23.8587	24.7834	23.9543	23.8796	23.8572	23.9088	22.4848	24.6187	24.8193	20.9624	24.5331	23.7857	21.885	22.6539	24.815	25.156	25.0449	23.5447	23.5351	24.0429	23.2306	23.0883	23.716	23.0217	24.816	23.7405	24.909	24.0189	23.6417	22.725	23.1597	22.7401	23.9456	24.1279	24.6172
E9PGC8;P78559;P78559-2	E9PGC8;P78559;P78559-2	Microtubule-associated protein 1A;MAP1A heavy chain;MAP1 light chain LC2	MAP1A	MAP1A	29.3602	29.6418	28.3232	30.3678	30.4174	31.359	26.9916	25.5409	26.3018	28.1892	28.4166	26.8643	27.1125	28.6593	25.3451	26.5164	22.4669	27.5356	26.5454	28.7856	29.1373	24.6471	25.87	27.7031	29.7673	30.2302	29.1357	28.0896	30.3431	26.5276	27.0084	28.0754	30.4893	28.4206	30.0301	28.5236	28.3791	26.4055	29.5334	28.9103	29.6291	25.5873	25.9938	26.5589	30.0292
E9PGT1;Q15631;Q15631-2;A0A0J9YVW2	E9PGT1;Q15631	Translin	TSN	TSN	30.0212	30.15	29.4963	30.149	29.7814	29.3879	29.368	29.1241	29.3291	28.5504	29.3264	28.8145	29.0506	28.7781	29.1589	28.7561	28.8713	28.8485	28.694	28.8974	28.8391	28.5174	29.3419	29.119	29.6716	29.1091	27.7139	29.004	28.9922	29.2195	29.2348	29.2911	29.5873	29.3606	29.6978	29.5135	28.9159	28.8434	29.3596	29.3433	28.7687	29.7406	29.858	29.2257	29.5608
E9PHK0;P05452;CON__Q2KIS7	E9PHK0;P05452	Tetranectin	CLEC3B	CLEC3B	28.7302	29.2793	28.465	29.3421	29.0378	28.1987	27.9154	27.608	27.2755	25.2456	25.6961	26.3142	27.2275	26.1913	26.1661	26.1085	27.685	25.9568	27.0441	26.7717	23.0749	27.6053	27.9946	25.2129	29.0744	28.6816	28.9967	29.006	28.7471	28.0169	28.5057	28.3163	31.3383	28.6175	29.4901	29.5181	28.2968	27.3944	30.1337	29.0013	28.4565	29.2078	28.7978	29.4961	28.3398
E9PJM3;Q9UK99-2;Q9UK99;Q9UK99-3;G3V1E0;E9PL46;Q49AF1	E9PJM3;Q9UK99-2;Q9UK99;Q9UK99-3;G3V1E0	F-box only protein 3	FBXO3	FBXO3	24.2664	24.5998	23.4054	24.6778	23.876	23.2756	24.0811	24.0132	25.0199	25.2322	25.5844	23.3502	22.8496	25.617	23.6954	24.349	24.1991	25.3587	23.9618	25.2468	25.2965	23.3553	25.7131	23.9912	25.4712	26.025	24.6444	23.2038	24.3505	23.5452	24.4598	24.9476	25.2189	24.8257	24.7756	25.4527	23.2835	26.4104	23.7767	24.1536	24.8083	24.1067	24.4843	23.5779	24.0086
E9PKC0;Q6IQ23;Q6IQ23-2;H0YDE2;Q6IQ23-3;A0A1B0GUN0;E9PL74;A0A1B0GUM1	E9PKC0;Q6IQ23;Q6IQ23-2;H0YDE2;Q6IQ23-3;A0A1B0GUN0	Pleckstrin homology domain-containing family A member 7	PLEKHA7	PLEKHA7	27.1228	24.1861	26.7124	26.7127	24.4984	26.1672	27.0273	27.1144	24.9709	24.4405	25.6795	26.7189	24.3248	23.7693	26.6144	23.7218	28.0261	23.7746	23.2226	26.8516	26.0321	27.8523	23.2489	21.9228	26.7184	26.4775	26.2066	26.8889	26.5866	26.4722	23.9123	27.5291	26.724	26.8306	26.6849	24.7186	26.0687	24.7328	23.4245	27.3541	25.6646	25.962	27.1611	27.0117	26.9198
H7BXH2;E9PKF6;Q5H9R7-6;Q5H9R7-2;Q5H9R7;Q5H9R7-5;Q5H9R7-4;Q5H9R7-3;H0YEN2;E9PNN8;H0YDW1;E9PJD8;E9PKG4;H0YEV0	H7BXH2;E9PKF6;Q5H9R7-6;Q5H9R7-2;Q5H9R7;Q5H9R7-5;Q5H9R7-4;Q5H9R7-3;H0YEN2	Serine/threonine-protein phosphatase 6 regulatory subunit 3	PPP6R3	PPP6R3	26.581	28.1347	26.5374	27.8802	27.0214	27.4223	28.1396	27.4343	27.217	27.6257	27.3295	27.0557	26.9648	27.9355	26.7262	27.813	27.743	26.4381	26.4288	27.623	26.6161	27.7652	27.3954	27.3372	28.1424	27.1464	28.5926	27.757	27.0394	27.601	27.7375	27.0845	27.6209	27.441	27.271	27.55	23.3629	29.0779	27.2473	27.6861	27.3487	27.6342	27.8093	23.7539	26.6074
E9PLK3;P55786;P55786-2;A6NEC2;A6NEC2-2;E9PJY4;E9PPD4;H0YDG0;E9PJF9;E9PPZ2;A6NEC2-3;H0YCQ5;E9PJ74;E9PRQ5;E9PI82	E9PLK3;P55786;P55786-2	Puromycin-sensitive aminopeptidase	NPEPPS	NPEPPS	33.0037	32.9385	33.2882	33.0401	33.2971	33.1588	33.2493	33.3681	33.1864	33.0662	33.1306	32.8594	32.8874	33.3733	33.128	32.749	33.258	33.061	33.3854	33.0429	33.2837	33.2899	33.3331	32.8658	33.2042	33.1288	33.3872	33.2359	32.9916	33.3382	33.4082	33.1989	33.1615	33.1027	33.3689	33.3588	33.0011	33.2433	32.8745	33.0176	33.2935	33.1776	33.1122	33.0483	32.9432
E9PLL6;P46776;E9PJD9;E9PLX7	E9PLL6;P46776;E9PJD9	60S ribosomal protein L27a	RPL27A	RPL27A	28.4773	29.3354	29.6032	29.0341	28.8799	29.7187	29.3759	29.7612	29.2688	30.0352	30.2708	29.2622	29.4315	30.8602	30.1948	30.4391	29.6234	29.7903	29.3473	30.2325	29.9156	29.4055	29.4114	30.369	29.9326	29.9734	30.0303	29.726	29.9077	29.521	30.3857	29.7432	30.0054	29.767	29.9094	30.4037	29.8634	29.3626	30.4044	30.005	29.6822	29.7498	29.4847	29.4444	29.0313
E9PM92;O00193;E9PRZ9;E9PQA1	E9PM92;O00193;E9PRZ9	Small acidic protein	C11orf58	C11orf58	26.1986	26.5129	26.6915	26.4695	26.5152	25.8524	25.0525	25.8776	23.95	24.2478	25.0693	23.8733	24.8882	26.3281	26.4128	23.8545	25.6055	22.4827	24.1921	25.3904	26.1536	26.2493	26.0974	25.7039	26.0495	25.1797	25.9591	25.9318	26.0309	25.6376	23.8015	27.0822	26.0747	27.2623	27.1863	23.8613	24.0592	25.702	23.7264	25.6422	25.9027	25.6547	26.1984	25.1648	23.7515
E9PMC9;Q7Z589;Q7Z589-5;Q7Z589-2;Q7Z589-4;Q7Z589-7;Q7Z589-6;H0YDI4;E9PPE6;H0YCS3;H0YET8	E9PMC9;Q7Z589;Q7Z589-5;Q7Z589-2;Q7Z589-4;Q7Z589-7;Q7Z589-6	Protein EMSY	EMSY	EMSY	24.7624	23.6702	24.1665	23.4632	23.2751	23.37	24.5612	22.9245	24.743	24.3699	24.818	26.4898	24.3117	26.2878	24.4462	24.4201	23.8342	26.7892	25.9604	24.8967	24.548	24.5958	25.0306	25.4918	22.7339	23.7203	25.7005	25.4905	24.0415	25.4576	24.338	24.4538	23.6931	27.2334	23.4529	23.7078	24.6193	21.4528	24.5765	25.3139	22.0319	23.9463	25.4106	27.2262	26.4489
E9PMS6;Q8WWI1-3;E9PMP7;E9PJ10;E9PK58;H0YE95;E9PLU6	E9PMS6;Q8WWI1-3;E9PMP7	LIM domain only protein 7	LMO7	LMO7	27.0715	27.6978	27.0095	27.4308	27.2609	27.6769	27.7022	27.0996	26.7353	26.7684	26.9212	27.0357	22.411	28.2107	28.5927	27.7867	23.7292	27.4512	26.7514	27.4232	26.4052	26.5278	27.5924	27.1516	27.5654	23.0539	28.0566	25.5906	23.6295	27.0129	27.6284	27.7688	27.2093	26.9067	27.8186	24.7377	27.8654	27.7122	26.3118	27.8995	27.4703	27.5259	27.891	27.0086	27.445
E9PP49;P25067	E9PP49;P25067	Collagen alpha-2(VIII) chain	COL8A2	COL8A2	23.4211	24.9709	24.8556	26.1152	25.4687	23.6735	23.5602	22.365	22.3803	22.5805	24.8721	24.2701	24.347	24.1219	23.6235	22.6836	25.8096	24.7299	23.6914	23.9308	24.3957	24.1415	23.5876	22.6793	23.5814	24.021	23.7145	21.3645	23.253	24.6482	23.6808	24.739	26.4168	23.8926	25.9586	24.9745	23.357	23.5873	22.424	24.6246	23.5272	23.6475	23.5014	27.521	24.0283
E9PR30;P62861;E9PM49	E9PR30;P62861;E9PM49	40S ribosomal protein S30	FAU	FAU	28.2252	28.1816	28.2623	28.1738	28.4316	28.2456	28.5137	28.3224	27.9045	28.5048	24.6928	27.8377	28.8844	29.0204	29.1576	28.8612	27.4953	27.9273	27.4819	29.0747	29.476	27.8716	28.6385	30.0036	28.8368	27.9851	28.0014	28.3842	23.7379	28.5608	29.1218	28.4884	29.2818	28.6941	29.0052	28.4722	28.7963	27.9455	28.133	28.1299	29.0928	28.5909	28.4329	24.6925	28.1876
E9PSI1;E9PQ80;E9PQI5;E9PMQ9;O15321-2;O15321;E9PL78;E9PJM1;E9PJC4;E9PQY7;E9PS99;H0YI89;G3V1B9;E9PNW2	E9PSI1;E9PQ80;E9PQI5	#N/A	CHMP4A	CHMP4A	26.2951	27.13	25.4799	27.6294	27.2189	22.6781	27.2827	23.0212	26.6866	26.501	23.1447	27.8748	23.2557	26.7425	27.5556	27.1401	28.8031	27.48	26.6729	27.3459	27.0797	26.3476	25.0908	23.9266	27.0657	24.4411	27.0779	26.984	23.4827	23.374	27.8085	24.6675	25.8175	23.7109	23.1945	28.5931	25.8902	27.0511	23.6275	27.6828	23.6335	24.2356	23.7682	21.9634	26.6767
F1T0E5;Q9ULU8-3;Q9ULU8-2;Q9ULU8-5;H7C538;H7C4K9;A0A0C4DGY2;H0YFP0;H7C4P2	F1T0E5;Q9ULU8-3;Q9ULU8-2	Calcium-dependent secretion activator 1	CADPS	CADPS	28.8407	27.0619	28.1656	26.6747	26.0552	25.512	25.3303	23.8596	28.0107	25.6964	24.853	23.5969	26.794	23.306	26.8656	25.4897	27.926	22.6132	22.0982	25.2887	28.3667	24.4659	25.0031	25.5691	27.7138	30.6289	26.5831	26.2682	27.7857	27.4761	25.796	27.1821	28.7902	25.691	27.0483	27.123	24.8569	25.2503	27.1793	27.7168	26.3943	24.2949	28.5111	25.5707	24.8384
F2Z2X4;Q9C0E2	F2Z2X4;Q9C0E2	Exportin-4	XPO4	XPO4	23.1522	23.9768	27.2815	25.2216	25.6437	26.0477	26.3112	23.5896	25.9937	26.9598	24.4016	24.4579	23.0571	25.3105	24.6598	24.3462	24.2951	25.7941	23.6431	24.1286	23.1813	24.3281	24.7301	26.6734	27.9246	25.2044	26.266	24.6441	26.0776	24.6416	25.0763	26.1679	23.7401	24.8462	25.2255	24.9099	27.7425	26.3596	23.9669	26.0306	25.3075	23.9751	23.7352	24.2127	23.757
F5GWH5;P61165	F5GWH5;P61165	Transmembrane protein 258	TMEM258	TMEM258	23.4922	23.7323	25.2912	25.1899	24.1063	25.8396	23.386	25.2127	23.0603	23.5266	27.1414	24.0902	24.5694	26.8517	25.1054	25.8437	25.9114	25.9631	25.5268	26.0871	26.7879	25.7843	25.9612	26.5849	25.412	24.8001	24.9525	26.4479	19.0039	26.7345	25.5498	26.2309	24.1699	25.2497	24.2618	26.0303	26.5154	25.6048	23.3306	25.5214	23.1074	23.1123	24.3641	23.761	23.8834
F5GWT4;Q9H4A3-2;Q9H4A3;Q9H4A3-5;Q9H4A3-6;Q9H4A3-7;Q9H4A3-4;F6UYG0;H0YH68;K7ENT7;Q96J92-2;Q96J92-3;Q96J92	F5GWT4;Q9H4A3-2;Q9H4A3;Q9H4A3-5;Q9H4A3-6;Q9H4A3-7;Q9H4A3-4	Serine/threonine-protein kinase WNK1	WNK1	WNK1	23.9021	25.6098	25.3447	26.6002	25.9772	25.5273	26.2788	26.93	22.577	23.9066	25.9895	26.4847	24.9807	25.4766	25.9414	26.1989	26.3385	25.875	26.4441	26.5872	26.0816	26.1906	26.9301	26.4879	26.389	25.3638	26.2056	26.2384	26.1805	26.5805	27.0303	25.8743	26.417	26.7754	26.6649	26.4738	26.4259	25.6293	26.3628	25.3922	28.3498	25.3228	25.8779	23.8211	23.8107
F5GXE4;O95260-2;B4E107;Q5SQQ1	F5GXE4;O95260-2;B4E107	Arginyl-tRNA--protein transferase 1	ATE1	ATE1	27.1601	28.0267	27.2079	27.5847	27.281	26.8955	27.159	27.4834	26.2776	27.1895	26.691	27.1702	27.3697	27.1193	26.9447	27.1529	26.9546	27.3498	25.5517	26.8399	26.6724	27.4547	27.5147	25.798	27.364	27.4561	26.3488	27.0645	27.2533	27.2755	27.3001	27.5784	27.6037	27.2908	27.7678	26.9838	27.5403	26.7372	26.4774	26.7068	26.6963	27.7698	27.906	26.8805	27.1457
F5GXX5;P61803;F5H895;A0A0B4J239	F5GXX5;P61803;F5H895;A0A0B4J239	Dolichyl-diphosphooligosaccharide--protein glycosyltransferase subunit DAD1	DAD1	DAD1	28.9273	28.1716	28.6452	28.4676	28.9691	29.1306	28.3221	28.1551	28.4959	28.4602	28.2888	28.1785	28.4002	29.1772	27.4335	29.2246	27.3724	28.2562	27.912	28.2564	28.1665	28.2161	27.5841	27.5198	27.2858	29.0612	28.0671	27.8767	27.5373	28.4717	28.2301	28.8382	29.3848	27.8673	29.2628	28.3413	27.7154	27.5856	28.246	28.5731	29.0344	29.2882	29.1374	29.4484	27.8385
F5GYJ5;Q9NX18;F8W679;M0QYN2;F5GXW4;M0R060;F5H5T6;F5H8E2	F5GYJ5;Q9NX18;F8W679;M0QYN2;F5GXW4;M0R060;F5H5T6	Succinate dehydrogenase assembly factor 2, mitochondrial	SDHAF2	SDHAF2	28.7452	29.662	29.1386	29.4325	29.3627	29.3593	30.2913	29.0041	29.0554	30.1819	29.3592	29.3449	29.6177	29.2821	29.2436	29.216	29.7022	30.3599	29.4346	28.6934	30.7167	29.9464	29.9314	29.143	29.6568	29.8376	30.0394	29.2933	29.4147	29.8146	29.7571	29.365	28.6031	29.1162	27.9399	30.0058	29.8791	29.4921	28.9716	27.8689	29.3716	28.3686	28.1517	27.6716	28.3566
F5GZ97;Q9Y3C0;F5GWI9;F5GXZ7;H0YGN0;F5H0A7;F5GXZ4;F5H2P1	F5GZ97;Q9Y3C0;F5GWI9;F5GXZ7;H0YGN0	WASH complex subunit CCDC53	WASHC3	WASHC3	22.0985	23.2674	25.2085	23.9355	24.6851	25.131	23.8214	24.3318	23.9235	25.0347	23.2789	25.8455	24.6839	26.791	24.744	24.5291	25.127	24.5077	22.4745	24.832	25.63	24.1221	25.2522	24.5873	22.6584	25.7813	25.3501	24.5385	23.6265	24.7161	24.4414	23.7453	23.6632	22.9242	23.9719	25.3234	23.7924	24.2948	23.4926	23.5778	22.5028	24.1713	21.975	23.74	25.7316
F5GZK2;Q96P44-3;Q96P44;Q96P44-2	F5GZK2;Q96P44-3;Q96P44;Q96P44-2	Collagen alpha-1(XXI) chain	COL21A1	COL21A1	23.6741	25.4299	24.6169	24.1851	24.0371	26.5427	24.7684	22.5544	23.2309	22.7305	24.2659	24.2018	22.0565	24.619	24.7577	23.2717	23.94	24.1172	25.0021	25.7596	24.5838	23.6069	22.1781	23.6254	22.836	24.6333	25.9082	22.7419	24.7001	26.0955	23.0832	23.3566	29.1988	24.4596	27.0763	24.8178	25.3993	23.9281	23.8658	24.9537	24.0834	23.8026	24.0418	28.4718	24.2776
F5GZS6;J3KPF3;P08195-2;P08195-3;P08195;P08195-4;H0YFS2;F5H0E2;F5GZI0;F5H867;H0YFX4;F5GZR9	F5GZS6;J3KPF3;P08195-2;P08195-3;P08195;P08195-4	4F2 cell-surface antigen heavy chain	SLC3A2	SLC3A2	25.9247	25.8788	24.9464	25.209	23.2142	25.512	22.7969	26.9015	24.2373	24.6738	24.0068	26.0908	25.321	25.7353	25.9529	28.482	24.0535	26.0891	22.3844	26.2019	25.3418	23.9594	24.2217	25.5117	25.2725	24.2084	26.5838	23.9843	24.3888	23.2293	25.496	24.2469	24.7976	24.1369	23.8313	24.4785	23.9877	23.6899	25.9769	25.6966	26.1234	22.7164	23.9208	26.4341	25.427
F5H0F9;Q9UJX4;Q9UJX4-3;H0YFB5;F5GY68;Q9UJX4-2;F5H0N1;F5H3S5	F5H0F9;Q9UJX4;Q9UJX4-3;H0YFB5	Anaphase-promoting complex subunit 5	ANAPC5	ANAPC5	26.6959	27.3002	27.2625	27.1138	31.212	29.1082	26.7268	25.1872	24.6669	28.3501	26.7409	30.3724	24.6786	22.208	21.0098	29.01	30.0426	23.4374	25.327	30.0287	23.0322	29.2396	25.894	23.0959	30.6179	30.4354	30.3867	31.0181	23.2886	30.6207	24.0013	31.6686	24.7318	30.5647	27.8939	31.0466	24.5237	25.7214	23.9371	24.4986	21.9823	27.037	22.3607	32.1117	22.5979
F5H0U5;Q9NZD2;H0YFS9;F5GZ49	F5H0U5;Q9NZD2	Glycolipid transfer protein	GLTP	GLTP	25.6301	25.3364	26.7137	27.0806	25.1365	26.2036	26.4251	25.9141	26.8473	26.7836	23.3807	25.2095	26.5985	26.7661	27.1992	23.324	26.9985	26.1492	25.9634	26.253	28.3217	26.203	26.4818	27.6678	27.9095	26.8344	27.5921	23.1983	27.4417	25.7061	26.7491	23.5241	26.1596	26.6671	25.4866	26.8102	24.9777	26.7269	26.8175	27.2628	27.2641	25.1482	24.8086	25.4212	24.9475
F5H365;Q15436;Q15436-2;G3V4V1;G3V1W4;G3V3G5;G3V2R6;G3V5X8;G3V4Q2;G3V5K1	F5H365;Q15436;Q15436-2	Protein transport protein Sec23A	SEC23A	SEC23A	29.8399	30.3704	29.188	29.2272	29.3167	29.8213	29.8861	28.9879	29.3844	29.7327	29.8007	29.3263	29.3394	29.7977	29.9028	30.1213	29.7305	29.1303	29.0204	29.7799	29.8336	29.9261	29.4143	29.7294	29.6099	29.8159	29.7379	29.5793	29.7904	29.7944	29.8218	30.0351	29.7433	29.7723	29.4907	29.9292	29.5764	29.3582	29.5802	29.354	29.7161	29.6848	30.0439	28.6694	29.4595
F5H442;Q99816;Q99816-2;J3QKS4;J3QRU6	F5H442;Q99816;Q99816-2	Tumor susceptibility gene 101 protein	TSG101	TSG101	28.2415	28.4158	27.7895	28.7031	28.8687	28.5005	28.7842	28.0402	28.3928	28.1922	28.3173	28.443	28.1439	28.9201	27.4758	27.8744	29.0159	27.6484	27.7705	28.7046	28.2905	28.2823	28.8324	28.0851	27.8045	28.3637	28.0314	28.3697	27.8345	28.358	28.7671	27.9974	28.7341	27.8482	27.9627	28.5191	28.1666	27.6976	27.6207	27.3232	28.2097	27.5457	28.209	26.6926	28.4028
F8W0J6;F5H4R6;H0YIV4;P55209-2;P55209;F8VUX1;F8VY35;F8W020;F8VXI6;F8VVB5	F8W0J6;F5H4R6;H0YIV4;P55209-2;P55209;F8VUX1;F8VY35;F8W020;F8VXI6	Nucleosome assembly protein 1-like 1	NAP1L1	NAP1L1	29.7286	30.5368	30.481	30.7007	30.8115	31.1252	30.4514	30.065	30.1915	30.4029	30.1526	29.8616	29.5114	31.2663	31.0899	30.7118	30.4919	29.6139	30.2044	30.8908	30.4934	30.3063	30.5821	30.9992	29.8958	30.8694	30.3798	30.6872	30.6636	30.4484	30.1251	30.1724	30.9453	30.5818	30.449	31.2391	30.4283	30.3271	30.8827	30.3857	30.0594	29.8031	30.1738	29.7421	29.8637
F5H5D3;Q9BQE3;A0A1W2PQM2;F8VVB9;F8VRZ4;F8VS66;F8VWV9;F8VX09;F8VRK0;F8VXZ7;F8VRK1;F8W0F6	F5H5D3;Q9BQE3;A0A1W2PQM2	Tubulin alpha-1C chain	TUBA1C	TUBA1C	35.4378	35.7033	35.2943	35.9337	35.7577	36.0276	35.9777	35.2302	35.5231	35.2093	35.1562	35.5887	35.048	35.9891	35.0464	35.3219	35.4024	35.281	35.247	35.5184	34.9195	35.4513	35.6927	35.0555	35.466	35.4884	35.4558	35.5769	35.5098	35.3073	35.3824	35.5153	35.5105	35.4177	35.3216	35.7807	35.5233	34.9795	35.512	35.3185	35.7	35.3459	35.3397	35.0326	35.4469
F5H5I6;Q12849;H0Y8R1;H0YAK1;Q12849-5;H0YAM1	F5H5I6;Q12849;H0Y8R1;H0YAK1;Q12849-5	G-rich sequence factor 1	GRSF1	GRSF1	29.0967	28.549	28.6984	28.9895	29.1267	28.768	28.7154	28.6223	29.2779	29.2869	28.7786	29.0982	28.7381	29.1473	28.3398	29.2986	29.1529	28.9719	29.2832	28.8689	29.589	29.041	28.5874	28.2424	28.5587	29.5883	28.6749	28.4437	28.3601	29.463	29.0256	29.1376	29.5533	28.8413	28.9042	29.0596	27.4437	28.8038	28.3836	27.8753	28.481	29.3887	29.1631	28.3227	28.5128
F5H5P2;P12694;P12694-2;F5GXU9;H0YH31	F5H5P2;P12694;P12694-2;F5GXU9	2-oxoisovalerate dehydrogenase subunit alpha, mitochondrial	BCKDHA	BCKDHA	32.1061	32.3362	32.4612	31.6573	31.8708	31.8947	31.9962	32.5649	32.5083	32.7129	32.6464	32.4126	32.603	32.1796	32.7781	32.5342	32.8653	32.7572	32.4068	32.6646	33.4929	33.0465	32.4472	32.688	32.1679	32.6202	32.6461	32.3046	32.7187	32.9796	33.1543	32.8696	32.2662	32.558	32.2313	32.397	31.9611	32.919	31.7722	32.0527	32.352	32.0898	31.4483	32.1948	31.3532
F5H619;Q86XA9;Q86XA9-2;H7C5W6;H0YIW3;F8VQQ6;H0YHE0;H0YHS5;Q86XA9-3	F5H619;Q86XA9;Q86XA9-2;H7C5W6	HEAT repeat-containing protein 5A	HEATR5A	HEATR5A	27.6676	27.5424	27.9918	28.0308	27.7486	23.7966	27.4367	22.1974	24.008	23.0135	23.1448	27.2814	23.664	23.1305	24.1685	23.3898	23.212	23.7259	23.031	26.7816	24.7869	23.1844	23.5151	23.7094	26.8261	28.3445	24.4885	22.4888	23.4501	27.4369	24.4956	27.4315	23.2316	23.8555	24.102	25.7995	24.0496	22.9383	24.8232	25.2374	26.5179	24.5868	28.0154	24.5715	28.2206
F5H6U7;Q9Y3E0;F5GWD8;F5GXH6;G3V1U5	F5H6U7;Q9Y3E0;F5GWD8;F5GXH6;G3V1U5	Vesicle transport protein GOT1B	GOLT1B	GOLT1B	26.4181	27.6167	25.8205	26.2998	24.5237	27.3526	27.1273	26.0539	27.2428	27.6033	26.8173	25.77	26.3103	27.1795	26.6768	27.2738	26.3895	26.7223	26.2169	26.6446	27.107	26.861	27.2888	27.7077	27.4448	27.3333	27.2409	27.9837	26.5266	27.4073	27.3001	27.354	26.1273	26.3219	26.0635	27.1884	27.204	27.4448	26.6407	26.6352	27.1977	26.6227	25.8096	25.9627	26.4337
F5H6Z0;Q00537-2;Q00537;F8VZY6;F8VQZ9;F8W1S5	F5H6Z0;Q00537-2;Q00537	Cyclin-dependent kinase 17	CDK17	CDK17	27.224	26.8051	23.9519	23.5629	24.7748	29.7556	22.5671	27.1275	24.897	25.8435	22.7279	24.2518	27.1761	24.1467	26.3101	23.3675	24.2425	23.7884	25.5637	24.2084	23.8371	28.9286	25.1027	27.4387	24.1886	25.3651	23.5861	24.3441	24.1228	27.201	26.9981	27.0388	29.0758	24.0465	24.5286	27.941	26.7627	25.0847	27.3128	26.8498	23.2308	26.6667	27.6115	23.0611	26.8198
F5H702;Q96GC5-3;Q96GC5;F5H8D0	F5H702;Q96GC5-3;Q96GC5	39S ribosomal protein L48, mitochondrial	MRPL48	MRPL48	23.2339	26.2281	27.5841	25.971	26.5084	25.7873	25.157	25.7642	26.2143	26.2733	25.4109	25.775	25.8978	25.7199	27.9507	25.9132	26.1942	24.9062	26.2957	24.6604	27.225	24.0395	25.6449	25.8584	26.1573	25.371	26.7019	27.4217	26.3435	27.391	26.6657	26.4237	24.9717	26.1827	25.5738	26.006	24.8345	26.8342	26.0098	26.3594	25.6261	26.1632	26.0711	23.3359	24.7594
F5H8B0;P08709-2;P08709	F5H8B0;P08709-2;P08709	Coagulation factor VII;Factor VII light chain;Factor VII heavy chain	F7	F7	22.3577	25.3841	24.8528	26.5259	22.7424	23.3357	24.9679	24.0508	23.2247	23.6448	23.2884	23.6358	23.7052	24.9479	23.9905	24.6078	21.5545	22.9012	23.4812	24.4598	23.8617	23.4767	21.7909	24.1924	24.0079	25.2264	23.4446	23.3888	24.6453	23.2591	25.743	25.5943	25.0696	24.1936	25.7882	25.0995	23.1351	25.5874	25.4473	23.8229	23.0133	24.9942	25.2275	23.1588	25.1717
F5H8H2;Q03426;F5H092;F5GXC0;A0A1B0GWC2;F5H163;F5H368;A0A1W2PS16;A0A0B4J236;A0A1B0GWF3	F5H8H2;Q03426;F5H092;F5GXC0	Mevalonate kinase	MVK	MVK	26.91	26.8703	25.0155	23.3012	27.5092	26.94	24.5918	26.7683	25.4242	25.5001	23.2299	25.8387	23.3698	24.7017	25.5617	23.4762	24.2917	23.0006	23.177	23.7684	25.4827	25.6155	26.3597	25.4888	24.8102	25.1709	24.2281	26.8141	25.7835	23.4696	27.2915	25.393	22.7465	25.0504	23.6433	24.3976	23.6781	23.9387	25.2117	25.4686	28.2033	25.1207	25.0059	24.6532	25.5925
F6U236;Q9BY11	F6U236;Q9BY11	Protein kinase C and casein kinase substrate in neurons protein 1	PACSIN1	PACSIN1	24.3086	25.5403	23.6112	22.3656	23.7182	25.3372	24.1312	24.7421	23.4647	22.3235	23.9227	21.5843	23.9148	23.5956	24.8667	25.148	23.4945	23.949	23.3624	25.4764	23.2213	22.9001	25.1671	24.2078	24.0044	26.9942	26.4519	23.7047	23.7292	23.7561	24.8669	23.5054	26.3446	24.2441	25.2141	23.7336	23.7301	23.7814	24.8047	25.5588	23.0441	24.3224	26.9797	24.5866	23.892
F6UJY1;Q5T013;J9JIE9;E7EWH8;A0A0A0MTR5;Q5T013-3;H0YB70;F6UJY9;Q5T013-4;H0YB18;Q5T013-2	F6UJY1;Q5T013;J9JIE9;E7EWH8;A0A0A0MTR5;Q5T013-3;H0YB70;F6UJY9;Q5T013-4;H0YB18;Q5T013-2	Putative hydroxypyruvate isomerase;Hydroxypyruvate isomerase	HYI	HYI	26.4542	23.9333	25.9776	26.9401	24.9077	26.6425	25.0191	24.4696	22.668	23.3002	22.331	24.9114	23.5781	24.3397	24.8757	24.0637	25.7609	25.3587	26.4516	23.9757	26.5636	24.0239	25.6575	26.2963	27.0751	27.0701	24.9055	27.073	25.5406	23.3328	24.2521	25.9284	23.6094	25.78	25.9524	26.198	23.8276	24.9142	25.9596	23.5775	26.2698	22.0574	24.1375	24.8521	27.3008
F6VCX5;Q16816;Q16816-2;C9J2Q6;C9JME8;F8WD25	F6VCX5;Q16816;Q16816-2;C9J2Q6	Phosphorylase b kinase gamma catalytic chain, skeletal muscle/heart isoform	PHKG1	PHKG1	26.4636	23.1148	27.3316	25.5237	26.4105	26.038	27.2897	27.3315	27.1877	28.1848	27.976	23.0982	27.8108	22.153	27.7392	26.5531	28.186	28.1645	28.0867	25.8162	27.9964	28.183	28.8803	26.8579	27.0633	28.419	28.4291	27.3205	27.7348	28.4627	27.7732	26.9366	27.4904	26.3806	27.8345	28.1552	27.5673	28.14	27.8856	27.3333	26.7286	27.7247	27.9768	26.9967	26.1221
F6WQW2;C9JXG8;C9JGV6;C9JDM3;C9JIC6;F8WCY3;Q5T0Z6;Q9C010;Q9C010-2	F6WQW2;C9JXG8;C9JGV6	#N/A	RANBP1	RANBP1	28.7091	27.8479	27.3044	27.0232	27.2818	28.2027	27.4185	28.6011	23.1719	27.8572	28.4739	27.6508	28.4901	29.0196	27.5205	26.8348	27.9761	27.4153	27.8315	28.1334	27.7106	27.6571	28.016	27.4685	27.9508	27.7044	27.982	28.7831	28.6694	26.5441	28.3495	27.0002	27.2805	27.6798	28.1231	27.3495	27.6098	28.0609	28.6993	26.9727	28.3085	27.9528	28.3063	27.9861	28.079
F8VVA7;P61923;F8W651;P61923-4;F8VYZ4;P61923-5;F8VYK5;F8VXB1;F8VUC5;F8W156;P61923-2;P61923-3;F8VXR1;F8VYE0	F8VVA7;P61923;F8W651;P61923-4;F8VYZ4;P61923-5;F8VYK5;F8VXB1;F8VUC5;F8W156;P61923-2;P61923-3	Coatomer subunit zeta-1	COPZ1	COPZ1	28.4211	28.0724	28.4834	28.1785	28.6742	28.4762	28.1133	28.1931	28.3086	28.0764	28.3325	28.0719	28.0687	28.9634	28.9139	28.7645	28.4847	28.1635	27.6821	28.5445	28.6551	28.2239	28.3699	28.6343	27.9987	28.6727	27.7363	28.4025	28.5759	28.1399	28.3757	28.6186	28.1147	28.2566	28.7756	28.2203	24.7011	27.5234	27.9453	25.6796	27.7823	27.9642	27.418	27.9563	27.8878
F8VXC8;Q8TAQ2-2;Q8TAQ2-3;F8VZW6	F8VXC8;Q8TAQ2-2;Q8TAQ2-3	SWI/SNF complex subunit SMARCC2	SMARCC2	SMARCC2	24.5972	24.6442	23.9721	25.1356	24.4318	24.0341	25.6892	24.7769	27.4022	24.9049	24.5112	24.6811	24.3917	23.128	25.913	25.6898	24.9253	24.6212	24.4387	25.4543	25.7734	25.4984	23.629	26.5101	25.4793	24.5	22.7427	24.5191	25.7206	25.4416	23.8452	24.9942	25.4051	23.1857	26.1362	23.926	27.5671	23.2577	23.9992	22.8211	24.0044	25.975	25.854	25.1917	25.702
F8VXY3;P00973-2;P00973-4;P00973;P00973-3;H0YI20;H0YIB8;F8VPW7;F8VUC8	F8VXY3;P00973-2;P00973-4;P00973;P00973-3;H0YI20	2-5-oligoadenylate synthase 1	OAS1	OAS1	25.0163	26.4901	26.865	27.8753	27.5707	27.8057	27.5475	26.4297	22.6869	25.602	24.3383	25.3756	22.6146	23.9858	27.0815	22.4892	24.3079	22.6704	23.5929	23.6302	26.9986	24.9387	26.4781	23.0918	24.1722	27.2072	25.8817	25.6336	24.4973	24.4896	21.7613	27.3302	28.1838	27.5667	24.6283	23.9145	26.9242	27.8633	23.0827	28.7671	23.8821	27.4415	23.1229	24.5452	26.2287
F8W1A4;P54819-2;P54819;P54819-3;P54819-5;P54819-6;F8VY04;P54819-4;F8VZG5;G3V213;F8VPP1	F8W1A4;P54819-2;P54819;P54819-3;P54819-5;P54819-6;F8VY04;P54819-4;F8VZG5;G3V213	Adenylate kinase 2, mitochondrial;Adenylate kinase 2, mitochondrial;Adenylate kinase 2, mitochondrial, N-terminally processed	AK2	AK2	32.9889	32.5416	32.6828	32.8197	32.4226	32.8423	32.747	33.3473	33.0296	33.4006	33.2296	33.1548	33.2334	32.9778	33.2661	33.2725	33.2393	32.4744	32.9748	33.2353	33.4111	33.16	32.7182	33.1828	32.884	32.8144	33.0686	32.5866	33.0303	33.2504	32.9624	33.1691	32.1055	33.04	32.5975	32.7501	32.8194	32.9303	32.3871	32.5568	32.1658	32.8712	32.214	32.5656	32.4509
F8W1B3;Q8WUD6-2;H0YI24	F8W1B3;Q8WUD6-2	Cholinephosphotransferase 1	CHPT1	CHPT1	25.8395	25.1004	25.6412	25.9903	26.3576	24.8591	25.3567	26.438	26.1235	25.8915	25.9291	25.5472	25.5664	25.6893	25.8877	25.8729	25.8077	26.5919	26.3222	25.424	27.0973	25.6695	26.8836	23.2317	26.1338	25.876	26.4173	24.0673	26.5742	26.7704	25.23	26.614	26.4922	23.8305	26.338	25.8838	25.3773	26.4381	24.0146	25.6738	25.456	26.0037	26.1066	25.6449	25.6775
F8W7C6	F8W7C6	#N/A	RPL10	RPL10	29.979	29.4623	29.5628	28.9507	28.7423	29.1001	29.0143	29.3595	29.0609	29.6666	29.9163	28.9946	29.1443	29.7627	30.184	30.1174	29.14	28.9168	29.0304	29.5021	29.5715	29.4312	29.1637	29.5858	28.522	29.0935	29.583	29.0941	28.9982	29.4734	29.2305	29.4755	30.1499	28.6928	30.1732	29.4677	29.0107	29.9747	28.2897	30.1054	29.0888	28.9822	29.4504	29.3717	28.4678
F8W7Q4;Q96A26;E9PH05	F8W7Q4;Q96A26;E9PH05	Protein FAM162A	FAM162A	FAM162A	32.0348	31.7908	31.9457	31.7395	31.7699	32.3304	32.222	32.1697	32.0444	32.4486	31.6308	31.9943	32.7128	31.595	31.5643	31.9257	31.8542	31.7674	32.2416	31.8536	32.361	32.0073	31.6396	31.2295	31.7296	32.0881	32.4368	32.192	32.0497	32.6024	32.2351	32.7741	32.7955	30.7203	31.9114	31.6923	31.538	31.6476	31.7071	32.0438	32.014	32.4641	31.9686	32.2723	31.9847
F8W876;P48740-3;C9JMA2	F8W876;P48740-3	Mannan-binding lectin serine protease 1;Mannan-binding lectin serine protease 1 heavy chain;Mannan-binding lectin serine protease 1 light chain	MASP1	MASP1	24.1746	24.4526	22.8061	26.167	24.8777	24.398	23.3863	25.422	23.2817	23.0326	25.8241	22.5769	23.8188	25.0179	22.5952	24.0324	24.4642	23.9319	23.8918	24.0888	23.754	23.3602	23.0135	24.6686	22.855	25.8017	25.6711	24.3922	24.9754	24.6485	24.0909	22.7546	26.4327	25.5649	23.2547	25.266	23.2368	23.2529	22.6983	23.4822	25.0368	25.4957	23.5599	23.3262	24.9137
F8W8Z9;Q8N4H5;Q8N4H5-3;Q8N4H5-2;H3BUX3;H0YFG9	F8W8Z9;Q8N4H5;Q8N4H5-3;Q8N4H5-2	Mitochondrial import receptor subunit TOM5 homolog	TOMM5	TOMM5	25.7982	26.2167	26.7803	25.6947	25.1171	23.9979	25.0162	25.4684	24.9826	25.1541	25.6747	23.2061	23.4595	24.6259	23.8374	23.1629	23.4186	24.5695	23.3398	25.04	25.2825	23.1504	25.4345	24.8075	25.3481	23.1647	25.3087	24.6515	24.0495	25.7492	24.5762	25.2131	23.4384	23.1925	24.0086	22.8586	26.0955	25.6744	25.8635	25.2994	24.5334	24.7022	24.0332	26.4821	26.0246
F8W930;Q9Y6M1-1;Q9Y6M1;Q9Y6M1-5;Q9Y6M1-6;Q9Y6M1-3;Q9Y6M1-4	F8W930;Q9Y6M1-1;Q9Y6M1;Q9Y6M1-5;Q9Y6M1-6;Q9Y6M1-3;Q9Y6M1-4	Insulin-like growth factor 2 mRNA-binding protein 2	IGF2BP2	IGF2BP2	23.3437	25.8323	25.4662	24.4874	24.4458	24.3313	23.8369	25.0207	22.7538	25.4137	24.8227	23.257	24.7665	23.0006	24.9836	25.4475	25.5941	25.1367	23.902	25.2328	24.6159	25.0772	25.1046	23.019	25.2233	25.8808	25.4642	22.8786	25.5689	22.9687	23.8761	27.1244	26.0901	24.1059	26.7601	24.8024	23.321	24.644	24.846	24.559	23.0727	23.4512	24.6372	25.7193	25.2742
F8W9W2;P43250-3;P43250;P43250-2;D6RHX8;D6RHC7;D6RDA3	F8W9W2;P43250-3;P43250;P43250-2;D6RHX8	G protein-coupled receptor kinase 6	GRK6	GRK6	23.1044	24.4184	23.7935	27.1019	26.9641	25.9472	25.4232	26.1897	23.4719	23.2123	23.0466	25.2958	22.9788	24.207	23.1671	23.8251	23.7963	23.5237	23.4897	22.2719	23.9114	23.5912	26.9028	22.5644	22.9665	22.0242	25.0188	26.8364	23.5574	22.6898	26.2708	24.2685	26.4659	23.8148	23.9042	26.9564	24.3379	22.6123	24.662	23.2079	22.3447	25.7849	24.0663	26.7021	28.2215
F8W9X7;Q567U6	F8W9X7;Q567U6	Coiled-coil domain-containing protein 93	CCDC93	CCDC93	26.6716	26.0205	23.8447	26.5477	26.8995	25.777	26.1778	26.27	26.0612	25.5252	25.9961	26.4527	26.6271	26.4839	27.4072	26.1226	26.2203	26.2516	26.3517	25.9945	21.8744	25.9445	27.8188	22.6664	24.9134	25.5148	27.2925	26.2406	26.335	26.4105	26.3385	26.707	26.6278	23.2611	26.8338	26.468	25.6441	24.2895	26.2467	27.052	26.2666	23.3086	24.7982	25.9848	24.9111
F8WCF6;P59998;P59998-3;F8WDD7;A0A0A6YYG9;P59998-2;H7C0A3;R4GN08;P59998-4;F8WE39;F8WDW3	F8WCF6;P59998;P59998-3;F8WDD7;A0A0A6YYG9;P59998-2;H7C0A3	Actin-related protein 2/3 complex subunit 4	ARPC4-TTLL3	ARPC4-TTLL3	30.423	30.0687	30.4461	30.7113	30.255	30.3705	30.3137	30.3708	30.0346	30.3246	30.4547	29.7695	30.4649	31.1525	30.9888	30.7088	30.1852	30.0951	30.5733	29.8819	31.0786	30.6503	30.0945	30.6318	30.1702	30.6585	29.9286	30.4482	30.0634	30.3896	29.8837	30.1586	31.0727	29.9613	30.463	30.5439	30.7535	30.2634	30.4992	30.2181	29.7028	30.1586	30.0131	29.7923	29.8697
F8WD26;J3KP06;E9PMT2;Q8WWI1;A0A0A0MTE2;Q8WWI1-4;Q8WWI1-2;Q8WWI1-5;H0Y424;E9PRJ0;E9PRE3	F8WD26;J3KP06;E9PMT2;Q8WWI1;A0A0A0MTE2;Q8WWI1-4;Q8WWI1-2;Q8WWI1-5;H0Y424	LIM domain only protein 7	LMO7	LMO7.1	31.6457	31.6716	31.531	31.4337	31.4096	31.3988	31.3096	31.1753	30.4314	30.2766	30.1569	30.5733	30.5288	31.2141	31.3717	30.9278	31.0695	30.916	30.9275	30.9081	30.2491	30.7702	30.7133	30.9381	31.3596	30.8252	31.3459	31.0208	31.5794	31.1107	31.0473	31.2398	31.2009	31.4303	31.4272	31.2449	30.9971	31.2223	31.1887	31.5165	31.277	31.5768	31.5724	31.3529	31.559
F8WJN3;Q16630-3;Q16630;Q16630-2;F8W084;A0A3B3ISW1	F8WJN3;Q16630-3;Q16630;Q16630-2	Cleavage and polyadenylation specificity factor subunit 6	CPSF6	CPSF6	26.1849	26.1016	25.642	26.2632	26.2823	26.2811	26.0498	26.4867	25.6833	26.2895	26.17	26.0546	25.5411	27.2704	26.3318	26.9156	26.3657	26.2374	26.4027	25.8465	25.0283	24.4005	26.5106	27.0455	25.4601	26.5079	25.9516	26.0915	25.5476	26.1687	26.4651	25.6015	25.2153	26.8919	26.7604	26.9979	23.296	24.4483	26.2254	26.3357	25.2385	24.1504	24.9759	26.769	25.7114
G3V0I5;P49821-2;P49821;E9PQP1;E9PPR0;E9PPS5;E9PPE0	G3V0I5;P49821-2;P49821	NADH dehydrogenase [ubiquinone] flavoprotein 1, mitochondrial	NDUFV1	NDUFV1	34.5564	34.5745	34.7143	34.1969	34.0828	34.2924	34.6413	34.449	34.9332	34.7824	34.8401	34.6871	34.827	34.072	34.565	34.7106	35.0458	34.8495	34.8955	34.7606	34.9989	35.0026	34.4314	34.4974	34.3691	34.4585	34.756	34.8054	34.4197	34.8307	34.9738	34.8507	33.9546	34.7612	34.214	34.5097	34.3863	34.7034	34.1262	34.7385	34.7608	34.3565	34.3014	34.6613	34.2419
G3V126;H0YB41	G3V126	#N/A	ATP6V1H	ATP6V1H	27.5656	28.169	27.5268	27.6183	27.9999	28.1763	27.8764	27.3894	27.8931	27.8733	28.0331	27.8539	27.2687	27.8596	27.6682	28.0255	28.0232	27.8066	28.2258	27.715	27.9307	27.9339	27.6705	27.9922	28.009	28.6724	28.2322	27.8999	27.8162	28.0192	27.9642	27.9503	27.888	28.1039	27.0773	28.2758	28.3684	27.4326	27.7189	28.1697	27.7838	27.0268	27.518	27.0691	27.1221
G3V1L9;Q07157;H0YKB1	G3V1L9;Q07157	Tight junction protein ZO-1	TJP1	TJP1	30.3081	30.2284	30.3884	30.3185	30.3213	30.1585	30.0861	29.7106	29.6355	29.6199	29.5192	29.9285	29.9324	29.8951	29.8652	29.5921	29.7558	29.7903	29.9975	29.5022	29.808	29.8901	30.0362	29.9575	30.187	29.8653	30.7194	30.0144	30.328	30.3295	30.1205	30.1518	30.5466	30.5874	30.0902	30.1132	29.6623	30.4031	30.5859	30.5695	30.2752	30.0141	30.3474	30.2237	30.4446
G3V2U7;P07311;G3V3F8	G3V2U7;P07311	Acylphosphatase;Acylphosphatase-1	ACYP1	ACYP1	25.2509	26.0989	25.8992	26.0778	26.0719	26.5449	25.7957	25.7174	25.8774	22.4772	26.4499	24.9246	24.8707	25.8785	26.9858	24.3814	25.7327	23.7269	24.7248	25.5192	25.9709	25.8853	25.9053	25.3695	26.2717	25.2393	25.5188	26.9343	26.5658	25.2932	25.6549	26.6089	25.8767	25.4914	25.4729	25.8727	23.7382	23.6657	26.1876	22.9913	24.9115	25.9088	23.4	24.9902	25.3396
G3V2W1;Q9UK55	G3V2W1;Q9UK55	Protein Z-dependent protease inhibitor	SERPINA10	SERPINA10	24.7178	25.0924	25.6649	26.7447	25.6636	25.6497	24.6164	24.7469	23.0012	25.4247	23.9125	26.8077	24.8471	25.3684	23.2093	25.9786	22.7129	24.0545	23.2015	25.6696	24.4777	25.6132	21.6561	23.7569	24.8461	27.193	25.1984	25.6649	25.0216	23.716	23.4052	23.1373	24.3773	26.316	23.6678	26.9101	22.297	22.595	26.5769	24.3621	23.9021	23.3699	24.0596	24.3804	22.5816
G3V325;O75127;C9JJT5;C9JU26;P56134-4;P56134-2;C9JQN9;C9JGL8	G3V325;O75127	Pentatricopeptide repeat-containing protein 1, mitochondrial	ATP5MF-PTCD1	ATP5MF-PTCD1	33.1646	33.076	33.5414	32.9119	32.9366	33.8004	33.4936	33.6849	33.8157	34.3661	34.1345	33.5612	34.7101	33.9458	34.4794	33.9295	34.2661	34.1973	33.9986	33.5469	34.9788	34.0895	34.2022	34.4706	33.2924	33.9351	34.4355	33.172	34.011	33.997	33.75	34.0618	30.7475	33.8839	33.1349	33.7908	33.7832	34.0931	32.857	34.0155	34.0806	33.7945	32.7841	32.5266	32.9919
G3V3G9;Q5TAQ9;V9GY54;Q5TAQ9-2;Q5TAQ8;H0YDY4;V9GYQ9;Q5TAQ6;V9GZ39;Q5TAQ7;Q5TAQ5;V9GYZ9	G3V3G9;Q5TAQ9;V9GY54	DDB1- and CUL4-associated factor 8	DCAF8	DCAF8	27.1355	26.3161	26.9984	26.1587	26.0117	26.016	26.949	23.3514	22.1494	23.7216	26.7526	26.1953	26.9038	26.8573	27.2045	25.5905	26.1668	23.4996	26.8451	26.3626	27.0459	26.7071	26.3454	22.8189	26.6377	26.6207	26.9857	26.8948	26.6352	26.4611	26.7728	26.1075	24.9062	26.5019	23.8288	21.8682	28.9195	26.9871	22.0799	24.1476	27.0651	23.0237	26.4091	24.0448	25.9461
G3V3X5;Q14767;G3V511	G3V3X5;Q14767;G3V511	Latent-transforming growth factor beta-binding protein 2	LTBP2	LTBP2	28.3557	31.907	28.7313	32.735	30.5685	31.1684	30.6046	23.0641	26.8236	27.1617	27.5595	28.6229	28.1266	27.2771	25.962	28.0621	25.4969	27.54	25.319	27.6739	23.8632	26.1239	28.3284	28.2302	29.6432	29.5307	22.1607	29.484	30.203	27.817	26.6422	28.4466	32.4731	25.9356	30.3376	29.1787	27.2108	25.9913	31.2262	29.0886	23.9137	28.1529	28.941	31.7574	30.1752
G3V4C1;P07910-2;B2R5W2;G3V4W0;B4DY08;P07910-4;G3V5X6;G3V3K6;G3V251	G3V4C1;P07910-2;B2R5W2;G3V4W0;B4DY08;P07910-4;G3V5X6;G3V3K6;G3V251	Heterogeneous nuclear ribonucleoproteins C1/C2	HNRNPC	HNRNPC	31.1981	30.9451	30.6793	31.1591	30.9157	30.7652	30.2712	30.7155	30.5957	30.9832	30.7189	30.9396	30.4857	31.0621	30.8433	31.7823	31.1104	30.9296	30.7971	30.7307	30.5231	30.8626	30.529	30.8979	30.7301	30.8131	30.6386	30.7762	30.7528	30.6535	30.7712	30.8224	31.2865	31.227	30.9462	31.0753	30.9419	30.8075	31.0164	31.5629	30.8619	30.5422	30.3344	31.0832	30.383
G3V4U0;Q9UBX5;G3XA98;G3V3Y2	G3V4U0;Q9UBX5;G3XA98	Fibulin-5	FBLN5	FBLN5	30.3397	29.2288	29.7377	30.0537	30.6485	31.6516	30.6036	29.3368	30.0099	30.7712	29.4923	29.7549	30.1594	29.7704	29.253	29.9864	29.4964	29.0229	29.0195	29.2283	29.8964	30.4507	30.5859	29.0398	29.6943	30.6949	30.4547	31.6149	31.716	30.0247	30.7347	30.7388	32.7503	29.7675	30.8804	31.5963	29.0841	29.451	31.2704	29.7389	30.7725	30.3596	29.0988	31.4578	30.5925
G3V4Y7;G3V5G2	G3V4Y7	#N/A	KTN1	KTN1	28.2096	28.9879	28.437	27.831	27.7505	28.5338	28.6895	28.2847	26.9837	29.0046	27.7718	28.7283	24.4313	27.5432	28.0759	27.8976	28.2417	28.553	28.4097	27.8017	27.4035	27.2812	27.8135	27.1172	28.6245	28.1601	26.3182	28.126	29.7223	28.596	29.4246	28.5085	24.1947	28.2243	29.0552	27.8509	23.8075	28.4888	26.1928	29.2256	27.8568	26.8666	26.1307	25.3322	27.3078
G3V5Z7;P60900;G3V295;P60900-2;G3V3I1;P60900-3;G3V3U4;H0YJC4;G3V4S5;G3V2S7	G3V5Z7;P60900;G3V295;P60900-2;G3V3I1;P60900-3	Proteasome subunit alpha type;Proteasome subunit alpha type-6	PSMA6	PSMA6	30.5617	31.1862	30.9494	30.919	31.4347	30.8752	30.9573	30.5658	31.303	30.8791	30.6768	30.76	30.4783	30.9587	30.6915	31.4786	30.8257	30.8302	30.8702	30.8466	30.4878	30.7734	30.6797	30.7471	31.2056	31.0467	31.0821	30.7872	31.2816	31.6505	31.0776	31.463	31.0241	30.8566	31.0017	31.1052	29.739	31.2999	31.1355	31.7255	31.0976	30.0437	30.8155	31.0809	30.8559
G3XAG1;Q96ME7-3;Q96ME7;Q96ME7-2	G3XAG1;Q96ME7-3;Q96ME7;Q96ME7-2	Zinc finger protein 512	ZNF512	ZNF512	22.9961	24.09	24.1506	22.8747	22.657	25.1653	22.5227	28.2402	28.9556	22.8637	23.49	23.1846	22.916	23.7967	28.0704	24.0199	23.2809	23.1522	23.6052	24.8707	27.2194	24.3404	23.6601	24.6236	23.6879	23.7692	24.3843	30.0033	29.8482	23.5441	29.1551	28.5813	30.0637	30.0889	29.6444	29.2324	23.6978	22.1627	29.6828	23.7298	24.939	23.6082	24.814	28.4275	22.5921
G3XAH0;B4DJ62;C9JM82;Q99719-2;F8W9E5;H7C299	G3XAH0;B4DJ62;C9JM82;Q99719-2	Septin-5	SEPT5	SEPT5	23.9803	25.168	24.9737	25.7591	24.2852	23.5837	24.3343	23.8803	24.4259	24.0613	24.3793	25.9358	23.5267	24.3078	25.2249	25.1429	23.9309	24.8219	25.0726	25.3425	25.6067	25.267	24.8485	24.7288	25.0861	24.5882	25.4659	25.0505	25.1423	23.4359	23.785	24.4702	25.1551	24.7143	24.4373	24.5998	24.6077	24.988	26.3493	24.4918	26.0084	24.0888	23.0505	23.2625	21.9612
G3XAI2;P07942;E7EPA6;E9PCS6;C9J296	G3XAI2;P07942	Laminin subunit beta-1	LAMB1	LAMB1	33.6199	32.9455	33.4416	32.7379	32.9904	33.0685	32.9832	33.4723	33.5218	33.6405	33.5976	33.6295	33.4746	32.0253	33.2602	33.615	33.9642	33.7075	33.6875	33.1371	33.6266	33.3208	33.0921	33.1596	33.1946	33.0095	33.9207	33.2637	33.6548	33.6443	33.6998	33.6538	33.1287	34.0196	33.1297	33.75	33.4222	33.6763	32.5093	33.6154	33.7633	32.9256	32.8466	32.8577	32.5183
G3XAK1;P26927;H7C0F8	G3XAK1;P26927	Hepatocyte growth factor-like protein;Hepatocyte growth factor-like protein alpha chain;Hepatocyte growth factor-like protein beta chain	MST1	MST1	24.8548	23.0095	24.8639	26.1504	23.6295	24.5999	24.4628	24.2907	22.2428	23.6289	24.4697	23.4291	25.0237	24.6337	24.5264	24.1929	24.8909	24.0854	24.5026	25.1294	23.5508	23.265	23.6249	23.3605	25.0663	24.2389	24.6791	25.893	25.5256	23.6039	24.1067	25.237	26.3521	24.4845	24.9983	25.7847	22.5884	25.459	25.8209	24.8357	24.6582	24.7502	23.0431	22.6582	23.0932
G3XAP6;P49747-2;P49747	G3XAP6;P49747-2;P49747	Cartilage oligomeric matrix protein	COMP	COMP	24.1884	31.9257	23.8775	32.3029	26.532	22.1289	27.0552	25.3357	24.3848	23.941	24.7647	22.9206	23.3141	23.1781	22.7112	22.8307	21.8976	23.4283	21.9939	22.6518	21.342	24.2417	26.1473	23.1418	24.7472	21.3829	22.5921	23.336	26.6663	22.9682	24.0182	21.8579	31.1531	18.5929	20.891	24.8202	24.5306	19.4986	26.8667	21.947	21.6413	21.7024	23.3228	28.9197	22.2372
G5E950;P15502-11;E7EP82	G5E950	#N/A	ELN	ELN.1	24.758	25.538	27.1386	24.0656	24.7601	25.347	22.9916	23.4882	23.9136	25.7243	25.0141	23.4965	24.9487	25.2988	22.5139	25.0028	24.1136	24.2527	23.551	24.9276	24.3481	22.8471	21.9148	26.3118	26.2037	26.456	25.1349	23.596	28.8912	23.5454	24.3023	27.8737	28.1332	23.723	27.6881	24.9393	24.7549	23.7367	24.3559	27.671	22.4194	24.2218	22.348	24.8314	22.7605
G5E9Q6;P35080-2;C9J0J7;C9JQ45	G5E9Q6;P35080-2;C9J0J7;C9JQ45	Profilin;Profilin-2	PFN2	PFN2	27.765	26.5588	28.3361	27.5831	27.9866	27.5026	27.4793	27.5721	27.8031	28.0245	26.154	27.8694	26.1698	28.6278	27.7127	28.1282	27.9474	27.9913	28.1427	27.6763	26.0017	27.4812	22.2283	26.5744	26.6044	26.9693	28.1888	27.2401	28.2403	27.4392	27.9213	27.3484	28.5925	27.6114	28.9455	27.3966	27.2272	28.5968	29.1705	28.2704	27.4914	27.6652	28.2897	27.7391	27.5972
G5E9W7;G5E9V5;P82650;H7C5F2;P82650-2;H7C5L9;C9J5D8	G5E9W7;G5E9V5;P82650	28S ribosomal protein S22, mitochondrial	MRPS22	MRPS22	29.6479	29.9545	29.5288	29.6466	29.6353	29.2167	30.012	30.0508	30.3634	30.3072	30.3171	30.1999	30.4396	30.2037	29.6334	29.8956	30.124	30.0072	30.5214	29.686	30.6185	30.3289	29.7183	29.6505	29.882	30.0712	29.8061	29.8056	30.3461	31.0657	30.4842	30.6633	29.7933	29.8927	30.5114	29.9854	29.2376	29.8035	29.5251	29.9571	30.2797	29.976	29.5789	29.6408	29.0268
G5E9Z2	G5E9Z2	#N/A	CLPTM1L	CLPTM1L	23.5248	24.6552	23.2579	24.236	23.7907	25.25	23.6102	24.4305	22.7033	25.1123	24.0076	23.3356	24.4511	26.9156	23.065	25.435	23.6214	25.7545	26.0094	25.6001	26.1642	23.4625	23.2623	24.2933	25.028	23.0419	24.0034	23.8549	26.0702	23.6035	22.5921	24.7005	24.4475	23.7888	25.1047	23.0753	23.2775	23.3737	24.5031	23.174	25.8472	23.2145	23.6058	24.8259	22.2582
G5EA03;Q9UPQ0-3	G5EA03;Q9UPQ0-3	LIM and calponin homology domains-containing protein 1	LIMCH1	LIMCH1	25.0211	24.696	24.7187	24.535	24.6991	24.2557	25.2024	25.163	22.9693	25.6656	24.284	24.056	23.6092	23.3806	24.6871	24.2475	23.1703	26.0055	23.3419	23.2628	23.0418	24.5278	24.2697	25.148	23.174	23.5309	23.953	24.2807	25.1307	24.3395	24.4895	23.7229	22.454	25.0974	24.6009	23.3953	23.5636	22.9413	23.0216	24.1774	21.8914	22.489	22.3975	27.3849	24.8541
G5EA30;Q92879-4;Q92879-5;E9PKU1;F5H0D8;F5H3J7	G5EA30;Q92879-4;Q92879-5	CUGBP Elav-like family member 1	CELF1	CELF1	21.9504	29.505	22.7681	28.2928	26.2176	24.1641	27.1666	26.4541	27.5183	22.4928	23.6128	23.8899	23.7694	23.0233	26.7685	27.9092	23.3635	23.5429	22.381	26.9263	24.6553	24.8323	24.9286	27.4973	23.79	24.4925	27.7096	27.3558	27.5119	27.7792	26.0798	26.0116	26.5188	27.4155	24.3741	24.5604	24.0081	23.5635	25.9792	24.7875	24.0445	23.0543	24.446	25.3543	23.8881
G8JLB6;P31943;E9PCY7;D6RBM0;D6RIU0;D6RFM3;D6RIT2;E7EQJ0;D6RAM1;D6R9T0;E7EN40;D6RDU3;D6RJ04;D6RIH9;H0YB39;E5RGV0;H0YBD7;D6RDL0;H0YBG7;D6RF17;E5RGH4;H0YAQ2;D6R9D3;E5RJ94	G8JLB6;P31943;E9PCY7;D6RBM0;D6RIU0;D6RFM3;D6RIT2	Heterogeneous nuclear ribonucleoprotein H;Heterogeneous nuclear ribonucleoprotein H, N-terminally processed	HNRNPH1	HNRNPH1	31.3345	31.0297	31.0491	31.0618	30.5882	31.0238	30.6777	31.3561	30.5797	30.8672	30.4217	30.6798	30.87	31.4812	31.2712	31.706	30.9282	30.6956	31.0977	31.0291	30.5453	30.776	30.6709	31.0594	30.7357	31.3292	31.1232	30.1296	31.1512	31.1422	31.0247	31.1132	31.4769	31.3571	30.96	31.1484	30.4015	30.4343	30.8772	30.9651	30.8553	31.0692	31.0389	31.402	30.8517
H0UI06;P14406;D6R9C3	H0UI06;P14406;D6R9C3	Cytochrome c oxidase subunit 7A2, mitochondrial	COX7A2	COX7A2	32.8028	32.8737	33.002	32.8328	32.881	33.1034	32.9695	33.0161	33.3754	32.6358	33.0096	32.6413	33.399	32.3502	29.8914	31.8019	32.9589	32.95	33.32	30.4981	31.5846	32.3681	32.8151	31.5086	31.7287	33.4106	32.1234	33.3743	33.3697	31.9205	33.4093	31.5742	33.65	32.5998	32.7987	33.2081	33.5786	32.0581	32.1647	32.1817	33.119	34.5068	34.349	34.2079	32.7365
Q5QPK2;H0Y368;O60762;Q5QPJ9	Q5QPK2;H0Y368;O60762;Q5QPJ9	Dolichol-phosphate mannosyltransferase subunit 1	DPM1	DPM1	26.2484	25.7135	27.4134	26.3823	26.5349	26.5997	27.1294	25.3144	25.2952	27.3532	26.4563	26.0612	28.0741	26.8119	27.8912	27.5284	25.7281	26.6901	25.8811	26.4095	25.7902	23.7507	26.4302	26.9127	26.0611	26.4857	26.6937	26.9994	27.0039	25.1258	26.6935	26.2795	27.3839	26.9988	26.3999	25.7794	26.53	26.5548	26.7339	27.6694	27.0331	27.0618	26.2921	24.8416	23.4577
P0DP25;P0DP24;P0DP23;H0Y7A7;E7ETZ0;E7EMB3;Q96HY3;G3V361;M0QZ52;F8WBR5;G3V226;G3V479;C9J7T9;P02585	P0DP25;P0DP24;P0DP23;H0Y7A7;E7ETZ0;E7EMB3;Q96HY3;G3V361	#N/A	CALM3	CALM3	31.8968	31.8999	31.2789	32.3789	31.6928	32.1872	31.8439	31.02	31.6708	32.463	32.4318	32.0268	32.555	31.193	31.1436	31.685	32.7944	32.4759	31.9666	31.9912	32.7932	32.7943	32.593	31.6563	31.7787	31.2571	32.0145	32.1532	32.1906	32.1786	31.594	32.0405	33.3838	32.5932	32.2615	31.8525	32.8758	32.3598	32.8348	27.8957	32.5126	32.24	31.7332	32.2634	32.662
H0YC42;U3KQQ8;E5RFR7;H0YC44;P55327-8	H0YC42	#N/A	MRPS28	MRPS28	27.4573	28.0287	28.036	27.7654	27.6865	27.1042	27.5659	27.7046	27.593	27.7447	26.6913	27.3294	27.5044	27.6072	27.002	27.8328	28.1815	27.2802	27.7093	27.2292	27.9229	28.5105	27.5997	27.4284	28.0735	27.9837	28.6536	26.895	27.5046	27.3829	27.4594	27.5676	27.7923	27.9289	27.5472	27.3293	27.4208	27.601	27.3465	27.0799	28.1301	27.0938	27.2053	28.2021	27.7253
H0YDN1	H0YDN1	#N/A	PLEC	PLEC	27.0634	26.4349	26.9497	23.911	26.5669	26.5212	22.3271	26.9016	26.8064	26.4762	26.1088	26.8598	26.3188	26.3349	27.0314	25.6322	26.3134	26.6491	26.3154	26.1174	26.0264	26.988	26.528	25.5678	27.2466	26.9666	26.874	27.0532	27.0134	26.7256	26.8484	26.5902	22.4225	26.5471	27.3776	26.8751	28.0858	26.0055	22.5239	25.922	26.3811	25.9869	22.1825	23.8142	26.3232
H0YFD6;P40939;A0A2R8Y4F5;A0A2R8YG21;A0A2R8Y688;P40939-2	H0YFD6;P40939;A0A2R8Y4F5;A0A2R8YG21	Trifunctional enzyme subunit alpha, mitochondrial;Long-chain enoyl-CoA hydratase;Long chain 3-hydroxyacyl-CoA dehydrogenase	HADHA	HADHA	37.0082	36.318	36.6458	36.4226	36.1564	36.4285	36.7721	36.7166	36.6032	37.5371	36.9585	37.1761	36.9236	36.1069	36.9082	36.5957	37.3051	37.1926	36.8816	36.7323	37.0839	36.8511	36.767	36.707	36.7305	36.6526	36.833	36.4642	36.7263	36.6161	36.8944	36.8319	35.9652	36.8222	36.5394	36.5546	36.8381	36.9519	35.829	36.8522	37.0358	36.9549	36.4327	36.3929	36.6054
H0YI08;Q9Y6F6-5;Q9Y6F6-4;Q9Y6F6;Q9Y6F6-7;Q9Y6F6-3;Q9Y6F6-1;Q9Y6F6-2;Q9Y6F6-6;Q9Y6F6-8;E9PJ61;H0YCL0	H0YI08;Q9Y6F6-5;Q9Y6F6-4;Q9Y6F6;Q9Y6F6-7;Q9Y6F6-3;Q9Y6F6-1;Q9Y6F6-2;Q9Y6F6-6;Q9Y6F6-8	Protein MRVI1	MRVI1	MRVI1	28.5895	28.3375	23.2917	26.959	26.7895	24.2414	28.7419	26.7638	25.7029	26.1543	25.4219	22.5476	22.7382	24.1381	25.3521	24.184	26.5816	23.5416	23.6458	27.0132	22.85	26.6094	28.1057	24.2706	26.6966	26.3995	23.2633	27.5345	29.2559	27.0572	26.897	28.5637	25.7215	27.3974	24.0274	27.5658	25.472	23.455	24.7257	22.3388	23.9017	26.9825	23.2147	24.0506	26.5667
H0YKD8;P46779;P46779-2;P46779-3;H0YMF4;P46779-4;P46779-5;H0YLP6	H0YKD8;P46779;P46779-2;P46779-3;H0YMF4;P46779-4;P46779-5;H0YLP6	60S ribosomal protein L28	RPL28	RPL28	28.9987	28.1967	29.02	28.815	28.3003	28.018	28.23	28.4572	28.5717	28.5163	28.6629	28.5478	28.2652	29.2191	28.7445	29.8861	27.4419	28.4325	27.9058	29.0501	28.714	28.4475	28.3702	29.3652	28.5653	27.6134	27.8029	28.1357	28.5061	28.2749	28.1395	27.9226	28.3074	28.0607	27.6308	27.5991	28.462	28.4159	29.4035	28.4958	27.0222	27.9635	29.3568	29.0863	29.0054
H0YKJ4;H0YK48;P09493-5;H0YN06	H0YKJ4;H0YK48;P09493-5	Tropomyosin alpha-1 chain	TPM1	TPM1	27.7922	27.18	27.0012	27.2093	27.3878	26.8252	27.1622	27.3467	27.2399	27.0465	26.6918	26.7948	27.0753	27.1886	27.483	28.1899	27.3849	27.0981	27.2654	26.8976	27.1014	27.9604	27.4311	26.8386	26.6439	27.0796	27.3277	27.0318	27.9119	28.2039	27.2953	27.382	28.6173	27.3025	28.5399	26.961	26.7747	26.8387	28.0953	27.3256	26.6267	28.961	29.1316	28.1465	26.7281
H0YM25;A0A0G2JRP8;A0A0G2JP21;Q8N7Z2	H0YM25;A0A0G2JRP8;A0A0G2JP21;Q8N7Z2	Golgin subfamily A member 6-like protein 22;Golgin subfamily A member 6-like protein 1	GOLGA6L22	GOLGA6L22	24.8764	23.4889	22.7766	24.927	25.0317	22.3212	26.5849	24.9875	28.4482	23.4236	22.5188	23.1484	23.8965	22.4027	27.3892	27.326	25.8669	23.528	23.6668	22.8721	27.4518	24.1021	23.1496	25.2954	23.6089	24.0333	27.6827	27.1554	26.6023	24.7458	24.2983	25.0824	22.7368	26.3937	23.9964	24.4767	24.2419	25.9351	24.7468	26.1344	24.5656	24.808	22.4088	24.1131	24.7097
H0YMV8;Q71UM5;C9JLI6;C9J1C5	H0YMV8;Q71UM5;C9JLI6	40S ribosomal protein S27;40S ribosomal protein S27-like	RPS27L	RPS27L	27.6209	27.325	26.9518	27.6238	28.1894	27.8237	27.9071	28.0942	27.9862	28.2996	27.2239	28.2293	27.4371	27.1209	27.4001	28.4277	29.0131	27.6598	27.2959	27.4083	27.4895	27.3014	27.858	27.1354	23.7852	28.2886	27.5189	25.6379	27.4017	28.385	27.5046	28.4651	28.2832	25.8396	28.1565	27.8362	27.4225	27.141	25.0191	28.0402	27.5712	27.4771	27.4438	26.8099	26.7797
H0YNG3;P67812-4;P67812;P67812-3;H0YKT4;P67812-2;H0YNX5;H0YNA5	H0YNG3;P67812-4;P67812;P67812-3;H0YKT4	Signal peptidase complex catalytic subunit SEC11;Signal peptidase complex catalytic subunit SEC11A	SEC11A	SEC11A	27.5213	26.5318	27.3264	26.9234	26.9518	27.5082	27.6891	27.5994	27.5828	28.0704	27.9058	26.607	27.6152	28.0124	27.9135	27.8945	26.4232	26.6214	26.5945	26.6488	28.4807	27.1874	27.5365	27.7965	27.8169	27.7468	27.4251	26.4955	27.7277	27.5971	27.1762	23.2099	23.282	26.8059	27.1068	26.956	22.2171	26.9995	27.3613	27.5257	26.7993	26.4207	25.6198	25.5588	26.0728
H0YNK8;Q5J8M3-2;Q5J8M3;S4R329;H0YK61;H0YNK0;H0YLP8;Q5J8M3-3;H0YMH5;H0YN63	H0YNK8;Q5J8M3-2;Q5J8M3;S4R329;H0YK61;H0YNK0;H0YLP8;Q5J8M3-3	ER membrane protein complex subunit 4	EMC4	EMC4	23.8922	22.4573	24.7656	25.267	23.7654	23.1347	26.3146	25.3449	23.9277	25.6844	25.5871	23.5438	25.0534	25.2504	24.1868	25.3501	23.9553	23.9791	23.6219	24.0741	24.7844	22.7228	25.3468	23.6928	24.0965	25.2012	24.7149	24.0893	24.1224	25.7778	22.3287	25.4009	24.1563	22.5016	24.4062	24.1258	24.7732	23.7128	26.3781	25.4247	24.1895	25.1421	25.5311	23.1395	24.2544
H3BMD8;P56211;P56211-2;H3BQ52;H3BTD3	H3BMD8;P56211;P56211-2;H3BQ52;H3BTD3	cAMP-regulated phosphoprotein 19	ARPP19	ARPP19	27.8128	27.5073	28.4925	27.5953	27.7385	27.8621	28.4056	27.7023	27.3158	27.5579	27.6247	27.3969	28.5814	28.2933	28.2933	26.9456	28.4617	28.0095	28.5835	28.3699	28.0858	28.3504	28.1069	27.5574	26.318	28.3379	27.6852	27.8326	28.1465	27.6186	28.1394	27.4547	27.7732	27.7654	28.4951	27.7106	27.7349	27.9964	28.0702	27.5411	27.7303	27.3795	27.3425	27.5785	27.6202
H3BNC9;P08708;H0YN88;A0A075B716;H0YN73;A0A0J9YYC4	H3BNC9;P08708;H0YN88;A0A075B716	40S ribosomal protein S17	RPS17	RPS17	29.5624	29.3788	29.6735	29.5189	29.5778	29.4726	29.4999	29.8435	29.8015	30.5251	30.9708	29.9061	30.2511	30.947	30.2855	30.7915	30.1581	30.0204	29.9198	30.5465	30.267	30.3959	30.3654	30.5554	29.6101	30.19	30.3	29.4473	30.3347	30.1753	29.9877	30.0609	28.9951	29.815	29.2312	30.087	30.2797	30.3141	29.7855	30.1823	29.7594	28.9109	28.9701	29.2444	29.0135
H3BP20;P06865;H3BS10;H3BU85;H3BTD4;P06865-2;A0A087WUJ7	H3BP20;P06865;H3BS10	Beta-hexosaminidase;Beta-hexosaminidase subunit alpha	HEXA	HEXA	27.4765	28.5304	28.2782	28.2425	28.8806	28.0131	28.942	28.4536	28.7885	28.938	28.6789	28.0255	28.9338	29.2458	28.6829	28.2563	28.2103	28.3601	28.7275	28.9841	29.1705	28.3859	28.1855	28.712	28.5424	28.9394	28.4734	26.4325	28.9066	28.876	28.4694	28.7538	28.7485	28.5541	28.6467	29.0922	26.3521	28.7685	26.8226	26.9996	28.3275	27.9364	26.918	27.5993	28.1884
H3BP28;Q99807;I3L1T0;H3BS11	H3BP28;Q99807	5-demethoxyubiquinone hydroxylase, mitochondrial	COQ7	COQ7	29.8061	30.2177	30.936	30.0157	30.2732	30.4354	30.6036	30.5419	30.689	30.8564	30.5282	30.8108	31.4214	30.0012	30.7127	30.1766	30.6944	30.9373	30.9755	30.604	30.9531	30.966	30.1547	30.801	30.2837	30.7435	31.0491	30.4267	30.5129	30.9349	31.0299	31.0135	30.3554	30.559	30.2439	30.2746	29.6049	30.6858	30.0267	30.6224	30.8307	30.6096	30.7961	30.6468	29.9198
H3BPE1;H3BQK9;E9PNZ4;E9PLY0;H0Y4F5;H0Y6T5;H0Y7I1;E9PS75	H3BPE1;H3BQK9	#N/A	MACF1	MACF1	29.4237	29.3203	28.6255	28.624	28.7605	30.3403	29.8801	29.6155	28.8317	28.7495	28.7215	29.2526	29.0286	31.8093	31.1666	30.3142	29.1502	28.7519	28.6298	30.9179	28.6569	30.1908	29.1217	31.1041	30.2244	28.7379	29.9224	29.288	29.3252	28.6967	29.4408	28.8408	29.1678	28.9736	29.5194	29.657	30.7581	29.0385	29.3476	30.2385	29.307	28.0819	29.9077	27.5343	29.09
H3BRL3;O14562;H3BUM8	H3BRL3;O14562;H3BUM8	Ubiquitin domain-containing protein UBFD1	UBFD1	UBFD1	26.9504	26.9646	24.7268	26.4074	27.148	27.0092	26.6763	25.3758	23.9302	25.7445	27.1795	23.0899	25.7781	26.6991	26.7864	25.2254	25.2144	25.7549	26.3691	23.6875	26.4762	22.8258	26.1982	21.9945	26.9116	24.058	26.5006	24.0377	26.7353	26.6374	26.3754	27.3593	27.4483	26.3728	27.2049	26.2175	24.1877	26.1516	25.6991	27.046	26.5	26.6225	27.1155	28.3827	26.3829
H3BRN4;P80404;H3BNQ7;H3BPW8;H3BMJ9;H3BRJ1;H3BRT1	H3BRN4;P80404;H3BNQ7	4-aminobutyrate aminotransferase, mitochondrial	ABAT	ABAT	30.9148	30.6139	31.08	31.6921	31.7289	31.2078	30.935	30.241	29.9386	30.4457	32.3631	29.9283	30.2762	30.6932	31.5139	29.7285	30.5836	31.0121	29.4833	30.3973	33.0978	30.9295	30.4009	30.8274	30.6521	31.4228	30.0421	30.6954	31.8739	31.3573	31.4465	31.3041	31.8542	30.7802	30.1955	31.4292	31.7485	29.7915	29.7958	31.3027	29.9614	29.9896	30.3186	30.2663	31.0308
H3BRN7;H3BTY4	H3BRN7;H3BTY4	#N/A	CLN6	CLN6	27.9982	25.7539	27.9536	27.0237	27.3754	27.9138	23.5575	27.5316	27.0047	27.3971	22.5808	25.2637	23.1706	25.3201	29.505	22.0862	23.6695	26.0719	24.439	24.6756	27.2412	26.5122	24.1752	23.1884	28.1835	25.8405	28.7276	23.9728	23.3838	25.2328	28.7781	27.8873	24.9639	24.1048	26.1675	26.8113	22.5569	26.8032	28.0067	25.3734	24.9075	28.3666	28.2885	27.4252	27.0474
H3BSM7;Q96GQ5;H3BR29;I3L2V0;H3BTA0;H3BS97	H3BSM7;Q96GQ5;H3BR29	RUS1 family protein C16orf58	C16orf58	C16orf58	23.114	23.5916	26.8609	24.6174	23.687	26.5918	25.068	25.2684	24.3096	26.0614	24.2692	23.2253	24.9293	24.6835	27.3731	26.3061	24.2464	26.7011	25.5119	24.662	27.2054	23.5633	27.2545	26.8865	26.8175	22.948	26.9066	25.85	26.3313	23.2732	25.7112	23.4488	24.228	23.7799	23.8503	22.194	22.7065	25.7299	27.4928	24.4546	26.2685	23.3264	21.3716	23.8579	24.2986
H3BTH8;Q96S86;H3BRY4;H3BT26;Q86UW8	H3BTH8;Q96S86	Hyaluronan and proteoglycan link protein 3	HAPLN3	HAPLN3	24.4661	26.6718	25.8738	27.973	27.3355	28.4841	27.6046	23.9935	24.4418	22.9984	24.8706	23.0743	22.2349	22.3828	24.5711	22.9298	23.6134	23.125	26.4594	24.0314	24.4924	24.7599	23.2736	25.1164	25.7081	26.1579	23.3879	24.7632	23.7641	22.9468	24.506	24.0408	27.3675	25.5935	23.0166	26.8943	25.4425	24.2403	23.9306	25.4478	25.0487	23.2182	23.4127	22.9611	26.7204
H7BYZ3;F6U1T9;D3YTA9;P63098;A0A1B0GUC7;Q96LZ3	H7BYZ3;F6U1T9;D3YTA9;P63098	Calcineurin subunit B type 1	PPP3R1	PPP3R1	26.0851	25.8718	27.0577	23.7703	22.8825	26.7684	24.3164	26.799	23.6734	26.9302	27.0778	26.2565	26.5037	26.8557	27.23	26.4371	27.459	27.0209	27.2829	26.6691	27.7786	27.2007	27.3866	26.9576	26.9905	27.7787	27.7737	26.4426	27.0753	27.5039	26.1952	27.3186	24.7451	27.1767	27.1503	27.0765	26.3784	26.1363	25.4559	23.798	25.1495	26.0775	26.4386	26.046	26.2659
H8Y6P7;P0CAP1-11;P0CAP1-2;P0CAP1-7;P0CAP1-6;P0CAP1-8;P0CAP1-5;H3BTD5;H0YCD3	H8Y6P7;P0CAP1-11;P0CAP1-2;P0CAP1-7;P0CAP1-6;P0CAP1-8;P0CAP1-5	Myocardial zonula adherens protein	GCOM1	GCOM1	31.0219	30.7607	31.1955	30.9626	30.916	30.6154	30.9676	30.694	30.3948	30.6648	30.0642	30.0115	30.339	29.9201	30.3842	29.8525	30.7181	30.6247	30.8439	30.1765	30.7452	30.3299	30.5374	30.1388	31.1322	31.0003	31.4604	31.0281	31.4434	31.2695	30.904	31.3334	30.9146	31.2267	31.2261	31.0854	30.4043	31.1546	30.4725	31.5126	31.0174	30.8586	30.8569	30.875	30.6199
I3L0E3;Q9Y2R5;E9PE17	I3L0E3;Q9Y2R5;E9PE17	28S ribosomal protein S17, mitochondrial	hCG_1984214	hCG_1984214	26.1099	27.1374	26.8715	22.5878	24.1685	25.7473	22.0685	25.9498	23.6129	27.3122	27.1643	26.9575	27.4139	23.5643	23.656	26.3437	27.1357	26.9726	27.798	27.3834	27.775	28.1584	26.2449	26.9289	27.3864	27.7431	25.9299	26.6883	28.1501	28.0604	27.92	27.6951	27.8785	27.4666	27.2141	27.8851	27.5888	27.0225	24.4502	27.3588	27.6435	27.4605	27.503	24.1263	26.1039
I3L0N3;P46459;P46459-2;I3L2G1;I3L0L3;K7EQD6;I3L338;I3L4Q9	I3L0N3;P46459;P46459-2	Vesicle-fusing ATPase	NSF	NSF	29.1939	29.1283	28.7855	28.9876	28.9059	29.8234	29.1658	29.0598	28.703	29.1952	28.9014	29.1011	28.6403	29.3096	28.8852	29.517	28.4686	28.2204	28.5534	29.1426	29.0964	28.4772	28.6528	29.1716	28.5896	29.1824	27.855	29.2869	28.8787	29.6942	28.8712	28.98	30.0443	29.2308	30.0659	29.2832	28.8951	28.1013	28.9276	29.1488	28.7231	29.1272	28.5939	28.5819	29.1763
I3L448;Q5TC12;A8MRA7;Q5TC12-3;H0YEW4;Q5TC12-2;H0YD21;H0YDD6;E9PPX6;H0YCA6	I3L448;Q5TC12;A8MRA7;Q5TC12-3;H0YEW4;Q5TC12-2;H0YD21	ATP synthase mitochondrial F1 complex assembly factor 1	ATPAF1	ATPAF1	30.5822	30.3455	30.1137	30.5423	30.3369	30.6236	30.7771	30.3911	30.4407	30.8141	30.6784	30.852	30.2429	30.1095	30.1966	30.055	30.2598	30.1097	30.1569	29.7327	30.3535	30.1855	30.2789	29.6059	30.1204	30.3226	29.4233	30.0387	30.1311	30.8009	30.659	30.7083	30.7366	29.904	30.5098	30.0639	29.7672	30.0229	29.1811	29.6905	30.5347	30.6618	29.5895	29.6032	29.9387
I6L894;D6RHE1;A0A087WZU3	I6L894;D6RHE1	#N/A	ANK2	ANK2	31.2123	31.5173	31.0834	30.8566	31.4938	31.2252	31.039	30.9732	31.1989	31.1296	30.7818	31.1872	30.7888	30.7675	30.9349	31.1532	31.7482	30.6811	31.4499	31.0501	31.333	31.4875	31.1505	31.102	31.1232	31.8276	31.2548	30.9951	31.2882	31.6494	31.3869	31.47	31.332	31.6306	31.3579	31.3684	30.6803	31.4074	31.0937	31.6467	31.2948	31.0402	31.1542	31.0956	31.0129
J3KN01;H0Y9I0	J3KN01	#N/A	AFDN	AFDN	27.5652	28.1951	27.5808	27.4989	26.3928	27.1544	27.3691	27.444	27.7936	27.153	27.1646	27.749	26.833	27.5156	27.8045	27.5948	27.8386	27.3729	27.9079	27.1315	27.9951	27.9509	27.3492	26.8357	28.0936	28.3424	27.5725	27.9329	28.3865	28.105	27.916	27.4943	28.4218	28.441	28.0909	28.1015	27.0827	27.9898	27.8729	27.8376	27.7936	27.5276	28.0887	27.1385	27.2204
J3KN59;Q12982;Q12982-2;H7C096;Q86WG3;Q86WG3-3	J3KN59;Q12982;Q12982-2;H7C096	BCL2/adenovirus E1B 19 kDa protein-interacting protein 2	BNIP2	BNIP2	23.641	24.2756	24.1905	23.5958	23.8713	24.6907	24.0143	25.1127	25.1077	24.1627	25.2526	25.0352	24.3675	24.0488	24.1275	24.231	23.3315	23.7367	24.1021	22.4247	23.3728	23.5889	24.5063	25.6239	26.0131	24.4366	23.7308	23.1664	24.5515	24.8885	23.4065	23.1987	24.7954	23.8673	23.4617	22.3106	24.3337	25.1851	25.0939	24.9909	24.9791	24.5876	24.6213	24.5754	23.4576
J3KN67;D6RGJ6	J3KN67	#N/A	TPM3	TPM3	28.4992	27.6877	27.5582	28.2131	27.8902	28.0258	27.0471	28.2538	25.016	27.5122	26.9098	26.6211	27.1842	28.7622	27.2192	28.2817	28.0335	27.5489	26.8399	27.3452	27.5107	27.7368	25.9381	26.9648	27.4799	26.8564	27.9301	26.7547	28.0123	27.7819	26.8204	27.8946	28.7643	26.7651	28.1153	27.8958	28.2693	27.1028	28.0946	26.1264	25.2017	27.9431	27.8482	26.7863	26.9092
S4R3Q9;J3KNA0;Q15070-2;Q15070;E7EVY0;C9JC63;Q15070-3	S4R3Q9;J3KNA0;Q15070-2;Q15070;E7EVY0	Mitochondrial inner membrane protein OXA1L	OXA1L	OXA1L	26.9991	26.9556	27.2253	26.91	27.4626	27.6513	27.7354	26.7561	27.5857	27.0015	27.3296	27.28	27.2277	26.6123	26.23	27.5216	26.6179	26.6807	26.7946	27.0169	27.8263	26.2591	27.0724	26.2752	27.2266	28.7353	26.2556	26.8053	26.7317	27.9475	27.1968	27.8345	27.3533	27.535	26.9472	27.1875	26.3687	27.7925	26.6006	27.6105	27.4882	26.7867	27.2082	27.6477	27.1223
J3KNF4;O14618;E9PP76;E9PK03	J3KNF4;O14618	Copper chaperone for superoxide dismutase	CCS	CCS	28.3676	29.143	29.4369	28.9326	27.401	28.3628	29.1062	28.2414	28.1815	27.8184	28.05	34.0892	26.7427	26.325	29.6976	29.3846	28.4215	27.1077	26.2262	27.6632	28.1805	27.3808	28.737	28.7152	28.5516	28.9228	29.1723	28.3263	28.1503	28.2425	28.0275	21.8975	28.3016	28.7523	29.336	29.0494	27.7877	28.8952	29.6621	27.3451	28.579	30.2014	28.8386	29.4094	28.2122
J3KNF8	J3KNF8	#N/A	CYB5B	CYB5B	30.8816	30.6764	30.9251	30.6577	30.7556	30.7522	30.7864	30.7538	30.644	31.0041	30.3474	30.6974	30.5325	30.0966	30.5616	30.4512	30.1507	30.4583	30.5871	30.4413	30.6068	30.4603	30.4554	30.4592	30.6263	30.6967	31.1571	30.3883	31.0941	30.8436	30.8019	31.2981	30.9161	31.0618	30.7435	30.5286	29.7767	30.3843	30.1633	29.2572	29.4541	30.0903	30.1987	30.1585	30.3209
J3KNN3;P15735-2;P15735;H3BTW6;H3BTI9;H3BN16	J3KNN3;P15735-2;P15735;H3BTW6	Phosphorylase b kinase gamma catalytic chain, liver/testis isoform	PHKG2	PHKG2	25.5447	23.6849	26.6564	23.873	24.0848	26.2826	26.0368	25.2441	23.3224	26.4002	26.8219	26.5649	25.5748	25.696	25.3503	22.4902	26.3634	25.9643	25.354	26.6572	25.6294	26.5445	24.171	25.3702	25.645	22.626	26.9932	24.3711	25.5209	23.5363	26.7933	23.5236	26.0308	25.5517	24.0418	25.28	22.2504	25.6173	22.8743	24.6987	25.5733	23.466	24.1323	23.5724	21.6532
J3KNQ4;Q9NVD7;E9PS97;Q9NVD7-2	J3KNQ4;Q9NVD7;E9PS97	Alpha-parvin	PARVA	PARVA	31.2359	31.3786	31.3172	31.2916	31.3157	31.6113	31.2792	30.8262	31.1037	31.2061	30.8707	31.1665	31.1345	31.5148	31.2935	30.9188	31.3246	31.3719	31.2607	31.1375	31.261	31.166	30.84	30.8387	31.2515	31.4111	31.3163	31.6142	31.4669	31.3303	31.289	31.084	31.5559	31.6957	31.6719	31.3093	30.8095	30.9764	31.7923	31.4348	31.6902	30.922	31.0314	30.9834	31.2596
J3KNS1;Q9UPW5;Q9UPW5-2;Q9UPW5-3	J3KNS1;Q9UPW5;Q9UPW5-2;Q9UPW5-3	Cytosolic carboxypeptidase 1	AGTPBP1	AGTPBP1	24.0971	24.0964	22.4336	24.5662	23.2696	21.2586	22.0641	24.3439	24.9182	23.6005	28.5703	24.2098	24.7381	23.4254	29.0377	22.5304	27.9344	22.6562	30.6653	27.8085	28.6484	31.2734	28.8395	23.297	27.9008	26.7213	28.2701	22.482	23.6566	24.192	27.2783	25.0398	24.065	25.3805	23.6735	23.0235	24.3443	24.775	24.1509	22.6222	23.8241	27.9858	28.3189	27.5481	26.7614
J3KNV4;Q13683-7;Q13683;Q13683-9;Q13683-10;G3V2C6;G3V2I4;H0YJ26	J3KNV4;Q13683-7;Q13683;Q13683-9;Q13683-10	Integrin alpha-7;Integrin alpha-7 heavy chain;Integrin alpha-7 light chain;Integrin alpha-7 70 kDa form	ITGA7	ITGA7	31.9495	32.09	31.8631	31.7834	32.0044	32.0602	32.0232	31.5292	32.1614	32.0052	31.8904	32.0493	31.7507	31.9037	31.5698	32.1053	31.4647	32.0137	31.6691	32.085	31.6911	32.0108	31.6513	32.2967	32.1597	31.4931	32.2358	31.8759	31.9145	31.5009	32.2	32.0037	31.7794	31.9339	32.1203	31.6935	31.6282	32.0038	31.7012	32.3055	32.1818	31.9495	31.9097	31.4468	31.4646
J3KPF0;F8VWT9;Q9Y4D8-4;Q9Y4D8;Q9Y4D8-2;Q9Y4D8-5;Q9Y4D8-3;F8VU57	J3KPF0;F8VWT9;Q9Y4D8-4;Q9Y4D8;Q9Y4D8-2	Probable E3 ubiquitin-protein ligase HECTD4	HECTD4	HECTD4	27.4786	27.9752	29.5074	28.6199	28.451	29.1702	28.8057	27.9602	28.4892	29.914	29.3225	28.1694	29.7372	29.0886	28.5687	27.85	27.4447	28.6407	28.6909	29.4767	29.9261	26.8478	27.7774	30.1347	29.4763	30.351	30.2498	30.8408	30.2799	28.6398	30.457	28.7084	29.8125	30.6563	28.7586	29.9084	29.0759	28.817	25.4639	30.0045	30.9488	28.8714	28.4475	30.1374	27.8
J3KPL8;O00213-2;O00213;A0A075B7G8;A0A087X0V7;A0A087WYH9;O00213-4;O00213-6;O00213-3;O00213-5;V9GY97;V9GYR7;V9GYD5	J3KPL8;O00213-2;O00213;A0A075B7G8;A0A087X0V7;A0A087WYH9;O00213-4;O00213-6;O00213-3;O00213-5;V9GY97	Amyloid beta A4 precursor protein-binding family B member 1	APBB1	APBB1	24.2067	24.1176	23.9697	25.7842	25.3604	23.0201	23.2492	25.4348	22.9956	25.6268	24.0146	24.3364	25.9963	27.0757	23.516	25.9493	26.2204	23.6194	25.0231	25.556	23.6508	25.1891	23.4955	25.0943	25.3865	24.7909	26.1745	24.0822	26.2158	21.9512	23.6336	25.1696	24.9511	24.131	24.6252	25.8137	24.0109	24.8214	24.0709	25.7185	23.7891	22.8632	23.2584	26.155	24.4365
J3KPP4;O95232;D6RDI2;E7EN55;C9JL41;O95232-2;D6RHH0;U3KQT3;H0YA81	J3KPP4;O95232;D6RDI2	Luc7-like protein 3	LUC7L3	LUC7L3	25.2277	25.8409	24.1013	25.3621	25.1986	25.6508	25.1926	23.4473	25.0343	25.6865	25.4868	24.2346	24.3801	25.9834	25.1453	25.7778	25.8426	25.3098	24.1646	25.4896	25.6815	25.1905	25.5541	25.564	25.1266	25.9703	25.2719	25.7804	24.9895	25.7821	26.0836	25.1463	24.691	25.9596	24.8078	26.4702	23.8975	25.5517	25.5372	24.3623	26.2094	23.8774	21.5931	27.0781	24.8923
J3KPT4;Q9H4I3;Q9H4I3-2	J3KPT4;Q9H4I3;Q9H4I3-2	TraB domain-containing protein	TRABD	TRABD	23.4199	24.6828	25.513	21.8337	24.4521	24.1677	24.383	23.9689	23.802	26.0098	23.3298	24.2002	23.3909	23.5251	24.6739	23.8536	22.9853	22.8604	23.3296	25.7364	23.2183	24.9564	23.5951	24.4289	26.0868	25.564	25.743	27.1171	24.3347	24.3071	27.241	27.6825	24.0006	23.0404	23.9515	27.8012	22.6774	26.6838	25.0267	25.6361	24.8807	24.3459	24.3429	22.3525	23.3146
J3KPV1;Q9BUK0;Q9BUK0-2;Q9BUK0-4;E5RJ08;E5RHM5;E5RFN2;E5RII1	J3KPV1;Q9BUK0;Q9BUK0-2;Q9BUK0-4	Coiled-coil-helix-coiled-coil-helix domain-containing protein 7	CHCHD7	CHCHD7	27.0748	24.3422	28.6335	26.5106	23.1478	26.8751	27.9499	25.7308	27.6478	27.6901	27.2247	28.2234	27.272	26.0553	28.135	26.9643	25.4443	27.4602	27.7872	27.5432	27.9636	27.3567	25.4693	26.5742	27.4459	25.8245	28.3421	26.8599	27.6223	27.8687	27.6528	28.4036	28.7303	23.555	28.3811	27.4356	26.8135	28.3577	26.5767	27.5497	28.0144	27.7274	26.0827	27.4494	23.4096
J3KQ32;Q9NTK5;Q9NTK5-3;Q9NTK5-2;C9JTK6;C9JCJ9	J3KQ32;Q9NTK5;Q9NTK5-3;Q9NTK5-2	Obg-like ATPase 1	OLA1	OLA1	31.6743	32.0025	32.258	32.0615	32.1466	31.9179	32.1625	32.116	32.3401	31.9382	31.9108	32.1048	31.9997	32.188	32.1422	31.6601	32.0754	31.9652	32.2537	31.9172	31.9343	31.9074	32.3992	32.074	32.0061	32.1733	32.0756	32.005	32.262	32.3481	32.0859	32.0612	31.287	32.0277	31.6066	32.0854	31.4984	32.234	31.7027	31.7751	32.3095	31.6928	31.5084	31.8548	31.6221
J3KQ48;Q9Y3E5	J3KQ48;Q9Y3E5	Peptidyl-tRNA hydrolase 2, mitochondrial	PTRH2	PTRH2	26.8818	26.8591	26.9383	23.8354	26.1724	26.8612	26.2477	26.4067	26.8271	27.0698	27.2099	26.8591	25.8149	26.4204	26.9659	27.2438	27.7449	27.4889	27.0081	25.9397	26.239	26.7674	27.2849	26.7235	26.6828	27.0635	26.2246	26.8386	26.3175	26.1099	27.367	26.3624	27.7009	26.3004	27.487	26.8134	23.0249	25.7966	26.173	26.1893	25.7204	26.0612	26.2152	23.4713	26.0358
J3KQA9;Q5JR59;Q5JR59-4	J3KQA9;Q5JR59;Q5JR59-4	Microtubule-associated tumor suppressor candidate 2	MTUS2	MTUS2	28.7364	28.3898	24.9262	27.4881	27.8744	27.6108	28.4943	28.6794	28.5038	28.8832	27.8737	28.3524	27.6167	27.3821	27.4865	29.1031	29.0389	28.2848	29.3841	28.9684	29.2212	27.8151	27.2891	28.6858	28.0771	28.4157	28.9916	28.6756	29.1159	27.4196	28.4132	28.5078	28.8604	28.8699	27.643	28.4639	27.8619	28.7362	27.7499	28.2313	28.9071	29.2249	28.5425	28.6528	27.9892
J3KQJ1;Q8NBJ7;A8MXB9;Q8NBJ7-2;E9PBT8;C9JL30;C9J660;J3QT17;H7C3B2;F8WA42;Q8NBJ7-5;Q8NBJ7-3;F8WEX5;E9PG02;F8WEV7;F8WES7;Q8NBJ7-4	J3KQJ1;Q8NBJ7;A8MXB9;Q8NBJ7-2;E9PBT8;C9JL30;C9J660;J3QT17;H7C3B2;F8WA42;Q8NBJ7-5;Q8NBJ7-3	Sulfatase-modifying factor 2	SUMF2	SUMF2	25.9389	22.5401	24.341	27.0354	23.7901	27.3799	21.9586	27.3398	24.2947	26.8258	26.8956	25.3789	25.1508	27.2248	24.2798	26.3715	23.6291	22.9601	25.7555	23.1656	26.1885	23.3804	26.3784	26.549	25.0258	28.0503	24.6413	21.2281	26.7948	26.8908	23.4015	27.3269	26.8398	30.8703	26.1663	28.5108	24.4771	26.1283	27.2584	25.9062	26.2949	22.4207	21.9317	24.7265	23.8039
J3KQL8	J3KQL8	#N/A	APOL2	APOL2	25.2358	25.3904	25.699	24.5474	23.7002	25.3886	23.3876	23.7394	24.1377	24.0865	23.912	24.6008	23.6827	25.058	24.615	25.4112	23.8725	23.1973	25.2006	25.1116	24.674	23.995	22.7759	22.5094	23.7795	24.9714	25.4772	23.473	23.9625	24.9401	22.7258	25.1535	25.0467	23.9988	25.6161	25.0948	25.216	25.2119	23.6845	23.8287	24.544	24.9423	24.5472	24.1916	25.1596
J3KQN4;H0Y5B4;H7BZ11;P83881;H7BY91;H0Y3V9	J3KQN4;H0Y5B4;H7BZ11;P83881	60S ribosomal protein L36a	RPL36A	RPL36A	24.7773	24.0535	20.254	26.5675	24.9829	25.6647	24.8718	26.5214	24.9581	22.5219	26.9255	25.5364	23.2359	26.523	22.8355	25.2345	24.6345	23.1667	23.6661	26.7589	23.2771	25.1169	25.562	23.116	23.8125	24.7212	25.064	25.3127	23.3696	24.0627	24.4355	25.8628	24.4016	25.0207	22.3032	23.4112	26.526	21.6632	23.8646	24.1823	21.4595	24.6994	23.8667	23.8664	25.0605
J3KR35;Q8WUD4;C9JUN5;S4R331	J3KR35;Q8WUD4;C9JUN5	Coiled-coil domain-containing protein 12	CCDC12	CCDC12	27.6091	24.1949	27.6476	26.6819	24.0732	29.0749	23.7624	22.7864	26.6274	24.233	23.9767	24.1036	24.9634	26.4348	23.514	22.5124	24.438	26.067	25.2723	22.1173	22.1873	24.2435	22.8832	23.0931	23.4975	22.6357	23.0826	22.9079	24.9568	29.7723	26.2651	30.0578	24.8431	24.2348	24.6871	21.5351	23.801	22.2222	23.8436	27.2005	27.2012	22.4105	25.9854	26.661	23.2864
J3KR44;Q96FW1;F5H6Q1;F5GYJ8;F5H3F0	J3KR44;Q96FW1;F5H6Q1;F5GYJ8;F5H3F0	Ubiquitin thioesterase OTUB1	OTUB1	OTUB1	30.8971	30.8421	30.5463	30.8382	30.4512	30.8189	30.5477	30.5356	30.3597	29.6778	30.324	29.631	30.3673	30.6058	30.4885	30.1736	30.29	29.8618	29.9792	29.7256	30.5359	30.3611	30.3473	30.046	30.4118	30.5438	30.0854	30.3929	29.8922	30.0166	29.9229	30.2226	30.8755	30.4459	30.1928	30.6137	30.1751	30.5392	30.2026	29.8285	30.7483	30.4484	30.8536	30.1587	30.3361
J3KSS5;Q6QEF8-4;Q6QEF8-3;J3QRV4;K7ERF4	J3KSS5;Q6QEF8-4;Q6QEF8-3	Coronin;Coronin-6	CORO6	CORO6	26.8788	27.0697	28.3538	26.4796	26.7265	26.9362	26.913	26.0243	26.6721	22.7302	26.2995	25.6977	26.752	23.5408	26.6324	25.7747	24.2165	26.2692	26.7464	26.3727	26.5375	26.1838	26.7767	26.9738	28.2954	25.9701	27.5009	22.0588	26.7154	26.7695	26.3934	22.5793	23.5655	26.9763	26.7811	27.1672	22.7563	26.2978	24.4874	27.6782	25.8396	26.8324	26.2104	25.9479	27.4931
J3KTL2;Q07955;Q07955-3;Q07955-2;J3KSR8;J3QQV5;J3KSW7	J3KTL2;Q07955;Q07955-3;Q07955-2	Serine/arginine-rich splicing factor 1	SRSF1	SRSF1	28.7028	27.7745	28.4882	27.7968	28.002	28.4462	27.8497	26.4476	27.8654	27.2214	27.8642	28.0776	27.1558	28.1001	28.1774	27.9532	27.3322	26.9837	27.231	26.9228	28.446	28.1545	27.6614	27.2409	25.9754	27.6391	26.7638	27.6169	27.3381	27.1484	27.7149	28.0454	28.935	27.949	28.0293	27.7418	27.6161	28.0999	28.1215	28.2825	27.9542	27.2998	28.091	27.5432	27.1496
J3QL71;Q96FV2;Q96FV2-2;J3QQM9;J3QRJ1;J3QR84;J3KT79;J3KS57	J3QL71;Q96FV2;Q96FV2-2;J3QQM9;J3QRJ1	Secernin-2	SCRN2	SCRN2	29.6271	28.7763	29.6119	29.7908	29.2999	29.3983	29.5989	29.1736	29.2271	28.7603	28.4901	29.2289	29.2107	29.3362	29.3285	28.2831	29.3575	29.0039	28.7745	28.0689	28.9206	29.7431	28.9049	28.345	29.6453	29.6098	29.9567	29.1881	29.2197	28.3604	28.9835	29.2683	28.7376	29.1192	28.6157	29.5308	28.8456	28.4001	29.2578	29.0653	29.7826	29.3628	29.7052	29.2545	29.5433
J3QLS3;Q9Y2R9;J3QQS1;J3KSI8;J3QKW2	J3QLS3;Q9Y2R9;J3QQS1;J3KSI8;J3QKW2	28S ribosomal protein S7, mitochondrial	MRPS7	MRPS7	29.2026	29.3677	29.6463	29.4664	29.6679	29.5426	29.4522	29.9464	29.8211	29.9904	29.1116	29.4436	29.917	29.6745	29.0025	29.5594	29.8563	29.4513	30.1648	29.2252	29.8548	29.4633	29.6824	29.2642	29.7333	30.2044	30.1125	29.6073	30.0317	30.2611	29.7539	29.989	29.6587	29.4795	29.5071	29.7226	27.3295	30.0606	30.1369	29.9764	29.5402	29.2535	29.2141	29.4397	28.5746
J3QRS3;P19105;J3KTJ1	J3QRS3;P19105;J3KTJ1	Myosin regulatory light chain 12A	MYL12A	MYL12A	32.1836	32.582	32.3478	32.7195	32.412	33.1959	32.4409	33.0583	31.615	32.5152	31.7784	32.0121	32.8417	33.9233	34.1278	33.3399	31.9797	31.8471	31.8123	33.7092	32.6801	32.1885	31.9873	34.044	32.7004	32.2335	32.3338	33.0955	32.6776	32.3384	32.5222	32.1506	33.9919	32.7269	33.0981	32.3984	32.7632	31.9518	33.4729	31.8659	32.9185	31.862	31.8125	31.6912	32.0447
J3QRS9;X6R4W8;O43670-2;O43670;O43670-4;O43670-3;J3KS31;J3QS27;J3KTL1;J3KRB6;J3KRW6;H0Y3M2	J3QRS9;X6R4W8;O43670-2;O43670;O43670-4;O43670-3;J3KS31	BUB3-interacting and GLEBS motif-containing protein ZNF207	ZNF207	ZNF207	23.9299	23.978	25.1801	23.3487	25.1498	25.2104	22.1326	25.2798	24.7881	24.8245	23.9835	25.4864	25.6497	24.9182	26.0494	25.6234	23.1023	24.3703	25.326	25.2176	22.9435	24.9566	22.739	24.7511	21.6454	24.1144	25.4619	25.3502	24.0047	23.5657	24.4535	25.043	25.0914	25.4063	25.6618	25.3085	28.0227	24.9946	25.3542	25.599	24.2838	25.4596	24.1079	25.2909	25.9205
J3QRT5;P13598;J3QQR8;J3QQX6;J3QRQ1;J3QKR4	J3QRT5;P13598;J3QQR8;J3QQX6;J3QRQ1;J3QKR4	Intercellular adhesion molecule 2	ICAM2	ICAM2	26.0405	23.498	25.2889	25.77	25.7598	25.6436	25.8197	26.6181	27.3997	26.7757	27.186	25.645	27.3176	27.2874	27.2753	27.7791	27.9936	27.051	27.156	26.6971	28.0445	28.0855	27.6531	26.6373	26.6475	27.5403	26.7172	26.8138	25.4761	26.5264	26.7451	28.3862	26.0705	26.4563	27.026	27.2639	27.9518	26.9548	26.8806	26.9144	26.7466	25.1135	26.3189	24.6775	25.3781
J3QRU1;P07947;Q573B4;P06239;P06239-3	J3QRU1;P07947	Non-specific protein-tyrosine kinase;Tyrosine-protein kinase Yes	YES1	YES1	26.1101	26.3211	23.8944	25.5687	26.0462	26.3589	26.0695	25.9037	26.1913	26.01	26.7887	25.14	25.6085	25.6208	26.5407	26.7213	25.7722	25.1651	26.238	26.5345	27.162	26.8136	26.1527	26.0117	26.5325	26.4355	26.4191	26.0831	26.7136	25.4425	26.1541	25.3712	26.9045	25.8658	26.4904	25.9599	27.9873	26.0904	26.2694	25.4355	26.5171	25.9613	26.0552	23.3802	25.4116
J3QTA6;Q9BRQ6;J3QTB2;H0Y922	J3QTA6;Q9BRQ6;J3QTB2;H0Y922	MICOS complex subunit MIC25	CHCHD6	CHCHD6	28.2247	28.3449	28.5825	28.7592	28.8973	28.9444	28.7728	27.338	28.2747	28.5877	27.9584	28.9715	28.5765	27.2851	29.0391	28.4943	27.8754	28.2016	28.3826	28.3609	27.9125	28.653	27.854	28.7756	27.697	28.1457	28.6233	27.9979	28.8718	28.4464	28.1541	28.6435	28.4855	28.4396	28.0565	27.3422	26.6064	29.0002	27.6186	29.018	23.7108	28.9147	28.8385	28.7694	28.591
J3QW43;J3QS48;I3L295;J3KTK8;J3QQZ4;J3KT75;J3QRD5;O75352-2;O75352;J3KSI4;I3L405;I3L261;I3L1D2;I3L4E0	J3QW43;J3QS48;I3L295;J3KTK8;J3QQZ4;J3KT75;J3QRD5;O75352-2;O75352	Mannose-P-dolichol utilization defect 1 protein	MPDU1	MPDU1	25.9434	26.6594	25.5225	24.6808	24.6735	25.0068	23.7101	24.4992	24.5728	23.3249	26.3976	23.4305	26.306	27.2757	26.4786	27.0922	25.4302	23.7072	25.599	25.5299	26.5746	25.5005	24.9482	26.1083	25.7035	24.7062	25.5677	24.8752	24.4225	27.1665	24.6641	25.7781	23.9994	23.8355	24.6915	24.001	23.8309	25.9962	25.1716	26.2926	25.0564	22.8171	24.1804	25.54	25.5264
J9JIE6;Q9UM00-2;Q9UM00;J3QQY2;J3KS45;J3KTQ7	J9JIE6;Q9UM00-2;Q9UM00;J3QQY2;J3KS45	Transmembrane and coiled-coil domain-containing protein 1	TMCO1	TMCO1	23.0969	23.1795	24.2797	23.9783	23.6924	24.7084	24.7017	24.3595	24.7042	26.1758	25.5458	24.4507	25.2793	24.6784	27.4317	25.5784	25.6902	24.8675	23.9211	24.7783	26.5986	25.4851	23.4439	27.1279	23.9902	26.02	24.1475	23.8818	24.4109	23.3761	25.3306	24.5467	26.7244	26.0133	23.9097	23.9161	24.3006	24.2797	24.2678	25.4711	26.1342	27.0619	22.617	24.1714	24.1235
K7EKE6;P36776-2;P36776;K7EJE8;P36776-3;K7ER27;K7ERR6;K7EQF8;K7ER56	K7EKE6;P36776-2;P36776;K7EJE8;P36776-3	Lon protease homolog, mitochondrial	LONP1	LONP1	33.618	33.3901	33.5894	33.1038	33.3865	33.663	33.4184	33.7047	33.575	33.9737	33.8338	33.4712	33.7188	33.2828	33.5668	33.6716	33.756	33.8736	33.5198	33.7408	33.8049	33.6204	33.5348	33.6944	33.5028	33.5945	33.9271	33.3875	33.786	33.5455	33.9278	33.827	33.0309	33.8736	33.0371	33.6872	33.4676	33.4116	32.5616	33.9609	33.7358	32.8505	33.1459	33.1629	33.0187
K7ELC2;P62841;K7EM56;A0A0B4J2B4;S4R417;K7EQJ5;K7EJ78;S4R456	K7ELC2;P62841;K7EM56;A0A0B4J2B4;S4R417;K7EQJ5	40S ribosomal protein S15	RPS15	RPS15	29.5545	29.5102	29.8054	29.9104	29.4998	29.3102	29.9959	29.9871	29.7363	30.3429	30.3706	29.6783	30.6426	31.5719	31.0996	31.2624	30.4327	30.1347	30.3439	30.8049	30.9427	30.9648	30.3193	30.6053	30.2725	30.846	30.585	30.2598	30.071	30.246	30.1377	29.223	30.2793	30.0127	29.2456	30.3563	31.7946	30.2893	30.4275	29.7914	30.1477	26.5866	25.9248	24.2534	28.3749
K7ELG9;Q3MHD2;Q3MHD2-2	K7ELG9;Q3MHD2;Q3MHD2-2	Protein LSM12 homolog	LSM12	LSM12	26.8231	26.2971	26.445	27.4275	25.7117	26.5459	26.8039	27.4783	23.831	23.9225	27.4531	27.9183	23.005	23.3996	24.2661	26.6566	26.1181	24.1845	25.1039	26.7974	21.9568	28.0142	27.1231	23.8346	24.6884	24.878	24.2824	26.3317	26.5601	26.8873	23.9757	27.3898	24.7397	28.247	25.0499	26.9684	23.1369	28.7833	24.4676	23.808	23.8239	27.1347	24.0193	24.8285	25.5285
K7ELL7;P14314;K7EPW7;K7EKX1;K7EJ70;K7EIP3;K7EL27	K7ELL7;P14314;K7EPW7	Glucosidase 2 subunit beta	PRKCSH	PRKCSH	31.741	31.3905	31.7076	31.6319	31.5854	31.7023	31.9151	31.1	31.4445	31.243	31.4016	31.0333	31.1518	31.8698	31.2613	31.8281	30.7904	31.0246	30.9664	31.5795	31.3048	30.94	31.0451	31.3064	31.4962	31.3015	31.734	30.9298	31.8766	31.3832	31.9853	31.5872	32.0124	31.5962	31.7731	31.3223	30.7391	31.2914	31.6684	31.2918	31.4934	31.3264	31.44	31.5867	31.3772
K7EMC9;Q969T9;K7ENL2;A6NG10;Q969T9-2;K7EIJ0;K7EIN1;K7ESN4;K7EIK1	K7EMC9;Q969T9;K7ENL2;A6NG10;Q969T9-2;K7EIJ0	WW domain-binding protein 2	WBP2	WBP2	28.2397	28.7018	28.7734	28.5368	28.7046	28.5359	28.8358	28.613	28.7181	27.6625	27.1059	28.4652	28.6104	29.2475	28.6465	28.2772	28.1103	28.4205	28.7623	28.9494	27.9315	28.1899	28.5825	28.8675	28.2932	28.2791	28.6203	29.2788	28.2206	28.4365	28.9438	28.731	27.9941	28.6851	28.9849	28.8688	26.4047	28.9644	27.5825	27.689	28.4869	28.1303	28.4128	28.7961	27.8381
K7EMR7;O75298-3;O75298;O75298-2;Q7RTN0	K7EMR7;O75298-3;O75298;O75298-2;Q7RTN0	Reticulon;Reticulon-2	RTN2	RTN2	26.1786	28.2397	28.1209	27.2712	28.2384	28.096	28.2159	27.7784	28.3615	29.1879	27.5102	28.5875	29.2176	28.1854	27.2506	28.5707	28.0573	29.6397	28.4323	27.5001	28.8662	28.3473	28.471	28.5815	28.2468	28.5488	29.9403	28.2244	27.7056	28.5956	27.6693	28.5278	28.1957	27.7973	28.5949	28.5265	27.5275	28.7005	28.498	28.881	29.2397	27.3891	27.761	26.1939	27.5429
K7ENI6;K7ERE1;Q8N2U0	K7ENI6;K7ERE1;Q8N2U0	Transmembrane protein 256	TMEM256-PLSCR3	TMEM256-PLSCR3	28.9199	27.2147	27.9272	27.9139	27.1974	24.6418	28.2198	28.184	28.8832	28.6575	27.9671	28.3942	28.4693	27.4229	26.9995	28.4784	28.7948	28.8364	28.8042	29.3031	29.5366	29.7021	27.8905	29.3161	28.2295	28.1342	29.2362	26.4855	27.023	27.9786	28.4196	28.0931	28.5166	26.8461	27.0733	26.1491	27.469	31.3284	23.4291	28.5263	28.7437	27.0966	27.0597	24.6492	27.3162
K7ER74;A0A024R0T9;P02655;Q6P163;V9GYJ8;K7EMC3	K7ER74;A0A024R0T9;P02655;Q6P163	Apolipoprotein C-II;Proapolipoprotein C-II	APOC4-APOC2	APOC4-APOC2	22.4183	23.913	26.1776	22.8301	25.0732	23.5946	23.0757	24.3277	24.1744	24.2792	22.6636	24.4927	24.2702	22.8059	23.4632	23.7111	25.557	22.7719	22.9868	25.6608	24.6553	25.8807	25.923	24.0045	23.3103	24.7588	24.164	21.5065	25.8049	21.8625	26.3099	25.8465	26.7222	24.9484	27.0809	26.2882	25.0266	24.5314	25.0263	23.5515	24.493	25.6773	23.2552	27.0988	26.2877
K7ERC8;Q06136;Q06136-2;K7EQS7	K7ERC8;Q06136;Q06136-2;K7EQS7	3-ketodihydrosphingosine reductase	KDSR	KDSR	26.4462	27.5534	26.9863	27.617	27.4747	27.2763	28.4255	27.684	27.5821	27.8898	26.9771	27.2913	26.4914	27.0397	26.5959	27.2155	27.0136	27.2301	27.353	27.4485	27.0246	27.0419	26.7212	27.0251	27.0605	25.3983	26.4183	27.4011	27.2431	27.1339	27.7232	27.2503	27.2416	26.0358	27.4352	23.1787	23.7186	25.3322	27.2413	26.142	26.7719	26.7754	26.9686	27.2639	26.9857
K7ERG9;P00746	K7ERG9;P00746	Complement factor D	CFD	CFD	26.9817	28.0644	26.92	28.5001	25.6994	25.8266	24.3704	24.6292	26.2727	23.6279	24.0586	25.8116	24.4406	24.7245	24.379	25.3751	23.0649	26.2582	26.1624	23.7371	25.086	26.9046	24.5043	23.5348	26.9072	28.5588	27.199	28.8941	27.3135	25.7215	23.3553	27.3626	28.428	27.5808	27.492	27.6122	24.8849	26.7708	29.6819	26.794	26.6859	24.0968	23.1059	26.3293	26.576
L0R6P0;P86397;A0A087WTC8	L0R6P0;P86397	Hydroxyacyl-thioester dehydratase type 2, mitochondrial	RPP14	RPP14	27.718	28.2576	24.7427	23.8049	24.305	22.7363	26.3392	26.9604	25.0403	26.1103	27.1882	24.0264	25.4543	24.0606	27.5356	27.5001	23.5214	23.007	23.3763	26.8513	27.0417	26.1682	26.4702	22.5461	24.2974	23.5783	25.1993	22.8777	27.503	24.0894	26.7848	27.7248	24.4	24.4183	24.1021	25.1874	26.1515	21.8835	24.2573	24.2601	22.6143	22.6616	24.6301	25.9668	24.1336
L0R6Q1	L0R6Q1	#N/A	SLC35A4	SLC35A4	26.7955	25.9729	26.4289	27.0612	26.8774	27.853	26.8991	26.193	26.2477	26.6734	26.7312	27.5728	28.156	27.609	26.8763	26.7213	27.2001	27.3001	26.1581	27.2222	28.7048	26.8447	25.7049	28.0158	27.5404	26.8467	28.0276	25.2796	27.9682	27.2244	27.9009	27.2947	27.2208	26.5295	27.7245	27.3013	26.9851	27.0089	25.1822	26.4444	26.8534	27.7659	27.1354	23.567	26.8579
M0QYZ2;M0R0N4;P53680;X6R390;P53680-2;M0QZ21;M0R1S0	M0QYZ2;M0R0N4;P53680;X6R390;P53680-2;M0QZ21	AP-2 complex subunit sigma	AP2S1	AP2S1	27.1501	27.0413	23.9658	27.2867	27.672	27.7473	27.0363	27.5439	27.3801	27.5665	26.8234	26.7331	26.9702	27.5119	27.4905	27.5843	26.9924	26.4719	27.4422	27.5801	27.4073	27.281	27.2075	27.567	27.1645	27.3693	26.5125	27.5825	27.8221	27.6406	27.4703	27.3988	26.8901	27.1886	26.9222	27.8583	27.2893	27.7603	27.3062	27.5395	26.9539	27.6617	27.2656	28.0214	27.1267
M0QZ12;Q96CP6-2;Q96CP6-3;Q96CP6;S4R3I2;M0R0J9	M0QZ12;Q96CP6-2;Q96CP6-3;Q96CP6	GRAM domain-containing protein 1A	GRAMD1A	GRAMD1A	25.5739	24.3433	23.6289	24.3692	23.1445	25.7142	24.1042	25.4737	25.6478	25.1013	26.39	25.5433	24.9562	24.0759	29.4012	25.8142	26.7049	26.4464	22.7483	26.0343	29.8949	27.8392	26.7854	29.107	23.8724	26.3541	27.3948	24.6443	24.346	24.4093	23.7747	25.3909	26.2422	24.2753	24.6487	24.8983	27.0636	22.9587	25.17	23.8495	22.4213	22.5818	24.9072	24.1613	26.1969
M0QZ43;P23327	M0QZ43;P23327	Sarcoplasmic reticulum histidine-rich calcium-binding protein	HRC	HRC	33.6394	33.1509	33.2193	32.7985	32.7306	32.1532	32.7951	32.1079	33.332	31.9998	32.2999	33.0881	32.8432	32.1097	33.7907	32.0626	31.8885	32.8171	32.8651	32.0984	33.5487	32.7588	31.9545	32.5096	33.6213	32.5101	33.0037	32.5066	33.1425	32.6245	32.574	32.7988	32.5196	32.477	32.7188	32.0371	31.4196	32.9498	32.9276	33.4465	33.0055	32.2149	32.4824	32.7145	33.1425
M0R0P8;Q13459-2;Q13459;M0R300;M0QZY4;M0R2J3;M0R240;M0R332;M0QXP0	M0R0P8;Q13459-2;Q13459;M0R300	Unconventional myosin-IXb	MYO9B	MYO9B	25.9173	26.6033	28.0982	26.3265	25.7804	27.0831	26.945	27.753	23.4225	24.8923	27.0411	23.7124	24.0506	26.5029	22.6925	24.3073	23.7785	27.4762	23.0653	23.501	26.6799	24.9631	27.9826	23.3153	25.1619	24.1206	26.6975	24.8531	26.7075	27.6126	23.001	27.0593	25.0042	24.9903	25.6215	26.9313	22.2858	22.73	29.7326	26.5939	23.8441	25.6636	27.3498	27.4991	26.6344
M0R117;Q02543;M0R3D6;M0R1A7;M0R0P7	M0R117;Q02543;M0R3D6;M0R1A7;M0R0P7	60S ribosomal protein L18a	RPL18A	RPL18A	28.0028	27.4969	27.7046	27.705	27.0629	27.5961	27.3987	27.6892	27.8645	27.629	29.2061	28.1693	28.3048	29.254	29.0222	28.6768	28.1838	28.4404	28.0477	28.6394	28.7229	28.5907	28.0181	28.7019	28.3093	27.1072	27.5688	28.2542	27.2791	27.1681	27.4457	28.2601	27.9562	27.5351	27.5768	27.3779	28.8432	28.5339	28.9998	29.0001	27.8056	25.4266	27.1309	27.1194	26.823
M0R208;Q16740;A0A2R8YEF5	M0R208;Q16740	ATP-dependent Clp protease proteolytic subunit;ATP-dependent Clp protease proteolytic subunit, mitochondrial	CLPP	CLPP	27.0147	27.2734	26.4075	26.9025	27.291	27.1614	26.5833	23.3319	27.0572	26.831	27.5183	26.7347	26.6625	26.1327	26.1819	27.2134	25.9046	26.2337	26.2869	26.7389	26.6678	26.3297	26.0976	27.1436	25.8016	26.6399	26.8865	26.6404	27.1378	27.6446	25.7343	28.115	27.7131	27.3086	27.45	25.7976	26.6678	26.8679	26.7491	25.9788	26.1619	27.5635	25.1498	25.9036	26.5449
M0R226;Q9BQ48	M0R226;Q9BQ48	Ribosomal protein L34;39S ribosomal protein L34, mitochondrial	MRPL34	MRPL34	24.5528	26.0068	22.3373	25.2268	23.7883	25.1071	22.7168	24.029	24.6802	24.2133	23.375	23.3202	25.9216	26.242	25.4808	26.1856	25.6839	25.7401	25.8846	25.3695	26.2687	26.6277	26.3162	24.2674	25.4667	26.2414	26.0336	23.8153	23.5252	25.3486	25.923	26.1875	24.2885	25.1401	24.4243	25.8787	21.7294	22.9348	24.6215	24.8126	22.3818	24.0434	25.676	23.9142	23.939
M0R2A0;Q5UCC4-2;Q5UCC4	M0R2A0;Q5UCC4-2;Q5UCC4	ER membrane protein complex subunit 10	EMC10	EMC10	26.9842	26.7985	26.8956	27.0907	26.7127	26.2985	26.9035	26.616	26.4515	26.473	26.148	26.6228	26.3207	26.29	26.2833	26.9338	27.0146	27.2534	25.2665	26.768	26.4517	27.2007	27.0036	26.4912	26.3233	26.3405	26.0942	26.1176	26.7914	26.153	26.9727	26.2705	25.9322	26.687	26.5978	26.422	25.9948	26.4012	26.1859	26.1462	26.7647	27.0817	26.3853	25.8122	26.2175
M0R2Z9;Q8IX01-4;Q8IX01;Q8IX01-3;M0R3F6;M0R065;M0R216;M0R2Y3	M0R2Z9;Q8IX01-4;Q8IX01;Q8IX01-3;M0R3F6	SURP and G-patch domain-containing protein 2	SUGP2	SUGP2	27.1752	26.9558	24.422	26.2511	26.0183	26.5256	26.669	26.3976	26.506	26.2134	26.2651	26.0272	26.6675	27.158	26.7196	25.7903	27.4868	26.6568	27.2966	27.0713	25.7082	26.9233	26.2813	26.2528	27.3997	26.6808	26.9869	22.9903	26.2946	27.2904	27.1077	27.4702	26.3164	27.3959	26.9215	27.0108	24.0762	27.0207	25.7709	26.4971	26.2126	23.1883	24.6012	24.0952	25.4649
O00116;A0A1B0GWA2;A0A2R8YEL0;B8ZZ81	O00116;A0A1B0GWA2;A0A2R8YEL0	Alkyldihydroxyacetonephosphate synthase, peroxisomal	AGPS	AGPS	27.533	27.2364	27.1128	26.9786	26.8424	26.7933	27.1737	27.7689	27.6545	26.8316	27.3044	26.689	26.5569	27.5603	26.9207	28.5695	26.7638	25.142	26.2666	27.3432	27.4547	27.3772	27.3399	27.6731	26.5744	26.6046	26.3942	26.8303	26.7857	27.6635	26.9659	27.3852	27.3285	25.4514	27.7312	27.2336	24.244	27.8406	26.8729	26.2308	26.9167	27.0872	27.5192	23.2617	26.8548
O00142-2;O00142;O00142-6;H3BP77;A0A0A0MSY7;O00142-3;O00142-4;O00142-5;J3KS73;J3QRP0;J3QL12;J3KRW8	O00142-2;O00142;O00142-6;H3BP77;A0A0A0MSY7;O00142-3;O00142-4;O00142-5	Thymidine kinase 2, mitochondrial	TK2	TK2	26.6713	25.3988	24.4398	24.6008	25.5982	21.9296	26.1668	22.8997	22.2613	25.8682	22.2996	25.8396	25.6553	24.7514	25.1301	23.4538	25.2173	23.3143	24.8993	25.5865	26.5413	26.2933	25.6407	24.7964	25.9245	22.9087	22.6547	24.9645	24.0847	24.5404	22.3914	23.5028	25.9916	26.6767	24.5346	21.5988	23.6756	26.379	25.3202	25.794	25.7408	23.2376	24.2381	24.4688	26.0596
O00151	O00151	PDZ and LIM domain protein 1	PDLIM1	PDLIM1	33.9467	34.0854	33.4952	33.7342	33.9179	33.937	33.6448	33.0723	32.9208	33.1315	32.5985	33.6985	32.7222	33.3416	33.5711	32.4449	33.5532	33.8937	33.7019	33.6263	32.9038	33.6746	33.5362	33.447	33.4242	33.9705	33.541	33.3951	33.614	33.4907	33.7661	33.3719	33.0345	33.327	34.0287	33.4989	33.0646	33.3327	32.1718	33.0224	33.9617	33.5598	33.8848	33.1014	33.8245
O00154-6;O00154-4;O00154-7;O00154;O00154-5;O00154-2;O00154-3;K7EKP8	O00154-6;O00154-4;O00154-7;O00154;O00154-5;O00154-2;O00154-3;K7EKP8	Cytosolic acyl coenzyme A thioester hydrolase	ACOT7	ACOT7	24.7498	24.8128	22.5786	23.7656	24.2327	22.9707	23.7481	25.0504	23.9962	23.4985	23.6493	23.0042	25.9814	27.5081	26.9391	26.7832	25.4979	23.0979	24.0793	25.4762	24.646	25.7864	24.8565	23.7849	23.0803	24.1976	23.2263	24.0567	23.5879	23.5942	24.6111	25.6882	26.2492	24.1775	24.9634	24.4854	23.7128	24.4889	23.2624	23.3276	24.7499	24.544	23.2506	24.8914	24.1253
O00159;F5H6E2;I3L501	O00159;F5H6E2	Unconventional myosin-Ic	MYO1C	MYO1C	32.7742	32.5813	32.7092	32.624	32.6526	32.9583	32.7388	32.4648	32.6393	32.9426	32.6607	32.6546	32.6162	32.6268	32.6744	32.7366	32.8309	32.5479	32.9749	32.4479	33.0049	32.729	32.6722	32.5421	32.7228	33.1517	32.9227	32.9576	32.9668	33.0492	32.9822	32.9302	33.2336	33.0509	32.9156	33.0606	32.7736	32.9908	33.2864	33.1117	33.0384	32.6954	32.4879	32.3823	32.5296
O00161;O00161-2;H3BNE1;H3BR18;H3BM38;H3BPJ0;H3BV99;H3BP15;H3BQY9;H3BNG6;H3BU94;H3BR99	O00161;O00161-2;H3BNE1;H3BR18;H3BM38;H3BPJ0;H3BV99;H3BP15;H3BQY9	Synaptosomal-associated protein 23;Synaptosomal-associated protein	SNAP23	SNAP23	28.0029	27.2925	26.9052	26.9507	26.9821	27.5082	26.972	27.1935	26.3905	26.159	26.9486	25.9523	26.2827	28.479	27.0165	26.437	27.2101	26.7397	26.7405	27.1089	26.4169	26.6769	24.2247	26.7005	26.9002	26.9832	27.3627	27.0259	27.086	26.4743	26.5962	26.9276	28.6536	26.9833	28.6958	26.8397	26.5746	26.5161	27.3644	25.5517	25.8686	27.7066	27.8959	27.6413	27.9821
O00165;O00165-2;O00165-5;O00165-3;E9PIQ7;Q5VYD6;O00165-4;O00165-6	O00165;O00165-2;O00165-5;O00165-3;E9PIQ7	HCLS1-associated protein X-1	HAX1	HAX1	27.0002	26.9537	26.3956	27.0346	26.7057	27.872	27.5884	26.5192	26.3237	28.0344	28.5459	26.6871	26.7794	27.9598	27.0123	27.6299	28.2194	27.8791	26.7939	27.8451	28.3868	27.9204	27.4113	27.2197	27.5327	27.316	27.8153	27.9545	27.8778	27.9719	27.7554	27.6219	23.6908	27.0801	22.4671	27.9207	29.1774	27.8679	27.2277	27.6315	27.7728	27.2425	24.4314	27.5122	26.7548
O00170;E9PMH2;V9GYQ3	O00170;E9PMH2	AH receptor-interacting protein	AIP	AIP	26.869	26.9499	26.315	27.0986	26.5303	26.9936	26.3752	27.0026	26.9768	27.0457	27.048	27.0697	26.2228	27.1975	26.5101	26.9819	26.8002	26.4181	26.6617	27.2421	26.1622	26.286	26.4198	26.7801	26.3552	27.6515	27.2152	26.6751	27.1042	27.0633	27.5231	27.5455	28.3008	27.0417	27.6462	27.4612	23.8471	26.3349	27.1969	26.6802	26.9052	26.8195	27.1839	23.7099	26.5615
O00178;B0QY59;F5H716;F5H257	O00178	GTP-binding protein 1	GTPBP1	GTPBP1	26.4459	27.1959	25.3008	26.2449	25.8449	24.8411	25.1251	25.9124	23.6706	26.9981	23.4047	24.7311	21.6664	25.4695	25.8355	25.1613	25.9759	25.5706	25.6602	25.3368	23.666	25.5949	25.3328	23.1728	25.5115	25.608	25.1414	25.4213	23.8308	25.5613	22.5489	26.0337	25.6905	23.1293	25.3475	26.4766	23.5101	26.3897	25.2195	25.4208	25.4046	23.4422	24.6989	24.6253	21.2813
O00186	O00186	Syntaxin-binding protein 3	STXBP3	STXBP3	27.9072	27.922	28.643	28.0508	27.6019	27.8209	28.0125	27.6775	28.4435	28.681	28.113	27.5198	28.3657	28.1118	27.7595	28.288	28.395	28.1967	28.6465	27.9172	28.824	28.4597	27.5646	28.3584	28.624	28.409	29.0277	28.5037	28.0886	28.2129	28.2069	28.2453	29.3776	29.1199	28.454	28.7166	27.8035	28.4394	28.7995	28.6101	28.3977	27.7146	28.2298	28.0834	27.5181
O00203-3;O00203;H0YBD0;F5GYB0	O00203-3;O00203	AP-3 complex subunit beta-1	AP3B1	AP3B1	27.3537	27.9375	27.1452	28.2387	28.0936	28.0283	27.9146	27.769	27.3754	27.5237	28.2187	27.7692	27.8845	28.2613	28.454	27.3192	27.9092	27.4712	27.2973	27.6846	28.3282	27.8838	27.9904	28.2776	28.6505	28.7431	26.9182	27.3525	28.3152	28.2292	27.3997	28.5718	28.9096	26.8976	28.5586	28.3483	26.1143	27.9562	27.6763	28.0065	27.1106	26.8551	27.6828	26.8976	26.8817
O00214-2;O00214;E9PN19;F6V2D4;B1ANM0;H7BXD8;Q5T3P9;E9PJ77;E9PRN3;E9PNC2	O00214-2;O00214;E9PN19;F6V2D4;B1ANM0;H7BXD8;Q5T3P9	Galectin-8;Galectin	LGALS8	LGALS8	26.314	26.5889	25.0773	26.5631	26.0319	26.8691	26.385	26.6479	26.3386	25.4289	25.9138	26.3649	26.3602	26.448	25.6661	26.4	26.6756	24.0901	26.4752	26.7365	24.9018	26.7282	26.6034	27.069	23.642	24.5827	22.7027	23.5404	25.9393	25.9072	26.304	26.6334	27.2492	24.4479	27.0825	23.7725	25.9208	26.7024	26.2583	24.742	25.2489	25.9834	26.5661	26.1114	25.632
O00217;E9PPW7;E9PKH6;E9PN51;F8W9K7;H0YDT4;Q08E91	O00217;E9PPW7;E9PKH6;E9PN51;F8W9K7	NADH dehydrogenase [ubiquinone] iron-sulfur protein 8, mitochondrial	NDUFS8	NDUFS8	33.0333	32.5913	32.52	32.1099	31.8087	32.3021	32.3987	32.6073	33.342	33.6194	33.5464	33.0664	33.4987	32.8484	32.8284	32.6784	33.2033	33.3255	33.3832	32.8511	33.4289	33.0709	33.1951	32.802	32.8498	32.721	33.3395	32.7596	32.5065	33.192	33.0955	32.7436	32.7235	32.857	31.3748	33.0377	33.3704	33.017	32.5881	31.857	32.9301	32.3814	32.5534	32.2821	31.8194
O00231;O00231-2;J3QRY4;J3QS13;J3KSW3	O00231;O00231-2	26S proteasome non-ATPase regulatory subunit 11	PSMD11	PSMD11	30.7353	30.902	30.8524	30.7547	31.0902	31.1838	30.861	30.8541	30.7441	30.989	31.0874	30.6094	30.6754	31.2368	30.8435	30.8373	30.7022	30.6485	30.4508	30.8464	30.9368	30.6091	30.7027	30.894	31.3283	31.0965	31.0943	30.8692	31.2311	31.1238	31.0074	30.7514	31.8491	30.6299	31.463	31.3095	30.4727	30.7541	30.5416	30.9779	31.0162	30.6983	31.0129	30.6895	30.6493
O00232;J3KTJ5;J3KSK1	O00232	26S proteasome non-ATPase regulatory subunit 12	PSMD12	PSMD12	30.1009	30.3005	29.8504	30.0898	30.5037	30.3698	30.3118	29.9859	29.9845	30.303	30.4771	29.9913	29.7972	30.4488	30.4438	30.3243	30.1553	30.054	29.7756	30.2787	30.5993	30.279	29.8393	30.2309	30.6526	30.3824	30.2094	30.2215	30.2726	30.3743	30.2398	30.2497	30.3206	29.7842	30.1179	30.2843	30.1541	30.2538	29.8771	30.3042	30.2265	29.4641	29.8456	29.6505	29.5761
O00233;J3KN29;F5H5V4;F5GX23;O00233-2;F5H7X1;O00233-3;F5H169	O00233;J3KN29;F5H5V4;F5GX23;O00233-2;F5H7X1;O00233-3	26S proteasome non-ATPase regulatory subunit 9	PSMD9	PSMD9	26.9903	27.7133	27.5359	28.3456	27.238	27.3921	27.8102	27.7297	27.6408	28.1001	26.8694	27.693	27.6053	27.9036	28.0415	27.646	26.8327	26.8649	28.0435	27.8403	27.2867	27.2602	27.6401	27.2841	26.8455	26.6808	27.1358	27.1351	27.1981	27.4227	28.5894	27.5803	26.9249	27.8797	27.2558	27.1567	27.2449	27.0855	28.8401	26.7608	25.2817	27.5315	27.4607	28.8154	29.6107
O00264;O00264-2	O00264;O00264-2	Membrane-associated progesterone receptor component 1	PGRMC1	PGRMC1	26.1842	26.872	26.14	26.3013	24.7555	26.5932	26.7103	23.2643	26.3764	27.536	26.857	25.8752	27.1303	27.4529	26.6057	27.4031	25.6443	25.8622	24.9441	25.7084	27.058	25.8591	27.1604	27.7872	27.5017	26.2629	27.8398	27.7079	27.3363	23.3517	26.2881	27.2413	27.4483	27.8321	25.9528	27.8394	27.5702	27.4413	27.8888	23.5727	27.4943	23.1243	24.751	24.855	26.1187
O00273;O00273-2;K7ERT1	O00273;O00273-2	DNA fragmentation factor subunit alpha	DFFA	DFFA	24.7863	23.9174	24.602	23.2717	23.6947	22.6003	24.6814	23.9886	25.0852	24.1131	24.7324	24.4557	25.1671	25.2674	26.5656	24.3886	25.4274	24.0485	23.2023	25.6052	26.2565	26.6092	24.651	25.8877	24.8012	23.2054	24.9389	22.8873	24.5075	23.9173	22.0568	24.1591	22.358	23.9447	26.4328	24.148	26.389	25.9131	23.9405	24.1616	23.5064	23.2604	26.0381	24.6544	24.2421
O00291-3;O00291	O00291-3;O00291	Huntingtin-interacting protein 1	HIP1	HIP1	25.0969	25.9044	26.0575	26.7866	22.6776	26.3914	25.532	26.0703	25.5233	26.1525	26.0023	24.7053	27.5517	25.944	26.2194	25.2065	26.2681	25.3844	26.358	27.2608	26.5319	26.4075	26.9015	24.9939	26.7282	24.3233	23.9026	25.3143	28.4121	26.3859	26.0038	26.4691	27.6246	25.5266	26.112	25.161	23.3152	27.8513	27.0701	27.83	27.4111	22.7468	24.8895	23.3417	25.595
O00299	O00299	Chloride intracellular channel protein 1	CLIC1	CLIC1	30.4693	30.9535	30.9394	31.0739	30.6076	31.0709	30.4116	30.6319	30.4129	29.7922	29.9779	29.866	30.3328	31.6769	30.7254	30.9356	30.1182	29.7339	29.8622	30.4875	30.8901	29.911	30.0052	30.6407	30.6601	30.3399	30.3843	29.9345	30.7869	30.3107	29.7213	30.1654	31.1487	30.6746	30.681	30.4102	30.0682	29.982	30.7928	30.4123	30.1414	30.5133	30.6815	30.5292	30.5849
O00303;H0YDT6;E9PQV8;A0A1W2PP79	O00303	Eukaryotic translation initiation factor 3 subunit F	EIF3F	EIF3F	29.099	29.415	28.8335	30.0397	29.8597	29.932	29.7868	29.8463	29.8792	30.2958	30.4227	29.6091	29.4113	31.0833	30.4805	30.8272	29.9762	30.0449	29.9606	30.3322	30.0641	29.9864	30.349	30.3354	29.6596	30.4575	29.7519	29.9568	29.8097	29.7499	29.6981	29.8102	30.9228	29.5058	30.151	30.0698	30.5128	29.6428	29.4383	27.6307	29.7163	30.1056	29.9799	29.5548	29.3333
O00330-3;O00330;E9PRI6;O00330-2;H0YD97	O00330-3;O00330	Pyruvate dehydrogenase protein X component, mitochondrial	PDHX	PDHX	33.7854	33.8991	33.6186	33.4908	33.4474	33.2324	33.5253	33.4667	33.5397	33.6177	33.2514	33.6804	33.8447	32.9756	33.4745	33.156	33.0956	33.4968	33.1824	33.3761	33.7447	33.348	32.9602	33.2941	33.2886	33.1294	33.5778	33.3251	33.6966	33.5422	33.5497	33.6204	33.2082	33.1146	33.5056	33.4092	32.837	33.6032	32.7719	33.3151	33.8999	33.5778	33.6894	33.3646	33.247
O00339-2;H0YBJ4;H0YBU5	O00339-2;H0YBJ4	Matrilin-2	MATN2	MATN2	27.9717	28.959	27.4818	29.1762	28.4526	28.2607	27.7761	23.4018	26.1093	26.6477	28.3518	23.8291	28.144	24.7379	24.1565	24.1965	25.5124	23.6501	27.3738	25.3592	27.493	26.7249	24.7134	25.9169	29.3271	29.7449	28.4802	29.6111	29.9254	23.4601	27.1171	29.6704	31.3146	28.1271	28.6776	28.801	25.8964	22.149	29.6966	29.746	28.0678	26.286	25.7445	28.4922	27.7179
O00391;O00391-2;A8MXT8;H0Y5Z8	O00391;O00391-2	Sulfhydryl oxidase 1	QSOX1	QSOX1	26.25	26.0233	23.5655	26.77	25.8519	25.801	24.2313	24.1324	25.0209	24.1918	26.3956	23.9896	23.2713	26.0838	26.2857	27.384	28.6335	23.2314	22.8828	27.4055	26.6248	25.7981	26.0122	23.0633	26.0759	27.6764	27.1822	26.7519	26.0905	23.2415	23.6747	22.5322	29.6349	26.405	26.7062	28.0876	23.9251	24.3962	27.4967	26.4404	24.574	24.0526	24.0196	26.7466	23.5961
O00399;E5RK00;E5RFU3;E5RIK5;E5RGW9	O00399;E5RK00	Dynactin subunit 6	DCTN6	DCTN6	25.2806	23.3624	24.8175	23.9992	26.7986	27.1785	23.799	24.2562	26.293	26.5352	25.1823	25.6717	26.0138	25.1071	26.0795	25.4003	25.792	25.9322	26.6203	26.31	25.2394	26.8837	23.6194	26.3301	25.6978	25.991	25.1423	23.0652	23.3226	24.3326	26.3858	24.0647	24.2194	25.1164	24.8168	23.5052	24.9331	26.9932	26.4418	24.7815	22.5522	24.5857	25.5151	24.9419	24.2699
O00410;H0Y8C6;O00410-2;E7ETV3;E7EQT5;C9JMV5;C9JZD8;E7ETV8;C9JZ53	O00410;H0Y8C6;O00410-2	Importin-5	IPO5	IPO5	32.3647	32.6238	32.3515	32.5749	32.8126	32.6438	32.6881	32.2724	32.4077	32.03	32.7525	32.2384	32.2373	33.502	33.0776	32.9653	32.4443	32.2591	31.8838	32.8583	32.4518	32.4188	32.2423	32.9206	32.5216	32.6826	32.2086	32.4952	32.4358	32.6463	32.3854	32.5713	32.0221	32.5645	32.3587	32.6916	32.8557	32.1518	32.9223	32.6646	32.294	31.7709	31.981	31.1835	32.1812
O00429;O00429-3;O00429-5;O00429-7;F8VZ52;B4DDQ3;B4DPZ9;F8W1W3;F8VR28;H0YHY4	O00429;O00429-3;O00429-5;O00429-7	Dynamin-1-like protein	DNM1L	DNM1L	32.4612	32.705	32.3751	32.3642	32.6712	32.4692	32.5194	32.5026	32.5302	32.5867	32.4991	32.6158	32.2969	32.4697	32.6721	32.0173	32.5876	32.4731	32.5764	32.4921	32.6675	32.6487	32.7465	32.4959	32.2934	32.6149	32.3605	32.3272	32.455	32.77	32.8867	33.0625	32.0955	32.5065	32.3976	32.7353	32.9461	32.4855	32.0735	32.5173	32.3853	32.4437	32.7684	32.3563	32.1893
O00429-2;O00429-4	O00429-2;O00429-4	Dynamin-1-like protein	DNM1L	DNM1L.1	27.4964	27.1661	23.9791	26.6827	24.8398	24.2843	27.4285	26.2555	24.631	23.485	24.283	25.754	24.961	23.8648	25.3842	23.909	26.4897	22.0251	24.091	24.2218	26.9617	26.9038	25.1921	26.0024	27.1704	26.666	24.3649	22.3652	24.537	23.4418	27.2125	22.0324	22.8692	24.4993	26.6259	23.3454	24.0651	23.5849	22.4736	23.7372	26.5475	27.2449	25.2425	26.7265	27.3141
O00442;O00442-2;A6NIC1	O00442;O00442-2	RNA 3-terminal phosphate cyclase	RTCA	RTCA	28.373	28.6563	28.7672	29.0133	29.2945	29.1883	29.143	29.1261	29.4104	28.816	28.8294	29.0872	29.2298	29.9168	29.5402	28.7822	29.6127	29.3846	29.0774	29.02	29.4411	29.3335	29.0108	29.1844	28.45	29.0937	28.804	28.8612	28.8904	29.485	29.3661	29.3905	27.2625	28.6729	29.0878	28.9349	29.1924	29.1547	28.7202	29.0035	29.2512	27.2122	28.4421	26.8497	28.4065
O00443;A0A0C4DGF9;O00443-2;E9PPP3	O00443	Phosphatidylinositol 4-phosphate 3-kinase C2 domain-containing subunit alpha	PIK3C2A	PIK3C2A	23.5656	26.7809	25.3556	27.0245	23.0227	22.8584	25.8971	26.9949	27.5034	25.3516	26.6264	26.0092	27.1694	22.4051	26.8191	22.7926	24.7322	25.4352	23.9222	23.4296	25.0775	24.7481	22.6885	23.6872	24.9237	26.1018	27.4244	26.2227	25.6743	26.4494	24.6649	27.8208	25.4137	24.5892	24.5305	26.9458	23.8019	28.3999	25.8857	26.7436	26.2325	27.7499	27.2353	25.0483	24.0536
O00461;F8W785	O00461;F8W785	Golgi integral membrane protein 4	GOLIM4	GOLIM4	27.2868	26.4832	26.9552	26.807	27.3242	27.0124	26.5341	25.0282	25.3055	23.6847	26.8433	26.5173	26.2089	26.5872	26.4001	26.2753	25.6662	26.4711	23.8617	26.2562	26.5871	26.6553	26.5319	27.1113	26.7268	26.0852	26.8171	26.7406	27.3157	26.7838	26.0097	27.1227	27.5411	26.6832	27.5555	26.9401	25.8789	26.0812	27.0269	26.7528	26.6309	26.1378	26.7519	26.5805	26.3988
O00468-6;O00468-3;O00468-7;O00468-5;O00468-4;O00468;A0A087X208;O00468-2;H0Y5U1	O00468-6;O00468-3;O00468-7;O00468-5;O00468-4;O00468;A0A087X208;O00468-2	Agrin;Agrin N-terminal 110 kDa subunit;Agrin C-terminal 110 kDa subunit;Agrin C-terminal 90 kDa fragment;Agrin C-terminal 22 kDa fragment	AGRN	AGRN	30.7604	30.6331	30.6839	30.6718	30.292	31.3871	30.695	31.1117	29.9591	30.4352	30.6396	29.8388	30.1828	30.2779	29.4338	29.5069	30.7954	30.3912	30.2425	30.397	30.5909	30.2909	30.2349	29.9314	30.2884	30.532	30.5135	30.3634	30.74	30.7935	30.7223	30.6071	31.0677	30.6539	30.7627	30.6154	30.1473	30.0941	30.1314	30.5903	30.5627	30.4907	30.7267	30.1131	29.8696
O00471;A0A0A0MSI8;F8W9B8;G3V377;G3V4Z7	O00471;A0A0A0MSI8;F8W9B8	Exocyst complex component 5	EXOC5	EXOC5	25.8556	25.4821	27.3975	25.5577	26.5673	25.91	26.7196	27.4744	26.1972	27.9614	27.0806	25.8216	28.4704	26.2876	26.454	26.1856	27.3576	26.947	26.9378	26.8207	28.1797	27.4706	28.008	27.5916	27.3384	28.3937	28.2114	27.6193	28.5339	25.6366	27.8169	27.9261	27.2162	27.612	27.6116	28.6888	27.4253	27.0408	27.8063	29.8902	27.1098	27.6811	27.0086	26.097	26.8353
O00478-2;O00478;C9JZT5;C9JUV8;C9JQT8;C9JNZ3;E9PRX1;C9JVU4;C9J3Q8;C9J877;E9PJE9;E9PFB8;E7EPR2	O00478-2;O00478;C9JZT5;C9JUV8	Butyrophilin subfamily 3 member A3	BTN3A3	BTN3A3	25.5857	24.3715	24.8792	23.8072	24.5098	21.68	23.4025	25.4948	24.1012	26.0759	27.2277	24.1793	23.7181	24.2484	22.7192	23.4548	26.6178	23.8426	23.1499	24.2119	24.023	25.7906	23.3134	24.4969	24.187	25.4555	24.4811	25.2574	23.7058	24.1103	25.0512	25.3644	26.2697	25.913	27.1295	26.8785	25.2766	24.9872	26.0971	25.4261	23.8805	24.0999	23.9906	23.9996	23.3824
O00479	O00479	High mobility group nucleosome-binding domain-containing protein 4	HMGN4	HMGN4	24.1892	23.2059	25.0183	24.3171	24.1851	24.6601	23.8373	20.584	24.3627	25.0631	23.1017	25.6006	22.5949	22.1535	24.5969	23.2153	24.8921	25.7933	25.4049	24.6284	23.7724	25.3154	24.7439	25.0408	23.6959	23.9589	24.6194	24.6239	22.4497	23.5816	24.7194	24.5856	25.6139	25.8459	24.9411	24.2181	23.8642	25.8681	25.9341	26.7622	20.1535	24.0897	25.0646	25.8499	25.068
O00483	O00483	Cytochrome c oxidase subunit NDUFA4	NDUFA4	NDUFA4	33.7933	33.6521	33.9621	33.2614	33.0377	32.8279	33.2842	33.5103	33.5208	33.3854	33.4787	33.1221	34.5292	33.2796	33.3515	33.091	33.3012	33.8791	33.9509	33.5549	33.8041	33.5598	33.5328	33.4961	33.7817	32.717	34.0207	33.1728	33.3555	33.4781	33.6044	33.1813	33.1007	32.978	32.3456	33.2637	33.632	34.2707	33.6098	34.0287	33.678	33.3474	33.6639	34.1644	33.626
O00487;C9JW37	O00487	26S proteasome non-ATPase regulatory subunit 14	PSMD14	PSMD14	28.906	28.258	28.3318	29.7219	29.4781	29.3556	29.6933	29.2568	29.8025	29.8529	29.8643	29.4832	29.6003	29.9971	29.5787	29.9324	29.3246	29.6529	29.5403	29.5994	30.1941	29.7473	29.7879	29.4196	29.7455	30.6102	29.6682	30.0695	28.6775	29.5824	29.7318	28.7708	29.6445	29.0207	28.6067	29.4507	31.32	29.2699	29.3057	28.8832	29.6411	28.2999	28.0844	27.9885	27.097
O00499-9;O00499-7;O00499-4;O00499-6;O00499-3;O00499-2;O00499-5;O00499;O00499-10;O00499-8;O00499-11;S4R418	O00499-9;O00499-7;O00499-4;O00499-6;O00499-3;O00499-2;O00499-5;O00499;O00499-10;O00499-8;O00499-11	Myc box-dependent-interacting protein 1	BIN1	BIN1	26.7774	26.4535	26.3457	26.4791	26.9757	24.03	26.0809	26.9487	25.3794	25.6136	25.2099	22.9306	25.572	23.7872	23.9119	25.0997	23.7039	27.1673	26.136	24.2639	24.7021	24.747	26.4055	23.9175	27.2529	27.7759	23.3214	27.199	26.1742	24.2522	23.0503	25.9091	27.6788	23.5844	27.8526	27.8207	22.5256	23.2122	26.2401	26.6009	26.6633	25.046	26.4363	22.886	26.5237
O00505;H0Y4S9	O00505	Importin subunit alpha-4	KPNA3	KPNA3	27.5304	27.6736	28.1164	26.8635	27.6054	27.5347	27.8572	27.7015	27.3209	26.6958	27.0737	27.6937	27.3418	28.3119	28.0203	28.0933	27.867	27.8714	27.5561	28.2486	26.3675	28.3868	28.0648	27.9836	24.687	26.9071	25.4978	27.824	27.3566	27.6728	27.5037	26.7401	26.938	27.8752	27.9702	28.3387	26.5231	27.0556	27.2122	27.7727	25.725	27.6672	28.3128	27.5216	27.7852
O00560;O00560-3;B4DHN5;E9PBU7	O00560;O00560-3;B4DHN5;E9PBU7	Syntenin-1	SDCBP	SDCBP	28.8409	29.0242	29.5526	27.6838	29.1187	29.1455	28.9152	29.343	29.4193	29.9806	29.1271	29.7382	29.7373	29.5871	29.6331	30.0176	30.9927	29.8369	30.1125	29.6181	30.7618	30.3161	30.3162	29.4564	29.5282	30.1575	29.7142	29.5862	29.4551	29.7706	30.4081	29.9341	30.1471	30.0724	29.6719	30.0647	29.341	30.0396	28.9489	29.3657	29.5415	29.064	29.303	27.1962	28.2712
O00560-2;G5EA09	O00560-2;G5EA09	Syntenin-1	SDCBP	SDCBP.1	25.3883	25.5483	26.2919	25.4489	25.6013	25.6782	25.9175	26.3028	25.7177	26.7849	25.266	26.6772	26.6722	26.6014	26.2863	26.5747	26.6449	26.4938	26.6636	26.1263	27.5116	26.4009	27.3427	26.1071	25.436	26.0479	26.4289	25.3117	25.3784	25.7685	26.9866	25.84	26.2004	26.0809	25.9592	26.978	24.7409	26.398	26.3534	24.2558	26.0811	23.6798	23.0313	24.0272	25.5643
O00567;H0YDU4;H0Y653;Q5JXT2	O00567	Nucleolar protein 56	NOP56	NOP56	27.6924	27.1124	27.2142	26.432	26.1266	27.5155	27.2187	28.2903	24.5632	25.6619	26.4818	26.7081	26.5978	28.6483	28.3089	30.3445	27.9588	27.1668	26.3647	26.35	26.4246	27.5204	25.4408	27.5029	26.4847	28.1167	27.1999	26.5429	27.8842	26.9187	26.5456	27.436	27.8436	27.754	29.8505	27.2667	24.4399	27.0581	26.1221	26.8531	25.8147	23.4318	23.1357	25.5084	26.215
O00592-2;O00592	O00592-2;O00592	Podocalyxin	PODXL	PODXL	26.8643	28.0896	25.9191	27.3742	23.6051	28.0876	26.386	27.6217	28.1981	28.026	26.6274	27.6707	27.504	27.7712	25.9064	27.9659	27.1813	27.7554	28.1941	27.5482	26.8987	27.7807	26.6857	28.0286	26.7401	27.6433	27.4635	27.1752	25.0035	28.8279	28.1813	28.2063	26.3866	28.073	26.1056	27.022	26.9304	27.6204	26.4453	27.9031	26.7121	26.6465	27.1827	28.5466	27.7372
O00625	O00625	Pirin	PIR	PIR	26.2208	25.6615	26.2034	25.8241	25.9303	26.321	26.0182	26.5221	26.4095	26.7586	26.4131	25.8445	23.0732	27.4347	26.0705	26.2166	26.633	26.4752	26.1071	26.3543	26.3134	26.4458	26.6663	26.7615	26.1781	26.6982	26.0219	26.9642	25.9662	26.6043	26.177	26.1704	25.2294	26.4956	25.3217	26.8257	28.4587	24.4026	23.6947	26.4314	26.1407	24.3213	23.7539	24.4553	25.9308
O00629;H7C4F6	O00629	Importin subunit alpha-3	KPNA4	KPNA4	29.915	30.0841	30.6417	30.5149	30.8782	30.7429	30.7163	29.7405	30.0889	30.1791	30.4105	30.0917	30.2671	30.9638	30.5771	30.108	30.4953	30.0953	29.8423	30.4772	29.9743	30.0781	30.5524	30.6927	30.4566	30.1724	30.5868	30.3936	30.154	30.1855	30.4323	30.228	29.7906	30.1504	30.403	30.5799	31.2663	30.4683	30.1599	30.3343	30.3251	29.4412	30.5489	30.1257	30.3554
O00743;O00743-3;O00743-2;Q5T1S7	O00743;O00743-3;O00743-2	Serine/threonine-protein phosphatase 6 catalytic subunit;Serine/threonine-protein phosphatase 6 catalytic subunit, N-terminally processed	PPP6C	PPP6C	24.8455	27.3388	26.3915	23.6938	25.8418	25.9925	25.7087	25.8141	26.1144	22.1378	25.1888	24.8594	22.4904	25.1444	25.6532	26.5384	25.5752	25.4301	26.9117	27.0238	26.2161	25.6523	23.8417	25.5618	23.9754	26.0483	23.8619	25.6694	25.532	26.415	24.1065	25.6743	26.0378	24.9447	26.5223	22.8997	25.5746	23.1286	22.3713	22.7826	23.7007	25.7462	26.139	24.4077	26.4441
O00748;O00748-4;O00748-2;O00748-5;J3QSC0;J3QLP1;A0A0C4DGH1;A0A3B3ITR8;Q5XG92-4;Q5XG92-6;Q5XG92-2;Q5XG92	O00748;O00748-4;O00748-2;O00748-5;J3QSC0	Cocaine esterase	CES2	CES2	32.0134	31.9287	31.3129	30.075	30.3964	30.9207	31.7317	30.8338	31.7878	31.5894	30.9618	31.364	31.3549	31.29	30.8569	30.5733	30.5772	31.583	30.9819	31.2064	29.8099	31.0855	31.5759	31.082	31.5244	30.7244	30.6251	30.8997	30.4551	30.6454	31.6875	31.1701	29.9498	30.7541	30.0235	30.6239	30.149	30.7808	28.2579	30.1934	31.8177	31.2261	31.1059	30.1477	31.3043
O00763;O00763-3;O00763-2;F8W8T8;H0YGH5;A0A087WUA1;S4R3S7;A0A087X0W4;F5H5C3;A0A087WVR6	O00763;O00763-3;O00763-2	Acetyl-CoA carboxylase 2;Biotin carboxylase	ACACB	ACACB	28.6642	27.8526	25.8129	27.56	27.9398	27.2109	27.4266	27.311	26.9218	28.5681	26.3889	28.6697	28.4356	27.7552	28.6391	27.2147	27.8508	27.7724	27.6656	27.068	28.8455	27.3265	28.1672	27.9303	27.1109	27.8106	27.4201	27.6286	27.2002	27.4309	27.773	27.1221	27.9533	27.0648	27.4096	28.0676	27.1287	28.6702	27.7476	27.1125	27.048	26.6849	26.6443	27.3746	27.0355
O00764;F2Z2Y4;O00764-3;O00764-2;A8MV33	O00764;F2Z2Y4;O00764-3;O00764-2	Pyridoxal kinase	PDXK	PDXK	30.8219	31.019	31.2775	30.7109	30.5337	30.3271	30.8106	31.2452	31.0484	31.158	30.9993	30.5175	31.2102	31.2782	31.1913	30.4265	31.1804	31.2008	31.6126	30.9869	30.9913	31.3928	31.4774	31.038	30.7193	31.2309	31.5515	30.5856	30.7661	30.7066	31.1604	30.6448	29.4526	31.0765	29.9695	31.0496	31.2053	31.2357	30.7274	31.0959	31.2179	30.4864	30.2639	29.3025	30.6309
O14495;A0A286YF41;A0A286YEZ7;A0A286YES4	O14495	Lipid phosphate phosphohydrolase 3	PLPP3	PLPP3	26.0338	27.1435	25.5102	24.5262	24.3215	26.1046	26.2256	25.2334	26.0852	25.8131	26.0005	25.4488	26.2588	25.0715	26.1937	26.0895	26.7299	24.425	24.7486	24.7287	24.7633	25.104	24.6975	26.3846	24.3804	25.9946	25.862	26.8736	25.3346	25.5919	25.0927	26.2291	27.1865	25.4961	27.4092	24.6228	25.3398	26.0268	25.9837	25.2443	24.629	26.8297	26.2756	24.3914	22.8871
O14498;H0YN67;H0YL90	O14498;H0YN67;H0YL90	Immunoglobulin superfamily containing leucine-rich repeat protein	ISLR	ISLR	25.6869	28.169	24.0995	28.8645	26.5185	28.7128	24.2031	23.4024	23.6882	24.0017	24.2058	23.444	30.3315	24.1008	22.0081	22.632	24.7367	26.335	30.0733	23.6572	21.2952	23.8082	24.0178	24.6851	23.5406	29.3955	26.6913	28.9365	25.6923	23.7963	25.7436	25.4029	30.0587	23.91	28.3878	24.6624	29.1899	29.928	28.5403	24.56	32.7247	28.7154	29.8832	27.9751	27.7705
O14521;H0YD41;G3V173;E9PK73;H3BRW5;O14521-2;O14521-4;H0YD96;A0A1W2PNY0;O14521-3	O14521;H0YD41;G3V173;E9PK73;H3BRW5;O14521-2;O14521-4	Succinate dehydrogenase [ubiquinone] cytochrome b small subunit, mitochondrial	SDHD	SDHD	29.7478	29.5944	29.5909	29.5802	29.5294	29.3367	30.7207	29.734	29.6504	29.392	29.198	29.2476	29.8859	29.0595	28.7825	29.1797	27.9369	29.2943	28.7926	29.2853	28.6588	29.0389	30.0479	29.3539	29.652	30.0423	28.5921	29.4966	28.8039	29.9638	29.5769	28.635	29.7594	29.3787	28.6432	28.4636	28.2735	29.7667	29.4977	29.5904	29.9923	28.2124	28.4858	30.9854	29.7362
O14531;Q5T0Q6	O14531;Q5T0Q6	Dihydropyrimidinase-related protein 4	DPYSL4	DPYSL4	26.6642	25.7244	27.4497	26.5674	26.7685	26.1465	27.0171	27.3061	27.4977	23.6501	22.8075	27.6987	26.6209	23.7484	27.6244	24.796	29.2816	26.5701	27.8283	26.1671	27.4372	27.721	27.1452	26.6092	25.2033	26.3065	26.3165	24.8906	27.6917	27.2424	27.3299	26.5027	27.3616	26.467	26.7445	25.4073	27.3198	27.0667	26.6621	26.392	26.6252	23.7978	26.2659	23.2953	27.4055
O14548;E5RJZ1;H0YBD2;E5RFH8	O14548;E5RJZ1;H0YBD2	Cytochrome c oxidase subunit 7A-related protein, mitochondrial	COX7A2L	COX7A2L	30.0674	30.9119	31.1706	30.0398	30.9946	30.6237	30.6787	30.5331	30.547	30.8889	30.5869	30.0197	31.3248	30.5806	30.9385	30.4154	30.7259	30.4353	30.958	30.8828	31.6752	30.3709	29.9373	31.4945	30.9021	30.7066	31.043	31.2326	31.7813	30.6397	31.3476	31.375	30.7943	31.734	30.3532	30.7203	29.6434	31.4425	29.2142	30.7193	30.974	30.9925	30.638	30.43	30.5531
O14558;A0A1X7SC65;K7EP04	O14558;A0A1X7SC65;K7EP04	Heat shock protein beta-6	HSPB6	HSPB6	35.4171	35.2251	34.7248	34.712	34.7674	35.2826	35.1059	33.2997	34.548	34.3881	33.8792	35.849	34.2653	34.1092	34.8628	33.4529	33.9754	34.2781	33.7635	34.4018	33.6843	33.9975	34.2057	34.3582	34.7262	34.8999	34.7306	35.3668	34.915	34.7129	34.6395	35.0197	34.6429	33.7288	35.7203	34.6326	34.9102	35.1295	33.9293	32.4588	35.0746	34.4895	35.132	33.3598	35.5504
O14561;H3BNK3	O14561;H3BNK3	Acyl carrier protein, mitochondrial;Acyl carrier protein	NDUFAB1	NDUFAB1	29.4361	29.4741	29.524	29.1032	29.0115	29.562	29.3079	27.4882	29.4446	29.1053	29.7375	28.8271	29.7137	28.7073	30.1499	28.8816	31.1812	29.8461	29.1677	30.3717	31.9599	31.6818	31.2148	29.8504	29.3679	29.8819	29.6659	30.2469	28.2359	29.7248	29.8421	28.9757	28.13	29.8232	29.4926	30.7203	30.7949	30.5568	29.9051	23.8673	30.6003	30.3519	29.978	29.3295	29.6182
O14576-2;O14576-3;O14576;O14576-4;O14576-5;A0A0A0MTG2;C9J3E7;E5RJ75;E5RFE1	O14576-2;O14576-3;O14576;O14576-4;O14576-5;A0A0A0MTG2	Cytoplasmic dynein 1 intermediate chain 1	DYNC1I1	DYNC1I1	27.9111	27.3513	24.5188	26.3943	26.5963	25.4481	26.5663	25.9149	25.9783	26.1489	25.5565	26.6009	25.8843	25.2489	26.5785	25.9166	27.4788	26.9263	27.0362	25.1944	25.7035	26.6273	26.1351	26.0804	25.9553	25.8182	25.6458	26.0597	26.8121	26.8585	25.9382	25.3744	25.873	25.3372	25.4271	26.9838	25.675	25.9498	26.0332	26.0349	26.7894	26.9185	27.3824	28.1829	22.752
O14579;M0QXB4;O14579-2;O14579-3;M0R061	O14579;M0QXB4;O14579-2;O14579-3	Coatomer subunit epsilon	COPE	COPE	29.694	29.1396	28.7813	29.1764	29.5866	29.2612	29.2781	29.2742	29.1663	29.0811	29.3312	28.8452	28.7713	29.8787	29.3722	29.8744	29.3675	28.8693	28.9355	29.2169	29.3706	29.224	28.8092	29.1989	28.4644	29.1537	29.47	28.814	28.9572	29.7674	28.7473	29.2789	29.5149	29.2648	29.6199	28.8804	28.3135	28.9614	29.5136	27.2549	28.8698	29.2735	30.0831	29.4021	28.4432
O14617-5;O14617;O14617-2;O14617-4;A0A2R8Y611;O14617-3;A0A2R8Y4J3;A0A087WYN6;K7ELX8;K7ERW8	O14617-5;O14617;O14617-2;O14617-4;A0A2R8Y611;O14617-3	AP-3 complex subunit delta-1	AP3D1	AP3D1	26.8121	26.3827	25.0357	26.1751	26.4116	26.6391	26.6214	23.6036	24.2097	25.8542	25.0076	25.9085	26.9738	26.8853	25.6384	27.7561	26.6133	26.1691	26.7212	26.225	26.5258	26.2376	26.1289	25.874	27.459	26.849	23.68	26.4804	26.3819	26.6087	25.9636	26.2731	26.1174	25.4661	26.1253	27.2627	25.9496	26.3958	26.915	26.0493	27.0256	26.421	22.079	26.3136	27.0539
O14639-5;O14639-3;O14639-4;J3QSX6;H0Y7N6;F6XFR5	O14639-5;O14639-3;O14639-4;J3QSX6	#N/A	ABLIM1	ABLIM1	22.9302	26.9873	23.6678	24.892	25.8858	24.1842	25.7164	24.5367	23.3204	26.1471	23.0305	25.5743	25.3759	24.5744	25.4534	22.8809	24.1094	26.298	26.823	26.0572	23.1239	24.25	25.3793	26.3708	23.2553	24.9804	25.4921	25.3635	22.3309	27.183	27.1365	25.9417	25.2659	25.7277	23.875	27.5563	24.1018	25.8348	23.8171	25.8702	26.5858	24.36	24.5292	24.1068	24.3015
O14639-6	O14639-6	#N/A	ABLIM1	ABLIM1.1	33.6309	33.5619	33.8174	33.5391	33.4994	33.4089	33.4204	33.692	33.1373	33.3035	32.7399	33.1392	33.3679	33.1187	33.6101	33.0247	33.6681	33.6657	33.6169	33.3408	32.6236	33.5005	33.335	33.2442	33.7418	33.0175	33.6153	33.6088	33.6873	33.6561	33.5995	33.5247	32.8221	33.9487	33.6364	33.5772	33.3619	33.9011	32.6523	33.8046	33.8765	33.7615	33.6527	33.5489	33.4353
O14662-2	O14662-2	Syntaxin-16	STX16	STX16	23.2842	24.3137	24.9087	23.1099	23.2303	21.3108	24.7559	22.9793	24.0199	24.3046	23.1865	23.913	23.2142	24.9621	23.5627	25.2165	23.8152	23.1321	23.5011	24.7476	22.7835	22.6208	23.8708	22.9988	24.8469	25.7705	25.8907	26.1728	25.5051	22.9206	23.5021	23.7152	23.7086	23.5176	22.9989	24.7863	24.9054	25.6904	24.42	25.9474	25.7402	23.5491	25.3739	23.7516	22.8113
O14672;O14672-2;H3BS53;H0YK87;C9J9B4;H0YNC5	O14672;O14672-2	Disintegrin and metalloproteinase domain-containing protein 10	ADAM10	ADAM10	25.0038	24.9504	25.637	23.9288	23.9721	24.4955	24.3418	24.7795	24.1209	25.1367	22.9292	23.7086	23.5546	23.1599	24.3097	26.1239	24.7088	25.1027	25.3629	24.5622	24.6114	22.7452	25.0676	23.6831	24.5063	24.8743	25.1303	23.7373	25.5458	24.0752	24.3845	24.2565	25.4192	24.9342	24.6948	23.967	23.0616	25.3721	23.4452	23.1962	23.1818	24.8676	25.4804	25.2411	23.6745
O14732-2;O14732;K7EL65;K7ELF8;Q6PIP6;K7EII9	O14732-2;O14732	Inositol monophosphatase 2	IMPA2	IMPA2	23.8544	26.3927	22.9504	24.8162	28.953	23.8989	28.179	27.8078	27.0118	26.7214	25.1815	26.9059	26.3767	27.0847	23.1257	25.7168	26.7677	25.0588	26.186	26.9364	23.787	27.0881	27.0741	24.2477	26.8965	27.0125	27.8353	26.9191	22.6332	27.9346	24.5275	28.0329	26.3466	26.1964	26.2204	26.988	24.3016	23.4939	24.7051	23.6978	23.2302	28.6586	29.2921	30.1363	29.4865
O14734;E9PJN0;E9PRD4;H7C5A7;E9PMC4;E9PIS4;Q9BR14;F6VBM3;H0Y698	O14734;E9PJN0;E9PRD4;H7C5A7	Acyl-coenzyme A thioesterase 8	ACOT8	ACOT8	24.0381	25.8896	23.4203	24.0222	25.8312	25.9131	25.3451	25.3598	25.9342	25.9526	25.0038	25.2299	25.4476	23.8531	27.2628	24.2459	25.2701	24.6116	23.8408	25.4122	26.2172	22.5039	25.5844	25.8883	23.4945	24.1577	24.4404	22.6722	24.8661	25.6737	23.7884	26.0405	23.3342	22.7642	23.8981	24.4044	23.6657	24.1753	24.9228	25.5744	24.3818	22.3636	23.2657	22.118	25.5495
O14735;B3KY94;O14735-3;H3BUR9;O14735-2	O14735;B3KY94;O14735-3;H3BUR9	CDP-diacylglycerol--inositol 3-phosphatidyltransferase	CDIPT	CDIPT	28.9715	28.9722	29.2665	28.8434	28.646	28.9194	29.0968	28.5051	28.4479	28.2695	29.0406	28.0313	28.7417	28.0461	28.1174	28.8742	28.1151	28.1875	27.9408	27.8085	28.2662	27.6946	28.5266	28.6911	29.2618	28.3277	28.7288	28.8585	29.715	29.0071	28.3997	29.0038	29.3882	28.5569	29.2669	28.5034	27.9561	28.7275	28.3296	29.0852	28.5851	27.8697	28.4684	28.1432	28.1153
O14737;O14737-2;K7ESJ4;Q3HM38;X6R2P6	O14737;O14737-2	Programmed cell death protein 5	PDCD5	PDCD5	28.8255	29.766	28.0345	29.3191	28.276	28.6064	28.0948	28.8996	28.9031	28.3486	28.7157	29.3538	29.6759	30.0871	29.5154	29.1867	29.4285	29.2698	29.6484	29.5989	28.9004	29.3966	29.481	29.7988	29.1594	28.6566	29.5069	28.4951	29.3613	29.126	28.9874	29.0121	30.0725	29.3073	29.0767	28.6382	29.2346	29.5397	29.0564	25.6516	29.582	28.6628	28.9577	29.9279	29.0412
O14744;O14744-2;O14744-5;O14744-3;O14744-4;H0YJX6;G3V580;G3V5L5;G3V2X6;G3V2L6;H7BZ44;C9JSX3;H0YJ77;H0YJD3;G3V5T6;G3V507;H0YJY6;G3V2F5	O14744;O14744-2;O14744-5;O14744-3;O14744-4;H0YJX6	Protein arginine N-methyltransferase 5;Protein arginine N-methyltransferase 5, N-terminally processed	PRMT5	PRMT5	28.0844	29.6714	29.4327	29.8271	29.9532	29.3319	29.6336	28.7056	28.7629	29.1233	29.1829	28.908	28.7406	29.1385	28.2301	29.148	28.576	28.3763	28.8674	29.6494	29.2734	29.104	29.023	28.7046	28.6488	29.511	29.3818	29.8435	28.893	29.2448	29.4796	29.068	29.7565	28.7073	29.5262	29.3522	29.6585	29.0562	28.6147	28.9541	29.0766	28.4541	28.9495	29.758	29.4024
O14773;A0A2R8YGD1;A0A2R8YD45;O14773-2;A0A2R8Y7U1;A0A2R8Y7I4;A0A2R8YDY1;E7EV34;A0A2R8YD72;A0A2R8YE64	O14773;A0A2R8YGD1;A0A2R8YD45;O14773-2;A0A2R8Y7U1	Tripeptidyl-peptidase 1	TPP1	TPP1	32.5217	32.9777	33.2518	32.8925	33.0489	32.908	32.9951	32.4589	32.8439	33.4657	33.212	33.1591	33.6064	33.128	32.5285	32.9063	32.975	33.6796	33.6272	32.9358	33.2412	32.5126	32.8108	33.0044	33.0598	33.0985	32.8029	33.1826	33.2899	32.8506	32.6593	32.6829	31.3817	33.6355	32.7886	32.9275	32.5539	33.4996	31.784	31.7947	32.9033	32.1971	32.1349	32.0063	32.1224
O14786;E9PEP6;E7EX60;Q5T7F0;O14786-3;O14786-2;Q5JWQ6;Q5JWQ4;H0Y4A0;Q5JWQ2;V9GYL7	O14786;E9PEP6;E7EX60;Q5T7F0;O14786-3;O14786-2;Q5JWQ6;Q5JWQ4	Neuropilin-1	NRP1	NRP1	28.3485	28.485	27.8227	27.8938	28.6695	27.9775	28.7344	29.1956	28.5538	28.3471	27.9076	28.1441	28.0567	28.5403	27.3723	28.513	28.6026	28.2805	28.4612	28.2438	28.5153	27.8592	28.4178	27.9313	28.0402	28.5944	28.5828	28.6291	28.3504	29.3692	28.7185	27.4689	29.0742	28.4831	28.144	28.9908	28.5324	27.9133	28.3006	28.6549	28.2184	27.6937	28.3038	28.6981	27.2826
O14787-2;O14787;A0A075B780;K7ESC1;K7ENW1;K7EMA3	O14787-2;O14787;A0A075B780	Transportin-2	TNPO2	TNPO2	26.5797	26.9387	25.6027	26.6466	26.7206	27.1716	26.7218	25.6918	25.7552	24.2457	26.8405	26.2774	26.3359	27.0456	26.1587	26.9366	26.996	26.8756	26.1464	27.2583	26.0724	27.0732	26.5279	26.8242	26.0236	26.9259	26.0173	26.3641	25.0491	27.2127	27.0877	26.7341	23.835	27.1449	24.3346	26.4084	24.9656	25.9167	26.8932	27.0053	27.1422	22.8234	22.7427	23.8355	27.3043
O14791;O14791-3;O14791-2;B1AH96;B1AH94;B1AH95;F8WCH3;F8WB77	O14791;O14791-3;O14791-2;B1AH96	Apolipoprotein L1	APOL1	APOL1	27.8397	26.6688	22.4827	27.3649	26.6495	26.6672	24.4596	26.7175	25.5982	26.8078	26.1591	28.4631	28.9402	26.8846	25.0352	25.3595	23.1431	28.0429	26.6869	24.9422	23.6978	24.2495	29.1323	28.1728	26.1561	29.1755	27.4608	24.6113	27.4541	25.8992	26.2277	22.725	28.4352	28.2268	27.8034	28.2867	27.2829	26.0835	30.1032	26.0852	22.4708	27.0059	27.5407	27.9148	26.9558
O14807;C9J8Q6;O14807-2;C9J601	O14807;C9J8Q6;O14807-2	Ras-related protein M-Ras	MRAS	MRAS	27.2709	26.6516	26.7197	26.7479	27.0957	24.1554	27.3783	26.4434	27.3286	27.1184	27.1782	27.5494	27.6838	24.4136	27.1511	26.975	26.6632	26.9879	24.4334	27.7159	27.1987	27.5771	26.859	26.6988	27.4285	27.6576	27.1888	27.9122	26.7521	27.6947	28.1358	27.6712	28.3325	26.1941	28.4417	28.8157	27.0813	25.92	23.6317	25.2525	26.514	27.5787	26.8942	26.3075	26.1527
O14818;H0Y586;O14818-4;Q8TAA3-2;Q8TAA3-5;Q8TAA3;A0A087WYS6	O14818;H0Y586;O14818-4	Proteasome subunit alpha type-7	PSMA7	PSMA7	31.3651	30.9096	31.6591	31.2271	31.0262	31.3101	31.0766	31.3654	31.3125	31.5761	31.0944	31.0491	31.1057	31.654	31.6956	31.1257	31.3299	31.1358	31.4099	31.1177	31.8123	31.6014	31.3735	31.5522	31.9156	31.7211	31.5997	31.6248	31.5662	31.6077	31.8714	31.5449	32.0334	31.6343	31.757	31.9726	31.1759	31.4595	31.4832	31.4714	31.6373	31.544	31.1386	31.4145	30.8721
O14828;O14828-2	O14828;O14828-2	Secretory carrier-associated membrane protein 3	SCAMP3	SCAMP3	27.9258	28.4865	28.7882	28.3034	27.6352	28.3455	28.3675	28.2005	28.5394	28.1126	28.027	28.3837	27.9143	28.1841	28.9025	28.8788	28.7513	28.0669	28.4184	28.3767	28.3753	28.7026	28.3201	28.2848	28.5447	28.4007	28.4171	27.805	28.4799	28.785	28.8339	28.4682	29.0407	28.5266	28.4943	27.9683	26.5206	27.926	28.4399	28.496	28.2749	27.9399	27.8045	27.0987	27.7794
O14841;A0A087WY99	O14841	5-oxoprolinase	OPLAH	OPLAH	30.0943	30.4659	30.164	29.8118	29.8791	30.2801	29.8673	29.7874	29.7181	30.2366	29.9753	29.8125	29.775	29.9258	29.961	29.2683	30.1143	30.0474	30.2247	30.169	30.4408	30.3354	29.8115	29.6382	30.5425	30.2186	30.3454	30.1571	30.4211	29.8744	30.6574	30.2256	29.9773	30.4912	30.8293	30.5092	29.4394	30.2225	28.8189	30.5617	30.5443	30.3281	30.6516	29.8452	30.0428
O14867;C9IYH8;C9JMP6;C9IYR0	O14867	Transcription regulator protein BACH1	BACH1	BACH1	26.5828	25.4292	27.0906	25.7541	26.6057	26.2085	25.89	26.5919	24.3404	28.6141	25.8626	26.6026	27.2546	27.5216	25.4444	24.5023	28.8116	25.7368	27.7312	29.2454	22.7179	30.4644	26.3654	24.1763	26.6471	28.9188	28.8284	26.7339	24.6243	27.4981	28.9458	27.4898	24.1854	29.488	26.3617	27.7859	24.0335	26.1349	24.9736	24.4647	27.2451	25.2708	23.6242	22.8455	26.3358
O14874;O14874-3;O14874-2;H3BTL2;H3BS02;H3BNP3;H3BQP2;H3BUV3	O14874;O14874-3;O14874-2;H3BTL2;H3BS02	[3-methyl-2-oxobutanoate dehydrogenase [lipoamide]] kinase, mitochondrial	BCKDK	BCKDK	29.6579	29.6109	28.8358	29.7647	29.9875	29.3259	29.6518	29.6013	30.4435	30.7579	30.2825	29.9246	30.3396	29.2454	30.8121	29.7439	30.3033	29.8976	30.2511	30.1861	31.7895	30.5121	30.3667	30.342	29.9537	30.3267	30.31	30.6051	29.7406	30.6006	30.333	29.8943	29.0186	29.8108	29.7156	30.3459	30.6603	30.5236	29.5015	29.6865	30.1303	29.8691	29.8921	28.8881	29.0902
Q5VV89;O14880;Q5VV87	Q5VV89;O14880;Q5VV87	Microsomal glutathione S-transferase 3	MGST3	MGST3	33.4769	33.1995	32.6183	33.0815	33.1807	32.9905	33.6119	32.7349	33.2923	33.373	34.1697	34.0316	33.6288	32.5785	32.6875	33.1239	32.7874	33.6584	33.3588	33.0953	32.5564	32.3455	32.4301	32.956	32.2485	33.1039	32.2464	32.9747	31.184	33.2008	33.1301	32.8311	32.1775	33.0168	32.6434	33.2217	33.1297	32.768	31.7372	32.6256	32.9499	32.6169	33.0896	32.2829	33.2041
O14907;A0A087X282	O14907;A0A087X282	Tax1-binding protein 3	TAX1BP3	TAX1BP3	30.5646	30.4988	30.0258	30.2873	30.5916	30.4268	30.5684	29.8028	29.4959	29.8258	29.6219	29.8866	29.9564	30.0519	29.9147	29.1461	30.3142	29.8008	30.4072	29.6206	29.6628	30.0739	29.9321	29.0551	30.1705	30.2784	30.8747	30.0054	30.5376	30.2173	30.2392	30.2836	29.384	30.7541	29.5864	30.5791	29.4079	29.6364	29.9126	30.7867	30.5487	30.4387	30.2014	30.3106	30.361
O14908;O14908-2;K7EM11;K7ESN1;K7ELJ2	O14908;O14908-2;K7EM11	PDZ domain-containing protein GIPC1	GIPC1	GIPC1	27.0507	23.5567	22.4117	24.4464	23.7275	25.6923	25.252	25.8414	25.5086	22.4394	23.9467	23.3109	22.402	26.1638	24.12	23.7697	23.3044	23.6618	22.3057	24.7286	24.7661	23.5823	25.4802	24.7724	24.2295	23.0119	25.3552	23.8997	24.3686	23.8475	23.2891	24.7252	24.7709	23.3316	25.5315	24.2106	24.0856	24.8691	22.3148	23.7018	22.7795	23.6948	25.6483	23.5329	24.9345
O14910;H0YIA8;H0YI92;J3KN23	O14910;H0YIA8;H0YI92	Protein lin-7 homolog A	LIN7A	LIN7A	23.7671	25.8251	23.9045	24.3725	25.4331	25.5996	23.3195	24.9881	21.6419	24.0214	24.8393	22.8834	23.4546	24.4918	22.889	24.2529	24.2274	25.4893	24.0277	22.9577	24.3465	24.0699	24.5307	24.1022	22.7252	24.0675	24.404	22.8062	25.3626	25.6674	23.4498	22.3861	23.992	25.057	22.7393	22.8095	23.4716	22.7493	26.3209	24.7847	24.2515	25.1777	23.7949	25.1919	25.5577
O14925;B4DDK6	O14925	Mitochondrial import inner membrane translocase subunit Tim23	TIMM23	TIMM23	27.9149	27.8671	27.8596	27.1699	27.8539	28.0498	28.4727	27.0556	28.275	28.3508	28.0055	28.4491	28.6283	27.8895	22.7348	28.6393	28.1187	28.1858	28.3439	28.7912	27.7021	28.1096	27.7638	27.5704	26.6271	28.5184	27.1807	27.8297	27.2181	28.268	28.2358	28.2155	28.1093	28.134	28.6257	28.308	25.3633	27.2924	23.8732	26.6067	26.4429	23.5228	28.6514	23.7986	25.9438
O14949	O14949	Cytochrome b-c1 complex subunit 8	UQCRQ	UQCRQ	31.5132	31.1558	31.0781	31.2615	31.217	30.8155	31.032	31.899	32.3604	32.353	32.9408	32.3714	32.8052	31.8511	32.3118	32.2402	32.1052	32.6472	32.2633	32.372	32.9512	32.2944	32.2913	32.546	31.5595	31.7202	32.1984	31.2601	31.493	31.599	31.4226	32.1581	31.6356	31.6487	31.2838	30.745	32.4262	33.127	31.2741	32.3698	32.4751	31.2773	31.3523	31.791	30.8571
O14950	O14950	Myosin regulatory light chain 12B	MYL12B	MYL12B	23.6153	23.7525	24.115	25.515	22.8197	23.7511	23.2428	23.7054	25.0477	25.5257	25.8267	24.6529	25.4105	27.3774	26.174	27.391	24.8035	25.8066	26.7953	26.5234	26.973	26.9409	26.0792	24.9893	25.9401	26.3153	23.6892	26.3715	22.4703	25.3289	23.9613	22.0187	25.2355	22.3896	24.3608	21.8714	28.0664	25.2567	25.2816	24.2201	26.2654	23.7116	24.6083	23.8334	23.9724
O14957	O14957	Cytochrome b-c1 complex subunit 10	UQCR11	UQCR11	29.6509	30.794	29.6821	31.0709	31.7942	30.1918	30.9428	30.3113	31.749	31.4242	30.8753	31.7119	31.2055	31.2126	30.5386	32.1349	32.3941	32.4049	31.7942	31.967	30.9073	31.7733	32.5528	31.1525	30.8369	31.1816	29.9389	30.9353	31.2063	31.6142	32.5311	30.5531	26.1912	31.8998	29.1479	31.0721	31.0731	31.3752	29.8645	30.4953	31.1529	29.6779	27.896	28.5437	28.9973
O14958;O14958-2	O14958;O14958-2	Calsequestrin-2	CASQ2	CASQ2	36.1226	35.9555	35.5173	35.8414	35.9127	35.4936	35.8998	36.1018	35.9554	36.2756	36.2614	36.1122	35.9634	35.7846	36.046	35.5776	35.6168	35.968	35.5076	35.739	36.0816	36.1519	36.3082	35.3848	35.632	35.1608	35.6993	35.6908	34.956	35.9215	36.0454	35.131	33.4543	35.0948	35.1766	35.5897	36.7048	35.7316	35.5036	35.5444	35.9875	35.8363	35.3266	35.9089	35.2766
O14964;O14964-2;I3L1P5;I3L1E3;I3L165;I3L2H4	O14964;O14964-2;I3L1P5	Hepatocyte growth factor-regulated tyrosine kinase substrate	HGS	HGS	26.8693	27.421	27.1339	26.9125	25.39	27.2564	27.4602	27.515	26.4865	25.9687	26.6558	26.5888	26.9174	28.4157	27.8476	27.6802	27.3076	26.695	25.0921	26.7882	28.1257	26.7882	26.8834	28.1615	27.3454	26.545	24.3551	26.6536	23.1904	27.2512	27.2399	27.2914	26.6963	25.5249	27.7885	26.7737	26.7387	28.1129	26.7318	27.1803	26.6672	27.5368	27.2201	27.0145	26.7571
O14967;O14967-2;D6RAZ4	O14967;O14967-2	Calmegin	CLGN	CLGN	29.2902	30.1982	29.8081	30.153	30.0974	29.8711	30.1769	30.3093	30.0242	30.8579	29.9078	29.22	30.4418	28.765	30.4142	30.0297	30.1163	29.4956	29.7559	30.058	29.9589	30.5183	30.3035	29.8749	29.8975	30.3858	30.4806	29.6556	30.2468	30.3569	29.953	30.48	27.024	30.5543	30.0994	30.1576	29.8938	30.4734	29.9167	30.082	30.9482	30.1955	29.4857	30.3542	29.2899
O14972-2;O14972;A8MTY9;A8MY26	O14972-2;O14972;A8MTY9;A8MY26	Down syndrome critical region protein 3	DSCR3	DSCR3	26.6734	27.3572	24.5041	27.1021	27.5764	27.0398	27.0305	27.3993	26.8893	27.1517	27.1834	27.0804	26.3782	27.1076	26.6967	27.0738	27.7639	27.2283	27.3158	27.27	26.604	27.1423	27.472	27.0292	26.6697	27.7791	27.1266	26.9707	27.0614	27.3403	27.4827	27.3492	26.9569	26.1902	27.3537	26.5963	23.2488	26.7802	26.9298	25.043	26.1183	27.4479	27.4547	24.2309	26.9725
O14974;O14974-5;O14974-3;O14974-2;H0YHI8;H0YIS3;A0A0U1RQZ1;H0YHL8;H0YIL7	O14974;O14974-5;O14974-3;O14974-2	Protein phosphatase 1 regulatory subunit 12A	PPP1R12A	PPP1R12A	29.6887	29.4066	29.6702	29.4419	30.1413	30.2007	29.5203	29.3533	28.8836	29.9392	29.5888	29.945	29.8677	30.0833	30.0661	29.4872	29.7107	29.8448	29.7692	29.6233	29.6355	30.0108	29.1091	29.7543	30.3181	30.0056	30.2212	29.7099	30.1352	29.3576	29.6918	29.7712	30.8971	29.9313	29.7536	29.3819	30.0576	30.1204	30.8796	30.5285	30.6038	29.3592	30.0581	29.8175	29.9662
O14980;C9JKM9;C9IZS4;C9JQ02;C9JV99;F8WF71;C9JF49;C9IYM2	O14980	Exportin-1	XPO1	XPO1	29.7998	30.048	29.651	30.0127	29.8187	30.2268	30.3816	29.4374	29.7035	30.2017	30.0381	29.7795	29.299	30.2533	30.3105	30.2319	30.2466	29.9387	29.7334	29.9615	30.0735	30.0576	29.9086	29.814	29.982	29.8415	29.6514	30.1823	29.9068	29.9386	29.9781	29.5513	29.7187	29.9546	29.6312	30.6616	30.5768	29.9892	30.0108	30.4112	29.9148	29.467	29.4086	29.2762	29.221
O15020-2;O15020;A4QPE4	O15020-2;O15020;A4QPE4	Spectrin beta chain, non-erythrocytic 2	SPTBN2	SPTBN2	27.824	22.3006	24.8532	24.6021	26.3476	24.8337	25.0184	25.3167	22.4188	24.8505	23.3119	22.6929	24.122	27.7941	24.2544	24.9183	23.5858	23.9583	25.7085	24.1463	24.1639	24.4564	24.9167	24.0329	26.5052	26.7205	27.614	27.4272	22.9187	26.5101	26.9271	26.0661	24.0434	24.0443	25.4917	27.0476	24.1864	23.543	28.0593	27.8619	24.9228	28.0289	26.2834	24.9365	27.9838
O15027-5;F1T0I1;O15027;O15027-2;O15027-4;O15027-3;A0A3F2YNX0;A0A3F2YNZ0;X6RGP5;A0A0C4DH09;Q8N9G1	O15027-5;F1T0I1;O15027;O15027-2;O15027-4;O15027-3;A0A3F2YNX0;A0A3F2YNZ0	Protein transport protein Sec16A	SEC16A	SEC16A	24.3272	23.3039	22.262	23.6257	23.2597	24.5204	26.9715	25.5936	24.3759	26.9768	24.5245	23.7897	27.0684	26.6645	26.7873	27.0691	27.7982	26.9272	27.1669	27.5269	25.6281	26.5464	26.9663	27.3369	26.9135	27.6931	24.1798	23.4446	26.7884	26.0771	23.5066	26.9091	24.1336	27.6164	24.3493	25.2844	23.5004	27.0332	25.7376	25.5265	26.3126	22.2747	24.944	23.5323	24.5811
O15031;A6QRG9;E2PU09;A0A087WU36;A6QRH1;H0Y7X5;H0Y6J7	O15031	Plexin-B2	PLXNB2	PLXNB2	23.5238	30.5031	22.9567	29.2539	29.7069	30.1131	30.1126	30.2061	22.0713	28.2333	30.5637	27.9691	24.9829	27.1231	27.623	27.1625	28.5313	25.6122	24.2305	27.7474	26.8831	28.0626	28.6944	27.6604	23.9732	28.32	29.2791	29.4367	24.6663	30.5381	29.7744	29.4353	24.6931	26.7677	23.5347	28.3774	24.566	28.104	24.3962	28.3023	27.8681	24.7431	30.5462	24.221	26.6951
O15061;O15061-3	O15061	Synemin	SYNM	SYNM	34.0955	34.1276	33.9521	33.9047	34.2912	34.4193	34.1165	33.6129	33.5883	33.4433	33.2131	33.7009	33.5098	33.5065	33.7915	33.1756	33.5863	33.5817	33.2815	33.7565	33.2821	33.438	33.4662	33.6771	34.1072	33.7433	34.1828	33.9105	34.0678	33.6338	33.9778	34.28	33.9652	33.6927	34.4161	33.9455	33.6833	33.8502	33.827	34.4507	33.9888	33.8902	33.9185	33.885	33.8189
O15067;H0YGH1;J3KT98;J3QSG0;J3QSH6;J3KTL4;J3KTQ5;J3QL39	O15067	Phosphoribosylformylglycinamidine synthase	PFAS	PFAS	27.6446	27.8108	28.2559	27.9882	27.9146	27.2243	28.1962	27.4985	28.6686	24.7291	27.3847	23.5846	27.0488	28.167	27.997	28.6346	23.2721	27.0619	27.9379	26.8102	29.7136	28.2394	28.6269	28.9996	24.3693	24.3929	28.7725	26.7709	22.7345	27.3148	24.1163	27.1202	26.87	27.81	28.2086	27.4746	23.6376	26.8853	27.8386	23.3889	28.4216	27.5348	28.3219	27.1744	27.9353
O15075-2;O15075;Q5VZY9;O15075-3;O15075-4	O15075-2;O15075;Q5VZY9	Serine/threonine-protein kinase DCLK1	DCLK1	DCLK1	25.3698	24.6205	24.7649	25.6906	24.6811	26.2065	24.4544	23.2966	23.8399	24.018	23.134	24.9349	25.0521	23.6927	22.7022	24.2366	23.6164	24.6677	24.6911	23.9334	25.126	25.8968	22.5557	23.9645	25.2784	25.2294	23.9633	25.2434	23.4791	24.6001	25.1543	23.8088	26.9327	25.735	27.4737	24.9945	23.6549	23.4832	25.1038	25.9495	24.9882	26.6455	23.2476	24.0008	24.137
O15116;E5RJ47;E5RH18	O15116	U6 snRNA-associated Sm-like protein LSm1	LSM1	LSM1	27.8428	26.8635	26.2824	26.3203	21.8285	23.6763	25.7317	22.9215	25.7238	25.4618	26.2896	24.2031	23.3299	26.371	25.8967	25.7844	27.3371	23.8954	25.327	26.2633	25.0934	26.409	26.0927	25.5738	27.2029	24.9868	24.957	26.9518	25.5553	24.1059	26.642	22.7329	25.8267	27.0558	24.232	26.6512	23.7786	26.0445	26.396	21.7241	25.3478	26.0633	26.766	25.3881	26.9916
O15126;A0A087WXB0;O15126-2;A0A087WZA6;A0A087WU14;A0A087WTX8	O15126;A0A087WXB0;O15126-2	Secretory carrier-associated membrane protein 1	SCAMP1	SCAMP1	26.0205	25.2938	22.9311	22.7121	25.3957	26.3124	26.1239	27.0411	23.5558	24.7457	25.9899	23.1116	27.2437	25.5099	25.9484	26.641	26.4568	26.6718	26.9008	24.7078	26.4283	25.4091	26.6484	26.3499	27.5548	27.6538	26.5865	26.4926	27.5669	26.5017	25.4147	26.771	28.0388	26.887	26.9196	25.8309	27.3243	26.707	27.7755	27.2534	25.6788	26.2708	27.4225	25.5383	25.7076
O15127	O15127	Secretory carrier-associated membrane protein 2	SCAMP2	SCAMP2	26.3751	26.0239	24.4783	24.7767	25.3103	26.8215	24.2489	23.0564	26.3406	25.3284	26.3477	24.2834	25.8024	26.2518	26.4468	27.2799	26.9655	25.1576	25.894	26.8954	26.1002	26.6846	23.4153	23.461	23.7367	22.8187	27.1859	25.6237	26.7296	25.0611	25.9587	26.6951	27.2426	23.2797	26.3557	23.7263	22.1111	26.1374	26.2698	25.9151	26.6788	23.5917	25.7917	24.1511	26.7542
O15143;C9JEY1;C9K057;C9J4Z7;F8VXW2;C9JQM8;C9JFG9;C9J6C8;C9JBJ7;C9JTT6;C9JM51;F8WEB3	O15143;C9JEY1;C9K057;C9J4Z7;F8VXW2;C9JQM8;C9JFG9;C9J6C8	Actin-related protein 2/3 complex subunit 1B	ARPC1B	ARPC1B	23.2302	23.3038	23.4189	22.7059	23.8013	24.9823	24.9867	22.2818	24.4424	24.8516	24.2014	21.8707	25.1247	26.4252	23.8313	25.0135	25.9803	24.9774	24.1572	24.9584	24.3254	25.478	22.9953	23.9419	24.7298	24.2181	23.1506	25.9442	26.6203	24.168	23.1554	24.5908	24.2004	21.9644	24.5306	23.9782	23.5858	24.0356	26.0282	25.1715	25.4834	24.0498	23.5484	23.4097	23.0571
O15144;H7C3F9;C9JTV5;G5E9J0;G5E9S7	O15144	Actin-related protein 2/3 complex subunit 2	ARPC2	ARPC2	30.704	30.4124	31.0404	30.8321	30.7274	31.2097	30.5222	30.6707	30.581	30.4974	29.9697	29.9749	30.2406	30.6659	30.1931	31.2149	29.7283	30.5742	30.3327	30.5798	30.1225	29.7043	30.3865	30.3954	30.7474	30.7003	30.5968	30.3694	30.8522	30.7503	30.4794	30.4939	31.2754	30.7178	30.752	30.5808	30.1577	30.6197	31.0299	30.6183	30.5504	29.9524	30.113	30.4173	30.0594
O15145;C9JZD1;F8VR50	O15145	Actin-related protein 2/3 complex subunit 3	ARPC3	ARPC3	29.2605	28.7698	29.288	29.4959	29.7028	29.5678	29.3459	29.4874	29.2412	29.0201	29.2439	28.9014	29.1159	29.9147	29.4222	29.8261	29.0006	29.0193	29.0606	29.3277	29.8142	28.4613	29.7185	29.3994	29.317	29.9611	29.1361	29.3855	28.9123	29.5199	28.968	29.1037	28.8612	29.5398	29.6462	29.2376	29.0019	28.8753	29.4267	28.8466	29.562	28.9515	28.6805	29.303	28.8999
O15173;U3KQM0	O15173	Membrane-associated progesterone receptor component 2	PGRMC2	PGRMC2	29.4379	29.8343	30.0733	29.7779	29.7342	30.3554	29.8296	29.7137	29.5815	29.9074	30.1381	30.0251	30.0136	30.2794	29.9753	29.6229	29.7007	30.1886	29.8487	29.9347	30.1995	29.8118	29.6351	30.4469	29.4232	29.8219	30.0461	30.2107	30.0478	29.8345	29.9611	30.0611	29.8493	29.3611	30.4446	29.8831	29.7011	29.7885	29.3004	29.5799	30.3863	29.8015	29.5929	29.5934	29.1532
O15212;A2AB88	O15212;A2AB88	Prefoldin subunit 6	PFDN6	PFDN6	29.2077	29.2047	29.4616	29.4384	29.3004	29.3304	29.8572	29.573	30.0285	29.5766	29.6084	29.4486	29.3513	29.8481	29.0146	29.7321	29.6298	29.3422	29.4151	29.3328	29.4887	29.497	29.3119	29.4033	28.8428	29.0364	29.5134	29.0528	29.273	30.0061	29.5763	29.8489	29.5254	29.7161	30.0225	29.7605	29.055	29.0027	28.7193	29.2547	28.9892	28.9695	29.1986	28.8422	29.2111
O15228;O15228-2;Q5TBH8;Q5TBH6;A0A2R8YH69	O15228;O15228-2;Q5TBH8	Dihydroxyacetone phosphate acyltransferase	GNPAT	GNPAT	22.7983	25.2465	23.5483	24.2602	24.078	23.0985	24.1517	22.8318	26.0655	23.7997	26.5759	24.3174	25.991	24.5222	26.7982	26.3534	24.9159	24.6392	23.6778	26.1563	25.9299	25.9852	26.011	24.4779	25.2077	27.0399	25.294	26.2723	25.9915	23.6724	25.7138	24.04	23.2412	25.9311	23.8686	26.1805	24.0054	26.0704	24.2387	26.5373	25.6127	23.0782	24.2658	24.6416	23.0272
O15230;O15230-2;A0A087WYH7	O15230	Laminin subunit alpha-5	LAMA5	LAMA5	33.2186	33.1364	32.7112	33.175	32.9265	33.3797	32.8087	32.9644	32.8608	33.3146	33.0117	33.0268	33.1485	32.0983	32.9445	32.5383	32.9666	32.7802	32.7738	32.7311	32.7969	33.1152	32.8394	32.7478	33.3776	32.4177	33.0723	33.0462	32.9169	32.7546	32.8749	32.8434	33.6069	33.2191	33.5863	33.2807	32.8934	32.9266	33.453	33.1597	33.2964	32.3991	32.3507	32.5411	32.4015
O15235	O15235	28S ribosomal protein S12, mitochondrial	MRPS12	MRPS12	22.4338	23.0244	23.4609	24.9435	24.3524	23.9338	23.6381	26.6199	26.115	25.0288	25.6486	25.8494	26.3748	23.7798	24.5025	25.4772	25.631	23.7368	26.5056	24.6963	24.4702	25.5849	26.0127	24.4412	23.9545	25.8557	24.8019	25.3439	23.6264	25.6567	25.2063	23.3768	25.8589	25.82	25.2779	24.0966	25.5477	24.917	22.6729	24.4233	24.1534	24.9223	25.1839	24.338	24.7647
O15239	O15239	NADH dehydrogenase [ubiquinone] 1 alpha subcomplex subunit 1	NDUFA1	NDUFA1	29.0315	30.5162	29.4238	28.6864	29.198	29.4363	29.2477	29.3821	29.2397	30.4955	31.1607	30.3254	31.1159	29.821	29.1092	29.9643	30.5492	30.2835	30.6773	30.5324	30.2488	29.9866	28.644	30.5703	28.8219	28.8596	29.6205	30.1199	29.3193	29.139	30.5048	27.9433	28.4482	28.8844	24.6651	30.1841	29.1577	29.4642	28.9004	29.8013	29.644	28.978	27.3542	24.0796	29.3093
O15247;A6PVS0	O15247;A6PVS0	Chloride intracellular channel protein 2	CLIC2	CLIC2	27.2532	27.2536	27.9135	27.3684	27.2844	26.8174	26.5666	28.2263	27.4078	27.4881	27.1491	26.9692	26.5731	26.6675	28.2161	27.6456	28.3171	27.4331	27.9016	27.6979	28.6711	26.1045	27.552	27.6342	27.33	27.7146	28.2916	26.5126	27.9049	27.1285	28.0982	28.7289	28.1307	27.5326	28.3946	27.2345	27.8829	25.5724	27.7554	27.5908	27.4737	27.7631	28.1281	27.0348	26.9164
O15254;O15254-2;D6RJ89	O15254;O15254-2	Peroxisomal acyl-coenzyme A oxidase 3	ACOX3	ACOX3	27.8987	26.2645	26.1318	25.7489	24.0204	25.2081	26.3488	23.8369	26.0025	26.6132	26.1488	26.6642	26.2765	24.9818	28.3424	26.2189	26.278	26.055	26.9022	26.8021	27.9533	26.7176	27.2061	28.2386	27.3122	27.2962	26.8207	26.7387	26.696	26.4896	27.023	22.6114	26.2337	22.7522	26.4329	25.95	22.7634	26.1574	26.8394	26.319	25.9279	26.5122	27.2144	24.144	26.2257
O15258;Q5T092;A0A0A0MR06;Q5T091;Q5T093	O15258;Q5T092;A0A0A0MR06;Q5T091;Q5T093	Protein RER1	RER1	RER1	27.9684	28.1978	27.2867	27.0532	27.4044	27.8798	26.8768	27.3801	27.8128	27.549	27.793	27.0255	27.7923	27.7465	27.7024	27.7394	27.4878	28.5959	27.496	27.6958	26.7837	28.6479	26.5265	27.8497	27.8087	28.7161	27.9933	27.1518	27.5814	27.1394	28.7518	27.2181	28.2605	26.2324	27.9968	27.6232	23.634	27.372	27.0204	27.677	26.7574	25.7493	26.8185	27.5989	27.7672
O15260;Q5T8U5;O15260-2;B7Z1G8;O15260-3	O15260;Q5T8U5;O15260-2;B7Z1G8;O15260-3	Surfeit locus protein 4	SURF4	SURF4	29.6703	29.9792	29.2758	29.4594	29.8267	30.1994	29.9304	29.4974	29.755	30.6103	30.6219	29.468	29.9287	30.3628	29.5678	30.5248	29.938	29.992	29.4342	30.0085	30.3841	29.7393	29.9356	29.7816	29.7244	29.6923	29.3407	29.8307	30.3052	30.1707	29.9093	30.1419	29.3374	29.5799	28.5562	30.2195	29.5434	29.0882	29.0336	29.2798	29.4474	28.3288	27.9257	28.3964	29.4577
O15270;H0YJV2;Q9NUV7	O15270	Serine palmitoyltransferase 2	SPTLC2	SPTLC2	28.359	26.455	27.7171	29.9278	27.6982	26.8769	27.2355	26.5472	27.9571	26.1314	27.4415	27.7184	27.4173	26.6747	26.3209	20.0289	25.6514	23.6755	26.8867	26.9804	25.6165	27.5376	26.8033	20.7756	27.2736	28.2942	27.8848	27.5593	28.1779	26.7742	26.907	26.664	27.7406	27.0242	27.8102	26.6364	29.3099	28.3566	30.0093	29.1263	28.7256	28.3894	28.8659	29.6453	28.2909
O15273;J3KT40	O15273;J3KT40	Telethonin	TCAP	TCAP	31.8527	31.889	31.5199	31.1399	31.6639	31.4112	31.7181	32.0247	31.5338	30.9238	31.9241	31.829	32.0452	31.7981	32.3141	31.6922	31.6935	31.8875	31.5359	32.3229	30.8939	32.0607	32.1197	32.1627	31.8676	31.3701	31.909	31.2103	31.4402	31.677	31.652	31.2853	31.8418	31.281	31.5342	31.6703	30.7363	32.223	30.9593	29.0845	31.9133	31.0126	32.0712	31.0747	31.2346
O15294;O15294-2;O15294-4;C9JZL3	O15294;O15294-2;O15294-4	UDP-N-acetylglucosamine--peptide N-acetylglucosaminyltransferase 110 kDa subunit	OGT	OGT	28.6541	27.9253	26.9528	28.3037	28.0248	27.6403	27.4064	28.0145	27.4076	27.714	27.8604	27.7623	27.7998	28.3451	28.6373	28.7776	28.4344	29.005	27.5379	28.8472	28.1311	28.2197	27.4654	28.3683	27.8307	28.0371	28.4529	27.6845	26.7205	28.336	28.0651	27.8987	29.0722	27.542	29.0495	27.0993	25.3549	28.0818	27.1763	27.6077	27.6533	26.6959	28.2359	23.1164	26.6737
O15305;H3BV55;H3BRM0;H3BPH4;O15305-2;H3BR08;H3BM92;H3BV34;H3BT06;H3BNY9	O15305;H3BV55;H3BRM0;H3BPH4	Phosphomannomutase 2;Phosphomannomutase	PMM2	PMM2	25.7715	24.886	22.6626	25.8291	25.8259	26.867	23.4204	26.4179	26.05	25.802	25.5091	24.3891	23.623	25.8678	25.2414	26.2841	24.6158	22.8607	24.5705	25.9908	26.1302	25.8637	25.7161	22.4645	24.5601	25.5377	25.4379	22.3282	31.5906	26.8517	26.1313	25.9887	26.7212	25.4547	26.6002	25.6673	25.2011	29.8448	25.0157	25.0581	29.2088	23.3049	25.8403	28.6236	25.593
O15327	O15327	Type II inositol 3,4-bisphosphate 4-phosphatase	INPP4B	INPP4B	30.5742	30.6696	30.1952	30.1274	30.2415	30.6664	30.4153	29.2693	29.2588	29.2529	29.7761	29.5566	28.7298	28.9558	29.2734	27.5722	29.3084	29.1828	28.7683	29.2234	28.9864	29.2965	29.2741	28.9988	29.749	30.0012	29.7296	29.6658	29.2703	29.6721	29.8217	29.8229	28.9125	29.3109	29.8944	28.0832	29.3844	29.4884	28.0047	29.4639	29.7881	28.9699	29.6403	29.0908	29.3296
O15355	O15355	Protein phosphatase 1G	PPM1G	PPM1G	29.0893	29.7641	27.6299	29.2596	24.0403	29.4508	27.1816	27.3442	23.0148	26.7925	26.4964	28.7926	24.8216	27.1857	28.2631	28.6018	27.8304	23.3111	34.7545	27.4677	26.7098	27.0486	27.3744	24.8053	27.2773	27.8986	28.1002	28.4903	23.3437	27.7998	23.3111	27.7657	29.1736	26.4377	25.6762	23.5547	24.5029	25.0599	25.4008	22.6307	25.8036	22.8179	23.3042	27.3877	24.2957
O15357;A0A0A0MTP6;O15357-2;F5GY16;H7BXR2;H0YFZ4;F5H588	O15357;A0A0A0MTP6;O15357-2	Phosphatidylinositol 3,4,5-trisphosphate 5-phosphatase 2	INPPL1	INPPL1	25.4489	24.7458	25.2755	25.5776	25.8488	26.234	25.275	25.229	23.8521	25.6114	26.934	26.5822	27.0305	25.9029	26.0196	25.6276	26.7433	23.5684	25.133	24.0091	23.6891	26.3027	26.6133	25.8939	26.0888	25.9517	25.8248	25.6084	23.7682	26.1712	22.6969	26.3296	26.326	26.6182	26.7969	25.3439	26.1411	26.5685	25.5609	25.6608	26.7453	22.8005	26.1115	24.7958	26.9891
O15371-2;O15371-3;O15371;B0QYA5;B0QYA6;B0QYA8;B0QYA4	O15371-2;O15371-3;O15371	Eukaryotic translation initiation factor 3 subunit D	EIF3D	EIF3D	29.276	29.0447	28.7308	29.07	29.6114	29.2294	29.1117	29.7306	29.3039	29.1399	28.923	28.9878	28.3788	29.7086	29.3437	29.7458	28.7615	28.6501	28.9563	29.4237	28.7854	28.6951	29.0354	29.4921	29.1886	29.02	29.3616	29.0742	29.4969	29.2697	29.2953	29.0623	29.8107	29.0456	29.4894	29.3568	28.7346	29.5179	29.0663	29.2645	29.5741	29.2695	29.3373	29.1599	29.3648
O15382;M0QXF9;B3KSI3;O15382-2;M0R2K7	O15382;M0QXF9;B3KSI3;O15382-2	Branched-chain-amino-acid aminotransferase, mitochondrial;Branched-chain-amino-acid aminotransferase	BCAT2	BCAT2	32.6314	32.448	32.5968	32.0991	32.3733	31.975	32.3666	32.9163	32.9124	32.976	32.7141	33.1815	32.8065	32.6544	33.0244	32.7108	32.966	33.0769	32.6253	32.9239	33.1929	32.8413	32.565	32.9364	32.5718	32.7528	32.7491	32.6361	32.9737	33.0223	33.3316	33.0005	32.3212	32.599	32.856	32.8865	32.2809	32.6298	31.9923	32.6682	32.8342	32.1277	32.2415	32.596	31.7705
O15400-2;O15400	O15400-2;O15400	Syntaxin-7	STX7	STX7	30.0166	29.2745	30.4487	29.5001	29.77	30.8172	29.9611	29.7668	29.4938	29.4889	30.0795	28.8233	29.8117	29.8908	30.0647	29.6371	29.7519	29.6169	29.6237	28.908	30.5135	29.0627	29.9345	29.8802	29.372	29.9168	30.4514	29.7055	29.2309	29.5726	30.0654	29.8905	30.7521	30.083	30.6069	30.172	30.5466	29.7978	29.4035	30.0305	30.1568	29.6823	29.3543	29.7103	29.2819
O15439-2;O15439;A0A2R8Y6V8;A0A2R8YDC1;Q8IWU1	O15439-2;O15439;A0A2R8Y6V8	Multidrug resistance-associated protein 4	ABCC4	ABCC4	27.9528	30.1276	23.1355	28.8124	27.716	22.2114	28.2386	29.3748	23.1876	24.0713	22.1426	23.4319	28.6374	24.0974	24.8843	26.9801	24.5982	24.0172	23.465	21.8842	22.6628	26.574	27.5198	23.6441	23.0174	23.8813	23.2662	28.8649	22.5256	26.8582	24.5507	27.1986	23.6175	28.2058	23.5553	22.9891	24.3075	23.498	26.686	22.3912	23.3992	21.3561	23.8126	24.1984	27.862
O15498;O15498-2;H7C3K7	O15498;O15498-2	Synaptobrevin homolog YKT6	YKT6	YKT6	27.3499	26.667	22.4341	27.5132	27.223	28.3123	27.3685	27.206	26.9771	26.4586	26.8931	27.4519	27.2148	28.163	28.4849	27.1323	28.0112	27.3011	26.9367	27.6882	27.1633	27.8191	26.7918	27.1889	26.4654	28.6594	27.2241	27.6921	27.1781	26.9392	28.0172	27.2417	27.1369	26.8762	27.4018	28.0728	26.6991	28.4921	27.3878	26.0651	27.9126	26.563	28.0962	27.3023	27.2069
O15511;B1ALC0;O15511-2	O15511;B1ALC0;O15511-2	Actin-related protein 2/3 complex subunit 5	ARPC5	ARPC5	28.533	28.6424	27.2603	28.1888	28.0078	29.3261	28.5973	28.3326	28.4719	28.7476	27.7394	27.8984	28.0554	28.9944	28.8619	29.1055	27.8612	28.2584	28.6221	28.7574	27.6447	28.2371	27.4478	28.3035	28.4488	28.5597	28.3602	28.0052	28.5234	27.7357	28.5937	28.0676	29.3276	28.3568	28.5102	28.775	27.2884	28.0466	29.0294	28.5974	27.9808	27.6407	27.5769	26.954	27.4601
O15523;O15523-2;O15523-3;C9J081;C9J8G5	O15523;O15523-2	ATP-dependent RNA helicase DDX3Y	DDX3Y	DDX3Y	26.131	26.5136	22.994	22.9612	24.0792	23.3177	22.6576	26.6225	26.015	26.6395	26.1865	26.5593	26.8769	23.5094	22.7661	23.7509	21.7459	24.6355	22.703	24.7303	22.0602	26.4602	27.1059	24.6197	22.3218	27.5216	27.0314	26.6827	26.3082	27.2589	27.0064	25.1504	23.4639	23.1674	26.085	27.0161	24.0071	26.8018	22.8217	23.2035	27.083	24.4022	23.2394	24.5896	23.396
O43143	O43143	Pre-mRNA-splicing factor ATP-dependent RNA helicase DHX15	DHX15	DHX15	28.2787	28.6451	27.8461	28.5491	28.7197	28.6378	28.7869	28.5252	28.4018	28.4523	28.1825	28.2586	27.8784	28.7322	29.0103	29.5657	28.9653	28.4098	27.9641	28.2416	28.3396	28.7084	28.2107	28.6866	28.282	28.513	27.9117	28.2923	28.0012	28.9087	28.8765	29.0494	27.913	28.8241	28.2387	28.4228	27.016	28.1366	27.7779	28.2091	28.3505	27.7	28.055	27.6306	28.2301
O43149;O43149-3;I3L141;O43149-2;I3L3Q3;I3L1Q8	O43149	Zinc finger ZZ-type and EF-hand domain-containing protein 1	ZZEF1	ZZEF1	23.8173	23.3236	24.2608	24.3612	26.5382	22.7557	25.3965	24.5739	23.0061	24.3308	26.2461	23.8669	23.5677	24.4425	24.2247	25.6007	23.4925	25.4041	26.1704	22.6571	24.6627	23.5409	22.9927	23.522	22.6818	26.1048	28.1402	26.2215	23.1889	25.6311	25.5372	23.7566	26.1425	23.0909	25.7577	27.0131	27.601	26.4652	23.8629	25.9768	22.5835	23.4212	26.9311	24.2344	23.0708
O43150;O43150-2;A0A286YFG8	O43150;O43150-2	Arf-GAP with SH3 domain, ANK repeat and PH domain-containing protein 2	ASAP2	ASAP2	24.5938	27.3028	22.9098	26.9685	27.1535	26.6806	27.1561	24.2378	24.02	26.4057	23.5251	24.2269	27.4499	27.9151	25.0324	24.4238	22.9511	28.0231	23.1176	23.3605	23.6353	23.9465	24.3714	23.2913	23.1476	23.6311	26.4003	26.0532	26.6523	27.281	22.9804	27.3777	24.5336	22.7938	22.9969	24.6941	24.3466	22.8201	23.7346	24.4954	21.747	22.4078	23.0059	23.933	26.7471
O43169;H3BUX2;D6RFH4;J3QR91	O43169;H3BUX2;D6RFH4	Cytochrome b5 type B	CYB5B	CYB5B.1	21.8666	21.2478	23.6124	21.1843	20.9357	20.8519	20.5539	22.4229	22.4723	23.1372	23.1791	21.8511	23.0143	23.3831	24.3399	21.6529	22.4862	25.1672	23.5765	23.0263	23.4456	23.25	22.3252	22.5705	22.5385	20.5568	22.5817	21.7412	24.1062	20.8317	22.0771	22.4139	24.5832	22.2101	21.1694	21.6876	23.8078	23.4608	24.0328	22.0413	17.4426	22.0757	21.4203	25.1823	26.2898
O43172-2;O43172	O43172-2;O43172	U4/U6 small nuclear ribonucleoprotein Prp4	PRPF4	PRPF4	23.0674	22.9553	23.3967	26.3053	23.511	22.892	21.8286	22.7815	25.9523	25.7661	27.9591	23.9937	22.4026	25.9877	26.1233	25.9518	24.202	23.2068	23.3164	24.4858	23.6352	25.7051	25.7885	25.9458	26.0357	22.3238	25.7968	22.9706	24.7524	22.7815	24.7952	22.0174	26.2936	25.9063	25.8772	26.2597	23.139	25.0584	22.8394	23.7415	22.3036	23.1311	23.0907	24.5685	23.6389
O43181;H0Y9M8	O43181	NADH dehydrogenase [ubiquinone] iron-sulfur protein 4, mitochondrial	NDUFS4	NDUFS4	32.4577	32.8283	32.752	32.8936	32.8214	31.9745	32.4174	33.1954	32.8857	33.6777	33.3817	33.0744	33.759	33.0669	33.5637	33.0378	33.7925	33.5878	33.4924	33.2594	33.6385	33.978	33.3709	33.3028	33.5188	33.2447	33.4264	32.7226	32.8566	33.1748	33.5288	32.6657	32.9218	33.4486	32.665	33.1417	33.2226	33.8951	32.9842	33.2095	33.6964	33.0186	32.899	33.1286	31.9315
O43182;O43182-4;O43182-2;H7BYE6;O43182-5;O43182-3	O43182;O43182-4;O43182-2;H7BYE6;O43182-5;O43182-3	Rho GTPase-activating protein 6	ARHGAP6	ARHGAP6	26.4128	26.2604	25.6326	26.3593	25.8267	25.5042	26.6094	24.0395	23.5409	23.282	23.3867	24.8598	25.6014	25.3264	24.4101	25.4637	24.5672	22.7899	23.875	23.2305	25.1741	24.3595	22.6867	24.3719	22.8142	23.7276	22.7836	23.4695	24.052	27.3748	26.4639	27.7019	26.085	27.1791	27.6415	24.1089	23.1313	22.8629	25.1055	22.7842	23.4494	26.9761	21.9255	24.7612	26.4851
O43236-2;O43236-3;O43236;O43236-4;J3KSZ7;J3QRT6;O43236-5;O43236-6;J3QRU3;J3QRS4;J3KS85;J3KS26	O43236-2;O43236-3;O43236;O43236-4;J3KSZ7;J3QRT6;O43236-5;O43236-6	Septin-4	SEPT4	SEPT4	23.3228	22.6811	22.8081	23.4555	23.3549	22.0174	22.2382	24.5864	24.7471	24.0655	24.647	24.1198	23.7533	23.3435	24.3987	22.0432	24.1629	24.0264	22.6602	23.9158	23.3834	23.8722	24.5954	24.2748	24.9573	25.222	23.6501	22.9803	22.8489	22.4901	22.3155	24.1754	24.1426	24.4218	22.9149	22.9532	24.2231	24.3569	25.6155	24.9937	23.9888	24.2638	26.4489	25.6373	23.7332
O43237;O43237-2;B4E2E0;J3KRI4;H3BUM4;J3KRZ2;J3KSD2	O43237;O43237-2	Cytoplasmic dynein 1 light intermediate chain 2	DYNC1LI2	DYNC1LI2	28.7045	28.8072	29.1455	29.3292	29.0188	29.3869	29.2713	28.3846	28.5235	29.1896	28.4987	29.4063	28.6335	28.9646	29.2291	28.7814	28.6091	29.0147	28.6773	28.9718	29.4946	28.9688	28.4893	29.1024	29.1644	29.6953	29.0072	29.3172	29.3105	29.4898	29.3658	29.1115	29.005	29.1267	28.6091	29.6178	29.7444	28.7325	29.2306	29.0324	29.0483	29.2454	28.9529	29.2546	28.9674
O43242;O43242-2;H0YGV8;F5H8K4	O43242;O43242-2	26S proteasome non-ATPase regulatory subunit 3	PSMD3	PSMD3	30.6621	30.501	30.6099	30.4586	30.9537	31.0324	30.7045	30.7074	30.5455	30.9151	31.0003	30.5184	30.8549	30.8272	30.6507	30.8416	30.4067	30.5009	30.5925	31.006	30.7338	30.6515	30.7973	30.8697	30.8983	30.7927	30.5404	30.8853	30.939	30.7335	31.0359	31.0549	31.5541	30.6193	30.9461	30.5949	30.648	30.8043	31.2032	31.042	30.5177	30.7282	30.664	30.5367	30.3001
O43264;O43264-2;F5H3C1	O43264;O43264-2	Centromere/kinetochore protein zw10 homolog	ZW10	ZW10	27.9006	24.9894	25.4985	23.2984	24.2678	25.1058	25.0397	26.1805	25.7662	26.1923	26.6271	25.8981	25.5319	26.6112	26.2038	26.3793	26.6417	26.3228	25.9678	25.8592	26.432	26.3365	26.1651	26.1781	24.1307	23.636	25.5981	23.3905	25.7813	25.4409	24.6186	25.1946	26.4628	25.2181	26.4737	23.7291	23.1902	25.491	24.6167	25.5942	26.0825	24.6503	27.6848	23.7519	27.0141
O43293;O43293-2;M0R0D0;M0QYW5;M0QYY8	O43293;O43293-2	Death-associated protein kinase 3	DAPK3	DAPK3	27.534	27.5151	27.1976	26.9756	26.7695	27.1056	27.3217	27.9698	25.3512	24.8806	25.601	28.4062	26.9931	28.3229	28.0651	28.3827	26.2076	23.3624	23.0467	28.5884	26.9677	26.8051	27.9926	27.1007	27.2822	27.4143	26.1297	24.3746	28.8625	29.6595	27.6668	25.7367	27.7199	27.4468	26.2585	26.4214	23.7584	25.5035	23.7243	27.3988	22.5981	23.9408	26.2166	25.459	27.3732
O43294;O43294-2;H3BSN4;H3BQC4;H3BS04;H3BN49;I3L209	O43294;O43294-2	Transforming growth factor beta-1-induced transcript 1 protein	TGFB1I1	TGFB1I1	28.0571	27.5769	26.2061	29.1524	28.4991	29.4742	28.4127	26.4271	27.6075	28.2811	28.3591	27.3161	27.9129	28.4464	28.0309	27.8029	28.293	27.8189	27.5793	27.9703	28.4986	28.2035	28.1718	28.029	28.6794	28.4709	28.6847	28.7985	28.5684	28.7479	28.4782	27.7828	29.8713	29.1268	29.5487	29.3116	30.0182	27.7841	30.5254	24.4144	29.1172	28.5637	28.1628	27.3702	28.975
O43301;A0A1B0GTF3;K7ENF6;K7ELE6	O43301;A0A1B0GTF3	Heat shock 70 kDa protein 12A	HSPA12A	HSPA12A	28.958	28.1004	28.9934	28.7225	29.128	28.5168	28.8571	28.5863	28.9431	29.408	28.9091	28.7447	29.2539	28.9734	28.2397	28.8183	29.9537	28.6892	29.2765	28.7581	29.2584	29.4825	28.9546	28.6576	29.0677	29.7482	29.4344	29.2219	29.9292	28.8493	28.7042	28.8953	30.7359	29.6504	30.1386	29.7928	29.5966	29.0271	30.1677	29.3887	30.1783	29.206	28.9122	29.092	28.7047
O43324;D6RBD7;C9J1V9;O43324-2;H0YAL7;D6RCQ0;H0YAH9	O43324;D6RBD7;C9J1V9;O43324-2;H0YAL7	Eukaryotic translation elongation factor 1 epsilon-1	EEF1E1	EEF1E1	27.9699	27.5661	27.8441	27.4503	27.9393	27.9201	27.388	28.3784	27.7598	28.0303	28.1299	27.5856	26.0304	27.9551	28.3438	29.7767	28.6478	27.6443	27.8213	27.6279	28.1121	27.7935	27.3002	28.1107	27.1606	28.5795	26.8115	27.5049	28.041	27.9281	28.1552	28.2996	27.7761	27.1716	28.0073	27.5992	24.4153	28.0325	27.4608	26.9959	28.3827	28.3166	28.5661	28.348	27.1913
O43325;H3BNK2	O43325;H3BNK2	LYR motif-containing protein 1	LYRM1	LYRM1	25.4816	25.5455	25.8233	27.2759	26.437	27.501	27.3432	26.6103	27.8404	27.5141	26.7287	26.8789	27.1855	26.2454	26.8894	26.9779	27.1399	27.772	27.917	28.0038	26.9614	27.1435	26.6514	26.9027	26.8458	24.8362	27.2121	26.2418	25.6481	27.2662	27.4926	27.4051	27.2248	26.9355	26.247	27.3482	23.6347	27.0014	23.1659	26.8908	26.87	26.6022	26.0866	26.917	25.8397
O43390;O43390-3;B4DT28;A0A286YEZ8	O43390;O43390-3;B4DT28	Heterogeneous nuclear ribonucleoprotein R	HNRNPR	HNRNPR	30.2182	29.5658	29.9355	30.2167	30.4537	30.2616	30.3098	30.5351	29.8399	30.2827	30.0906	29.9205	29.7425	30.8325	30.5692	30.4888	30.1358	30.1419	30.1315	30.3496	29.9894	29.9582	30.0093	29.9847	30.2163	30.3539	30.0688	29.6936	30.6562	30.2398	30.3113	30.3119	31.0989	30.8237	30.5841	29.9588	29.1834	29.7767	30.1182	30.6958	29.8623	29.9293	29.8929	30.058	29.8073
O43396;K7ER96;K7EML9;K7EPB7;K7EME7;K7EKG2	O43396;K7ER96	Thioredoxin-like protein 1	TXNL1	TXNL1	30.3929	30.0239	30.1105	30.1533	30.4251	30.2029	30.3683	30.1403	30.1455	30.2388	29.7723	29.9639	30.0889	30.4944	30.0387	30.0243	29.1761	29.8749	30.1414	29.9883	29.5928	29.8695	29.8844	30.138	30.5699	30.2318	30.2316	30.2803	30.4536	30.4468	30.3507	30.4865	30.8822	30.1155	30.689	30.2702	29.8441	30.0303	29.8461	30.4975	30.399	30.3894	30.3079	30.7716	30.0652
O43399-4;O43399-3;O43399-2;O43399-6	O43399-4;O43399-3;O43399-2;O43399-6	Tumor protein D54	TPD52L2	TPD52L2	25.9445	23.9826	25.9252	24.6795	23.3141	25.2003	22.9049	25.8079	22.6298	24.7294	23.2951	24.9168	22.7477	26.4253	23.8942	25.5287	25.5224	25.5607	25.8525	25.3456	25.642	24.9532	25.3811	25.0311	21.9649	24.6768	25.3484	25.6905	24.1677	25.8437	25.3733	25.5161	24.1385	24.606	24.3993	25.376	23.6723	25.373	24.783	25.434	23.8539	23.4014	24.1654	25.5085	23.5402
O43399-5;O43399-7;O43399;A0A087WYR3;A0A087WZ51	O43399-5;O43399-7;O43399;A0A087WYR3;A0A087WZ51	Tumor protein D54	TPD52L2	TPD52L2.1	30.7054	30.8503	30.4567	30.8785	30.6864	30.6257	30.7351	30.3735	30.0434	29.8767	30.1272	30.3998	30.3089	30.9508	30.5039	30.1554	30.5235	30.086	30.66	30.1791	30.3195	30.6764	30.5359	30.3886	30.7478	30.3814	30.8135	30.7995	30.7586	31.0534	30.8576	31.1351	31.3721	31.2054	31.1689	30.8717	30.2863	30.5741	31.2556	30.2494	30.9068	30.6934	30.6639	30.5427	30.3183
O43402;M0R1B0;O43402-2	O43402;M0R1B0	ER membrane protein complex subunit 8	EMC8	EMC8	25.4229	25.9473	26.4379	25.7952	25.8556	25.8552	26.9071	26.5284	25.8886	27.2708	25.6614	26.3432	25.8092	26.6752	26.7468	26.2429	25.7606	26.374	25.9577	25.5001	25.9382	23.7022	25.9919	25.6472	22.5752	24.6729	23.3966	22.1117	27.5444	26.5618	26.4475	26.1017	25.3245	25.1633	25.3428	26.8579	25.061	25.6556	25.4705	23.4327	25.9488	26.4931	24.9581	24.8898	26.3875
O43414;H0Y4B0;O43414-3;O43414-2;A0A3B3ISV9;F6QUN3;F6UGJ8;A0A3B3IU35	O43414;H0Y4B0;O43414-3;O43414-2;A0A3B3ISV9;F6QUN3	ERI1 exoribonuclease 3	ERI3	ERI3	23.0287	24.8473	23.3826	23.6226	22.6389	25.4242	25.3761	23.3073	22.9418	23.3105	24.8467	23.7012	24.4966	24.0582	24.1022	23.9288	25.7802	23.3065	24.7073	26.8813	25.2025	24.566	25.8757	24.3781	25.6589	25.4555	26.1087	23.0659	23.1615	25.9352	23.7622	25.4137	24.5447	24.2898	25.765	25.8069	24.7439	23.7589	24.5612	23.3527	23.4925	27.3424	26.1064	25.5479	24.5869
O43447;C9JQD4;O43447-2;H0YEL5;A6NM32	O43447;C9JQD4;O43447-2;H0YEL5	Peptidyl-prolyl cis-trans isomerase H;Peptidyl-prolyl cis-trans isomerase	PPIH	PPIH	24.8886	25.0101	26.8708	25.9948	23.7441	26.2563	25.9914	26.4323	24.8615	23.7299	25.0347	25.5801	25.2846	26.2954	23.718	26.5978	25.8817	26.2093	24.8959	24.5548	22.8666	24.4303	25.9816	22.9637	24.5627	24.41	25.3591	26.1115	28.94	23.3119	27.203	26.5359	26.2842	26.0367	25.4082	25.4019	25.4919	26.0203	26.0672	26.3076	27.7188	26.3431	25.9747	25.6783	26.0084
O43464;A0A0C4DG44;O43464-3;O43464-2;O43464-4	O43464;A0A0C4DG44;O43464-3;O43464-2;O43464-4	Serine protease HTRA2, mitochondrial	HTRA2	HTRA2	29.0687	28.857	29.5656	29.829	29.4724	29.9286	29.8785	29.917	29.4499	30.0612	30.0024	29.4125	29.5258	29.1557	30.0579	29.8675	29.8402	29.2381	29.2499	29.1888	29.5367	29.8343	29.859	29.0758	29.5186	29.8472	29.6897	29.3806	29.4536	29.3432	29.3025	29.2365	28.2232	29.8454	29.187	30.2793	31.0349	29.5432	29.0085	29.0247	29.2049	29.7121	29.0879	28.2552	28.8779
O43488;H3BLU7;H7C5H7;Q8NHP1-3	O43488;H3BLU7	Aflatoxin B1 aldehyde reductase member 2	AKR7A2	AKR7A2	30.6865	30.8483	31.6399	31.2148	31.2235	30.73	31.3631	31.3127	31.068	31.0972	31.1028	30.9255	31.354	30.9693	30.6385	30.7991	31.2134	30.7798	31.5155	30.792	31.6878	31.1835	31.5113	31.2583	31.4374	31.2219	31.0337	31.0163	31.0482	31.2722	30.7494	30.873	31.1972	31.1732	31.3731	31.0704	30.3442	31.021	30.7704	30.6096	30.8624	30.569	31.2957	30.9155	30.6603
O43491	O43491	Band 4.1-like protein 2	EPB41L2	EPB41L2	30.2828	29.1595	30.5587	29.9407	29.2613	29.8418	29.6613	29.4106	29.4708	29.6313	29.5513	29.6079	30.1246	29.6136	29.7281	29.8865	29.7491	29.3154	30.0933	29.2581	30.1458	30.0314	29.7097	29.4705	29.8422	30.9883	30.4179	30.2105	30.7152	29.7393	30.1202	29.9686	31.855	30.5424	30.7692	30.3723	29.8966	30.0149	31.2889	30.3643	30.4771	29.748	29.2265	30.6698	29.8471
O43493-2;O43493-5;O43493-3;O43493;O43493-4;O43493-6	O43493-2;O43493-5;O43493-3;O43493;O43493-4	Trans-Golgi network integral membrane protein 2	TGOLN2	TGOLN2	23.9025	22.506	22.8454	23.8199	21.628	24.4459	23.8266	21.7043	24.3255	22.7231	24.0344	22.7586	22.2968	23.2418	22.4504	25.5809	22.664	23.3145	23.3191	23.2313	22.9386	24.2372	23.6014	23.251	23.6291	22.8563	24.827	24.1951	24.6592	22.2065	23.2959	24.5244	23.4207	24.4708	25.4376	22.3298	23.8799	23.5352	22.7265	23.4313	23.5214	23.1021	24.2046	25.0508	24.7024
O43504;R4GMU8;E9PLX3;A0A0C4DGV4	O43504;R4GMU8;E9PLX3;A0A0C4DGV4	Ragulator complex protein LAMTOR5	LAMTOR5	LAMTOR5	27.189	27.2685	27.9475	27.9617	27.7821	27.315	26.4652	27.0909	26.1187	28.8	27.0059	27.1913	27.8593	27.4086	27.943	28.3832	27.9847	27.2584	28.3338	28.1237	27.6906	27.9178	27.726	28.3271	28.1304	27.8358	28.2792	27.566	28.2482	28.7422	28.6743	29.3777	28.5924	28.0859	28.3591	27.6768	24.1532	27.9935	26.754	28.0297	28.1352	27.3273	28.2575	27.9407	27.8263
O43583;F8VVL1	O43583;F8VVL1	Density-regulated protein	DENR	DENR	28.5834	28.6845	28.1214	27.8557	28.0252	27.9498	27.8986	27.6242	27.9664	27.3485	27.2861	27.8406	27.0772	27.243	27.5688	27.7951	27.835	27.7347	27.7703	27.3394	27.5125	28.0587	27.2596	27.3507	27.9096	27.9511	27.6373	27.6657	28.1643	28.0619	27.7423	27.9716	28.0266	28.0491	28.3546	27.5899	26.6203	27.3348	28.1716	27.7995	25.8232	28.335	28.4796	28.2789	28.3982
O43615;M0QXU7;M0QXM9;M0R301	O43615;M0QXU7	Mitochondrial import inner membrane translocase subunit TIM44	TIMM44	TIMM44	30.6573	30.9221	30.541	30.3601	30.4459	30.8457	31.0201	30.963	30.7288	31.3117	30.7701	30.843	31.1281	31.0882	31.4007	31.1425	31.5099	30.8705	31.2348	30.9586	31.589	31.0561	31.0969	30.8393	31.1256	31.1588	30.9219	30.8571	30.8545	31.3017	31.3619	31.1403	30.9015	31.0528	31.0126	30.6749	30.6563	31.2404	30.196	30.6905	31.0816	30.4277	30.7923	30.6796	30.3924
O43617;A0A087WWM0;O43617-2;A0A087WYS5;A6NKE1	O43617;A0A087WWM0;O43617-2;A0A087WYS5	Trafficking protein particle complex subunit 3	TRAPPC3	TRAPPC3	27.0129	27.4566	26.6079	27.4805	27.3084	27.4901	27.9806	27.1737	27.6282	27.1418	27.9964	26.5749	27.2281	28.4125	26.244	27.0124	26.4375	27.4854	27.0794	27.1657	25.9281	26.6857	27.5148	27.1261	27.654	26.4415	27.4741	27.2006	27.5741	27.7432	26.7487	26.9325	26.9485	27.6306	27.5053	26.4462	27.2104	27.3734	27.1486	26.795	27.8637	26.1639	27.2024	27.2508	26.5982
O43633;M0R1T5;M0R1L7;M0QXX8	O43633;M0R1T5;M0R1L7	Charged multivesicular body protein 2a	CHMP2A	CHMP2A	27.5858	27.2644	27.0404	27.7955	26.8272	25.7875	25.3174	26.3945	25.9566	26.4099	26.9808	26.537	26.5438	26.5963	26.6054	26.0494	26.6745	26.5441	26.3471	26.1916	25.9174	26.5992	26.4221	26.8298	26.0694	25.5879	27.0963	24.7716	28.0948	27.3675	25.9047	25.2214	25.8279	27.4102	25.4786	24.4787	27.2918	27.4033	28.1544	26.8387	27.4036	27.729	25.361	25.8769	28.382
O43676;C9JKQ2	O43676;C9JKQ2	NADH dehydrogenase [ubiquinone] 1 beta subcomplex subunit 3	NDUFB3	NDUFB3	32.4261	31.7819	32.2517	31.2241	31.4278	31.51	32.1854	31.9906	32.0888	32.7153	32.2882	31.7886	32.2024	31.652	32.2339	32.3279	32.2967	32.1534	32.2925	31.8755	32.0958	32.2269	31.5149	32.1705	31.7744	32.0217	31.8291	32.2244	32.0575	32.9602	32.7446	32.4158	30.5271	31.7885	32.2051	31.875	31.076	32.5832	30.8282	31.9483	32.3087	31.7264	31.6681	31.9467	30.8659
O43677	O43677	NADH dehydrogenase [ubiquinone] 1 subunit C1, mitochondrial	NDUFC1	NDUFC1	26.3222	26.0301	27.2518	26.6738	28.0812	27.8965	27.2694	28.0448	28.7699	26.7758	25.9367	27.895	28.1648	27.2679	27.0258	28.8705	24.6447	28.1238	27.664	27.8344	27.4346	25.9295	27.9367	27.6611	26.6185	23.42	28.4315	28.1211	26.4391	28.2731	27.966	26.6014	27.5085	27.5791	27.0854	26.5096	25.4294	28.7356	27.3758	27.2719	28.089	25.4559	26.4993	29.0504	27.0321
O43678;O43678-2;A6NJG2	O43678;O43678-2	NADH dehydrogenase [ubiquinone] 1 alpha subcomplex subunit 2	NDUFA2	NDUFA2	31.8899	31.9732	32.1121	31.9007	31.5285	31.2013	31.7283	32.5108	31.7114	32.9304	33.016	32.5835	32.6584	32.1571	32.6907	32.4036	32.6522	32.5634	32.3113	32.3677	33.1042	32.2878	32.2571	32.5806	32.4807	31.9772	32.3492	32.0015	31.614	32.2225	32.8431	32.7059	31.7575	33.0527	32.2669	31.805	32.9361	32.298	31.6218	32.4413	32.8401	32.805	32.8823	32.3637	31.8728
O43681;A0A087WXS7;K7ERW9	O43681;A0A087WXS7	ATPase ASNA1	ASNA1	ASNA1	29.8508	29.9198	29.874	29.9589	30.2931	30.0742	29.9743	29.731	29.6535	29.6632	30.0312	29.7486	29.744	30.0692	30.3356	29.6502	29.8887	30.0634	29.2705	29.6144	29.8667	29.6709	29.5299	29.833	30.3087	30.0406	30.21	29.8693	30.3859	29.5572	29.858	29.7592	30.2254	30.0249	30.431	30.0523	29.7869	30.131	29.8532	29.614	29.8043	30.2953	29.9596	29.7698	30.2349
O43684-2;O43684;J3QT28;J3QSX4	O43684-2;O43684;J3QT28	Mitotic checkpoint protein BUB3	BUB3	BUB3	26.019	25.4563	23.0909	25.8599	25.6994	25.49	25.6425	25.4435	25.8895	26.0031	26.8098	23.3034	25.5256	26.1288	25.6956	26.4861	25.2167	26.823	26.3416	23.8135	25.9493	23.3824	24.2549	26.2171	26.3754	24.7064	24.9899	25.5482	26.3629	24.2125	26.8208	26.074	27.1891	25.9478	27.4476	26.1244	25.0851	26.0222	26.299	26.4237	25.4211	26.0553	25.8744	26.3742	21.5368
O43707;O43707-2;F5GXS2;O43707-3;K7EP19;D6RH00	O43707;O43707-2;F5GXS2;O43707-3	Alpha-actinin-4	ACTN4	ACTN4	33.9755	34.0771	33.7836	34.2702	34.047	34.8659	33.7742	33.6767	33.5286	33.7397	33.6506	33.6569	33.7604	33.899	33.973	34.0238	33.7269	33.5929	34.0382	33.7988	34.0106	33.9574	33.9811	33.6721	34.4612	34.0979	34.4451	34.1483	34.8138	34.1552	34.0702	33.7257	36.0467	33.9766	34.5799	34.2273	33.7718	33.9044	35.3981	34.4626	34.4022	33.831	33.6922	33.7208	33.7309
O43715	O43715	TP53-regulated inhibitor of apoptosis 1	TRIAP1	TRIAP1	23.8545	23.1543	25.1331	24.4319	23.0887	27.1684	26.7007	23.7137	26.621	27.4802	25.7	27.1356	26.6105	26.748	23.9281	27.5317	27.3003	26.7761	26.6943	26.7219	26.3176	27.0549	27.7262	27.6805	26.8359	23.8856	27.5402	22.422	24.8184	27.6188	28.1182	24.0583	24.2927	27.1388	24.3468	24.7364	24.763	26.5235	21.9889	22.7565	26.6075	23.8976	22.6978	24.4206	22.8449
O43719;Q5H919;Q5H918	O43719	HIV Tat-specific factor 1	HTATSF1	HTATSF1	26.1616	25.9253	25.5261	23.5996	24.3937	25.5817	25.9798	22.883	24.9197	25.993	24.6742	23.2286	24.9113	26.6802	22.38	24.8265	27.1702	26.2016	27.014	26.5257	23.2341	25.4215	24.6237	26.3197	22.6929	26.5512	26.2233	25.0215	24.1051	25.9805	26.5499	26.761	26.6543	26.6296	25.9754	25.7513	24.8276	26.4617	24.8904	26.7612	24.3168	24.8893	23.9894	25.985	24.8399
O43739-2;O43739	O43739-2;O43739	Cytohesin-3	CYTH3	CYTH3	23.7986	22.8894	24.2512	25.3107	24.6589	23.6909	24.6826	25.133	24.545	24.1636	25.4284	22.6499	24.434	24.9914	24.4598	25.3881	23.1865	25.3197	24.6953	23.5737	24.4828	25.1882	24.8586	23.6047	23.9912	22.8985	24.8016	25.2484	25.1059	22.7163	23.8753	24.8286	25.5608	25.5301	25.898	25.434	23.9147	24.5955	23.5728	24.8547	24.9422	22.6928	24.089	24.2605	23.3986
O43741;O43741-2	O43741;O43741-2	5-AMP-activated protein kinase subunit beta-2	PRKAB2	PRKAB2	28.943	29.8116	29.3927	29.1886	29.3865	30.0303	29.7511	28.781	29.3579	29.4933	28.6954	29.1059	29.6053	28.9645	29.1848	29.0236	29.4854	28.775	29.972	28.5131	29.331	29.1808	29.2813	29.1253	29.5928	29.9359	29.6705	29.3943	29.7862	29.6148	29.4882	29.7422	29.9292	28.6407	29.3615	29.8619	29.582	29.6031	29.0097	28.4875	29.3753	29.0669	29.1281	28.8621	29.3211
O43747;O43747-2;H3BNR4;H3BR36;H3BUN9;B4DGE1;H3BRM7;H3BN71;H3BN75;H3BS13;H3BV30;B3KNW1	O43747;O43747-2	AP-1 complex subunit gamma-1	AP1G1	AP1G1	26.1329	26.6084	26.8022	26.6602	26.3039	27.562	23.893	26.6857	26.5146	26.918	26.2838	27.1045	27.699	27.7459	27.9999	28.0543	27.477	27.0191	26.6295	27.3682	27.5876	27.1799	26.736	27.3574	26.4114	26.4912	26.4053	27.1371	26.9662	26.8327	26.7229	26.4935	27.0142	26.3674	26.8189	26.6359	26.8684	26.6242	26.9783	28.2266	26.0523	23.5161	26.629	26.6642	25.5094
O43760;O43760-2;K7ELS8;K7ELD9;K7ENG9;K7EJ35	O43760;O43760-2;K7ELS8;K7ELD9;K7ENG9	Synaptogyrin-2	SYNGR2	SYNGR2	26.7593	24.5569	25.8192	26.1722	26.7121	27.1127	26.2168	26.0996	25.5732	27.189	26.1847	24.7443	25.4861	26.7037	26.7809	26.4902	26.135	26.2284	26.0886	27.0995	26.321	27.1758	26.546	27.5659	26.8179	26.148	27.1014	25.8725	26.6698	26.5363	26.4845	26.9734	26.4491	27.1368	25.4675	25.9632	24.3586	25.9259	26.7681	27.3912	26.7133	26.4311	26.5232	25.2253	26.4523
O43765;K7EMD6;K7ERW5	O43765;K7EMD6	Small glutamine-rich tetratricopeptide repeat-containing protein alpha	SGTA	SGTA	28.572	27.3116	28.4376	28.1704	28.0976	28.0278	27.7299	28.6995	27.4973	28.0679	28.2837	28.2871	28.0523	28.7831	28.3901	27.4831	28.5158	27.5284	28.2938	28.3747	28.5674	28.618	27.866	28.0572	28.2057	27.3206	27.8588	28.5207	28.4971	27.8221	28.2424	26.9596	28.2803	28.1284	27.8029	27.2775	26.4444	28.4536	28.6559	23.654	28.3854	27.9175	28.2269	27.3598	28.0529
O43766;D6RCP8;A0A1X7SBR7;A0A1W2PPM2;O43766-3;O43766-2;A0A1W2PQE9;A0A1W2PRE7;A0A1W2PNQ5;Q6P5Q6;A0A1W2PQS9;A0A1W2PR40;B4E0L7;A0A1W2PQ87	O43766;D6RCP8;A0A1X7SBR7;A0A1W2PPM2;O43766-3;O43766-2;A0A1W2PQE9;A0A1W2PRE7	Lipoyl synthase, mitochondrial	LIAS	LIAS	26.486	23.7353	25.2354	24.8498	24.2648	24.8581	26.0285	25.5271	27.0421	26.6792	25.919	26.5955	25.6737	24.1162	26.3085	25.2932	26.7734	25.7834	26.0577	25.8608	25.9287	26.3174	25.6699	25.5868	23.6599	23.5714	25.3214	26.0432	26.5809	26.7138	26.0718	26.8099	27.2966	25.4033	27.2507	26.189	24.0803	26.5249	24.0686	25.6132	26.1476	25.4589	26.597	23.6374	22.6183
O43772	O43772	Mitochondrial carnitine/acylcarnitine carrier protein	SLC25A20	SLC25A20	31.9805	31.8179	31.874	31.9405	31.8496	32.0569	32.1385	31.6756	32.1598	32.7641	32.42	32.1371	32.3892	31.2711	31.3196	31.9517	32.2461	32.0308	32.1841	31.8398	32.0616	31.5381	32.6327	31.8389	32.2704	32.4429	32.0183	32.1264	32.2089	32.6179	32.4567	32.4386	32.231	31.9829	31.9616	32.2767	31.2173	32.2394	30.4004	31.9042	32.1473	32.4899	31.6459	31.5758	32.0228
O43776;K7EIU7;K7EPK2;O43776-2;K7EMQ6;K7EQ35;K7EJ19	O43776	Asparagine--tRNA ligase, cytoplasmic	NARS	NARS	30.2489	30.279	30.4977	29.8001	30.2112	29.9943	30.1898	30.3459	30.0557	29.8785	30.0099	29.3929	29.7844	30.415	30.2	29.8073	29.6452	29.7943	30.1622	29.889	29.8921	29.8825	30.0464	30.1317	29.808	30.3036	29.7837	29.9158	30.249	30.0641	30.28	30.0314	30.0282	29.9871	30.1396	30.3835	29.987	30.462	29.8635	30.1975	29.9242	29.7572	30.0517	29.2869	30.1135
O43795-2	O43795-2	Unconventional myosin-Ib	MYO1B	MYO1B	22.9482	27.6321	27.1255	26.201	25.9666	25.8463	26.6262	27.7698	27.0756	26.9204	27.1344	27.078	26.235	29.2041	26.5413	29.8165	26.7356	25.9764	26.9355	27.3823	28.3402	27.5055	27.1611	25.2855	27.197	27.3829	27.2382	26.7848	27.1074	27.7201	27.1804	26.7982	27.7528	27.8896	27.5764	27.4615	28.8418	26.9198	25.4564	26.6672	27.0066	26.9661	27.7385	23.9149	26.0865
O43809;H3BND3;H3BV41	O43809;H3BND3	Cleavage and polyadenylation specificity factor subunit 5	NUDT21	NUDT21	27.6656	26.9284	27.4118	28.0895	28.2385	28.3777	27.7693	27.2507	27.2692	27.8038	27.7884	27.0277	27.0838	28.5576	27.619	28.3729	28.1962	27.885	27.5361	27.8174	27.9308	28.9428	28.0458	27.0305	28.0938	28.5461	27.8324	28.3427	28.0033	28.0912	27.8637	27.8368	28.0916	27.933	27.6171	28.7922	28.7882	27.1785	28.2748	28.0841	27.841	28.4552	29.1379	28.2353	26.4619
O43813;E9PHS0;F8WDS9;H7C2E3	O43813;E9PHS0	LanC-like protein 1	LANCL1	LANCL1	30.5232	30.5387	31.0219	30.8275	30.849	30.5942	30.7701	30.3909	30.8602	30.8393	30.5292	30.6869	30.3991	30.3017	30.3488	29.5772	30.5183	30.7329	30.6242	30.2786	30.299	30.3562	30.7383	30.571	30.733	30.235	30.7886	30.4028	30.7228	31.1593	30.6968	31.2201	30.3109	30.2414	30.8756	30.8736	30.2022	30.5917	30.6497	30.3816	30.8861	30.6857	30.6212	30.9824	30.4103
O43815	O43815	Striatin	STRN	STRN	29.018	29.1923	29.1416	29.0879	29.3924	29.4273	29.0222	29.0747	29.2396	28.2947	27.8938	28.9967	28.1195	29.5823	28.5775	29.2974	28.6661	28.3744	28.9631	29.3179	28.4679	29.1039	28.498	29.1418	29.2018	28.8195	28.8467	28.3244	28.5532	29.0139	28.8185	29.491	28.8157	27.4375	28.774	28.6516	28.2699	27.879	27.336	26.0873	28.1834	28.3922	29.0853	28.162	28.9476
O43819	O43819	Protein SCO2 homolog, mitochondrial	SCO2	SCO2	27.1613	25.9894	24.8249	24.6788	26.1996	27.3869	26.2799	24.5811	25.2045	26.3748	26.2194	22.2565	25.765	22.5126	26.5823	26.901	25.8762	23.1116	25.9392	26.0188	26.6581	26.1638	26.3941	27.1306	26.4376	26.1466	25.3823	26.1903	26.3298	26.0163	25.4299	25.8348	26.5269	26.0376	25.4187	25.8649	24.8729	25.8692	23.9593	25.4319	23.6935	26.6991	27.0102	27.5057	26.663
O43823;M0QYL4	O43823	A-kinase anchor protein 8	AKAP8	AKAP8	23.5275	21.9102	23.2601	24.3169	23.8071	22.9085	23.5722	24.7716	23.3203	24.3139	24.0699	22.4819	23.9319	24.8099	23.9046	24.5778	24.5817	23.3613	24.2888	22.9313	23.4561	23.4458	24.5174	23.7911	23.8408	24.9875	24.6431	24.7323	24.5993	24.563	24.8109	24.1959	23.708	24.4004	23.358	25.6161	26.7596	24.6128	24.3142	24.3315	25.038	24.1959	24.0891	22.899	24.4989
O43852;O43852-3;O43852-6;O43852-5;O43852-15;O43852-10;O43852-9;H0Y875;O43852-13;O43852-14;O43852-11;O43852-12	O43852;O43852-3;O43852-6;O43852-5;O43852-15;O43852-10;O43852-9;H0Y875	Calumenin	CALU	CALU	31.9148	31.4543	31.6473	31.8141	31.7981	32.585	31.7743	31.6531	31.9697	31.6998	31.5656	31.7182	31.7671	33.1617	32.1707	32.4783	31.4851	31.4416	31.3192	32.1376	31.9856	31.7547	31.5576	32.1338	31.587	31.9801	31.5514	31.7272	32.0373	31.7597	31.786	32.0316	31.8532	31.4889	32.3667	31.3229	31.2888	31.3542	31.5878	30.8176	31.8616	31.2207	31.9087	31.6314	31.8268
O43865;O43865-2	O43865;O43865-2	Putative adenosylhomocysteinase 2	AHCYL1	AHCYL1	26.5149	27.1639	27.3275	24.3525	25.4686	26.2824	26.5291	25.7852	26.885	25.6004	26.2611	26.6276	25.9348	26.5335	25.852	26.1334	25.7792	25.5496	26.299	26.1213	26.3527	25.5892	25.7501	26.5242	26.4363	22.8054	26.2478	25.348	26.4942	25.1505	26.5189	26.8684	26.9563	25.353	26.358	26.5729	23.0375	25.8344	27.0319	25.9422	23.5942	26.5878	25.9114	26.3942	26.1285
O43866	O43866	CD5 antigen-like	CD5L	CD5L	23.2538	23.5842	25.0408	22.593	23.8864	24.7346	22.6781	22.8961	23.3418	22.6438	24.2201	26.1608	27.0402	24.9596	22.8448	23.3549	26.1518	23.9456	25.122	25.5548	23.6983	23.0421	22.7201	24.1034	22.4148	26.644	24.2797	22.9235	26.1877	24.9387	23.7215	25.0287	25.9479	25.2654	27.5242	26.2759	26.0912	25.2998	26.7526	25.4489	26.4333	24.3398	25.2127	24.4279	27.0272
O43920	O43920	NADH dehydrogenase [ubiquinone] iron-sulfur protein 5	NDUFS5	NDUFS5	31.9451	31.9118	32.4571	31.757	32.0534	32.0795	32.2201	32.0805	32.4848	32.4094	32.4206	32.5896	33.0955	32.0884	32.6317	32.3584	32.5642	32.9841	32.6682	32.4518	33.2939	32.8513	32.3058	32.7	32.0147	31.7343	32.5431	31.8812	32.1563	32.3173	32.6732	32.7559	31.6071	32.3748	31.7954	32.1692	32.5861	33.0326	31.6965	32.415	33.0694	32.1976	31.9938	32.9488	31.843
O43924;B8ZZK5;C9IZ52	O43924;B8ZZK5;C9IZ52	Retinal rod rhodopsin-sensitive cGMP 3,5-cyclic phosphodiesterase subunit delta	PDE6D	PDE6D	23.2198	24.4955	24.7472	26.2085	26.4432	23.608	25.1345	23.5281	23.5868	23.8031	23.1958	25.4239	24.3285	23.3516	25.427	24.789	24.6146	22.6444	25.2328	23.0877	23.3161	25.4913	23.715	24.1399	24.7661	22.9273	24.8291	25.2963	26.3455	23.9761	24.6355	22.88	24.5963	25.8005	25.6938	25.2752	25.0334	24.8724	24.0855	26.0798	23.1043	25.1783	25.8121	25.418	24.5302
O60216;E5RFV8;E5RIN7;E5RJW1;E5RJK5;E5RI01;E5RFZ5;E5RG18;A0A140T8W2;Q9H4I0-2;Q9H4I0	O60216	Double-strand-break repair protein rad21 homolog	RAD21	RAD21	23.3182	25.8831	23.2768	23.7656	23.2436	25.2475	23.9231	24.6399	26.8567	23.4765	24.1275	24.4682	26.9441	26.5244	26.4869	27.2794	24.3338	23.6699	26.7378	24.4632	27.7793	25.81	24.3197	24.125	23.9837	23.0202	26.8373	25.2766	26.9984	24.4899	21.5893	24.0316	26.4826	23.1577	25.1898	23.42	26.354	28.2751	28.0798	27.4295	26.6486	28.7031	28.8075	29.1317	26.5116
O60220;A0A2R8YDA8	O60220	Mitochondrial import inner membrane translocase subunit Tim8 A	TIMM8A	TIMM8A	28.7167	29.4376	28.3276	28.4048	28.6369	28.3395	28.8518	28.5497	28.4693	29.4328	28.6628	28.7137	29.232	28.9495	28.7907	28.6514	29.8878	29.0523	29.1445	28.8646	29.8004	29.5637	28.726	29.2872	29.2181	28.9629	29.549	29.4345	29.5094	29.0668	29.3025	29.6659	29.4495	28.5127	29.2586	28.9667	28.8913	29.4673	28.0083	24.2162	28.9708	28.8335	29.3409	28.1904	29.2782
O60237-6;O60237;O60237-5;O60237-2;H7C4R6;Q6GQY8	O60237-6;O60237	Protein phosphatase 1 regulatory subunit 12B	PPP1R12B	PPP1R12B	31.8476	31.778	31.7796	31.7268	31.9139	31.4904	31.6508	32.0703	31.5563	31.5704	31.1485	31.4972	31.5375	31.2969	31.6846	31.4435	31.6476	31.6441	31.9637	31.2529	31.2942	31.2094	31.4436	31.5157	31.9211	31.5957	32.2856	31.6295	31.9877	32.2567	31.9497	32.1117	31.7803	31.7486	31.7939	31.3662	31.4934	31.9764	32.1379	32.2947	31.5561	31.8582	31.925	31.9903	31.707
O60238-2;H0YBC7;O60238	O60238-2;H0YBC7;O60238	BCL2/adenovirus E1B 19 kDa protein-interacting protein 3-like	BNIP3L	BNIP3L	28.1629	28.4674	23.6708	27.4399	29.4624	29.4333	28.5108	26.2151	24.3147	27.7071	24.3776	23.8346	28.6803	25.5741	23.6931	23.4851	23.482	27.7505	28.9072	23.9925	23.4586	23.9228	27.8669	23.8007	24.1327	23.4824	23.3717	23.4138	28.9047	23.0461	28.5405	30.3632	24.693	22.9052	23.9355	28.6078	25.2662	28.634	25.3229	29.0467	23.4986	23.3257	24.4888	24.5885	27.4663
O60240;H0YM16	O60240	Perilipin-1	PLIN1	PLIN1	31.7559	26.6761	25.0951	27.7453	24.3786	27.3046	22.1944	23.3113	23.3637	24.0629	22.834	28.3366	25.6111	28.649	26.3171	24.7189	24.4273	25.1123	29.7276	23.8479	26.1299	21.608	27.1721	22.8266	26.9927	31.6922	25.513	27.0157	29.2521	22.0004	23.8241	20.9151	28.1092	27.8622	25.2168	24.7742	26.391	23.9493	32.7065	27.1503	26.8292	23.4615	22.0091	23.9686	25.9591
O60256;O60256-3;O60256-2;O60256-4;E7EPA1;C9K0K7;I3L0S1;C9JDU5;C9JJS3;C9JDH0;E7EW35;I3L331;I3L164;I3L4G9;I3L1T1;I3L3B8;I3L2J4	O60256;O60256-3;O60256-2;O60256-4;E7EPA1;C9K0K7;I3L0S1	Phosphoribosyl pyrophosphate synthase-associated protein 2	PRPSAP2	PRPSAP2	28.9786	29.7428	28.4521	29.8859	28.9673	28.2724	29.7549	28.6149	29.142	28.5294	28.8625	29.1298	28.363	28.3548	29.0354	28.6905	29.0398	29.1937	28.88	28.7035	29.0129	28.8614	28.352	27.8736	29.3189	27.5861	29.7438	29.2146	29.37	28.0469	28.5087	28.6552	28.6227	29.1912	29.076	28.4316	29.7453	28.8279	28.7242	28.403	28.9589	29.1917	29.1652	29.7875	29.1966
O60262;K7ESC6	O60262;K7ESC6	Guanine nucleotide-binding protein G(I)/G(S)/G(O) subunit gamma-7;Guanine nucleotide-binding protein subunit gamma	GNG7	GNG7	29.0051	29.2785	29.2355	28.0736	28.2299	28.4456	27.9533	29.4328	29.2152	29.8378	29.241	28.6544	28.9531	28.2659	29.0213	29.3207	31.0093	28.9576	29.5199	29.4669	29.5054	29.3485	29.3801	28.9734	28.751	30.0421	28.3073	28.6787	27.995	29.5148	29.1452	29.0824	29.0503	29.9796	29.3259	28.3494	29.1305	29.0382	27.9226	27.9193	28.7897	30.0506	30.0624	29.1882	28.8307
O60264	O60264	SWI/SNF-related matrix-associated actin-dependent regulator of chromatin subfamily A member 5	SMARCA5	SMARCA5	23.5893	23.4966	24.8678	23.468	23.1822	22.5796	24.8825	24.0947	23.8965	24.0848	23.665	24.5048	22.0964	23.0421	24.4755	23.8584	23.992	23.6562	23.7797	25.2099	24.1198	25.5066	24.2362	24.3693	24.7687	25.0089	24.8837	23.7172	23.6	21.8749	23.0942	22.8493	24.0165	23.7884	23.37	23.5492	22.9881	23.7282	25.4282	24.1526	23.3825	24.5977	24.6185	24.6609	24.2445
O60271;O60271-3;D6RHI8;H0YBE9;H0YBS5;H0Y981	O60271;O60271-3	C-Jun-amino-terminal kinase-interacting protein 4	SPAG9	SPAG9	26.6326	27.1493	24.3411	26.2059	27.7257	27.007	25.9224	25.8553	23.3204	25.9718	26.2512	26.6072	25.9524	26.1337	27.0808	26.6146	26.7598	26.2428	27.2907	26.3711	26.1147	25.4962	23.0801	27.0129	26.6431	27.2089	27.5435	27.0116	26.0005	26.714	26.6058	26.9203	27.431	27.5958	26.6814	27.063	24.2916	26.0611	26.8648	28.2821	24.845	26.616	27.135	27.2043	25.5342
O60313-2;O60313-10;O60313;O60313-11;C9JMB8;E5KLJ9;O60313-9;A0A2R8Y3X5;A0A2R8YE78;O60313-13;A0A2R8YGE5;A0A2R8YD53;A0A2R8Y4Q3;A0A2R8Y4G4;A0A2R8YE54	O60313-2;O60313-10;O60313;O60313-11;C9JMB8;E5KLJ9;O60313-9;A0A2R8Y3X5;A0A2R8YE78;O60313-13;A0A2R8YGE5	Dynamin-like 120 kDa protein, mitochondrial;Dynamin-like 120 kDa protein, form S1	OPA1	OPA1	33.967	33.6898	33.4305	33.7015	33.6372	33.9509	33.9757	33.8096	33.6926	33.7658	33.4675	33.9042	33.7905	33.2738	33.9194	33.3616	33.8382	33.7684	33.6771	33.5863	34.0216	33.7377	33.6399	33.5099	33.4946	33.6758	33.7503	33.6473	33.9712	33.8625	33.7362	33.8017	33.3223	33.5328	33.4631	33.5592	33.2363	33.7338	33.2754	33.8096	33.8691	33.5655	33.5435	33.6103	33.5479
O60331-4;O60331;O60331-2;O60331-3	O60331-4;O60331;O60331-2;O60331-3	Phosphatidylinositol 4-phosphate 5-kinase type-1 gamma	PIP5K1C	PIP5K1C	23.2855	23.3221	27.0447	23.5065	23.1103	23.7706	23.2121	22.9862	24.7432	26.3545	23.3608	24.4645	24.0484	25.1719	25.8679	24.9026	26.2062	24.9725	25.473	24.5182	22.7026	25.1906	25.8847	27.7792	23.8654	22.9714	25.166	24.7969	24.9049	24.9139	23.7972	23.8432	25.173	23.6044	24.1155	22.8651	23.5774	22.7804	23.5591	23.2555	21.6502	23.1161	22.677	25.2865	23.3495
O60343-3	O60343-3	TBC1 domain family member 4	TBC1D4	TBC1D4	27.7089	27.3245	27.0983	26.6319	27.6488	26.6828	27.3253	25.8576	26.3971	27.1736	26.9942	27.9886	28.1444	27.222	28.6854	26.9508	28.1854	27.4305	28.0272	27.6706	28.5235	27.0207	28.454	26.9837	28.2426	28.4948	27.8782	28.0157	27.3014	26.0838	27.9071	27.5595	26.7235	27.7186	27.0342	28.4191	26.8016	28.4215	27.1429	29.0795	27.7102	27.5836	27.8345	27.0459	27.4706
O60449-3;O60449-2;O60449;Q8IX05;A0A087WT00;Q8IX05-2	O60449-3;O60449-2;O60449	Lymphocyte antigen 75	LY75	LY75	29.1252	23.5522	28.2213	26.9547	28.2732	24.3193	24.0204	22.0976	26.7601	29.3971	26.0398	23.6908	23.8165	23.4189	23.9037	27.4647	27.9797	28.1653	25.8738	28.0128	27.9002	27.4721	26.56	22.4381	28.4324	24.7274	27.8604	26.6808	23.0695	24.3883	22.728	22.9704	25.5289	28.71	23.982	23.586	23.9794	25.017	23.5297	23.5752	28.8664	26.9376	28.4881	27.5079	28.6291
O60488-2;O60488;D6RF95;H0Y9A0;D6RD96;D6RFW9;D6RDA8	O60488-2;O60488	Long-chain-fatty-acid--CoA ligase 4	ACSL4	ACSL4	27.0289	26.3105	26.1762	24.7074	27.4699	27.6032	26.4074	28.0409	27.0854	27.4432	26.383	26.6633	23.4022	28.5522	28.361	29.2136	26.7012	27.0196	26.7591	28.1474	27.9262	27.9912	26.5789	27.4071	27.3904	26.9717	26.4968	27.2532	27.8385	26.9741	27.2363	27.3721	28.4926	26.8463	27.2277	26.6535	29.1163	25.5771	27.3124	27.5712	26.8108	27.863	26.4302	26.6126	26.0292
O60493;O60493-2;O60493-4;O60493-3	O60493;O60493-2;O60493-4;O60493-3	Sorting nexin-3	SNX3	SNX3	29.142	29.0756	28.7848	29.8502	30.2789	29.4925	29.6486	29.7254	29.447	28.2089	29.1054	29.3276	29.3209	30.2844	29.1489	29.3623	28.8933	29.1791	28.8636	29.3149	29.2318	27.9323	30.0407	29.2785	29.1984	28.2923	28.4291	27.9747	29.4411	29.9333	28.8885	29.8871	29.8473	28.8234	29.785	28.0089	29.26	29.2867	28.3823	27.7786	29.8886	29.434	29.3206	29.4408	29.5719
O60502;O60502-4;O60502-2;O60502-3;H7C3X0	O60502;O60502-4;O60502-2;O60502-3	Protein O-GlcNAcase	OGA	OGA	26.7335	25.6264	25.8754	26.4804	24.026	26.1183	26.5869	23.6122	26.2808	26.9426	27.6627	26.4171	26.261	27.1897	26.917	26.2545	27.0464	26.9232	26.3039	26.3787	27.1857	27.1553	26.1637	26.8105	27.1085	27.5907	25.6344	27.3915	26.7851	26.4313	26.4832	26.6998	27.1496	27.1375	26.6651	27.962	28.6134	27.0678	26.5908	26.8679	26.7626	26.2165	26.4724	26.4483	26.5636
O60504;E7EQH0;H0YB51;H0YAZ3;H0YAU6	O60504	Vinexin	SORBS3	SORBS3	29.1802	28.8838	28.5735	28.8193	28.6651	28.8809	29.031	27.9203	28.7744	28.3014	28.1386	28.6299	27.7396	27.915	26.544	27.9064	28.2593	28.371	28.5165	27.3181	27.2997	27.2313	27.4673	27.8201	25.4399	28.8465	27.2172	28.9185	29.2383	28.0295	28.4186	27.1937	30.2331	28.4234	29.4092	29.037	27.6997	27.8727	28.8257	28.8266	28.1584	29.3241	28.2913	27.5383	28.3727
O60506;O60506-2;F6UXX1	O60506;O60506-2	Heterogeneous nuclear ribonucleoprotein Q	SYNCRIP	SYNCRIP	30.1588	30.3318	29.9104	30.4536	30.1443	30.3865	30.2155	30.6159	30.2677	30.5332	30.0447	29.9994	29.5909	30.881	30.2347	30.7376	30.0303	30.0679	29.9687	30.3114	29.3072	30.0789	30.1052	30.1512	29.9923	30.1829	29.8571	30.0417	30.495	30.4795	30.4295	30.4839	30.5498	29.8164	30.5863	30.2166	30.2293	29.7996	29.9852	29.7398	30.0312	29.9885	29.5709	30.1235	30.1431
O60518;A0A096LPA6;A0A096LNS2	O60518	Ran-binding protein 6	RANBP6	RANBP6	25.5096	25.618	23.6509	25.9082	22.9506	27.5341	24.9755	25.3823	26.4332	25.8149	27.1891	26.5328	23.2807	27.8262	26.4674	26.8728	25.8012	26.568	25.8301	26.7747	26.2892	25.8418	26.2007	23.3001	25.7394	26.3016	26.9839	26.3815	26.2986	26.1632	26.9265	26.1989	22.4583	26.7248	23.9404	27.6435	29.2586	24.5658	27.0077	22.8901	27.1852	22.5162	25.3446	26.682	25.2698
O60547-2;O60547	O60547-2;O60547	GDP-mannose 4,6 dehydratase	GMDS	GMDS	22.3095	23.5269	23.8031	22.444	25.2405	25.0671	23.8994	26.8554	22.8052	24.5856	23.1496	23.5676	23.6618	24.1941	22.4546	24.3532	23.1785	25.1746	24.2717	22.6321	24.6804	23.16	23.3937	22.3797	22.564	23.4468	23.6448	24.0001	23.0601	23.8683	23.4578	24.1491	25.062	24.0155	24.4794	23.5733	23.6968	24.5205	24.1972	23.4058	21.4191	24.4545	24.2709	24.79	23.7038
O60568;H7C2S8;C9JU11;C9JIX5;H7C2A8	O60568	Procollagen-lysine,2-oxoglutarate 5-dioxygenase 3	PLOD3	PLOD3	23.2953	25.4458	22.8369	26.0534	25.6309	25.9078	24.8672	26.2793	22.1819	26.3605	24.7025	25.0426	25.5693	27.9532	26.1351	27.2873	24.2084	23.3755	24.4576	25.4464	22.6792	25.4934	25.6215	26.1916	23.4683	25.3896	24.5125	24.7921	25.2496	24.126	23.8346	22.5487	27.0481	25.1023	25.8046	23.2111	22.2126	25.0859	23.7849	25.622	23.3284	23.557	25.8122	23.6291	25.866
O60645-3;O60645;O60645-2;D6RB59;H0Y995;D6RBR9	O60645-3;O60645;O60645-2;D6RB59	Exocyst complex component 3	EXOC3	EXOC3	25.5814	22.8936	26.0379	25.4078	25.7738	25.6924	26.475	25.9612	27.486	26.5391	25.4539	25.1345	26.0482	26.4002	25.4824	26.4934	26.1558	26.1876	25.713	26.5969	26.1026	26.3646	26.218	25.471	25.8094	26.4187	26.9781	27.352	26.2782	25.9483	26.3031	26.4219	27.1731	25.8493	25.525	26.9404	25.8028	26.086	26.7246	26.0399	26.0131	25.4029	24.4348	27.1695	26.0929
O60662;O60662-2	O60662;O60662-2	Kelch-like protein 41	KLHL41	KLHL41	30.9158	31.6537	31.0269	30.5196	30.8876	31.4045	31.1791	31.3031	31.2142	30.257	30.9452	30.8199	31.4201	32.2996	31.8743	31.914	30.735	30.9934	30.4922	31.9352	30.4971	30.772	30.8252	31.8422	30.23	30.769	30.758	30.5631	30.3741	30.8074	30.9865	30.8948	30.2763	30.2967	31.2817	30.937	30.7343	30.6446	30.2972	30.6881	30.6596	30.1588	31.0374	29.5038	31.0049
O60664-4;O60664;O60664-3;K7EL96;K7ER39;K7EJD0	O60664-4;O60664;O60664-3	Perilipin-3	PLIN3	PLIN3	29.999	30.3736	30.1464	30.2127	30.2022	30.4811	30.3685	29.612	29.976	30.5111	30.0435	29.95	29.6186	31.0228	30.4026	30.1326	29.7718	29.5273	30.3814	30.1213	29.9847	29.8617	29.7071	29.8574	30.2138	30.7646	30.2713	29.6396	30.3879	30.3635	30.1565	30.1303	31.2281	30.1777	30.5911	30.3521	29.2643	29.9304	30.1285	30.2241	30.2028	30.1031	29.9231	29.3945	29.5362
O60669;F8W0N3;F8VS95;F8W0U4;F8VXG4;F8VYZ2;F8VVU7;F8VQS4;F8W1M4	O60669;F8W0N3	Monocarboxylate transporter 2	SLC16A7	SLC16A7	24.6105	24.7186	26.4325	26.0808	25.3483	26.6264	25.074	26.8235	26.8959	27.0162	26.6591	27.8815	25.8843	26.8105	27.0265	26.4939	27.7657	27.6288	27.6559	26.3969	27.3447	27.6731	26.8866	26.9778	26.5098	25.9036	26.8136	26.3649	26.6232	26.4581	26.9144	26.8839	28.0709	26.7566	27.5698	28.5253	29.1894	26.7186	27.4623	28.0163	28.2609	27.3152	25.9654	26.4521	25.922
O60684;Q5TFJ7;S4R3E5	O60684;Q5TFJ7	Importin subunit alpha-7	KPNA6	KPNA6	27.2712	25.6361	23.6976	26.2547	23.9514	26.7827	26.6698	26.1663	24.3677	26.8769	26.0959	26.3436	26.5436	27.5892	27.3148	26.3806	26.2543	26.5852	26.6242	26.978	26.6943	25.8087	26.1108	27.3617	26.5722	27.9651	27.3635	26.3334	27.9714	26.797	26.6147	27.2489	27.4344	25.2133	27.7844	27.0502	25.3311	26.9596	27.1411	27.0957	26.5439	27.0073	27.029	25.7235	27.1182
O60701;O60701-3;O60701-2;E7ETF4;E7EV97;E7ER83;E7ER95;D6RHF4;E9PBD2	O60701;O60701-3;O60701-2	UDP-glucose 6-dehydrogenase	UGDH	UGDH	27.3875	27.2521	26.8881	27.0688	26.9119	27.2932	26.5076	26.7019	26.7866	25.1245	26.5413	26.2521	25.5534	28.6541	26.9922	28.2344	23.1153	25.4112	26.19	27.3185	24.7975	25.6629	27.2097	27.1535	26.4821	27.5696	27.8915	27.2081	27.1315	26.8043	25.6301	27.1478	28.5096	26.0101	28.0537	27.6681	24.1858	27.389	27.4512	27.0142	27.4731	25.9359	25.9737	26.7643	26.654
O60706-2;O60706;H0YFV4;A0A2R8YHG6;A0A2R8Y6Q0	O60706-2;O60706;H0YFV4	ATP-binding cassette sub-family C member 9	ABCC9	ABCC9	23.539	24.1048	24.7439	23.4406	22.454	23.299	22.6299	24.0566	23.4954	23.6519	23.7182	23.5446	24.7371	24.8073	24.1837	24.8276	25.7004	25.7341	25.682	25.0865	25.31	25.9589	23.279	24.8859	24.4595	25.2169	25.5855	25.1266	26.0471	22.1557	23.0196	22.628	24.4207	25.5228	24.4438	24.2969	22.7751	25.0245	23.3815	25.2939	25.7615	23.7615	22.398	25.4757	23.6159
O60716-5;O60716-3;C9JZR2;O60716-8;O60716-7;O60716-2;O60716;O60716-13;O60716-11;O60716-6;O60716-4;O60716-21;O60716-19;O60716-16;O60716-15;O60716-10;O60716-9;O60716-24;O60716-23;O60716-18;O60716-17;O60716-14;O60716-12;O60716-22;O60716-20;O60716-29;O60716-27;O60716-32;O60716-31;O60716-26;O60716-25;O60716-30;O60716-28;E9PKY0;H0YC95;E9PKL1	O60716-5;O60716-3;C9JZR2;O60716-8;O60716-7;O60716-2;O60716;O60716-13;O60716-11;O60716-6;O60716-4;O60716-21;O60716-19;O60716-16;O60716-15;O60716-10;O60716-9;O60716-24;O60716-23;O60716-18;O60716-17;O60716-14;O60716-12;O60716-22;O60716-20;O60716-29;O60716-27;O60716-32;O60716-31;O60716-26;O60716-25;O60716-30;O60716-28	Catenin delta-1	CTNND1	CTNND1	28.9937	28.8829	28.8662	29.1186	29.0151	28.997	29.0148	28.9733	28.6294	29.2906	28.9007	29.0268	28.0923	29.6424	29.3506	29.7021	29.7542	28.8488	29.1169	29.1078	29.9422	29.5094	28.8952	28.8831	29.1799	29.554	29.5217	29.2213	29.3029	29.8144	29.4783	29.1123	29.6668	30.0823	28.2958	29.7713	28.4983	28.9834	29.0152	29.3283	29.8486	28.287	27.8246	28.4371	28.2833
O60725	O60725	Protein-S-isoprenylcysteine O-methyltransferase	ICMT	ICMT	26.0568	25.5976	24.3301	25.299	25.9262	25.5106	23.9578	25.5611	25.9188	23.2378	25.1883	24.9163	23.5943	26.8806	25.6473	25.138	22.8717	23.8107	22.8291	24.6804	25.3643	25.5631	23.0306	23.2722	25.0783	26.3277	26.0265	24.1442	25.218	22.4035	22.0624	25.3946	26.12	24.4028	26.5022	23.1524	24.6784	25.281	25.2623	25.5343	26.1886	23.0914	22.6428	24.8656	24.2827
O60733-2;O60733;O60733-4;O60733-3;B0QYE9;F8WEQ9;F2Z3G2;F8WEN3;M0R3D9;M0R1Q9;H0Y6W2;H7C3P5;H0Y7G5;H0Y6T3	O60733-2;O60733;O60733-4;O60733-3;B0QYE9	85/88 kDa calcium-independent phospholipase A2	PLA2G6	PLA2G6	29.474	29.858	28.2465	29.3621	29.5052	28.4036	29.3239	29.493	29.6229	28.2557	28.5712	23.3985	26.952	28.4904	28.9986	29.3982	28.5496	29.2159	28.4608	22.0477	27.8631	28.2677	29.1758	29.2032	27.375	27.6879	28.9425	28.6384	28.1192	29.5403	29.7699	29.7115	30.1399	27.3254	29.8542	28.8196	29.5672	28.0283	28.0457	25.695	28.1323	25.7353	24.2755	29.5877	29.4771
O60739;K7EQP2	O60739	Eukaryotic translation initiation factor 1b	EIF1B	EIF1B	27.4206	27.7014	26.6451	26.0371	26.393	26.2807	26.2959	26.3572	26.0806	26.6931	27.2394	25.8049	27.0873	26.5337	26.2756	26.0509	26.7016	27.2976	26.7777	26.0045	26.5799	27.2968	26.8431	27.2391	26.212	26.888	25.0681	27.1812	26.7222	27.0227	26.8485	27.3111	27.4336	26.6116	27.9605	26.7334	27.244	26.2205	25.4371	25.8693	26.6274	23.2746	27.9958	26.7325	26.9947
O60749;O60749-2;D6RC15	O60749;O60749-2	Sorting nexin-2	SNX2	SNX2	28.7838	29.0404	29.033	29.118	29.1201	29.0951	28.7739	28.5919	28.8107	28.5354	28.2374	28.6408	28.4947	28.5285	29.0414	28.908	28.4926	28.7876	28.7653	28.6057	29.2766	29.1635	28.3693	28.2319	29.0711	29.1664	29.0382	29.0657	29.234	28.8711	28.9187	28.807	29.6953	29.0149	29.5941	29.3239	28.7432	29.2835	29.7338	29.1345	29.249	29.2402	29.0267	28.9514	28.2168
O60763-2	O60763-2	General vesicular transport factor p115	USO1	USO1	30.5249	30.5575	30.715	30.475	30.9129	30.8197	30.645	30.5657	30.5769	30.3015	30.2836	30.4065	30.2235	30.5632	30.8178	30.6513	30.4828	30.3628	30.506	30.658	30.4977	30.5003	30.2047	30.5859	30.5878	30.8324	30.4622	30.4286	30.5677	30.5897	30.4938	30.3617	30.7359	30.3625	30.6776	30.5965	30.1766	30.5883	30.6339	30.7371	30.3454	30.1814	30.5705	30.2535	30.2469
O60783	O60783	28S ribosomal protein S14, mitochondrial	MRPS14	MRPS14	27.3555	27.4336	28.598	27.2911	27.371	27.5667	27.7598	27.9381	27.5728	27.9385	27.3798	27.6814	28.6843	27.7847	26.8615	27.5278	27.7042	27.6382	28.7754	27.2612	27.7889	27.938	27.7722	27.2934	28.1973	28.3371	27.768	25.5859	28.53	27.9372	28.6142	27.5445	28.0363	27.7502	28.1622	27.7309	26.4391	26.5143	27.7645	28.2028	27.5592	28.1149	27.7634	27.4447	27.2803
O60784;O60784-2;O60784-4;O60784-3;B0QY01;V9GYF4;B0QY02;Q6UW50;H7BYN7;F8WB30;F8WAW7;F8WE29;F8WBB0	O60784;O60784-2;O60784-4;O60784-3;B0QY01	Target of Myb protein 1	TOM1	TOM1	29.8821	29.9123	29.7307	29.5455	29.8047	29.855	30.2676	30.2808	30.0735	30.0847	29.4875	30.1317	29.9661	29.9816	30.4334	29.6234	30.3889	30.0947	30.223	29.9393	29.5728	30.1042	30.3947	29.7832	29.6083	30.7171	30.5283	30.1279	30.1553	30.2481	30.4016	30.0764	29.2811	29.957	29.3091	30.7041	30.0469	29.9568	29.633	28.4731	30.4524	29.0826	29.1827	29.0676	29.1869
P62807;P57053;O60814;U3KQK0;Q99879;Q99877;Q93079;Q5QNW6;P58876;Q5QNW6-2	P62807;P57053;O60814;U3KQK0;Q99879;Q99877;Q93079;Q5QNW6;P58876;Q5QNW6-2	Histone H2B type 1-C/E/F/G/I;Histone H2B type F-S;Histone H2B type 1-K;Histone H2B;Histone H2B type 1-M;Histone H2B type 1-N;Histone H2B type 1-H;Histone H2B type 2-F;Histone H2B type 1-D	HIST1H2BC	HIST1H2BC	34.1403	33.3445	34.4465	34.4455	33.6259	34.1726	33.5243	34.4241	34.2128	34.6303	35.3136	34.6435	35.3689	34.8733	34.7625	35.0031	34.8324	35.1695	34.9947	34.7745	34.7704	35.1541	34.4907	34.7541	34.9755	33.4584	34.7835	34.428	34.3993	34.2598	34.4488	34.4834	35.151	34.8121	34.3455	34.4957	35.3257	35.1792	35.2381	35.7714	35.0775	34.2188	34.6428	35.1436	34.3496
O60825;F6RAZ1;I1Z9G3;P16118-2;P16118;F6XNB3;H0Y483;Q4VBA9;Q16877-3;A0A087X278;A0A087X2H4;A0A1W2PNV9	O60825	6-phosphofructo-2-kinase/fructose-2,6-bisphosphatase 2;6-phosphofructo-2-kinase;Fructose-2,6-bisphosphatase	PFKFB2	PFKFB2	30.6711	30.818	30.7961	29.8622	30.5932	30.4845	31.0468	30.1915	30.4213	29.4545	29.9194	30.4666	30.5185	30.3069	30.292	29.7395	29.5768	29.9227	30.465	29.7086	30.3689	29.7376	30.3796	30.1855	30.5826	30.3523	30.0038	30.2477	30.0022	30.1642	30.1192	30.629	30.3591	29.6791	29.9655	29.938	29.8799	29.9783	29.0954	30.2526	30.0208	30.2604	30.3161	30.2318	30.32
O60825-2	O60825-2	6-phosphofructo-2-kinase/fructose-2,6-bisphosphatase 2;6-phosphofructo-2-kinase;Fructose-2,6-bisphosphatase	PFKFB2	PFKFB2.1	25.2244	25.9163	23.869	23.8091	25.788	24.8429	25.7673	25.2863	24.5497	23.7116	24.0464	26.0453	24.4895	23.6899	24.7418	24.1372	25.634	24.5653	25.0357	25.2251	24.2657	25.2449	24.5617	22.9944	24.9386	24.6355	24.0963	24.7613	25.4278	25.1633	25.2236	25.3536	25.8399	22.808	25.1068	23.549	25.6035	24.8162	23.3235	25.6704	23.4196	24.6955	25.7224	24.5131	25.0864
O60826	O60826	Coiled-coil domain-containing protein 22	CCDC22	CCDC22	24.1283	25.6815	24.6726	23.6085	24.8167	25.8997	24.9041	26.3257	23.4245	22.3408	24.0733	25.6912	26.0225	25.2419	25.9074	25.569	24.1448	25.8084	25.8092	24.7794	25.7353	26.7523	23.9827	22.9772	24.1609	27.2783	22.7192	25.6513	26.7329	25.2298	25.7126	25.5185	26.2424	22.5588	26.0636	25.529	23.3228	25.8106	25.3656	25.4436	26.3537	23.5046	25.8401	25.2479	25.2987
[truncated: 3,324 more rows]
[truncated: 30 more columns]

## Sheet: original
Supplementary table 5 - original log2 LFQ intensity values.
[truncated: 4,133 more rows]
[truncated: 29 more columns]
